# Supplementary material for: Raised water temperature enhances benthopelagic links via intensified bioturbation and benthos-mediated nutrient cycling
Source: PeerJ. 2024 Feb 28;12:e17047. doi: 10.7717/peerj.17047 (PMC11636707; doi:10.7717/peerj.17047)
Supplement: File S1 [file peerj-12-17047-s002.xlsx]

## Sheet: Sheet1
Luminophore Burial Depth	A1_Front	A1_Back	A2_Front	A2_Back	A3_Front	A3_Back	A4_Front	A4_Back	A5_Front	A5_Back	A6_Front	A6_Back	A7_Front	A7_Back	A8_Front	A8_Back	A9_Front	A9_Back	A10_Front	A10_Back	A11_Front	A11_Back	A12_Front	A12_Back	C1_Front	C1_Back	C2_Front	C2_Back	C3_Front	C3_Back	C4_Front	C4_Back	C5_Front	C5_Back	C6_Front	C6_Back	C7_Front	C7_Back	C8_Front	C8_Back	C9_Front	C9_Back	C10_Front	C10_Back	C11_Front	C11_Back	C12_Front	C12_Back	H1_Front
0	0	4.595	5.973	1.378	14.014	0	4.595	5.054	1.3784	7.122	4.135	2.527	0.6892	0.459	0	0	0	0	0	1.1486	0	0.919	0.2297	0.2297	3.446	2.068	17.459	3.676	3.216	3.676	3.676	5.054	12.635	8.959	3.905	1.149	7.581	1.378	2.068	1.838	38.135	4.365	1.838	2.068	2.068	3.676	20.446	3.676	28.716
0.0094	0.9189	52.608	65.703	20.216	75.122	0.6892	31.473	52.608	17.4595	58.581	54.216	38.365	23.2027	17.689	5.514	1.378	3.676	0.4595	0	15.8514	5.743	41.122	5.5135	17.6892	71.216	102.919	86.838	79.946	118.77	87.757	81.784	78.568	101.77	118.541	87.068	60.189	101.541	56.284	81.095	63.635	140.824	51.459	48.243	72.135	72.135	70.068	130.716	74.662	130.257
0.0187	4.1351	125.662	141.514	45.257	132.784	1.6081	63.865	127.5	35.8378	118.77	98.784	76.5	55.1351	59.041	48.243	3.905	21.824	0.6892	0	32.8514	17.459	118.311	12.8649	46.4054	176.203	197.568	163.108	174.595	202.162	172.527	187.689	179.189	195.73	200.784	189.986	164.257	187.689	155.068	172.297	186.311	212.27	152.77	158.973	192.743	192.743	186.77	201.014	184.473	208.824
0.0281	7.5811	172.757	169.311	62.946	157.135	1.8378	85.919	156.905	44.5676	147.257	119.23	96.946	76.2703	78.797	85.23	5.284	31.932	0.2297	0	42.9595	29.176	145.878	19.9865	63.1757	222.378	231.797	187	211.811	235.703	210.892	226.973	224.216	231.568	238.459	229.73	219.162	216.865	212.5	216.635	234.095	234.554	208.595	224.216	234.554	234.554	234.095	222.608	229.959	242.595
0.0375	9.1892	198.716	183.324	67.541	161.73	3.6757	94.419	167.932	45.4865	157.365	128.649	106.824	78.1081	84.77	101.081	5.743	34.459	0	0	49.1622	31.932	152.311	19.7568	69.1487	235.014	242.135	196.878	218.473	244.892	221	232.716	232.946	244.662	248.797	241.676	242.365	232.027	234.095	229.5	250.176	242.365	224.676	242.135	246.5	246.5	243.054	221.689	238.689	251.554
0.0469	10.5676	208.595	186.541	67.081	157.365	5.0541	96.946	170.23	47.0946	161.041	124.973	108.432	78.5676	89.135	99.932	5.514	35.378	0	0	52.6081	32.622	157.595	20.4459	75.3513	240.757	245.581	206.068	219.162	247.189	218.243	230.189	228.122	249.027	249.716	243.973	248.108	235.014	241.676	233.635	252.014	242.824	227.203	245.351	249.946	249.946	242.135	218.703	239.608	254.081
0.0562	11.027	208.135	191.824	71.446	150.932	5.5135	92.122	167.932	46.4054	163.338	122.446	111.649	75.5811	89.135	102.23	5.743	36.297	0	0	57.4324	34	155.527	19.0676	78.7973	243.284	245.122	215.257	216.635	248.338	210.662	225.824	224.216	248.338	248.797	247.189	251.324	235.014	242.365	232.716	252.932	240.297	224.216	246.73	250.176	250.176	241.676	212.73	237.77	255
0.0656	11.4865	201.703	193.203	73.514	143.581	6.4324	93.5	167.932	50.7703	161.27	125.892	106.135	76.2703	86.149	99.473	7.122	34.23	0	0	57.2027	34.689	157.135	17.2297	79.4865	240.527	244.203	224.216	206.986	248.797	213.649	222.838	218.243	248.108	246.27	247.419	250.865	233.865	244.892	232.257	252.473	243.514	221	247.419	250.405	250.405	237.77	210.203	236.392	255
0.075	11.4865	192.973	195.959	72.824	137.838	5.5135	93.5	164.486	55.1351	164.486	127.5	105.676	75.8108	85.689	96.486	5.514	35.149	0	0	58.5811	32.851	163.108	17.4595	81.5541	242.135	245.351	229.27	207.676	249.027	209.514	223.986	211.811	246.73	244.203	249.027	249.716	236.622	245.122	233.635	251.095	242.365	222.378	249.716	245.581	245.581	236.851	209.973	236.162	254.541
0.0844	10.3378	184.703	192.284	72.135	131.405	5.973	97.176	162.878	53.527	164.027	130.716	105.676	76.7297	83.851	97.405	5.743	36.297	0	0.23	60.8784	36.297	166.554	15.8514	81.0946	240.068	242.365	230.419	204.689	249.716	207.446	219.162	213.189	243.514	241.905	247.419	247.878	236.622	244.662	235.473	252.473	240.757	224.216	249.946	246.27	246.27	232.716	209.973	234.784	254.77
0.0937	10.5676	191.824	191.365	74.892	125.892	7.3514	97.405	166.784	50.5405	166.554	131.635	104.757	79.9459	82.473	94.878	7.122	32.392	0	0	64.7838	36.068	164.946	15.8514	84.3108	240.527	240.068	224.446	203.541	249.257	205.378	219.622	210.203	243.743	243.973	246.959	247.878	234.784	241.676	239.608	252.014	239.149	220.311	247.649	242.824	242.824	229.959	209.973	232.946	255
0.1031	11.7162	188.608	192.284	70.527	121.757	7.5811	100.622	167.932	47.7838	172.527	130.716	106.824	74.2027	79.946	95.108	7.122	29.405	0	0	65.9324	33.77	167.473	16.0811	81.5541	241.905	240.527	224.446	204.689	246.5	206.757	223.757	209.284	243.743	244.203	245.122	248.338	232.257	239.149	240.527	250.865	241.446	217.324	244.662	243.514	243.514	228.811	202.851	230.419	255
0.1125	13.7838	197.797	193.432	67.311	116.243	5.973	98.324	165.635	50.0811	176.892	128.649	113.027	72.5946	81.095	96.716	8.5	27.797	0	0	66.6216	32.162	171.378	17.9189	82.2432	241.446	239.838	220.311	202.162	242.824	208.135	222.608	208.595	241.905	244.892	243.054	246.5	229.959	236.622	239.838	249.027	237.311	215.946	248.108	243.514	243.514	223.297	202.851	229.041	254.77
0.1219	15.6216	193.892	190.676	68.459	112.797	3.4459	96.716	167.932	46.4054	177.351	128.649	110.27	71.9054	77.878	96.946	8.959	29.405	0	0	66.1622	29.865	176.432	16.0811	85.4595	239.608	239.838	218.473	195.5	241.676	211.351	219.622	208.135	240.068	246.27	243.514	246.73	229.27	238.689	235.703	247.189	241.216	213.189	246.27	241.676	241.676	226.514	203.541	231.797	254.77
0.1312	14.7027	195.5	187.919	71.676	109.122	2.2973	105.905	164.027	45.2568	176.892	128.189	113.716	74.6622	77.419	91.432	8.73	30.784	0	0	65.7027	30.095	176.662	17.6892	82.2432	236.392	237.311	219.392	196.419	235.473	211.122	216.176	209.514	240.297	243.973	243.743	247.189	228.351	235.932	232.027	243.054	233.865	216.635	244.662	243.514	243.514	229.959	206.068	226.743	254.311
0.1406	15.6216	202.622	185.392	68	105.676	2.527	104.297	160.581	44.7973	178.73	128.189	115.095	77.4189	73.514	91.662	8.959	31.932	0	0	67.7703	28.946	176.662	15.6216	82.9324	237.311	232.946	217.095	198.716	231.797	208.365	217.324	207.216	239.838	243.973	238.919	244.662	227.892	237.311	234.095	236.851	239.378	211.811	243.514	242.365	242.365	229.041	206.068	225.365	253.392
0.15	15.3919	208.595	179.189	68	103.149	3.2162	106.365	161.5	43.4189	184.703	128.419	117.851	76.5	73.514	93.27	8.73	27.108	0	0	68	28.946	180.338	15.1622	78.5676	233.865	236.392	222.838	197.338	226.973	201.473	213.878	211.581	238.689	245.122	234.784	245.581	224.676	236.162	235.473	231.108	241.676	209.973	238.689	240.986	240.986	230.649	205.608	224.905	252.703
0.1594	14.9324	214.108	177.351	65.014	101.541	4.1351	108.662	170	42.5	186.311	128.878	118.77	80.8649	78.568	99.932	9.419	25.73	0	0	71.4459	27.797	179.419	14.2432	75.5811	234.784	234.784	222.149	200.784	222.149	196.649	211.351	209.284	237.311	243.743	231.568	243.054	225.135	236.851	233.865	231.338	238.689	204.23	237.081	236.392	236.392	232.257	200.784	221.689	253.392
0.1687	16.3108	215.486	181.486	64.095	99.473	5.0541	107.514	168.162	42.9595	185.392	130.027	117.392	79.7162	74.203	99.014	9.878	25.959	0	0	71.2162	24.811	178.73	14.473	74.8919	243.054	232.027	218.932	205.838	215.027	198.027	212.959	212.959	238.23	241.905	233.635	237.311	226.284	236.622	231.797	228.122	236.162	202.622	232.486	237.541	237.541	229.041	198.946	223.757	252.932
0.1781	18.1486	220.77	181.716	61.338	101.541	4.3649	111.189	172.068	43.1892	187.689	127.5	119.459	81.3243	75.351	93.5	9.649	25.5	0.2297	0	73.5135	24.122	174.135	14.7027	75.1216	241.446	230.649	220.081	204	209.284	195.73	215.946	214.108	237.77	242.365	232.027	235.932	225.365	234.554	234.324	228.122	234.095	206.757	232.257	242.595	242.595	229.5	196.189	228.581	253.162
0.1875	18.3784	220.541	180.568	61.797	100.392	5.5135	113.257	171.838	44.3378	189.068	128.419	119.459	80.8649	74.203	98.095	9.189	23.892	0.4595	0	71.6757	25.27	167.473	14.7027	77.4189	244.662	232.027	220.081	198.946	205.608	185.851	219.851	210.203	238.919	239.378	232.027	233.865	226.973	231.568	236.622	231.568	234.095	210.892	226.514	245.122	245.122	223.068	196.419	224.905	254.081
0.1969	20.2162	219.392	177.351	64.554	99.932	5.7432	112.568	173.676	44.3378	187.459	134.851	117.851	84.7703	72.135	97.635	10.568	24.581	0.2297	0.23	71.4459	23.662	170	15.3919	76.2703	241.216	230.419	213.419	201.014	194.811	181.716	218.473	213.189	240.757	240.068	225.824	232.027	223.297	230.419	234.324	226.514	233.176	210.892	222.149	241.216	241.216	221	192.284	222.149	254.311
0.2062	19.9865	216.635	179.649	67.081	97.405	5.7432	116.703	172.986	44.3378	184.473	138.757	119.919	88.4459	73.284	93.041	7.581	22.284	0	0.459	70.7568	27.108	174.824	13.0946	74.2027	238.689	230.649	213.419	199.176	186.081	172.527	222.378	213.878	239.378	236.851	222.378	228.351	224.446	228.811	236.162	224.446	233.635	211.122	214.338	238.919	238.919	224.216	188.608	219.622	253.622
0.2156	21.1351	224.216	177.811	65.473	94.189	5.2838	117.851	175.284	45.4865	186.77	141.054	119	89.1351	76.041	98.554	6.892	24.122	0.6892	0.689	69.8378	27.568	172.986	12.4054	74.8919	240.068	233.176	209.054	199.176	172.068	164.257	220.541	214.108	240.757	237.77	220.311	222.608	225.365	230.189	235.014	226.054	233.176	216.635	210.662	240.297	240.297	223.986	189.527	221.23	253.392
0.225	19.9865	219.392	179.878	65.932	90.743	3.9054	115.784	178.041	45.9459	187.919	138.986	119.459	88.9054	77.649	95.108	5.514	24.811	0.4595	0.689	70.527	25.5	180.108	11.7162	76.9595	239.608	236.162	215.716	200.554	172.757	157.365	214.568	215.486	241.216	235.473	219.622	219.392	226.054	229.041	237.77	226.054	234.095	215.257	203.541	240.068	240.068	217.324	191.365	222.378	250.865
0.2344	20.9054	224.446	177.122	66.851	86.378	2.9865	113.946	179.419	50.3108	188.378	128.419	120.149	89.3649	83.162	93.041	4.824	27.797	0	1.149	68.9189	21.135	173.216	12.8649	74.8919	241.905	237.081	217.554	199.176	162.189	141.743	217.554	214.338	243.973	236.392	213.189	216.865	223.757	226.743	235.243	228.351	233.865	215.716	202.392	239.149	239.149	220.081	188.838	221	252.703
0.2437	22.0541	227.432	172.757	66.162	88.446	3.4459	109.581	177.811	48.7027	184.014	129.797	120.149	88.2162	83.162	91.432	6.432	27.338	0	1.608	70.7568	19.757	177.811	12.6351	75.1216	239.838	236.392	216.405	198.486	151.851	132.324	214.338	210.892	242.365	239.149	208.595	217.784	219.162	228.581	233.176	226.973	232.716	210.892	199.865	234.324	234.324	219.622	184.703	222.838	253.162
0.2531	22.5135	227.432	176.662	68.689	80.635	2.9865	115.324	174.824	49.1622	186.541	130.027	120.608	89.3649	86.378	92.351	7.351	30.095	0.2297	1.378	70.9865	18.149	176.662	14.9324	72.1351	234.554	234.784	214.568	201.243	141.284	121.297	209.514	210.892	238.689	238.689	201.703	214.108	216.405	225.824	234.324	229.959	237.311	211.122	193.892	232.946	232.946	219.392	184.703	220.541	252.932
0.2625	25.7297	227.662	177.351	64.784	80.865	1.8378	116.014	178.959	48.0135	184.703	131.176	118.77	87.0676	84.311	89.365	8.5	30.554	0.2297	1.149	71.6757	17.23	174.595	14.0135	71.2162	234.095	231.797	206.986	206.757	132.324	107.743	207.216	215.716	235.473	239.149	197.568	215.257	212.041	228.581	238	232.716	233.865	208.824	190.676	231.568	231.568	218.932	183.095	217.784	252.243
0.2719	25.0405	228.122	176.432	65.014	73.973	0.4595	114.176	178.5	45.7162	185.622	129.108	116.703	88.2162	84.081	89.135	8.959	32.622	0	1.149	70.9865	20.676	170	13.5541	70.2973	235.473	231.108	206.986	203.311	122.676	100.162	207.676	214.108	226.973	236.622	191.365	214.797	212.5	231.108	232.716	230.649	231.568	206.757	190.446	232.716	232.716	218.932	187.689	218.703	251.784
0.2812	25.0405	227.203	172.068	68	73.743	0.2297	115.095	184.703	44.5676	183.554	128.189	114.176	89.1351	82.014	87.297	10.797	36.068	0	1.378	70.9865	23.662	172.527	13.0946	70.527	234.554	230.189	206.068	197.797	117.622	93.27	216.405	215.946	227.203	237.77	189.527	215.027	213.878	228.122	238.919	225.365	233.405	207.905	192.743	232.257	232.257	220.311	182.635	216.176	251.784
0.2906	26.6486	228.122	167.243	67.541	71.905	1.1486	113.716	182.635	45.7162	182.176	125.892	108.662	90.0541	82.703	86.608	10.108	36.986	0	0.919	72.1351	22.514	157.824	13.3243	70.9865	232.257	233.865	201.473	195.27	111.878	88.676	207.905	211.351	227.662	234.095	188.838	213.649	211.122	220.311	235.932	228.811	231.108	212.27	192.743	235.014	235.014	222.149	184.243	214.797	248.797
0.3	26.8784	224.905	162.649	69.149	69.608	1.1486	109.811	179.419	44.7973	179.878	131.865	101.541	90.7432	84.311	86.378	12.405	38.595	0	0	70.0676	21.824	155.297	14.473	74.4324	232.027	233.176	193.432	198.027	107.514	85.459	206.527	212.5	223.986	235.932	184.243	212.27	207.676	225.824	236.851	229.959	231.797	206.757	191.595	235.932	235.932	221.459	186.77	213.419	249.716
0.3094	27.1081	218.243	158.284	70.297	66.392	0.6892	111.649	180.568	46.4054	177.811	133.014	97.405	91.6622	85.689	85.459	12.635	38.595	0	0	69.8378	21.595	150.243	14.7027	70.9865	232.027	226.514	191.595	199.635	103.608	80.176	207.905	209.973	224.216	234.784	178.5	208.595	209.973	221.689	237.77	229.041	229.959	205.838	190.676	233.176	233.176	222.838	187.23	215.027	247.419
0.3187	27.5676	212.959	154.378	75.122	65.014	0	113.486	183.784	44.7973	175.514	132.095	93.27	92.3513	87.068	82.473	12.176	31.703	0	0	71.9054	22.973	153.459	14.2432	70.0676	230.189	229.041	191.595	194.581	102.919	70.297	207.905	210.892	225.365	236.851	175.284	206.757	213.189	219.622	239.838	226.743	227.892	203.081	188.149	232.946	232.946	223.527	189.297	208.824	245.811
0.3281	28.2568	212.5	154.149	74.432	62.486	0	110.041	181.716	45.7162	170	134.392	96.027	91.8919	88.676	85.23	13.095	32.622	0	0	70.527	21.824	158.284	15.3919	71.9054	227.203	229.041	185.622	190.676	101.77	63.176	209.973	209.284	221.919	237.081	170.919	203.77	210.432	222.378	240.527	226.054	225.135	202.622	187.459	228.122	228.122	221.919	189.297	208.365	243.973
0.3375	27.5676	213.419	142.203	82.014	59.041	0	104.757	183.095	42.7297	164.257	139.905	93.73	90.2838	85.23	87.757	11.946	31.014	0	0	70.2973	22.284	151.162	15.3919	72.1351	228.811	227.892	188.838	196.419	99.703	60.189	205.838	207.216	222.838	236.851	163.797	200.324	208.824	223.527	238.23	226.743	228.351	198.027	187.459	226.973	226.973	217.554	188.608	208.365	241.905
0.3469	29.4054	215.027	138.068	83.622	57.892	0	102.919	186.77	41.5811	162.189	142.432	90.973	92.3513	91.432	86.838	11.946	31.014	0	0	69.6081	21.365	147.027	16.7703	72.3649	230.189	230.878	183.554	192.973	96.027	59.73	201.473	207.216	220.311	234.554	160.122	197.568	204.689	222.149	238.459	227.432	219.622	195.041	189.986	224.446	224.446	221	183.554	210.662	243.973
0.3562	30.7838	213.878	124.514	85.689	55.595	0.4595	98.554	184.014	43.8784	162.419	141.514	89.365	89.8243	89.135	87.068	14.014	36.757	0	0	71.4459	22.743	148.405	19.0676	74.8919	228.122	231.568	183.784	197.568	96.716	58.811	203.77	207.676	222.149	231.108	155.527	193.662	204.919	217.095	239.608	227.662	218.243	192.973	188.149	225.135	225.135	215.257	181.716	206.986	240.986
0.3656	29.6351	209.054	110.959	88.446	54.446	0.6892	96.716	182.176	39.7432	160.122	141.284	87.527	91.2027	88.905	84.541	12.405	37.676	0	0	70.527	22.284	147.027	19.0676	73.5135	229.27	229.041	180.338	198.716	94.878	53.527	206.527	207.676	221.919	233.635	153.919	190.446	202.392	216.635	240.757	228.581	216.635	192.284	187.919	225.365	225.365	218.473	183.554	201.703	239.149
0.375	27.1081	208.365	106.365	93.27	48.703	1.3784	96.716	181.486	38.5946	161.041	138.297	87.986	92.1216	86.608	80.865	13.095	38.135	0	0	72.3649	22.284	139.676	18.8378	73.0541	229.73	226.743	179.649	192.514	92.351	47.324	206.297	209.743	222.378	231.338	150.703	184.243	199.865	213.878	241.446	226.284	217.324	193.662	189.986	224.446	224.446	212.959	181.486	196.878	239.608
0.3844	26.6486	204.23	104.297	95.108	48.243	2.0676	100.162	177.122	35.8378	153.919	138.527	85.919	93.2703	86.608	89.135	15.162	40.662	0	0	73.0541	23.662	138.757	19.9865	76.9595	226.743	221.23	180.108	194.122	90.973	45.716	204.689	207.905	219.851	232.257	143.811	183.095	202.162	214.338	242.595	225.135	215.486	194.351	190.216	221.459	221.459	213.419	185.162	201.703	236.622
0.3937	26.4189	199.865	102.23	96.027	45.946	1.8378	99.932	177.581	35.3784	152.77	138.757	89.824	92.8108	85.689	89.824	17.23	43.189	0	0	73.973	23.203	132.784	18.6081	76.0405	227.203	222.608	178.041	195.041	88.676	42.5	200.095	213.189	217.554	232.027	145.189	179.419	200.784	217.784	241.676	225.135	216.176	191.135	191.365	222.378	222.378	208.135	185.622	198.257	230.878
0.4031	27.7973	195.959	95.338	94.649	43.419	0.9189	95.108	171.378	34.6892	152.77	140.824	92.351	93.5	82.473	91.432	19.757	47.324	0	0	74.4324	22.514	133.473	19.9865	77.6487	224.905	214.797	175.054	186.77	85	36.757	200.324	209.054	213.419	231.797	141.514	175.054	200.784	220.541	240.527	224.676	213.189	194.122	190.446	216.176	216.176	205.608	184.473	196.878	230.878
0.4125	29.1757	194.811	86.838	96.257	39.973	0.6892	91.432	167.703	34	155.527	141.743	94.878	96.027	79.486	95.568	20.216	48.932	0	0	75.3513	21.595	129.338	19.527	74.4324	224.446	218.703	170.689	188.149	76.041	33.541	193.662	203.541	213.189	231.108	132.095	172.527	200.784	215.486	241.446	224.216	214.568	197.108	192.054	218.473	218.473	201.243	188.838	200.554	230.649
0.4219	31.2432	192.973	91.432	94.189	37.905	0.2297	88.676	165.865	32.1622	155.986	138.297	92.122	96.027	79.716	92.811	20.446	48.243	0	0	73.0541	20.905	122.676	19.0676	77.8784	222.378	215.946	168.851	189.297	73.054	30.554	199.405	207.676	209.973	234.095	129.797	165.865	200.095	217.095	241.446	223.527	212.27	195.27	195.73	215.716	215.716	203.541	187	195.73	227.662
0.4312	32.3919	190.676	87.757	97.405	35.838	0	85	161.041	31.2432	153.459	141.054	90.284	91.4324	77.419	91.662	22.973	46.635	0	0.23	72.8243	22.514	117.392	20.2162	79.7162	217.554	212.959	167.932	185.392	69.838	27.338	201.932	206.986	209.973	230.878	127.959	162.878	192.054	213.878	240.527	223.986	212.73	195.5	195.959	214.568	214.568	201.243	189.068	196.419	226.284
0.4406	33.0811	190.676	89.365	94.878	36.297	0	84.081	162.419	28.027	150.703	137.608	92.581	88.2162	80.405	93.5	23.892	45.027	0	0.23	70.9865	23.203	120.378	18.8378	76.5	217.554	215.486	167.014	185.162	67.77	24.122	196.878	207.216	207.676	229.041	122.676	158.284	191.135	213.649	238.459	221.919	208.365	193.203	195.959	210.203	210.203	201.014	185.851	192.514	225.365
0.45	30.5541	191.135	87.527	98.095	40.662	0	80.865	161.041	25.0405	155.986	137.838	92.581	83.3919	84.77	90.284	22.743	46.865	0	0.23	68.9189	22.973	113.716	19.527	75.5811	218.243	212.73	163.568	176.432	60.189	23.892	193.662	207.676	206.757	229.73	119.689	156.676	189.068	214.797	237.311	221	210.432	190.446	196.419	210.662	210.662	201.932	181.257	194.122	226.973
0.4594	32.3919	189.068	82.932	98.784	41.122	0	81.784	162.649	20.9054	153.23	136.919	91.662	85.4595	81.554	93.73	20.676	48.932	0	0.23	67.0811	23.432	108.662	17.4595	73.5135	215.027	212.041	161.5	164.486	54.446	20.905	192.973	212.041	201.703	228.811	114.176	150.014	192.514	215.946	237.311	222.608	216.405	190.905	197.108	211.122	211.122	206.068	177.351	193.203	228.122
0.4687	33.0811	191.365	84.311	98.554	40.203	0	80.176	157.365	22.5135	152.541	138.757	91.203	81.5541	84.541	89.135	25.5	50.311	0	0.459	65.2432	19.527	105.446	17.6892	75.1216	212.5	214.338	157.135	160.122	52.838	20.216	187.23	203.081	198.486	227.203	110.5	144.041	189.527	219.851	235.473	225.824	219.851	188.608	195.27	210.892	210.892	198.716	172.986	190.905	224.676
0.4781	34.4595	189.527	83.622	95.108	38.135	0	83.392	157.595	22.0541	148.635	137.838	93.73	81.3243	84.541	88.446	23.203	51.919	0	0.919	63.6351	18.149	101.541	18.8378	76.0405	206.068	215.027	154.838	156.676	52.608	20.216	188.608	204.459	196.878	226.284	106.135	139.216	187	217.095	227.662	224.446	218.243	188.378	192.284	208.595	208.595	199.865	167.703	187	222.378
0.4875	35.3784	191.365	79.027	93.73	38.365	0	86.378	148.176	19.7568	148.176	141.743	90.054	79.2568	86.378	90.743	25.959	52.608	0	0.689	65.2432	17.459	100.162	21.8243	73.973	202.162	217.324	155.757	150.243	50.311	18.149	186.541	206.757	193.662	227.203	102.23	134.392	181.946	218.932	225.595	221.23	219.162	192.054	193.432	210.432	210.432	194.351	170.459	186.311	220.311
0.4969	36.7568	189.527	72.135	97.405	36.986	0	85.919	143.811	16.7703	148.176	140.824	89.135	77.1892	86.838	89.824	28.716	54.216	0	0.689	63.6351	16.081	93.27	23.4324	76.7297	195.5	216.865	151.392	143.811	51	16.311	185.392	204.919	186.541	224.446	101.311	129.568	177.581	219.162	218.932	218.473	219.162	189.068	187	210.432	210.432	198.027	165.176	180.568	217.784
0.5062	34.6892	190.446	69.149	98.784	36.297	0.4595	86.149	138.068	14.7027	148.176	141.973	88.905	74.4324	85.689	86.608	31.932	53.527	0	0.919	63.1757	13.784	90.284	24.5811	75.1216	194.581	213.878	144.959	141.054	50.081	16.081	181.486	205.149	178.27	220.77	97.176	128.878	173.676	218.014	210.432	216.405	217.554	183.784	189.986	214.108	214.108	197.568	165.635	180.568	218.932
0.5156	34.6892	187.23	65.932	92.351	36.527	0.6892	84.081	133.243	15.6216	139.216	149.324	83.162	73.7432	85.689	88.676	33.311	58.581	0	1.149	61.1081	15.162	81.324	24.3514	73.973	193.203	217.554	135.081	133.014	49.162	12.865	181.027	204.459	177.811	219.851	93.041	129.568	171.149	217.324	207.216	219.162	217.095	182.865	185.851	211.581	211.581	197.108	165.176	175.973	217.324
0.525	35.3784	185.622	66.392	84.77	35.608	0.6892	85.919	131.405	14.9324	133.473	145.649	85	75.8108	86.838	87.527	36.757	59.73	0	1.149	62.027	16.081	74.892	25.7297	70.527	192.514	215.946	130.486	121.757	50.311	10.568	174.135	206.986	170.689	218.703	85.23	126.811	165.405	217.784	205.378	214.797	217.095	185.162	184.473	208.824	208.824	201.243	162.189	176.203	218.703
0.5344	34	186.541	63.405	83.392	35.378	0.6892	83.851	128.419	15.8514	123.595	144.73	76.5	71.4459	81.784	85.689	36.527	62.946	0	0.689	62.027	14.932	74.892	27.3378	68.9189	190.216	220.081	124.743	119.689	47.784	7.122	171.149	206.297	165.176	215.486	80.176	125.662	160.351	218.473	205.378	215.716	216.635	180.338	185.622	211.122	211.122	199.405	162.419	168.622	214.797
0.5437	34	184.703	63.405	76.27	33.081	0.4595	90.054	122.216	14.2432	116.473	141.973	73.514	65.473	85.689	86.838	37.216	64.554	0	0.459	63.6351	18.149	74.203	27.3378	68.9189	187.919	215.946	126.811	112.108	49.392	5.743	171.608	206.757	157.135	216.176	76.27	113.486	153.919	216.405	199.865	212.5	217.095	180.108	187.23	205.608	205.608	194.581	161.041	163.338	215.716
0.5531	33.5405	180.108	62.486	77.419	32.392	0.9189	90.514	117.392	14.0135	110.041	135.311	70.068	62.7162	88.446	80.176	32.622	65.703	0	1.149	60.6486	19.068	71.905	27.7973	71.4459	186.541	216.405	114.635	112.338	48.473	5.054	168.622	205.838	150.473	218.703	72.595	107.284	145.649	214.797	194.811	212.73	225.365	172.527	186.311	203.77	203.77	195.5	156.446	164.257	212.5
0.5625	36.7568	183.324	60.419	72.595	32.162	0.9189	92.351	116.703	15.1622	102.919	137.838	67.541	61.1081	83.622	76.959	33.541	66.162	0	0.689	60.1892	19.297	71.216	28.9459	72.1351	179.419	218.243	109.351	107.514	46.405	3.676	165.405	206.297	145.878	219.392	69.378	103.149	139.905	216.405	194.581	212.73	223.068	166.324	186.081	198.027	198.027	189.297	157.595	165.405	210.662
0.5719	37.6757	179.649	57.203	69.838	34.459	0.4595	91.662	113.257	16.7703	104.527	137.149	67.311	60.8784	82.932	75.811	33.541	70.986	0	1.149	60.8784	18.838	67.081	28.2568	70.2973	178.5	215.716	104.297	103.838	45.716	2.986	162.419	202.622	138.297	218.932	67.311	98.784	131.176	218.014	195.73	213.878	225.595	161.041	187.23	196.878	196.878	188.149	157.135	160.351	207.676
0.5812	35.8378	179.189	56.514	58.122	36.297	0.4595	96.486	106.365	16.7703	99.243	136.689	64.324	62.9459	79.716	74.662	35.149	73.973	0	0.459	59.5	20.676	63.176	28.7162	71.4459	181.257	213.419	104.297	100.162	45.486	2.068	163.108	199.635	139.446	216.176	64.554	96.257	125.432	219.162	191.365	212.27	219.851	153.23	184.932	194.581	194.581	182.635	154.149	157.824	203.541
0.5906	34.2297	176.892	57.662	57.203	34.689	0.2297	97.865	101.081	16.5405	100.622	135.081	58.122	59.7297	81.095	73.054	32.622	74.203	0	0.689	59.9595	19.297	65.014	25.7297	70.527	178.73	213.189	99.703	95.568	45.946	1.838	161.959	198.716	137.378	215.486	62.486	93.041	119.689	218.473	186.77	213.189	221	148.405	183.324	194.581	194.581	179.878	156.905	152.081	203.311
0.6	38.5946	171.378	55.824	51.919	35.838	0.2297	100.162	100.622	15.8514	102.919	134.392	54.216	59.9595	80.865	77.189	32.162	74.892	0	1.149	58.1216	22.514	68.23	24.1216	68.4595	176.203	214.797	97.405	92.581	44.568	0.919	164.486	195.73	134.392	211.811	61.338	88.216	116.243	218.243	180.338	209.743	221.459	148.176	185.851	189.527	189.527	183.324	153.919	150.243	199.865
0.6094	38.1351	165.405	52.838	52.149	37.676	0.6892	99.703	93.27	17	98.095	132.784	54.905	58.8108	78.568	78.568	34.689	77.419	0	1.838	58.1216	24.811	68.23	24.3514	68	172.986	214.797	91.203	86.149	43.419	0.919	159.203	193.892	134.851	214.797	64.324	84.081	113.257	216.865	168.622	206.297	218.473	146.797	190.216	185.392	185.392	178.041	151.392	149.784	199.405
0.6187	38.8243	165.635	52.378	53.757	36.757	0.6892	99.243	87.757	17.4595	96.716	125.662	51.919	56.973	76.5	74.432	36.986	76.5	0	2.297	57.2027	24.351	66.622	24.1216	68.4595	176.432	212.27	88.905	85.689	45.027	1.149	160.351	195.959	130.946	210.662	60.649	82.703	107.743	216.405	172.297	203.77	215.716	142.432	187.689	177.581	177.581	180.797	149.554	142.203	201.473
0.6281	37.4459	163.797	50.311	53.297	37.446	0.9189	100.392	83.851	18.1486	95.797	125.892	51.23	56.0541	78.797	69.378	33.77	78.338	0.2297	2.527	59.9595	24.122	63.635	24.8108	67.3108	172.527	214.108	80.405	80.176	44.108	1.378	150.473	193.432	130.716	209.054	57.662	82.014	102.689	214.568	169.311	199.635	220.081	132.095	182.405	178.5	178.5	175.743	149.554	137.149	198.486
0.6375	38.1351	162.649	51	48.703	38.365	0.4595	98.554	79.716	18.6081	95.108	122.216	51.919	60.4189	79.486	67.77	33.081	81.784	0	2.297	59.5	24.351	61.797	21.8243	62.4865	175.743	214.568	76.959	76.73	45.257	0.919	154.838	194.122	132.324	211.351	51.689	79.486	100.392	217.554	167.243	195.73	218.243	127.959	184.473	173.676	173.676	176.432	150.014	130.946	194.122
0.6469	38.5946	159.432	50.541	45.257	39.514	0	100.851	76.041	17.6892	93.73	121.527	46.635	58.8108	83.392	72.135	36.068	82.014	0	2.986	60.8784	23.432	64.784	25.5	63.4054	170.919	214.338	73.054	73.284	44.108	0.459	148.405	194.351	129.338	210.432	51.919	74.203	98.784	212.27	158.284	192.284	218.014	123.595	183.324	169.541	169.541	172.297	145.878	130.257	192.054
0.6562	39.2838	153.459	47.554	43.649	37.216	0	100.162	68.459	16.3108	91.432	119.689	47.324	57.8919	82.703	75.351	34.689	83.622	0	2.297	62.027	20.676	60.649	26.4189	61.1081	168.622	214.797	70.068	70.527	40.892	0.459	142.203	192.973	126.581	208.135	48.243	73.973	92.581	210.892	150.243	192.284	215.716	117.622	185.162	172.527	172.527	164.486	142.432	127.959	187.23
0.6656	39.973	153.919	44.797	38.135	38.135	0	104.068	63.865	17.4595	88.905	117.622	46.635	58.8108	87.068	72.365	33.081	82.703	0	2.068	61.5676	24.122	56.973	26.1892	61.3378	163.568	212.73	63.405	70.068	38.824	0.689	138.757	192.054	121.757	210.662	45.946	72.824	92.811	209.743	151.392	188.378	215.257	117.851	184.014	164.257	164.257	165.176	139.676	124.973	184.703
0.675	40.2027	154.149	45.946	40.662	39.514	0	106.595	59.27	18.6081	93.27	116.932	43.419	57.4324	90.973	73.284	32.851	85	0	2.297	59.0405	22.973	50.081	25.7297	59.0405	158.284	211.811	58.122	64.784	36.527	0.689	134.162	193.662	117.851	206.986	43.189	68.23	88.446	199.635	146.797	172.527	217.554	113.716	179.878	161.041	161.041	163.797	141.054	121.068	181.257
0.6844	39.7432	154.608	44.108	44.338	39.514	0	103.149	51.689	17.4595	93.959	112.568	43.189	57.2027	87.757	70.986	32.162	86.838	0	2.297	58.5811	22.284	50.311	26.6486	57.6622	155.297	208.365	60.189	61.797	34.689	0.459	130.257	194.811	112.797	203.541	44.108	63.176	85.919	209.743	144.959	170.23	217.784	110.27	179.878	158.284	158.284	158.973	138.986	117.392	176.432
0.6937	37.9054	153	43.649	45.257	40.203	0	103.838	50.311	15.3919	93.27	109.811	40.203	61.3378	89.135	70.527	31.473	88.905	0	2.068	55.8243	22.514	50.541	24.5811	59.0405	152.77	209.514	55.595	61.568	32.392	0.23	128.189	194.351	110.041	205.378	41.351	64.095	81.554	210.662	138.757	164.486	220.311	109.581	181.027	153.23	153.23	160.351	137.149	116.243	173.905
0.7031	38.1351	151.392	41.811	44.797	40.892	0	102	43.878	14.7027	91.432	111.878	40.892	62.9459	88.905	74.892	34	90.284	0	1.608	55.3649	24.811	51.919	22.7432	60.1892	150.473	210.432	57.662	59.27	31.703	0.23	127.041	191.824	105.905	203.081	44.108	62.946	76.5	213.419	129.338	157.365	216.635	107.514	180.108	150.014	150.014	158.514	136.23	111.419	172.757
0.7125	40.6622	148.176	43.419	43.419	41.351	0	100.622	39.514	14.9324	92.811	112.797	40.662	63.6351	90.743	71.446	34.689	90.284	0	0.919	56.7432	22.973	52.149	23.8919	59.7297	147.257	211.122	53.986	57.662	30.554	0.23	121.986	189.527	99.243	201.932	45.257	61.108	71.676	207.676	122.216	153.919	212.5	101.77	183.554	149.324	149.324	155.297	135.541	110.5	170.23
0.7219	41.3514	147.946	41.811	43.189	38.824	0.2297	101.081	36.527	14.7027	92.581	106.595	42.041	62.027	91.203	74.662	33.541	90.743	0	0.689	58.5811	22.973	48.014	24.8108	59.9595	137.838	212.73	51.23	56.514	29.865	0	116.014	187.23	96.716	201.243	44.338	61.108	73.514	204	116.932	150.932	210.662	95.108	184.703	143.351	143.351	150.473	133.243	112.108	164.486
0.7312	38.1351	143.122	39.973	45.716	38.365	0.9189	97.635	34.919	15.8514	95.108	99.243	39.743	63.6351	86.838	78.108	35.608	93.73	0	0.23	58.5811	25.041	43.419	23.6622	57.2027	133.014	209.743	48.473	57.432	28.486	0	109.122	185.392	94.189	198.257	42.5	57.432	68.919	204.23	113.716	148.405	208.824	91.662	185.622	140.595	140.595	148.176	131.405	109.122	164.716
0.7406	39.5135	137.608	38.824	44.797	38.365	1.1486	98.554	33.081	14.473	94.649	101.311	41.122	64.0946	88.446	74.432	36.986	96.716	0	1.378	58.1216	25.73	43.649	25.2703	56.7432	127.5	205.838	46.635	55.135	29.405	0	103.608	184.243	90.284	198.486	40.432	56.743	62.946	202.622	107.973	144.5	208.824	86.838	183.554	137.608	137.608	139.446	124.973	104.297	163.568
0.75	39.973	139.216	39.284	47.095	36.986	0.9189	100.851	30.784	16.7703	90.973	100.622	39.973	65.9324	86.608	80.176	36.297	97.405	0	1.378	58.5811	24.581	44.108	24.3514	53.9865	119.23	207.676	47.784	56.284	29.405	0	99.932	182.635	87.757	194.122	41.811	54.216	54.216	200.095	102.689	139.216	204.459	85	182.865	138.757	138.757	142.203	123.365	99.473	162.419
0.7594	39.5135	139.676	38.135	46.865	36.757	0.2297	98.095	27.108	15.6216	91.203	93.959	36.297	62.9459	90.514	84.081	40.203	100.392	0	1.608	57.8919	24.811	46.865	22.5135	53.7568	116.014	209.973	49.622	57.662	27.568	0	99.473	179.649	80.405	196.419	40.432	53.527	50.541	198.486	96.257	133.473	204.689	87.527	186.77	133.243	133.243	140.595	119.919	102.23	163.568
0.7687	39.7432	136.459	39.054	45.486	36.297	0	100.622	25.041	17	90.514	97.176	33.081	63.4054	93.73	80.405	40.432	101.081	0	1.378	54.9054	25.27	47.554	25.5	53.7568	113.486	206.986	49.851	56.743	26.419	0	97.405	170.689	79.027	192.743	39.284	52.149	47.095	196.649	90.054	132.324	201.473	85	189.757	131.405	131.405	139.216	120.378	99.473	161.5
0.7781	39.2838	136.689	40.662	48.703	35.608	0	103.149	20.905	17.4595	92.811	96.946	32.162	63.8649	96.486	82.243	41.811	102.23	0	1.149	56.0541	26.419	45.946	24.8108	52.6081	107.514	207.446	50.77	58.581	23.203	0	92.811	170	73.284	190.676	39.973	53.068	50.081	195.73	83.162	129.568	198.486	79.027	191.365	127.27	127.27	136.919	120.378	98.324	160.122
0.7875	38.8243	135.77	43.419	49.392	35.378	0	99.014	20.905	19.0676	92.811	98.784	34.689	65.0135	97.405	84.541	42.041	97.405	0	1.838	53.527	26.189	44.338	25.0405	53.9865	103.378	205.608	50.77	53.527	20.905	0	89.595	171.608	73.973	186.541	40.662	48.243	50.081	195.73	77.189	129.568	194.122	76.959	192.973	120.149	120.149	137.838	118.77	94.878	155.297
0.7969	37.4459	133.473	42.959	51.23	35.838	0	97.176	19.527	18.6081	88.216	93.5	32.162	64.3243	93.5	84.541	47.784	95.797	0	1.838	52.8378	27.797	39.973	26.4189	53.2973	101.081	206.068	47.784	54.446	19.527	0	84.77	167.014	72.365	186.311	40.662	46.865	48.473	192.973	71.905	127.27	186.77	77.419	191.824	119.23	119.23	137.378	115.324	90.743	155.986
0.8062	37.4459	128.189	43.649	52.608	36.068	0	100.851	19.297	21.1351	82.703	87.757	33.77	60.8784	92.581	88.905	45.486	97.176	0	2.068	51.6892	27.568	37.676	24.5811	52.1486	96.716	206.297	49.392	53.757	20.446	0	82.703	163.568	68.919	181.027	42.041	44.797	40.432	185.162	69.378	125.892	186.311	76.27	186.77	119	119	135.77	108.203	86.838	154.838
0.8156	39.973	126.122	44.338	52.838	37.216	0	103.378	17.919	23.6622	79.486	83.851	31.014	62.7162	93.041	85.689	44.568	98.095	0	2.068	52.6081	26.419	29.176	27.1081	49.3919	96.257	203.541	46.865	52.608	18.838	0	80.176	158.973	68.459	181.027	39.514	43.878	39.054	184.014	70.986	121.757	184.473	76.73	184.014	117.392	117.392	135.77	107.743	82.932	154.378
0.825	41.1216	121.297	42.041	54.446	38.595	0.6892	104.527	17	23.2027	78.797	82.243	33.311	62.7162	94.419	88.905	44.568	99.243	0	2.757	50.5405	26.649	30.095	26.6486	46.8649	93.27	201.473	45.946	47.554	18.378	0	83.162	148.865	63.635	182.865	38.824	40.892	36.068	178.73	71.216	119.23	186.541	75.122	183.784	118.541	118.541	130.486	109.122	81.784	153.689
0.8344	38.1351	117.851	41.811	54.905	35.838	0.9189	103.149	16.77	24.3514	79.716	79.257	34.23	64.5541	102.459	86.378	42.959	96.027	0.2297	2.297	51.9189	28.027	33.311	27.5676	44.5676	90.973	200.324	45.257	46.865	17.459	0	84.081	146.797	63.865	180.108	38.365	36.986	31.703	179.419	63.865	116.703	183.554	73.054	185.162	115.095	115.095	129.568	108.432	73.514	153.459
0.8437	39.7432	114.635	42.5	56.054	32.622	0.6892	101.311	17.919	22.0541	79.946	76.959	36.757	62.7162	99.014	90.514	45.257	88.905	0.6892	2.986	51.4595	25.959	33.081	25.5	45.027	84.77	196.419	46.176	45.257	16.77	0	82.473	143.351	57.432	180.338	38.135	36.068	29.405	183.784	61.797	115.784	180.108	69.149	187	112.568	112.568	127.5	108.662	68.689	150.932
0.8531	39.2838	109.122	41.811	55.595	34.689	0.4595	98.324	17	20.9054	79.027	74.892	36.068	65.7027	104.297	92.811	47.784	86.838	0.6892	3.216	51.4595	26.419	31.703	25.9595	44.1081	79.027	192.973	49.851	46.176	18.838	0	77.649	140.595	52.608	178.27	37.905	33.77	32.162	176.892	59.27	110.959	175.743	67.081	188.149	113.486	113.486	130.257	106.595	66.162	148.405
0.8625	40.4324	99.473	43.419	55.824	32.392	0	98.095	17.23	19.0676	77.189	68.23	36.527	66.1622	103.149	90.514	46.865	90.054	0.2297	2.986	48.473	24.351	29.865	26.6486	39.2838	79.486	189.986	49.162	46.635	17.689	0	75.351	134.622	49.162	174.135	37.446	31.703	32.162	173.446	56.743	109.351	177.581	63.635	187	106.824	106.824	130.257	107.973	63.405	144.5
0.8719	37.9054	100.162	42.5	56.743	34	0	99.703	15.622	18.1486	77.419	60.649	39.514	67.0811	105.905	94.419	44.797	93.041	0	2.986	49.1622	23.892	27.568	26.4189	38.3649	77.649	188.149	48.014	45.716	16.541	0	71.905	128.189	45.486	168.851	37.676	31.703	33.081	171.608	48.932	108.662	172.757	65.932	181.486	102.919	102.919	128.878	104.757	62.716	141.973
0.8812	42.0405	97.176	39.743	56.514	36.527	0	99.703	15.622	17.9189	76.73	54.446	41.122	67.7703	105.905	95.797	45.486	95.797	0	2.297	52.1486	24.351	29.176	27.3378	35.1486	80.176	190.446	48.243	45.027	15.851	0	71.905	128.649	44.568	169.541	37.446	28.486	29.405	167.703	42.5	108.432	170.459	62.946	181.027	98.784	98.784	126.581	103.608	62.716	139.216
0.8906	42.0405	89.135	44.108	56.054	35.608	0	99.014	16.311	18.6081	75.581	50.081	42.959	68.6892	105.905	92.351	46.635	102	0	3.216	48.9324	25.27	30.324	28.7162	35.6081	76.5	183.324	46.865	45.486	15.622	0	72.365	130.946	42.041	171.608	37.676	28.027	31.243	166.784	38.365	103.149	167.703	58.581	175.054	95.338	95.338	125.203	100.622	64.324	138.757
0.9	42.9595	81.784	43.649	56.514	36.297	0	92.351	16.541	20.9054	78.108	50.311	40.662	64.7838	102.23	89.365	42.041	104.527	0	3.446	46.8649	25.041	34	28.027	33.0811	73.514	184.473	45.486	43.649	15.392	0	72.824	124.743	40.662	170.23	36.757	25.959	31.473	161.27	37.446	100.392	164.027	59.041	173.905	95.108	95.108	125.432	99.932	64.324	140.824
0.9094	42.5	73.284	42.041	58.351	36.297	0	86.149	17	21.8243	76.041	49.622	42.73	64.3243	103.608	91.432	40.432	102.689	0	4.595	44.5676	25.5	38.824	27.1081	29.8649	72.824	184.243	46.405	44.108	15.392	0	72.824	119.689	37.905	166.324	35.608	23.892	30.095	158.054	34.23	101.081	152.081	54.216	174.824	96.257	96.257	125.203	95.568	62.716	141.284
0.9187	37.4459	70.757	43.649	59.73	35.838	0	83.851	18.608	22.5135	74.432	52.149	41.581	62.7162	101.311	89.595	39.054	103.838	0	5.284	43.8784	21.365	41.581	27.5676	30.0946	70.757	184.243	44.568	43.189	15.162	0	70.986	115.554	38.595	162.419	34.23	24.122	27.797	150.243	31.243	99.473	146.108	51.919	172.527	91.203	91.203	120.838	94.189	59.5	138.068
0.9281	35.6081	68.23	41.122	60.878	36.527	0	83.851	17.689	21.5946	77.419	50.311	41.351	64.5541	109.122	87.527	43.878	103.838	0	5.054	44.5676	21.365	42.041	26.6486	29.1757	69.378	178.27	46.405	43.649	14.703	0	67.77	112.338	38.824	161.959	33.311	23.203	28.486	149.784	31.932	98.324	141.514	51.919	171.378	90.743	90.743	114.176	89.135	56.973	137.838
0.9375	34.6892	63.405	42.27	58.811	35.149	0	84.541	16.77	22.5135	77.649	47.095	41.811	68.2297	107.514	89.595	45.486	104.986	0	4.824	46.4054	22.284	42.5	29.1757	28.9459	69.608	177.351	41.122	42.5	14.473	0	67.541	110.73	36.068	158.973	35.149	20.676	27.108	142.662	32.162	99.014	140.365	50.311	170.919	87.297	87.297	115.095	92.122	54.446	136.459
0.9469	35.1486	55.365	36.986	59.959	33.081	0	82.932	17.23	23.2027	78.797	46.635	40.432	72.1351	106.595	84.541	47.095	105.446	0	3.905	43.6486	20.216	36.986	26.8784	32.3919	70.297	173.905	40.892	42.73	14.703	0	68.459	107.514	32.622	157.135	35.149	17.459	28.946	138.527	29.405	96.486	139.216	45.716	167.243	87.297	87.297	110.27	91.892	52.838	135.311
0.9562	31.7027	48.703	38.365	59.959	32.622	0	81.095	17.689	23.6622	75.122	43.878	39.743	69.6081	105.905	89.135	54.676	100.851	0	4.365	42.5	20.676	34	28.027	30.0946	69.149	172.068	40.892	42.959	14.243	0	67.77	108.432	31.473	154.838	34.919	14.932	28.257	137.378	28.946	94.419	133.014	40.662	169.081	82.703	82.703	107.743	88.446	49.851	131.865
0.9656	32.6216	43.419	38.824	56.743	31.014	0	78.108	16.541	28.027	76.5	40.432	39.514	72.5946	106.135	89.824	50.081	104.297	0	5.284	41.5811	17.919	28.716	26.8784	30.0946	67.311	169.541	43.649	40.662	14.243	0	62.027	107.054	31.014	150.473	33.77	13.095	31.703	135.311	26.649	95.338	128.189	37.676	168.622	82.932	82.932	104.986	86.149	50.541	126.351
0.975	33.5405	37.216	33.77	58.351	28.946	0	74.892	17.919	28.4865	79.486	39.054	42.041	75.8108	105.676	94.649	48.243	107.973	0	5.743	43.6486	20.905	29.405	29.4054	28.9459	64.784	171.608	42.959	37.676	13.095	0	56.054	104.986	30.324	147.486	33.311	11.486	30.554	136.23	25.73	90.054	127.27	38.365	166.095	80.635	80.635	107.743	81.784	45.946	123.365
0.9844	35.3784	33.081	34.689	59.27	31.473	0	73.973	17.689	31.7027	80.865	40.662	40.432	75.5811	100.622	95.568	51.919	106.365	0	5.514	41.5811	21.824	28.027	32.3919	27.5676	63.405	163.797	43.189	38.365	13.324	0	53.527	99.473	30.324	145.419	33.081	8.5	25.959	138.527	23.892	88.216	122.216	39.514	167.473	76.041	76.041	105.905	79.946	42.73	121.986
0.9937	34.2297	25.27	32.392	61.568	30.554	0.2297	72.135	17.919	33.0811	78.797	36.986	37.446	79.2568	108.662	94.649	53.068	104.068	0	5.284	38.3649	22.973	31.473	33.3108	28.2568	62.257	158.054	41.581	39.973	12.635	0	49.392	95.338	27.797	146.108	32.162	5.514	24.122	137.149	23.662	86.608	118.77	40.662	165.176	75.811	75.811	102.919	78.568	42.041	122.216
1.0031	29.1757	24.811	33.081	57.203	33.77	0.6892	68.23	16.541	34.9189	76.27	33.77	39.284	81.7838	107.054	98.324	56.054	98.784	0	5.284	38.1351	22.514	30.324	35.8378	28.4865	62.257	153.689	43.189	37.446	13.784	0	47.554	92.122	28.257	144.5	31.473	5.284	27.568	132.324	18.378	82.473	120.149	39.743	158.514	75.581	75.581	99.932	78.568	41.811	121.297
1.0125	28.9459	25.041	37.446	60.419	35.149	0.6892	68.919	17.23	35.1486	74.203	33.081	42.5	76.7297	107.743	97.405	54.905	105.676	0	5.054	39.7432	22.973	32.162	35.1486	29.6351	61.338	150.473	44.108	36.986	13.784	0	49.851	94.189	28.946	143.811	31.473	3.676	26.419	126.581	16.77	80.405	115.324	40.662	157.824	76.27	76.27	99.243	78.108	38.365	121.527
1.0219	26.1892	24.351	36.986	60.649	35.608	0.6892	67.081	15.392	36.0676	71.676	33.081	40.892	79.7162	103.608	105.446	52.378	107.514	0	5.054	39.973	22.054	29.865	35.3784	31.2432	62.257	145.419	42.27	36.068	14.243	0	49.622	93.73	27.108	143.811	31.243	3.905	24.811	127.959	15.622	77.419	109.811	40.892	157.595	74.892	74.892	97.635	77.649	34.689	119.919
1.0312	25.2703	24.581	34.459	66.162	35.149	0.6892	60.649	16.541	36.0676	69.149	34.919	41.351	80.6351	103.378	105.216	50.77	112.568	0.6892	4.824	40.4324	22.054	29.865	38.3649	30.7838	61.797	142.203	43.189	34.689	14.473	0	48.473	91.432	24.581	140.824	31.243	3.446	25.73	127.27	12.865	73.284	109.581	42.27	157.595	73.284	73.284	91.892	77.419	33.541	122.446
1.0406	27.7973	22.973	33.311	66.392	33.311	0.4595	60.649	15.622	34.4595	64.324	34.459	39.514	84.3108	101.77	102.23	55.595	112.108	1.3784	4.824	38.8243	23.432	27.568	40.2027	30.5541	59.27	141.743	43.878	32.851	15.162	0	45.257	93.5	22.514	142.892	31.473	3.676	28.257	123.824	14.243	70.297	108.662	40.892	154.608	76.5	76.5	91.662	78.338	31.243	122.216
1.05	25.7297	20.676	31.932	63.635	31.703	0	62.716	15.162	37.2162	64.554	34.23	41.351	85.4595	99.014	103.149	56.284	112.338	1.6081	5.973	39.5135	22.054	27.338	43.1892	29.8649	57.203	135.541	44.108	31.932	15.851	0	47.324	93.5	21.595	144.041	32.162	2.757	26.878	116.243	14.473	70.068	103.378	41.581	154.838	75.122	75.122	89.595	80.635	30.554	122.676
1.0594	23.8919	19.068	32.851	62.946	33.77	0	62.716	15.162	36.9865	67.77	37.676	43.419	80.8649	98.784	105.676	56.514	111.189	0.6892	5.284	39.2838	23.432	29.176	41.5811	29.6351	60.419	138.068	41.122	29.405	15.162	0	47.324	91.892	20.676	142.432	31.932	2.068	28.716	119	14.473	68.23	102	42.27	153.459	73.743	73.743	87.297	78.568	29.635	118.77
1.0687	22.0541	17.459	31.703	62.716	33.081	0	60.649	16.311	36.0676	64.784	36.068	44.797	82.7027	96.486	103.838	58.811	111.419	0	5.054	37.2162	22.284	28.257	40.8919	30.3243	57.662	138.297	41.122	29.865	14.932	0	44.108	90.054	18.838	140.135	31.932	1.378	28.486	114.405	14.932	70.068	99.243	41.581	151.392	75.351	75.351	82.014	75.122	28.486	116.014
1.0781	19.9865	15.162	29.405	65.473	28.257	0	57.892	15.851	37.4459	63.176	40.203	46.635	83.3919	98.324	102.919	57.892	106.824	0	5.514	39.7432	21.824	27.108	44.5676	28.027	57.432	140.824	41.811	28.716	14.932	0	43.419	88.446	17.689	136.919	30.554	2.068	30.324	111.419	15.162	66.162	96.486	40.203	150.932	73.514	73.514	86.149	73.973	27.797	114.635
1.0875	21.8243	11.486	25.5	66.392	29.176	0	59.041	15.622	35.6081	63.865	38.365	45.257	84.5405	101.311	102.919	59.73	107.284	0	5.743	37.4459	22.514	26.878	44.5676	28.027	56.284	136.23	42.041	29.865	14.703	0	41.351	82.243	18.608	136.919	29.405	2.757	30.095	109.351	14.473	64.095	93.041	37.676	153.689	72.365	72.365	87.068	72.595	28.486	116.243
1.0969	21.8243	9.649	24.351	68.919	26.649	0.2297	60.419	17.919	36.2973	61.797	36.068	44.108	84.0811	104.068	98.095	55.135	111.419	0	5.284	38.3649	20.446	27.568	43.6486	27.5676	56.514	136.23	41.811	31.014	14.932	0	39.743	80.405	17.23	131.405	27.797	2.757	28.716	106.135	12.635	63.865	90.284	37.446	154.608	69.149	69.149	85.459	73.514	28.486	115.784
1.1062	22.2838	8.959	20.676	70.986	29.176	1.3784	58.351	18.838	36.2973	62.716	36.297	43.878	85	101.541	106.824	57.203	112.568	0.4595	5.284	40.6622	17.689	24.351	42.0405	27.3378	55.135	130.027	43.878	31.014	14.014	0	39.514	77.419	15.392	128.878	25.73	3.446	27.108	105.905	11.257	62.716	86.149	35.608	154.378	69.378	69.378	87.757	72.595	28.027	114.405
1.1156	21.3649	9.419	19.527	68.23	30.095	1.3784	55.135	17.459	35.1486	59.73	35.378	46.176	84.0811	97.176	100.851	61.108	111.189	0.4595	5.054	38.8243	16.081	19.986	40.8919	27.5676	56.514	124.514	44.108	29.635	14.014	0	38.595	74.203	13.095	126.811	25.959	2.297	26.878	104.297	9.878	61.797	82.014	34.23	155.297	68.919	68.919	88.446	70.068	23.662	114.176
1.125	21.8243	9.419	19.527	70.527	31.703	2.0676	56.054	16.77	35.8378	57.203	35.608	45.946	85.6892	94.878	103.608	58.581	109.122	0.4595	5.054	41.5811	18.838	21.135	41.3514	28.4865	55.365	119	46.405	28.257	13.784	0	36.527	71.216	12.176	125.203	25.041	1.149	27.797	102.689	7.811	59.5	83.851	33.311	153.459	70.527	70.527	84.311	73.054	21.135	113.257
1.1344	18.8378	8.5	20.676	77.189	32.851	1.1486	54.216	15.851	33.0811	53.986	35.838	44.338	85	95.797	104.757	63.405	110.041	0.4595	4.824	44.3378	18.608	20.216	42.2703	28.4865	55.365	114.635	43.878	28.716	12.635	0	34.23	70.297	12.176	122.216	25.27	0.919	27.797	98.324	7.351	60.419	80.405	31.703	152.541	72.824	72.824	83.392	71.216	17.919	109.581
1.1437	18.1486	7.811	23.432	81.324	30.324	0.4595	53.757	17.23	31.0135	56.284	35.838	47.324	83.1622	96.716	107.284	62.027	110.5	0	5.054	42.9595	18.838	20.216	41.3514	28.2568	56.743	110.73	40.892	29.176	12.405	0	32.622	70.527	11.486	121.757	26.649	0.919	27.797	99.703	7.351	57.892	81.324	33.081	151.851	71.216	71.216	80.865	72.365	14.932	110.27
1.1531	17.6892	6.662	22.284	87.527	33.081	0.2297	53.297	17.23	29.6351	53.068	36.068	48.703	89.1351	97.635	103.378	63.635	112.338	0	5.054	42.9595	17	21.824	38.8243	27.7973	54.676	107.973	39.514	30.554	10.797	0	29.865	67.77	10.568	122.676	25.73	1.378	26.189	103.149	3.676	58.811	79.257	27.338	150.014	72.595	72.595	76.73	69.378	10.338	108.203
1.1625	17.9189	6.892	21.595	87.297	30.324	0.2297	53.297	18.149	30.7838	50.081	34	53.986	89.8243	96.257	102.919	61.108	112.797	0	6.203	45.2568	17.919	22.284	37.6757	26.8784	55.365	105.216	36.986	29.405	10.108	0	32.622	65.932	9.878	120.149	25.73	1.149	27.108	98.095	3.676	55.824	81.095	25.959	147.257	73.973	73.973	75.122	67.311	7.351	106.824
1.1719	19.0676	5.514	19.297	91.662	33.081	0.4595	53.068	17.689	31.0135	49.851	32.622	52.378	88.9054	96.257	98.554	63.176	114.405	0	5.514	46.1757	17.689	22.284	41.8108	29.6351	54.676	102.919	37.216	27.108	10.568	0	34.23	62.027	9.649	120.378	24.581	1.149	27.568	101.311	4.135	52.149	79.946	28.027	147.716	71.905	71.905	76.041	66.851	5.054	104.068
1.1812	19.0676	4.135	16.77	92.351	33.541	0.2297	50.541	17.689	31.473	51.23	31.243	56.284	88.4459	96.257	98.784	60.189	112.568	0	5.973	45.2568	19.986	24.351	44.1081	29.8649	54.446	101.541	35.608	27.108	10.568	0	33.541	59.959	9.189	114.865	22.973	1.608	28.257	99.014	3.446	48.014	78.338	26.419	146.797	70.986	70.986	70.527	63.405	4.595	100.622
1.1906	17.2297	3.676	16.311	98.324	33.77	0.6892	49.851	18.838	29.6351	50.77	32.392	54.216	83.6216	90.284	100.392	66.162	113.716	0	6.662	47.5541	17.23	24.811	42.7297	27.7973	51.459	94.878	36.297	27.568	10.108	0	31.703	60.189	9.419	110.27	21.365	2.527	30.095	95.797	2.986	46.635	78.338	24.811	143.581	69.608	69.608	67.311	65.703	3.905	98.554
1.2	19.2973	2.757	16.541	100.162	32.392	1.1486	48.473	17.919	28.9459	50.311	31.703	55.595	85	89.595	99.703	62.257	113.946	0	6.432	43.4189	15.392	26.649	39.2838	26.6486	45.486	91.432	34.23	30.554	9.419	0	31.014	58.122	9.419	110.959	19.527	3.216	28.946	89.824	2.757	42.041	75.122	24.811	141.514	73.743	73.743	67.541	66.622	3.446	98.095
1.2094	20.4459	4.135	15.392	101.311	32.162	1.3784	44.797	18.378	29.8649	47.324	32.622	58.811	82.9324	86.838	103.378	61.338	113.946	0	6.432	40.6622	16.311	28.257	38.1351	23.6622	45.486	89.824	31.932	30.095	9.419	0	29.865	55.595	10.108	107.284	18.608	4.595	27.568	89.595	2.986	37.905	75.811	24.811	139.216	74.432	74.432	66.851	68	3.676	96.946
1.2187	19.2973	5.284	16.081	97.635	32.392	2.7568	43.649	17.919	30.3243	47.324	30.554	62.027	81.5541	83.622	104.986	65.014	112.338	0	6.432	40.4324	16.311	28.027	36.9865	24.8108	46.405	91.892	31.473	30.095	8.27	0	31.014	52.838	9.189	108.892	16.541	4.824	24.581	90.054	2.986	36.527	73.054	25.041	137.149	73.054	73.054	64.324	64.095	1.608	98.095
1.2281	19.2973	4.595	18.149	100.851	32.851	4.8243	41.122	18.838	32.8514	47.784	27.797	62.027	82.0135	83.622	101.541	62.716	112.108	0	7.122	42.2703	15.162	26.419	37.6757	26.6486	44.108	91.432	30.554	29.635	8.959	0	31.932	46.635	7.811	105.905	15.392	6.203	24.122	93.73	2.986	35.608	73.973	25.959	137.149	73.054	73.054	61.568	60.878	1.149	97.176
1.2375	20.2162	4.365	19.527	98.554	32.162	8.2703	43.419	18.608	32.1622	45.716	27.568	62.257	82.2432	80.176	103.378	63.405	111.649	0	6.432	42.9595	14.932	26.419	39.0541	28.2568	45.716	90.054	29.635	28.716	8.5	0	35.378	43.878	5.973	104.297	15.162	5.973	22.284	94.878	4.135	35.378	72.365	27.568	140.135	71.905	71.905	62.716	59.5	1.608	93.27
1.2469	22.0541	3.676	18.378	97.405	32.392	10.1081	40.662	17.689	30.7838	45.027	26.189	59.041	82.9324	76.959	104.297	64.554	104.297	0	5.284	47.0946	11.946	25.5	39.2838	28.7162	44.568	85.689	28.486	28.716	8.5	0	32.392	45.486	3.446	103.149	13.784	5.743	22.054	89.135	4.595	34.23	72.824	26.419	138.297	71.905	71.905	62.946	60.189	0.689	92.351
1.2562	22.0541	1.378	16.541	99.932	29.405	11.9459	40.432	18.149	31.7027	42.73	27.797	57.432	80.1757	76.27	103.149	62.946	101.77	0	5.284	47.3243	14.014	22.743	37.9054	30.7838	43.649	80.176	27.568	28.486	8.27	0	32.162	42.73	2.986	98.554	11.027	5.054	23.203	84.77	2.527	33.081	71.905	28.027	136.459	71.905	71.905	62.946	56.054	1.608	93.959
1.2656	19.9865	0	16.311	101.541	28.257	12.4054	40.892	19.527	31.9324	42.27	25.959	61.568	79.027	76.041	102.459	61.338	107.514	0	5.284	44.5676	14.014	22.514	33.7703	30.5541	40.432	76.041	25.27	26.878	8.5	0	30.324	43.649	1.378	96.716	8.73	4.595	23.203	83.851	2.068	29.865	70.297	28.486	132.784	70.297	70.297	62.027	56.514	1.378	92.351
1.275	21.8243	0	17.23	102	25.959	13.5541	44.568	18.838	34	40.662	25.5	57.892	76.9595	76.73	98.324	63.635	110.5	0	6.432	45.4865	15.392	22.514	35.8378	30.5541	38.595	73.054	23.203	26.189	8.27	0	28.946	43.189	2.068	94.878	7.351	3.676	23.432	87.757	2.757	31.703	68	23.662	130.716	70.068	70.068	60.189	56.054	1.378	91.432
1.2843	22.2838	0.23	16.081	97.176	25.041	17.2297	41.351	20.216	34.6892	41.122	25.73	54.216	75.3513	76.5	99.932	62.716	116.014	0	4.824	41.5811	14.014	22.973	37.4459	29.6351	33.541	69.378	20.216	25.5	7.581	0	28.257	41.351	3.905	96.027	7.122	3.446	22.054	85.23	2.068	37.676	68	21.365	127.5	69.149	69.149	59.959	55.595	1.838	89.595
1.2937	22.973	0	17.459	92.351	26.189	19.0676	41.122	21.135	35.3784	39.514	29.635	55.824	76.5	74.203	95.338	60.878	117.162	0	5.054	43.1892	15.622	20.905	39.0541	30.7838	34.459	64.324	20.216	24.811	7.581	0	27.108	38.824	6.432	93.73	5.743	5.284	21.824	85.23	2.527	38.365	65.243	19.527	127.73	67.081	67.081	56.743	57.662	1.838	87.986
1.3031	21.5946	0	16.541	95.108	25.73	22.0541	39.054	19.527	36.9865	41.351	28.257	54.446	77.1892	71.905	91.892	57.203	120.149	0.4595	4.365	42.9595	13.784	23.203	41.8108	30.5541	33.311	65.243	18.838	24.811	6.892	0	29.176	38.365	5.514	89.824	4.135	6.203	20.676	82.703	3.216	39.514	62.486	17.689	125.892	63.635	63.635	55.365	56.973	3.216	89.365
1.3125	19.9865	0.689	19.527	94.649	27.568	26.6486	34.919	20.905	41.5811	40.203	28.716	55.135	73.2838	71.446	87.068	59.73	118.081	0.4595	5.054	44.7973	15.851	26.189	45.9459	29.8649	32.622	59.041	17.919	25.041	6.892	0	28.257	36.757	5.054	86.838	4.824	5.743	20.446	78.568	2.297	39.284	60.878	16.77	124.284	62.716	62.716	55.365	56.973	3.676	87.068
1.3218	19.0676	0	20.216	96.946	28.027	28.027	35.149	21.595	41.8108	41.581	30.095	53.068	69.8378	66.392	88.446	60.878	115.324	0.2297	5.054	48.473	16.77	25.959	50.3108	28.7162	31.014	57.432	19.068	26.189	6.892	0	27.797	35.149	5.743	82.932	4.824	4.824	19.757	78.568	1.838	36.986	62.946	15.392	120.608	60.419	60.419	53.757	61.108	3.676	89.135
1.3312	19.0676	0.689	19.068	93.27	28.946	32.8514	37.216	21.135	42.2703	41.581	28.486	54.905	65.9324	67.081	88.446	58.811	114.176	0.2297	5.973	51	18.378	25.959	48.7027	26.1892	33.541	52.378	19.068	26.649	6.892	0	25.959	36.297	3.905	79.257	4.135	4.595	18.838	76.5	1.149	32.162	65.703	14.932	122.216	60.649	60.649	52.149	60.878	3.676	87.527
1.3406	18.1486	0.689	19.757	96.716	28.486	33.7703	40.892	20.446	39.5135	41.351	27.338	51	63.8649	67.311	89.595	65.473	111.649	0.2297	6.203	53.9865	16.311	26.878	48.9324	26.4189	34.23	49.162	20.446	25.5	6.662	0	28.027	33.311	2.297	77.419	5.284	4.595	17.459	76.27	2.297	32.162	65.703	14.932	119.23	60.878	60.878	51.23	58.122	2.297	87.757
1.35	18.8378	0	17.23	96.486	27.568	33.7703	37.676	21.365	38.1351	39.743	28.027	53.068	61.5676	65.703	85	68.459	116.014	0	5.054	52.3784	15.622	27.338	48.473	27.1081	33.541	48.473	18.838	26.649	6.203	0	29.865	30.324	2.068	75.581	3.676	3.216	16.081	73.973	2.068	31.014	65.014	14.473	114.635	58.122	58.122	51	57.892	1.378	85.459
1.3593	18.8378	0.459	17.23	96.716	25.27	36.0676	37.905	19.986	40.6622	40.432	30.554	55.365	62.4865	66.162	87.068	70.986	113.257	0	5.284	51.6892	18.378	28.946	50.7703	25.2703	32.622	49.392	18.838	22.973	6.203	0	29.176	28.716	2.986	75.581	3.676	3.446	14.473	66.392	2.068	27.568	64.554	14.473	112.108	57.203	57.203	50.311	55.824	0.919	82.703
1.3687	17.4595	0.459	17.459	97.405	26.878	39.7432	37.905	21.365	41.1216	39.514	32.162	57.203	59.5	68.23	89.595	71.905	111.189	0	3.676	51	17	27.797	47.0946	25.7297	32.622	50.77	16.541	23.432	6.662	0	27.568	29.176	3.905	74.203	4.595	5.284	13.095	61.108	1.838	26.189	67.77	15.622	110.5	55.824	55.824	50.311	53.297	2.068	83.851
1.3781	17	0	19.986	100.392	26.419	38.5946	37.216	21.824	42.2703	37.905	34.459	54.216	57.4324	64.324	89.365	74.892	110.959	0	2.297	50.0811	17.23	26.419	42.5	26.6486	31.932	50.77	16.541	23.432	6.662	0	27.338	27.108	5.284	74.432	2.757	4.135	12.865	60.189	1.838	25.27	67.081	15.622	110.041	53.986	53.986	50.77	52.838	3.446	80.405
1.3875	15.6216	0	17.919	96.716	29.635	41.3514	37.216	20.216	42.0405	35.378	33.541	53.527	55.5946	62.257	92.122	74.892	116.014	0	1.838	50.5405	17.689	25.041	43.8784	25.5	31.932	48.932	18.378	23.203	6.203	0	26.649	25.5	5.514	74.203	2.068	3.216	12.176	62.027	1.378	24.811	64.095	17	108.432	52.378	52.378	51.919	49.162	3.446	78.797
1.3968	14.473	0.23	16.541	98.784	29.865	38.1351	37.446	19.986	40.4324	35.378	32.622	52.149	53.0676	60.878	94.419	73.054	113.946	0	1.378	51	18.149	27.108	45.7162	24.3514	31.932	46.176	17.689	24.122	6.203	0	25.5	25.27	4.595	70.527	0.919	3.216	11.027	59.041	1.608	22.054	62.486	13.784	108.203	50.77	50.77	51.689	47.095	1.838	76.959
1.4062	12.8649	0.689	17.689	100.851	32.851	35.8378	38.824	19.527	39.5135	36.297	32.622	52.838	48.0135	58.122	90.743	74.662	113.257	0	0.689	56.2838	17.23	26.419	46.6351	24.5811	32.851	41.581	17	23.662	5.973	0	25.5	23.892	2.757	67.311	1.149	2.527	10.338	61.108	1.608	20.676	58.351	12.865	107.743	47.784	47.784	48.703	45.257	0.919	75.351
1.4156	13.3243	0.689	18.149	104.986	35.149	36.2973	38.135	18.838	40.4324	33.081	32.392	49.622	50.5405	56.284	95.568	79.716	117.162	0	0.689	56.7432	17	26.649	48.473	23.2027	32.392	42.5	17.23	23.892	5.973	0	24.581	23.203	2.757	65.473	1.838	1.608	10.338	57.892	2.068	20.216	60.878	10.568	102	47.324	47.324	46.176	43.419	0.459	70.527
1.425	13.0946	1.149	14.932	107.054	34.689	34.2297	35.608	17.459	39.973	35.149	34.23	49.622	50.3108	53.986	89.824	84.541	114.405	0	0.919	55.8243	18.378	27.568	46.4054	21.1351	31.014	41.351	18.608	23.662	6.203	0	25.27	22.284	2.297	61.338	1.378	1.149	9.649	55.824	3.216	21.135	60.189	9.878	100.162	45.486	45.486	48.243	40.662	0.23	71.676
1.4343	13.5541	0.919	16.081	100.851	31.703	35.8378	34.689	20.216	40.6622	33.081	36.297	48.014	50.3108	51.919	88.905	84.311	113.027	0	0.689	51.2297	19.297	25.959	49.1622	21.3649	31.473	38.824	18.378	22.054	5.743	0	26.189	19.527	1.838	59.5	0.919	0.689	8.959	54.446	3.216	19.757	59.5	6.432	100.851	45.257	45.257	47.784	37.446	0	70.297
1.4437	14.2432	0.459	14.703	103.608	32.851	34.6892	34.459	19.527	40.6622	31.473	36.527	48.243	48.2432	48.243	86.608	83.162	111.878	0	0.23	52.3784	21.135	25.73	50.7703	20.9054	31.243	34.689	16.081	20.216	5.514	0	22.743	17.919	2.297	59.5	0.919	0.459	8.5	52.608	3.446	18.608	56.973	6.662	98.095	44.108	44.108	48.473	36.527	0	71.905
1.4531	16.5405	0.689	15.392	109.811	34.459	35.6081	34.919	18.608	40.8919	29.865	37.905	46.176	45.4865	48.243	89.365	84.081	112.568	0.2297	0	50.5405	22.973	26.419	48.7027	19.527	28.257	32.392	15.162	20.446	5.973	0	24.581	17.23	2.068	59.041	0.689	0.459	8.041	49.392	2.297	18.608	53.757	7.811	97.865	42.73	42.73	50.081	34.919	0	70.527
1.4625	17.2297	0.23	14.473	108.203	34.689	39.0541	34.919	17	40.8919	29.865	35.608	45.027	45.027	50.541	92.122	89.365	114.635	1.1486	0.23	51.4595	23.432	25.73	48.9324	18.1486	26.649	31.243	14.014	19.297	5.973	0	25.959	14.932	2.527	55.595	1.149	0.689	8.73	49.162	1.838	18.149	51.689	8.041	95.797	40.203	40.203	46.635	32.622	0.23	70.527
1.4718	18.1486	0.23	14.473	108.662	34.23	40.4324	34.459	17.23	39.2838	29.176	38.824	44.338	43.1892	48.703	85.23	91.432	114.865	1.3784	0.689	50.5405	24.351	25.959	53.2973	18.1486	26.649	29.635	13.554	19.297	5.743	0	25.5	14.014	5.284	51.23	1.378	0.919	9.189	48.014	2.068	16.081	52.378	7.122	93.041	40.662	40.662	45.946	32.162	0.23	67.77
1.4812	18.1486	0	15.622	105.446	34	38.3649	34.459	18.149	39.7432	27.797	39.054	42.73	42.2703	46.865	87.297	94.419	113.486	2.0676	0.689	51.2297	25.73	24.351	56.973	18.1486	25.959	27.108	11.946	17.689	5.743	0	25.27	13.784	5.054	46.635	0.919	0	8.5	46.865	2.527	16.311	52.149	5.973	88.676	39.284	39.284	42.27	31.703	0.23	64.554
1.4906	21.3649	0.459	17.23	106.365	34	43.4189	36.986	17.23	42.9595	29.176	41.811	44.568	36.527	44.108	87.527	97.635	114.176	2.7568	1.378	48.9324	22.284	25.041	55.8243	17	25.5	26.419	10.568	14.243	5.743	0	24.122	12.635	4.824	45.486	0.23	0	8.27	50.541	2.527	16.541	50.77	5.284	85.459	37.905	37.905	40.662	31.703	0.23	62.946
1.5	21.5946	0.689	18.378	107.514	32.162	43.6486	37.676	18.378	43.1892	27.338	41.122	43.189	32.6216	40.892	90.284	94.419	112.568	3.9054	2.297	48.9324	21.365	25.959	53.527	18.6081	26.878	23.892	8.959	15.851	5.284	0	26.419	10.108	4.595	41.811	0	0.459	8.959	53.757	2.297	16.541	50.311	4.595	85.459	34.459	34.459	40.892	29.635	0	62.257
1.5093	21.1351	0	17.23	106.135	32.622	42.7297	33.77	19.068	42.9595	27.108	43.878	42.959	32.8514	40.203	86.378	100.851	107.973	4.3649	3.216	47.3243	19.527	22.973	54.6757	17.9189	25.73	21.824	7.122	14.932	5.284	0	25.73	8.5	3.676	40.203	0	0.919	8.73	58.351	2.527	15.392	52.838	4.365	88.676	33.081	33.081	37.905	28.257	0	61.797
1.5187	17.6892	0	16.311	108.892	31.014	44.7973	34.23	17	45.7162	28.716	43.189	41.581	31.473	39.973	85.919	106.595	110.73	5.7432	3.446	51.6892	20.676	23.203	56.5135	17.2297	23.203	19.757	7.122	15.622	4.824	0	23.203	8.959	3.676	39.514	0	1.378	6.892	52.149	2.527	14.932	53.986	3.676	87.297	33.541	33.541	36.757	25.959	0.23	62.027
1.5281	16.5405	0	15.851	107.054	30.554	43.6486	34.459	15.622	45.2568	27.108	40.203	39.743	31.0135	38.824	86.608	111.649	106.365	6.6622	4.595	50.3108	19.757	23.662	59.5	17.9189	23.432	18.608	4.824	14.473	4.365	0	22.743	7.811	3.676	38.365	0	1.608	6.662	49.851	2.297	13.784	53.527	3.676	87.986	34.23	34.23	35.608	25.5	0.459	59.959
1.5375	17.4595	0	15.162	106.595	33.77	42.5	33.081	16.311	44.7973	26.649	41.351	39.054	28.027	40.432	87.757	111.189	105.216	6.6622	5.743	48.7027	19.527	22.973	59.9595	16.7703	21.365	18.149	2.757	13.554	4.365	0	23.203	7.581	2.068	34	0	0.689	7.122	47.324	2.297	13.095	54.676	3.446	86.608	33.541	33.541	35.149	21.824	0.23	60.649
1.5468	19.9865	0	15.851	109.122	34.689	39.0541	33.541	16.081	46.4054	26.189	41.811	39.514	28.2568	40.662	95.108	115.324	105.676	6.8919	6.432	46.8649	20.446	23.203	60.6486	16.0811	21.595	17.459	2.527	13.554	4.595	0	22.743	6.432	1.838	33.541	0	0.23	7.122	45.716	1.378	12.865	52.608	3.216	85.23	32.851	32.851	34.459	19.527	0.23	60.649
1.5562	20.2162	0.23	15.162	107.514	33.77	42.0405	34.459	15.622	46.6351	25.5	41.811	39.743	28.9459	40.203	92.122	116.473	105.905	6.6622	5.514	48.473	22.743	22.514	60.8784	18.6081	20.446	14.243	2.527	12.865	4.595	0	20.446	6.203	2.757	34.459	0	0	5.284	43.878	1.149	11.486	52.838	3.446	77.649	30.554	30.554	34.23	16.541	0	59.73
1.5656	22.0541	0.23	14.703	105.905	32.622	38.3649	34	15.851	47.7838	24.811	44.338	38.135	29.8649	41.122	94.419	115.324	105.446	6.4324	5.743	53.7568	23.662	22.514	60.6486	19.0676	19.527	14.243	1.608	12.865	4.365	0	19.068	5.973	2.757	36.068	0	0	5.054	43.189	1.149	12.405	57.892	2.986	78.797	32.162	32.162	33.541	15.392	0	60.189
1.575	21.8243	0.23	14.473	104.986	34.689	37.9054	32.622	15.622	46.1757	24.351	45.257	38.365	27.1081	39.973	98.095	116.703	104.297	6.8919	5.743	58.5811	24.581	21.595	62.9459	21.3649	18.838	13.095	2.297	13.554	3.676	0	19.068	5.743	1.378	35.838	0	0.689	5.743	43.419	0.919	12.635	53.757	2.757	76.959	30.324	30.324	32.851	13.324	0.23	61.338
1.5843	20.2162	0.23	13.324	99.932	34.919	36.9865	32.851	16.77	48.473	23.203	44.338	35.149	28.4865	40.662	96.716	114.176	104.297	7.3514	4.824	63.1757	27.338	22.284	62.4865	21.3649	19.297	13.784	0.919	14.014	3.676	0	19.757	5.054	0.919	33.541	0	1.378	4.365	48.703	1.149	11.946	55.365	2.297	71.216	28.946	28.946	32.392	12.405	0.459	64.324
1.5937	18.1486	0.23	14.473	100.162	34.919	36.7568	31.703	17.919	50.3108	20.216	42.73	31.243	27.5676	40.892	97.176	114.865	101.541	7.5811	5.514	62.2568	28.257	22.054	65.473	21.1351	17.919	12.405	0.23	13.095	3.676	0	18.149	4.595	0.459	31.932	0	0.919	5.284	48.703	1.149	13.784	56.973	2.068	67.541	30.784	30.784	30.554	12.635	0.459	64.095
1.6031	17	0	15.392	99.932	34.459	35.3784	30.095	17	51.6892	19.068	42.041	31.932	26.1892	38.824	99.703	116.473	103.838	7.3514	5.973	60.6486	30.554	23.662	66.6216	20.4459	17.23	12.405	0	13.324	3.446	0	19.068	4.824	0.459	28.946	0	0.919	5.054	44.338	1.149	13.784	55.365	2.297	62.946	30.554	30.554	28.486	11.946	0.459	63.176
1.6125	18.1486	0.23	15.162	100.851	31.703	33.7703	29.635	17.459	51.6892	17.919	44.797	33.541	25.7297	39.054	101.311	115.554	103.149	7.8108	6.892	62.027	32.392	24.122	65.0135	21.8243	16.311	11.716	0	12.865	3.446	0	18.838	4.365	0.919	27.568	0	0.459	4.824	44.108	0	13.324	55.135	1.838	61.338	31.014	31.014	26.878	11.257	0.459	62.716
1.6218	19.2973	0	14.932	99.703	29.635	33.3108	27.568	16.081	50.5405	16.081	43.878	31.243	24.3514	36.527	98.784	113.716	105.676	7.1216	6.662	60.8784	31.473	24.581	65.0135	20.4459	15.851	8.041	0	12.635	2.986	0	17.23	4.595	0.689	25.27	0	0.459	4.365	44.108	0.23	10.797	51	2.068	56.743	28.486	28.486	26.189	11.716	0.459	63.635
1.6312	18.8378	0	16.311	102.23	29.635	35.8378	26.649	16.081	51.4595	14.243	44.797	31.014	22.2838	33.311	99.014	119	102	6.8919	4.824	60.1892	29.635	22.514	66.3919	21.1351	14.703	6.203	0.689	11.716	2.527	0	17.689	4.595	0	24.581	0	0.459	3.676	45.257	0.459	10.568	48.473	2.068	56.973	29.405	29.405	26.419	10.797	0.919	63.865
1.6406	19.9865	0	16.541	101.77	30.324	33.0811	28.946	15.392	54.2162	11.946	42.041	31.932	20.4459	31.703	95.568	118.311	102.23	7.5811	4.365	64.0946	29.176	18.838	63.8649	20.6757	13.324	5.743	1.378	12.405	2.527	0	18.149	4.365	0	23.892	0	0.689	1.608	42.041	0	11.946	48.473	1.838	51.689	28.486	28.486	24.581	8.959	0.459	63.176
1.65	19.7568	0	14.243	101.081	31.243	30.7838	27.568	14.014	53.527	8.73	43.649	29.635	18.8378	30.095	93.27	119	103.838	8.0405	3.905	68	30.554	18.149	66.3919	20.6757	13.554	3.905	1.149	13.784	2.068	0	17.919	4.595	0	23.662	0	0.689	0.689	40.432	0	11.716	45.946	2.068	51.459	28.716	28.716	25.27	10.108	0.23	61.338
1.6593	18.1486	0	14.473	99.014	31.932	29.6351	27.338	14.014	56.0541	7.811	43.878	29.405	19.7568	28.486	92.122	119	100.392	9.4189	3.676	65.473	31.703	18.608	66.6216	20.2162	13.324	3.676	0.689	12.865	2.068	0	16.77	4.365	0	20.676	0	0.23	0.23	42.73	0	9.878	47.324	2.068	52.838	27.797	27.797	22.973	10.338	0	63.176
1.6687	18.3784	0	15.622	98.784	30.095	26.4189	26.878	13.784	62.9459	6.892	42.5	29.405	19.2973	29.635	95.568	115.095	102.23	11.2568	4.365	69.8378	30.324	18.838	65.9324	18.6081	14.014	3.905	0.23	12.405	2.068	0	18.149	3.446	0.23	19.527	0	0.23	0.23	46.635	0	8.73	49.162	2.068	50.541	28.716	28.716	24.122	9.878	0	61.797
1.6781	18.6081	0	14.473	98.784	29.865	26.4189	26.419	13.095	67.7703	6.203	43.419	28.486	19.2973	29.635	92.811	116.703	103.608	10.5676	5.284	65.2432	31.703	18.838	66.8513	16.7703	12.865	4.135	0.689	10.797	1.838	0	16.081	3.216	1.149	20.216	0	0.689	0.23	45.027	0	7.122	49.622	1.838	48.473	29.176	29.176	22.973	9.649	0.23	62.027
1.6875	19.0676	0	14.703	100.392	32.851	25.0405	26.649	13.784	68.6892	6.662	40.432	25.5	18.6081	28.486	90.973	116.703	104.757	11.4865	4.824	63.4054	28.486	19.068	65.2432	15.6216	13.324	4.824	0.919	11.027	1.378	0	16.541	2.068	1.378	17.689	0	1.149	0.919	42.5	0	8.27	47.095	2.068	45.716	29.405	29.405	23.203	9.419	0.23	60.878
1.6968	19.9865	0	15.162	100.162	31.243	24.5811	25.959	15.162	66.1622	5.284	42.041	26.419	17.6892	27.338	90.973	120.838	105.676	12.4054	4.824	62.7162	28.486	19.527	66.6216	14.473	11.716	3.905	0.23	10.108	1.378	0	15.622	2.757	1.838	17	0	1.608	0.689	40.662	0	7.581	46.635	2.297	42.27	31.473	31.473	23.432	9.878	0	60.419
1.7062	19.527	0	16.541	97.865	30.324	24.8108	24.811	14.473	70.527	4.595	39.514	26.419	17.9189	29.865	94.419	124.054	104.297	11.7162	5.743	62.027	28.027	21.824	65.7027	14.0135	12.635	3.446	0.689	10.108	0.689	0	14.014	2.068	2.986	16.081	0	0.919	0.689	40.892	0	7.581	45.716	2.527	41.122	31.932	31.932	22.973	8.27	0	59.041
1.7156	18.1486	0	18.378	98.784	30.095	25.5	24.351	14.473	72.5946	3.216	39.973	26.419	17.6892	29.176	95.338	123.595	101.081	12.8649	5.054	65.7027	27.568	24.581	63.6351	14.0135	11.486	3.676	0.689	9.189	0.459	0	15.392	1.378	3.676	13.784	0	0.459	0.689	38.595	0	7.122	49.162	2.068	39.743	31.932	31.932	23.432	7.811	0.23	60.189
1.725	19.0676	0	17.919	97.865	28.257	24.8108	23.892	14.473	76.9595	3.446	41.811	25.959	16.7703	29.405	92.581	127.73	103.149	12.4054	4.365	65.7027	29.176	21.595	63.1757	13.7838	11.486	2.757	0.689	9.649	0.23	0	16.081	0.919	3.216	13.784	0	0	0.23	39.514	0	6.203	45.946	2.068	40.432	32.622	32.622	23.892	5.973	0.23	60.878
1.7343	19.2973	0	17.689	99.014	26.419	26.8784	25.041	15.162	78.7973	3.216	43.878	24.581	16.3108	28.027	91.662	126.122	97.405	11.027	5.054	62.4865	26.189	16.541	64.0946	14.2432	10.108	2.068	0.23	10.797	0	0	15.392	0.919	3.905	11.486	0	0	0	38.824	0	5.284	47.784	2.297	35.149	31.932	31.932	25.27	3.905	0.23	63.865
1.7437	18.8378	0	18.378	98.324	22.054	25.2703	23.432	16.311	79.7162	2.527	45.946	24.122	16.0811	29.405	92.811	129.797	98.784	10.5676	5.284	58.5811	30.095	14.703	65.0135	13.7838	8.73	1.838	0	11.027	0	0	15.622	0.689	3.905	9.649	0	0	0	34.459	0	4.595	48.703	1.149	32.622	32.622	32.622	23.892	3.676	0	62.486
1.7531	19.0676	0	17.23	97.405	22.054	23.6622	23.432	16.77	80.1757	1.838	42.959	22.973	14.0135	25.73	91.203	128.189	96.946	9.4189	5.973	60.1892	31.473	14.932	62.027	12.4054	9.189	2.068	0	12.405	0	0	14.703	0.459	3.446	8.27	0	0	0	36.986	0	4.365	48.932	1.149	31.014	34	34	26.189	2.986	0	62.027
1.7625	16.7703	0	16.541	94.878	19.297	23.8919	21.824	17.459	83.1622	1.149	43.878	23.203	12.1757	25.27	86.149	127.73	95.568	9.1892	5.973	54.9054	34.689	14.473	60.6486	13.5541	9.649	3.216	0	12.865	0	0	13.784	0.23	2.986	8.5	0	0	0.23	33.77	0	5.284	44.797	2.297	28.946	32.622	32.622	25.27	3.446	0	62.716
1.7718	17.2297	0	17	93.27	19.068	23.8919	22.054	18.149	84.0811	1.378	43.878	23.662	11.4865	24.811	85.689	127.27	94.419	11.4865	5.284	55.3649	35.838	15.622	55.1351	15.3919	9.649	2.527	0	12.635	0	0	13.784	0	2.757	7.581	0	0	0.689	32.162	0	5.514	43.189	2.068	26.419	32.851	32.851	24.351	2.757	0.23	61.338
1.7812	17.9189	0	16.311	95.108	18.838	25.2703	22.514	16.541	89.1351	0.459	42.959	22.743	10.1081	21.824	82.014	128.419	92.581	10.7973	5.054	59.5	34.689	15.622	58.1216	14.9324	7.811	2.068	0	11.946	0	0	13.324	0	2.527	8.27	0	0	0.689	30.554	0	4.824	42.27	1.378	26.649	31.243	31.243	22.743	2.068	0.689	61.108
1.7906	15.6216	0	13.784	96.486	19.068	25.9595	22.514	16.541	87.527	0.23	43.649	19.527	9.4189	22.973	82.014	123.595	88.446	11.7162	5.514	55.5946	35.608	16.081	57.6622	14.473	7.581	1.838	0	12.635	0	0	13.324	0	1.838	9.189	0	0	0.919	31.703	0	4.365	42.73	0.23	24.122	28.716	28.716	22.743	2.527	0.459	61.338
1.8	16.5405	0	14.703	95.108	21.824	25.7297	22.973	17.689	87.0676	0.459	40.892	15.851	7.1216	21.365	83.162	124.743	90.514	11.4865	5.973	61.3378	37.676	16.081	54.9054	15.1622	6.892	2.068	0	10.108	0	0	11.027	0	0.689	8.27	0	0	0.689	29.865	0	4.595	43.419	0	25.27	29.176	29.176	21.135	4.135	0.23	59.041
1.8093	17.4595	0	14.243	93.73	20.446	24.1216	22.743	17	86.1487	0	40.432	16.311	5.973	22.743	85.459	125.892	87.527	11.027	6.203	59.9595	36.757	15.851	56.0541	14.0135	6.892	1.838	0	9.649	0	0	10.108	0	0.23	7.581	0	0	0.919	29.865	0	3.905	40.662	0	23.432	26.419	26.419	19.757	3.905	0.23	61.568
1.8187	18.1486	0	16.311	89.595	20.216	24.3514	22.284	18.378	85.9189	0	39.514	13.095	5.5135	21.595	82.014	121.527	84.311	11.027	6.203	62.027	35.378	15.392	57.2027	15.8514	7.122	0.23	0	9.189	0	0	10.338	0	0.23	5.743	0	0.23	0.919	32.851	0.689	2.068	39.973	0.459	22.514	25.27	25.27	17.23	4.824	0.689	58.581
1.8281	18.8378	0	17.23	84.541	20.216	25.0405	22.284	19.757	86.3784	0	39.514	11.946	5.0541	20.905	81.324	128.189	81.784	11.9459	5.514	60.1892	37.446	15.392	55.1351	17	6.203	0	0	7.811	0	0	10.108	0	0.23	5.973	0	0.459	0.919	30.554	0.689	1.838	40.203	1.149	21.595	26.419	26.419	14.243	5.973	0.459	59.959
1.8375	19.2973	0	14.473	82.703	20.905	25.9595	21.135	20.676	83.1622	0	39.973	10.797	4.3649	20.905	82.473	130.946	81.554	13.3243	5.514	57.6622	37.905	15.162	52.3784	16.3108	6.662	0	0	8.27	0	0	10.797	0	0	5.973	0.23	0.689	0.689	29.405	0.459	1.608	39.514	0.919	21.135	25.5	25.5	14.243	5.284	0	60.189
1.8468	20.2162	0	14.014	78.568	20.216	23.8919	20.676	20.216	80.6351	0	38.824	11.946	4.1351	18.608	84.311	133.014	85	12.6351	5.743	56.7432	37.676	12.635	45.4865	14.9324	5.973	0	0	8.959	0	0	9.878	0	0	6.432	0.23	1.378	0.689	31.932	0.459	1.378	38.595	0	21.824	25.27	25.27	14.014	4.135	0	58.351
1.8562	21.1351	0	15.392	74.662	17.459	25.5	20.676	22.284	80.6351	0	39.973	12.176	3.4459	19.527	85.23	132.554	82.014	12.1757	7.351	62.9459	38.595	10.338	46.8649	15.1622	3.676	0	0	10.108	0	0	8.959	0	0	6.432	0.23	1.838	0.919	32.622	0.459	2.068	38.365	0	23.203	26.189	26.189	13.324	3.216	0	58.581
1.8656	20.4459	0	15.162	71.905	17.459	25.2703	20.676	21.595	81.3243	0	42.041	11.716	3.2162	21.824	85.689	127.959	77.878	14.0135	8.041	59.7297	37.676	10.108	43.6486	17.4595	4.595	0	0	10.338	0.23	0	9.419	0	0	6.203	0.919	1.378	1.149	30.095	0.459	0.919	36.068	1.149	22.514	25.5	25.5	13.784	3.905	0.23	59.041
1.875	19.9865	0	15.162	68.689	18.149	24.5811	22.284	22.743	78.1081	0	40.892	11.946	2.9865	21.365	83.162	127.959	78.797	14.7027	8.27	59.0405	37.216	9.419	48.2432	17	5.284	0.459	0	8.5	0.459	0	9.419	0	0	5.284	0.919	1.378	1.378	29.635	0.919	1.838	34.919	1.149	21.824	23.203	23.203	15.622	2.757	0.459	59.041
1.8843	21.1351	0	16.081	63.176	19.757	24.8108	19.757	22.284	70.9865	0	42.041	10.797	2.527	22.743	84.541	128.649	74.432	14.2432	8.959	63.1757	38.595	8.27	48.0135	18.6081	6.203	0.689	0	7.351	0.23	0	9.189	0	0.689	4.595	0.689	1.149	1.608	30.095	0.23	2.527	33.311	1.378	20.905	24.811	24.811	15.392	3.676	0.23	59.5
1.8937	19.7568	0	13.324	59.27	16.311	25.2703	18.149	21.135	62.2568	0	41.351	7.811	2.527	23.662	87.068	116.703	76.959	15.3919	8.959	60.8784	39.284	8.73	46.4054	18.8378	6.432	0.459	0	7.581	0	0	8.959	0	0.689	3.446	0.689	0.23	1.149	31.014	0.23	2.527	32.851	1.149	20.216	25.041	25.041	14.014	4.365	0.459	57.203
1.9031	18.6081	0	14.703	57.432	15.851	24.3514	18.378	21.595	63.6351	0	39.973	5.973	1.3784	20.905	84.541	122.446	78.797	14.0135	8.5	66.6216	36.757	8.73	46.1757	17	5.743	0.23	0	7.581	0	0	9.878	0	0.689	3.216	0	0	0.23	32.622	0.23	2.068	33.311	0.919	20.446	22.743	22.743	14.473	4.595	0.689	56.514
1.9125	18.1486	0	17	55.824	16.311	23.8919	17	21.824	65.2432	0	40.203	5.284	1.1486	16.77	84.541	121.068	75.581	14.0135	7.811	66.3919	38.824	9.419	45.4865	19.2973	4.824	0	0	8.73	0	0	8.041	0	0.459	2.757	0	0	0	30.784	0	1.378	31.014	0	19.757	22.284	22.284	14.932	4.135	0.689	58.122
1.9218	17.9189	0	18.608	51.919	16.081	24.3514	17.459	20.905	67.5405	0	40.662	5.284	0.9189	15.622	85.23	113.257	70.757	15.3919	6.432	66.8513	37.216	10.338	42.9595	17.4595	2.986	0	0	8.959	0	0	8.041	0	0.459	2.757	0	0	0	29.865	0	1.149	29.865	0	17.919	20.446	20.446	13.324	4.135	0.689	57.892
1.9312	14.0135	0	17	48.243	15.622	22.2838	16.77	20.676	63.4054	0	39.743	4.595	0.2297	14.932	82.243	109.122	68.23	14.9324	6.892	68.6892	40.432	10.797	45.2568	17.2297	2.297	0	0	8.041	0	0	7.581	0	0	3.216	0	0	0	27.797	0	1.378	29.865	0	16.77	22.514	22.514	13.324	4.595	0.23	57.662
1.9406	14.9324	0	18.378	47.095	14.703	21.5946	16.081	19.297	66.1622	0	40.432	4.824	0.6892	15.162	83.162	113.257	70.297	15.6216	6.203	67.7703	40.203	10.568	44.3378	18.6081	1.838	0	0	8.041	0	0	7.581	0	0	3.446	0	0	0	26.649	0	0.689	26.419	0	17.23	21.824	21.824	11.946	3.676	0.23	56.054
1.95	15.6216	0	18.608	43.419	14.473	20.2162	18.149	19.527	67.5405	0	38.595	3.216	1.1486	15.851	82.473	114.865	69.149	17.6892	6.432	69.3784	39.054	11.027	44.5676	19.9865	2.068	0	0	7.351	0	0	8.27	0	0	4.135	0	0	0	25.041	0.23	0.689	25.041	0	16.77	22.514	22.514	9.878	3.216	0.689	56.284
1.9593	14.9324	0	16.77	37.216	16.311	22.2838	16.77	19.297	64.3243	0	39.054	2.986	1.3784	17	77.189	110.959	69.378	19.9865	7.811	69.8378	38.135	10.108	43.8784	18.6081	2.527	0	0	7.351	0	0	7.581	0	0	2.986	0	0	0	24.581	0.23	0.919	24.811	0	17.919	21.365	21.365	8.27	1.608	0.23	56.514
1.9687	16.0811	0	17.919	35.608	17	22.2838	16.081	19.527	65.473	0.23	36.527	1.838	1.3784	16.77	76.041	110.959	69.608	18.8378	7.581	68.9189	39.054	9.649	45.027	19.0676	0.919	0	0	8.73	0	0	8.27	0	0.23	3.216	0	0	0	21.135	0.689	0	25.27	0.689	16.311	20.676	20.676	7.122	1.149	0	54.446
1.9781	14.0135	0	16.541	34	14.243	19.9865	14.703	19.068	60.4189	0	34.689	1.838	0.9189	17.23	73.514	110.041	71.676	17.2297	7.581	72.8243	39.514	7.811	44.7973	18.3784	0.23	0	0	8.041	0	0	8.5	0	0.459	2.068	0	0	0	22.514	0.459	0.23	23.432	1.378	15.392	19.757	19.757	8.5	1.608	0	52.608
1.9875	12.4054	0	14.703	32.851	14.243	21.1351	13.784	19.297	59.5	0	32.851	2.757	0.4595	15.851	78.108	117.392	73.514	17.4595	7.351	68.4595	38.824	7.351	42.5	18.3784	0	0	0	10.108	0	0	8.959	0	0.459	3.216	0	0	0	21.365	0.459	0	22.743	1.149	14.932	20.676	20.676	8.73	2.527	0	51
1.9968	14.2432	0	17	29.635	13.784	19.2973	14.473	19.527	60.6486	0	31.243	2.757	0	15.622	72.824	115.095	75.351	18.3784	6.432	71.2162	36.757	7.351	42.9595	19.2973	0.23	0	0	10.338	0	0	8.73	0	0.23	2.297	0	0	0	21.365	0	0.23	20.905	0.919	14.014	19.527	19.527	8.27	2.757	0	50.541
2.0062	15.1622	0	17.23	25.5	16.081	17.9189	13.784	20.216	61.1081	0	29.405	2.986	0	17.459	75.351	115.324	72.824	16.7703	4.595	69.6081	36.757	7.811	43.1892	18.8378	0.23	0	0	9.878	0	0	7.811	0	0.23	1.608	0	0	0	19.757	0	0.459	17.919	0	14.014	18.149	18.149	7.351	3.446	0	52.378
2.0156	13.7838	0	17.459	22.054	14.014	18.1486	14.473	22.284	60.1892	0	28.027	2.986	0	17.459	71.676	121.068	71.446	16.5405	4.135	65.2432	36.527	7.811	43.6486	17	0.23	0	0	9.189	0	0	7.122	0	0.459	1.378	0	0	0	20.446	0	0.23	16.311	0	11.257	19.297	19.297	6.432	3.216	0	51.459
2.025	16.0811	0	17.919	18.378	13.784	18.8378	14.473	21.595	64.0946	0	29.405	1.838	0	16.77	72.365	124.054	69.378	14.9324	4.365	66.1622	37.216	8.27	47.3243	15.6216	0	0	0	8.959	0	0	7.811	0	0.459	0.919	0	0	0	18.378	0	0.459	16.77	0.689	9.878	18.378	18.378	6.203	3.216	0	51.23
2.0343	16.3108	0	18.608	16.77	13.784	20.6757	13.324	20.446	64.0946	0	28.027	1.149	0	17.919	75.122	119.689	65.932	15.1622	3.905	63.4054	35.378	8.041	43.1892	16.3108	0	0	0	8.5	0	0	6.892	0	0.459	0.23	0	0	0	17.23	0	0.689	18.149	0.23	7.122	17.23	17.23	4.824	3.446	0	51.459
2.0437	19.0676	0	17.919	13.784	13.324	19.527	11.716	20.216	62.7162	0	25.959	1.378	0	16.77	71.446	118.081	63.405	14.0135	3.446	62.2568	37.446	8.041	45.027	17.2297	0.23	0.23	0	9.878	0	0	6.662	0	0	0.23	0.23	0	0	17.23	0	0.919	19.297	0	7.811	18.149	18.149	4.365	3.446	0	51.23
2.0531	17.2297	0	17.919	11.486	13.095	20.4459	11.257	22.284	67.7703	0	27.338	1.608	0	16.081	75.122	121.527	60.189	12.1757	2.986	62.2568	36.527	7.811	44.5676	19.0676	0.23	0.23	0	10.338	0	0	7.811	0	0.23	0	0.459	0	0	16.77	0	0.919	17.459	0	8.5	19.068	19.068	5.054	2.527	0	51.23
2.0625	16.3108	0	17.689	10.338	11.486	17.4595	10.338	23.203	70.0676	0	24.581	1.838	0	15.622	72.135	123.365	59.27	12.8649	2.527	64.3243	35.838	7.811	45.7162	18.6081	0	0.23	0	9.189	0	0	6.892	0	0.23	0.919	0.23	0	0	11.946	0	0.919	15.851	0	7.351	19.527	19.527	5.514	2.297	0	51.23
2.0718	14.7027	0	18.608	13.324	10.108	18.3784	11.257	23.203	65.473	0	22.973	1.149	0.9189	14.932	72.365	124.973	58.581	14.2432	4.135	64.5541	37.216	7.351	44.3378	19.9865	0	0.689	0	7.811	0	0	5.973	0	0	0.919	0	0	0	10.338	0	0.23	15.851	0	5.743	17.919	17.919	5.743	1.378	0	52.838
2.0812	16.3108	0	17.689	13.784	10.797	17.4595	10.108	25.73	66.6216	0	20.446	0.919	1.8378	14.473	73.054	125.203	54.905	15.8514	3.446	63.1757	33.77	6.662	42.9595	20.6757	0	0.919	0	7.122	0	0	6.203	0	0	0.689	0	0	0	11.257	0	0.23	17	0	5.514	17.689	17.689	4.365	0.919	0	52.149
2.0906	14.9324	0	16.311	10.108	12.865	16.0811	10.568	23.892	60.8784	0	17.689	0.459	2.9865	10.568	69.838	127.5	56.054	16.5405	2.527	59.0405	32.392	6.662	40.6622	21.5946	0	1.149	0	7.351	0	0	6.203	0	0.23	0	0	0	0	10.338	0	0.689	16.77	0	5.284	15.162	15.162	4.595	0.919	0	53.986
2.1	15.8514	0	15.622	10.338	12.176	15.3919	10.108	25.5	61.1081	0	18.608	0.919	4.3649	12.176	69.838	125.892	55.135	14.473	2.757	58.5811	35.838	6.203	41.8108	24.5811	0	1.378	0	8.041	0	0	5.514	0	0.23	0	0	0	0	9.419	0	1.838	15.392	0.459	3.446	13.324	13.324	3.446	0.23	0	53.297
2.1093	16.5405	0	15.392	10.108	13.095	16.7703	9.878	25.959	61.7973	0	17.689	0.919	4.5946	11.486	68.919	126.581	54.216	13.7838	2.986	56.973	35.149	6.662	41.5811	26.8784	0	1.608	0	7.581	0	0	5.514	0	0.459	0	0	0	0	8.959	0	1.378	15.622	0.459	3.676	13.554	13.554	2.527	0	0	55.365
2.1187	17.9189	0	17	9.189	14.932	16.0811	8.5	24.811	60.6486	0	17.459	1.149	4.5946	11.486	72.365	130.946	52.149	11.9459	3.905	56.0541	34.459	5.514	42.5	26.4189	0.459	1.608	0	7.351	0	0	4.365	0	0.459	0.23	0	0	0	7.351	0	1.838	17.689	0.689	3.676	13.324	13.324	1.608	0.689	0	54.905
2.1281	18.1486	0	16.081	8.73	14.243	16.0811	8.5	22.514	60.6486	0	17.459	1.149	3.6757	11.946	76.041	134.162	50.77	12.4054	3.676	53.7568	32.162	5.743	40.4324	25.0405	0	1.378	0	7.122	0	0	3.446	0	0.919	0.689	0	0	0	5.973	0	1.149	17.459	0.23	3.216	13.324	13.324	0.919	1.149	0.689	54.446
2.1375	17.6892	0	15.851	9.419	12.865	18.6081	7.581	22.973	60.1892	0	17	0.459	4.3649	12.635	71.905	137.378	50.311	12.1757	3.446	53.2973	32.392	5.973	42.9595	24.8108	0	0.919	0	7.581	0	0	4.135	0	0.459	0.689	0	0	0	4.824	0	0	17.23	0	3.216	11.716	11.716	0.689	1.608	0.689	55.135
2.1468	18.8378	0	15.622	9.878	12.865	20.4459	7.581	23.892	62.027	0	17.689	0.23	4.1351	12.635	73.054	133.703	45.716	12.1757	3.216	53.2973	37.676	5.514	45.2568	25.5	0	0.23	0	6.203	0	0	3.676	0	0.459	0.689	0	0	0	5.284	0	0	18.838	0	2.297	10.108	10.108	0.689	1.608	0.689	53.757
2.1562	16.5405	0	13.324	10.338	12.405	20.9054	5.743	23.662	61.5676	0	15.622	0.689	4.1351	13.095	69.838	137.838	45.257	10.1081	3.446	52.8378	34.919	5.284	43.8784	24.3514	0	0	0	4.365	0	0	2.986	0	1.149	0.459	0	0	0	5.514	0	0	17.23	0	3.905	10.568	10.568	1.378	1.149	0.23	51.919
2.1656	16.5405	0	14.243	10.108	11.946	21.1351	5.973	23.662	61.7973	0	16.311	0.919	4.1351	12.865	68	141.743	45.946	12.8649	3.446	51.9189	34.919	4.595	47.5541	25.9595	0.23	0	0	3.905	0	0	3.446	0	1.149	0.919	0	0	0	5.284	0	0	17	0	3.676	8.73	8.73	1.378	0.689	0.23	52.149
2.175	15.1622	0	14.932	11.257	11.486	20.4459	5.514	22.973	59.5	0	16.541	0.459	4.3649	12.176	69.378	142.432	44.568	16.0811	3.905	51	34.919	5.054	49.3919	25.9595	0.459	0	0	2.986	0	0	3.676	0	2.297	0.689	0	0	0	2.986	0	0	17.23	0	2.757	8.73	8.73	0.459	0	0.23	50.081
2.1843	17.4595	0	13.784	10.568	11.946	22.5135	4.824	21.824	55.8243	0	16.311	0	5.0541	11.946	72.824	142.432	42.73	16.0811	3.905	51.2297	34.23	5.743	49.3919	27.7973	0.23	0	0	2.986	0	0	4.595	0	3.216	0.459	0	0	0.23	3.676	0	0	19.757	0	2.986	9.419	9.419	0.23	0.23	0	45.946
2.1937	16.0811	0	15.622	11.257	12.865	25.2703	4.135	22.514	50.7703	0	16.311	0.23	4.8243	12.405	74.203	146.797	40.203	17.2297	4.135	48.9324	32.392	5.973	49.8514	27.3378	0.23	0	0	2.527	0	0	3.676	0	3.446	0	0	0	0.459	3.905	0	0	17.459	0	2.986	9.649	9.649	0.23	0	0	45.257
2.2031	15.3919	0	14.243	11.257	13.324	27.1081	4.595	22.743	49.6216	0	16.081	0	5.7432	13.554	72.365	144.73	39.743	18.1486	4.824	48.2432	31.014	6.203	52.1486	23.4324	0	0	0	1.838	0	0	3.676	0	2.986	0	0	0	0.459	2.527	0	0	18.149	0.23	2.527	9.649	9.649	0.459	0	0	45.027
2.2125	14.473	0	13.784	10.797	11.716	26.6486	4.135	22.284	46.4054	0	14.473	0	5.973	13.784	75.122	145.649	37.676	17.9189	6.432	47.5541	31.243	5.054	50.7703	23.6622	0.23	0.23	0	2.068	0	0	3.905	0	2.986	0.459	0	0	0.459	2.527	0	0.23	17	0.459	2.986	10.108	10.108	0.23	0	0	43.878
2.2218	13.7838	0	12.865	10.338	12.176	30.7838	2.986	22.973	45.7162	0	14.703	0	5.973	14.014	73.743	148.635	36.068	16.5405	5.743	45.7162	32.622	4.135	50.5405	23.8919	0.23	0.23	0	2.068	0	0	3.905	0	2.757	0.459	0	0	0.459	2.068	0	0.23	17.459	0	2.068	11.716	11.716	0.689	0	0	43.878
2.2312	11.2568	0	13.784	10.568	11.257	29.1757	3.446	22.743	44.3378	0	12.865	0	5.2838	12.865	72.135	151.162	36.297	15.3919	5.054	44.5676	33.311	2.986	50.7703	23.4324	0.23	0.689	0	1.838	0	0	2.986	0	2.527	0.459	0	0	0.23	1.838	0	0.23	16.081	0	3.676	11.257	11.257	0.459	0	0	41.351
2.2406	11.9459	0	12.405	10.797	11.257	31.9324	3.216	23.203	41.1216	0	11.716	0	4.3649	13.784	70.068	149.784	39.054	16.5405	6.203	44.1081	34.919	2.757	46.8649	22.5135	0	1.608	0	1.149	0	0	2.068	0	2.527	0.23	0	0	0	2.527	0	0.919	14.473	0	3.676	12.176	12.176	0.919	0	0	40.432
2.25	12.8649	0	11.716	9.649	11.486	31.7027	3.446	22.743	40.4324	0	13.095	0	3.4459	12.865	68.459	151.392	38.135	16.5405	7.581	43.8784	35.378	2.297	49.3919	23.6622	0	1.149	0	1.149	0	0	1.378	0	2.297	1.149	0	0	0	2.757	0	0.689	14.243	0	3.676	11.027	11.027	1.378	0	0	40.432
2.2593	13.5541	0	10.797	10.338	10.568	34.6892	3.676	21.824	39.7432	0	11.486	0	4.3649	13.784	69.838	151.851	35.608	17.2297	8.041	42.7297	38.365	2.527	50.3108	22.2838	0	0.919	0	1.378	0	0	0.919	0	2.068	1.838	0	0	0	2.757	0	0.689	14.473	0	3.676	10.338	10.338	0.919	0	0	41.122
2.2687	14.473	0	11.716	9.649	11.027	32.8514	3.905	19.986	39.5135	0	11.257	0	5.0541	12.865	71.905	146.568	35.838	17	8.959	42.9595	37.446	2.986	54.9054	20.9054	0	0.459	0	2.068	0	0	0.459	0	2.068	1.838	0	0	0	2.297	0	0.459	11.257	0	2.297	11.027	11.027	0.919	0	0	40.432
2.2781	13.5541	0	11.027	10.338	11.486	34.4595	4.135	21.365	34.9189	0	9.649	0	4.1351	12.405	72.824	146.568	35.608	18.8378	9.419	42.0405	36.757	2.986	52.3784	22.973	0	0.459	0	1.838	0	0	0.919	0	1.838	0.919	0	0	0	1.608	0	0	12.635	0	2.068	10.108	10.108	0.689	0	0	38.824
2.2875	12.1757	0	10.568	11.257	10.797	36.2973	4.595	20.905	34.2297	0	9.419	0	3.9054	13.554	75.122	143.581	33.081	17.4595	9.878	42.7297	37.446	3.216	52.1486	21.3649	0	0.459	0	1.149	0	0	1.149	0	1.608	0	0	0	0	0.919	0	0	11.257	0	2.068	8.959	8.959	1.149	0	0	36.527
2.2968	11.4865	0	9.419	12.176	10.797	36.0676	5.284	21.365	34.2297	0	9.419	0	3.2162	12.176	73.973	147.486	34	18.6081	10.797	43.1892	38.595	4.135	53.2973	20.9054	0	0	0	0.919	0	0	0.919	0	1.608	0	0	0	0	2.297	0	0	9.419	0	0.919	8.5	8.5	1.149	0	0	36.297
2.3062	11.2568	0	8.959	11.257	10.568	32.8514	5.284	21.135	31.2432	0	7.811	0	3.4459	12.176	75.811	144.27	36.297	17	12.635	42.7297	40.432	3.446	53.9865	20.2162	0	0.459	0	0.689	0	0	0.23	0	1.838	0	0	0	0	2.297	0	0	6.892	0	0.919	8.73	8.73	0.689	0.23	0	34.23
2.3156	10.1081	0	9.189	9.649	10.108	31.9324	5.284	21.824	28.7162	0	7.122	0	1.6081	11.257	76.041	142.432	36.986	18.6081	14.243	40.2027	43.878	3.446	55.1351	19.527	0	0.689	0	0.689	0	0	0	0	1.149	0	0	0	0	0.919	0	0.689	4.595	0	0.459	8.959	8.959	0.689	0	0	32.851
2.325	12.4054	0	8.27	10.338	8.041	33.5405	5.973	22.973	27.1081	0	7.581	0	0.6892	11.257	75.122	142.892	37.676	18.3784	14.243	42.0405	44.568	3.446	52.3784	22.2838	0	0.459	0	0.919	0	0	0	0	2.297	0	0.459	0	0	1.838	0	0.919	3.446	0.689	0.459	8.73	8.73	0.689	0	0	31.243
2.3343	11.2568	0	7.581	11.027	7.811	35.8378	5.973	22.284	28.9459	0	5.973	0	0.4595	9.878	71.446	138.297	36.297	18.3784	15.162	42.0405	44.568	3.446	51.4595	22.973	0	0.689	0	1.838	0	0	0	0	3.446	0	0.23	0	0	1.838	0	0.689	3.676	1.149	0.23	8.27	8.27	0.689	0	0	32.622
2.3437	10.5676	0	8.041	11.486	7.811	40.2027	5.514	21.135	24.5811	0	4.824	0	0.9189	9.189	70.527	133.243	38.595	19.9865	16.541	39.7432	45.027	3.216	48.7027	21.8243	0	0.459	0	2.527	0	0	0	0	3.676	0	0	0	0	0.919	0	0.23	3.216	0.919	0.23	8.5	8.5	0.689	0	0	31.703
2.3531	9.1892	0	8.959	12.405	6.662	45.027	4.595	20.905	25.0405	0	4.365	0	0.9189	8.5	69.838	131.635	35.608	19.9865	18.378	41.8108	43.649	3.216	52.6081	21.3649	0	0.459	0	1.838	0	0	0	0	3.216	0	0	0	0	1.149	0	0.23	2.757	0.919	0.23	8.5	8.5	0.919	0.23	0	31.014
2.3625	8.7297	0	8.73	12.405	6.662	44.5676	2.527	20.676	24.5811	0	3.905	0	1.8378	7.581	64.554	126.811	36.297	18.3784	17.919	38.1351	44.338	3.676	54.4459	21.1351	0	0.459	0	1.378	0	0	0.459	0	2.297	0	0	0	0	1.378	0	0.23	3.446	0.459	0.459	8.959	8.959	0.919	0.689	0	31.014
2.3718	8.7297	0	7.581	11.716	5.973	45.7162	2.297	20.905	23.8919	0	4.135	0	2.0676	8.27	68.459	127.5	36.757	16.0811	18.838	39.7432	48.014	3.905	55.5946	20.9054	0	0.23	0	0.689	0	0	1.608	0	2.068	0	0	0	0	0.919	0	0.23	3.905	0.23	0.689	8.73	8.73	0.689	0.689	0	29.865
2.3812	7.5811	0	7.122	10.797	6.892	46.8649	1.838	21.365	23.8919	0	2.297	0	1.3784	8.27	71.446	130.486	33.311	17.6892	21.824	39.973	48.703	4.824	56.7432	20.4459	0	0	0	0.459	0	0	1.838	0	0.919	0	0.23	0	0	0.689	0	0	3.216	0.23	0.459	9.878	9.878	0.23	0.689	0	29.865
2.3906	6.6622	0	6.203	10.797	6.203	48.473	1.608	19.297	24.1216	0	2.068	0	0.4595	7.122	72.365	127.5	33.081	14.473	21.824	39.5135	46.176	4.365	59.7297	19.7568	0	0.23	0	0.459	0	0	2.757	0	2.527	0	0.23	0	0	0.459	0	0	3.905	0.459	0.459	9.878	9.878	0.459	0	0	29.176
2.4	5.973	0	6.432	11.027	6.662	46.4054	1.608	20.216	22.2838	0	1.149	0	0.4595	5.743	70.757	125.662	35.608	15.3919	26.189	38.5946	49.392	3.676	55.5946	22.7432	0	0.459	0	0	0	0	2.527	0	2.297	0	0	0	0	0	0	0	5.054	0.689	0.459	11.027	11.027	0.689	0	0	30.095
2.4093	5.2838	0	5.973	10.568	5.743	45.7162	0.919	18.838	20.6757	0	1.149	0	0.6892	4.824	71.446	127.959	34.23	16.7703	26.878	36.7568	49.162	2.986	52.3784	23.2027	0	0.459	0	0.23	0	0	1.838	0	2.068	0	0	0	0	0	0	0	6.432	0.689	0.919	11.716	11.716	0.689	0	0	30.324
2.4187	6.2027	0	5.973	10.338	5.054	48.473	0.919	17.689	17.6892	0	0.919	0	0.6892	4.824	74.203	126.811	36.068	16.5405	29.865	34.4595	48.473	2.068	52.6081	23.4324	0	0.23	0	0.459	0	0	0.919	0	1.149	0	0	0	0	0	0	0	6.203	0.689	0.459	11.486	11.486	0.689	0	0	28.946
2.4281	7.1216	0	6.432	11.257	6.432	51	0.919	16.541	18.1486	0	0.919	0	1.8378	4.824	76.73	129.338	38.595	18.8378	31.014	33.3108	47.554	2.068	55.5946	23.2027	0	0	0	0.689	0	0	0.23	0	0.459	0	0	0	0	0.23	0	0	5.054	0.23	0.689	10.338	10.338	0.459	0	0	29.405
2.4375	5.973	0	8.27	11.716	6.662	49.3919	0.919	17	16.7703	0	0	0	2.2973	3.216	74.432	128.419	37.216	19.527	31.473	34	45.027	1.838	54.2162	24.3514	0	0	0	0.919	0	0	0	0	0.459	0	0	0	0	0.23	0	0	5.973	0	0.459	8.73	8.73	0.23	0	0	30.095
2.4468	7.1216	0	7.122	10.338	6.432	48.473	1.149	16.081	15.3919	0	0	0	2.2973	2.297	76.041	127.959	35.838	19.9865	31.014	34.4595	47.324	1.608	54.6757	24.1216	0	0	0	0.689	0	0	0	0	0.23	0	0	0	0	0	0	0	4.824	0	0	9.189	9.189	0.23	0	0	30.324
2.4562	6.6622	0	6.662	10.797	6.432	49.1622	0.919	15.392	15.3919	0	0	0	2.0676	2.297	78.568	124.743	35.378	21.8243	32.162	35.8378	45.716	1.378	56.7432	22.973	0.23	0	0	0.459	0	0	0	0	0	0	0	0	0	0.23	0	0	3.216	0	0	9.189	9.189	0.459	0	0	31.473
2.4656	6.2027	0	6.203	11.027	4.824	51.4595	1.149	15.392	11.7162	0	0	0	2.0676	1.608	76.5	133.243	36.986	22.7432	32.392	35.8378	47.554	1.149	53.7568	24.1216	0.23	0	0	0	0	0	0	0	0	0	0	0	0	0.23	0	0	2.986	0	0.23	8.73	8.73	0.459	0	0	30.324
2.475	6.2027	0	5.514	11.716	4.135	53.0676	0.689	15.162	8.7297	0	0	0	1.6081	0.689	78.568	135.081	40.662	23.8919	34.459	38.5946	49.622	1.149	50.3108	22.7432	0	0	0	0	0	0	0	0	0	0	0	0	0	0.689	0	0	2.757	0	0	8.27	8.27	0	0	0	29.635
2.4843	7.5811	0	4.135	11.486	3.905	51.9189	0.459	14.703	7.5811	0	0	0	1.8378	0.459	83.851	133.243	37.905	22.973	35.608	40.4324	52.838	0.919	50.3108	22.7432	0.689	0	0	0	0	0	0	0	0	0	0	0	0	0.919	0	0	2.757	0	0.23	7.811	7.811	0	0	0	29.405
2.4937	7.1216	0	3.676	11.027	4.365	53.2973	0.689	14.932	5.7432	0	0	0	2.0676	0.689	83.392	130.716	36.068	22.973	36.986	40.6622	52.838	0.689	52.3784	20.9054	0.23	0	0	0	0	0	0	0	0	0	0	0	0	1.149	0	0	2.068	0	0	7.811	7.811	0	0	0	29.635
2.5031	7.1216	0	3.676	11.257	4.365	51.9189	0.459	13.554	3.6757	0	0	0.23	1.8378	0.919	78.108	132.554	34.23	24.5811	38.824	37.9054	54.446	0.459	52.1486	19.9865	0.23	0	0	0	0	0	0	0	0	0	0	0	0	0.689	0	0	1.378	0	0	6.432	6.432	0	0	0	28.946
2.5125	6.6622	0	2.986	11.486	3.446	51.4595	0.689	12.176	3.6757	0	0	0	0.9189	0.919	74.892	127.959	35.378	24.1216	40.662	36.9865	48.703	0.459	48.473	19.7568	0.459	0	0	0.23	0	0	0	0	0	0	0	0	0	0.919	0	0	0.919	0	0	6.203	6.203	0	0	0	27.338
2.5218	6.6622	0	2.527	11.716	2.297	51	0.689	11.716	2.0676	0	0	0	0.6892	1.149	71.676	126.351	36.068	23.8919	39.054	36.2973	53.757	0.689	51.6892	18.3784	0.919	0	0	0	0	0	0	0	0	0	0	0	0	0.689	0	0	0.689	0	0.23	5.973	5.973	0	0	0	26.419
2.5312	6.8919	0	2.757	10.797	2.068	54.6757	0.459	11.716	1.1486	0	0	0	0	1.378	77.419	130.716	35.608	27.1081	37.216	34.9189	55.824	0.689	48.7027	19.2973	0.919	0	0	0.23	0	0	0.689	0	0	0	0	0	0	0.459	0	0	1.149	0	0.459	6.203	6.203	0	0	0	26.419
2.5406	5.5135	0	2.297	10.568	0.689	53.9865	0.919	10.568	0.2297	0	0	0	0	1.608	74.203	133.703	31.932	27.7973	41.351	31.473	60.649	1.838	48.7027	17.9189	0.919	0	0	0.459	0	0	0.919	0	0	0	0	0	0	0.23	0	0	1.378	0	0.459	5.743	5.743	0	0	0	26.189
2.55	5.7432	0	2.068	11.716	0.459	57.2027	1.149	9.189	0.9189	0	0	0	0.2297	2.068	74.662	138.068	31.932	27.5676	43.649	28.2568	65.243	1.838	48.9324	20.2162	0.459	0	0	0	0	0	1.378	0	0	0	0	0	0	0.23	0	0	1.608	0	0.919	5.284	5.284	0	0	0	26.649
2.5593	5.7432	0	1.608	11.027	0.23	58.5811	1.149	9.189	0.9189	0	0	0	0.6892	1.608	70.527	140.135	30.784	28.4865	42.041	25.5	64.784	1.149	46.8649	20.2162	0.459	0	0	0	0	0	0.689	0	0	0	0	0	0	0	0	0	1.838	0	0.919	5.284	5.284	0	0	0	27.797
2.5687	6.8919	0	2.068	11.946	0.23	59.9595	1.149	9.189	0.6892	0	0	0	0.2297	1.838	72.824	138.527	37.676	28.7162	38.595	23.8919	68.689	0.459	48.7027	18.8378	0.459	0	0	0	0	0	0.23	0	0	0	0	0	0	0	0	0	1.378	0	0.689	5.973	5.973	0	0	0	28.716
2.5781	6.6622	0	1.838	11.486	0.459	58.3514	0.689	8.73	0.2297	0	0	0	0.6892	1.838	67.311	138.297	39.054	33.0811	43.649	24.1216	68.689	0	48.9324	20.2162	0.459	0	0	0	0	0	0	0	0	0	0	0	0	0	0	0	2.527	0	0.23	6.203	6.203	0	0	0	29.405
2.5874	6.6622	0	1.838	11.486	0.689	60.4189	0.919	8.27	0	0	0	0	1.1486	1.608	70.757	138.527	36.757	34	41.811	21.8243	70.527	0	47.3243	19.7568	0.23	0	0	0	0	0	0	0	0	0	0	0	0	0	0	0	2.068	0	0	5.514	5.514	0	0	0	29.635
2.5968	6.4324	0	0.689	11.257	0.689	63.1757	1.838	7.811	0	0	0	0	2.0676	1.149	73.514	138.757	36.297	34.6892	42.5	20.9054	70.297	0	47.3243	20.4459	0.23	0	0	0	0	0	0	0	0	0	0	0	0	0	0	0	1.149	0	0.459	4.135	4.135	0	0	0	30.095
2.6062	6.6622	0	0.689	10.797	0.459	59.2703	1.608	8.041	0	0	0	0	2.0676	1.838	76.5	136	37.446	36.2973	42.27	21.5946	71.216	0	43.1892	20.2162	0.459	0	0	0	0	0	0	0	0	0	0	0	0	0	0	0	2.068	0	0.459	3.446	3.446	0	0	0	30.324
2.6156	6.8919	0	0.459	11.486	0.459	58.1216	1.838	7.351	0	0	0	0	1.8378	1.838	78.568	133.243	39.514	35.3784	41.122	20.2162	68.23	0	41.8108	21.5946	0.23	0	0	0	0	0	0	0	0	0	0	0	0	0	0	0	2.527	0	0.459	2.527	2.527	0	0	0	31.473
2.6249	7.8108	0	0	9.878	1.149	58.8108	1.378	5.973	0	0	0	0	2.0676	2.527	78.797	135.541	38.595	34.9189	44.338	20.4459	69.838	0	43.8784	23.6622	0	0	0	0	0	0	0	0	0	0	0	0	0	0	0	0	3.446	0	0.459	1.608	1.608	0	0	0	34.23
2.6343	7.8108	0	0	9.419	1.378	57.2027	1.378	5.514	0	0	0	0	2.9865	2.986	75.122	138.527	38.824	33.3108	45.486	20.9054	72.365	0	43.6486	26.1892	0	0	0	0	0	0	0	0	0	0	0	0	0	0	0	0	3.446	0	0	1.378	1.378	0	0	0	36.068
2.6437	8.0405	0	0	10.108	2.068	59.7297	1.608	5.973	0	0	0	0	3.6757	2.757	76.27	136	37.905	36.9865	46.405	21.5946	71.905	0	44.1081	24.5811	0	0	0	0	0	0	0	0	0	0	0	0	0	0	0	0	3.905	0	0.23	2.757	2.757	0	0	0	37.446
2.6531	8.5	0	0	9.419	2.068	58.1216	0.919	4.824	0	0	0	0	3.6757	2.757	73.743	136.459	37.905	36.9865	50.77	22.973	72.824	0	44.1081	26.4189	0	0	0	0	0	0	0	0	0	0	0	0	0	0	0	0	3.676	0	0	2.527	2.527	0	0	0	36.986
2.6624	8.0405	0	0	10.568	1.608	57.6622	0	4.595	0	0	0	0	2.9865	3.216	70.757	136.689	39.973	36.0676	46.635	21.1351	72.824	0	44.5676	26.4189	0.23	0	0	0	0	0	0	0	0	0	0	0	0	0	0	0	4.824	0	0	2.986	2.986	0	0	0	37.446
2.6718	7.3514	0	0	11.027	1.149	55.3649	0.459	4.595	0	0	0	0	1.8378	2.986	70.986	132.784	39.284	32.1622	53.527	20.6757	74.892	0	41.8108	25.0405	0.689	0	0	0	0	0	0	0	0	0	0	0	0	0	0	0	5.743	0	0	2.757	2.757	0	0	0	36.068
2.6812	6.8919	0	0	10.797	1.378	53.0676	0.689	5.284	0	0	0	0	1.1486	3.216	67.541	128.189	38.135	30.7838	57.432	19.0676	75.122	0	37.2162	26.4189	0.919	0	0	0	0	0	0	0	0	0	0	0	0	0	0	0	4.365	0	0	2.757	2.757	0	0	0	37.676
2.6906	6.2027	0	0	10.338	0.919	48.473	0.23	5.743	0	0	0	0	1.1486	4.824	68.689	127.5	39.973	34.9189	58.351	20.4459	73.284	0	34.2297	27.7973	0.689	0	0	0	0	0	0	0	0	0	0	0	0	0	0	0	3.446	0	0	3.446	3.446	0	0	0	39.054
2.6999	6.6622	0	0	9.649	0.459	45.7162	0.23	5.973	0	0	0	0	0.9189	6.432	67.541	124.973	40.432	38.1351	54.905	19.9865	72.824	0	36.2973	27.7973	0.689	0	0	0	0	0	0	0	0	0	0	0	0	0	0	0	2.297	0	0	2.757	2.757	0	0	0	39.743
2.7093	5.973	0	0	10.797	0.23	49.6216	0	4.824	0	0	0	0	0.4595	6.892	61.797	122.676	41.581	38.8243	54.216	23.2027	74.203	0	36.527	25.7297	1.378	0	0	0	0	0	0	0	0	0	0	0	0	0	0	0	1.838	0	0	2.297	2.297	0	0	0	38.824
2.7187	7.3514	0	0	11.027	0	51.2297	0	4.824	0	0	0	0	0.4595	6.432	59.959	122.676	44.108	39.973	55.135	21.5946	79.716	0	37.9054	29.1757	1.378	0	0	0	0	0	0	0	0	0	0	0	0	0	0	0	0.459	0	0	1.608	1.608	0	0	0	39.514
2.7281	8.0405	0	0	10.568	0.689	52.3784	0	5.054	0	0	0	0	0.6892	5.054	62.716	123.365	43.189	40.2027	59.27	19.0676	83.622	0	33.7703	31.7027	0.919	0	0	0	0	0	0	0	0	0	0	0	0	0	0	0	0.459	0	0	1.149	1.149	0	0	0	41.122
2.7374	8.9595	0	0	10.568	1.608	54.4459	0	4.824	0	0	0	0	0.6892	4.595	64.784	125.432	43.189	39.2838	59.5	17.9189	79.486	0	33.5405	30.0946	1.149	0	0	0	0	0	0	0	0	0	0	0	0	0	0	0	0.689	0	0	1.378	1.378	0	0	0	41.811
2.7468	8.2703	0	0	10.338	2.068	54.9054	0	5.054	0	0	0	0	0.6892	4.824	68	120.838	44.797	38.1351	59.5	19.7568	78.338	0	29.8649	30.5541	0.919	0	0	0	0	0	0	0	0	0	0.23	0	0	0	0	0	0	0	0	1.378	1.378	0	0	0	42.27
2.7562	9.8784	0	0	10.568	1.838	56.0541	0	4.824	0	0	0	0	0.4595	5.054	64.095	119.459	42.041	39.0541	61.568	19.527	81.554	0.689	28.4865	32.3919	1.149	0	0	0	0	0	0	0	0	0	0	0	0	0	0	0	0.689	0	0	1.149	1.149	0	0	0	43.419
2.7656	10.3378	0	0	10.568	2.068	54.9054	0	3.905	0	0	0	0	0.4595	6.432	64.095	115.784	41.122	38.8243	68.689	21.5946	84.081	1.149	30.0946	35.8378	1.378	0	0	0	0	0	0	0	0	0	0	0	0	0	0	0	0.919	0	0	0.919	0.919	0	0	0	41.811
2.7749	9.6486	0	0	10.108	1.378	53.9865	0	2.297	0	0	0	0	0.9189	6.203	61.108	115.784	41.122	42.7297	74.662	22.5135	80.176	1.838	29.4054	39.0541	1.149	0	0	0	0	0	0	0	0	0	0	0	0	0	0	0	1.149	0	0	1.378	1.378	0	0	0	41.122
2.7843	9.4189	0	0	10.338	2.527	58.1216	0	2.297	0	0	0	0	1.1486	5.514	59.73	114.865	43.419	45.027	78.568	20.6757	83.622	2.068	29.1757	41.3514	0.689	0	0	0.23	0	0	0	0	0	0	0	0	0	0	0	0	1.608	0	0	1.149	1.149	0	0	0	42.959
2.7937	10.3378	0	0	9.649	2.297	59.5	0	1.378	0	0	0	0	0.9189	5.743	54.216	110.27	44.568	46.6351	79.486	20.9054	82.243	1.838	29.1757	45.7162	0.459	0	0	0.23	0	0	0	0	0	0	0	0	0	0	0	0	2.068	0	0.23	0.689	0.689	0	0	0	44.108
2.8031	12.6351	0	0	8.73	2.527	60.1892	0	1.378	0	0	0	0	1.6081	6.203	54.905	108.662	42.959	44.5676	82.014	20.2162	81.324	2.068	28.027	42.9595	0	0	0	0.689	0	0	0	0	0	0	0	0	0	0	0	0	2.297	0	0	0.459	0.459	0	0	0	43.649
2.8124	12.8649	0	0	8.959	2.757	60.8784	0	1.149	0	0	0	0	1.3784	5.743	57.432	104.527	43.878	39.973	84.77	20.6757	79.027	1.378	26.8784	42.7297	0	0	0	0.689	0	0	0	0	0	0	0	0	0	0	0	0	2.297	0	0.23	0.23	0.23	0	0	0	43.189
2.8218	13.7838	0	0	8.959	3.446	59.2703	0	0.689	0	0	0	0	2.0676	6.662	59.041	106.595	41.351	37.6757	85	19.527	79.946	0	28.4865	44.7973	0	0	0	0.459	0	0	0	0	0	0	0	0	0	0	0	0	3.446	0	0	0.459	0.459	0	0	0	44.338
2.8312	13.7838	0	0	9.878	3.216	59.2703	0	0.23	0	0	0	0	1.8378	5.973	58.351	108.432	45.946	38.5946	87.527	18.3784	84.541	0	27.1081	44.7973	0	0	0	0.23	0	0	0	0	0	0	0	0	0	0	0	0	3.676	0	0	0.689	0.689	0	0	0	43.189
2.8406	12.6351	0	0	10.568	2.757	57.4324	0	0	0	0	0	0	2.0676	5.054	57.432	110.041	44.338	35.6081	84.77	18.8378	79.486	0	24.3514	45.2568	0	0	0	0	0	0	0	0	0	0	0	0	0	0	0	0	4.365	0	0	0.23	0.23	0	0	0	42.5
2.8499	14.2432	0	0	10.338	2.297	58.3514	0	0	0	0	0	0	1.1486	5.743	58.811	103.378	46.176	37.4459	83.162	17.4595	82.243	0	23.2027	46.1757	0	0	0	0	0	0	0	0	0	0	0	0	0	0.23	0	0	4.824	0	0	0.23	0.23	0	0	0	44.108
2.8593	16.5405	0	0	9.649	1.378	60.1892	0	0.459	0	0	0	0	1.1486	6.203	58.122	98.784	49.851	39.973	80.635	17.4595	82.243	0	22.973	44.5676	0	0	0	0	0	0	0	0	0	0	0	0	0	0.459	0	0	4.595	0	0	0.459	0.459	0	0	0	42.041
2.8687	15.3919	0	0	9.878	1.149	59.5	0	0.919	0	0	0	0	1.8378	4.135	57.203	97.176	51	40.8919	83.851	16.7703	81.554	0	22.7432	44.1081	0	0	0	0	0	0	0	0	0	0	0	0	0	0.23	0	0	4.824	0	0	0.23	0.23	0	0	0	41.351
2.8781	16.7703	0	0	9.649	0.689	58.8108	0	1.608	0	0	0	0	1.3784	5.284	59.041	95.338	48.243	41.1216	87.297	16.3108	81.095	0	21.3649	45.027	0	0	0	0	0	0	0	0	0	0	0	0	0	0	0	0	4.365	0	0	0	0	0	0	0	41.581
2.8874	17.9189	0	0	8.959	0	61.7973	0	1.608	0	0	0	0	1.1486	4.824	60.649	93.959	46.405	40.2027	88.446	15.3919	89.135	0	22.2838	45.7162	0	0	0	0	0	0	0	0	0	0	0	0	0	0	0	0	5.284	0	0	0	0	0	0	0	41.122
2.8968	18.8378	0	0	10.338	0	64.7838	0	1.608	0	0	0	0	1.3784	4.365	58.811	95.568	46.635	41.1216	90.743	15.6216	91.662	0	19.527	43.4189	0	0	0	0	0	0	0	0	0	0	0	0	0	0	0	0	5.514	0	0	0	0	0	0	0	38.365
2.9062	18.1486	0	0	10.568	0.23	69.1487	0	1.838	0	0	0	0	0.4595	4.824	57.892	90.973	44.797	39.7432	90.973	16.7703	88.446	0	20.2162	44.1081	0	0	0	0	0	0	0	0	0	0	0	0	0	0	0	0	5.054	0.919	0	0	0	0	0	0	39.054
2.9156	17.2297	0	0	10.568	0.459	73.7432	0	0.919	0	0	0	0	0.2297	4.365	58.811	90.743	45.946	35.1486	89.365	17.4595	91.662	0	21.1351	44.1081	0	0	0	0	0	0	0	0	0	0	0	0	0	0	0	0	4.365	1.149	0	0	0	0	0	0	40.662
2.9249	17.9189	0	0	11.027	0.919	70.7568	0	0.23	0	0	0	0	0	4.135	59.041	85.919	45.486	32.6216	89.824	16.5405	89.824	0	20.2162	44.3378	0	0	0	0	0	0	0	0	0	0	0	0	0	0	0	0	3.905	0.919	0	0	0	0	0.23	0	40.432
2.9343	18.3784	0	0	11.486	1.838	74.4324	0.459	0.23	0	0	0	0	0.4595	2.757	62.946	89.365	44.568	34.4595	94.419	15.8514	90.284	0	21.1351	44.3378	0	0	0	0	0	0	0	0	0	0	0	0	0	0	0	0	4.595	0.689	0	0	0	0	0	0	38.824
2.9437	17.9189	0	0	11.716	1.378	75.1216	0.459	0	0	0	0	0	0.9189	2.527	63.635	85.459	40.203	36.2973	97.865	14.7027	92.811	0	20.2162	46.1757	0	0	0	0	0	0	0	0	0	0	0	0	0	0	0	0	4.365	0	0	0	0	0	0	0	39.514
2.9531	19.9865	0	0	11.716	1.149	77.8784	0	0	0	0	0	0	2.2973	2.757	60.649	78.797	40.892	35.3784	95.108	14.7027	93.959	0	20.2162	46.6351	0	0	0	0	0	0	0	0	0	0	0	0	0	0	0	0	2.757	0	0	0	0	0	0	0	39.514
2.9624	18.1486	0	0	12.176	0.23	78.7973	0	0	0	0	0	0	2.7568	2.068	59.959	82.014	45.486	32.3919	101.541	13.7838	94.649	0	19.9865	46.8649	0	0	0	0	0	0	0	0	0	0	0	0	0	0	0	0	2.068	0.23	0	0	0	0	0	0	38.595
2.9718	18.3784	0	0	12.635	0	80.4054	0	0	0	0	0	0	2.7568	1.608	61.797	75.811	46.176	33.5405	100.851	12.1757	94.419	0	18.3784	45.027	0	0	0	0	0	0	0	0	0	0	0	0	0	0	0	0	1.838	0.23	0	0	0	0	0	0	38.135
2.9812	20.4459	0	0	12.176	0	77.6487	0.23	0	0	0	0	0	2.7568	1.608	67.541	77.878	45.486	34.4595	101.081	12.8649	97.176	0	16.0811	45.7162	0	0	0	0	0	0	0	0	0	0	0	0	0	0	0	0	1.838	0.23	0	0	0	0	0	0	39.054
2.9906	19.7568	0	0	13.784	0	73.5135	0.23	0	0	0	0	0	2.2973	1.608	69.149	73.743	46.405	35.3784	96.257	14.0135	97.865	0	16.7703	43.6486	0	0	0	0	0	0	0	0	0	0	0	0	0	0	0	0	1.149	0	0	0	0	0	0	0	37.905
2.9999	17.4595	0	0	14.473	0.23	72.3649	0	0	0	0	0	0	0.9189	1.378	66.622	71.216	45.486	32.3919	96.486	11.4865	98.095	0	19.527	47.3243	0	0	0	0	0	0	0	0	0	0	0	0	0	0	0	0	0.919	0	0	0	0	0	0	0	37.905
3.0093	17.4595	0	0	12.635	0.689	70.527	0	0	0	0	0	0	0	0.919	64.554	72.135	46.635	32.6216	98.554	11.7162	100.162	0	21.3649	46.4054	0	0.459	0	0	0	0	0	0	0	0	0.459	0	0	0	0	0	0.919	0	0	0	0	0	0	0	38.595
3.0187	17.2297	0	0	11.716	1.149	71.6757	0	0	0	0	0	0	0.2297	1.149	64.784	69.838	50.541	29.8649	98.095	13.3243	103.838	0	20.4459	44.7973	0	0.459	0	0	0	0	0	0	0	0	0.689	0	0	0	0	0	0	0	0	0	0	0	0	0	39.054
3.0281	18.6081	0	0	11.946	1.378	69.8378	0	0	0	0	0	0	0.6892	1.838	62.946	65.932	50.311	31.2432	97.865	10.7973	104.527	0	20.6757	45.2568	0	0.459	0	0	0	0	0	0	0	0	0.919	0	0	0	0	0	0	0	0	0	0	0	0	0	39.973
3.0374	17.4595	0	0	11.257	1.149	68.2297	0.23	0	0	0	0	0	0.9189	1.378	61.568	65.473	47.784	30.5541	97.405	12.6351	104.527	0	22.5135	45.2568	0	0.23	0	0	0	0	0	0	0	0	1.149	0	0	0	0	0	0	0	0	0	0	0	0	0	39.973
3.0468	17.6892	0	0	11.946	1.149	66.8513	0.23	0	0	0	0	0	0.4595	1.149	61.338	63.865	49.162	30.3243	92.811	14.2432	107.054	0	21.5946	49.3919	0	0.23	0	0	0	0	0	0	0	0	1.608	0	0	0	0	0	0	0	0	0	0	0	0	0	41.351
3.0562	18.1486	0	0	11.486	0.689	70.527	0.689	0	0	0	0	0	0.4595	1.149	61.797	61.797	47.784	30.3243	90.973	14.7027	101.081	0	21.1351	45.4865	0	0	0	0	0	0	0	0	0	0	1.838	0	0	0	0	0	0	0.23	0	0	0	0	0	0	41.351
3.0656	20.4459	0	0	11.027	0.23	70.527	0.459	0.23	0	0	0	0	0	1.149	61.108	60.649	48.243	28.027	88.446	14.2432	102.23	0	19.9865	47.3243	0	0	0	0	0	0	0	0	0	0	2.068	0	0	0	0	0	0.23	0.459	0	0	0	0	0	0	42.5
3.0749	19.7568	0	0	10.568	0.689	68.6892	0	0.459	0	0	0	0	0.2297	1.149	60.878	56.743	51	27.5676	90.973	14.0135	109.122	0	21.3649	48.473	0	0	0	0	0	0	0	0	0	0	2.527	0	0	0	0	0	0.23	0	0	0	0	0	0	0	40.662
3.0843	20.6757	0	0	10.108	0.689	68.9189	0	0.689	0	0	0	0	0	1.149	62.716	56.743	51.23	28.7162	91.203	14.473	110.73	0	21.1351	48.2432	0	0	0	0	0	0	0	0	0	0	2.757	0	0	0	0	0	0.23	0	0	0	0	0	0	0	42.27
3.0937	23.4324	0	0	8.959	0.919	65.473	0	0.689	0	0	0	0	0.2297	1.149	62.486	50.541	50.541	28.2568	90.514	14.473	111.649	0	17.4595	50.5405	0	0	0	0	0	0	0	0	0	0	2.986	0	0	0	0	0	0.23	0	0	0	0	0	0	0	42.959
3.1031	22.5135	0	0	8.27	0.919	68	0	0.23	0	0	0	0	0	1.149	62.946	47.324	51.919	26.6486	85.23	14.7027	109.351	0	18.3784	46.6351	0.23	0	0	0	0	0	0	0	0	0	2.297	0	0	0	0	0	0	0	0	0	0	0	0	0	42.959
3.1124	21.8243	0	0	7.811	0.919	69.6081	0	0.459	0	0	0	0	0	1.149	59.959	45.716	55.824	24.3514	82.932	13.3243	109.122	0	18.3784	49.1622	0	0	0	0	0	0	0	0	0	0	2.068	0	0	0	0	0	0	0.459	0	0	0	0	0	0	44.568
3.1218	24.5811	0	0	6.203	0.919	69.1487	0	0.689	0	0	0	0	0	1.378	57.432	45.946	53.757	26.1892	85	12.1757	111.189	0	19.527	50.5405	0	0	0	0	0	0	0	0	0	0	1.838	0	0	0	0	0	0	0.459	0	0	0	0	0	0	44.338
3.1312	25.9595	0	0	5.973	0.23	68.9189	0	0.919	0	0	0	0	0	1.378	59.5	41.122	51.689	26.8784	80.635	9.4189	110.5	0	20.2162	45.9459	0	0	0	0	0	0	0	0	0	0	1.149	0	0	0	0	0	0	0	0	0	0	0	0	0	44.568
3.1406	25.9595	0	0	5.743	0.23	71.6757	0	0.459	0	0	0	0	0.4595	1.149	55.365	39.284	51.23	26.4189	73.054	11.027	113.027	0	21.8243	46.4054	0	0	0	0	0	0	0	0	0	0	0.689	0	0	0	0	0	0.919	0	0	0	0	0	0	0	44.338
3.1499	25.7297	0	0	6.662	0.23	72.5946	0	0	0	0	0	0	0.6892	1.149	54.905	36.986	51.23	25.5	70.986	8.5	108.432	0	19.9865	48.473	0	0	0	0	0	0	0	0	0	0	0.689	0	0	0	0	0	1.378	0	0	0	0	0	0	0	42.959
3.1593	25.9595	0	0	6.662	1.608	69.6081	0	0	0	0	0	0	0.6892	1.378	53.757	34.919	52.838	25.9595	72.135	8.0405	103.378	0	19.0676	50.5405	0.23	0	0	0	0	0	0	0	0	0	0.459	0	0	0	0	0	1.378	0	0	0	0	0	0	0	44.797
3.1687	25.9595	0	0	6.892	1.608	65.7027	0	0	0	0	0	0	1.1486	1.149	53.297	32.392	51.689	27.5676	74.432	5.973	103.838	0	18.6081	50.5405	0	0	0	0	0	0	0	0	0	0	0.919	0	0	0	0	0	2.297	0	0	0	0	0	0	0	46.635
3.1781	27.1081	0	0	7.122	2.068	65.473	0	0	0	0	0	0	1.1486	1.149	49.392	31.014	55.595	25.7297	76.5	5.2838	102.23	0	21.3649	47.3243	0	0	0	0	0	0	0	0	0	0	0.919	0	0	0	0	0	2.527	0	0	0	0	0	0	0	48.932
3.1874	26.1892	0	0	7.122	1.838	61.3378	0	0	0	0	0	0	1.1486	1.149	53.297	31.932	55.135	25.9595	76.73	5.2838	96.946	0	18.6081	46.4054	0	0	0	0	0	0	0	0	0	0	0.919	0	0	0	0	0	2.527	0	0	0	0	0	0	0	47.554
3.1968	25.5	0	0	7.351	1.838	59.0405	0	0	0	0	0	0	1.1486	1.149	54.446	32.392	55.595	28.4865	81.324	5.973	92.811	0	19.2973	44.7973	0.23	0	0	0	0	0	0	0	0	0	0.919	0	0	0	0	0	1.838	0	0	0	0	0	0	0	44.338
3.2062	24.8108	0	0	7.811	1.608	61.7973	0	0	0	0	0	0	0.6892	1.149	57.203	29.635	54.446	29.1757	78.338	5.7432	91.432	0	18.8378	45.4865	0	0	0	0	0	0	0	0	0	0	1.149	0	0	0	0	0	1.838	0	0	0	0	0	0	0	42.73
3.2156	22.7432	0	0	6.892	1.838	60.4189	0	0	0	0	0	0	0.6892	0.919	54.446	27.797	54.216	26.1892	76.5	6.4324	87.068	0	18.8378	46.6351	0	0	0	0	0	0	0	0	0	0	0.459	0	0	0	0	0	2.068	0	0	0	0	0	0	0	42.27
3.2249	21.8243	0	0	6.892	2.527	59.0405	0	0	0	0	0.23	0	0.2297	0.689	49.162	27.108	56.514	25.7297	79.257	6.2027	85.689	0	18.6081	48.0135	0	0	0	0	0	0	0	0	0	0	0.919	0	0	0	0	0	1.838	0	0	0	0	0	0	0	40.203
3.2343	24.5811	0	0	7.351	3.676	60.4189	0	0	0	0	0.459	0	0.2297	0.689	49.392	26.419	55.824	25.0405	82.473	5.5135	88.216	0	18.3784	46.8649	0	0	0	0	0	0	0	0	0	0	0.689	0	0	0	0	0	1.838	0	0	0	0	0	0.23	0	37.676
3.2437	24.8108	0	0	7.811	4.135	59.0405	0	0	0	0	0.23	0	0	0.689	52.608	28.716	56.054	27.3378	74.432	5.2838	87.986	0	18.8378	50.0811	0	0	0	0	0	0	0	0	0	0	0	0	0	0	0	0	1.838	0	0	0	0	0	0.23	0	38.135
3.2531	23.2027	0	0	7.351	3.216	56.0541	0	0	0	0	0	0	0	0.689	54.905	29.865	57.892	30.0946	66.622	4.5946	86.608	0	20.2162	52.1486	0	0	0	0	0	0	0	0	0	0	0	0	0	0	0	0	1.608	0	0	0	0	0	0	0	38.824
3.2624	25.0405	0	0	9.649	2.986	53.9865	0	0	0	0	0	0	0	0.23	51.689	32.851	57.662	28.027	68.689	4.3649	85.919	0	18.1486	47.5541	0	0	0	0	0	0	0	0	0	0	0	0	0	0	0	0	1.378	0	0	0	0	0	0.23	0	37.905
3.2718	23.6622	0	0	9.649	3.676	53.0676	0	0	0	0	0	0	0.2297	0.459	52.608	31.703	60.189	26.6486	66.622	4.3649	84.541	0	18.8378	45.7162	0	0	0	0	0	0	0	0	0	0	0	0	0	0	0	0	0.919	0	0	0	0	0	0	0	35.608
3.2812	24.1216	0	0	9.649	2.757	52.3784	0	0	0	0	0	0	0.4595	0.459	51.23	31.932	60.878	27.5676	61.797	3.4459	89.824	0	19.2973	49.8514	0	0	0	0	0	0	0	0	0	0	0	0	0	0	0	0	0.23	0	0	0	0	0	0	0	36.527
3.2906	24.3514	0	0	9.419	2.527	53.9865	0	0	0	0	0	0	0.6892	0	51.23	31.014	58.351	27.3378	58.581	3.4459	89.135	0	19.0676	51.6892	0	0	0	0	0	0	0	0	0	0	0.23	0	0	0	0	0	0	0	0	0	0	0	0	0	34.23
3.2999	25.2703	0	0	9.419	1.608	54.2162	0	0	0	0	0	0	0.6892	0	51.919	25.959	57.203	28.4865	59.27	2.527	91.432	0	20.2162	51.4595	0	0	0	0	0	0	0	0	0	0	0.23	0	0	0	0	0	0	0	0	0	0	0	0	0	34
3.3093	23.8919	0	0	9.189	1.378	54.9054	0.459	0	0	0	0	0	0.6892	0	55.135	21.365	57.203	28.9459	61.338	2.0676	93.5	0	21.1351	54.6757	0	0	0	0	0	0	0	0	0	0	0.23	0	0	0	0	0	0	0	0	0	0	0	0	0	31.932
3.3187	25.5	0	0	8.041	1.838	56.973	0	0	0	0	0	0	0.6892	0	54.446	20.676	57.892	25.7297	61.797	0.9189	92.581	0	22.5135	49.6216	0	0	0	0	0	0	0	0	0	0	0.459	0	0	0	0	0	0	0	0	0	0	0	0	0	30.554
3.3281	26.1892	0	0	7.811	1.378	51.6892	0	0	0	0	0	0	0.4595	0	56.514	18.378	58.122	23.8919	58.811	0.6892	93.73	0	20.9054	46.6351	0.459	0	0	0	0	0	0	0	0	0	0.689	0	0	0	0	0	0	0	0	0	0	0	0	0	28.946
3.3374	26.4189	0	0	9.189	1.149	52.3784	0	0	0	0	0	0	1.6081	0	57.662	16.081	57.203	26.8784	56.514	0.9189	93.959	0	23.2027	47.5541	0.689	0	0	0	0	0	0	0	0	0	0.919	0	0	0	0	0	0	0	0	0	0	0	0	0	29.865
3.3468	26.4189	0	0	7.351	1.608	54.4459	0.23	0	0.2297	0	0	0	2.0676	0	54.446	15.622	60.878	25.0405	52.608	0.2297	96.027	0	24.3514	48.7027	0.459	0	0	0	0	0	0	0	0	0	1.149	0	0	0	0	0	0	0	0	0	0	0	0.23	0	29.176
3.3562	26.6486	0	0	6.432	2.068	53.527	0.459	0	0	0	0	0	2.527	0	55.824	16.77	59.73	24.8108	52.838	0.2297	91.432	0	28.2568	48.7027	0.23	0	0	0	0	0	0	0	0	0	1.378	0	0	0	0	0	0	0	0	0	0	0	0.23	0	28.027
3.3656	28.027	0	0	6.892	2.068	56.7432	1.149	0	0	0	0	0	2.527	0	56.054	15.622	59.041	25.9595	48.243	0.9189	89.824	0	25.5	50.5405	0	0	0	0	0	0	0	0	0.23	0	2.068	0	0	0	0	0	0	0	0	0	0	0	0.459	0	26.189
3.3749	29.4054	0	0	8.73	2.757	54.6757	0.919	0	0	0	0	0	1.6081	0	56.284	16.081	60.649	23.6622	48.703	0.9189	90.743	0	24.1216	50.7703	0	0	0	0	0	0	0	0	0	0	2.297	0	0	0	0	0	0	0	0	0	0	0	0.459	0	27.108
3.3843	26.4189	0	0	8.959	2.297	54.9054	0.459	0	0	0	0	0	0.9189	0	59.959	17.919	59.5	24.3514	46.176	0.9189	90.284	0	24.3514	51.9189	0	0	0	0	0	0	0	0	0	0	2.527	0	0	0	0	0	0	0	0	0	0	0	0	0	26.878
3.3937	27.5676	0	0	11.027	1.838	52.8378	0	0	0	0	0	0	0	0	59.959	17.919	61.568	22.7432	43.189	0	88.676	0	24.3514	49.1622	0	0	0	0	0	0	0	0	0	0	2.068	0	0	0	0	0	0	0	0	0	0	0	0	0	28.027
3.4031	30.0946	0	0	9.878	1.608	50.3108	0.459	0	0	0	0	0	0	0	61.108	16.541	60.419	24.5811	44.568	0.2297	84.541	0	24.1216	46.4054	0	0.23	0	0	0	0	0	0	0	0	2.297	0	0	0	0	0	0	0	0	0	0	0	0	0	27.108
3.4124	29.1757	0	0	9.878	0.919	48.473	0.919	0	0	0	0	0	0.4595	0.23	60.419	15.622	60.878	25.9595	40.662	0	84.311	0	24.3514	47.3243	0	0.459	0	0	0	0	0	0	0	0	2.297	0	0	0	0	0	0	0	0	0	0	0	0	0	27.797
3.4218	28.2568	0	0	10.568	0.689	48.7027	0.919	0	0	0	0	0	0.4595	0	56.054	14.703	63.405	25.5	36.986	0	79.946	0	24.3514	46.6351	0	0.23	0	0	0	0	0	0	0	0	2.527	0	0	0	0	0	0	0	0	0	0	0	0	0	30.324
3.4312	30.3243	0	0	10.338	1.149	44.3378	0.459	0	0	0	0	0	0.4595	0.23	59.041	12.405	64.784	26.6486	35.838	0	82.703	0	23.4324	48.473	0	0.23	0	0	0	0	0	0	0	0	2.297	0	0	0	0	0	0	0	0	0	0	0	0	0	30.095
3.4406	29.6351	0	0	11.257	0.919	43.6486	0.689	0	0	0	0	0	0	0.23	59.5	12.176	66.392	26.8784	34.23	0	86.608	0	24.8108	48.9324	0	0	0	0	0	0	0	0	0	0	2.297	0	0	0	0	0	0	0	0	0	0	0	0	0	28.946
3.4499	31.0135	0	0	11.716	2.297	39.7432	0.689	0	0	0	0	0	0.2297	0.23	58.581	12.176	68.919	26.4189	33.311	0	82.473	0	24.8108	49.1622	0	0	0	0	0	0	0	0	0	0	2.297	0	0	0	0	0	0	0	0	0	0	0	0	0	28.946
3.4593	33.5405	0	0	11.716	4.135	38.5946	1.378	0	0	0	0	0	0	0.459	56.973	11.946	65.932	31.0135	33.541	0	79.027	0	25.5	48.2432	0	0	0	0	0	0	0	0	0	0	1.608	0	0	0	0	0	0	0	0	0.23	0.23	0	0	0	26.189
3.4687	35.3784	0	0	12.865	5.054	37.4459	1.378	0	0	0	0	0	0.2297	0	55.595	10.338	65.932	32.1622	34.689	0	76.5	0	22.5135	48.7027	0	0	0	0	0	0	0	0	0	0	1.608	0	0	0	0	0	0	0	0	0	0	0	0	0	25.041
3.4781	38.3649	0	0	11.716	5.054	34.6892	1.838	0	0	0	0	0	0	0.23	59.73	7.811	60.649	30.7838	38.595	0	74.892	0	22.973	47.7838	0	0	0	0	0	0	0	0	0	0	0.919	0	0	0	0	0	0	0.23	0	0.459	0.459	0	0	0	26.878
3.4874	36.0676	0	0	11.027	5.973	34.9189	2.297	0	0	0	0	0	0	0.23	57.892	6.662	57.892	28.9459	36.527	0.4595	74.892	0	21.3649	51.6892	0	0	0	0	0	0	0	0.23	0	0	0	0	0	0	0	0	0	0.23	0	0	0	0	0	0	26.649
3.4968	38.1351	0	0	9.878	6.432	34.9189	1.838	0	0	0	0	0	0	0	56.973	4.595	60.189	31.0135	35.149	0.6892	79.946	0	19.0676	47.0946	0	0	0	0	0	0	0	0	0	0	0	0	0	0	0	0	0	0	0	0	0	0	0	0	25.959
3.5062	37.4459	0	0	9.649	5.054	34.2297	1.608	0	0	0	0	0	0	0	55.595	4.365	62.027	30.7838	35.838	0.9189	84.081	0	19.527	48.9324	0	0	0	0	0	0	0	0	0	0	0	0	0	0	0	0	0	0	0	0	0	0	0	0	24.122
3.5156	37.4459	0	0	9.649	3.676	32.1622	1.378	0	0	0	0	0	0	0	51.459	4.595	59.041	33.0811	37.676	0.4595	78.797	0	20.4459	48.0135	0	0	0	0	0	0	0	0	0	0	0	0	0	0	0	0	0	0	0	0	0	0	0	0	26.878
3.5249	38.5946	0	0	9.419	3.216	33.0811	1.378	0	0	0	0	0	0	0	48.243	5.743	60.419	35.8378	36.757	0.2297	76.73	0	20.6757	45.4865	0	0	0	0	0	0	0	0	0	0	0	0	0	0	0	0	0	0	0	0	0	0	0	0	26.649
3.5343	36.2973	0	0	9.649	1.149	31.473	1.378	0	0	0	0	0	0	0	47.324	6.432	59.041	33.7703	34.689	0	74.432	0	22.0541	45.2568	0	0	0	0	0	0	0	0	0	0	0	0	0	0	0	0	0	0	0	0	0	0	0	0	27.338
3.5437	34.9189	0	0	10.108	1.149	31.0135	1.608	0	0	0	0	0	0	0	45.946	6.203	60.419	33.5405	34.689	0	78.568	0	19.9865	46.6351	0	0	0	0	0	0	0	0	0	0	0	0	0	0	0	0	0	0	0	0	0	0	0	0	26.878
3.5531	35.1486	0	0	9.419	1.378	27.5676	1.149	0	0	0	0	0	0.2297	0	48.243	4.365	59.959	30.7838	32.622	0	79.486	0	16.0811	47.7838	0	0	0	0	0	0	0	0	0	0	0	0	0	0	0	0	0	0	0	0	0	0	0	0	26.878
3.5624	34.9189	0	0	8.041	1.838	24.5811	1.378	0	0	0	0	0	0.4595	0	46.176	2.986	57.432	29.6351	32.162	0	80.405	0	12.4054	48.473	0	0	0	0	0	0	0	0	0	0	0	0	0	0	0	0	0	0	0	0	0	0	0	0	27.338
3.5718	34.4595	0	0	7.581	2.527	24.1216	1.149	0	0	0	0	0	0.6892	0	48.932	1.378	55.824	25.9595	30.095	0	73.973	0	11.4865	48.2432	0	0	0	0	0	0	0	0	0	0	0	0	0	0	0	0	0	0	0	0	0	0	0	0	28.257
3.5812	33.3108	0	0	6.892	2.068	19.9865	0.689	0	0	0	0	0	0.2297	0	48.243	0.459	56.514	24.8108	27.338	0	75.351	0	9.4189	45.2568	0	0	0	0	0	0	0	0	0	0	0	0	0	0	0	0	0	0	0	0	0	0	0	0	27.797
3.5906	33.5405	0	0	6.203	2.068	20.4459	0.459	0	0	0	0	0	0.6892	0	47.784	0.23	58.351	23.2027	27.797	0	72.135	0	10.5676	40.8919	0	0	0	0	0	0	0	0	0	0	0	0	0	0	0	0	0	0	0	0	0	0	0	0	29.176
3.5999	31.7027	0	0	5.514	2.068	20.4459	0.459	0	0	0	0	0	0.4595	0	48.014	0	56.743	29.1757	28.486	0	70.297	0	10.1081	38.1351	0	0	0	0	0	0	0	0	0	0	0	0	0	0	0	0	0	0	0	0	0	0	0	0	28.716
3.6093	29.6351	0	0	5.973	1.838	19.0676	0.459	0	0	0	0	0	0.4595	0	47.324	0	56.054	28.4865	24.351	0	73.284	0	12.1757	39.0541	0	0	0	0	0	0	0	0	0	0	0	0	0	0	0	0	0	0	0	0	0	0	0	0	29.405
3.6187	27.7973	0	0	6.662	0.919	18.3784	0	0	0	0	0	0	0	0	48.014	0.919	56.284	28.2568	19.527	0	79.257	0	11.027	41.3514	0	0	0	0	0	0	0	0	0	0	0	0	0	0	0	0	0	0	0	0	0	0	0	0	28.486
3.6281	32.1622	0	0	6.892	0.919	16.3108	0	0	0	0	0	0	0.4595	0	49.392	1.149	53.297	26.4189	17.459	0	76.73	0	12.6351	43.8784	0	0	0	0	0	0	0	0	0	0	0	0	0	0	0	0	0	0	0	0	0	0	0	0	28.027
3.6374	32.3919	0	0	6.892	1.149	14.473	0	0	0	0	0	0	0.2297	0	48.703	1.838	55.135	25.5	13.554	0	79.946	0	12.6351	42.9595	0	0	0	0	0	0	0	0	0	0	0	0	0	0	0	0	0	0	0	0	0	0	0	0	28.486
3.6468	34.2297	0	0	5.514	1.608	14.0135	0	0	0	0	0	0	0	0	45.716	1.149	51.689	23.2027	14.932	0	81.324	0	14.0135	43.1892	0	0	0	0	0	0	0	0	0	0	0	0	0	0	0	0	0	0	0	0	0	0	0	0	26.878
3.6562	35.6081	0	0	5.284	2.068	9.8784	0	0	0	0	0	0	0.6892	0	44.568	1.378	52.378	21.8243	12.865	0	79.486	0	12.8649	42.7297	0	0	0	0	0	0	0	0	0	0	0	0	0	0	0	0	0	0	0	0	0	0	0	0	29.635
3.6656	36.0676	0	0	5.284	1.378	9.6486	0	0	0	0	0	0	0.6892	0	43.189	2.757	50.77	20.6757	10.797	0	73.284	0	13.0946	42.5	0	0	0	0	0	0	0	0	0	0	0	0	0	0	0	0	0	0	0	0	0	0	0	0	29.176
3.6749	34.6892	0	0	5.284	0.919	8.9595	0	0	0	0	0	0	0.9189	0	39.054	2.757	49.162	22.5135	11.027	0	72.135	0	10.7973	41.5811	0	0	0	0	0	0	0	0	0	0	0	0	0	0	0	0	0	0	0	0	0	0	0	0	29.176
3.6843	35.1486	0	0	5.514	1.378	9.6486	0	0	0	0	0	0	1.6081	0	39.284	1.378	47.095	23.6622	11.257	0	68.919	0	10.1081	39.973	0	0	0	0	0	0	0	0	0	0	0	0	0	0	0	0	0	0	0	0	0	0	0	0	30.324
3.6937	33.5405	0	0	7.122	1.608	8.5	0	0	0	0	0	0	1.1486	0.23	38.135	1.608	47.324	22.973	9.878	0	69.838	0	12.4054	39.2838	0	0	0	0	0	0	0	0	0	0	0	0	0	0	0	0	0	0	0	0	0	0	0	0	29.635
3.7031	37.2162	0	0	7.122	1.608	6.8919	0	0	0	0	0	0	0.6892	0	39.284	1.838	45.946	22.2838	8.27	0	68.23	0	13.7838	39.973	0	0	0	0	0	0	0	0	0	0	0	0	0	0	0	0	0.23	0	0	0	0	0	0	0	27.568
3.7124	34.9189	0	0	5.054	1.149	5.973	0	0	0	0	0	0	1.3784	0	39.284	1.838	42.5	25.5	10.108	0	62.716	0	14.2432	41.1216	0	0	0	0	0	0	0	0	0	0	0	0	0	0	0	0	0.459	0	0	0	0	0	0	0	29.865
3.7218	34.4595	0	0	5.743	1.608	4.3649	0	0	0	0	0	0	1.3784	0	37.446	1.149	42.73	26.1892	9.649	0	63.176	0	13.7838	42.7297	0	0	0	0	0	0	0	0	0	0	0	0	0	0	0	0	0.459	0	0	0	0	0	0	0	30.784
3.7312	35.8378	0	0	5.743	0.919	4.1351	0	0	0	0	0	0	0.9189	0	34.459	0.689	40.662	26.6486	8.959	0	59.041	0	14.0135	43.8784	0	0	0	0	0	0	0	0	0	0	0	0	0	0	0	0	0.23	0	0	0	0	0	0	0	32.162
3.7406	36.7568	0	0	4.595	0.919	4.1351	0	0	0	0	0	0	1.1486	0	33.541	0.919	40.203	25.9595	10.338	0	57.892	0	12.6351	43.6486	0	0	0	0	0	0	0	0	0	0	0	0	0	0	0	0	0	0	0	0	0	0	0	0	31.473
3.7499	34.4595	0	0	4.824	0.919	3.4459	0	0	0	0	0	0	1.1486	0	31.703	0.689	42.041	24.5811	11.257	0	53.986	0	14.2432	43.1892	0	0	0	0	0	0	0	0	0	0	0	0	0	0	0	0	0	0	0	0	0	0	0	0	29.635
3.7593	34.9189	0	0	5.054	1.149	3.6757	0	0	0	0	0	0	0.9189	0	31.014	0.919	42.041	24.1216	10.797	0	51.459	0	14.473	44.1081	0	0	0	0	0	0	0	0	0	0	0	0	0	0	0	0	0	0	0	0.919	0.919	0	0	0	31.243
3.7687	32.8514	0	0	4.135	1.378	3.4459	0	0	0	0	0	0	0.6892	0.23	32.392	2.527	39.514	25.7297	10.108	0	50.081	0	15.3919	49.1622	0	0	0	0	0	0	0	0	0	0	0	0	0	0	0	0	0	0	0	1.378	1.378	0	0	0	29.405
3.7781	32.8514	0	0	4.365	0.919	3.2162	0	0	0	0	0	0	0.2297	0	30.784	3.676	34.459	26.8784	8.041	0	51.23	0	14.7027	46.1757	0	0	0	0	0	0	0	0	0	0	0	0	0	0	0	0	0	0	0	1.378	1.378	0	0	0	28.486
3.7874	34.2297	0	0	3.676	1.149	3.9054	0	0	0	0	0	0	0.2297	0.23	29.635	4.135	31.473	27.7973	6.432	0	45.946	0	15.8514	44.3378	0	0	0	0	0	0	0	0	0	0	0	0	0	0	0	0	0	0	0	0.689	0.689	0	0	0	27.797
3.7968	32.6216	0	0	3.216	2.068	3.2162	0	0	0	0	0	0	0.2297	0	31.473	3.676	30.554	27.1081	4.824	0.2297	46.405	0	15.1622	43.8784	0	0	0	0	0	0	0	0	0	0	0	0	0	0	0	0	0	0	0	0	0	0	0	0	27.797
3.8062	33.5405	0	0	2.986	2.297	2.7568	0	0	0	0	0	0	0.4595	0	32.851	2.986	30.784	27.1081	4.595	0.2297	44.338	0	15.3919	43.4189	0	0	0	0	0	0	0	0	0	0	0	0	0	0	0	0	0	0	0	0	0	0	0	0	27.338
3.8156	36.2973	0	0	3.446	1.608	1.8378	0	0	0	0	0	0	0.4595	0	30.784	2.757	26.878	26.8784	2.297	0	45.946	0	15.6216	43.6486	0	0	0	0	0	0	0	0	0	0	0	0	0	0	0	0	0	0	0	0	0	0	0	0	26.189
3.8249	36.2973	0	0	3.676	0.689	1.8378	0	0	0	0	0	0	0.4595	0	30.324	3.216	25.73	25.9595	2.068	0.6892	45.716	0	16.0811	40.6622	0	0	0	0	0	0	0	0	0	0	0	0	0	0	0	0	0	0	0	0	0	0	0	0	25.73
3.8343	36.7568	0	0	4.365	0.23	0.9189	0	0	0	0	0	0	0.2297	0	29.865	2.757	21.135	25.9595	2.297	0.9189	42.041	0	17.4595	37.2162	0	0	0	0	0	0	0	0	0	0	0	0	0	0	0	0	0	0	0	0	0	0	0	0	26.419
3.8437	37.6757	0	0	4.365	0.689	1.3784	0	0	0	0	0	0	0	0	28.946	1.838	21.135	25.2703	0.689	0.9189	40.203	0	18.6081	36.7568	0	0	0	0	0	0	0	0	0	0	0	0	0	0	0	0	0	0	0	0	0	0.23	0	0	26.878
3.853	36.527	0	0	3.676	1.149	1.8378	0	0	0	0	0	0	0	0	27.108	2.068	21.595	23.4324	0.919	0.4595	39.284	0	18.3784	36.0676	0	0	0	0	0	0	0	0	0	0	0	0	0	0	0	0	0	0	0	0	0	0	0	0	25.73
3.8624	38.5946	0	0	3.905	1.378	1.8378	0	0	0	0	0	0	0	0	27.108	1.838	19.986	21.3649	0.919	0	38.824	0	18.3784	36.2973	0	0	0	0	0	0	0	0	0	0	0	0	0	0	0	0	0	0	0	0	0	0	0	0	24.351
3.8718	38.8243	0	0	3.676	0.689	2.2973	0	0	0	0	0	0	0	0	26.189	1.838	20.216	22.0541	1.608	0	38.595	0	17.2297	34.9189	0	0	0	0	0	0	0	0	0	0	0	0	0	0	0	0	0	0	0	0	0	0	0	0	25.27
3.8812	39.5135	0	0	3.216	0.919	2.7568	0	0	0	0	0	0	0	0	28.257	2.068	20.446	22.5135	1.378	0	36.527	0	19.527	34	0	0	0	0	0	0	0	0	0	0	0	0	0	0	0	0	0	0	0	0	0	0	0	0	24.351
3.8905	39.973	0	0	4.135	0.23	2.2973	0	0	0	0	0	0	0	0	27.797	1.378	24.351	22.5135	1.149	0	33.541	0	18.8378	34.6892	0	0	0	0	0	0	0	0	0	0	0	0	0	0	0	0	0	0	0	0	0	0	0	0	24.811
3.8999	40.6622	0	0	4.824	0	1.8378	0	0	0	0	0	0	0	0	25.959	1.149	25.041	22.0541	1.149	0	31.703	0	16.3108	34.4595	0	0	0	0	0	0	0	0	0	0	0	0	0	0	0	0	0	0	0	0	0	0	0	0	23.432
3.9093	37.4459	0	0	4.135	0.23	1.1486	0	0	0	0	0	0	0	0.459	28.716	1.149	24.581	21.3649	1.149	0	30.095	0	15.3919	33.3108	0	0	0	0	0	0	0	0	0	0	0	0	0	0	0	0	0	0	0	0	0	0	0	0	23.432
3.9187	39.2838	0	0	4.365	0.689	0.9189	0	0	0	0	0	0	0	0.459	25.73	0.689	23.432	22.0541	2.068	0	24.581	0	15.1622	31.9324	0	0	0	0	0	0	0	0	0	0	0	0	0	0	0	0	0	0	0	0	0	0	0	0	23.203
3.928	43.8784	0	0	4.595	0.689	1.3784	0	0	0	0	0	0	0	0	22.973	0.689	21.135	21.5946	2.068	0	25.5	0	14.0135	31.9324	0	0	0	0	0	0	0	0	0	0	0	0	0	0	0	0	0	0	0	0	0	0	0	0	23.662
3.9374	47.7838	0	0	4.595	0.459	2.0676	0.23	0	0	0	0	0	0	0	23.662	0.689	19.757	20.9054	3.216	0	23.892	0	12.1757	32.8514	0	0	0	0	0	0	0	0	0	0	0	0	0	0	0	0	0	0	0	0	0	0	0	0	23.892
3.9468	44.1081	0	0	3.905	0.23	2.7568	0	0	0	0	0	0	0	0	23.203	1.378	19.757	19.527	3.216	0	21.135	0	12.4054	31.9324	0	0	0	0	0	0	0	0	0	0	0	0	0	0	0	0	0	0	0	0	0	0	0	0	23.432
3.9562	45.4865	0	0	3.905	0.459	3.4459	0.23	0	0	0	0	0	0	0	19.297	1.378	17.459	22.2838	2.757	0	20.446	0	10.5676	30.0946	0	0	0	0	0	0	0	0	0	0	0	0	0	0	0	0	0	0	0	0	0	0	0	0	21.824
3.9655	44.3378	0	0	3.446	0.23	4.1351	0	0	0	0	0	0	0	0	19.527	1.378	18.838	19.2973	3.446	0	22.743	0	8.7297	28.2568	0	0	0	0	0	0	0	0	0	0	0	0.23	0	0	0	0	0	0	0	0	0	0	0	0	22.284
3.9749	44.7973	0	0	4.365	0	4.8243	0	0	0	0	0	0	0	0	17.23	0.689	19.527	18.6081	2.986	0	21.365	0	8.7297	28.2568	0.23	0	0	0	0	0	0	0	0	0	0	0	0	0	0	0	0	0	0	0	0	0	0	0	22.973
3.9843	44.5676	0	0	4.135	0	4.5946	0	0	0	0	0	0	0.2297	0	17.459	0.459	19.297	17.4595	2.527	0	20.446	0	9.8784	26.4189	0.459	0	0	0	0	0	0	0	0	0	0	0	0	0	0	0	0	0	0	0	0	0	0	0	23.892
3.9937	44.5676	0	0	4.135	0	4.3649	0	0	0	0	0	0	0.2297	0.23	17.689	0	19.527	16.5405	1.608	0	19.757	0	12.6351	27.1081	0	0	0	0	0	0	0	0	0	0	0	0	0	0	0	0	0	0	0	0	0	0	0	0	23.892
4.003	48.2432	0	0	3.676	0	3.4459	0	0	0	0	0	0	0.2297	0	15.622	0.23	19.986	17.2297	1.608	0	17.23	0	16.0811	28.7162	0	0	0	0	0	0	0	0	0	0	0	0	0	0	0	0	0	0	0	0	0	0	0	0	23.892
4.0124	47.3243	0	0	3.676	0	2.2973	0	0	0	0	0	0	0	0	16.77	0.459	20.216	16.3108	1.838	0	14.703	0	16.7703	29.1757	0	0	0	0	0	0	0	0	0	0	0	0	0	0	0	0	0	0	0	0	0	0	0	0	24.351
4.0218	50.5405	0	0	3.446	0.23	2.2973	0	0	0	0	0	0	0	0	15.851	1.378	19.986	16.0811	1.149	0	15.622	0	17.4595	28.2568	0	0	0	0	0	0	0	0	0	0	0	0.689	0	0	0	0	0	0	0	0	0	0	0	0	24.122
4.0312	47.7838	0	0	2.986	0.459	3.9054	0	0	0	0	0	0	0.2297	0	15.162	1.149	19.068	17.2297	0.919	0	16.311	0	18.3784	31.9324	0	0	0	0	0	0	0	0	0	0	0	1.149	0	0	0	0	0	0	0	0	0	0	0	0	25.041
4.0405	49.1622	0	0	2.527	0.919	5.2838	0	0	0	0	0	0	0.4595	0	15.162	0.689	19.068	15.8514	1.149	0	16.311	0	19.0676	28.027	0	0	0	0	0	0	0	0	0	0	0	1.149	0	0	0	0	0	0	0	0	0	0	0	0	24.122
4.0499	49.3919	0	0	1.838	1.149	7.8108	0	0	0	0	0	0	0.2297	0	12.176	0.459	17	14.2432	1.149	0	15.162	0	20.4459	29.8649	0	0	0	0	0	0	0	0	0	0	0	0.459	0	0	0	0	0	0	0	0	0	0	0	0	25.5
4.0593	49.3919	0	0	1.838	0.689	8.2703	0	0	0	0	0	0	0	0	11.257	1.149	17.23	13.7838	2.068	0	13.324	0	19.9865	29.1757	0	0	0	0	0	0	0	0	0	0	0	0.459	0	0	0	0	0	0	0	0	0	0	0	0	22.973
4.0687	47.0946	0	0	2.527	0.689	7.8108	0	0	0	0	0	0	0	0	11.257	2.068	18.149	16.0811	2.527	0	14.014	0	23.4324	27.7973	0	0	0	0	0	0	0	0	0	0	0	0.23	0	0	0	0	0	0	0	0	0	0	0	0	22.054
4.078	50.0811	0	0	2.297	1.378	7.8108	0	0	0	0	0	0	0.2297	0	10.338	1.608	17.919	15.6216	2.068	0	12.865	0	24.3514	25.2703	0	0	0	0	0	0	0	0	0	0	0	0.689	0	0	0	0	0	0	0	0	0	0	0	0	22.054
4.0874	52.3784	0	0	2.527	1.838	7.3514	0	0	0	0	0	0	0	0	10.568	1.608	17.459	16.0811	1.838	0	14.243	0	24.3514	24.1216	0	0	0	0	0	0	0	0	0	0	0	0.689	0	0	0	0	0	0	0	0	0	0	0	0	21.595
4.0968	50.5405	0	0	2.297	1.838	6.6622	0.23	0	0	0	0	0	0	0	11.027	2.068	17.919	15.6216	1.149	0	14.932	0	25.9595	29.6351	0	0	0	0	0	0	0	0	0	0	0	0.919	0	0	0	0	0	0	0	0	0	0	0	0	21.824
4.1062	49.1622	0	0	2.527	0.919	6.8919	0.919	0	0	0	0	0	0	0	11.257	2.297	16.311	16.0811	0.689	0	14.243	0	24.3514	28.4865	0	0	0	0	0	0	0	0	0	0	0	1.378	0	0	0	0	0.459	0	0	0	0	0	0	0	21.824
4.1155	50.5405	0	0	2.757	1.378	6.4324	1.378	0	0	0	0	0	0	0	9.419	2.527	16.311	16.3108	0.23	0	14.014	0	23.4324	29.1757	0	0	0	0	0	0	0	0	0	0	0	1.838	0	0	0	0	0.689	0	0	0	0	0	0	0	20.676
4.1249	50.5405	0	0	2.757	0.919	6.8919	1.378	0	0	0	0	0	0	0	8.5	2.757	17.689	16.0811	0	0	12.865	0	24.8108	27.5676	0	0	0	0	0	0	0	0	0	0	0	1.608	0	0	0	0	0.459	0	0	0	0	0	0	0	20.216
4.1343	55.5946	0	0	2.757	0.689	5.973	1.149	0	0	0	0	0	0	0	8.959	2.297	18.838	16.7703	0	0	13.095	0	23.6622	28.4865	0	0	0	0	0	0	0	0	0	0	0	1.378	0	0	0	0	0	0	0	0	0	0	0	0	20.905
4.1437	56.2838	0	0	2.757	0.23	5.2838	0.689	0	0	0	0	0	0	0	8.73	2.527	18.378	16.7703	0	0	16.541	0	22.5135	29.8649	0	0	0	0	0	0	0	0	0	0	0	1.378	0	0	0	0	0	0	0	0	0	0	0	0	21.595
4.153	59.0405	0	0	2.757	0	3.6757	0.23	0	0	0	0	0	0	0	8.73	1.838	18.838	17.2297	0	0	17	0	21.5946	25.2703	0	0	0	0	0	0	0	0	0	0	0	1.149	0	0	0	0	0	0	0	0	0	0	0	0	21.824
4.1624	56.2838	0	0	2.527	0	3.4459	0.23	0	0	0	0	0	0	0	7.811	2.527	18.608	17.9189	0	0	15.851	0	20.4459	25.9595	0	0	0	0	0	0	0	0	0	0	0	1.149	0	0	0	0	0	0	0	0	0	0	0	0	21.365
4.1718	55.8243	0	0	2.297	0	2.9865	0	0	0	0	0	0	0	0	7.122	2.986	18.149	17.2297	0	0	15.162	0	22.0541	23.2027	0	0	0	0	0	0	0	0	0	0	0	1.149	0	0	0	0	0	0	0	0	0	0	0	0	22.743
4.1812	53.527	0	0	2.757	0	2.527	0	0	0	0	0	0	0	0	8.27	2.068	18.838	18.8378	0	0	17	0	23.6622	22.0541	0	0	0	0	0	0	0	0	0	0	0	1.149	0	0	0	0	0	0	0	0	0	0	0	0	22.054
4.1905	59.2703	0	0	2.527	0	2.0676	0	0	0	0	0	0	0.2297	0	7.811	2.297	17.689	18.3784	0.23	0	17.459	0	22.5135	21.8243	0	0	0	0	0	0	0	0	0	0	0	1.149	0	0	0	0	0	0	0	0	0	0	0	0	24.351
4.1999	58.3514	0	0	2.068	0	1.6081	0	0	0	0	0	0	0.9189	0	6.203	2.757	18.149	18.8378	0.689	0	19.986	0	24.1216	22.2838	0	0	0	0	0	0.23	0	0	0	0	0	1.149	0	0	0	0	0	0	0	0	0	0	0	0	24.351
4.2093	60.6486	0	0	1.608	0	0.4595	0	0	0	0	0	0	0.9189	0	6.432	3.216	17.459	21.5946	0.689	0	21.135	0	23.2027	22.973	0	0	0	0	0	0.459	0	0	0	0	0	1.149	0	0	0	0	0	0	0	0	0	0	0	0	25.27
4.2187	63.6351	0	0	2.068	0	0	0.23	0	0	0	0	0	0.9189	0	5.284	3.216	16.77	21.3649	0.459	0	20.446	0	22.5135	24.3514	0	0	0	0	0	0.23	0	0	0	0	0	0.689	0	0	0	0	0	0	0	0	0	0	0	0	24.811
4.228	65.473	0	0	1.838	0	0	0.23	0	0	0	0	0	1.1486	0	3.446	2.757	17	19.7568	0.689	0	22.514	0	20.2162	20.2162	0	0	0	0	0	0	0	0	0	0	0	0.459	0	0	0	0	0	0	0	0	0	0	0	0	23.892
4.2374	62.2568	0	0	0.919	0	0	0	0	0	0	0	0	1.1486	0	2.986	2.757	15.162	18.6081	0.459	0	21.135	0	17.4595	18.8378	0	0	0	0	0	0	0	0	0	0	0	0.23	0	0	0	0	0	0	0	0	0	0	0	0	23.892
4.2468	62.9459	0	0	0.689	0	0	0	0	0	0	0	0	1.3784	0	0.919	2.757	16.081	18.8378	0.23	0.2297	21.135	0	16.7703	17.6892	0	0	0	0	0	0	0	0	0	0	0	0	0	0	0	0	0	0	0	0	0	0	0	0	22.973
4.2562	62.4865	0	0	1.149	0	0	0	0	0	0	0	0	0.9189	0	0	2.297	14.473	20.9054	0.23	0	21.595	0	15.1622	17.2297	0	0	0	0	0	0	0	0	0	0	0.23	0	0	0	0	0	0	0	0	0	0	0	0	0	23.432
4.2655	64.3243	0	0	0.689	0	0	0	0	0	0	0	0	0.2297	0	0.23	1.838	13.324	22.7432	0	0	21.595	0	15.3919	15.8514	0	0	0	0	0	0	0	0	0	0	0	0	0	0	0	0	0	0	0	0	0	0	0	0	22.973
4.2749	64.3243	0	0	1.149	0	0	0	0	0	0	0	0	0	0	0.23	2.068	13.095	23.2027	0.23	0	24.122	0	14.7027	15.8514	0	0	0	0	0	0	0	0	0	0	0	0	0	0	0	0	0	0	0	0	0	0	0	0	23.432
4.2843	66.6216	0	0	1.608	0	0	0	0	0	0	0	0	0	0	0.919	2.068	13.324	22.2838	0.689	0	24.581	0	15.6216	14.9324	0	0	0	0	0	0	0	0	0	0	0	0	0	0	0	0	0	0	0	0	0	0	0	0	23.662
4.2937	65.9324	0	0	2.068	0	0	0	0	0	0	0	0	0.2297	0	1.608	1.838	13.324	23.4324	0.689	0	26.419	0	13.7838	16.7703	0	0	0	0	0	0	0	0	0	0	0	0	0	0	0	0	0	0	0	0	0	0	0	0	22.973
4.303	62.9459	0	0	1.838	0	0	0	0	0	0	0	0	0.2297	0	1.149	1.838	14.243	24.5811	0.919	0	25.041	0	15.1622	17.9189	0	0	0	0	0	0	0	0	0	0	0	0.23	0	0	0	0	0	0	0	0	0	0	0	0	22.284
4.3124	60.8784	0	0	1.838	0	0	0	0	0	0	0	0	0.4595	0	0.689	2.527	14.932	23.6622	1.149	0	23.432	0	15.3919	16.7703	0	0	0	0	0	0	0	0	0	0	0	0	0	0	0	0	0	0	0	0	0	0	0	0	22.514
4.3218	63.4054	0	0	2.527	0	0	0	0	0	0	0	0	0.4595	0	1.378	3.676	14.243	22.0541	0.919	0	22.514	0	15.3919	16.0811	0	0	0	0	0	0	0	0	0	0	0	0	0	0	0	0	0	0	0	0	0	0	0	0	21.135
4.3312	62.027	0	0	2.757	0	0	0	0	0	0	0	0	0.6892	0	0.689	3.905	14.703	20.4459	0.459	0	20.676	0	13.7838	15.6216	0	0	0	0	0	0	0	0	0	0	0	0	0	0	0	0	0	0	0	0	0	0	0	0	21.595
4.3405	65.7027	0	0	2.986	0	0	0	0	0	0	0	0	0.4595	0	0.23	4.365	13.554	20.6757	0.23	0	19.068	0	16.5405	17.4595	0	0	0	0	0	0	0	0	0	0	0	0	0	0	0	0	0	0	0	0	0	0.23	0	0	21.135
4.3499	66.8513	0	0	3.905	0.23	0	0	0	0	0	0	0	0.4595	0	0	3.676	14.014	19.9865	0	0	18.378	0	16.3108	17.2297	0	0	0	0	0	0	0	0	0	0	0	0	0	0	0	0	0	0	0	0	0	0	0	0	22.284
4.3593	62.4865	0	0	3.446	0.23	0	0	0	0	0	0	0	0.6892	0	0.23	3.216	13.324	18.1486	0	0	19.068	0	16.7703	14.2432	0	0	0	0.23	0	0	0	0	0	0	0	0	0	0	0	0	0	0	0	0	0	0	0	0	21.824
4.3687	58.3514	0	0	2.757	0.23	0	0	0	0	0	0	0	1.1486	0	0.23	3.446	13.324	17	0	0	18.149	0	18.3784	15.1622	0	0	0	0.459	0	0	0	0	0	0	0	0	0	0	0	0	0	0	0	0	0	0.459	0	0	22.514
4.378	61.3378	0	0	2.297	0.23	0	0.23	0	0	0	0	0	0.4595	0	0.459	2.757	13.095	12.8649	0	0	17.459	0	17.9189	14.9324	0	0.23	0	0.23	0	0	0	0	0	0	0	0	0	0	0	0	0	0	0	0	0	0.459	0	0	22.514
4.3874	62.9459	0	0	1.838	0	0	0	0	0	0	0	0	0.9189	0	0.459	3.216	13.554	13.0946	0	0	17.689	0	17.6892	15.1622	0	0	0	0	0	0	0	0	0	0	0	0	0	0	0	0	0	0	0	0	0	0.459	0	0	23.432
4.3968	62.9459	0	0	2.527	0	0	0	0	0	0	0	0	0.9189	0	1.608	2.757	14.243	12.4054	0	0	18.378	0	19.0676	14.7027	0	0.23	0	0	0	0	0	0	0	0	0	0	0	0	0	0	0	0	0	0	0	0	0	0	23.662
4.4062	63.1757	0	0	1.378	0	0	0	0	0	0	0	0	0.9189	0	1.608	3.905	14.014	11.4865	0	0	17.919	0	18.8378	15.6216	0	0	0	0	0	0	0	0	0	0	0	0	0	0	0	0	0	0	0	0	0	0	0	0	23.203
4.4155	62.2568	0	0	1.378	0	0	0	0	0	0	0	0	0.9189	0	1.838	3.676	13.554	10.7973	0	0	18.378	0	21.1351	15.6216	0	0	0	0	0	0	0	0	0	0	0	0	0	0	0	0	0	0	0	0	0	0	0	0	24.811
4.4249	58.1216	0	0	1.149	0	0	0.23	0	0.2297	0	0	0	0.9189	0	2.068	2.986	14.932	9.1892	0	0	17.459	0	20.2162	13.5541	0	0	0	0	0	0	0	0	0	0	0	0	0	0	0	0	0	0	0	0	0	0	0	0	22.973
4.4343	63.6351	0	0	1.149	0	0	0.23	0	0	0	0	0	0.9189	0	2.986	2.527	14.703	7.5811	0	0	16.081	0	18.8378	13.3243	0	0	0	0	0	0	0	0	0	0	0	0	0	0	0	0	0	0	0	0	0	0	0	0	22.973
4.4437	59.0405	0	0	0.689	0	0	0.689	0	0	0	0	0	1.3784	0	2.757	2.527	14.932	8.0405	0	0	11.486	0	19.527	14.473	0	0	0	0	0	0	0	0	0	0	0	0	0	0	0	0	0	0	0	0	0	0.23	0	0	22.514
4.453	60.4189	0	0	0.689	0.459	0	0.459	0	0	0	0	0	1.6081	0	3.446	2.297	15.851	8.0405	0.23	0	12.405	0	19.527	14.7027	0	0	0	0	0	0	0	0	0	0	0	0	0	0	0	0	0	0	0	0	0	0	0	0	22.514
4.4624	59.0405	0	0	1.149	0.689	0	0.23	0	0	0	0	0	1.3784	0	2.757	1.608	15.392	10.1081	0.23	0	13.784	0	19.7568	14.0135	0	0	0	0	0	0	0	0	0	0	0	0	0	0	0	0	0	0	0	0	0	0	0	0	23.892
4.4718	59.2703	0	0	0.23	0.23	0	0	0	0	0	0	0	1.3784	0	2.297	1.838	14.014	9.6486	0.23	0	13.784	0	21.1351	14.7027	0	0	0	0	0	0	0	0	0	0	0	0	0	0	0	0	0	0	0	0	0	0	0	0	22.743
4.4812	60.8784	0	0	0	0	0	0.23	0	0	0	0	0	1.1486	0	1.608	1.608	12.405	10.5676	0	0	13.784	0	22.5135	15.6216	0	0	0	0	0	0	0	0	0	0	0	0	0	0	0	0	0	0	0	0	0	0	0	0	22.054
4.4905	59.2703	0	0	0	0	0	0.23	0	0	0	0	0	0.9189	0	1.608	1.608	11.486	10.1081	0	0	11.486	0	20.9054	13.7838	0	0	0	0	0	0	0	0	0	0	0	0	0	0	0	0	0	0	0	0	0	0	0	0	21.824
4.4999	58.3514	0	0	0	0	0	0	0	0	0	0	0	0.6892	0	1.378	3.216	10.568	9.6486	0	0	11.027	0	19.527	12.8649	0	0	0	0	0	0	0	0	0	0	0	0	0	0	0	0	0	0	0	0	0	0	0	0	21.365
4.5093	57.2027	0	0	0	0	0	0	0	0	0	0	0	0.4595	0	0.919	2.757	10.108	7.8108	0	0	12.176	0	19.0676	14.2432	0	0	0	0	0	0	0	0	0	0	0	0	0	0	0	0	0	0	0	0	0	0	0	0	21.824
4.5187	52.6081	0	0	0	0	0	0	0	0	0	0	0	0.2297	0	0.689	2.527	10.568	9.1892	0	0	11.946	0	19.527	14.0135	0	0	0	0	0	0	0	0	0	0	0	0	0	0	0	0	0	0	0	0	0	0	0	0	21.135
4.528	58.3514	0	0	0	0	0	0	0	0	0	0	0	0.6892	0	1.149	1.378	10.568	8.9595	0	0	12.176	0	20.9054	13.7838	0	0	0	0	0	0	0	0	0	0	0	0	0	0	0	0	0	0	0	0	0	0	0	0	20.216
4.5374	59.9595	0	0	0	0	0	0	0	0	0	0	0	0.4595	0	0.919	1.378	9.878	9.4189	0	0	8.27	0	22.0541	13.5541	0	0	0	0	0	0	0	0	0	0	0	0	0	0	0	0	0	0	0	0	0	0	0	0	20.905
4.5468	57.6622	0	0	0	0	0	0	0	0	0	0	0	0.2297	0	1.838	1.838	9.419	9.4189	0	0	10.108	0	20.6757	14.0135	0	0	0	0	0	0	0	0	0	0	0	0	0	0	0	0	0	0	0	0	0	0	0	0	20.216
4.5562	57.8919	0	0	0	0.23	0	0	0	0	0	0	0	0.4595	0	2.297	1.838	9.189	8.0405	0	0	9.878	0	21.5946	15.6216	0	0	0	0	0	0	0	0	0	0	0	0	0	0	0	0	0	0	0	0	0	0	0	0	19.297
4.5655	58.1216	0	0	0	0.689	0	0	0	0	0	0	0	0.9189	0	2.297	1.378	9.189	6.8919	0	0	9.649	0	19.9865	19.0676	0	0	0	0	0	0	0	0	0	0	0	0	0	0	0	0	0	0	0	0	0	0	0	0	19.986
4.5749	56.973	0	0	0	0.689	0	0	0	0	0	0	0	1.3784	0	2.757	1.608	8.27	7.5811	0	0	9.878	0	17.6892	19.527	0	0	0	0	0	0	0	0	0	0	0	0	0	0	0	0	0	0	0	0	0	0	0	0	20.446
4.5843	57.2027	0	0	0	1.608	0	0	0	0	0	0	0	1.6081	0	3.676	1.838	7.811	8.2703	0	0	7.811	0	16.3108	16.5405	0	0	0	0	0	0	0	0	0	0	0	0	0	0	0	0	0	0	0	0	0	0	0	0	19.757
4.5937	56.973	0	0	0	1.838	0	0	0	0	0	0	0	1.8378	0	3.905	1.838	7.811	9.4189	0.23	0	8.959	0	16.7703	14.2432	0	0	0	0	0	0	0	0	0	0	0	0	0	0	0	0	0	0	0	0	0	0	0	0	20.446
4.603	53.9865	0	0	0	1.149	0	0	0	0	0	0	0	1.8378	0	3.676	2.297	8.959	8.5	0	0	9.649	0	16.0811	13.3243	0	0	0	0	0	0	0	0	0	0	0	0	0	0	0	0	0	0	0	0	0	0	0	0	20.905
4.6124	52.3784	0	0	0.23	1.608	0	0	0	0	0	0	0	0.9189	0	2.297	1.608	8.5	7.5811	0.23	0	9.189	0	15.1622	11.4865	0	0	0	0	0	0	0	0	0	0	0	0	0	0	0	0	0	0	0	0	0	0	0	0	19.986
4.6218	52.6081	0	0	0.23	1.608	0	0	0	0	0	0	0	0.4595	0	1.838	1.378	8.73	7.5811	0	0	9.189	0	14.7027	10.7973	0	0	0	0	0	0	0	0	0	0	0	0	0	0	0	0	0	0	0	0	0	0	0	0	18.608
4.6312	52.3784	0	0	0.23	0.689	0	0	0	0	0	0	0	0.2297	0	1.838	1.149	8.959	9.6486	0	0	9.419	0	14.473	8.2703	0	0	0	0	0	0	0	0	0	0	0	0	0	0	0	0	0	0	0	0	0	0	0	0	17.919
4.6405	49.8514	0	0	0	0.689	0	0.23	0	0	0	0	0	0.4595	0	1.838	0.919	7.351	8.9595	0	0	8.5	0	13.7838	7.1216	0	0	0	0	0	0	0	0	0	0	0	0	0	0	0	0	0	0	0	0	0	0	0	0	18.838
4.6499	49.3919	0	0	0	0	0	0.459	0	0	0	0	0	0.4595	0	1.608	0.689	7.351	9.4189	0	0	8.73	0	13.0946	8.7297	0	0	0	0	0	0	0	0	0	0	0	0	0	0	0	0	0	0	0	0	0	0	0	0	18.608
4.6593	48.473	0	0	0	0.689	0	0.689	0	0	0	0	0	1.3784	0	1.608	1.378	6.892	12.4054	0	0	8.73	0	11.4865	7.8108	0	0	0	0	0	0	0	0	0	0	0	0	0	0	0	0	0	0	0	0	0	0	0	0	18.838
4.6687	48.9324	0	0	0	0.919	0	0.459	0	0	0	0	0	1.6081	0	1.378	1.149	6.662	14.0135	0	0	8.73	0	11.4865	8.5	0	0	0	0	0	0	0	0	0	0	0	0	0	0	0	0	0	0	0	0	0	0	0.23	0	17.689
4.678	50.7703	0	0	0	1.378	0	0.689	0	0	0	0	0	1.6081	0.23	0.689	1.378	6.203	17.2297	0	0	9.189	0	12.4054	8.5	0	0	0	0	0	0	0	0	0	0	0	0	0	0	0	0	0	0	0	0	0	0	0.23	0	17
4.6874	51.2297	0	0	0	1.378	0	0.919	0	0	0	0	0	1.1486	0.459	0.23	2.068	5.973	14.9324	0	0	8.27	0	12.4054	8.7297	0	0	0	0	0	0	0	0	0	0	0	0	0	0	0	0	0	0	0	0	0	0	0	0	17
4.6968	49.1622	0	0	0	0.919	0	0.689	0	0	0	0	0	1.6081	0.459	0	2.757	5.743	14.9324	0	0	10.568	0	10.7973	8.0405	0	0	0	0	0	0	0	0	0	0	0	0	0	0	0	0	0	0	0	0	0	0	0	0	17.919
4.7062	49.6216	0	0	0.23	0.459	0	0	0	0	0	0	0	1.3784	0.23	0.459	2.986	5.514	17.9189	0	0	10.797	0	9.8784	8.0405	0	0	0	0	0	0	0	0	0	0	0	0	0	0	0	0	0	0	0	0	0	0	0	0	15.622
4.7155	48.9324	0	0	0.23	0.689	0	0	0	0	0	0	0	0.6892	0	0.23	2.297	5.284	19.7568	0	0	10.568	0	11.027	8.0405	0	0	0	0	0	0	0	0	0	0	0	0	0	0	0	0	0	0	0	0	0	0	0	0	15.851
4.7249	45.4865	0	0	0.23	0.919	0	0	0	0	0	0	0	0.6892	0	0.23	2.757	5.514	20.4459	0	0	10.108	0	11.9459	8.2703	0	0	0	0	0	0	0	0	0	0	0	0	0	0	0	0	0	0	0	0	0	0	0	0	16.311
4.7343	46.1757	0	0	0.689	0.919	0	0	0	0	0	0	0	0.9189	0	0.459	3.216	5.514	19.2973	0	0	9.649	0	12.4054	9.4189	0	0	0	0	0	0	0	0	0	0	0	0	0	0	0	0	0	0	0	0	0	0	0	0	15.392
4.7437	44.7973	0	0	0.919	0.23	0	0	0	0	0	0	0	0.2297	0	0.689	2.986	5.054	20.6757	0	0	9.649	0	11.4865	8.7297	0	0	0	0	0	0	0	0	0	0	0	0	0	0	0	0	0	0	0	0	0	0	0	0	17.459
4.753	40.4324	0	0	1.149	0	0	0	0	0	0	0	0	0	0	0.23	2.068	4.824	19.7568	0	0	7.581	0	10.7973	8.0405	0	0	0	0	0	0	0	0	0	0	0	0	0	0	0	0	0	0	0	0	0	0	0	0	16.081
4.7624	39.2838	0	0	1.149	0	0	0.23	0	0	0	0	0	0	0	0	1.838	4.595	18.3784	0	0	5.743	0	10.1081	8.2703	0	0	0	0	0	0	0	0.23	0	0	0	0	0	0	0	0	0	0	0	0	0	0	0	0	16.541
4.7718	38.3649	0	0	0.689	0	0	0.23	0	0	0	0	0	0	0	0	2.068	3.676	17	0	0	7.351	0	9.1892	8.9595	0	0	0	0	0	0	0	0	0	0	0	0	0	0	0	0	0	0	0	0	0	0	0	0	17
4.7812	39.2838	0	0	0	0	0	0.919	0	0	0	0	0	0	0	0	1.378	3.446	18.8378	0	0	7.811	0	7.1216	9.4189	0	0	0	0	0	0	0	0	0	0	0	0	0	0	0	0	0	0	0	0	0	0	0	0	17
4.7905	37.9054	0	0	0.23	0	0	1.149	0	0	0	0	0	0	0	0.23	1.378	3.446	18.1486	0	0	8.041	0	5.973	7.5811	0	0	0	0	0	0	0	0	0	0	0	0	0	0	0	0	0	0	0	0	0	0	0	0	14.932
4.7999	34.4595	0	0	0.459	0	0	1.149	0	0	0	0	0	0	0	0.459	1.149	3.676	20.4459	0	0	7.581	0	6.2027	7.5811	0	0	0	0	0	0	0	0	0	0	0	0	0	0	0	0	0	0	0	0	0	0	0	0	15.392
4.8093	34.4595	0	0	0.919	0	0	0.919	0	0	0	0	0	0	0	1.608	1.149	3.905	21.1351	0	0	7.122	0	6.4324	6.8919	0	0	0	0	0	0	0	0	0	0	0	0	0	0	0	0	0	0	0	0	0	0.459	0	0	16.541
4.8187	34.6892	0	0	1.838	0	0	0.459	0	0	0	0	0	0	0	2.068	1.378	4.135	21.3649	0	0	6.892	0	5.973	5.5135	0	0	0	0	0	0	0	0	0	0	0	0	0	0	0	0	0	0	0	0	0	0.459	0	0	17.459
4.828	33.3108	0	0	2.068	0	0	0.23	0	0	0	0	0	0	0	3.216	0.919	3.676	20.6757	0	0	8.041	0	5.0541	4.5946	0	0	0	0	0	0	0	0	0	0	0	0	0	0	0	0	0	0	0	0	0	0.459	0	0	17.919
4.8374	31.7027	0	0	2.068	0	0	0.23	0	0	0	0	0	0	0	3.905	0.919	3.216	20.2162	0	0	8.959	0	4.1351	3.9054	0	0	0	0	0	0	0	0	0	0	0	0	0	0	0	0	0	0	0	0	0	0	0	0	17.689
4.8468	31.2432	0	0	1.838	0	0	0	0	0	0	0	0	0	0	4.135	0.689	2.757	20.4459	0	0	10.797	0	4.1351	4.5946	0	0	0	0	0	0	0	0	0	0	0	0	0	0	0	0	0	0	0	0	0	0	0	0	18.608
4.8562	28.4865	0	0	1.378	0	0	0	0	0	0	0	0	0	0	4.595	0.689	2.757	21.3649	0	0	10.108	0	3.4459	6.4324	0	0	0	0	0	0	0	0	0	0	0	0	0	0	0	0	0	0	0	0	0	0	0	0	20.676
4.8655	29.8649	0	0	1.149	0	0	0	0	0	0	0	0	0	0	4.595	0.459	2.757	22.2838	0	0	11.027	0	3.2162	6.4324	0	0	0	0	0	0	0	0	0	0	0	0	0	0	0	0	0	0	0	0	0	0.459	0	0	20.216
4.8749	29.6351	0	0	0.919	0	0	0	0	0	0	0	0	0.2297	0	5.284	0.689	2.757	22.973	0	0	12.865	0	2.7568	6.6622	0	0	0	0	0	0	0	0	0	0	0	0	0	0	0	0	0	0	0	0	0	0	0	0	20.905
4.8843	29.8649	0	0	0.459	0	0	0	0	0	0	0	0	0.6892	0	4.365	0.459	3.216	21.1351	0	0	10.568	0	2.7568	5.5135	0	0	0	0	0	0	0	0	0	0	0	0	0	0	0	0	0	0	0	0	0	0	0	0	20.676
4.8937	30.0946	0	0	0.459	0	0	0	0	0	0	0	0	0.6892	0	5.054	0.459	2.986	22.5135	0	0	12.176	0	2.2973	5.5135	0	0	0	0	0	0	0	0	0	0	0	0	0	0	0	0	0	0	0	0	0	0.23	0	0	19.757
4.903	29.4054	0	0	0.23	0	0	0	0	0	0	0	0	0.6892	0.459	5.284	0.919	2.757	21.8243	0	0	14.932	0	2.527	5.0541	0	0	0	0	0	0	0	0	0	0	0	0	0	0	0	0	0	0	0	0	0	0	0	0	19.527
4.9124	30.0946	0	0	0	0	0	0	0	0	0	0	0	0.4595	0.459	5.514	0.919	2.068	24.1216	0	0	14.014	0	2.7568	4.8243	0	0	0	0	0	0	0	0	0	0	0	0	0	0	0	0	0	0	0	0	0	0	0	0	19.527
4.9218	30.7838	0	0	0	0	0	0	0	0	0	0	0	0.2297	0	5.284	2.068	1.149	24.8108	0	0	13.324	0	2.2973	4.1351	0	0	0	0	0	0	0	0	0	0	0	0	0	0	0	0	0	0	0	0	0	0	0	0	19.986
4.9312	29.1757	0	0	0	0	0	0	0	0	0	0	0	0.2297	0	5.514	2.297	0.689	28.2568	0	0	13.095	0	2.0676	3.6757	0	0	0	0	0	0	0	0	0	0	0	0	0.23	0	0	0	0	0	0	0	0	0	0	0	19.527
4.9405	28.9459	0	0	0	0	0	0	0	0	0	0	0	0	0	5.743	1.608	0.689	31.2432	0	0	12.865	0	3.6757	4.8243	0	0	0	0	0	0	0	0	0	0	0	0	0.689	0	0	0	0	0	0	0	0	0	0	0	20.676
4.9499	28.2568	0	0	0	0	0	0	0	0	0	0	0	0	0	4.595	2.297	0.23	31.9324	0	0	10.338	0	3.9054	4.1351	0	0	0	0	0	0	0	0	0	0	0	0	0.23	0	0	0	0	0	0	0	0	0.23	0	0	20.905
4.9593	26.6486	0	0	0	0	0	0.23	0	0	0	0	0	0	0	4.824	2.757	0.23	29.6351	0	0	12.405	0	3.2162	3.9054	0	0	0	0	0	0	0	0	0	0	0	0	0	0	0	0	0	0	0	0	0	0.23	0	0	22.054
4.9687	23.6622	0	0	0	0	0	0.23	0	0	0	0	0	0	0	5.514	1.608	0.23	26.8784	0	0	10.797	0	2.7568	2.9865	0	0	0	0	0	0	0	0	0	0	0	0	0	0	0	0	0	0	0	0	0	0	0	0	22.973
4.978	19.0676	0	0	0	0	0	0	0	0	0	0	0	0.4595	0	3.905	2.068	0	28.2568	0	0	12.635	0	4.1351	2.0676	0	0	0	0	0	0	0	0	0	0	0	0	0	0	0	0	0	0	0	0	0	0	0	0	22.743
4.9874	17.2297	0	0	0	0	0	0.23	0	0	0	0	0	0.4595	0	3.676	1.838	0.459	26.4189	0	0	12.176	0	3.9054	1.1486	0	0	0	0	0	0	0	0	0	0	0	0	0	0	0	0	0	0	0	0	0	0	0	0	21.824
4.9968	14.473	0	0	0	0	0	0.459	0	0	0	0	0	0.2297	0	2.986	1.149	0.23	27.3378	0	0	10.568	0	2.2973	2.9865	0	0	0	0	0	0	0	0	0	0	0	0	0	0	0	0	0	0	0	0	0	0	0	0	20.216
5.0062	12.4054	0	0	0	0	0	0.23	0	0	0	0	0	0	0	2.297	1.149	0	30.0946	0	0	12.635	0	2.2973	3.9054	0.23	0	0	0	0	0	0	0	0	0	0	0	0	0	0	0	0	0	0	0	0	0	0	0	20.676
5.0155	10.3378	0	0	0	0	0	0	0	0	0	0	0	0	0	1.838	1.149	0	28.2568	0	0	12.635	0	1.6081	5.0541	0.459	0	0	0	0	0	0	0	0	0	0	0	0	0	0	0	0	0	0	0	0	0	0	0	20.216
5.0249	8.9595	0	0	0	0	0	0	0	0	0	0	0	0	0	0.919	0.919	0	26.6486	0	0	13.095	0	1.6081	4.8243	0.23	0	0	0	0	0	0	0	0	0	0	0	0	0	0	0	0	0	0	0	0	0	0	0	19.757
5.0343	6.2027	0	0	0	0	0	0	0	0	0	0	0	0	0	0.459	0	0	28.027	0	0	11.716	0	1.6081	4.5946	0	0	0	0	0	0	0	0	0	0	0	0	0	0	0	0	0	0	0	0	0	0	0	0	21.595
5.0437	5.5135	0	0	0	0	0	0	0	0.2297	0	0	0	0	0	0	0	0	23.8919	0	0	12.635	0	2.0676	3.2162	0.23	0	0	0	0	0	0	0	0	0	0	0	0	0	0	0	0	0	0	0	0	0	0	0	21.365
5.053	4.8243	0	0	0	0	0	0	0	0	0	0	0	0	0	0	0	0	24.5811	0	0	12.176	0	2.0676	3.6757	0	0	0	0	0	0	0	0	0	0	0	0	0	0	0	0	0	0	0	0	0	0	0	0	21.595
5.0624	5.0541	0	0	0	0	0	0	0	0	0	0	0	0.2297	0	0	0	0	25.0405	0	0	12.176	0	1.8378	3.4459	0	0	0	0	0	0	0	0	0	0	0	0	0	0	0	0	0	0	0	0	0	0	0	0	19.986
5.0718	4.1351	0	0	0	0	0	0	0	0	0	0	0	0	0	0	0	0	27.7973	0	0	11.257	0	2.2973	2.527	0	0	0	0	0	0	0	0	0	0	0	0	0	0	0	0	0	0	0	0	0	0	0	0	18.838
5.0812	2.7568	0	0	0.23	0	0	0	0	0	0	0	0	0	0	0	0	0	28.2568	0.459	0	10.338	0	1.3784	2.527	0	0	0	0	0	0	0	0	0	0	0	0	0	0	0	0	0	0	0	0	0	0	0	0	19.527
5.0905	2.2973	0	0	0.689	0	0	0	0	0	0	0	0	0	0	0	0	0	28.9459	0	0	11.027	0	1.1486	2.527	0	0	0	0	0	0	0	0	0	0	0	0	0	0	0	0	0	0	0	0	0	0	0	0	19.297
5.0999	2.527	0	0	0.23	0.23	0	0	0	0	0	0	0	0	0	0	0	0	27.5676	0	0	10.338	0	1.6081	1.3784	0	0	0	0	0	0	0	0	0	0	0	0	0	0	0	0	0	0	0	0	0	0	0	0	19.757
5.1093	2.7568	0	0	0	0.689	0	0	0	0	0	0	0	0.2297	0	0	0	0	28.2568	0	0	9.649	0	0.6892	1.3784	0	0	0	0	0	0	0	0	0	0	0	0	0	0	0	0	0	0	0	0	0	0	0	0	19.297
5.1186	1.6081	0	0	0	0.919	0	0	0	0	0	0	0	0.2297	0.23	0	0	0	27.3378	0	0	10.568	0	1.8378	1.1486	0	0	0	0	0	0	0	0	0	0	0	0	0	0	0	0	0	0	0	0	0	0	0	0	19.527
5.128	1.1486	0	0	0	0.919	0	0	0	0	0	0	0	0.2297	0	0	0	0	28.7162	0	0	8.959	0	3.6757	1.6081	0	0	0	0	0	0	0	0	0	0	0	0	0	0	0	0	0	0	0	0	0	0	0	0	18.608
5.1374	1.6081	0	0	0	1.149	0	0	0	0	0	0	0	0	0	0	0	0	29.1757	0	0	10.108	0	4.8243	2.527	0	0	0	0	0	0	0	0	0	0	0	0	0	0	0.459	0	0	0	0	0	0	0	0	0	18.378
5.1468	1.3784	0	0	0	0.689	0	0	0	0	0	0	0	0.4595	0	0	0	0.23	29.1757	0	0	8.5	0	4.1351	2.9865	0	0	0	0	0	0	0	0	0	0	0	0	0	0	0.23	0	0	0	0	0	0	0	0	0	18.608
5.1561	1.1486	0	0	0	0	0	0	0	0	0	0	0	0.2297	0	0	0	0.689	29.4054	0	0	10.338	0	3.2162	2.7568	0	0	0	0	0	0	0	0	0	0	0	0	0	0	0	0	0	0	0	0	0	0	0	0	19.297
5.1655	0.9189	0	0	0	0	0	0	0	0	0	0	0	0	0	0	0	0.689	28.7162	0	0	12.865	0	2.7568	3.2162	0	0	0	0	0	0	0	0	0	0	0	0	0	0	0	0	0	0	0	0	0	0	0	0	19.986
5.1749	0.2297	0	0	0	0	0	0	0	0	0	0	0	0	0	0	0	0.689	26.6486	0	0	14.703	0	2.0676	2.2973	0	0	0	0	0	0	0	0	0	0	0	0	0	0	0	0	0	0	0	0	0	0	0	0	20.676
5.1843	0	0	0	0	0	0	0	0	0	0	0	0	0	0	0	0	1.378	26.8784	0	0	11.486	0	2.2973	2.527	0	0	0	0	0	0	0	0	0	0	0	0	0	0	0	0	0	0	0	0	0	0	0	0	19.986
5.1936	0	0	0	0	0	0	0	0	0	0	0	0	0	0	0	0.23	1.838	28.9459	0	0	9.419	0	2.7568	2.527	0	0	0	0	0	0	0	0	0	0	0	0	0	0	0	0	0	0	0	0	0	0	0	0	18.838
5.203	0	0	0	0	0	0	0	0	0	0	0	0	0.4595	0	0	0.459	2.527	30.0946	0	0	11.257	0	3.6757	3.6757	0	0	0	0	0	0	0	0	0	0	0	0	0	0	0.459	0	0	0	0	0	0	0	0	0	19.757
5.2124	0	0	0	0	0	0	0	0	0	0	0	0	0.6892	0.23	0	0.23	2.757	28.2568	0	0	11.946	0	3.9054	4.1351	0	0	0	0	0	0	0	0	0	0	0	0	0	0	0	0	0	0	0	0	0	0	0	0	19.297
5.2218	0	0	0	0	0	0	0	0	0	0	0	0	0.6892	1.149	0	0	1.608	25.9595	0	0	11.716	0	3.2162	3.4459	0	0	0	0	0	0	0	0	0	0	0	0	0	0	0	0	0	0	0	0	0	0	0	0	18.838
5.2311	0	0	0	0	0	0	0	0	0	0	0	0	0.6892	1.378	0	0	2.068	28.4865	0	0	11.257	0	2.9865	2.7568	0	0	0	0	0	0	0	0	0	0	0	0	0	0	0	0	0	0	0	0	0	0	0	0	19.527
5.2405	0	0	0	0	0	0	0	0	0	0	0	0	0.4595	1.149	0	0	2.757	28.027	0	0	10.568	0	3.2162	3.2162	0	0	0	0	0	0	0	0	0	0	0	0	0	0	0	0	0	0	0	0	0	0	0	0	19.297
5.2499	0	0	0	0	0	0	0	0	0	0	0	0	0.2297	0.689	0	0.23	2.297	25.7297	0	0	11.027	0	5.0541	3.2162	0	0	0	0	0	0	0	0	0	0	0	0	0	0	0	0	0	0	0	0	0	0	0	0	19.297
5.2593	0	0	0	0	0	0	0	0	0	0	0	0	0.2297	0	0	0.23	2.527	27.1081	0	0	12.635	0	6.8919	2.9865	0	0	0	0	0	0	0	0	0	0	0	0	0	0	0	0	0	0	0	0	0	0	0	0	19.068
5.2686	0	0	0	0	0	0	0	0	0	0	0	0	0.2297	0	0	0.459	2.068	30.7838	0	0	10.338	0	8.0405	2.0676	0	0	0	0	0	0	0	0	0	0	0	0	0	0	0	0	0	0	0	0	0	0	0	0	19.527
5.278	0	0	0	0	0	0	0	0	0	0	0	0	0.2297	0.459	0	0.459	2.068	30.3243	0	0	10.797	0	8.0405	0.6892	0	0	0	0	0	0	0	0	0	0	0	0	0	0	0	0	0	0	0	0	0	0	0	0	19.986
5.2874	0	0	0	0	0	0	0	0	0	0	0	0	0	0	0	0	3.216	33.3108	0	0	8.959	0	7.1216	0	0	0	0	0	0	0	0	0	0	0	0	0	0	0	0	0	0	0	0	0	0	0	0	0	20.676
5.2968	0	0	0	0	0.23	0	0	0	0	0	0	0	0	0	0	0	3.446	36.0676	0	0	9.419	0	6.8919	0.2297	0	0	0	0	0	0	0	0	0	0	0	0	0	0	0	0	0	0	0	0	0	0	0	0	21.365
5.3061	0	0	0	0	0.919	0	0.23	0	0	0	0	0	0	0	0	0	3.216	36.9865	0	0	11.027	0	6.6622	1.1486	0	0	0	0	0	0	0	0	0	0	0	0	0	0	0	0	0	0	0	0	0	0	0	0	20.446
5.3155	0	0	0	0	0.689	0	0.23	0	0	0	0	0	0.2297	0	0	0	3.446	35.8378	0	0	10.797	0	6.6622	1.3784	0	0	0	0	0	0	0	0	0	0	0	0	0	0	0	0	0	0	0	0	0	0	0	0	19.527
5.3249	0	0	0	0	0.689	0	0.459	0	0	0	0	0	0	0	0	0	2.757	37.6757	0	0	11.946	0	6.8919	2.527	0	0	0	0	0	0	0	0	0	0	0	0	0	0	0	0	0	0	0	0	0	0	0	0	18.608
5.3343	0	0	0	0	0.689	0	0.23	0	0	0	0	0	0.2297	0	0	0	2.527	39.0541	0	0	10.797	0	6.4324	2.527	0	0	0	0	0	0	0	0	0	0	0	0	0	0	0	0	0	0	0	0	0	0	0	0	19.068
5.3436	0	0	0	0	0.23	0	0	0	0	0	0	0	0.2297	0.23	0	0	2.527	41.8108	0	0	11.257	0	7.1216	1.3784	0	0	0	0	0	0	0	0	0	0	0	0	0	0	0	0	0	0	0	0	0	0	0	0	18.149
5.353	0	0	0	0	0.23	0	0.23	0	0	0	0	0	0	0.689	0	0	2.068	42.0405	0	0	13.095	0	7.5811	1.8378	0	0	0	0	0	0	0	0	0	0	0	0	0	0	0	0	0	0	0	0	0	0	0	0	19.068
5.3624	0	0	0	0	0.23	0	0.459	0	0	0	0	0	0.2297	1.378	0	0.23	2.297	41.3514	0	0	11.716	0	7.3514	1.1486	0	0	0	0	0	0	0	0	0	0	0	0	0	0	0	0	0	0	0	0	0	0	0	0	19.757
5.3718	0	0	0	0	0	0	0.459	0	0	0	0	0	0	2.068	0	0.459	2.068	41.1216	0	0	11.027	0	7.8108	1.3784	0	0	0	0	0	0	0	0	0	0	0	0	0	0	0.459	0	0	0	0	0	0	0	0	0	21.824
5.3811	0.2297	0	0	0	0	0	0.689	0	0	0	0	0	0	1.838	0	0.689	2.068	41.8108	0	0	10.568	0	8.7297	1.1486	0	0	0	0	0	0	0	0	0	0	0	0	0	0	0.23	0	0	0	0	0	0	0	0	0	20.905
5.3905	0.4595	0	0	0	0	0	0.459	0	0	0	0	0	0	1.149	0	0.23	2.068	43.6486	0	0	12.405	0	8.9595	0.2297	0	0	0	0	0	0	0	0	0	0	0	0	0	0	0.689	0	0	0	0	0	0	0	0	0	20.446
5.3999	0.2297	0	0	0	0	0	0.459	0	0	0	0	0	0	0.689	0	0	2.297	42.7297	0	0	14.473	0	8.5	1.3784	0	0	0	0	0	0	0	0	0	0	0	0	0	0	0.23	0	0	0	0	0	0	0	0	0	21.135
5.4093	0.4595	0	0	0	0	0	0.459	0	0	0	0	0	0	1.149	0	0	1.838	42.7297	0	0	15.392	0	6.6622	1.1486	0	0	0	0	0	0	0	0	0	0	0	0	0	0	0	0	0	0	0	0	0	0	0	0	21.824
5.4186	0.2297	0	0	0	0	0	0.459	0	0	0	0	0	0	0.919	0	0.23	2.068	43.4189	0	0	14.473	0	7.3514	1.3784	0	0	0	0	0	0	0	0	0	0	0	0	0	0	0	0	0	0	0	0	0	0	0	0	21.595
5.428	0	0	0	0	0	0	0	0	0	0	0	0	0.2297	0.459	0	0	1.838	46.6351	0	0	14.473	0	8.5	0.6892	0	0	0	0	0	0	0	0	0	0	0	0	0	0	0.23	0	0	0	0	0	0	0	0	0	22.743
5.4374	0	0	0	0	0.459	0	0	0	0	0	0	0	0.2297	0	0	0.459	1.608	45.7162	0	0	12.405	0	8.2703	0.9189	0	0	0	0	0	0	0	0	0	0	0	0	0	0	0	0	0	0	0	0	0	0	0	0	22.973
5.4468	0	0	0	0	0	0	0	0	0	0	0	0	0.6892	0	0	0.459	1.149	48.2432	0	0	12.176	0	7.3514	1.1486	0	0	0	0	0	0	0	0	0	0	0	0	0	0	0	0	0	0	0	0	0	0	0	0	21.824
5.4561	0	0	0	0	0.23	0	0	0	0	0	0	0	0.6892	0.23	0	0.459	1.608	47.7838	0	0	11.716	0	8.5	1.1486	0	0.23	0	0	0	0	0	0	0	0	0	0	0	0	0	0	0	0	0	0	0	0	0	0	22.054
5.4655	0	0	0	0	0	0	0	0	0	0	0	0	0.6892	0.23	0	0.23	1.149	49.1622	0	0	11.946	0	8.0405	1.3784	0	0.23	0	0	0	0	0	0	0	0	0	0	0	0	0	0	0	0	0	0	0	0	0	0	22.054
5.4749	0	0	0	0	0.459	0	0	0	0	0	0	0	0.4595	0.689	0	0	1.149	46.6351	0	0	11.716	0	10.1081	1.3784	0	0.459	0	0	0	0	0	0	0	0	0	0	0	0	0	0	0	0	0	0	0	0	0	0	22.973
5.4843	0	0	0	0	0.459	0	0	0.23	0	0	0	0	0.4595	1.149	0	0	0.459	49.8514	0	0	11.946	0	8.7297	2.0676	0	0.23	0	0	0	0	0	0	0	0	0	0	0	0	0.23	0	0	0	0	0	0	0	0	0	22.743
5.4936	0	0	0	0	0.459	0	0	0.459	0	0	0	0	0	1.608	0	0	0.23	51	0	0	11.027	0	8.9595	1.8378	0	0	0	0	0	0	0	0	0	0	0	0	0	0	0	0	0	0	0	0	0	0	0	0	23.203
5.503	0	0	0	0	0.23	0	0	0.23	0	0	0	0	0	0.689	0.23	0	0.23	51.6892	0	0	8.959	0	10.1081	1.8378	0	0	0	0	0	0	0	0	0	0	0	0	0	0	0	0	0	0	0	0	0	0	0	0	23.432
5.5124	0	0	0	0	0	0	0.23	0	0	0	0	0	0	0.459	0.689	0	0.919	52.6081	0	0	9.189	0	11.4865	3.4459	0	0	0	0	0	0	0	0	0	0	0	0	0	0	0	0	0	0	0	0	0	0	0	0	23.662
5.5218	0	0	0	0	0	0	0.23	0	0	0	0	0	0	0.459	1.378	0	0.919	52.3784	0	0	10.108	0	9.6486	3.6757	0	0	0	0	0	0	0	0	0	0	0	0	0	0	0	0	0	0	0	0	0	0	0	0	24.122
5.5311	0	0	0	0	0	0	0	0	0	0	0	0	0	0.23	2.068	0	0.689	54.2162	0	0	10.568	0	10.1081	3.2162	0	0	0	0	0	0	0	0	0	0	0	0	0	0	0	0	0	0	0	0	0	0	0	0	23.432
5.5405	0	0	0	0	0	0	0	0.23	0	0	0	0	0	0	2.527	0	0.23	51.2297	0	0	10.797	0	9.1892	2.9865	0	0	0	0	0	0	0	0	0	0	0	0	0	0	0	0	0	0	0	0	0	0	0	0	22.743
5.5499	0	0	0	0	0	0	0	0.23	0	0	0	0	0	0	3.216	0	0	48.9324	0	0	11.946	0	8.0405	1.6081	0	0	0	0	0	0	0	0	0	0	0	0	0	0	0	0	0	0	0	0	0	0	0	0	22.743
5.5593	0	0	0	0	0	0	0	0.23	0	0	0	0	0	0	3.676	0	0	45.027	0	0	12.405	0	7.5811	0.6892	0	0	0	0	0	0	0	0	0	0	0	0	0	0	0	0	0	0	0	0	0	0	0	0	24.581
5.5686	0	0	0	0	0.23	0	0	0	0	0	0	0	0	0	4.365	0	0	48.2432	0	0	14.932	0	7.3514	0.2297	0	0	0	0	0	0	0	0	0	0	0	0	0	0	0	0	0	0	0	0	0	0	0	0	25.73
5.578	0	0	0	0	0	0	0	0	0	0	0	0	0	0	4.595	0	0	48.0135	0	0	17.919	0	9.1892	0	0	0	0	0	0	0	0	0	0	0	0	0	0	0	0	0	0	0	0	0	0	0	0	0	25.27
5.5874	0	0	0	0	0	0	0	0	0	0	0	0	0.2297	0	4.365	0.23	0	46.6351	0	0	18.608	0	8.2703	0.4595	0	0	0	0	0	0	0	0	0	0	0	0	0	0	0	0	0	0	0	0	0	0	0	0	27.338
5.5968	0	0	0	0	0	0	0	0	0	0	0	0	0	0	4.135	0	0	43.8784	0	0	18.378	0	7.5811	0.9189	0	0	0	0	0	0	0	0	0	0	0	0	0	0	0	0	0	0	0	0	0	0	0	0	26.649
5.6061	0	0	0	0	0	0	0	0	0	0	0	0	0	0	4.365	0	0	40.2027	0	0	16.311	0	6.4324	1.1486	0	0	0	0	0	0	0	0	0	0	0	0	0	0	0	0	0	0	0	0	0	0	0	0	26.189
5.6155	0	0	0	0	0	0	0	0	0	0	0	0	0.2297	0	4.365	0	0	42.0405	0	0	18.149	0	8.2703	1.3784	0	0	0	0	0	0	0	0	0	0	0	0	0	0	0	0	0	0	0	0	0	0	0	0	26.189
5.6249	0	0	0	0	0	0	0	0	0	0	0	0	0.4595	0.23	4.365	0	0	40.8919	0	0	17	0	8.0405	0.9189	0	0	0	0	0	0	0	0	0	0	0	0	0	0	0	0	0	0	0	0	0	0	0	0	26.878
5.6343	0	0	0	0	0	0	0.23	0	0	0	0	0	0.2297	0	3.676	0	0	41.3514	0	0	18.608	0	6.8919	0.2297	0	0	0	0	0	0	0	0	0	0	0	0	0	0	0.23	0	0	0	0	0	0	0	0	0	25.5
5.6436	0	0	0	0	0.23	0	0	0	0	0	0	0	0	0	3.905	0	0.23	40.6622	0	0	18.378	0	5.5135	0	0	0	0	0	0	0	0	0	0	0	0	0	0	0	0	0	0	0	0	0	0	0	0	0	27.108
5.653	0	0	0	0	0	0	0	0	0	0	0	0	0	0	3.216	0	0.689	41.8108	0	0	19.297	0	5.5135	0	0	0	0	0	0	0	0	0	0	0	0	0	0	0	0	0	0	0	0	0.23	0.23	0	0	0	27.568
5.6624	0	0	0	0	0	0	0	0	0	0	0	0	0	0	3.216	0	1.149	40.6622	0	0	18.378	0	5.7432	0	0	0	0	0	0	0	0	0	0	0	0	0	0	0	0	0	0	0	0	0	0	0	0	0	27.108
5.6718	0	0	0	0	0	0	0	0	0	0	0	0	0	0	2.986	0	1.378	43.4189	0	0	19.068	0	5.2838	0	0	0	0	0	0	0	0	0	0	0	0	0	0	0	0	0	0	0	0	0	0	0	0	0	26.878
5.6811	0	0	0	0	0	0	0	0	0	0	0	0	0	0	3.216	0	0.919	41.8108	0	0	19.297	0	5.5135	0	0	0	0	0	0	0	0	0	0	0	0	0	0	0	0.23	0	0	0	0	0	0	0	0	0	25.73
5.6905	0	0	0	0	0	0	0	0	0	0	0	0	0	0	2.297	0	0.689	39.5135	0	0	20.676	0	4.5946	0	0	0	0	0	0	0	0	0	0	0	0	0	0	0	0	0	0	0	0	0	0	0	0	0	27.108
5.6999	0	0	0	0	0	0	0	0	0	0	0	0	0	0	2.297	0.459	0.459	33.3108	0	0	22.514	0	5.973	0	0	0	0	0	0	0	0	0	0	0	0	0	0	0	0.23	0	0	0	0	0	0	0	0	0	28.946
5.7093	0	0	0	0	0	0	0	0	0	0	0	0	0	0	2.068	0.23	0.23	34.2297	0	0	21.824	0	6.6622	0	0	0	0	0	0	0	0	0	0	0	0	0	0	0	0	0	0	0	0	0	0	0	0	0	28.946
5.7186	0	0	0	0	0	0	0	0	0	0	0	0	0	0	0.459	0	0	34.6892	0	0	20.216	0	6.2027	0	0	0	0	0	0	0	0	0	0	0	0	0	0	0	0	0	0	0	0	0	0	0	0	0	28.257
5.728	0.2297	0	0	0	0	0	0	0	0	0.459	0	0	0	0	0.459	0	0	34.4595	0	0	18.378	0	4.8243	0	0	0	0	0	0	0	0	0	0	0	0	0	0	0	0	0	0	0	0	0	0	0	0	0	28.716
5.7374	0	0	0	0	0	0	0.689	0	0	0.919	0	0	0	0	0	0	0	33.0811	0	0	16.541	0	4.1351	0	0	0.23	0	0	0	0	0	0	0	0	0	0	0	0	0	0	0	0	0	0	0	0	0	0	28.486
5.7468	0.2297	0	0	0	0	0	0.689	0	0	1.149	0	0	0	0	0	0.459	0	28.2568	0.23	0	19.068	0	3.2162	0.4595	0	0	0	0	0	0	0	0	0	0	0	0	0	0	0	0	0	0	0	0	0	0	0	0	27.797
5.7561	0.2297	0	0	0	0	0	1.838	0	0	0.689	0	0	0	0	0	0.23	0	26.8784	0.23	0	17.689	0	3.9054	0.6892	0	0	0	0	0	0	0	0	0	0	0	0	0	0	0	0	0	0	0	0	0	0	0	0	27.568
5.7655	0.6892	0	0	0	0	0	2.297	0	0	0.689	0	0	0	0	0	0	0.23	25.7297	0.23	0	18.608	0	3.2162	1.3784	0	0	0	0	0	0	0	0	0	0	0	0	0	0	0	0	0	0	0	0	0	0	0	0	29.176
5.7749	0.9189	0	0	0	0	0	1.378	0	0	0	0	0	0	0	0	0	0	24.3514	0	0	21.135	0	3.9054	1.3784	0	0	0	0	0	0	0	0	0	0	0	0	0	0	0	0	0	0	0	0	0	0	0	0	28.486
5.7843	0	0	0	0	0	0	0.919	0	0	0	0	0	0	0	0	0	0.459	24.3514	0	0	22.514	0	2.9865	1.1486	0	0	0	0	0	0	0	0	0	0	0	0	0	0	0	0	0	0	0	0	0	0	0	0	29.405
5.7936	0	0	0	0	0	0	1.378	0	0	0	0	0	0	0	0	0	0.23	24.1216	0.23	0	22.054	0	2.2973	0.9189	0	0	0	0	0	0	0	0	0	0	0	0	0	0	0	0	0	0	0	0	0	0	0	0	28.486
5.803	0	0	0	0	0	0	1.149	0	0	0	0	0	0	0	0.459	0	0.23	24.1216	0	0	18.608	0	2.527	0.2297	0	0	0	0	0	0	0	0	0	0	0	0	0	0	0	0	0	0	0	0	0	0	0	0	27.797
5.8124	0	0	0	0	0.459	0	1.149	0	0	0	0	0	0	0	0.689	0	0	24.3514	0	0	17.689	0	1.8378	0.2297	0	0	0	0	0	0	0	0	0	0	0	0	0	0	0	0	0	0	0	0	0	0	0	0	28.716
5.8218	0	0	0	0	1.149	0	1.378	0	0	0	0	0	0	0	0.919	0	0	24.8108	0	0	18.608	0	1.3784	0.6892	0	0	0	0	0	0	0	0	0	0	0	0	0	0	0	0	0	0	0	0	0	0	0	0	29.635
5.8311	0	0	0	0	1.608	0	0.919	0	0	0	0	0	0	0	0.919	0.23	0	23.8919	0	0	17.459	0	1.8378	0.6892	0	0	0	0	0	0	0	0	0	0	0	0	0	0	0	0	0	0	0	0	0	0	0	0	28.716
5.8405	0	0	0	0	1.838	0	0.919	0	0	0	0	0	0.2297	0	0.23	0	0	24.1216	0	0	19.068	0	2.9865	0.4595	0	0	0	0	0	0	0	0	0	0	0	0	0	0	0	0	0	0	0	0	0	0	0	0	27.568
5.8499	0	0	0	0	2.527	0	0.689	0	0	0	0	0	0.4595	0	0	0	0	22.5135	0	0	18.608	0	2.2973	0.9189	0	0	0	0	0	0	0	0	0	0	0	0	0	0	0	0	0	0	0	0	0	0	0	0	26.189
5.8593	0	0	0	0	2.757	0	0.919	0	0	0	0	0	0.4595	0	0	0	0	21.3649	0	0	18.378	0	1.1486	0.4595	0	0	0	0	0	0	0	0	0	0	0	0	0	0	0	0	0	0	0	0	0	0	0	0	26.419
5.8686	0	0	0	0	1.608	0	1.149	0	0	0	0	0	0.4595	0	0	0	0	22.0541	0	0	18.149	0	1.6081	0.6892	0	0	0	0	0	0	0	0	0	0	0	0	0	0	0	0	0	0	0	0	0	0	0	0	27.568
5.878	0	0	0	0	1.608	0	0.919	0	0	0	0	0	0	0	0	0	0	21.5946	0	0	17.459	0	1.6081	0.9189	0	0	0	0	0	0	0	0	0	0	0	0	0	0	0	0	0	0	0	0	0	0	0	0	26.878
5.8874	0	0	0	0	1.608	0	1.149	0	0	0	0	0	0	0	0	0	0	18.8378	0	0	19.757	0	2.527	1.3784	0	0	0	0	0	0	0	0	0	0	0	0	0	0	0	0	0	0	0	0	0	0	0	0	27.797
5.8968	0	0	0	0	0.459	0	0.919	0	0	0.23	0	0	0	0	0	0	0	17.6892	0	0	19.986	0	1.8378	2.2973	0	0	0	0	0	0	0	0	0	0	0	0	0	0	0	0	0	0	0	0	0	0	0	0	26.878
5.9061	0	0	0	0	0.459	0	0.919	0	0	0	0	0	0	0	0	0.23	0	18.6081	0.23	0	20.676	0	1.3784	2.2973	0	0	0	0	0	0	0	0	0	0	0	0	0	0	0	0	0	0	0	0	0	0	0	0	27.797
5.9155	0	0	0	0	1.608	0	0.23	0	0	0	0	0	0	0	0	0	0	17.9189	0.459	0	18.838	0	2.0676	2.0676	0	0	0	0	0	0	0	0	0	0	0	0	0	0	0	0	0	0	0	0	0	0	0	0	26.649
5.9249	0	0	0	0	2.297	0	0	0	0	0	0	0	0	0	0.23	0	0	16.7703	0.23	0	18.378	0	1.6081	2.2973	0	0	0	0	0	0	0	0	0	0	0	0	0	0	0	0	0	0	0	0	0	0	0	0	25.959
5.9343	0	0	0	0	2.757	0	0	0	0	0	0	0	0	0	1.149	0	0	15.6216	0	0	17	0	1.3784	1.8378	0	0	0	0	0	0	0	0	0	0	0	0	0	0	0	0	0	0	0	0	0	0	0	0	26.649
5.9436	0	0	0	0	2.757	0	0	0	0	0	0	0	0	0	2.068	0	0	13.5541	0	0	17.459	0	2.527	1.8378	0	0	0	0	0	0	0	0	0	0	0	0	0	0	0	0	0	0	0	0	0	0	0	0	25.73
5.953	0	0	0	0	3.446	0	0	0	0	0	0	0	0	0	1.838	0	0	11.9459	0	0	18.149	0	2.9865	1.6081	0	0	0	0	0	0	0	0	0	0	0	0	0	0	0	0	0	0	0	0	0	0	0	0	25.959
5.9624	0	0	0	0	3.905	0	0	0	0	0	0	0	0	0	1.608	0.459	0	12.1757	0	0	19.986	0	2.2973	1.8378	0	0	0	0	0	0	0	0	0	0	0	0	0	0	0	0	0	0	0	0	0	0	0	0	28.257
5.9718	0	0	0	0	3.905	0	0	0	0	0	0	0	0	0	1.378	0.919	0	14.2432	0	0	22.284	0	2.7568	2.2973	0	0	0	0	0	0	0	0	0	0	0	0	0	0	0	0	0	0	0	0	0	0	0	0	27.568
5.9811	0	0	0	0	4.365	0	0	0	0	0	0	0	0	0	0.459	0.23	0	12.8649	0	0	22.743	0	2.9865	2.0676	0	0	0	0	0	0	0	0	0	0	0	0	0	0	0	0	0	0	0	0	0	0	0	0	26.649
5.9905	0	0	0	0	2.527	0	0	0	0	0	0	0	0	0	0.459	0	0	10.5676	0	0	21.824	0	2.0676	1.3784	0	0	0	0	0	0	0	0	0	0	0	0	0	0	0	0	0	0	0	0	0	0	0	0	28.257
5.9999	0	0	0	0	2.757	0	0	0	0	0	0	0	0	0	0.689	0.23	0	11.7162	0	0	20.216	0	2.2973	0.6892	0	0	0	0	0	0	0	0	0	0	0	0	0	0	0	0	0	0	0	0	0	0	0	0	26.189
6.0093	0	0	0	0	4.365	0	0	0	0	0	0	0	0.2297	0	0.689	0.459	0	13.7838	0	0	18.608	0	2.0676	0.6892	0	0	0	0	0	0	0	0	0	0	0	0	0	0	0	0	0	0	0	0	0	0	0	0	26.419
6.0186	0	0	0	0	4.135	0	0	0	0	0	0	0	0.9189	0	0.23	0.23	0	13.5541	0	0	19.297	0	2.7568	0.6892	0	0	0	0	0	0	0	0	0	0	0	0	0	0	0	0	0	0	0	0	0	0	0	0	24.811
6.028	0	0	0	0	5.054	0	0	0	0	0	0	0	0.9189	0	0	0	0	14.0135	0	0	18.608	0	2.2973	0.2297	0	0	0	0	0	0	0	0	0	0	0	0	0	0	0	0	0	0	0	0	0	0	0	0	25.27
6.0374	0	0	0	0	3.676	0	0	0	0	0	0	0	1.3784	0	0	0	0	14.2432	0	0	19.068	0	1.1486	0.2297	0	0	0	0	0	0	0	0	0	0	0	0	0	0	0	0	0	0	0	0	0	0	0	0	25.73
6.0468	0	0	0	0	4.365	0	0	0	0	0	0	0	1.1486	0	0	0	0	13.3243	0	0	17.919	0	1.1486	0	0	0	0	0	0	0	0	0	0	0	0	0	0	0	0	0	0	0	0	0	0	0	0	0	25.041
6.0561	0	0	0	0	4.595	0	0	0	0	0	0	0	0.4595	0	0	0	0	12.4054	0	0	18.149	0	1.1486	0	0	0	0	0	0	0	0	0	0	0	0	0	0	0	0	0	0	0	0	0	0	0	0	0	25.5
6.0655	0	0	0	0	6.432	0	0	0	0	0	0	0	0.2297	0	0	0	0	12.4054	0	0	18.149	0	2.527	0	0	0	0	0	0	0	0	0	0	0	0	0	0	0	0	0	0	0	0	0	0	0	0	0	25.27
6.0749	0	0	0	0	6.662	0	0	0	0	0	0	0	0	0	0	0	0	10.5676	0	0	16.311	0	3.4459	0	0	0	0	0	0	0	0	0	0	0	0	0	0	0	0	0	0	0	0	0	0	0	0	0	25.041
6.0843	0	0	0	0	5.284	0	0	0	0	0	0	0	0	0	0	0.23	0	11.027	0	0	15.851	0	4.1351	0.2297	0	0	0	0	0	0	0	0	0	0	0	0	0	0	0	0	0	0	0	0	0	0	0	0	24.122
6.0936	0	0	0	0	5.054	0	0	0	0	0	0	0	0	0	0	0.23	0	12.6351	0	0	15.392	0	3.2162	0.6892	0	0	0	0	0	0	0	0	0	0	0	0	0	0	0	0	0	0	0	0	0	0	0	0	24.811
6.103	0	0	0	0	3.676	0	0	0	0.2297	0	0	0	0	0	0	0.23	0	12.8649	0	0	13.784	0	2.9865	1.1486	0	0	0	0	0	0	0	0	0	0	0	0	0	0	0	0	0	0	0	0	0	0	0	0	24.351
6.1124	0	0	0	0	3.216	0	0	0	0.2297	0	0	0	0	0	0	0.23	0	13.0946	0	0	11.946	0	3.2162	1.3784	0	0	0	0	0	0	0	0	0	0	0	0	0	0	0	0	0	0	0	0	0	0	0	0	23.892
6.1218	0	0	0	0	2.297	0	0	0	0.2297	0	0	0	0	0	0	0.689	0	15.1622	0	0	13.324	0	3.9054	1.8378	0	0	0	0	0	0	0	0	0	0	0	0	0	0	0	0	0	0	0	0	0	0	0	0	23.662
6.1311	0	0	0	0	2.297	0	0	0	0	0	0	0	0	0	0	0.919	0	13.3243	0	0	11.946	0	2.527	1.6081	0	0	0	0	0	0	0	0	0	0	0	0	0	0	0	0	0	0	0	0	0	0	0	0	22.514
6.1405	0	0	0	0	1.608	0	0	0	0	0	0	0	0	0	0	1.149	0	11.2568	0	0	12.865	0	2.527	1.8378	0	0	0	0	0	0	0	0	0	0	0	0	0	0	0	0	0	0	0	0	0	0	0	0	23.662
6.1499	0	0	0	0	3.446	0	0	0	0	0	0	0	0	0	0	1.149	0	9.4189	0	0	13.324	0	2.9865	2.2973	0	0	0	0	0	0	0	0	0	0	0	0	0	0	0	0	0	0	0	0	0	0	0	0	22.514
6.1593	0	0	0	0	5.743	0	0	0	0	0	0	0	0	0	0	0.23	0	9.1892	0	0	11.486	0	2.9865	2.9865	0	0	0	0	0	0	0	0	0	0	0	0	0	0	0	0	0	0	0	0	0	0	0	0	23.432
6.1686	0	0	0	0	7.811	0	0	0	0	0	0	0	0.4595	0	0	0.23	0	9.1892	0	0	9.878	0	1.8378	2.0676	0	0	0	0	0	0	0	0	0	0	0	0	0	0	0	0	0	0	0	0	0	0	0	0	23.662
6.178	0	0	0	0	8.27	0	0	0	0	0	0	0	0.2297	0	0	0.23	0	9.1892	0	0	10.338	0	2.0676	1.8378	0	0	0	0	0	0	0	0	0	0	0	0	0	0	0	0	0	0	0	0	0	0	0	0	22.514
6.1874	0	0	0	0	8.041	0	0	0	0	0	0	0	0	0	0	0	0	7.5811	0	0	7.351	0	2.0676	1.3784	0	0	0	0	0	0	0	0	0	0	0	0	0	0	0	0	0	0	0	0	0	0	0	0	22.973
6.1968	0	0	0	0	7.581	0	0	0	0	0	0	0	0.2297	0	0	0.23	0	7.5811	0	0	7.811	0	3.4459	0.9189	0	0	0	0	0	0	0	0	0	0	0	0	0	0	0	0	0	0	0	0	0	0	0	0	22.743
6.2061	0	0	0	0	7.122	0	0	0	0	0	0	0	0	0	0	0.689	0	6.4324	0	0	5.973	0	4.1351	0.6892	0	0	0	0	0	0	0	0	0	0	0	0	0	0	0	0	0	0	0	0	0	0	0	0	22.743
6.2155	0	0	0	0	7.122	0	0	0	0	0	0	0	0	0	0	0.23	0	7.1216	0.23	0	5.743	0	4.5946	0.9189	0	0	0	0	0	0	0	0	0	0	0	0	0	0	0	0	0	0	0	0	0	0	0	0	22.743
6.2249	0	0	0	0	6.432	0	0	0	0	0	0	0	0.4595	0	0	0	0	6.6622	0.459	0	4.595	0	3.6757	0.9189	0	1.149	0	0	0	0	0	0	0	0	0	0	0	0	0.23	0	0	0	0	0	0	0	0	0	20.446
6.2343	0	0	0	0	5.973	0	0	0	0	0	0	0	0.4595	0	0	0	0	8.0405	0.689	0	4.824	0	2.2973	1.1486	0	1.149	0	0	0	0	0	0	0	0	0	0	0	0	0	0	0	0	0	0	0	0	0	0	19.527
6.2436	0	0	0	0	6.662	0	0	0	0	0	0	0	0.2297	0	0	0	0	6.2027	0.23	0	4.595	0	2.527	0.4595	0	1.149	0	0	0	0	0	0	0	0	0	0	0	0	0.459	0	0	0	0	0	0	0	0	0	19.297
6.253	0	0	0	0	5.284	0	0	0	0	0	0	0	0	0	0	0	0	8.0405	0	0	5.743	0	4.3649	0.2297	0	1.608	0	0	0	0	0	0	0	0	0	0	0	0	0.459	0	0	0	0	0	0	0	0	0	17.689
6.2624	0	0	0	0	5.743	0	0	0	0	0	0	0	0	0	0	0	0	8.0405	0	0	6.892	0	5.0541	0	0	1.378	0	0	0	0	0	0	0	0	0	0	0	0	0	0	0	0	0	0	0	0	0	0	18.378
6.2718	0	0	0	0	7.351	0	0	0	0	0	0	0	0	0	0	0	0	8.7297	0	0	6.662	0	4.5946	0.2297	0	0.919	0	0	0	0	0	0	0	0	0	0	0	0	0	0	0	0	0	0	0	0	0	0	17
6.2811	0	0.459	0	0	6.662	0	0.23	0	0	0	0	0	0	0	0	0	0	7.8108	0	0	5.743	0	2.9865	0.2297	0	1.378	0	0	0	0	0	0	0	0	0	0	0	0	0	0	0	0	0	0	0	0	0	0	17.23
6.2905	0	0.459	0	0	6.203	0	0.459	0	0	0	0	0	0	0	0	0	0	8.2703	0	0	5.514	0	2.2973	1.1486	0	0.689	0	0	0	0	0	0	0	0	0	0	0	0	0	0	0	0	0	0	0	0	0	0	17
6.2999	0	0	0	0	6.203	0	0.459	0	0	0	0	0	0	0	0	0	0	5.973	0	0	5.743	0	3.2162	1.3784	0	1.149	0	0	0	0	0	0	0	0	0	0	0	0	0	0	0	0	0	0	0	0	0	0	18.838
6.3093	0	0	0	0	6.203	0	0.459	0	0	0	0	0	0	0	0	0	0	3.6757	0	0	6.892	0	3.2162	1.3784	0	0.919	0	0	0	0	0	0	0	0	0	0	0	0	0	0	0	0	0	0	0	0	0	0	19.986
6.3186	0	0	0	0	5.514	0	0.689	0	0	0	0	0	0	0	0	0	0	3.2162	0	0	6.203	0	3.2162	1.3784	0	0.689	0	0	0	0	0	0	0	0	0	0	0	0	0	0	0	0	0	0	0	0	0	0	20.446
6.328	0	0	0	0	4.135	0	0.459	0	0	0	0	0	0	0	0	0.23	0	2.2973	0	0	5.973	0	2.9865	0.2297	0	0.23	0	0	0	0	0	0	0	0	0	0	0	0	0	0	0	0	0	0	0	0	0	0	21.595
6.3374	0	0	0	0	2.757	0	0	0	0	0	0	0	0	0	0	0	0	2.0676	0	0	6.892	0	4.5946	0	0	0.23	0	0	0	0	0	0	0	0	0	0	0	0	0	0	0	0	0	0	0	0	0	0	20.676
6.3468	0	0	0	0	3.676	0	0	0	0	0	0	0	0	0	0	0.459	0	2.7568	0	0	7.351	0	5.0541	0	0	0	0	0	0	0	0	0	0	0	0	0	0	0	0	0	0	0	0	0	0	0	0	0	19.527
6.3561	0	0	0	0	3.905	0	0	0	0	0	0	0	0	0	0	0.459	0	2.527	0	0	6.892	0	4.5946	0	0	0	0	0	0	0	0	0	0	0	0	0	0	0	0	0	0	0	0	0	0	0	0	0	19.757
6.3655	0	0	0	0	3.676	0	0	0	0	0	0	0	0	0	0	0	0	2.7568	0	0	7.122	0	2.7568	0	0	0	0	0	0	0	0	0	0	0	0	0	0	0	0	0	0	0	0	0	0	0	0	0	19.527
6.3749	0	0	0	0	2.986	0	0	0	0	0	0	0	0	0	0	0	0	1.6081	0	0	7.581	0	3.2162	0	0	0	0	0	0	0	0	0	0	0	0	0	0	0	0	0	0	0	0	0	0	0	0	0	20.446
6.3843	0	0	0	0	2.757	0	0	0	0	0	0	0	0	0	0	0	0	0.9189	0	0	5.284	0	3.9054	0	0	0	0	0	0	0	0	0	0	0	0	0	0	0	0	0	0	0	0	0	0	0	0	0	19.527
6.3936	0	0	0	0	2.757	0	0	0	0	0	0	0	0	0	0	0.23	0	0.4595	0	0	5.284	0	4.3649	0	0	0	0	0	0	0	0	0	0	0	0	0	0	0	0	0	0	0	0	0	0	0	0	0	19.757
6.403	0	0	0	0	3.676	0	0	0	0	0	0	0	0	0	0.459	0.23	0	2.2973	0	0	6.432	0	3.2162	0	0	0	0	0	0	0	0	0	0	0	0	0	0	0	0	0	0	0	0	0	0	0	0	0	20.446
6.4124	0	0	0	0	2.527	0	0	0	0	0	0	0	0	0	0.459	0.23	0	3.9054	0.23	0	7.122	0	2.527	0	0	0	0	0	0	0	0	0	0	0	0	0	0	0	0	0	0	0	0	0	0	0	0	0	21.135
6.4217	0	0	0	0	2.297	0	0	0	0	0	0	0	0.6892	0	0	0	0	3.9054	0	0	7.122	0	3.2162	0	0	0	0	0	0	0	0	0	0	0	0	0	0	0	0	0	0	0	0	0	0	0	0	0	19.297
6.4311	0	0	0	0	3.216	0	0.459	0	0	0	0	0	0.6892	0	0	0	0	3.9054	0.459	0	5.973	0	4.1351	0	0	0	0	0	0	0	0	0	0	0	0	0	0	0	0	0	0	0	0	0	0	0	0	0	18.378
6.4405	0	0	0	0	3.676	0	0.459	0	0	0	0	0	0.9189	0	0	0	0	2.7568	0	0	5.514	0	2.2973	0	0	0	0	0	0	0	0	0	0	0	0	0	0	0	0	0	0	0	0	0	0	0	0	0	19.068
6.4499	0	0	0	0	4.135	0	0.23	0	0	0	0	0	1.1486	0	0	0	0	1.8378	0	0	4.595	0	2.0676	0	0	0	0	0	0	0	0	0	0	0	0	0	0	0	0	0	0	0	0	0	0	0	0	0	18.149
6.4592	0	0	0	0	3.446	0	0.23	0	0	0	0	0	0.4595	0	0.23	0.23	0	0.2297	0	0	5.054	0	2.2973	0	0	0	0	0	0	0	0	0	0	0	0	0	0	0	0	0	0	0	0	0	0	0	0	0	17.459
6.4686	0.2297	0	0	0	2.527	0	0	0	0	0	0	0	0.4595	0	0	0.459	0	0.6892	0	0	4.135	0	2.9865	0	0	0	0	0	0	0	0	0	0	0	0	0	0	0	0	0	0	0	0	0	0	0	0	0	17.689
6.478	0	0	0	0	1.608	0	0	0	0	0	0	0	0	0	0	0.23	0	0.6892	0	0	3.676	0	2.527	0	0	0	0	0	0	0	0	0	0	0	0	0	0	0	0	0	0	0	0	0	0	0	0	0	17.23
6.4874	0	0	0	0	0.919	0	0	0	0	0	0	0	0	0	0	0	0	0.9189	0	0	3.446	0	2.527	0	0	0	0	0	0	0	0	0	0	0	0	0	0	0	0	0	0	0	0	0	0	0	0	0	17.689
6.4967	0	0	0	0	1.378	0	0	0	0	0	0	0	0	0	0	0	0	0.6892	0	0	3.446	0	1.6081	0.2297	0	0	0	0	0	0	0	0	0	0	0	0	0	0	0	0	0	0	0	0	0	0	0	0	17.689
6.5061	0	0	0	0	2.068	0	0.23	0	0	0	0	0	0	0	0	0.23	0	0.2297	0	0	3.446	0	0.4595	0.2297	0	0	0	0	0	0	0	0	0	0	0	0	0	0	0	0	0	0	0	0	0	0	0	0	18.378
6.5155	0	0	0	0	2.527	0	0	0	0	0	0	0	0	0	0	0.23	0	0	0	0	3.676	0	0.6892	0	0	0	0	0	0	0	0	0	0	0	0	0	0	0	0	0	0	0	0	0	0	0	0	0	19.527
6.5249	0	0	0	0	1.838	0	0	0	0	0	0	0	0	0	0	0	0	0	0	0	4.135	0	1.8378	0	0	0	0	0	0	0	0	0	0	0	0	0	0	0	0	0	0	0	0	0	0	0	0	0	19.068
6.5342	0	0	0	0	2.527	0	0	0	0	0	0	0	0	0	0	0	0	0	0	0	4.595	0	2.0676	0	0	0	0	0	0	0	0	0	0	0	0	0	0	0	0	0	0	0	0	0	0	0	0	0	17.689
6.5436	0	0	0	0	3.216	0	0	0	0	0	0	0	0	0	0	0	0	0	0.459	0	4.595	0	2.527	0.4595	0	0	0	0	0	0	0	0	0	0	0	0	0	0	0	0	0	0	0	0	0	0	0	0	17.459
6.553	0	0	0	0	3.446	0	0	0	0	0	0	0	0	0	0	0	0	0	0.689	0	4.824	0	1.1486	0.4595	0	0	0	0	0	0	0	0	0	0	0	0	0	0	0	0	0	0	0	0	0	0	0	0	16.77
6.5624	0	0	0	0	3.446	0	0	0	0	0	0	0	0	0	0	0	0	0	0.919	0	3.676	0	1.8378	0	0	0	0	0	0	0	0	0	0	0	0	0	0	0	0	0	0	0	0	0	0	0	0	0	17
6.5717	0	0	0	0	2.297	0	0	0	0	0	0	0	0	0	0	0	0	0	0.459	0	2.527	0	1.8378	0	0	0	0	0	0	0	0	0	0	0	0	0	0	0	0	0	0	0	0	0	0	0	0	0	16.541
6.5811	0	0	0	0	1.149	0	0	0	0	0	0	0	0	0	0	0	0	0	0	0	2.986	0	2.9865	0	0	0	0	0	0	0	0	0	0	0	0	0	0	0	0	0	0	0	0	0	0	0	0	0	15.392
6.5905	0	0	0	0	0.459	0	0	0	0	0	0	0	0.2297	0	0	0	0	0	0	0	3.216	0	2.2973	0	0	0	0	0	0	0	0	0	0	0	0	0	0	0	0	0	0	0	0	0	0	0	0	0	14.703
6.5999	0	0	0	0	0.919	0	0	0	0	0	0	0	0.4595	0	0	0.23	0	0	0	0	3.446	0	2.0676	0	0	0	0	0	0	0	0	0	0	0	0	0	0	0	0	0	0	0	0	0	0	0	0	0	14.473
6.6092	0	0	0	0	1.149	0	0	0	0	0	0	0	0	0	0	0	0	0	0	0	4.595	0	2.9865	0	0	0	0	0	0	0	0	0	0	0	0	0	0	0	0	0	0	0	0	0	0	0	0	0	12.865
6.6186	0	0	0	0	0.919	0	0	0	0	0	0	0	0	0	0	0	0	0	0	0	5.514	0	3.4459	0	0	0	0	0	0	0	0	0	0	0	0	0	0	0	0	0	0	0	0	0	0	0	0	0	12.405
6.628	0	0	0	0	0.689	0	0	0	0	0	0	0	0	0	0	0.23	0	0	0	0	6.892	0	3.4459	0	0	0	0	0	0	0	0	0	0	0	0	0	0	0	0	0	0	0	0	0	0	0	0	0	12.176
6.6374	0	0	0	0	0.919	0	0	0	0	0	0	0	0.4595	0	0	0.459	0	0	0	0	8.5	0	3.6757	0	0	0	0	0	0	0	0	0	0	0	0	0	0	0	0	0	0	0	0	0	0	0	0	0	12.176
6.6467	0	0	0	0	1.378	0	0	0	0	0	0	0	0	0	0	0.459	0	0	0	0	10.797	0	3.9054	0	0	0	0	0	0	0	0	0	0	0	0	0	0	0	0	0	0	0	0	0	0	0	0	0	11.716
6.6561	0.2297	0	0	0	1.608	0	0	0	0	0	0	0	0	0	0	0.23	0	0	0	0	10.338	0	4.3649	0	0	0	0	0	0	0	0	0	0	0	0	0	0	0	0	0	0	0	0	0	0	0	0	0	11.946
6.6655	0	0	0	0	2.527	0	0	0	0	0	0	0	0.6892	0	0	0	0	0	0	0	10.338	0	3.6757	0	0	0	0	0	0	0	0	0	0	0	0	0	0	0	0	0	0	0	0	0	0	0	0	0	11.027
6.6749	0.2297	0	0	0	2.527	0	0	0	0	0	0	0	0.4595	0	0	0	0	0	0	0	8.959	0	2.7568	0	0	0	0	0	0	0	0	0	0	0	0	0	0	0	0	0	0	0	0	0	0	0	0	0	11.946
6.6842	0	0	0	0	2.757	0	0	0	0	0	0	0	0	0	0	0	0	0	0	0	10.108	0	1.6081	0	0	0	0	0	0	0	0	0	0	0	0	0	0	0	0	0	0	0	0	0	0	0	0	0	11.716
6.6936	0	0	0	0	1.838	0	0	0	0	0	0	0	0	0	0	0	0	0	0	0	10.108	0	0.4595	0	0	0	0	0	0	0	0	0	0	0	0	0	0	0	0	0	0	0	0	0	0	0	0	0	11.946
6.703	0	0	0	0	1.149	0	0	0	0	0	0	0	0	0	0	0	0	0	0	0	9.419	0	0	0.2297	0	0	0	0	0	0	0	0	0	0	0	0	0	0	0	0	0	0	0	0	0	0	0	0	12.405
6.7124	0	0	0	0	0.23	0	0	0	0	0	0	0	0	0	0	0	0	0	0	0	9.419	0	0.2297	0.4595	0	0	0	0	0	0	0	0	0	0	0	0	0	0	0	0	0	0	0	0	0	0	0	0	11.716
6.7217	0	0	0	0	0	0	0	0	0	0	0	0	0	0	0	0	0	0	0	0	8.27	0	0.2297	0.4595	0	0	0	0	0	0	0	0	0	0	0	0	0	0	0	0	0	0	0	0	0	0	0	0	11.486
6.7311	0	0	0	0	0	0	0	0	0	0	0	0	0	0	0	0	0	0	0	0	9.878	0	0	0.6892	0	0	0	0	0	0	0	0	0	0	0	0	0	0	0	0	0	0	0	0	0	0	0	0	11.027
6.7405	0	0	0	0	0	0	0	0	0	0	0	0	0	0	0	0	0	0	0	0	10.108	0	0.2297	0.2297	0	0	0	0	0	0	0	0	0	0	0	0	0	0	0	0	0	0	0	0	0	0	0	0	11.257
6.7499	0	0	0	0	0.23	0	0	0	0	0	0	0	0	0	0	0.23	0	0	0	0	10.568	0	0.2297	0.2297	0	0	0	0	0	0	0	0	0	0	0	0	0	0	0	0	0	0	0	0	0	0	0	0	10.108
6.7592	0	0	0	0	0.459	0	0	0	0	0	0	0	0	0	0	0	0	0	0	0	12.176	0	0.4595	0	0	0	0	0	0	0	0	0	0	0	0	0	0	0	0	0	0	0	0	0	0	0	0	0	11.027
6.7686	0	0	0	0	0.23	0	0	0	0	0	0	0	0	0	0	0	0	0	0	0	14.932	0	0.6892	0	0	0	0	0	0	0	0	0	0	0	0	0	0	0	0	0	0	0	0	0	0	0	0	0	10.108
6.778	0	0	0	0	0	0	0	0	0	0	0	0	0	0	0	0	0	0	0	0	14.243	0	1.6081	0	0	0	0	0	0	0	0	0	0	0	0	0	0	0	0	0	0	0	0	0	0	0	0	0	10.338
6.7874	0	0	0	0	0	0	0	0	0	0	0	0	0	0	0	0	0	0	0	0	12.865	0	2.0676	0	0	0	0	0	0	0	0	0	0	0	0	0	0	0	0	0	0	0	0	0	0	0	0	0	9.419
6.7967	0	0	0	0	0	0	0	0	0	0	0	0	0	0	0	0	0	0	0	0	12.865	0	2.527	0	0	0	0	0	0	0	0	0	0	0	0	0	0	0	0	0	0	0	0	0	0	0	0	0	8.959
6.8061	0	0	0	0	0	0	0	0	0	0	0	0	0	0.23	0	0.23	0	0	0	0	12.635	0	2.527	0	0	0	0	0	0	0	0	0	0	0	0	0	0	0	0	0	0	0	0	0	0	0	0	0	8.041
6.8155	0	0	0	0	0	0	0	0	0	0	0	0	0	0.459	0	0.689	0	0	0	0	12.405	0	1.3784	0	0	0	0	0	0	0	0	0	0	0	0	0	0	0	0	0	0	0	0	0	0	0	0	0	7.811
6.8249	0	0	0	0	0.23	0	0	0	0	0	0	0	0	0.23	0	0.919	0	0	0	0	11.716	0	1.8378	0	0	0	0	0	0	0	0	0	0	0	0	0	0	0	0	0	0	0	0	0	0	0	0	0	7.122
6.8342	0	0	0	0	0.919	0	0	0	0	0	0	0	0	0.23	0	1.149	0	0	0	0	10.797	0	2.0676	0	0	0	0	0	0	0	0	0	0	0	0	0	0	0	0	0	0	0	0	0	0	0	0	0	7.581
6.8436	0	0	0	0	1.149	0	0	0	0	0	0	0	0	0	0	0.459	0	0	0	0	8.959	0	2.9865	0	0	0	0	0	0	0	0	0	0	0	0	0	0	0	0	0	0	0	0	0	0	0	0	0	7.811
6.853	0	0	0	0	1.608	0	0	0	0	0	0	0	0	0	0	0.689	0	0	0	0	7.351	0	4.1351	0	0	0	0	0	0	0	0	0	0	0	0	0	0	0	0	0	0	0	0	0	0	0	0	0	7.581
6.8624	0	0	0	0	2.068	0	0	0	0	0	0	0	0	0.23	0	0.23	0	0	0	0	8.041	0	4.8243	0	0	0	0	0	0	0	0	0	0	0	0	0	0	0	0	0	0	0	0	0	0	0	0	0	8.27
6.8717	0	0	0	0	3.216	0	0	0	0	0	0	0	0	0	0	0.459	0	0	0	0	9.419	0	4.8243	0	0	0	0	0	0	0	0	0	0	0	0	0	0	0	0	0	0	0	0	0	0	0	0	0	7.351
6.8811	0	0	0	0	2.527	0	0	0	0	0	0	0	0	0	0	0.459	0	0	0.23	0	10.338	0	5.7432	0	0	0	0	0	0	0	0	0	0	0	0	0	0	0	0	0	0	0	0	0	0	0	0	0	7.811
6.8905	0	0	0	0	1.838	0	0	0	0	0	0	0	0	0	0	0.459	0	0	0.23	0	8.27	0	5.0541	0	0	0	0	0	0	0	0	0	0	0	0	0	0	0	0	0	0	0	0	0	0	0	0	0	8.041
6.8999	0	0	0	0	0.689	0	0	0	0	0	0	0	0	0	0	0.23	0	0	0.459	0	6.203	0	4.3649	0	0	0	0	0	0	0	0	0	0	0	0	0	0	0	0	0	0	0	0	0	0	0	0	0	6.662
6.9092	0	0	0	0	0.459	0	0	0	0	0	0	0	0	0	0	0	0	0	0.459	0	6.432	0	2.9865	0	0	0	0	0	0	0	0	0	0	0	0	0	0	0	0	0	0	0	0	0	0	0	0	0	6.892
6.9186	0	0	0	0	0.459	0	0	0	0	0	0	0	0	0	0	0	0	0	0	0	5.514	0	1.6081	0	0	0	0	0	0	0	0	0	0	0	0	0	0	0	0	0	0	0	0	0	0	0	0	0	6.662
6.928	0	0	0	0	1.378	0	0	0	0	0	0	0	0	0	0	0	0	0	0	0	5.054	0	2.7568	0	0	0	0	0	0	0	0	0	0	0	0	0	0	0	0	0	0	0	0	0	0	0	0	0	7.351
6.9374	0	0	0	0	1.838	0	0	0	0	0	0	0	0	0	0	0	0	0	0	0	5.284	0	2.527	0	0	0	0	0	0	0	0	0	0	0	0	0	0	0	0	0	0	0	0	0	0	0	0	0	6.892
6.9467	0	0	0	0	2.068	0	0	0	0	0	0	0	0	0	0	0.459	0	0	0	0	5.284	0	1.8378	0	0	0	0	0	0	0	0	0	0	0	0	0	0	0	0	0	0	0	0	0	0	0	0	0	6.662
6.9561	0	0	0	0	1.838	0	0	0	0	0	0	0	0	0	0	0.689	0	0	0	0	4.365	0	1.8378	0	0	0	0	0	0	0	0	0	0	0	0	0	0	0	0	0	0	0	0	0	0	0	0	0	6.662
6.9655	0	0	0	0	1.378	0	0	0	0	0	0	0	0.2297	0	0	0.23	0	0	0	0	4.135	0	2.527	0	0	0	0	0	0	0	0	0	0	0	0	0	0	0	0	0	0	0	0	0	0	0	0	0	6.432
6.9749	0	0	0	0	1.149	0	0	0	0	0	0	0	0.2297	0	0	0	0	0	0	0	3.905	0	2.0676	0	0	0	0	0	0	0	0	0	0	0	0	0	0	0	0	0	0	0	0	0	0	0	0	0	6.662
6.9842	0	0	0	0	1.378	0	0	0	0	0.459	0	0	0	0	0	0.459	0	0	0	0	3.676	0	2.2973	0	0	0	0	0	0	0	0	0	0	0	0	0	0	0	0	0	0	0	0	0	0	0	0	0	5.514
6.9936	0	0	0	0	1.608	0	0	0	0	0.23	0	0	0	0	0	0.23	0	0	0	0	3.905	0	1.3784	0	0	0	0	0	0	0	0	0	0	0	0	0	0	0	0	0	0	0	0	0	0	0	0	0	5.284
7.003	0	0	0	0	1.838	0	0	0	0	0	0	0	0	0	0	0.459	0	0	0	0	3.905	0	1.6081	0.2297	0	0	0	0	0	0	0	0	0	0	0	0	0	0	0	0	0	0	0	0	0	0	0	0	4.595
7.0124	0	0	0	0	1.149	0	0.23	0	0	0	0	0	0	0	0	0.459	0	0	0	0	4.135	0	1.3784	0.4595	0	0	0	0	0	0	0	0	0	0	0	0	0	0	0	0	0	0	0	0	0	0	0	0	5.054
7.0217	0	0	0	0	2.068	0	0	0	0	0	0	0	0	0	0	0.23	0	0	0	0	5.054	0	1.1486	0.4595	0	0	0	0	0	0	0	0	0	0	0	0	0	0	0	0	0	0	0	0	0	0	0	0	4.595
7.0311	0	0	0	0	1.608	0	0	0	0	0	0	0	0	0	0	0	0	0	0	0	4.595	0	0.6892	0.2297	0	0	0	0	0	0	0	0	0	0	0	0	0	0	0	0	0	0	0	0	0	0	0	0	4.365
7.0405	0	0	0	0	2.068	0	0	0	0	0	0	0	0	0	0	0	0	0	0	0	2.986	0	1.8378	0	0	0	0	0	0	0	0	0	0	0	0	0	0	0	0	0	0	0	0	0	0	0	0	0	3.905
7.0499	0	0	0	0	2.297	0	0	0	0	0	0	0	0	0	0	0	0	0	0	0	2.757	0	2.0676	0	0	0	0	0	0	0	0	0	0	0	0	0	0	0	0	0	0	0	0	0	0	0	0	0	3.676
7.0592	0	0	0	0	2.757	0	0	0	0	0	0	0	0	0	0	0	0	0	0	0	2.757	0	1.1486	0.2297	0	0	0	0	0	0	0	0	0	0	0	0	0	0	0	0	0	0	0	0	0	0	0	0	3.446
7.0686	0	0	0	0	2.527	0	0.23	0	0	0	0	0	0	0	0	0	0	0	0	0	1.608	0	1.6081	0.2297	0	0	0	0	0	0	0	0	0	0	0	0	0	0	0	0	0	0	0	0	0	0	0	0	2.986
7.078	0	0	0	0	1.378	0	0	0	0	0	0	0	0.2297	0	0	0.23	0	0	0	0	2.527	0	2.527	0	0	0	0	0	0	0	0	0	0	0	0	0	0	0	0	0	0	0	0	0	0	0	0	0	2.527
7.0874	0	0	0	0	1.149	0	0.23	0	0	0	0	0	0	0.23	0	0.459	0	0	0	0	1.838	0	2.7568	0.2297	0	0	0	0	0	0	0	0	0	0	0	0	0	0	0	0	0	0	0	0	0	0	0	0	2.986
7.0967	0	0	0	0	0.919	0	0.459	0	0	0	0	0	0	0.459	0	0.689	0	0	0	0	1.838	0	2.9865	0	0	0	0	0	0	0	0	0	0	0	0	0	0	0	0	0	0	0	0	0	0	0	0	0	2.757
7.1061	0	0	0	0	0.689	0	0	0	0	0	0	0	0	0.23	0	0.689	0	0	0	0	1.608	0	3.6757	0.2297	0	0	0	0	0	0	0	0	0	0	0	0	0	0	0	0	0	0	0	0	0	0	0	0	2.527
7.1155	0	0	0	0	0	0	0	0	0	0	0	0	0	0	0	0.459	0	0	0.23	0	1.608	0	4.8243	0.4595	0	0	0	0	0	0	0	0	0	0	0	0	0	0	0	0	0	0	0	0	0	0	0	0	2.068
7.1249	0	0	0	0	0.459	0	0	0	0	0	0	0	0	0	0	0	0	0	0.23	0	2.068	0	5.5135	0.4595	0	0	0	0	0	0	0	0	0	0	0	0	0	0	0	0	0	0	0	0	0	0	0	0	1.838
7.1342	0	0	0	0	0.919	0	0	0	0	0	0	0	0	0	0	0.459	0	0	0	0	2.068	0	6.2027	0.2297	0	0	0	0	0	0	0	0	0	0	0	0	0	0	0	0	0	0	0	0	0	0	0	0	1.378
7.1436	0	0	0	0	1.608	0	0	0	0	0	0	0	0	0	0.23	0.23	0	0	0	0	2.297	0	6.2027	0	0	0	0	0	0	0	0	0	0	0	0	0	0	0	0	0	0	0	0	0	0	0	0	0	1.149
7.153	0	0	0	0	1.608	0	0	0	0	0	0	0	0	0	0	0	0	0	0	0	2.757	0	6.4324	0	0	0	0	0	0	0	0	0	0	0	0	0	0	0	0	0	0	0	0	0	0	0	0	0	0.459
7.1624	0	0	0	0	1.378	0	0	0	0	0	0	0	0	0	0	0	0	0	0	0	2.757	0	8.2703	0	0	0	0	0	0	0	0	0	0	0	0	0	0	0	0	0	0	0	0	0	0	0	0	0	0.689
7.1717	0	0	0	0	0.919	0	0	0	0	0	0	0	0	0	0	0.23	0	0	0.23	0	2.297	0	8.0405	0.2297	0	0	0	0	0	0	0	0	0	0	0	0	0	0	0	0	0	0	0	0	0	0	0	0	0.459
7.1811	0	0	0	0	0.689	0	0	0	0	0	0	0	0	0	0	0.459	0	0	0	0	2.986	0	7.1216	0	0	0	0	0	0	0	0	0	0	0	0	0	0	0	0	0	0	0	0	0	0	0	0	0	0.689
7.1905	0	0	0	0	0.689	0	0	0	0	0	0	0	0	0	0	0.23	0	0	0	0	2.527	0	5.5135	0	0	0	0	0	0	0	0	0	0	0	0	0	0	0	0	0	0	0	0	0	0	0	0	0	0.919
7.1999	0	0	0	0	0.23	0	0	0	0	0	0	0	0	0	0	0	0	0	0	0	2.527	0	6.2027	0	0	0	0	0	0	0	0	0	0	0	0	0	0	0	0	0	0	0	0	0	0	0	0	0	0.919
7.2092	0	0	0	0	0	0	0	0	0	0	0	0	0	0	0	0	0	0	0	0	3.676	0	7.1216	0	0	0	0	0	0	0	0	0	0	0	0	0	0	0	0	0	0	0	0	0	0	0	0	0	0.919
7.2186	0	0	0	0	0	0	0	0	0	0	0	0	0	0	0	0.23	0	0	0	0	3.446	0	8.2703	0	0	0	0	0	0	0	0	0	0	0	0	0	0	0	0	0	0	0	0	0	0	0	0	0	1.378
7.228	0	0	0	0	0	0	0	0	0	0	0	0	0	0	0	0	0	0	0	0	2.297	0	8.9595	0	0	0	0	0	0	0	0	0	0	0	0	0	0	0	0	0	0	0	0	0	0	0	0	0	2.068
7.2374	0	0	0	0	0	0	0	0	0	0	0	0	0	0	0	0	0	0	0	0	3.446	0	9.1892	0	0	0	0	0	0	0	0	0	0	0	0	0	0	0	0	0	0	0	0	0	0	0	0	0	2.297
7.2467	0	0	0	0	0	0	0	0	0	0	0	0	0	0	0	0	0	0	0	0	4.595	0	8.9595	0	0	0	0	0	0	0	0	0	0	0	0	0	0	0	0	0	0	0	0	0	0	0	0	0	2.527
7.2561	0	0	0	0	0	0	0	0	0	0	0	0	0	0	0	0	0	0	0	0.4595	4.595	0	8.0405	0	0	0.23	0	0	0	0	0	0	0	0	0	0	0	0	0	0	0	0	0	0	0	0	0	0	2.527
7.2655	0	0	0	0	0.23	0	0	0	0	0	0	0	0	0	0	0	0	0	0	0.4595	4.824	0	7.5811	0	0	0	0	0	0	0	0	0	0	0	0	0	0	0	0	0	0	0	0	0	0	0	0	0	2.068
7.2749	0	0	0	0	0.23	0	0	0	0	0	0	0	0	0	0	0	0	0	0	0.4595	4.135	0	5.973	0	0	0	0	0	0	0	0	0	0	0	0	0	0	0	0	0	0	0	0	0	0	0	0	0	1.608
7.2842	0	0	0	0	0.459	0	0	0	0	0	0	0	0.6892	0	0	0	0	0	0	0	3.446	0	5.973	0	0	0	0	0	0	0	0	0	0	0	0	0	0	0	0	0	0	0	0	0	0	0	0	0	1.608
7.2936	0	0	0	0	0.23	0	0	0	0	0	0	0	0.9189	0	0	0	0	0	0	0	2.527	0	5.5135	0	0	0	0	0	0	0	0	0	0	0	0	0	0	0	0	0	0	0	0	0	0	0	0	0	1.149
7.303	0	0	0	0	0.23	0	0	0	0	0	0	0	0.9189	0	0	0	0	0	0	0	1.608	0	5.973	0	0	0.23	0	0	0	0	0	0	0	0	0	0	0	0	0	0	0	0	0	0	0	0	0	0	1.838
7.3124	0	0	0	0	0	0	0	0	0	0	0	0	0.9189	0	0	0	0	0	0	0	1.149	0	6.2027	0	0	0.459	0	0	0	0	0	0	0	0	0	0	0	0	0	0	0	0	0	0	0	0	0	0	1.838
7.3217	0	0	0	0	0	0	0	0	0	0	0	0	0.9189	0	0	0	0	0	0	0	2.068	0	5.7432	0	0	0.23	0	0	0	0	0	0	0	0	0	0	0	0	0	0	0	0	0	0	0	0	0	0	1.378
7.3311	0	0	0	0	0	0	0	0	0	0	0	0	0.9189	0	0	0	0	0	0	0	2.527	0	6.4324	0	0	0.23	0	0	0	0	0	0	0	0	0	0	0	0	0	0	0	0	0	0	0	0	0	0	1.378
7.3405	0	0	0	0	0	0	0	0	0	0	0	0	0.6892	0	0	0	0	0	0	0	3.446	0	5.7432	0	0	0	0	0	0	0	0	0	0	0	0	0	0	0	0	0	0	0	0	0	0	0	0	0	1.378
7.3499	0	0	0	0	0	0	0	0	0	0	0	0	0.6892	0	0	0	0	0	0	0	3.676	0	4.3649	0	0	0	0	0	0	0	0	0	0	0	0	0	0	0	0	0	0	0	0	0	0	0	0	0	1.608
7.3592	0	0	0	0	0	0	0	0	0	0	0	0	0.4595	0	0	0	0	0	0	0	4.135	0	4.8243	0	0	0	0	0	0	0	0	0	0	0	0	0	0	0	0	0	0	0	0	0	0	0	0	0	1.608
7.3686	0	0	0	0	0	0	0	0	0	0	0	0	0.4595	0	0	0	0	0	0	0	4.365	0	5.0541	0	0	0	0	0	0	0	0	0	0	0	0	0	0	0	0	0	0	0	0	0	0	0	0	0	1.838
7.378	0	0	0	0	0	0	0	0	0	0	0	0	0	0	0	0	0	0	0	0	3.216	0	5.5135	0	0	0	0	0	0	0	0	0	0	0	0	0	0	0	0	0	0	0	0	0	0	0	0	0	1.838
7.3874	0	0	0	0	0	0	0	0	0	0	0	0	0.4595	0	0	0	0	0	0	0	2.527	0	6.4324	0	0	0	0	0	0	0	0	0	0	0	0	0	0	0	0	0	0	0	0	0	0	0	0	0	1.378
7.3967	0	0	0	0	0	0	0	0	0	0	0	0	0.4595	0	0	0	0	0	0	0	2.986	0	7.1216	0	0	0	0	0	0	0	0	0	0	0	0	0	0	0	0	0	0	0	0	0	0	0	0	0	1.608
7.4061	0	0	0	0	0	0	0	0	0	0	0	0	0.2297	0	0	0	0	0	0	0	2.757	0	7.8108	0	0	0	0	0	0	0	0	0	0	0	0	0	0	0	0	0	0	0	0	0	0	0	0	0	1.378
7.4155	0	0	0	0	0.23	0	0	0	0	0	0	0	0.4595	0	0	0	0	0	0	0	2.297	0	8.2703	0	0	0	0	0	0	0	0	0	0	0	0	0	0	0	0	0	0	0	0	0	0	0	0	0	1.149
7.4249	0	0	0	0	0.689	0	0	0	0	0	0	0	0	0	0.23	0	0	0	0	0	3.446	0	8.0405	0	0	0	0	0	0	0	0	0	0	0	0	0	0	0	0	0	0	0	0	0	0	0	0	0	1.608
7.4342	0	0	0.23	0	0.919	0	0	0	0	0	0	0	0	0	0.459	0	0	0	0	0	2.757	0	7.1216	0	0	0	0	0	0	0	0	0	0	0	0	0	0	0	0	0	0	0	0	0	0	0	0	0	1.838
7.4436	0	0	0.23	0	0.689	0	0	0	0	0	0	0	0	0	0.23	0	0	0	0	0	2.068	0	8.7297	0	0	0	0	0	0	0	0	0	0	0	0	0	0	0	0	0	0	0	0	0	0	0	0	0	1.838
7.453	0	0	0	0	0.459	0	0	0	0	0	0	0	0	0	0.23	0	0	0	0	0	2.757	0	10.5676	0	0	0	0	0	0	0	0	0	0	0	0	0	0	0	0	0	0	0	0	0	0	0	0	0	2.068
7.4624	0	0	0	0	0.689	0	0	0	0	0	0	0	0.2297	0	0	0	0	0	0	0	2.757	0	10.1081	0	0	0	0	0	0	0	0	0	0	0	0	0	0	0	0	0	0	0	0	0	0	0	0	0	2.297
7.4717	0	0	0	0	0.23	0	0	0	0	0	0	0	0.4595	0	0	0	0	0	0	0	3.446	0	9.6486	0	0	0	0	0	0	0	0	0	0	0	0	0	0	0	0	0	0	0	0	0	0	0	0	0	2.068
7.4811	0	0	0	0	0.23	0	0	0	0	0	0	0	0.9189	0	0	0	0	0	0	0	3.676	0	9.1892	0	0	0	0	0	0	0	0	0	0	0	0	0	0	0	0	0	0	0	0	0	0	0	0	0	2.068
7.4905	0	0	0	0	0.23	0	0	0	0	0	0	0	0.9189	0	0	0	0	0	0	0	5.054	0	10.3378	0	0	0	0	0	0	0	0	0	0	0	0	0	0	0	0	0	0	0	0	0	0	0	0	0	2.297
7.4999	0	0	0	0	0.23	0	0.23	0	0	0	0	0	0.6892	0	0	0	0	0	0.459	0	5.743	0	10.3378	0	0	0	0	0	0	0	0	0	0	0	0	0	0	0	0	0	0	0	0	0	0	0	0	0	2.068
7.5092	0	0	0	0	0	0	0	0	0	0	0	0	0.4595	0	0	0	0	0	0.459	0	5.743	0	10.3378	0	0	0	0	0	0	0	0	0	0	0	0	0	0	0	0	0	0	0	0	0	0	0	0	0	2.068
7.5186	0	0	0	0	0.23	0	0	0	0	0	0	0	0	0	0	0	0	0	0.459	0	5.514	0	8.9595	0	0	0	0	0	0	0	0	0	0	0	0	0	0	0	0	0	0	0	0	0	0	0	0	0	2.068
7.528	0	0	0	0	0.23	0	0.23	0	0	0	0	0	0	0	0.23	0.23	0	0	0.23	0	3.676	0	8.7297	0	0	0	0	0	0	0	0	0	0	0	0	0	0	0	0	0	0	0	0	0	0	0	0	0	2.297
7.5374	0	0	0	0	0.459	0	0.23	0	0	0	0	0	0.4595	0	0.23	0	0	0	0	0	3.216	0	10.5676	0	0	0	0	0	0	0	0	0	0	0	0	0	0	0	0	0	0	0	0	0	0	0	0	0	2.297
7.5467	0	0	0	0	0.459	0	0	0	0	0	0	0	0	0	0	0	0	0	0	0	3.676	0	9.6486	0	0	0	0	0	0	0	0	0	0	0	0	0	0	0	0	0	0	0	0	0	0	0	0	0	2.527
7.5561	0	0	0	0	0.689	0	0	0	0	0	0	0	0	0	0	0.459	0	0	0	0	3.446	0	9.6486	0	0	0	0	0	0	0	0	0	0	0	0	0	0	0	0	0	0	0	0	0	0	0	0	0	2.757
7.5655	0	0	0	0	0.919	0	0	0	0	0	0	0	0	0	0	0.689	0	0	0	0	2.986	0	10.1081	0	0	0	0	0	0	0	0	0	0	0	0	0	0	0	0	0	0	0	0	0	0	0	0	0	2.757
7.5749	0	0	0	0	0.919	0	0	0	0	0	0	0	0	0	0	0.459	0	0	0	0	2.297	0	11.027	0	0	0	0	0	0	0	0	0	0	0	0	0	0	0	0	0	0	0	0	0	0	0	0	0	2.527
7.5842	0	0	0	0	0.919	0	0	0	0	0	0	0	0	0	0	0	0	0	0	0	1.838	0	9.6486	0	0	0	0	0	0	0	0	0	0	0	0	0	0	0	0	0	0	0	0	0	0	0	0	0	2.527
7.5936	0	0	0	0	0.689	0	0	0	0	0	0	0	0	0	0	0	0	0	0	0	2.068	0	8.2703	0	0	0	0	0	0	0	0	0	0	0	0	0	0	0	0	0	0	0	0	0	0	0	0	0	2.297
7.603	0	0	0	0	0.689	0	0.23	0	0	0	0	0	0	0	0.459	0	0	0	0	0	2.757	0	8.7297	0	0	0	0	0	0	0	0	0	0	0	0	0	0	0	0	0	0	0	0	0	0	0	0	0	2.527
7.6124	0	0	0	0	0	0	0	0	0	0	0	0	0	0	0.23	0	0	0	0	0	2.986	0	8.5	0	0	0	0	0	0	0	0	0	0	0	0	0	0	0	0	0	0	0	0	0	0	0	0	0	2.527
7.6217	0	0	0	0	0	0	0	0	0	0	0	0	0	0	0	0	0	0	0	0	4.365	0	7.5811	0	0	0	0	0	0	0	0	0	0	0	0	0	0	0	0	0	0	0	0	0	0	0	0	0	2.527
7.6311	0	0	0	0	0	0	0	0	0	0	0	0	0	0	0	0	0	0	0	0	2.757	0	8.2703	0	0	0	0	0	0	0	0	0	0	0	0	0	0	0	0	0	0	0	0	0	0	0	0	0	2.757
7.6405	0	0	0	0	0	0	0	0	0	0	0	0	0	0	0	0	0	0	0	0	3.905	0	8.5	0	0	0	0	0	0	0	0	0	0	0	0	0	0	0	0	0	0	0	0	0	0	0	0	0	3.216
7.6499	0	0	0	0	0	0	0	0	0	0	0	0	0.4595	0	0	0	0	0	0	0	3.905	0	9.1892	0	0	0	0	0	0	0	0	0	0	0	0	0	0	0	0	0	0	0	0	0	0	0	0	0	2.986
7.6592	0	0	0	0	0	0	0	0	0	0	0	0	0.4595	0	0	0	0	0	0	0	5.054	0	9.4189	0	0	0	0	0	0	0	0	0	0	0	0	0	0	0	0	0	0	0	0	0	0	0	0	0	2.986
7.6686	0	0	0	0	0	0	0	0	0	0	0	0	0.9189	0	0	0.23	0	0	0	0	4.595	0	10.7973	0	0	0	0	0	0	0	0	0	0	0	0	0	0	0	0	0	0	0	0	0	0	0	0	0	2.757
7.678	0	0	0	0	0	0	0	0	0	0	0	0	0.6892	0	0	0.919	0.689	0	0	0	4.824	0	9.4189	0	0	0	0	0	0	0	0	0	0	0	0	0	0	0	0	0	0	0	0	0	0	0	0	0	2.986
7.6873	0	0	0	0	0	0	0	0	0	0	0	0	0.6892	0	0	1.149	0.919	0	0.23	0	3.905	0	8.0405	0	0	0	0	0	0	0	0	0	0	0	0	0	0	0	0	0	0	0	0	0	0	0	0	0	3.216
7.6967	0	0	0	0	0	0	0.23	0	0	0	0	0	0.6892	0	0	0.919	0.919	0	0	0	4.365	0	7.1216	0	0	0	0	0	0	0	0	0	0	0	0	0	0	0	0	0	0	0	0	0	0	0	0	0	3.216
7.7061	0	0	0	0	0.23	0	0	0	0	0	0	0	0.6892	0	0	0.23	0.459	0	0	0	4.595	0	7.5811	0	0	0	0	0	0	0	0	0	0	0	0	0	0	0	0	0	0	0	0	0	0	0	0	0	2.986
7.7155	0	0	0	0	0.459	0	0	0	0	0	0	0	1.1486	0	0	0	0.689	0	0	0	3.905	0	8.0405	0	0	0	0	0	0	0	0	0	0	0	0	0	0	0	0	0	0	0	0	0	0	0	0	0	3.446
7.7248	0	0	0	0	0.689	0	0	0	0	0	0	0	1.1486	0	0	0	0.23	0	0	0	2.068	0	8.7297	0	0	0	0	0	0	0	0	0	0	0	0	0	0	0	0	0	0	0	0	0	0	0	0	0	3.446
7.7342	0	0	0	0	0.23	0	0	0	0	0	0	0	0.6892	0	0	0.23	0.23	0	0	0	2.757	0	8.5	0.2297	0	0	0	0	0	0	0	0	0	0	0	0	0	0	0	0	0	0	0	0	0	0	0	0	3.216
7.7436	0	0	0	0	0	0	0	0	0	0	0	0	0.6892	0	0	0.23	0	0	0	0	3.216	0	8.9595	0	0	0	0	0	0	0	0	0	0	0	0	0	0	0	0	0	0	0	0	0	0	0	0	0	2.757
7.753	0	0	0	0	0	0	0.459	0	0	0	0	0	0.2297	0	0	0	0.23	0	0.919	0	3.905	0	8.7297	0	0	0	0	0	0	0	0	0	0	0	0	0	0	0	0	0	0	0	0	0	0	0	0	0	2.986
7.7623	0	0	0	0	0	0	0.689	0.459	0	0	0	0	0	0	0	0	0.23	0	0.689	0	5.054	0	9.4189	0	0	0	0	0	0	0	0	0	0	0	0	0	0	0	0	0	0	0	0	0	0	0	0	0	3.446
7.7717	0.4595	0	0	0	0	0	0.919	0.459	0	0	0	0	0	0	0.23	0.23	0	0	0.689	0	4.824	0	10.1081	0	0	0	0	0	0	0	0	0	0	0	0	0	0	0	0	0	0	0	0	0	0	0	0	0	3.216
7.7811	0	0	0	0	0.23	0	0.459	0	0	0	0	0	0	0	0.23	0	0.23	0	0.23	0	2.527	0	10.1081	0	0	0	0	0	0	0	0	0	0	0	0	0	0	0	0	0	0	0	0	0	0	0	0	0	3.216
7.7905	0	0	0	0	0.23	0	0.459	0	0	0	0	0	0	0	0.23	0	0.459	0	0	0	1.378	0	8.9595	0	0	0	0	0	0	0	0	0	0	0	0	0	0	0	0	0	0	0	0	0	0	0	0	0	3.216
7.7998	0	0	0	0	0.23	0	0	0	0	0	0	0	0	0	0	0	1.149	0	0	0	1.378	0	8.5	0	0	0	0	0	0	0	0	0	0	0	0	0	0	0	0	0	0	0	0	0	0	0	0	0	3.216
7.8092	0	0	0	0	0.459	0	0	0	0	0	0	0	0.4595	0	0	0	2.068	0	0	0	1.378	0	8.5	0	0	0	0	0	0	0	0	0	0	0	0	0	0	0	0	0	0	0	0	0	0	0	0	0	3.446
7.8186	0	0	0	0	0	0	0	0	0	0	0	0	0.2297	0	0	0	2.297	0	0	0	0.689	0	7.8108	0	0	0	0	0	0	0	0	0	0	0	0	0	0	0	0	0	0	0	0	0	0	0	0	0	3.676
7.828	0	0	0	0	0	0	0	0	0	0	0	0	0.2297	0	0	0	2.297	0	0	0	0.689	0	9.8784	0	0	0	0	0	0	0	0	0	0	0	0	0	0	0	0	0	0	0	0	0	0	0	0	0	3.676
7.8373	0	0	0	0	0	0	0	0	0	0	0	0	0.4595	0	0	0	1.838	0	0	0	1.378	0	8.0405	0	0	0	0	0	0	0	0	0	0	0	0	0	0	0	0	0	0	0	0	0	0	0	0	0	3.446
7.8467	0	0	0	0	0	0	0	0	0	0	0	0	1.3784	0	0	0.23	1.149	0	0	0	2.297	0	9.1892	0	0	0	0	0	0	0	0	0	0	0	0	0	0	0	0	0	0	0	0	0	0	0	0	0	3.676
7.8561	0	0	0	0	0	0	0	0	0	0	0	0	2.2973	0	0	0	1.378	0	0	0	1.838	0	9.4189	0	0	0	0	0	0	0	0	0	0	0	0	0	0	0	0	0	0	0	0	0	0	0	0	0	3.905
7.8655	0	0	0	0	0	0	0	0	0	0	0	0	1.8378	0	0	0.23	0.919	0	0	0	1.838	0	6.6622	0	0	0	0	0	0	0	0	0	0	0	0	0	0	0	0	0	0	0	0	0	0	0	0	0	3.905
7.8748	0	0	0	0	0	0	0	0	0	0	0	0	1.8378	0	0	0	0.919	0	0	0	0.689	0	8.2703	0	0	0	0	0	0	0	0	0	0	0	0	0	0	0	0	0	0	0	0	0	0	0	0	0	3.676
7.8842	0	0	0	0	0	0	0	0	0	0	0	0	1.1486	0	0	0	0.689	0	0	0	0.689	0	6.8919	0	0	0	0	0	0	0	0	0	0	0	0	0	0	0	0	0	0	0	0	0	0	0	0	0	3.676
7.8936	0	0	0	0	0	0	0	0	0	0	0	0	0	0	0	0	0.689	0	0	0	1.149	0	6.8919	0	0	0	0	0	0	0	0	0	0	0	0	0	0	0	0	0	0	0	0	0	0	0	0	0	3.446
7.903	0	0	0	0	0	0	0	0	0	0	0	0	0	0	0	0	0.23	0	0	0	1.608	0	7.1216	0	0	0.23	0	0	0	0	0	0	0	0	0	0	0	0	0	0	0	0	0	0	0	0	0	0	3.446
7.9123	0	0	0	0	0	0	0.23	0	0	0	0	0	0	0	0	0	0	0	0	0	1.608	0	8.2703	0	0	0.23	0	0	0	0	0	0	0	0	0	0	0	0	0	0	0	0	0	0	0	0	0	0	2.986
7.9217	0	0	0	0	0	0	0.919	0	0	0	0	0	0	0	0	0	0	0	0	0	3.216	0	8.9595	0	0	0.23	0	0	0	0	0	0	0	0	0	0	0	0	0	0	0	0	0	0	0	0	0	0	2.757
7.9311	0	0	0	0	0	0	1.149	0	0	0	0	0	0	0	0	0	0	0	0	0	3.676	0	11.027	0	0	0.23	0	0	0	0	0	0	0	0	0	0	0	0	0	0	0	0	0	0	0	0	0	0	2.986
7.9405	0	0	0	0	0	0	1.378	0	0	0	0	0	0	0	0	0	0	0	0	0	5.284	0	10.1081	0	0	0	0	0	0	0	0	0	0	0	0	0	0	0	0	0	0	0	0	0	0	0	0	0	2.757
7.9498	0	0	0	0	0	0	1.378	0	0	0	0	0	0	0	0	0	0	0	0	0	5.284	0	9.6486	0	0	0	0	0	0	0	0	0	0	0	0	0	0	0	0	0	0	0	0	0	0	0	0	0	3.216
7.9592	0	0	0	0	0	0	1.378	0	0	0	0	0	0	0	0	0	0	0	0	0	6.432	0	8.9595	0	0	0	0	0	0	0	0	0	0	0	0	0	0	0	0	0	0	0	0	0	0	0	0	0	3.446
7.9686	0	0	0	0	0	0	1.608	0	0	0	0	0	0	0	0	0	0	0	0	0	6.203	0	9.1892	0	0	0	0	0	0	0	0	0	0	0	0	0	0	0	0	0	0	0	0	0	0	0	0	0	3.676
7.978	0	0	0	0	0	0	1.378	0	0	0	0	0	0.2297	0	0	0	0	0	0	0	8.041	0	10.1081	0	0	0	0	0	0	0	0	0	0	0	0	0	0	0	0	0	0	0	0	0	0	0	0	0	4.135
7.9873	0	0	0	0	0	0	1.378	0	0	0	0	0	0	0	0	0	0.459	0	0	0	7.811	0	9.8784	0	0	0	0	0	0	0	0	0	0	0	0	0	0	0	0	0	0	0	0	0	0	0	0	0	3.676
7.9967	0	0	0	0	0	0	1.378	0	0	0	0	0	0	0	0	0.23	0.23	0	0	0	7.122	0	7.3514	0	0	0	0	0	0	0	0	0	0	0	0	0	0	0	0	0	0	0	0	0	0	0	0	0	3.905
8.0061	0	0	0	0	0	0	2.297	0	0	0	0	0	0	0	0	0	0.689	0	0	0	5.973	0	9.4189	0	0	0	0	0	0	0	0	0	0	0	0	0	0	0	0	0	0	0	0	0	0	0	0	0	3.905
8.0155	0	0	0	0	0	0	1.838	0	0	0	0	0	0	0	0	0.23	0	0	0	0	5.054	0	8.5	0	0	0	0	0	0	0	0	0	0	0	0	0	0	0	0	0	0	0	0	0	0	0	0	0	4.135
8.0248	0	0	0	0	0	0	1.378	0	0	0	0	0	0.2297	0	0	0	0	0	0	0	5.054	0	7.8108	0	0	0	0	0	0	0	0	0	0	0	0	0	0	0	0	0	0	0	0	0.23	0.23	0	0	0	4.135
8.0342	0	0	0	0	0	0	1.608	0	0.4595	0	0	0	0.9189	0	0	0.23	0	0	0	0	4.365	0	7.3514	0	0	0	0	0	0	0	0	0	0	0	0	0	0	0	0	0	0	0	0	0	0	0	0	0	3.676
8.0436	0	0	0	0	0	0	1.608	0	0.6892	0	0	0	0.9189	0	0	0.23	0	0	0	0	2.986	0	5.5135	0	0	0	0	0	0	0	0	0	0	0	0	0	0	0	0	0	0	0	0	0	0	0	0	0	3.905
8.053	0	0	0	0	0	0	1.838	0	0	0	0	0	1.1486	0	0	0	0	0	0	0	3.216	0	5.2838	0	0	0	0	0	0	0	0	0	0	0	0	0	0	0	0	0	0	0	0	0	0	0	0	0	3.446
8.0623	0	0	0	0	0	0	1.838	0	0	0	0	0	0.9189	0	0	0.23	0	0	0	0	3.676	0	6.4324	0	0	0	0	0	0	0	0	0	0	0	0	0	0	0	0	0	0	0	0	0	0	0	0	0	3.446
8.0717	0	0	0	0	0	0	1.378	0	0	0	0	0	0.6892	0	0	0	0.23	0	0	0	3.905	0	8.2703	0	0	0	0	0	0	0	0	0	0	0	0	0	0	0	0	0	0	0	0	0	0	0	0	0	3.446
8.0811	0	0	0	0	0.689	0	1.378	0	0	0	0	0	0	0	0	0	0.23	0	0	0	2.986	0	9.1892	0	0	0	0	0	0	0	0	0	0	0	0	0	0	0	0	0	0	0	0	0	0	0	0	0	3.446
8.0905	0	0	0	0	0.689	0	0.919	0	0	0	0	0	0.2297	0	0	0	0.459	0	0	0	2.297	0	9.1892	0	0	0	0	0	0	0	0	0	0	0	0	0	0	0	0	0	0	0	0	0	0	0	0	0	3.446
8.0998	0.2297	0	0	0	0.689	0	0.919	0	0	0	0	0	0.4595	0	0	0	1.608	0	0	0	1.378	0	7.8108	0	0	0	0	0	0	0	0	0	0	0	0	0	0	0	0	0	0	0	0	0	0	0	0	0	3.676
8.1092	0	0	0	0	0.919	0	0.689	0	0	0	0	0	0.4595	0	0	0	2.527	0	0	0	1.608	0	8.0405	0	0	0	0	0	0	0	0	0	0	0	0	0	0	0	0	0	0	0	0	0	0	0	0	0	3.676
8.1186	0	0	0	0	0.919	0	0.459	0	0	0	0	0	0.4595	0	0	0	2.986	0	0	0	2.527	0	8.0405	0	0	0	0	0	0	0	0	0	0	0	0	0	0	0	0	0	0	0	0	0	0	0	0	0	3.676
8.128	0	0	0	0	1.378	0	0.23	0	0	0	0	0	0	0	0	0	4.365	0	0	0	2.297	0	7.3514	0	0	0	0	0	0	0	0	0	0	0	0	0	0	0	0	0	0	0	0	0	0	0	0	0	4.595
8.1373	0	0	0	0	1.149	0	0	0	0	0	0	0	0	0	0	0	3.446	0	0	0	2.527	0	7.5811	0	0	0	0	0	0	0	0	0	0	0	0	0	0	0	0	0	0	0	0	0	0	0	0	0	4.824
8.1467	0	0	0	0	0.689	0	0	0	0	0	0	0	0	0	0	0	3.446	0	0	0	2.527	0	8.2703	0	0	0	0	0	0	0	0	0	0	0	0	0	0	0	0	0	0	0	0	0	0	0	0	0	5.054
8.1561	0	0	0	0	0.459	0	0	0	0	0	0	0	0.4595	0	0	0	3.446	0	0	0	1.838	0	7.8108	0	0	0	0	0	0	0	0	0	0	0	0	0	0	0	0	0	0	0	0	0	0	0	0	0	6.203
8.1655	0	0	0	0	0.919	0	0	0	0	0	0	0	0.4595	0	0	0	3.905	0	0	0	1.608	0	7.1216	0	0	0	0	0	0	0	0	0	0	0	0	0	0	0	0	0	0	0	0	0	0	0	0	0	7.811
8.1748	0	0	0	0	0.689	0	0	0	0	0	0	0	0.6892	0	0	0	3.446	0	0	0	2.297	0	7.8108	0	0	0	0	0	0	0	0	0	0	0	0	0	0	0	0	0	0	0	0	0	0	0	0	0	7.122
8.1842	0	0	0	0	0.919	0	0	0	0	0	0	0	0.4595	0	0	0	4.135	0	0	0	2.068	0	8.5	0	0	0	0	0	0	0	0	0	0	0	0	0	0	0	0	0	0	0	0	0	0	0	0	0	7.811
8.1936	0	0	0	0	1.149	0	0	0	0	0	0	0	0.6892	0	0	0	2.527	0	0	0	1.838	0	10.5676	0	0	0	0	0	0	0	0	0	0	0	0	0	0	0	0	0	0	0	0	0	0	0	0	0	7.811
8.203	0	0	0	0	0.689	0	0	0	0	0	0	0	0.4595	0	0	0	2.527	0	0	0	2.068	0	10.7973	0	0	0	0	0	0	0	0	0	0	0	0	0	0	0	0	0	0	0	0	0	0	0	0	0	7.811
8.2123	0	0	0	0	0.23	0	0	0	0	0	0	0	0.6892	0	0	0	0.919	0	0	0	2.297	0	10.1081	0	0	0	0	0	0	0	0	0	0	0	0	0	0	0	0	0	0	0	0	0	0	0	0	0	8.27
8.2217	0	0	0	0	0	0	0	0	0	0	0	0	0.4595	0	0	0	0.689	0	0	0	2.527	0	10.1081	0	0	0	0	0	0	0	0	0	0	0	0	0	0	0	0	0	0	0	0	0	0	0	0	0	9.419
8.2311	0	0	0	0	0	0	0	0	0	0	0	0	0.2297	0	0	0	0.919	0	0	0	4.135	0	11.2568	0	0	0	0	0	0	0	0	0	0	0	0	0	0	0	0	0	0	0	0	0	0	0	0	0	9.419
8.2405	0	0	0	0	0	0	0	0	0	0	0	0	0	0	0	0	0	0	0	0	4.365	0	9.8784	0	0	0	0	0	0	0	0	0	0	0	0	0	0	0	0	0	0	0	0	0	0	0	0	0	9.419
8.2498	0	0	0	0	0	0	0	0	0	0	0	0	0	0	0	0.23	0	0	0	0	4.365	0	9.8784	0	0	0	0	0	0	0	0	0	0	0	0	0	0	0	0	0	0	0	0	0	0	0	0	0	9.419
8.2592	0	0	0	0	0	0	0	0	0	0	0	0	0.6892	0.23	0	0.459	0	0	0	0	4.824	0	12.4054	0	0	0	0	0	0	0	0	0	0	0	0	0	0	0	0	0	0	0	0	0	0	0	0	0	9.419
8.2686	0	0	0	0	0	0	0	0	0	0	0	0	0.9189	0.459	0	0.23	0	0	0.23	0	5.514	0	12.1757	0	0	0	0	0	0	0	0	0	0	0	0	0	0	0	0	0	0	0	0	0	0	0	0	0	10.108
8.278	0	0	0	0	0	0	0	0	0	0	0	0	1.6081	0.23	0	0.459	0	0	0.23	0	5.514	0	10.3378	0	0	0	0	0	0	0	0	0	0	0	0	0	0	0	0	0	0	0	0	0	0	0	0	0	10.568
8.2873	0	0	0	0	0	0	0	0	0	0	0	0	1.8378	0	0	0.459	0	0	0	0	5.284	0	10.5676	0	0	0	0	0	0	0	0	0	0	0	0	0	0	0	0	0	0	0	0	0	0	0	0	0	10.797
8.2967	0	0	0.23	0	0	0	0	0	0	0	0	0	2.2973	0.459	0	0	0	0	0	0	6.203	0	12.6351	0	0	0	0	0	0	0	0	0	0	0	0	0	0	0	0	0	0	0	0	0	0	0	0	0	11.486
8.3061	0	0	0	0	0	0	0	0	0	0	0	0	2.0676	0.459	0	0	0	0	0	0	6.203	0	11.7162	0	0	0	0	0	0	0	0	0	0	0	0	0	0	0	0	0	0	0	0	0	0	0	0	0	10.568
8.3155	0	0	0	0	0	0	0	0	0	0	0	0	2.0676	0	0	0	0	0	0	0	6.892	0	11.4865	0	0	0	0	0	0	0	0	0	0	0	0	0	0	0	0	0	0	0	0	0	0	0	0	0	11.027
8.3248	0	0	0	0	0	0	0	0	0	0	0	0	0.4595	0	0	0	0	0	0	0	6.662	0	10.5676	0	0	0	0	0	0	0	0	0	0	0	0	0	0	0	0	0	0	0	0	0	0	0	0	0	11.486
8.3342	0	0	0	0	0.23	0	0	0	0	0	0	0	1.1486	0	0	0	0	0	0	0	6.203	0	10.1081	0	0	0	0	0	0	0	0	0	0	0	0	0	0	0	0	0	0	0	0	0	0	0	0	0	10.108
8.3436	0	0	0	0	0.459	0	0	0	0	0	0	0	0.9189	0	0.23	0	0	0	0	0	6.203	0	11.2568	0	0	0	0	0	0	0	0	0	0	0	0	0	0	0	0	0	0	0	0	0	0	0	0	0	11.027
8.353	0	0	0	0	0	0	0	0	0	0	0	0	1.3784	0	0.459	0	0	0	0	0	6.203	0	11.7162	0	0	0	0	0	0	0	0	0	0	0	0	0	0	0	0	0	0	0	0	0	0	0	0	0	11.716
8.3623	0	0	0	0	0	0	0	0.459	0	0	0	0	1.8378	0	0.23	0.23	0	0	0	0	7.122	0	11.9459	0	0	0	0	0	0	0	0	0	0	0	0	0	0	0	0	0	0	0	0	0	0	0	0	0	11.027
8.3717	0	0	0	0	0	0	0	0.459	0	0	0	0	1.3784	0	0	0.459	0	0	0	0	7.811	0	11.9459	0	0	0	0	0	0	0	0	0	0	0	0	0	0	0	0	0	0	0	0	0	0	0	0	0	11.716
8.3811	0	0	0	0	0	0	0	0	0	0	0	0	1.3784	0	0.23	1.149	0	0	0	0	7.811	0	12.8649	0	0	0	0	0	0	0	0	0	0	0	0	0	0	0	0	0	0	0	0	0	0	0	0	0	12.405
8.3905	0	0	0	0	0	0	0	0	0	0	0	0	1.3784	0	0.23	0.459	0	0	0	0	8.73	0	11.9459	0	0	0	0	0	0	0	0	0	0	0	0	0	0	0	0	0	0	0	0	0	0	0	0	0	12.405
8.3998	0	0	0	0	0	0	0	0	0	0	0	0	1.1486	0	0	0.919	0	0	0	0	7.811	0	13.0946	0	0	0	0	0	0	0	0	0	0	0	0	0	0	0	0	0	0	0	0	0	0	0	0	0	12.176
8.4092	0	0	0	0	0	0	0	0	0	0	0	0	0.6892	0	0	1.149	0	0	0	0	8.27	0	13.0946	0	0	0	0	0	0	0	0	0	0	0	0	0	0	0	0	0	0	0	0	0	0	0	0	0	10.797
8.4186	0	0	0	0	0	0	0	0	0	0	0	0	0.6892	0	0	0.689	0	0	0	0	8.27	0	11.4865	0.2297	0	0	0	0	0	0	0	0	0	0	0	0	0	0	0	0	0	0	0	0	0	0	0	0	10.797
8.428	0	0	0	0	0	0	0	0	0	0	0	0	0.6892	0	0	1.149	0	0	0	0	8.27	0	12.4054	0.4595	0	0	0	0	0	0	0	0	0	0	0	0	0	0	0	0	0	0	0	0	0	0	0	0	10.797
8.4373	0	0	0	0	0	0	0	0	0	0	0	0	0	0	0	1.378	0	0	0	0	8.5	0	13.5541	0	0	0	0	0	0	0	0	0	0	0	0	0	0	0	0	0	0	0	0	0	0	0	0	0	10.338
8.4467	0	0	0	0	0	0	0	0	0	0	0	0	0	0	0	0.459	0	0	0	0	6.203	0	12.1757	0	0	0	0	0	0	0	0	0	0	0	0	0	0	0	0	0	0	0	0	0	0	0	0	0	8.5
8.4561	0	0	0	0	0	0	0	0	0	0	0	0	0.4595	0	0	0.689	0	0	0	0	6.662	0	13.5541	0	0	0	0	0	0	0	0	0	0	0	0	0	0	0	0	0	0	0	0	0	0	0	0	0	8.73
8.4655	0	0	0	0	0.459	0	0	0	0	0	0	0	0.6892	0	0	0.459	0	0	0	0	6.892	0	11.9459	0	0	0	0	0	0	0	0	0	0	0	0	0	0	0	0	0	0	0	0	0	0	0	0	0	7.811
8.4748	0	0	0	0	0.459	0	0	0	0	0	0	0	0	0	0.23	0.459	0	0	0	0	6.432	0	10.5676	0	0	0.23	0	0	0	0	0	0	0	0	0	0	0	0	0	0	0	0	0	0	0	0	0	0	8.73
8.4842	0	0	0	0	0.689	0	0	0	0	0	0	0	0	0	0	0	0	0	0	0	6.203	0	11.4865	0	0	0	0	0	0	0	0	0	0	0	0	0	0	0	0	0	0	0	0	0	0	0	0	0	9.649
8.4936	0	0	0	0	0	0	0	0	0	0	0	0	0	0	0	0	0	0	0	0	7.581	0	9.8784	0	0	0	0	0	0	0	0	0	0	0	0	0	0	0	0	0	0	0	0	0	0	0	0	0	10.568
8.503	0	0	0	0	0	0	0	0	0	0	0	0	0	0	0	0	0	0	0	0	5.973	0	8.7297	0	0	0	0	0	0	0	0	0	0	0	0	0	0	0	0	0	0	0	0	0	0	0	0	0	11.257
8.5123	0	0	0	0	0	0	0	0	0	0	0	0	0	0	0	0	0	0	0	0	7.122	0	9.4189	0	0	0	0	0	0	0	0	0	0	0	0	0	0	0	0	0	0	0	0	0	0	0	0	0	10.108
8.5217	0	0	0	0	0	0	0	0	0	0	0	0	0	0	0	0	0	0	0	0	7.811	0	9.8784	0	0	0	0	0	0	0	0	0	0	0	0	0	0	0	0	0	0	0	0	0	0	0	0	0	9.878
8.5311	0	0	0	0	0	0	0	0	0	0	0	0	0	0	0	0	0	0	0	0	8.041	0	8.9595	0	0	0	0	0	0	0	0	0	0	0	0	0	0	0	0	0	0	0	0	0	0	0	0	0	9.419
8.5405	0	0	0	0	1.149	0	0	0	0	0	0	0	0.4595	0	0	0	0	0	0	0	7.351	0	9.1892	0	0	0	0	0	0	0	0	0	0	0.23	0	0	0	0	0	0	0	0	0	0	0	0	0	0	8.27
8.5498	0	0	0.23	0	0.919	0	0	0	0	0	0	0	0.6892	0	0	0	0	0	0.23	0	7.811	0	11.2568	0	0	0	0	0	0	0	0	0	0	0	0	0	0	0	0	0	0	0	0	0	0	0	0	0	8.041
8.5592	0	0	0.23	0	0.23	0	0	0	0	0	0	0	1.1486	0	0	0	0	0	0	0	5.743	0	11.7162	0	0	0	0	0	0	0	0	0	0	0	0	0	0	0	0	0	0	0	0	0	0	0	0	0	8.27
8.5686	0	0	0.23	0	0.23	0	0	0	0	0	0	0	1.1486	0	0	0	0	0	0	0	6.203	0	12.8649	0	0	0	0	0	0	0	0	0	0	0	0	0	0	0	0	0	0	0	0	0	0	0	0	0	7.581
8.578	0	0	0.23	0	0.23	0	0	0	0	0	0	0	1.1486	0	0	0	0	0	0	0	5.743	0	12.6351	0	0	0	0	0	0	0	0	0	0	0	0	0	0	0	0	0	0	0	0	0	0	0	0	0	6.203
8.5873	0	0	0	0	0.459	0	0	0	0	0	0	0	0.2297	0	0	0	0	0	0	0	5.743	0	10.3378	0	0	0	0	0	0	0	0	0	0	0	0	0	0	0	0	0	0	0	0	0	0	0	0	0	5.743
8.5967	0	0	0	0	0.919	0	0	0	0	0	0	0	0	0	0	0	0	0	0	0	5.514	0	11.2568	0	0	0	0	0	0	0	0	0	0	0	0	0	0	0	0	0	0	0	0	0	0	0.23	0	0	5.973
8.6061	0	0	0	0	1.378	0	0	0	0	0	0	0	0	0	0	0	0	0	0	0	5.284	0	10.7973	0	0	0	0	0	0	0	0	0	0	0	0	0	0	0	0	0	0	0	0	0	0	0	0	0	4.824
8.6155	0	0	0	0	1.608	0	0	0	0	0	0	0	0	0	0	0	0	0	0	0	4.135	0	10.3378	0	0	0	0	0	0	0	0	0	0	0	0	0	0	0	0	0	0	0	0	0	0	0	0	0	4.595
8.6248	0	0	0	0	1.378	0	0	0	0	0	0	0	0	0	0	0.23	0	0	0	0	5.743	0	11.027	0	0	0	0	0	0	0	0	0	0	0	0	0	0	0	0	0	0	0	0	0	0	0	0	0	4.824
8.6342	0	0	0	0	0.689	0	0	0	0	0	0	0	0	0	0	0.459	0	0	0	0	7.811	0	10.7973	0	0	0	0	0	0	0	0	0	0	0	0	0	0	0	0	0	0	0	0	0	0	0	0	0	4.824
8.6436	0.2297	0	0	0	0	0	0	0	0	0	0	0	0	0	0	0.23	0	0	0.23	0	8.5	0	11.9459	0	0	0	0	0	0	0	0	0	0	0	0	0	0	0	0	0	0	0	0	0	0	0	0	0	5.284
8.653	0.2297	0	0	0	0	0	0	0	0	0	0	0	0	0	0	0	0	0	0	0	6.662	0	11.027	0	0	0	0	0	0	0	0	0	0	0	0	0	0	0	0	0	0	0	0	0	0	0	0	0	5.284
8.6623	0.2297	0	0	0	0	0	0	0	0	0	0	0	0	0	0	0	0	0	0.459	0	6.662	0	12.4054	0	0	0	0	0	0	0	0	0	0	0	0	0	0	0	0	0	0	0	0	0	0	0	0	0	5.054
8.6717	0	0	0	0	0	0	0	0	0	0	0	0	0	0	0	0.459	0	0	0	0	5.054	0	12.1757	0	0	0	0	0	0	0	0	0	0	0	0	0	0	0	0	0	0	0	0	0	0	0	0	0	4.135
8.6811	0	0	0	0	0	0	0	0	0	0	0	0	0	0	0	0.23	0	0	0	0	5.973	0	13.3243	0	0	0	0	0	0	0	0	0	0	0	0	0	0	0	0	0	0	0	0	0	0	0	0	0	4.135
8.6905	0	0	0	0	0	0	0	0	0	0	0	0	0	0	0	0	0	0	0	0	5.284	0	11.9459	0	0	0	0	0	0	0	0	0	0	0	0	0	0	0	0	0	0	0	0	0	0	0	0	0	3.446
8.6998	0	0	0	0	0	0	0	0	0	0	0	0	0.2297	0	0	0.23	0	0	0	0	4.824	0	10.7973	0	0	0	0	0	0	0	0	0	0	0	0	0	0	0	0	0	0	0	0	0	0	0	0	0	3.446
8.7092	0	0	0	0	0	0	0	0	0	0	0	0	0	0	0	0.23	0	0	0	0	5.054	0	8.9595	0.2297	0	0	0	0	0	0	0	0	0	0	0	0	0	0	0	0	0	0	0	0	0	0	0	0	2.757
8.7186	0	0	0	0	0	0	0	0	0	0	0	0	0	0	0	0.23	0	0	0	0	5.743	0	9.8784	0	0	0	0	0	0	0	0	0	0	0	0	0	0	0	0	0	0	0	0	0	0	0	0	0	2.757
8.728	0	0	0	0	0	0	0	0	0	0	0	0	0	0	0	0.23	0	0	0	0	5.284	0	9.8784	0	0	0	0	0	0	0	0	0	0	0	0	0	0	0	0	0	0	0	0	0	0	0	0	0	2.527
8.7373	0	0	0	0	0	0	0	0	0	0	0	0	0	0	0	0.459	0	0	0	0	6.662	0	9.4189	0	0	0	0	0	0	0	0	0	0	0	0	0	0	0	0	0	0	0	0	0	0	0	0	0	2.757
8.7467	0	0	0	0	0	0	0	0	0	0	0	0	0	0	0	0.459	0	0	0	0	5.514	0	8.5	0	0	0	0	0	0	0	0	0	0	0	0	0	0	0	0	0	0	0	0	0	0	0	0	0	2.986
8.7561	0	0	0	0	0	0	0	0	0	0	0	0	0.2297	0	0	0.23	0	0	0	0	5.973	0	9.8784	0	0	0	0	0	0	0	0	0	0	0	0	0	0	0	0	0	0	0	0	0	0	0	0	0	2.986
8.7655	0	0	0	0	0	0	0	0	0	0	0	0	0.2297	0	0	0.689	0	0	0	0	5.743	0	9.6486	0	0	0	0	0	0	0	0	0	0	0	0	0	0	0	0	0	0	0	0	0	0	0	0	0	3.905
8.7748	0	0	0	0	0.23	0	0	0	0	0	0	0	0	0	0	0.23	0	0	0	0	5.054	0	10.1081	0	0	0	0	0	0	0	0	0	0	0	0	0	0	0	0	0	0	0	0	0	0	0	0	0	4.595
8.7842	0	0	0	0	0	0	0	0	0	0	0	0	0	0	0	0	0	0	0	0	4.824	0	10.5676	0	0	0	0	0	0	0	0	0	0	0	0	0	0	0	0	0	0	0	0	0	0	0	0	0	4.595
8.7936	0	0	0	0	0	0	0	0	0	0	0	0	0.4595	0	0	0.23	0.459	0	0	0	5.743	0	10.5676	0	0	0	0	0	0	0	0	0	0	0	0	0	0	0	0	0	0	0	0	0	0	0	0	0	5.514
8.803	0	0	0	0	0	0	0	0	0	0	0	0	0	0	0	0	0.23	0	0.23	0	5.743	0	9.8784	0.2297	0	0	0	0	0	0	0	0	0	0	0	0	0	0	0	0	0	0	0	0	0	0	0	0	5.054
8.8123	0	0	0	0	0	0	0	0	0	0	0	0	0	0	0	0	0.459	0	0.459	0	5.284	0	9.1892	0.2297	0	0	0	0	0	0	0	0	0	0	0	0	0	0	0	0	0	0	0	0	0	0	0	0	5.284
8.8217	0	0	0	0	0	0	0	0	0	0	0	0	0	0	0	0	0.23	0.2297	0.459	0	5.973	0	9.1892	0.4595	0	0	0	0	0	0	0	0	0	0	0	0	0	0	0	0	0	0	0	0	0	0	0	0	5.284
8.8311	0	0	0	0	0	0	0	0	0	0	0	0	0.2297	0	0	0.23	0	0.6892	0.23	0	5.284	0	8.5	1.1486	0	0	0	0	0	0	0	0	0	0	0	0	0	0	0	0	0	0	0	0	0	0	0	0	5.514
8.8405	0	0	0	0	0	0	0	0	0	0	0	0	0	0	0	0.459	0	0.9189	0	0	6.892	0	8.5	2.2973	0	0	0	0	0	0	0	0	0	0	0	0	0	0	0	0	0	0	0	0	0	0	0	0	5.054
8.8498	0	0	0	0	0	0	0	0	0	0	0	0	0	0	0	0.919	0	1.1486	0	0	8.73	0	9.8784	2.527	0	0	0	0	0	0	0	0	0	0	0	0	0	0	0	0	0	0	0	0	0	0	0	0	5.054
8.8592	0	0	0	0	0	0	0	0	0	0	0	0	0	0	0	0.919	0	0.4595	0	0	10.338	0	10.1081	3.2162	0	0	0	0	0	0	0	0	0	0	0	0	0	0	0	0	0	0	0	0	0	0	0	0	5.284
8.8686	0	0	0	0	0	0	0	0	0	0	0	0	0.2297	0	0	0.919	0	0.2297	0	0	14.014	0	10.7973	2.527	0	0	0	0	0	0	0	0	0	0	0	0	0	0	0	0	0	0	0	0	0	0	0	0	5.054
8.878	0	0	0	0	0	0	0	0	0	0	0	0	0.2297	0	0	0.919	0	0	0	0	14.473	0	10.3378	2.9865	0	0	0	0	0	0	0	0	0	0	0	0	0	0	0	0	0	0	0	0	0	0	0	0	5.514
8.8873	0	0	0	0	0	0	0	0	0	0	0	0	0	0	0.23	0.459	0	0	0	0	12.176	0	9.8784	1.8378	0	0	0	0	0	0	0	0	0	0	0	0	0	0	0	0	0	0	0	0	0	0.23	0	0	4.824
8.8967	0	0	0	0	0	0	0	0	0	0	0	0	0.2297	0	0	0.459	0	0	0	0	13.554	0	8.5	0.4595	0	0	0	0	0	0	0	0	0	0	0	0	0	0	0	0	0	0	0	0	0	0.23	0	0	4.135
8.9061	0	0	0	0	0	0	0	0	0	0	0	0	0.2297	0	0	0.23	0	0	0	0	11.486	0	7.3514	0.2297	0	0	0	0	0	0	0	0	0	0	0	0	0	0	0	0	0	0	0	0	0	0	0	0	4.824
8.9155	0	0	0	0	0	0	0	0	0	0	0	0	0.2297	0	0	0.23	0	0	0	0	11.257	0	7.5811	0.4595	0	0	0	0	0	0	0	0	0	0	0	0	0	0	0	0	0	0	0	0	0	0.459	0	0	3.676
8.9248	0	0	0	0	0	0	0	0	0	0	0	0	0	0	0	0.23	0	0	0	0	8.73	0	8.9595	0.4595	0	0	0	0	0	0	0	0	0	0	0	0	0	0	0	0	0	0	0	0	0	0.23	0	0	4.135
8.9342	0	0	0	0	0	0	0	0	0	0	0	0	0	0	0	0	0	0	0	0	7.351	0	8.5	1.3784	0	0	0	0	0	0	0	0	0	0	0	0	0	0	0	0	0	0	0	0	0	0	0	0	4.595
8.9436	0	0	0	0	0	0	0	0	0	0	0	0	0	0	0	0.23	0	0	0	0	7.581	0	9.8784	1.1486	0	0	0	0	0	0	0	0	0	0	0	0	0	0	0	0	0	0	0	0	0	0	0	0	4.595
8.953	0	0	0	0	0	0	0	0	0	0	0	0	0	0	0	0.459	0	0	0	0	9.189	0	9.6486	0.9189	0	0	0	0	0	0	0	0	0	0	0	0	0	0	0	0	0	0	0	0	0	0	0	0	4.824
8.9623	0	0	0	0	0	0	0	0	0	0	0	0	0	0	0	0	0	0	0	0	9.649	0	8.2703	0.6892	0	0	0	0	0	0	0	0	0	0	0	0	0	0	0	0	0	0	0	0	0	0	0	0	4.365
8.9717	0	0	0	0	0	0	0	0	0	0	0	0	0	0	0	0	0	0	0.23	0	10.568	0	7.5811	0.9189	0	0	0	0	0	0	0	0	0	0	0	0	0	0	0	0	0	0	0	0	0	0	0	0	4.824
8.9811	0	0	0	0	0	0	0	0	0	0	0	0	0	0	0	0	0	0	0	0	9.189	0	7.1216	0.4595	0	0	0	0	0	0	0	0	0	0	0	0	0	0	0	0	0	0	0	0	0	0	0	0	4.824
8.9904	0	0	0	0	0	0	0	0	0	0	0	0	0.2297	0	0	0	0	0	0	0	9.189	0	8.7297	0	0	0	0	0	0	0	0	0	0	0	0	0	0	0	0	0	0	0	0	0	0	0	0	0	4.135
8.9998	0	0	0	0	0	0	0	0	0	0	0	0	0.2297	0	0	0	0	0	0	0	8.5	0	7.8108	0	0	0	0	0	0	0	0	0	0	0	0	0	0	0	0	0	0	0	0	0	0	0	0	0	3.676
9.0092	0	0	0	0	0	0	0	0	0	0	0	0	0.4595	0	0	0.23	0	0	0	0	6.662	0	7.8108	0	0	0	0	0	0	0	0	0	0	0	0	0	0	0	0	0	0	0	0	0	0	0	0	0	3.905
9.0186	0	0	0	0	0	0	0	0	0	0	0	0	0.4595	0	0	0.23	0	0	0	0	6.432	0	8.2703	0	0	0	0	0	0	0	0	0	0	0	0	0	0	0	0	0	0	0	0	0	0	0	0	0	3.676
9.0279	0	0	0	0	0	0	0	0	0	0	0	0	0.2297	0	0	0.459	0	0	0	0	7.122	0	7.5811	0	0	0	0	0	0	0	0	0	0	0	0	0	0	0	0	0	0	0	0	0	0	0	0	0	4.135
9.0373	0	0	0	0	0	0	0	0	0	0	0	0	0	0	0	0.919	0	0	0	0	7.122	0	8.5	0.2297	0	0	0	0	0	0	0	0	0	0	0	0	0	0	0	0	0	0	0	0	0	0	0	0	4.365
9.0467	0	0	0	0	0	0	0	0	0	0	0	0	0	0	0	0.459	0	0.2297	0	0	6.432	0	8.7297	0.2297	0	0	0	0	0	0	0	0	0	0	0	0	0	0	0	0	0	0	0	0	0	0	0	0	6.203
9.0561	0	0	0	0	0	0	0	0	0	0	0	0	0	0	0	0	0	0.2297	0	0	6.432	0	9.1892	0.2297	0	0	0	0	0	0	0	0	0	0	0	0	0	0	0	0	0	0	0	0	0	0	0	0	6.203
9.0654	0	0	0	0	0.23	0	0	0	0	0	0	0	0	0	0	0	0	0.6892	0	0	6.662	0	8.7297	0.2297	0	0	0	0	0	0	0	0	0	0	0	0	0	0	0	0	0	0	0	0	0	0	0	0	5.284
9.0748	0	0	0	0	0.23	0	0	0	0	0	0	0	0	0	0	0	0.23	1.1486	0	0	8.5	0	8.2703	0.2297	0	0	0	0	0	0	0	0	0	0	0	0	0	0	0	0	0	0	0	0	0	0	0	0	4.595
9.0842	0	0	0	0	0	0	0	0	0	0	0	0	0	0	0	0	0.23	0.6892	0	0	9.419	0	9.4189	0	0	0	0	0	0	0	0	0	0	0	0	0	0	0	0	0	0	0	0	0	0	0	0	0	3.905
9.0936	0	0	0	0	0	0	0	0	0	0	0	0	0	0	0	0	0	0.6892	0	0	9.878	0	7.8108	0.4595	0	0	0	0	0	0	0	0	0	0	0	0	0	0	0	0	0	0	0	0	0	0	0	0	4.365
9.1029	0	0	0	0	0	0	0	0	0	0	0	0	0	0	0	0	0	0.2297	0	0	9.419	0	6.8919	0.2297	0	0	0	0	0	0	0	0	0	0	0	0	0	0	0	0	0	0	0	0	0	0	0	0	4.135
9.1123	0.2297	0	0	0	0	0	0	0	0	0	0	0	0.2297	0	0	0	0	0	0	0	11.027	0	6.2027	0.2297	0	0	0	0	0	0	0	0	0	0	0	0	0	0	0	0	0	0	0	0	0	0	0	0	4.365
9.1217	0	0	0	0	0	0	0	0	0	0	0	0	0.4595	0	0	0	0	0	0	0	9.878	0	6.6622	0.2297	0	0	0	0	0	0	0	0	0	0	0	0	0	0	0	0	0	0	0	0	0	0	0	0	4.365
9.1311	0.4595	0	0	0	0	0	0	0	0	0	0	0	0.4595	0	0	0	0	0	0	0	9.649	0	7.5811	0.6892	0	0	0	0	0.23	0	0	0	0	0	0	0	0	0	0	0	0	0	0	0	0	0	0	0	4.595
9.1404	0	0	0	0	0	0	0	0	0	0	0	0	0.2297	0	0	0	0	0	0	0	10.797	0	7.8108	0.6892	0	0	0	0	0	0	0	0	0	0	0	0	0	0	0	0	0	0	0	0	0	0	0	0	4.595
9.1498	0	0	0	0	0	0	0	0	0	0	0	0	0.4595	0	0	0.23	0	0	0	0	9.189	0	8.9595	1.1486	0	0	0	0	0.23	0	0	0	0	0	0	0	0	0	0	0	0	0	0	0	0	0	0	0	5.514
9.1592	0	0	0	0	0	0	0	0	0	0	0	0	0.4595	0	0	0.459	0	0	0	0.2297	6.892	0	7.1216	1.1486	0	0	0	0	0.459	0	0	0	0	0	0	0	0	0	0	0	0	0	0	0	0	0	0	0	6.432
9.1686	0	0	0	0	0	0	0	0	0	0	0	0	0.4595	0	0	0.23	0	0	0	0	6.203	0	6.6622	0.6892	0	0	0	0	0.23	0	0	0	0	0	0	0	0	0	0	0	0	0	0	0	0	0	0	0	6.432
9.1779	0	0	0	0	0	0	0	0	0	0	0	0	0.6892	0	0	0	0	0.2297	0	0	6.203	0	5.973	0.2297	0	0	0	0	0	0	0	0	0	0	0	0	0	0	0	0	0	0	0	0	0	0	0	0	6.203
9.1873	0	0	0	0	0	0	0	0	0	0	0	0	0.4595	0	0	0	0	0.9189	0	0	6.662	0	7.3514	0.2297	0	0	0	0	0	0	0	0	0	0	0	0	0	0	0	0	0	0	0	0	0	0	0	0	7.122
9.1967	0	0	0	0	0	0	0	0	0	0	0	0	0.2297	0	0	0	0	1.3784	0	0	7.811	0	7.8108	0.2297	0	0	0	0	0	0	0	0	0	0	0	0	0	0	0	0	0	0	0	0	0	0	0	0	7.581
9.2061	0	0	0	0	0	0	0	0	0	0	0	0	0	0	0	0	0	1.3784	0	0	8.73	0	5.973	0.6892	0	0	0	0	0	0	0	0	0	0	0	0	0	0	0	0	0	0	0	0	0	0	0	0	7.122
9.2154	0	0	0	0	0.23	0	0	0	0	0	0	0	0	0	0	0	0	1.6081	0	0	8.73	0	6.8919	0.9189	0	0	0	0	0	0	0	0	0	0	0	0	0	0	0	0	0	0	0	0	0	0	0	0	7.581
9.2248	0	0	0	0	0.23	0	0	0	0	0	0	0	0	0	0	0	0	1.1486	0	0	7.811	0	7.1216	0.9189	0	0	0	0	0	0	0	0	0	0	0	0	0	0	0	0	0	0	0	0	0	0	0	0	7.811
9.2342	0	0	0	0	0.459	0	0	0	0	0	0	0	0	0	0	0	0	1.6081	0	0	8.041	0	8.2703	0.4595	0	0	0	0	0	0	0	0	0	0	0	0	0	0	0	0	0	0	0	0	0	0	0	0	7.351
9.2436	0	0	0	0	0.23	0	0	0	0	0	0	0	0	0	0	0	0	1.3784	0	0	8.041	0	8.9595	0.6892	0	0	0	0	0	0	0	0	0	0	0	0	0	0	0	0	0	0	0	0	0	0	0	0	6.892
9.2529	0	0	0	0	0.459	0	0	0	0	0	0	0	0	0.23	0	0	0	0.9189	0	0	7.122	0	10.1081	0.6892	0	0	0	0	0	0	0	0	0	0	0	0	0	0	0	0	0	0	0	0	0	0	0	0	8.5
9.2623	0	0	0	0	0.23	0	0	0	0	0	0	0	0	0.459	0	0	0	0	0	0	7.811	0	11.027	0.6892	0	0	0	0	0	0	0	0	0	0	0	0	0	0	0	0	0	0	0	0	0	0	0	0	8.27
9.2717	0	0	0	0	0.23	0	0	0	0	0	0	0	0	0.919	0	0	0	0	0	0	6.662	0	10.5676	0	0	0	0	0	0	0	0	0	0	0	0	0	0	0	0	0	0	0	0	0	0	0	0	0	8.73
9.2811	0	0	0	0	0	0	0	0	0	0	0	0	0	1.149	0	0	0	0	0	0	5.284	0	10.3378	0	0	0	0	0	0	0	0	0	0	0	0	0	0.23	0	0	0	0	0	0	0	0	0	0	0	8.959
9.2904	0.2297	0	0	0	0	0	0	0	0	0	0	0	0.2297	1.378	0	0	0	0	0	0	5.284	0	9.6486	0.2297	0	0	0	0	0	0	0	0	0	0	0	0	0	0	0	0	0	0	0	0	0	0	0	0	8.5
9.2998	0.4595	0	0	0	0	0	0	0	0	0	0	0	0.6892	1.608	0	0	0	0.2297	0	0	3.676	0	9.4189	0.2297	0	0	0	0	0	0	0	0	0	0	0	0	0.459	0	0	0	0	0	0	0	0	0	0	0	8.73
9.3092	0	0	0	0	0	0	0	0	0	0	0	0	0.6892	1.149	0	0	0	0.9189	0	0	4.365	0	9.4189	0.2297	0	0	0	0	0	0	0	0	0	0	0	0	0	0	0	0	0	0	0	0	0	0	0	0	8.5
9.3186	0	0	0	0	0	0	0	0	0	0	0	0	1.3784	1.149	0	0	0	0.9189	0.459	0	6.662	0	9.4189	0.2297	0	0	0	0	0	0	0	0	0	0	0	0	0	0	0	0	0	0	0	0	0	0	0	0	8.041
9.3279	0	0	0	0	0	0	0	0	0	0	0	0	1.6081	0.459	0	0	0	0	0.689	0	5.743	0	9.6486	0.2297	0	0	0	0	0	0	0	0	0	0	0	0	0	0	0	0	0	0	0	0	0	0	0	0	7.351
9.3373	0	0	0	0	0	0	0	0	0	0	0	0	1.8378	0	0	0	0	0.2297	0.689	0	5.054	0	11.027	0.2297	0	0	0	0	0	0	0	0	0	0	0	0	0	0	0	0	0	0	0	0	0	0	0	0	6.892
9.3467	0	0	0	0	0	0	0	0	0	0	0	0	1.6081	0	0	0	0	0.2297	0.23	0	4.595	0	12.6351	0.2297	0	0	0	0	0	0	0	0	0	0	0	0	0	0	0	0	0	0	0	0	0	0	0	0	5.514
9.3561	0	0	0	0	0	0	0	0	0	0	0	0	0.6892	0	0	0	0	0	0	0	3.676	0	10.3378	0.2297	0	0.23	0	0	0	0	0	0	0	0	0	0	0	0	0	0	0	0	0	0	0	0	0	0	5.514
9.3654	0	0	0	0	0	0	0	0	0	0	0	0	0.4595	0.23	0	0	0	0	0	0	2.527	0	10.5676	0.9189	0	0	0	0	0	0	0	0	0	0	0	0	0	0	0	0	0	0	0	0	0	0.23	0	0	5.284
9.3748	0	0	0	0	0	0	0	0	0	0	0	0	0	0.23	0	0	0	0	0	0	1.838	0	11.2568	1.3784	0	0	0	0	0	0	0	0	0	0	0	0	0	0	0	0	0	0	0	0	0	0	0	0	6.432
9.3842	0	0	0	0	0	0	0	0	0	0	0	0	0.9189	0	0	0	0	0	0.23	0	2.297	0	11.027	1.8378	0	0	0	0	0	0	0	0	0	0	0	0	0	0	0	0	0	0	0	0	0	0	0	0	5.743
9.3936	0	0	0	0	0	0	0	0	0	0	0	0	0.2297	0	0	0	0	0	0	0	2.527	0	11.4865	1.3784	0	0.23	0	0	0	0	0	0	0	0	0	0	0	0	0	0	0	0	0	0	0	0	0	0	5.973
9.4029	0	0	0	0	0.23	0	0	0	0	0	0	0	0.2297	0	0	0	0	0	0	0	3.676	0	9.8784	1.1486	0	0	0	0	0	0	0	0	0	0	0	0	0	0	0	0	0	0	0	0	0	0	0	0	6.432
9.4123	0	0	0	0	0.459	0	0	0	0	0	0	0	0	0	0	0	0	0	0	0	2.986	0	11.2568	0.2297	0	0	0	0	0	0	0	0	0	0	0	0	0	0	0	0	0	0	0	0	0	0	0	0	6.203
9.4217	0	0	0	0	0.689	0	0	0	0	0	0	0	0	0	0	0	0	0	0	0	3.676	0	11.9459	0.6892	0	0	0	0	0	0	0	0	0	0	0	0	0	0	0	0	0	0	0	0	0	0	0	0	5.743
9.4311	0	0	0	0	0.459	0	0	0	0	0	0	0	0.2297	0	0	0	0	0	0	0	2.986	0	10.7973	0.6892	0	0	0	0	0	0	0	0	0	0	0	0	0	0	0	0	0	0	0	0	0	0	0	0	5.973
9.4404	0	0	0	0	0.23	0	0	0	0	0	0	0	0.2297	0	0	0	0	0	0	0	4.365	0	10.1081	1.1486	0	0	0	0	0	0	0	0	0	0	0	0	0	0	0	0	0	0	0	0	0	0	0	0	6.432
9.4498	0	0	0	0	0.23	0	0	0	0	0	0	0	0.2297	0	0	0	0	0	0	0	2.757	0	9.6486	1.1486	0	0	0	0	0	0	0	0	0	0	0	0	0	0	0	0	0	0	0	0	0	0	0	0	6.203
9.4592	0	0	0	0	0.23	0	0	0	0	0	0	0	0.2297	0	0	0	0	0	0	0	3.446	0	11.9459	0.6892	0	0	0	0	0	0	0	0	0	0	0	0	0	0	0	0	0	0	0	0	0	0	0	0	5.514
9.4686	0	0	0	0	0	0	0	0	0	0	0	0	0.2297	0	0	0	0	0	0	0	4.135	0	10.5676	0.4595	0	0	0	0	0	0	0	0	0	0	0	0	0	0	0	0	0	0	0	0	0	0.23	0	0	5.054
9.4779	0	0	0	0	0	0	0	0	0	0	0	0	0.2297	0	0	0	0	0.6892	0	0	3.446	0	10.1081	0.4595	0	0	0	0	0	0	0	0	0	0	0	0	0	0	0	0	0	0	0	0	0	0	0	0	4.595
9.4873	0	0	0	0	0	0	0	0	0	0	0	0	0	0	0	0	0	1.1486	0	0	4.135	0	8.5	0	0	0	0	0	0	0	0	0	0	0	0	0	0	0	0	0	0	0	0	0	0	0	0	0.23	4.595
9.4967	0	0	0	0	0	0	0	0	0	0	0	0	0.2297	0	0	0	0	1.6081	0	0	5.054	0	7.3514	0.6892	0	0	0	0	0	0	0	0	0	0	0	0	0	0	0	0	0	0	0	0	0	0	0	0	4.824
9.5061	0	0	0	0	0	0	0	0	0	0	0	0	0.9189	0	0	0	0	1.1486	0	0	5.514	0	8.7297	0.9189	0	0	0	0	0	0	0	0	0	0	0	0	0	0	0	0	0	0	0	0	0	0	0	0	4.824
9.5154	0	0	0	0	0	0	0	0	0	0	0	0	0.9189	0	0	0	0	0.9189	0	0	6.203	0	9.1892	0.6892	0	0	0	0	0	0	0	0	0	0	0	0	0	0	0	0	0	0	0	0	0	0	0	0	5.054
9.5248	0	0	0	0	0	0	0.23	0	0	0	0	0	0.2297	0	0	0	0	0.4595	0	0	4.595	0	8.9595	0.9189	0	0	0	0	0	0	0	0	0	0	0	0	0	0	0	0	0	0	0	0	0	0	0	0	4.365
9.5342	0	0	0	0	0	0	0	0	0	0	0	0	0	0	0	0	0	0.6892	0	0	5.514	0	8.5	0.9189	0	0	0	0	0	0	0	0	0	0	0	0	0	0	0	0	0	0	0	0	0	0	0	0	4.365
9.5436	0	0	0	0	0	0	0	0	0	0	0	0	0.2297	0	0	0	0	1.3784	0	0	3.905	0	8.0405	0.9189	0	0	0	0	0	0	0	0	0	0	0	0	0	0	0	0	0	0	0	0	0	0	0	0	4.824
9.5529	0	0	0	0.23	0	0	0	0	0	0	0	0	0.4595	0	0	0	0	1.6081	0	0	4.135	0	6.6622	0.4595	0	0	0	0	0	0	0	0	0	0	0	0	0	0	0	0	0	0	0	0	0	0	0	0	4.824
9.5623	0	0	0	0	0	0	0	0	0	0	0	0	0.4595	0	0	0	0	1.1486	0	0	2.986	0	6.4324	0.2297	0	0	0	0	0	0	0	0	0	0	0	0	0	0	0	0	0	0	0	0	0	0	0	0	6.203
9.5717	0	0	0	0	0	0	0	0	0	0	0	0	0.2297	0	0	0	0	0.4595	0	0	4.595	0	7.5811	0	0	0	0	0	0	0	0	0	0	0	0	0	0	0	0	0	0	0	0	0	0	0	0	0	6.203
9.5811	0	0	0	0	0	0	0	0	0	0	0	0	0.2297	0	0	0	0	0.2297	0	0	3.676	0	7.3514	0	0	0	0	0	0	0	0	0	0	0	0	0	0	0	0	0	0	0	0	0	0	0	0.23	0	5.973
9.5904	0	0	0	0	0	0	0	0	0	0	0	0	1.1486	0	0	0	0	0.9189	0	0	4.595	0	8.5	0.2297	0	0	0	0	0	0	0	0	0	0	0	0	0	0	0	0	0	0	0	0	0	0	0	0	5.284
9.5998	0	0	0	0	0	0	0	0	0	0	0	0	1.8378	0	0	0	0	0.9189	0	0	3.676	0	9.6486	1.1486	0	0	0	0	0	0	0	0	0	0	0	0	0	0	0	0	0	0	0	0	0	0	0	0	4.824
9.6092	0	0	0	0	0	0	0	0	0	0	0	0	1.6081	0	0	0	0	0.9189	0	0	3.676	0	8.0405	2.0676	0	0	0	0	0	0	0	0	0	0	0	0	0	0	0	0	0	0	0	0	0	0	0	0	5.514
9.6186	0	0	0	0	0	0	0	0	0	0	0	0	1.3784	0	0	0	0	0.4595	0	0	2.986	0	8.2703	2.527	0	0	0	0	0	0	0	0	0	0	0	0	0	0	0	0	0	0	0	0	0	0	0	0	5.054
9.6279	0	0	0	0	0	0	0	0	0	0	0	0	0.9189	0	0	0	0	0.9189	0	0	5.743	0	8.9595	2.2973	0	0	0	0	0	0	0	0	0	0	0	0	0	0	0	0	0	0	0	0	0	0	0	0	5.054
9.6373	0	0	0	0	0	0	0	0	0	0	0	0	0.6892	0	0	0	0	1.1486	0	0	4.824	0	7.5811	1.1486	0	0	0	0	0	0	0	0	0	0	0	0	0	0	0	0	0	0	0	0	0	0	0	0	5.284
9.6467	0	0	0	0	0	0	0	0	0	0	0	0	0.2297	0	0	0	0	0.6892	0	0	3.676	0	5.7432	0.4595	0	0	0	0	0	0	0	0	0	0	0	0	0	0	0	0	0	0	0	0	0	0	0	0	5.514
9.6561	0	0	0	0	0	0	0	0	0	0	0	0	0.2297	0	0	0	0	0	0	0	3.216	0	3.9054	0	0	0	0	0	0	0	0	0	0	0	0	0	0	0	0	0	0	0	0	0	0	0	0.23	0	5.054
9.6654	0	0	0	0	0	0	0	0	0	0	0	0	0.2297	0	0	0	0	0.6892	0	0	2.986	0	3.9054	0.6892	0	0	0	0	0	0	0	0	0	0	0	0	0	0	0	0	0	0	0	0	0	0	0	0	5.054
9.6748	0	0	0	0	0	0	0	0	0	0	0	0	0.2297	0	0	0	0	0.9189	0	0	2.986	0	4.8243	1.3784	0	0	0	0	0	0	0	0	0	0	0	0	0	0	0	0	0	0	0	0	0	0	0	0	5.973
9.6842	0	0	0	0	0	0	0	0	0	0	0	0	0.2297	0	0	0	0	1.3784	0	0	1.838	0	6.2027	1.3784	0	0	0	0	0	0	0	0	0	0	0	0	0	0	0	0	0	0	0	0	0	0	0	0	5.743
9.6936	0	0	0	0	0	0	0	0	0	0	0	0	0.2297	0	0	0	0	1.3784	0	0	1.608	0	6.6622	0.9189	0	0	0	0	0	0	0	0	0	0	0	0	0	0	0	0	0	0	0	0	0	0	0	0	6.662
9.7029	0	0	0	0	0	0	0	0	0	0	0	0	0.4595	0.23	0	0	0	0.6892	0	0	0.919	0	5.973	1.1486	0	0	0	0	0	0	0	0	0	0	0	0	0	0	0	0	0	0	0	0	0	0	0	0	7.811
9.7123	0	0	0	0	0	0	0	0	0	0	0	0	0.4595	0.459	0	0	0	0.4595	0	0	1.378	0	5.0541	0.9189	0	0	0	0	0	0	0	0	0	0	0	0	0	0	0	0	0	0	0	0	0	0	0.459	0	6.432
9.7217	0	0	0	0	0	0	0	0	0	0	0	0	0.9189	0.23	0	0	0	0	0	0	1.378	0	3.9054	0.6892	0	0	0	0	0	0	0	0	0	0	0	0	0	0	0	0	0	0	0	0	0	0	0.23	0	6.892
9.7311	0	0	0	0	0	0	0	0	0	0	0	0	0.6892	0.23	0.23	0	0	0	0	0	4.135	0	6.8919	0.6892	0	0	0	0	0	0	0	0	0	0	0	0	0	0	0	0	0	0	0	0	0	0	0	0	6.892
9.7404	0	0	0	0	0	0	0	0	0	0	0	0	0.4595	0	0	0	0	0	0	0	3.905	0	6.6622	0.6892	0	0	0	0	0	0	0	0	0	0	0	0	0	0	0	0	0	0	0	0	0	0	0	0	5.973
9.7498	0	0	0	0	0	0	0	0	0	0	0	0	0.2297	0	0	0	0	0	0	0	4.595	0	8.7297	0.2297	0	0	0	0	0	0	0	0	0	0	0	0	0	0	0	0	0	0	0	0	0	0	0	0	5.054
9.7592	0	0	0	0	0	0	0	0	0	0	0	0	0.4595	0	0	0	0	0	0	0	2.757	0	6.8919	0.4595	0	0	0	0	0	0	0	0	0	0	0	0	0	0	0	0	0	0	0	0	0	0	0	0	5.284
9.7686	0	0	0	0	0	0	0	0	0	0	0	0	0.6892	0	0	0	0	0.2297	0	0	2.297	0	5.973	0.4595	0	0	0	0	0	0	0	0	0	0	0	0	0	0	0	0	0	0	0	0	0	0	0	0	5.054
9.7779	0	0	0	0	0	0	0	0	0	0	0	0	0.4595	0	0	0	0	0.4595	0	0	2.527	0	4.1351	0.2297	0	0	0	0	0	0	0	0	0	0	0	0	0	0	0	0	0	0	0	0	0	0	0	0	5.054
9.7873	0	0	0	0	0	0	0	0	0	0	0	0	0.2297	0	0	0	0	0.9189	0	0	1.149	0	4.1351	0.6892	0	0	0	0	0	0	0	0	0	0	0	0	0	0	0	0	0	0	0	0	0	0	0	0	3.905
9.7967	0	0	0	0	0	0	0	0	0	0	0	0	0.4595	0	0	0	0	0.4595	0	0	0.689	0	4.1351	0.9189	0	0	0	0	0	0	0	0	0	0	0	0	0	0	0	0	0	0	0	0	0	0	0	0	4.365
9.8061	0	0	0	0	0	0	0	0	0	0	0	0	0.2297	0	0	0	0	0.2297	0	0	1.378	0	4.5946	0.9189	0	0	0	0	0	0	0	0	0	0	0	0	0	0	0	0	0	0	0	0	0	0	0	0	2.986
9.8154	0	0	0	0	0	0	0	0	0	0	0	0	0.6892	0	0	0	0	0	0	0	1.378	0	5.0541	0.9189	0	0	0	0	0	0	0	0	0	0	0	0	0	0	0	0	0	0	0	0	0	0	0	0	3.446
9.8248	0	0	0	0	0	0	0	0	0	0	0	0	0.2297	0	0	0	0	0	0	0	1.608	0	5.5135	1.1486	0	0	0	0	0	0	0	0	0	0	0	0	0	0	0	0	0	0	0	0	0	0	0	0	3.216
9.8342	0	0	0	0	0	0	0	0	0	0	0	0	0.4595	0	0	0	0	0	0	0	1.838	0	2.9865	1.1486	0	0	0	0	0	0	0	0	0	0	0	0	0	0	0	0	0	0	0	0	0	0	0	0	3.446
9.8436	0	0	0	0	0	0	0	0	0	0	0	0	0	0	0	0	0	0	0	0	2.527	0	3.2162	0.9189	0	0	0.23	0	0	0	0	0	0	0	0	0	0	0	0	0	0	0	0	0	0	0	0	0	3.446
9.8529	0	0	0	0	0	0	0	0	0	0	0	0	1.1486	0	0	0	0	0	0	0	2.527	0	2.2973	1.1486	0	0	0	0	0	0	0	0	0	0	0	0	0	0	0	0	0	0	0	0	0	0	0	0	2.986
9.8623	0	0	0	0	0	0	0	0	0	0	0	0	1.3784	0	0	0.23	0	0.2297	0	0	3.905	0	1.6081	0.4595	0	0	0	0	0	0	0	0	0	0	0	0	0	0	0	0	0	0	0	0	0	0	0	0	2.068
9.8717	0	0	0	0	0.459	0	0	0	0	0	0	0	0.9189	0	0	0	0	0.2297	0	0	3.446	0	2.0676	0.4595	0	0	0	0	0	0	0	0	0	0	0	0	0	0	0	0	0	0	0	0	0	0	0	0	0.689
9.8811	0	0	0	0	0.23	0	0	0	0	0	0	0	0.4595	0	0	0	0	0	0	0	4.135	0	2.2973	0	0	0	0	0	0	0	0	0	0	0	0	0	0	0	0	0	0	0	0	0	0	0	0	0	0.689
9.8904	0	0	0	0	0.689	0	0	0	0	0	0	0	0	0	0	0	0	0	0	0	3.446	0	1.1486	0	0	0	0	0	0	0	0	0	0	0	0	0	0	0	0	0	0	0	0	0	0	0	0	0	1.149
9.8998	0	0	0	0	0.689	0	0	0	0	0	0	0	0	0.23	0	0	0	0	0	0	3.905	0	1.6081	0	0	0	0	0	0	0	0	0	0	0	0	0	0	0	0	0	0	0	0	0	0	0	0	0	0.689
9.9092	0	0	0	0	1.149	0	0	0	0	0	0	0	0	0	0	0	0	0	0	0	3.216	0	0.9189	0	0	0	0	0	0	0	0	0	0	0	0	0	0	0	0	0	0	0	0	0	0	0	0	0	0.23
9.9186	0	0	0	0	0.919	0	0	0	0	0	0	0	0	0	0	0	0	0	0	0	2.986	0	0.4595	0	0	0	0	0	0	0	0	0	0	0	0	0	0	0	0	0	0	0	0	0	0	0	0	0	0.23
9.9279	0	0	0	0	0.689	0	0	0	0	0	0	0	0	0	0	0	0	0	0	0	2.527	0	0.4595	0	0	0	0	0	0	0	0	0	0	0	0	0	0	0	0	0	0	0	0	0	0	0	0	0	0
9.9373	0	0	0	0	0.23	0	0	0	0	0	0	0	0.2297	0	0	0	0	0	0	0	4.135	0	0.4595	0	0	0	0	0	0	0	0	0	0	0	0	0	0	0	0	0	0	0	0	0	0	0	0	0	0.459
9.9467	0	0	0	0	0	0	0	0	0	0	0	0	0.4595	0	0	0	0	0	0	0	4.595	0	0	0	0	0	0	0	0	0	0	0	0	0	0	0	0	0	0	0	0	0	0	0	0	0	0	0	0.689
9.9561	0	0	0	0	0	0	0	0	0	0	0	0	0	0	0	0.23	0	0.2297	0	0	4.595	0	0	0	0	0	0	0	0	0	0	0	0	0	0	0	0	0	0	0	0	0	0	0	0	0	0	0	0.919
9.9654	0	0	0	0	0	0	0	0	0	0	0	0	0	0	0	0	0	0.4595	0	0	3.216	0	0.9189	0	0	0	0	0	0	0	0	0	0	0	0	0	0	0	0	0	0	0	0	0	0	0	0	0	0.689
9.9748	0	0	0	0	0	0	0	0	0	0	0	0	0	0	0	0	0	1.1486	0	0	3.676	0	0.9189	0	0	0	0	0	0	0	0	0	0	0.459	0	0	0	0	0	0	0	0	0	0.459	0.459	0	0	0	1.608
9.9842	0	0	0.459	0	0	0	0	0	0	0	0	0	0	0	0	0	0	1.3784	0	0	3.676	0	0.2297	0	0	0	0	0	0	0	0	0	0	0.689	0	0	0	0	0	0	0	0	0	0.23	0.23	0	0	0	2.297
9.9936	0	0	0.689	0	0	0	0	0	0	0	0	0	0	0	0	0	0	0.4595	0	0	3.676	0	0.2297	0	0	0	0	0	0	0	0	0	0	0.459	0	0	0	0	0	0	0	0	0	0	0	0	0	0	3.446
10.0029	0	0	0.23	0	0	0	0	0	0	0	0	0	0	0	0	0	0	0	0	0	2.527	0	0.2297	0	0	0	0	0	0	0	0	0	0	0.23	0	0	0	0	0	0	0	0	0	0	0	0	0	0	3.446
10.0123	0	0	0	0	0	0	0	0	0	0	0	0	0	0	0	0	0	0	0	0	2.986	0	0.2297	0	0	0	0	0	0	0	0	0	0	0	0	0	0	0	0	0	0	0	0	0	0	0	0	0	3.216
10.0217	0	0	0	0	0	0	0	0	0	0	0	0	0	0	0	0	0	0	0	0	2.297	0	0.9189	0	0	0	0	0	0	0	0	0	0	0	0	0	0	0	0	0	0	0	0	0	0	0	0	0	2.527
10.0311	0	0	0.23	0	0	0	0	0	0	0	0	0	0	0	0	0	0	0	0	0	1.838	0	0.6892	0	0	0	0	0	0	0	0	0	0	0	0	0	0	0	0	0	0	0	0	0	0	0	0	0	3.216
10.0404	0	0	0.689	0	0	0	0	0	0	0	0	0	0	0	0	0	0	0	0	0	2.297	0	0.4595	0	0	0	0	0	0	0	0	0	0	0	0	0	0	0	0	0	0	0	0	0	0	0	0	0	2.986
10.0498	0	0	0.23	0	0	0	0	0	0	0	0	0	0	0	0	0	0	0	0	0	2.757	0	0	0.2297	0	0	0	0	0	0	0	0	0	0	0	0	0	0	0	0	0	0	0	0	0	0	0	0	2.757
10.0592	0	0	0	0	0	0	0	0	0	0	0	0	0	0	0	0	0	0	0	0	2.527	0	0	0	0	0	0	0	0	0	0	0	0	0	0	0	0	0	0	0	0	0	0	0	0	0	0	0	1.149
10.0686	0	0	0	0	0	0	0	0	0	0	0	0	0	0	0	0	0	0	0	0	2.068	0	0.2297	0	0	0	0	0	0	0	0	0	0	0	0	0	0	0	0	0	0	0	0	0	0	0	0	0	0.689
10.0779	0	0	0	0	0	0	0	0	0	0	0	0	0	0	0	0.23	0	0	0	0	2.068	0	0.6892	0.2297	0	0	0	0	0	0	0	0	0	0	0	0	0	0	0	0	0	0	0	0	0	0	0	0	0.689
10.0873	0	0	0	0	0	0	0	0	0	0	0	0	0.2297	0	0	0	0	0	0	0	1.838	0	0.4595	0.2297	0	0	0	0	0	0	0	0	0	0	0	0	0	0	0	0	0	0	0	0	0	0	0	0	0.919
10.0967	0	0	0	0	0	0	0.23	0	0	0	0	0	0.4595	0	0	0	0	0	0	0	1.378	0	0.6892	0	0	0	0	0	0	0	0	0	0	0	0	0	0	0	0	0	0	0	0	0	0	0	0	0	0.689
10.1061	0	0	0	0	0	0	0	0	0	0	0	0	0.4595	0	0	0	0	0.2297	0	0	1.838	0	0.4595	0	0	0	0	0	0	0	0	0	0	0	0	0	0	0	0	0	0	0	0	0	0	0	0	0	0.459
10.1154	0	0	0	0	0	0	0	0	0	0	0	0	0.2297	0	0	0	0	0.9189	0	0	1.608	0	0.4595	0	0	0	0	0	0	0	0	0	0	0	0	0	0	0	0	0	0	0	0	0	0	0	0	0	0.919
10.1248	0	0	0	0	0	0	0	0	0	0	0	0	0	0	0	0	0	1.1486	0	0	2.068	0	0.4595	0	0	0	0	0	0	0	0	0	0	0	0	0	0	0	0	0	0	0	0	0	0	0	0	0	0.689
10.1342	0	0	0	0	0	0	0	0	0	0	0	0	0	0	0	0	0	1.3784	0	0	2.527	0	1.3784	0.2297	0	0	0	0	0	0	0	0	0	0	0	0	0	0	0	0	0	0	0	0	0	0	0	0	0.23
10.1436	0	0	0	0	0	0	0	0	0	0	0	0	0	0	0	0	0	1.6081	0	0	2.297	0	1.3784	0	0	0	0	0	0	0	0	0	0	0	0	0	0	0	0	0	0	0	0	0	0	0	0	0	0.23
10.1529	0	0	0	0	0	0	0	0	0	0	0	0	0	0	0	0	0	1.1486	0	0	3.216	0	2.2973	0	0	0	0	0	0	0	0	0	0	0	0	0	0	0	0	0	0	0	0	0	0	0	0	0	0
10.1623	0	0	0	0	0	0	0	0	0	0	0	0	0	0	0	0	0	0.4595	0	0	3.676	0	1.6081	0	0	0	0	0	0	0	0	0	0	0	0	0	0	0	0	0	0	0	0	0	0	0	0	0	0
10.1717	0	0	0	0	0	0	0	0	0	0	0	0	0.2297	0	0	0	0	0	0	0	3.676	0	1.3784	0	0	0	0	0	0	0	0	0	0	0	0	0	0	0	0	0	0	0	0	0	0	0	0	0	0
10.1811	0	0	0	0	0	0	0	0	0	0	0	0	0	0	0	0	0	0	0	0	2.986	0	0.9189	0	0	0	0	0	0	0	0	0	0	0	0	0	0	0	0	0	0	0	0	0	0	0	0	0	0
10.1904	0	0	0	0	0	0	0	0	0	0	0	0	0	0	0	0	0	0	0	0	3.216	0	0.6892	0	0	0	0	0	0	0	0	0	0	0	0	0	0	0	0	0	0	0	0	0	0	0	0	0	0
10.1998	0	0	0	0	0	0	0	0	0	0	0	0	0.2297	0	0	0	0	0	0	0	2.068	0	0	0	0	0	0	0	0	0	0	0	0	0	0	0	0	0	0	0	0	0	0	0	0	0	0	0	0
10.2092	0	0	0	0	0	0	0	0.459	0	0	0	0	0	0	0	0	0	0	0	0	1.378	0	0	0	0	0	0	0	0	0	0	0	0	0	0	0	0	0	0	0	0	0	0	0	0	0	0	0	0
10.2186	0	0	0	0	0	0	0	0.689	0	0	0	0	0	0	0	0	0	0	0	0	2.068	0	0.2297	0	0	0	0	0	0	0	0	0	0	0	0	0	0	0	0	0	0	0	0	0	0	0	0	0	0
10.2279	0	0	0	0	0	0	0	0.23	0	0	0	0	0.4595	0	0	0.23	0	0	0	0	2.527	0	0.6892	0	0	0	0	0	0	0	0	0	0	0	0	0	0	0	0	0	0	0	0	0	0	0	0	0	0
10.2373	0	0	0	0	0	0	0	0	0	0	0	0	0	0	0	0.689	0	0	0	0	3.216	0	0.6892	0	0	0	0	0	0	0	0	0	0	0	0	0	0	0	0	0	0	0	0	0	0	0	0	0	0
10.2467	0	0	0	0	0	0	0	0	0	0	0	0	0	0.459	0	0.689	0	0	0	0	2.297	0	0.2297	0	0	0	0	0	0	0	0	0	0	0	0	0	0	0	0	0	0	0	0	0	0	0	0	0	0
10.2561	0	0	0	0	0	0	0	0	0	0	0	0	0	0.919	0	0.919	0	0	0	0	3.446	0	0.4595	0	0	0	0	0	0	0	0	0	0	0	0	0	0	0	0	0	0	0	0	0	0	0	0	0	0
10.2654	0	0	0	0	0	0	0	0	0	0	0	0	0.4595	0.459	0	0.23	0	0	0	0	3.905	0	0.4595	0.2297	0	0	0	0	0	0	0	0	0	0	0	0	0	0	0	0	0	0	0	0	0	0	0	0	0
10.2748	0	0	0	0	0	0	0	0	0	0	0	0	0.6892	0.23	0	0.23	0	0	0	0	3.676	0	0.4595	0.9189	0	0	0	0	0	0	0	0	0	0	0	0	0	0	0	0	0	0	0	0	0	0	0	0	0
10.2842	0	0	0	0	0	0	0	0	0	0	0	0	0	0	0	0	0	0	0	0	3.676	0	0.2297	1.1486	0	0	0	0	0	0	0	0	0	0	0	0	0	0	0	0	0	0	0	0	0	0	0	0	0
10.2935	0	0	0	0	0	0	0	0	0	0	0	0	0	0	0	0.459	0	0.2297	0	0	2.986	0	0	0.9189	0	0	0	0	0	0	0	0	0	0	0	0	0	0	0	0	0	0	0	0	0	0	0	0	0
10.3029	0	0	0	0	0	0	0	0	0	0	0	0	0	0	0	0.689	0	0	0	0	2.527	0	0	1.3784	0	0	0	0	0	0	0	0	0	0	0	0	0	0	0	0	0	0	0	0	0	0	0	0	0
10.3123	0	0	0	0	0	0	0	0	0	0	0	0	0	0	0	0.459	0	0	0	0	2.757	0	0	1.1486	0	0	0	0	0	0	0	0	0	0	0	0	0	0	0	0	0	0	0	0	0	0	0	0	0
10.3217	0	0	0	0	0	0	0	0	0	0	0	0	0	0	0	0.23	0	0	0	0	2.297	0	0.2297	0	0	0	0	0	0	0	0	0	0	0	0	0	0	0	0	0	0	0	0	0	0	0	0	0	0
10.331	0	0	0	0	0	0	0	0	0	0	0	0	0.2297	0	0	0	0	0.6892	0	0	2.068	0	0	0	0	0	0	0	0	0	0	0	0	0	0	0	0	0	0	0	0	0	0	0	0	0	0	0	0
10.3404	0	0	0	0	0	0	0	0	0	0	0	0	0.4595	0	0	0	0	0.9189	0	0	1.838	0	0.2297	0	0	0	0	0	0	0	0	0	0	0	0	0	0	0	0	0	0	0	0	0	0	0	0	0	0
10.3498	0	0	0	0	0	0	0	0	0	0	0	0	0.4595	0	0	0.23	0	0.2297	0	0	1.608	0	0	0	0	0	0	0	0	0	0	0	0	0	0	0	0	0	0	0	0	0	0	0	0	0	0	0	0
10.3592	0	0	0	0	0	0	0	0	0	0	0	0	0	0	0	0.459	0	0	0	0	1.608	0	0	0	0	0	0	0	0	0	0	0	0	0	0	0	0	0	0	0	0	0	0	0	0	0	0	0	0
10.3685	0	0	0	0	0	0	0	0	0	0	0	0	0	0	0	0.23	0	0	0	0	1.378	0	0	0	0	0	0	0	0	0	0	0	0	0	0	0	0	0	0	0	0	0	0	0	0	0	0	0	0
10.3779	0	0	0	0	0.23	0	0	0	0	0	0	0	0	0	0	0	0	0	0	0	2.297	0	0	0	0	0	0	0	0	0	0	0	0	0	0	0	0	0	0	0	0	0	0	0	0	0	0	0	0
10.3873	0	0	0	0	0.23	0	0	0	0	0	0	0	0	0	0	0	0	0	0	0	2.986	0	0	0	0	0	0	0	0	0	0	0	0	0	0	0	0	0	0	0	0	0	0	0	0	0	0	0	0
10.3967	0	0	0	0	0.689	0	0	0	0	0	0	0	0	0	0	0	0	0	0	0	1.838	0	0	0	0	0	0	0	0	0	0	0	0	0	0	0	0	0	0	0	0	0	0	0	0	0	0	0	0
10.406	0	0	0	0	0.689	0	0	0	0	0	0	0	0	0.459	0	0	0	0	0	0	2.527	0	0	0	0	0	0	0	0	0	0	0	0	0	0	0	0	0	0	0	0	0	0	0	0	0	0	0	0
10.4154	0	0	0	0	0.459	0	0	0	0	0	0	0	0	0.459	0	0	0	0	0	0	2.757	0	0.6892	0.2297	0	0	0	0	0	0	0	0	0	0	0	0	0	0	0	0	0	0	0	0	0	0	0	0	0
10.4248	0	0	0	0	0.23	0	0	0	0	0	0	0	0.2297	0.459	0	0	0	0	0	0	2.527	0	0.6892	0.2297	0	0	0	0	0	0	0	0	0	0	0	0	0	0	0	0	0	0	0	0	0	0	0	0	0.459
10.4342	0	0	0	0	0	0	0	0	0	0	0	0	0.2297	0	0	0	0	0	0	0	2.986	0	0.4595	0	0	0	0	0	0	0	0	0	0	0	0	0	0	0	0	0	0	0	0	0	0	0	0	0	0.689
10.4435	0	0	0	0	0	0	0	0	0	0	0	0	0	0	0	0	0	0	0	0	1.838	0	0	0	0	0	0	0	0	0	0	0	0	0	0	0	0	0	0	0	0	0	0	0	0	0	0	0	2.068
10.4529	0	0	0	0	0	0	0	0	0	0	0	0	0	0	0	0	0	0	0	0	0.919	0	0.4595	0.4595	0	0	0	0	0	0	0	0	0	0	0	0	0	0	0	0	0	0	0	0	0	0	0	0	2.527
10.4623	0	0	0	0	0	0	0	0	0	0	0	0	0.4595	0	0	0	0	0	0	0	0.689	0	0.2297	0.4595	0	0	0	0	0	0	0	0	0	0	0	0	0	0	0	0	0	0	0	0	0	0	0	0	2.297
10.4717	0	0	0	0	0	0	0	0	0	0	0	0	0.6892	0	0	0	0	0	0	0	0.459	0	0	0.4595	0	0	0	0	0	0	0	0	0	0	0	0	0	0	0	0	0	0	0	0	0	0	0	0	2.297
10.481	0	0	0	0	0	0	0	0	0	0	0	0	0.2297	0	0	0	0	0	0	0	1.149	0	0	0.2297	0	0	0	0	0	0	0	0	0	0	0	0	0	0	0	0	0	0	0	0	0	0	0	0	2.068
10.4904	0	0	0	0	0	0	0	0	0	0	0	0	0	0	0	0	0	0	0	0	0.919	0	0	0	0	0	0	0	0	0	0	0	0	0	0	0	0	0	0	0	0	0	0	0	0	0	0	0	2.297
10.4998	0	0	0	0	0	0	0	0	0	0	0	0	0	0	0	0	0	0	0	0	1.608	0	0	0	0	0	0	0	0	0	0	0	0	0	0	0	0	0	0	0	0	0	0	0	0	0	0	0	2.068
10.5092	0	0	0	0	0	0	0	0	0	0	0	0	0	0	0	0	0	0	0	0	2.297	0	0	0.4595	0	0	0	0	0	0	0	0	0	0	0	0	0	0	0	0	0	0	0	0	0	0	0	0	2.068
10.5185	0	0	0	0	0	0	0	0	0	0	0	0	0	0	0	0	0	0	0	0	2.527	0	0	0.6892	0	0	0	0	0	0	0	0	0	0	0	0	0	0	0	0	0	0	0	0	0	0	0	0	1.838
10.5279	0	0	0	0	0	0	0	0	0	0	0	0	0.4595	0	0	0	0	0	0	0	2.527	0	0	0.6892	0	0	0	0	0	0	0	0	0	0	0	0	0	0	0	0	0	0	0	0	0	0	0	0	2.068
10.5373	0	0	0	0	0	0	0	0	0	0	0	0	0.9189	0	0	0	0	0	0	0	2.757	0	0	0.2297	0	0	0	0	0	0	0	0	0	0	0	0	0	0	0	0	0	0	0	0	0	0	0	0	0.919
10.5467	0	0	0	0	0	0	0	0	0	0	0	0	0.2297	0.23	0	0	0	0	0	0	2.297	0	0	0	0	0	0	0	0	0	0	0	0	0	0	0	0	0	0	0	0	0	0	0	0	0	0	0	1.378
10.556	0	0	0	0	0	0	0	0	0	0	0	0	0.2297	1.149	0	0	0	0	0	0	1.608	0	0	0	0	0	0	0	0	0	0	0	0	0	0	0	0	0	0	0	0	0	0	0	0	0	0	0	1.608
10.5654	0	0	0	0	0	0	0.23	0	0	0	0	0	0	1.608	0	0	0	0	0	0	0.689	0	0	0	0	0	0	0	0	0	0	0	0	0	0	0	0	0	0	0	0	0	0	0	0	0	0	0	1.608
10.5748	0	0	0	0	0	0	0.23	0	0	0	0	0	0	1.378	0	0	0	0	0	0	0.459	0	0	0	0	0	0	0	0	0	0	0	0	0	0	0	0	0	0	0	0	0	0	0	0	0	0	0	1.378
10.5842	0	0	0	0	0	0	0	0	0	0	0	0	0	1.838	0	0	0	0	0	0	1.149	0	0.4595	0	0	0	0	0	0	0	0	0	0	0	0	0	0	0	0	0	0	0	0	0	0	0	0	0	1.838
10.5935	0	0	0	0	0	0	0	0	0	0	0	0	0.2297	1.149	0	0	0	0.2297	0	0	0.459	0	0.4595	0	0	0	0	0	0	0	0	0	0	0	0	0	0	0	0	0	0	0	0	0	0	0	0	0	1.378
10.6029	0	0	0	0	0	0	0	0	0	0	0	0	0.2297	0.23	0	0	0	0.9189	0	0	0	0	1.1486	0.4595	0	0	0	0	0	0	0	0	0	0	0	0	0	0	0	0	0	0	0	0	0	0	0	0	2.297
10.6123	0	0	0	0	0	0	0	0	0	0	0	0	0	0	0	0	0	0.9189	0	0	0.459	0	2.0676	0.4595	0	0	0	0	0	0	0	0	0	0	0	0	0	0	0	0	0	0	0	0	0	0	0	0	3.905
10.6217	0	0	0	0	0	0	0	0	0	0	0	0	0	0	0	0	0	0.6892	0	0	0.689	0	2.2973	0	0	0	0	0	0	0	0	0	0	0	0	0	0	0	0	0	0	0	0	0	0	0	0	0	4.135
10.631	0	0	0	0	0	0	0	0	0	0	0	0	0	0	0	0	0	0	0	0	1.149	0	3.6757	0	0	0	0	0	0	0	0	0	0	0	0	0	0	0	0	0	0	0	0	0	0	0	0	0	5.514
10.6404	0	0	0	0	0	0	0	0	0	0	0	0	0	0	0	0	0	0	0	0	0.23	0	3.4459	0.4595	0	0	0	0	0	0	0	0	0	0	0	0	0	0	0	0	0	0	0	0	0	0	0	0	5.514
10.6498	0	0	0	0	0	0	0	0	0	0	0	0	0.2297	0	0.23	0	0	0	0	0	0.459	0	3.6757	0.4595	0	0	0	0	0	0	0	0	0	0	0	0	0	0	0	0	0	0	0	0	0	0	0	0	4.135
10.6592	0	0	0	0	0	0	0	0	0	0	0	0	0.4595	0	0	0	0.23	0	0	0	0.459	0	3.6757	0.2297	0	0	0	0	0	0	0	0	0	0	0	0	0	0	0	0	0	0	0	0	0	0	0	0	3.216
10.6685	0	0	0	0	0	0	0	0	0	0	0	0	0.2297	0	0	0	0	0	0	0	0.23	0	5.5135	0.9189	0	0	0	0	0	0	0	0	0	0	0	0	0	0	0	0	0	0	0	0	0	0	0	0	3.446
10.6779	0	0	0	0	0.23	0	0	0	0	0	0	0	0.6892	0	0	0	0	0	0	0	0.459	0	4.5946	0.9189	0	0	0	0	0	0	0	0	0	0	0	0	0	0	0	0	0	0	0	0	0	0	0	0	2.757
10.6873	0	0	0	0	0.23	0	0	0	0	0	0	0	0.4595	0	0	0	0	0	0	0	0.459	0	5.0541	0.2297	0	0	0	0	0	0	0	0	0	0	0	0	0	0	0	0	0	0	0	0	0	0	0	0	2.527
10.6967	0	0	0	0	0.689	0	0	0	0	0	0	0	0	0	0	0	0	0	0	0	0	0	4.8243	0.2297	0	0	0	0	0	0	0	0	0	0	0	0	0	0	0	0	0	0	0	0	0	0	0	0	2.297
10.706	0	0	0	0	0.459	0	0	0	0	0	0	0	0.2297	0	0	0	0	0	0	0	0.459	0	5.0541	0	0	0	0	0	0	0	0	0	0	0	0	0	0	0	0	0	0	0	0	0	0	0	0	0	1.608
10.7154	0	0	0	0	0.689	0	0	0	0	0	0	0	0.2297	0	0	0	0	0	0	0	1.378	0	4.1351	0	0	0	0	0	0	0	0	0	0	0	0	0	0	0	0	0	0	0	0	0	0	0	0	0	1.608
10.7248	0	0	0	0	0.919	0	0	0	0	0	0	0	0.2297	0	0	0	0	0	0	0	1.149	0	3.9054	0	0	0	0	0	0	0	0	0	0	0	0	0	0	0	0	0	0	0	0	0	0	0	0	0	2.297
10.7342	0	0	0	0	0.919	0	0	0	0	0	0	0	0	0	0	0	0	0.2297	0	0	2.297	0	3.4459	0	0	0	0	0	0	0	0	0	0	0	0	0	0	0	0	0	0	0	0	0	0	0	0	0	2.527
10.7435	0	0	0	0	0.459	0	0	0	0	0	0	0	0.2297	0.23	0	0	0	0.4595	0	0	2.297	0	2.9865	0	0	0	0	0	0	0	0	0	0	0	0	0	0	0	0	0	0	0	0	0	0	0	0	0	2.068
10.7529	0	0	0	0	0.459	0	0.23	0	0	0	0	0	0.2297	0.919	0	0	0	0.2297	0	0	0.919	0	1.1486	0	0	0	0	0	0	0	0	0	0	0	0	0	0	0	0	0	0	0	0	0	0	0	0	0	2.527
10.7623	0	0	0	0	0.23	0	0.23	0	0	0	0	0	0.2297	0.919	0	0	0	0.2297	0	0	1.608	0	1.8378	0	0	0	0	0	0	0	0	0	0	0	0	0	0	0	0	0	0	0	0	0	0	0	0	0	3.676
10.7717	0	0	0	0	0	0	0.23	0	0	0	0	0	0.2297	0.23	0	0	0	0	0	0	3.446	0	2.0676	0.2297	0	0	0	0	0	0	0	0	0	0	0	0	0	0	0	0	0	0	0	0	0	0	0	0	4.365
10.781	0	0	0	0	0	0	0	0	0	0	0	0	0.6892	0	0	0	0	0	0	0	4.824	0	2.2973	0	0	0	0	0	0	0	0	0	0	0	0	0	0	0	0	0	0	0	0	0	0	0	0	0	3.905
10.7904	0	0	0	0	0	0	0	0	0	0	0	0	0.4595	0	0	0	0	0.2297	0	0	4.595	0	2.7568	0.2297	0	0	0	0	0	0	0	0	0	0	0	0	0	0	0	0	0	0	0	0	0	0	0	0	3.676
10.7998	0	0	0	0	0	0	0	0	0	0	0	0	0.6892	0.23	0	0	0	0.6892	0	0	3.676	0	3.4459	0	0	0	0	0	0	0	0	0	0	0	0	0	0	0	0	0	0	0	0	0	0	0	0	0	4.135
10.8092	0	0	0	0	0	0	0	0	0	0	0	0	0.9189	0	0	0	0	1.1486	0	0	3.676	0	3.2162	0	0	0	0	0	0	0	0	0	0	0	0	0	0	0	0	0	0	0	0	0	0	0.23	0	0	3.676
10.8185	0	0	0	0	0	0	0	0	0	0	0	0	0.6892	0	0	0	0.23	0.9189	0	0	3.446	0	3.4459	0	0	0	0	0	0	0	0	0	0	0	0	0	0	0	0	0	0	0	0	0	0	0.23	0	0	3.905
10.8279	0	0	0	0	0	0	0	0	0	0	0	0	0.9189	0	0	0	1.149	0	0	0.2297	3.216	0	1.6081	0	0	0	0	0	0	0	0	0	0	0	0	0	0	0	0	0	0	0	0	0	0	0	0	0	3.676
10.8373	0	0	0	0	0	0	0	0	0	0	0	0	1.1486	0	0	0	1.149	1.1486	0	0	2.527	0	1.8378	0	0	0	0	0	0	0	0	0	0	0	0	0	0	0	0	0	0	0	0	0	0	0	0	0	3.446
10.8467	0	0	0	0	0	0	0	0	0	0	0	0	1.6081	0	0	0	1.149	0.9189	0	0	2.297	0	2.9865	0	0	0	0	0	0	0	0	0	0	0	0	0	0	0	0	0	0	0	0	0	0	0	0	0	3.216
10.856	0	0	0	0	0	0	0	0	0	0	0	0	1.8378	0	0	0	0.23	0.9189	0	0	2.527	0	2.9865	0	0	0	0	0	0	0	0	0	0	0	0	0	0	0	0	0	0	0	0	0	0	0	0	0	3.216
10.8654	0	0	0	0	0	0	0	0	0	0	0	0	1.6081	0	0	0	0.459	0.4595	0	0	2.757	0	2.527	0.2297	0	0	0	0	0	0	0	0	0	0	0	0	0	0	0	0	0	0	0	0	0	0.23	0	0	3.216
10.8748	0	0	0	0	0	0	0	0	0	0	0	0	1.3784	0	0	0	0.459	0	0	0	3.676	0	3.4459	0.6892	0	0	0	0	0	0	0	0	0	0	0	0	0	0	0	0	0	0	0	0	0	0.23	0	0	3.216
10.8842	0	0	0	0	0	0	0	0	0	0	0	0	0.9189	0	0	0	0.23	0	0	0	4.135	0	4.8243	0	0	0	0	0	0	0	0	0	0	0	0	0	0	0	0	0	0	0	0	0	0	0	0	0	3.676
10.8935	0	0	0	0	0	0	0	0	0	0	0	0	0.2297	0	0	0	0	0	0	0	3.905	0	3.9054	0	0	0	0	0	0	0	0	0	0	0	0	0	0	0	0	0	0	0	0	0	0	0	0	0	3.446
10.9029	0	0	0	0	0	0	0	0	0	0	0	0	0	0	0.459	0	0	0	0	0	3.446	0	4.3649	0	0	0	0	0	0	0	0	0	0	0	0	0	0	0	0	0	0	0	0	0	0	0.23	0	0	3.216
10.9123	0	0	0	0	0	0	0	0	0	0	0	0	0	0	0.459	0	0	0	0	0	2.986	0	4.3649	0	0	0	0	0	0	0	0	0	0	0	0	0	0	0	0	0	0	0	0	0	0	0.23	0	0	2.757
10.9217	0	0	0	0	0	0	0	0	0	0	0	0	0	0	0	0	0.23	0	0	0	4.365	0	4.3649	0.2297	0	0	0	0	0	0	0	0	0	0	0	0	0	0	0	0	0	0	0	0	0	0.23	0	0	2.757
10.931	0	0	0	0	0	0	0	0	0	0	0	0	0	0	0	0	0.23	0	0	0	4.135	0	3.9054	0.4595	0	0	0	0	0	0	0	0	0	0	0	0	0	0	0	0	0	0	0	0	0	0	0	0	2.527
10.9404	0	0	0	0	0	0	0	0	0	0	0	0	0	0	0	0	0.459	0	0	0	5.284	0	3.2162	0.2297	0	0	0	0	0	0	0	0	0	0	0	0	0	0	0	0	0	0	0	0	0	0	0	0	2.527
10.9498	0	0	0	0	0	0	0	0	0	0	0	0	0	0	0	0	0.919	0	0	0	5.284	0	2.0676	0	0	0	0	0	0	0	0	0	0	0	0	0	0	0	0	0	0	0	0	0	0	0	0	0	2.527
10.9592	0	0	0	0	0	0	0	0	0	0	0	0	0.2297	0	0	0	1.378	0	0	0	4.135	0	3.2162	0.2297	0	0	0	0	0	0	0	0	0	0	0	0	0	0	0	0	0	0	0	0	0	0	0	0	2.068
10.9685	0	0	0	0	0	0	0	0	0	0	0	0	0	0	0	0	1.378	0	0	0	5.514	0	2.527	0.2297	0	0	0	0	0	0	0	0	0	0	0	0	0	0	0	0	0	0	0	0	0	0	0	0	1.608
10.9779	0	0	0	0	0	0	0	0	0	0	0	0	0	0	0	0	0.919	0	0	0	5.743	0	3.6757	0	0	0	0	0	0	0	0	0	0	0	0	0	0	0	0	0	0	0	0.23	0	0	0	0	0	0.919
10.9873	0	0	0	0	0	0	0	0	0	0	0	0	0	0	0.23	0	0.23	0	0	0	5.743	0	3.6757	0	0	0	0	0	0	0	0	0	0	0	0	0	0	0	0	0	0	0	0	0	0	0	0	0	0.23
10.9967	0	0	0	0	0	0	0	0	0	0	0	0	0	0	0	0	0	0	0	0	6.203	0	2.7568	0.2297	0	0	0	0	0	0	0	0	0	0	0	0	0	0	0	0	0	0	0	0	0	0	0	0	0
11.006	0	0	0	0	0	0	0	0	0	0	0	0	0.4595	0	0	0	0	0	0	0	6.203	0	3.4459	0	0	0	0	0	0	0	0	0	0	0	0	0	0	0	0	0	0	0	0	0	0	0	0	0	0
11.0154	0	0	0	0	0	0	0	0	0	0	0	0	0.4595	0	0	0	0.23	0	0	0	6.432	0	3.4459	0	0	0	0	0	0	0	0	0	0	0	0	0	0	0	0	0	0	0	0	0	0	0	0	0	0
11.0248	0	0	0	0	0	0	0	0	0	0	0	0	0	0	0	0	0.23	0	0	0	5.054	0	2.7568	0	0	0	0	0	0	0	0	0	0	0	0	0	0	0	0	0	0	0	0	0	0	0	0	0	0
11.0342	0	0	0	0	0	0	0	0	0	0	0	0	0	0	0	0	0.459	0	0	0	4.824	0	1.6081	0	0	0	0	0	0	0	0	0	0	0	0	0	0	0	0	0	0	0	0	0	0	0	0	0	0
11.0435	0	0	0	0	0	0	0	0	0	0	0	0	0	0	0	0	0.919	0	0	0	4.824	0	1.3784	0	0	0	0	0	0	0	0	0	0	0	0	0	0	0	0	0	0	0	0	0	0	0	0	0	0
11.0529	0	0	0	0	0	0	0	0	0	0	0	0	0.2297	0	0	0	0.459	0	0	0	4.135	0	2.2973	0	0	0	0	0	0	0	0	0	0	0	0	0	0	0	0	0	0	0	0	0	0	0	0	0	0
11.0623	0	0	0	0	0	0	0	0	0.2297	0	0	0	1.1486	0	0	0	0.459	0	0	0	3.905	0	1.6081	0.4595	0	0	0	0	0	0	0	0	0	0	0	0	0	0	0	0	0	0	0	0	0	0	0	0	0
11.0717	0	0	0	0	0	0	0	0	0.4595	0	0	0	1.1486	0	0	0	0.689	0	0	0	2.297	0	1.8378	1.1486	0	0	0	0	0	0	0	0	0	0	0	0	0	0	0	0	0	0	0	0	0	0	0	0	0
11.081	0	0	0	0	0	0	0	0	0.6892	0	0	0	0.6892	0	0	0	0.459	0	0	0.2297	2.297	0	2.2973	0.6892	0	0	0	0	0	0	0	0	0	0	0	0	0	0	0	0	0	0	0	0	0	0	0	0	0
11.0904	0	0	0	0	0	0	0	0	0	0	0	0	1.3784	0	0	0	1.838	0	0	0.2297	3.216	0	2.7568	0	0	0	0	0	0	0	0	0	0	0	0	0	0	0	0	0	0	0	0	0	0	0	0	0	0
11.0998	0	0	0	0	0	0	0	0	0	0	0	0	1.1486	0	0	0	2.527	0	0	0	2.527	0	2.9865	0	0	0	0	0	0	0	0	0	0	0	0	0	0	0	0	0	0	0	0	0	0	0	0	0	0.23
11.1092	0	0	0	0.23	0	0	0	0	0	0	0	0	1.1486	0	0	0	2.527	0	0	0	2.068	0	3.4459	0	0	0	0	0	0	0	0	0	0	0	0	0	0	0	0	0	0	0	0	0	0	0	0	0	0
11.1185	0	0	0	0.23	0	0	0	0	0	0	0	0	0.6892	0	0	0	2.527	0	0	0	0.919	0	2.0676	0.9189	0	0	0	0	0	0	0	0	0	0	0	0	0	0	0	0	0	0	0	0	0	0	0	0	0
11.1279	0	0	0	0.23	0	0	0	0	0	0	0	0	1.1486	0	0	0	1.838	0	0	0	0.919	0	0.9189	0.6892	0	0	0	0	0	0	0	0	0	0	0	0	0	0	0	0	0	0	0	0	0	0	0	0	0
11.1373	0	0	0	0	0	0	0	0	0	0	0	0	0.2297	0	0	0	2.527	0	0	0	1.608	0	0.6892	0.9189	0	0	0	0	0	0	0	0	0	0	0	0	0	0	0	0	0	0	0	0	0	0.459	0	0	0
11.1467	0	0	0	0	0	0	0	0	0	0	0	0	0.6892	0	0	0	2.068	0	0	0	2.297	0	1.1486	0.4595	0	0	0	0	0.23	0	0	0	0	0	0	0	0	0	0	0	0	0	0	0	0	0.459	0	0	0.459
11.156	0	0	0	0	0	0	0	0	0	0	0	0	1.1486	0	0	0	2.068	0	0	0	2.068	0	1.6081	0.2297	0	0	0	0	0.459	0	0	0	0	0	0	0	0	0	0	0	0	0	0	0	0	0	0	0	0.23
11.1654	0	0	0	0	0	0	0	0	0	0	0	0	2.2973	0	0	0	1.838	0	0	0	2.527	0	1.1486	0	0	0	0	0	0.23	0	0	0	0	0	0	0	0	0	0	0	0	0	0	0	0	0	0	0	1.149
11.1748	0	0	0	0	0	0	0	0	0	0	0	0	1.8378	0	0	0	1.378	0	0	0	3.446	0	0.9189	0	0	0	0	0	0	0	0	0	0	0	0	0	0	0	0	0	0	0	0	0	0	0	0	0	1.378
11.1842	0	0	0	0	0	0	0	0	0	0	0	0	1.3784	0	0	0	1.608	0	0	0	3.446	0	2.0676	0.2297	0	0	0	0	0	0	0	0	0	0	0	0	0	0	0	0	0	0	0	0	0	0	0	0	1.378
11.1935	0	0	0	0	0.459	0	0	0	0	0	0	0	1.3784	0	0	0	1.149	0	0	0	2.986	0	2.7568	0	0	0	0	0	0	0	0	0	0	0	0	0	0	0	0	0	0	0	0	0	0	0	0	0	1.378
11.2029	0	0	0	0.23	0.689	0	0	0	0	0	0	0	1.8378	0	0	0	1.149	0	0	0	3.216	0	2.2973	0.2297	0	0	0	0	0	0	0	0	0	0	0	0	0	0	0	0	0	0	0	0	0	0	0	0	1.149
11.2123	0	0	0	0.23	0.689	0	0	0	0	0	0	0	2.0676	0	0	0	0.689	0.9189	0	0	2.297	0	0.6892	0.2297	0	0	0	0	0	0	0	0	0	0	0	0	0	0	0	0	0	0	0	0	0	0	0	0	1.838
11.2217	0	0	0	0.459	0.689	0	0	0	0	0	0	0	2.0676	0	0.23	0	0.459	0.9189	0	0	1.838	0	2.7568	0	0	0	0	0	0	0	0	0	0	0	0	0	0	0	0	0	0	0	0	0	0	0	0	0	2.297
11.231	0	0	0	0.459	0.23	0	0	0	0	0	0	0	1.8378	0	0.23	0	0.23	1.1486	0	0	1.378	0	4.8243	0.6892	0	0	0	0	0	0	0	0	0	0	0	0	0	0	0	0	0	0	0	0	0	0	0	0	2.527
11.2404	0	0	0	0.459	0	0	0	0	0	0	0	0	0.6892	0	0.459	0	0.459	0.2297	0	0	2.068	0	5.973	1.1486	0	0	0	0	0	0	0	0	0	0	0	0	0	0	0	0	0	0	0	0	0	0	0	0	2.986
11.2498	0	0	0	0.23	0	0	0	0	0	0	0	0	0	0	0.23	0	0.919	0	0	0	3.676	0	5.5135	0.4595	0	0	0	0	0	0	0	0	0	0	0	0	0	0	0	0	0	0	0	0	0	0	0	0	2.527
11.2592	0	0	0	0	0	0	0	0	0	0	0	0	0	0	0.23	0	0.919	0	0	0	4.824	0	4.3649	0	0	0	0	0	0	0	0	0	0	0	0	0	0	0	0	0	0	0	0	0	0	0	0	0	3.216
11.2685	0	0	0	0	0	0	0	0	0	0	0	0	0.9189	0	0	0	1.149	0	0	0	4.824	0	3.9054	0.2297	0	0	0	0	0	0	0	0	0	0	0	0	0	0	0	0	0	0	0	0	0	0	0.23	0	3.216
11.2779	0	0	0	0	0	0	0	0	0	0	0	0	0.4595	0	0	0	1.378	0.2297	0	0	4.365	0	1.6081	0.6892	0	0	0	0	0	0	0	0	0	0	0	0	0	0	0	0	0	0	0	0	0	0	0.23	0	3.216
11.2873	0	0	0	0.23	0	0	0	0	0	0	0	0	0.4595	0	0	0	1.149	0.2297	0	0	3.676	0	0.4595	0.6892	0	0	0	0	0	0	0	0	0	0	0	0	0	0	0	0	0	0	0	0	0	0	0	0	2.986
11.2967	0	0	0	0	0	0	0	0	0	0	0	0	1.3784	0	0	0	0.919	0.4595	0	0	3.216	0	0.4595	0.4595	0	0	0	0	0	0	0	0	0	0	0	0	0	0	0	0	0	0	0	0	0	0	0	0	2.068
11.306	0	0	0	0	0	0	0	0	0	0	0	0	2.7568	0	0	0	0.919	0.2297	0	0	2.527	0	0.6892	0.2297	0	0	0	0	0	0	0	0	0	0	0	0	0	0	0	0	0	0	0	0	0	0	0	0	2.297
11.3154	0	0	0	0	0	0	0	0	0	0	0	0	3.4459	0	0	0	0.689	0	0	0	2.297	0	0.9189	0.2297	0	0	0	0	0	0	0	0	0	0	0	0	0	0	0	0	0	0	0	0	0	0	0	0	2.297
11.3248	0	0	0	0	0	0	0	0	0	0	0	0	4.1351	0	0	0	1.149	0	0	0	2.527	0	0.6892	0	0	0	0	0	0	0	0	0	0	0	0	0	0	0	0	0	0	0	0	0	0	0	0	0	2.297
11.3342	0	0	0	0	0	0	0	0	0	0	0	0	3.6757	0	0	0	0.919	0	0	0	1.149	0	1.8378	0.2297	0	0	0	0	0	0	0	0	0	0	0	0	0	0	0	0	0	0	0	0	0	0	0	0	2.986
11.3435	0	0	0	0	0	0	0	0	0	0	0	0	3.6757	0	0	0	0.919	0	0	0	1.838	0	2.2973	0.2297	0	0	0	0	0	0	0	0	0	0	0	0	0	0	0	0	0	0	0	0	0	0	0	0	2.757
11.3529	0	0	0	0	0	0	0	0	0	0	0	0	3.9054	0	0	0	1.149	0	0	0	1.838	0	1.6081	0.2297	0	0	0	0	0	0	0	0	0	0	0	0	0	0	0	0	0	0	0	0	0	0	0	0	2.986
11.3623	0	0	0	0	0	0	0	0	0	0	0	0	5.5135	0	0	0	0.689	0	0	0	2.297	0	1.6081	0.6892	0	0	0	0	0	0	0	0	0	0	0	0	0	0	0	0	0	0	0	0	0	0	0	0	2.986
11.3717	0	0	0	0	0	0	0	0	0	0	0	0	5.5135	0	0	0	0.689	0	0	0	2.068	0	1.3784	0.4595	0	0	0	0	0	0	0	0	0	0	0	0	0	0	0	0	0	0	0	0	0	0	0	0	2.757
11.381	0	0	0	0	0	0	0	0	0	0	0	0	4.5946	0	0	0	0.459	0	0	0	1.378	0	1.8378	0.4595	0	0	0	0	0	0	0	0	0	0	0	0	0	0	0	0	0	0	0	0	0	0	0	0	2.527
11.3904	0	0	0	0	0	0	0	0	0	0	0	0	3.6757	0	0	0	0.23	0	0	0	1.838	0	2.0676	0.6892	0	0	0	0	0	0	0	0	0	0	0	0	0	0	0	0	0	0	0	0	0	0	0	0	1.838
11.3998	0	0	0	0	0	0	0	0	0	0	0	0	2.7568	0	0	0	0	0	0	0	1.608	0	2.0676	0.6892	0	0	0	0	0	0	0	0	0	0	0	0	0	0	0	0	0	0	0	0	0	0	0	0	1.608
11.4092	0	0	0	0	0	0	0	0	0	0	0	0	2.7568	0	0	0	0	0	0	0	2.297	0	1.3784	0.2297	0	0	0	0	0	0	0	0	0	0	0	0	0	0	0	0	0	0	0	0	0	0	0	0	2.527
11.4185	0	0	0	0	0	0	0	0	0	0	0	0	4.3649	0	0	0	0	0	0	0	1.378	0	1.3784	0.4595	0	0	0	0	0	0	0	0	0	0	0	0	0	0	0	0	0	0	0	0	0	0	0	0	2.527
11.4279	0	0	0	0	0	0	0	0	0	0	0	0	5.5135	0	0.23	0	0	0	0	0	1.838	0	2.0676	0.2297	0	0	0	0	0	0	0	0	0	0	0	0	0	0	0	0	0	0	0	0	0	0	0	0	2.757
11.4373	0	0	0	0	0	0	0	0	0	0	0	0	6.6622	0	0.23	0	0	0	0	0	1.378	0	2.7568	0	0	0	0	0	0	0	0	0	0	0	0	0	0	0	0	0	0	0	0	0	0	0	0	0	2.527
11.4467	0	0	0	0	0	0	0	0	0	0	0	0	6.6622	0	0	0	0	0	0	0	1.149	0	2.0676	0	0	0	0	0	0	0	0	0	0	0	0	0	0	0	0	0	0	0	0	0	0	0	0	0	2.527
11.456	0	0	0	0	0	0	0	0	0	0	0	0	6.6622	0	0	0	0	0	0	0	0.689	0	1.6081	0	0	0	0	0	0	0	0	0	0	0	0	0	0	0	0	0	0	0	0	0	0	0	0	0	2.068
11.4654	0	0	0	0	0	0	0	0	0	0	0	0	7.5811	0	0	0	0	0	0	0	0.689	0	0.4595	0	0	0	0	0	0	0	0	0	0	0	0	0	0	0	0	0	0	0	0	0	0	0	0	0	3.216
11.4748	0	0	0	0	0	0	0	0	0	0	0	0	8.5	0	0	0	0	0	0	0	1.378	0	0.6892	0	0	0	0	0	0	0	0	0	0	0	0	0	0	0	0	0	0	0	0	0	0	0	0	0	2.757
11.4842	0	0	0	0	0	0	0	0	0	0	0	0	7.3514	0	0	0	0	0	0	0	0.689	0	0.4595	0	0	0	0	0	0	0	0	0	0	0	0	0	0	0	0	0	0	0	0	0	0	0	0	0	1.838
11.4935	0.2297	0	0	0	0	0	0	0	0	0	0	0	7.1216	0	0	0	0	0	0	0	0.689	0	0.4595	0	0	0	0	0	0	0	0	0	0	0	0	0	0	0	0	0	0	0	0	0	0	0	0	0	1.149
11.5029	0	0	0	0	0	0	0	0	0	0	0	0	6.6622	0	0	0	0	0	0	0	0.919	0	0.9189	0.2297	0	0	0	0	0	0	0	0	0	0	0	0	0	0	0	0	0	0	0	0	0	0	0	0	1.378
11.5123	0	0	0	0	0	0	0	0	0	0	0	0	6.8919	0	0	0	0	0	0	0	0.919	0	0.9189	0	0	0	0	0	0	0	0	0	0	0	0	0	0	0	0	0	0	0	0	0	0	0	0	0	1.378
11.5217	0	0	0	0.459	0	0	0	0	0	0	0	0	7.8108	0	0	0	0	0	0	0	0.23	0	0.6892	0	0	0	0	0	0	0	0	0	0	0	0	0	0	0	0	0	0	0	0	0	0	0	0	0	0.689
11.531	0	0	0	0.23	0	0	0	0	0	0	0	0	7.8108	0	0.459	0	0	0	0	0	0.23	0	0.2297	0	0	0	0	0	0	0	0	0	0	0	0	0	0	0	0	0	0	0	0	0	0	0	0	0	0.23
11.5404	0	0	0	0	0	0	0	0	0	0	0	0	7.1216	0	0.459	0	0	0	0	0	0.459	0	0	0	0	0	0	0	0	0	0	0	0	0	0	0	0	0	0	0	0	0	0	0	0	0	0	0	0
11.5498	0	0	0	0	0	0	0	0	0	0	0	0	6.8919	0	0	0	0	0	0	0	1.608	0	0	0	0	0	0	0	0	0	0	0	0	0	0	0	0	0	0	0	0	0	0	0	0	0	0	0	0
11.5591	0	0	0	0	0	0	0	0	0	0	0	0	7.5811	0	0	0	0	0	0	0	2.068	0	0	0	0	0	0	0	0	0	0	0	0	0	0	0	0	0	0	0	0	0	0	0	0	0	0	0	0
11.5685	0	0	0	0	0	0	0	0	0	0	0	0	8.2703	0	0	0	0	0	0	0	2.527	0	0	0	0	0	0	0	0	0	0	0	0	0	0	0	0	0	0	0	0	0	0	0	0	0	0	0.459	0
11.5779	0	0	0	0	0	0	0	0	0	0	0	0	8.0405	0	0	0	0	0	0	0	1.838	0	0	0	0	0	0	0	0	0	0	0	0	0	0	0	0	0	0	0	0	0	0	0	0	0	0	0	0
11.5873	0	0	0	0	0	0	0	0	0	0	0	0	7.8108	0	0	0	0	0	0	0	2.297	0	0	0	0	0	0	0	0	0	0	0	0	0	0	0	0	0	0	0	0	0	0	0	0	0	0	0	0
11.5966	0	0	0	0	0	0	0.23	0	0	0	0	0	6.8919	0	0	0	0	0	0	0	2.527	0	0	0	0	0	0	0	0	0	0	0	0	0	0	0	0	0	0	0	0	0	0	0	0	0	0	0	0
11.606	0	0	0	0	0	0	0	0	0	0	0	0	4.8243	0	0	0	0	0	0	0	1.608	0	0	0	0	0	0	0	0	0	0	0	0	0	0	0	0	0	0	0	0	0	0	0	0	0	0	0	0
11.6154	0	0	0	0	0	0	0	0	0	0	0	0	4.1351	0	0	0	0	0	0	0	0.919	0	0	0	0	0	0	0	0	0	0	0	0	0	0	0	0	0	0	0	0	0	0	0	0	0	0	0	0
11.6248	0	0	0	0	0	0	0	0	0	0	0	0	3.9054	0	0	0	0	0	0	0	1.378	0	0	0	0	0	0	0	0	0	0	0	0	0	0	0	0	0	0	0	0	0	0	0	0	0	0	0	0.23
11.6341	0	0	0	0	0	0	0	0	0	0	0	0	3.4459	0	0.23	0	0	0	0	0	1.608	0	0.4595	0	0	0	0	0	0	0	0	0	0	0	0	0	0	0	0	0	0	0	0	0	0	0	0	0	0.689
11.6435	0	0	0	0	0	0	0	0	0	0	0	0	3.4459	0	0.23	0	0	0	0	0	2.297	0	0	0	0	0	0	0	0	0	0	0	0	0	0	0	0	0	0	0	0	0	0	0	0	0	0	0	0.919
11.6529	0	0	0	0	0	0	0	0	0	0	0	0	2.7568	0	0.459	0	0	0	0	0	2.297	0	0.2297	0	0	0	0	0	0	0	0	0	0	0	0	0	0	0	0	0	0	0	0	0	0	0	0	0	1.378
11.6623	0	0	0	0	0	0	0	0	0	0	0	0	1.6081	0	0.459	0	0	0	0	0	2.986	0	0.4595	0	0	0	0	0	0	0	0	0	0	0	0	0	0	0	0	0	0	0	0	0	0	0	0	0	2.297
11.6716	0	0	0	0	0	0	0	0	0	0	0	0	3.4459	0	0.689	0	0	0	0	0	2.527	0	0.6892	0	0	0	0	0	0	0	0	0	0	0	0	0	0	0	0	0	0	0	0	0	0	0	0	0	2.527
11.681	0	0	0	0	0	0	0	0	0	0	0	0	2.9865	0	0.689	0	0	0	0	0	1.838	0	0.6892	0	0	0	0	0	0	0	0	0	0	0	0	0	0	0	0	0	0	0	0	0	0	0	0	0	3.446
11.6904	0	0	0	0	0	0	0	0	0	0	0	0	3.9054	0	0.689	0	0	0	0	0	1.378	0	0.6892	0	0	0	0	0	0	0	0	0	0	0	0	0	0	0	0	0	0	0	0	0	0	0	0	0	4.595
11.6998	0	0	0	0	0	0	0	0	0	0	0	0	3.9054	0	0.23	0	0	0	0	0	0.919	0	0.2297	0	0	0	0	0	0	0	0	0	0	0	0	0	0	0	0	0	0	0	0	0	0	0	0	0	4.365
11.7091	0	0	0	0	0	0	0	0	0	0	0	0	4.1351	0	0	0	0	0	0	0	0	0	0.2297	0	0	0	0	0	0	0	0	0	0	0	0	0	0	0	0	0	0	0	0	0	0	0	0	0	4.824
11.7185	0	0	0	0	0	0	0	0	0	0	0	0	4.1351	0	0	0	0	0	0	0	0	0	0.2297	0	0	0	0	0	0	0	0	0	0	0	0	0	0	0	0	0	0	0	0	0	0	0	0	0	5.054
11.7279	0	0	0	0	0	0	0	0	0	0	0	0	4.1351	0	0	0	0	0	0	0	0.459	0	0.2297	0	0	0	0	0	0	0	0	0	0	0	0	0	0	0	0	0	0	0	0	0	0	0	0	0	4.595
11.7373	0	0	0.23	0	0	0	0	0	0	0	0	0	3.6757	0	0	0	0	0	0	0	1.838	0	0.4595	0	0	0	0	0	0	0	0	0	0	0	0	0	0	0	0	0	0	0	0	0	0	0	0	0	4.824
11.7466	0	0	0.23	0	0	0	0	0	0.2297	0	0	0	2.527	0	0	0	0.459	0	0	0	2.297	0	0.4595	0	0	0	0	0	0	0	0	0	0	0	0	0	0	0	0	0	0	0	0	0	0	0	0	0	4.824
11.756	0	0	0	0	0	0	0	0	0	0	0	0	1.1486	0	0	0	0.459	0	0	0	2.757	0	0	0	0	0	0	0	0	0	0	0	0	0	0	0	0	0	0	0	0	0	0	0	0	0	0	0	4.824
11.7654	0	0	0	0	0	0	0	0	0	0	0	0	0.6892	0	0	0	0.689	0	0	0	2.757	0	1.3784	0	0	0	0	0	0	0	0	0	0	0	0	0	0	0	0	0	0	0	0	0	0	0	0	0	3.905
11.7748	0	0	0	0	0	0	0	0	0	0	0	0	0	0	0	0	0.459	0	0	0	2.297	0	1.8378	0	0	0	0	0	0	0	0	0	0	0	0	0	0	0	0	0	0	0	0	0	0	0	0	0	4.365
11.7841	0	0	0	0	0	0	0	0	0	0	0	0	0.2297	0	0	0	0.23	0	0	0	1.608	0	2.527	0	0	0	0	0	0	0	0	0	0	0	0	0	0	0	0	0	0	0	0	0	0	0	0	0	4.595
11.7935	0	0	0	0	0	0	0	0	0	0	0	0	0.2297	0	0	0	0.459	0	0	0	1.608	0	0.9189	0	0	0	0	0	0	0	0	0	0	0	0	0	0	0	0	0	0	0	0	0	0	0	0	0	4.824
11.8029	0	0	0	0	0	0	0	0	0	0	0	0	0.6892	0	0	0	0.23	0	0	0	1.608	0	1.1486	0	0	0	0	0	0	0	0	0	0	0	0	0	0	0	0	0	0	0	0	0	0	0	0	0	2.986
11.8123	0	0	0	0	0	0	0	0	0	0	0	0	0.4595	0	0	0	0	0	0	0	0.689	0	1.1486	0	0	0	0	0	0	0	0	0	0	0	0	0	0	0	0	0	0	0	0	0	0	0	0	0	3.446
11.8216	0	0	0	0	0	0	0	0	0	0	0	0	1.1486	0	0	0	0.23	0	0	0	0.689	0	0.9189	0	0	0	0	0	0	0	0	0	0	0	0	0	0	0	0	0	0	0	0	0	0	0	0	0	2.986
11.831	0	0	0	0	0	0	0	0	0	0	0	0	0.9189	0	0	0	0.459	0	0	0	1.149	0	0.6892	0	0	0	0	0	0	0	0	0	0	0	0	0	0	0	0	0	0	0	0	0	0	0	0	0	3.446
11.8404	0	0	0	0	0	0	0	0	0	0	0	0	0	0	0	0	0.459	0	0	0	2.297	0	0.4595	0	0	0	0	0	0	0	0	0	0	0	0	0	0	0	0	0	0	0	0	0	0	0	0	0	2.757
11.8498	0	0	0	0	0	0	0	0	0	0	0	0	0	0	0	0	0.23	0	0	0	1.608	0	0	0	0	0	0	0	0	0	0	0	0	0	0	0	0	0	0	0	0	0	0	0	0	0	0	0	3.216
11.8591	0	0	0	0	0	0	0	0	0	0	0	0	0.2297	0	0	0	0	0	0	0	1.378	0	0	0	0	0	0	0	0	0	0	0	0	0	0	0	0	0	0	0	0	0	0	0	0	0	0	0	2.527
11.8685	0	0	0	0	0	0	0	0	0	0	0	0	0.2297	0	0.459	0	0	0	0	0	1.378	0	0	0	0	0	0	0	0	0	0	0	0	0	0	0	0	0	0	0	0	0	0	0	0	0	0	0	1.838
11.8779	0	0	0	0	0	0	0	0	0	0	0	0	0.6892	0	0.459	0	0	0	0	0	2.297	0	0	0	0	0	0	0	0	0	0	0	0	0	0	0	0	0	0	0	0	0	0	0	0	0	0	0	1.838
11.8873	0	0	0	0	0	0	0	0	0	0	0	0	0.2297	0	0.459	0	0	0	0	0	1.608	0	0	0	0	0	0	0	0	0	0	0	0	0	0	0	0	0	0	0	0	0	0	0	0	0	0	0	1.608
11.8966	0	0	0	0	0	0	0	0	0	0	0	0	0.2297	0	0	0	0	0	0	0	1.378	0	0.6892	0	0	0	0	0	0	0	0	0	0	0	0	0	0	0	0	0	0	0	0	0	0	0	0	0	2.068
11.906	0	0	0	0	0	0	0	0	0	0	0	0	0.2297	0	0	0	0	0	0	0.2297	1.608	0	0.9189	0	0	0	0	0	0	0	0	0	0	0	0	0	0	0	0	0	0	0	0	0	0	0	0	0	2.757
11.9154	0	0	0	0	0	0	0	0	0	0	0	0	0.2297	0	0	0	0	0	0	0	1.608	0	0.9189	0.2297	0	0	0	0	0	0	0	0	0	0	0	0	0	0	0	0	0	0	0	0	0	0	0	0	2.527
11.9248	0	0	0	0	0	0	0	0	0	0	0	0	0.2297	0	0	0	0	0	0	0	1.838	0	0.9189	0.2297	0	0	0	0	0	0	0	0	0	0	0	0	0	0	0	0	0	0	0	0	0	0	0	0	2.527
11.9341	0	0	0	0	0	0	0	0	0	0	0	0	0	0	0.459	0	0	0	0	0	0.919	0	0.9189	0.2297	0	0	0	0	0	0	0	0	0	0	0	0	0	0	0	0	0	0	0	0	0	0	0	0	3.905
11.9435	0	0	0	0	0	0	0	0	0	0	0	0	0	0	0.459	0	0	0	0	0	1.378	0	0.4595	0.2297	0	0	0	0	0	0	0	0	0	0	0	0	0	0	0	0	0	0	0	0	0	0	0	0	4.824
11.9529	0	0	0	0	0	0	0	0	0	0	0	0	0	0	0.23	0	0	0	0	0	1.378	0	0	0	0	0	0	0	0	0	0	0	0	0	0	0	0	0	0	0	0	0	0	0	0	0	0	0	5.284
11.9623	0	0	0	0	0	0	0	0	0	0	0	0	0.2297	0	0	0	0.23	0	0	0	1.608	0	0.2297	0	0	0	0	0	0	0	0	0	0	0	0	0	0	0	0	0	0	0	0	0	0	0	0	0	5.284
11.9716	0	0	0	0	0	0	0	0	0	0	0	0	0.4595	0	0	0	0	0	0	0	1.608	0	1.1486	0	0	0	0	0	0	0	0	0	0	0	0	0	0	0	0	0	0	0	0	0	0	0	0	0	5.514
11.981	0	0	0	0	0	0	0	0	0	0	0	0	1.3784	0	0	0	0	0	0	0	2.068	0	1.3784	0	0	0	0	0	0	0	0	0	0	0	0	0	0	0	0	0	0	0	0	0	0	0	0	0	5.514
11.9904	0	0	0	0	0	0	0	0	0	0	0	0	1.3784	0	0	0	0	0	0	0	1.378	0	1.3784	0	0	0	0	0	0	0	0	0	0	0	0	0	0	0	0	0	0	0	0	0	0	0	0	0	4.824
11.9998	0	0	0	0	0	0	0	0	0	0	0	0	0.9189	0	0	0	0	0	0	0	1.838	0	0.9189	0	0	0	0	0	0	0	0	0	0	0	0	0	0	0	0	0	0	0	0	0	0	0	0	0	5.514
12.0091	0	0	0	0	0	0	0	0	0	0	0	0	0.9189	0	0	0	0	0	0	0	2.068	0	0.9189	0	0	0	0	0	0	0	0	0	0	0	0	0	0	0	0	0	0	0	0	0	0	0	0	0	5.054
12.0185	0	0	0	0	0	0	0	0	0	0	0	0	0.2297	0	0	0	0	0	0	0	2.986	0	1.1486	0	0	0	0	0	0	0	0	0	0	0	0	0	0	0	0	0	0	0	0	0	0	0	0	0	5.973
12.0279	0	0	0	0	0	0	0	0	0	0	0	0	0.2297	0	0	0	0	0	0	0	4.135	0	0.6892	0	0	0	0	0	0	0	0	0	0	0	0	0	0	0	0	0	0	0	0	0	0	0	0	0	6.203
12.0373	0	0	0	0	0	0	0	0	0	0	0	0	0	0	0	0	0	0	0	0	2.757	0	0.6892	0	0	0	0	0	0	0	0	0	0	0	0	0	0	0	0	0	0	0	0	0	0	0	0	0	6.892
12.0466	0	0	0	0	0	0	0	0	0	0	0	0	0	0	0	0	0.459	0	0	0	2.297	0	0.4595	0	0	0	0	0	0	0	0	0	0	0	0	0	0	0	0	0	0	0	0	0	0	0	0	0	6.432
12.056	0	0	0	0	0	0	0	0	0	0	0	0	0	0	0	0	0.459	0	0	0	2.297	0	1.3784	0	0	0	0	0	0	0	0	0	0	0	0	0	0	0	0	0	0	0	0	0	0	0	0	0	7.122
12.0654	0	0	0	0	0	0	0	0	0	0	0	0	0	0	0	0	0.23	0	0	0	2.527	0	2.2973	0	0	0	0	0	0	0	0	0	0	0	0	0	0	0	0	0	0	0	0	0	0	0	0	0	6.662
12.0748	0	0	0	0	0	0	0	0	0	0	0	0	0	0	0	0	0	0	0	0	2.297	0	2.7568	0	0	0	0	0	0	0	0	0	0	0	0	0	0	0	0	0	0	0	0	0	0	0	0	0	6.203
12.0841	0.2297	0	0	0	0	0	0	0	0	0	0	0	0	0	0	0.23	0	0	0	0	1.608	0	3.6757	0	0	0	0	0	0	0	0	0	0	0	0	0	0	0	0	0	0	0	0	0	0	0	0	0	5.743
12.0935	0.2297	0	0	0	0	0	0	0	0	0	0	0	0.4595	0	0	0.23	0	0	0	0	3.905	0	3.6757	0	0	0	0	0	0	0	0	0	0	0	0	0	0	0	0	0	0	0	0	0	0	0	0	0	6.432
12.1029	0.2297	0	0	0	0	0	0	0	0	0	0	0	0.4595	0	0	0	0	0	0	0	4.135	0	3.9054	0	0	0	0	0	0	0	0	0	0	0	0	0	0	0	0	0	0	0	0	0	0	0	0	0	7.122
12.1123	0	0	0	0	0	0	0	0	0	0	0	0	0	0	0	0	0.23	0	0	0	4.824	0	2.0676	0	0	0	0	0	0	0	0	0	0	0	0	0	0	0	0	0	0	0	0	0	0	0	0	0	7.351
12.1216	0	0	0	0	0	0	0	0	0	0	0	0	0	0	0	0	0.23	0	0	0	3.905	0	1.6081	0	0	0	0	0	0	0	0	0	0	0	0	0	0	0	0	0	0	0	0	0	0	0	0	0	7.351
12.131	0	0	0	0	0	0	0	0	0	0	0	0	0.2297	0	0	0	0.689	0	0	0	2.986	0	0	0	0	0	0	0	0	0	0	0	0	0	0	0	0	0	0	0	0	0	0	0	0	0	0	0	7.351
12.1404	0	0	0	0	0	0	0	0	0	0	0	0	0.9189	0	0	0	0.459	0	0	0	2.986	0	0.2297	0	0	0	0	0	0	0	0	0	0	0	0	0	0	0	0	0	0	0	0	0	0	0	0	0	7.811
12.1498	0	0	0	0	0	0	0	0	0	0	0	0	1.6081	0	0	0	0.23	0	0	0	2.527	0	0.2297	0	0	0	0	0	0	0	0	0	0	0	0	0	0	0	0	0	0	0	0	0	0	0	0	0	8.5
12.1591	0	0	0	0	0	0	0	0	0	0	0	0	2.0676	0	0	0	0.23	0	0	0	2.297	0	0.2297	0	0	0	0	0	0	0	0	0	0	0	0	0	0	0	0	0	0	0	0	0	0	0	0	0	7.811
12.1685	0	0	0	0	0	0	0	0	0	0	0	0	1.8378	0	0	0	0.919	0	0	0	2.527	0	0	0	0	0	0	0	0	0	0	0	0	0	0	0	0	0	0	0	0	0	0	0	0	0	0	0	6.892
12.1779	0	0	0	0	0	0	0	0	0	0	0	0	1.6081	0	0	0	1.149	0	0	0	1.838	0	0.4595	0	0	0	0	0	0	0	0	0	0	0	0	0	0	0	0	0	0	0	0	0.23	0.23	0	0	0	6.892
12.1873	0	0	0	0	0	0	0	0	0	0	0	0	2.2973	0	0	0	1.149	0	0	0	2.068	0	0.6892	0	0	0	0	0	0	0	0	0	0	0	0	0	0	0	0	0	0	0	0	0.459	0.459	0	0	0	7.122
12.1966	0	0	0	0	0	0	0	0	0	0	0	0	3.6757	0	0	0	0.689	0	0	0	2.297	0	1.1486	0	0	0	0	0	0	0	0	0	0	0	0	0	0	0	0	0	0	0	0	0	0	0	0	0	7.351
12.206	0	0	0	0	0	0	0	0	0	0	0	0	3.4459	0	0	0	0.459	0	0	0	3.676	0	0.9189	0	0	0	0	0	0	0	0	0	0	0	0	0	0	0	0	0	0	0	0	0	0	0	0	0	7.122
12.2154	0	0	0	0	0	0	0	0	0	0	0	0	3.9054	0	0	0	0	0	0.23	0	3.216	0	0.4595	0	0	0	0	0	0	0	0	0	0	0	0	0	0	0	0	0	0	0	0	0	0	0	0	0	8.73
12.2248	0	0	0	0	0	0	0	0	0	0	0	0	5.0541	0	0	0	0.23	0	0.23	0	2.986	0	0	0	0	0	0	0	0	0	0	0	0	0	0	0	0	0	0	0	0	0	0	0	0	0	0	0	8.041
12.2341	0	0	0	0	0	0	0	0	0	0	0	0	5.7432	0	0	0	0.459	0	0	0	1.838	0	0.4595	0	0	0	0	0	0	0	0	0	0	0	0	0	0	0	0	0	0	0	0	0	0	0	0	0	8.041
12.2435	0	0	0	0	0	0	0	0	0	0	0	0	5.973	0	0	0	1.149	0	0.23	0	2.068	0	0.4595	0	0	0	0	0	0	0	0	0	0	0	0	0	0	0	0	0	0	0	0	0	0	0	0	0	8.041
12.2529	0	0	0	0	0	0	0	0	0	0	0	0	4.3649	0	0.23	0	0.459	0	0	0	1.838	0	0.9189	0	0	0	0	0	0	0	0	0	0	0	0	0	0	0	0	0	0	0	0	0	0	0	0	0	7.581
12.2623	0	0	0	0	0	0	0	0	0	0	0	0	3.6757	0	0.23	0.23	0.459	0	0	0	4.824	0	1.3784	0	0	0	0	0	0	0	0	0	0	0	0	0	0	0	0	0	0	0	0	0	0	0	0	0	5.743
12.2716	0	0	0	0	0	0	0	0	0	0	0	0	3.9054	0	0	0.23	0.23	0	0	0	5.514	0	1.1486	0	0	0	0	0	0	0	0	0	0	0	0	0	0	0	0	0	0	0	0	0	0	0	0	0	4.824
12.281	0	0	0	0	0	0	0	0	0	0	0	0	3.4459	0	0	0	0	0	0	0	4.135	0	0.4595	0	0	0	0	0	0	0	0	0	0	0	0	0	0	0	0	0	0	0	0	0	0	0	0	0	5.054
12.2904	0	0	0	0	0	0	0	0	0	0	0	0	2.7568	0	0	0.23	0	0	0	0	3.905	0	0	0	0	0	0	0	0	0	0	0	0	0	0	0	0	0	0	0	0	0	0	0	0	0	0	0	5.284
12.2998	0	0	0	0	0	0	0	0	0	0	0	0	1.8378	0	0	0	0	0	0	0	3.676	0	0	0	0	0	0	0	0	0	0	0	0	0	0	0	0	0	0	0	0	0	0	0	0	0	0	0	5.514
12.3091	0	0	0	0	0	0	0	0	0	0	0	0	1.3784	0	0	0	0	0	0	0	4.365	0	0	0	0	0.23	0	0	0	0	0	0	0	0	0	0	0	0	0	0	0	0	0	0	0	0	0	0	5.743
12.3185	0	0	0	0	0	0	0	0	0	0	0	0	2.527	0	0	0	0	0	0	0	3.676	0	0	0	0	0	0	0	0	0	0	0	0	0	0	0	0	0	0	0	0	0	0	0	0	0	0	0	4.824
12.3279	0	0	0	0	0	0	0	0	0	0	0	0	2.2973	0	0	0	0	0	0	0	2.068	0	0	0	0	0	0	0	0	0	0	0	0	0	0	0	0	0	0	0	0	0	0	0	0	0	0	0	5.743
12.3373	0	0	0	0	0	0	0	0	0	0	0	0	2.527	0	0	0	0	0	0	0	2.068	0	0	0	0	0	0	0	0	0	0	0	0	0	0	0	0	0	0	0	0	0	0	0	0	0	0	0	6.203
12.3466	0	0	0	0	0	0	0	0	0	0	0	0	1.8378	0	0	0	0	0	0	0	1.608	0	0.2297	0	0	0	0	0	0	0	0	0	0	0	0	0	0	0	0	0	0	0	0	0	0	0	0	0	6.662
12.356	0	0	0	0	0	0	0	0	0	0	0	0	2.2973	0	0	0	0.689	0	0	0	1.838	0	0.4595	0	0	0	0	0	0	0	0	0	0	0	0	0	0	0	0	0	0	0	0	0	0	0	0	0	6.203
12.3654	0	0	0	0	0	0	0	0	0	0	0	0	4.1351	0	0	0	0.919	0	0	0	1.149	0	0.4595	0	0	0	0	0	0	0	0	0	0	0	0	0	0	0	0	0	0	0	0	0	0	0	0	0	5.743
12.3748	0	0	0	0	0	0	0	0	0	0	0	0	4.3649	0	0	0	0.689	0	0	0	1.149	0	0	0	0	0	0	0	0	0	0	0	0	0	0	0	0	0	0	0	0	0	0	0	0	0	0	0	5.054
12.3841	0	0	0	0	0	0	0	0	0	0	0	0	3.9054	0	0	0	0.23	0	0	0	1.378	0	0.2297	0	0	0	0	0	0	0	0	0	0	0	0	0	0	0	0	0	0	0	0	0	0	0	0	0	5.054
12.3935	0	0	0	0	0	0	0	0	0	0	0	0	2.527	0	0	0	0	0	0	0	1.838	0	0.2297	0	0	0	0	0	0	0	0	0	0	0	0	0	0	0	0	0	0	0	0	0	0	0	0	0	5.743
12.4029	0	0	0	0	0	0	0	0	0	0	0	0	2.527	0	0.23	0	0	0	0	0	1.378	0	0.6892	0	0	0	0	0	0	0	0	0	0	0	0	0	0	0	0	0	0	0	0	0	0	0	0	0	5.054
12.4123	0	0	0	0	0	0	0	0	0	0	0	0	1.6081	0	0.23	0	0	0	0	0	0.689	0	0.4595	0	0	0	0	0	0	0	0	0	0	0	0	0	0	0	0	0	0	0	0	0	0	0	0	0	5.514
12.4216	0	0	0	0	0	0	0	0	0.4595	0	0	0	2.0676	0	0.23	0	0	0	0	0	0.459	0	0.4595	0	0	0	0	0	0	0	0	0	0	0	0	0	0	0	0	0	0	0	0	0	0	0	0	0	4.824
12.431	0	0	0	0	0	0	0	0	0.4595	0	0	0	1.8378	0	0.23	0	0	0	0	0	0.459	0	0.4595	0	0	0	0	0	0	0	0	0	0	0	0	0	0	0	0	0	0	0	0	0	0	0	0	0	3.905
12.4404	0	0	0	0	0	0	0	0	0	0	0	0	1.3784	0	0	0	0	0	0	0	0	0	0.2297	0	0	0	0	0	0	0	0	0	0	0	0	0	0	0	0	0	0	0	0	0	0	0	0	0	3.676
12.4498	0	0	0	0	0	0	0	0	0.2297	0	0	0	0.6892	0	0	0	0	0	0	0	0	0	0.6892	0	0	0	0	0	0	0	0	0	0	0	0	0	0	0	0	0	0	0	0	0	0	0	0	0	3.905
12.4591	0	0	0	0	0	0	0	0	0	0	0	0	0.4595	0	0	0	0	0	0	0	0.919	0	0.9189	0	0	0	0	0	0	0	0	0	0	0	0	0	0	0	0	0	0	0	0	0	0	0	0	0	5.743
12.4685	0	0	0	0	0	0	0	0	0	0	0	0	0.2297	0	0	0	0	0	0	0	1.608	0	0.6892	0	0	0	0	0	0	0	0	0	0	0	0	0	0	0	0	0	0	0	0	0	0	0	0	0	6.432
12.4779	0	0	0	0	0	0	0	0	0	0	0	0	0	0	0	0	0	0	0	0	1.838	0	0.9189	0	0	0	0	0	0	0	0	0	0	0	0	0	0	0	0	0	0	0	0	0	0	0	0	0	5.743
12.4873	0	0	0	0	0	0	0	0	0	0	0	0	0	0	0	0	0	0	0	0	2.527	0	1.3784	0	0	0	0	0	0	0	0	0	0	0	0	0	0	0	0	0	0	0	0	0	0	0	0	0	6.662
12.4966	0	0	0	0	0	0	0	0	0	0	0	0	0	0	0.919	0	0	0	0	0	2.757	0	1.1486	0	0	0	0	0	0	0	0	0	0	0	0	0	0	0	0	0	0	0	0	0	0	0	0	0	6.432
12.506	0	0	0	0	0	0	0	0	0	0	0	0	0	0	1.149	0	0	0	0	0	4.135	0	1.3784	0.2297	0	0	0	0	0	0	0	0	0	0	0	0	0	0	0	0	0	0	0	0	0	0	0	0	5.973
12.5154	0.4595	0	0	0	0	0	0	0	0	0	0	0	0.4595	0	0.23	0	0.23	0	0	0	4.824	0	0.9189	0.4595	0	0	0	0	0	0	0	0	0	0	0	0	0	0	0	0	0	0	0	0	0	0	0	0	5.743
12.5248	0.2297	0	0	0	0	0	0	0	0	0	0	0	0.2297	0	0.23	0	0.689	0	0	0	4.595	0	0.4595	0.6892	0	0	0	0	0	0	0	0	0	0	0	0	0	0	0	0	0	0	0	0	0	0	0	0	5.284
12.5341	0	0	0	0	0	0	0	0	0	0	0	0	0	0	0	0	0.689	0	0	0	5.054	0	0.9189	0.4595	0	0	0	0	0	0	0	0	0	0	0	0	0	0	0	0	0	0	0	0	0	0	0	0	6.892
12.5435	0	0	0	0	0	0	0	0	0	0	0	0	0	0	0	0	0.459	0	0	0	3.446	0	0.6892	0.2297	0	0	0	0	0	0	0	0	0	0	0	0	0	0	0	0	0	0	0	0	0	0	0	0	6.432
12.5529	0	0	0	0	0	0	0	0	0	0	0	0	0.2297	0	0	0	0.459	0	0	0	2.297	0	0.9189	0	0	0	0	0	0	0	0	0	0	0	0	0	0	0	0	0	0	0	0	0	0	0	0	0	7.811
12.5623	0	0	0	0	0	0	0	0	0	0	0	0	0.9189	0	0	0	0.23	0	0	0	1.149	0	0.2297	0	0	0	0	0	0	0	0	0	0	0	0	0	0	0	0	0	0	0	0	0	0	0	0	0	7.581
12.5716	0	0	0	0	0	0	0	0	0	0	0	0	0.9189	0	0	0	0.23	0	0	0	0.919	0	0	0	0	0	0	0	0	0	0	0	0	0	0	0	0	0	0	0	0	0	0	0	0	0	0	0	7.122
12.581	0	0	0	0	0	0	0	0	0	0	0	0	1.8378	0	0	0.23	0	0	0	0	0.919	0	0	0	0	0	0	0	0	0	0	0	0	0	0	0	0	0	0	0	0	0	0	0	0	0	0	0	8.5
12.5904	0	0	0	0.23	0	0	0	0	0	0	0	0	0.9189	0	0	0	0	0	0	0	1.608	0	0	0	0	0	0	0	0	0	0	0	0	0	0	0	0	0	0	0	0	0	0	0	0	0	0	0	7.811
12.5998	0.2297	0	0	0.23	0	0	0	0	0	0	0	0	0.6892	0	0	0	0	0	0	0	2.068	0	0	0	0	0.459	0	0	0	0	0	0	0	0	0	0	0	0	0	0	0	0	0	0	0	0	0	0	7.811
12.6091	0	0	0	0.459	0	0	0	0	0	0	0	0	0.9189	0	0	0	0	0	0	0	1.838	0	0	0.2297	0	0.23	0	0	0	0	0	0	0	0	0	0	0	0	0	0	0	0	0	0	0	0	0	0	7.351
12.6185	0	0	0	0.459	0	0	0	0	0	0	0	0	0.9189	0	0	0	0	0	0	0	1.838	0	0	0	0	0	0	0	0	0	0	0	0	0	0	0	0	0	0	0	0	0	0	0	0	0	0	0	7.351
12.6279	0	0	0	0.23	0	0	0	0	0	0	0	0	0.9189	0	0	0	0	0	0	0	1.608	0	0	0	0	0	0	0	0	0	0	0	0	0	0	0	0	0	0	0	0	0	0	0	0	0	0	0	7.811
12.6373	0	0	0	0.459	0	0	0	0	0	0	0	0	0.9189	0	0	0	0	0	0	0	1.838	0	0	0	0	0	0	0	0	0	0	0	0	0	0	0	0	0	0	0	0	0	0	0	0	0	0	0	7.811
12.6466	0	0	0	0.23	0	0	0	0	0	0	0	0	0.4595	0	0	0	0	0	0	0	1.608	0	0.2297	0.2297	0	0	0	0	0	0	0	0	0	0	0	0	0	0	0	0	0	0	0	0	0	0	0	0	7.811
12.656	0	0	0	0	0	0	0	0	0	0	0	0	0.2297	0	0	0.23	0.23	0	0	0	2.527	0	0.6892	0	0	0	0	0	0	0	0	0	0	0	0	0	0	0	0	0	0	0	0	0	0	0	0	0	8.041
12.6654	0	0	0	0	0	0	0	0	0	0	0	0	0.6892	0	0	0	0	0	0	0	2.986	0	0.6892	0	0	0	0	0	0	0	0	0	0	0	0	0	0	0	0	0	0	0	0	0	0	0	0	0	6.662
12.6748	0	0	0	0	0	0	0	0	0	0	0	0	0.4595	0	0	0	0	0	0	0	2.757	0	0.4595	0	0	0	0	0	0	0	0	0	0	0	0	0	0	0	0	0	0	0	0	0	0	0	0	0	7.581
12.6841	0	0	0	0	0	0	0	0	0	0	0	0	0.2297	0	0	0	0	0	0	0	2.986	0	0	0	0	0	0	0	0	0	0	0	0	0	0	0	0	0	0	0	0	0	0	0	0	0	0	0	7.351
12.6935	0	0	0	0	0	0	0	0	0	0	0	0	0.4595	0	0	0	0.23	0	0	0	2.757	0	0	0	0	0	0	0	0	0	0	0	0	0	0	0	0	0	0	0	0	0	0	0	0	0	0	0	7.351
12.7029	0	0	0	0	0	0	0	0	0	0	0	0	0.2297	0	0	0	0.459	0	0	0	2.986	0	0	0	0	0	0	0	0	0	0	0	0	0	0	0	0	0	0	0	0	0	0	0	0	0	0	0	8.041
12.7123	0	0	0	0	0	0	0	0	0	0	0	0	1.1486	0	0	0	0.689	0	0	0	1.149	0	0	0	0	0	0	0	0	0	0	0	0	0	0	0	0	0	0	0	0	0	0	0	0	0	0	0	8.27
12.7216	0	0	0	0	0	0	0	0	0	0	0	0	0.9189	0	0	0	0.459	0	0	0	0.919	0	0	0	0	0	0	0	0	0	0	0	0	0	0	0	0	0	0	0	0	0	0	0	0	0	0	0	7.811
12.731	0	0	0	0	0	0	0	0	0	0	0	0	1.1486	0	0	0	0.23	0	0	0	2.068	0	0	0	0	0	0	0	0	0	0	0	0	0	0	0	0	0	0	0	0	0	0	0	0	0	0	0	8.041
12.7404	0	0	0	0	0	0	0	0	0	0	0	0	0.6892	0	0	0	0	0	0	0	2.297	0	0	0	0	0	0	0	0	0	0	0	0	0	0	0	0	0	0	0	0	0	0	0	0	0	0	0	8.27
12.7498	0	0.23	0	0	0	0	0	0	0	0	0	0	0.6892	0	0	0	0	0	0	0	1.838	0	0	0	0	0	0	0	0	0	0	0	0	0	0	0	0	0	0	0	0	0	0	0	0	0	0	0	7.811
12.7591	0	0	0	0	0	0	0	0	0	0	0	0	0.6892	0	0	0	0	0	0	0	1.378	0	0	0	0	0	0	0	0	0	0	0	0	0	0	0	0	0	0	0	0	0	0	0	0	0	0	0	7.581
12.7685	0	0	0	0	0	0	0	0	0	0	0	0	0	0	0	0	0	0	0	0	2.068	0	0	0	0	0	0	0	0	0	0	0	0	0	0	0	0	0	0	0	0	0	0	0	0	0	0	0	6.892
12.7779	0	0	0	0	0	0	0	0	0	0	0	0	0	0	0	0	0.23	0	0	0	2.068	0	0	0	0	0	0	0	0	0	0	0	0	0	0	0	0	0	0	0	0	0	0	0	0	0	0	0	7.811
12.7873	0	0	0	0	0	0	0	0	0	0	0	0	0	0	0	0	0.459	0	0	0	1.149	0	0	0	0	0	0	0	0	0	0	0	0	0	0	0	0	0	0	0	0	0	0	0	0	0	0	0	7.122
12.7966	0	0	0	0	0	0	0	0	0	0	0	0	0	0	0	0	0.689	0	0	0	0.919	0	0	0	0	0	0	0	0	0	0	0	0	0	0	0	0	0	0	0	0	0	0	0	0	0	0	0	7.811
12.806	0	0	0	0	0	0	0	0	0	0	0	0	0	0	0	0	0.919	0	0	0	0.919	0	0	0	0	0	0	0	0	0	0	0	0	0	0	0	0	0	0	0	0	0	0	0	0	0	0	0	7.811
12.8154	0	0	0	0	0	0	0	0	0	0	0	0	0	0	0.459	0	1.378	0	0	0	0.459	0	0	0	0	0	0	0	0	0	0	0	0	0	0	0	0	0	0	0	0	0	0	0	0	0	0	0	7.351
12.8247	0	0	0	0	0	0	0	0	0	0	0	0	0	0	0	0	1.149	0	0	0	0.689	0	0.2297	0	0	0	0	0	0	0	0	0	0	0	0	0	0	0	0	0	0	0	0	0	0	0	0	0	7.122
12.8341	0	0	0	0.23	0	0	0	0	0	0	0	0	0.4595	0	0.23	0	0.919	0	0	0	1.608	0	0.6892	0.4595	0	0	0	0	0	0	0	0	0	0	0	0	0	0	0	0	0	0	0	0	0	0	0	0	7.351
12.8435	0	0	0	0.23	0	0	0	0	0	0	0	0	0.4595	0	0	0	0.919	0	0	0	2.297	0	0.2297	0.6892	0	0	0	0	0	0	0	0	0	0	0	0	0	0	0	0	0	0	0	0	0	0	0	0	6.432
12.8529	0	0	0	0.23	0	0	0	0	0	0	0	0	1.3784	0	0	0	1.378	0	0	0	2.757	0	0.2297	0.2297	0	0	0	0	0	0	0	0	0	0	0	0	0	0	0	0	0	0	0	0	0	0	0	0	5.514
12.8622	0	0	0	0.23	0	0	0	0	0	0	0	0	1.6081	0	0	0	0.919	0	0	0	3.216	0	0	0.4595	0	0	0	0	0	0	0	0	0	0	0	0	0	0	0	0	0	0	0	0	0	0	0	0	5.973
12.8716	0	0	0	0	0	0	0	0.23	0	0	0	0	2.527	0	0.23	0	0.689	0	0	0	3.446	0	0	0.2297	0	0	0	0	0	0	0	0	0	0	0	0	0	0	0	0	0	0	0	0	0	0	0	0	5.514
12.881	0	0	0	0	0	0	0	0.23	0	0	0	0	2.2973	0	0.23	0	0.23	0	0	0	2.068	0	0	0	0	0	0	0	0	0	0	0	0	0	0	0	0	0	0	0	0	0	0	0	0	0	0	0	5.284
12.8904	0	0	0	0	0	0	0	0	0	0	0	0	2.2973	0	0	0	0	0	0	0	2.297	0	0	0	0	0	0	0	0	0	0	0	0	0	0	0	0	0	0	0	0	0	0	0	0	0	0	0	5.743
12.8997	0	0	0	0	0	0	0	0	0	0	0	0	2.9865	0	0.23	0	0.459	0	0	0	1.149	0	0.2297	0	0	0	0	0	0	0	0	0	0	0	0	0	0	0	0	0	0	0	0	0	0	0	0	0	4.824
12.9091	0	0	0	0	0	0	0	0	0	0	0	0	1.3784	0	0	0	0.459	0	0	0	0.919	0	0.4595	0	0	0	0	0	0	0	0	0	0	0	0	0	0	0	0	0	0	0	0	0	0	0	0	0	4.824
12.9185	0	0	0	0	0	0	0	0	0	0	0	0	1.1486	0	0	0	0.689	0	0	0	0.689	0	0.4595	0	0	0	0	0	0	0	0	0	0	0	0	0	0	0	0	0	0	0	0	0	0	0	0	0	4.595
12.9279	0	0	0	0	0	0	0	0	0	0	0	0	1.6081	0	0	0	0.689	0	0	0	0.23	0	0.6892	0	0	0	0	0	0	0	0	0	0	0	0	0	0	0	0	0	0	0	0	0	0	0	0	0	5.743
12.9372	0.2297	0	0	0	0	0	0	0	0	0	0	0	0.9189	0	0.23	0	0.919	0	0	0	0.23	0	0.4595	0	0	0	0	0	0	0	0	0	0	0	0	0	0	0	0	0	0	0	0	0	0	0	0	0	4.824
12.9466	0.6892	0	0	0	0	0	0	0	0	0	0	0	2.0676	0	0.23	0	1.378	0	0	0	1.378	0	0.6892	0	0	0	0	0	0	0	0	0	0	0	0	0	0	0	0	0	0	0	0	0	0	0	0	0	3.446
12.956	0.6892	0	0	0	0	0	0	0	0	0	0	0	1.6081	0	0	0	1.149	0	0	0	2.297	0	0.2297	0	0	0	0	0	0	0	0	0	0	0	0	0	0	0	0	0	0	0	0	0	0	0	0	0	2.986
12.9654	0.4595	0	0	0	0	0	0	0	0	0	0	0	2.2973	0	0	0	0.919	0	0	0	0.689	0	0.2297	0	0	0	0	0	0	0	0	0	0	0	0	0	0	0	0	0	0	0	0	0	0	0	0	0	2.757
12.9747	0	0	0	0	0	0	0	0	0	0	0	0	2.9865	0	0.23	0	0.689	0	0	0	2.297	0	0.4595	0	0	0	0	0	0	0	0	0	0	0	0	0	0	0	0	0	0	0	0	0	0	0	0	0	2.986
12.9841	0	0	0	0	0	0	0	0	0	0	0	0	2.527	0	0.23	0	0.23	0	0	0	2.527	0	0.2297	0	0	0	0	0	0	0	0	0	0	0	0	0	0	0	0	0	0	0	0	0	0	0	0	0	3.905
12.9935	0.6892	0	0	0	0	0	0	0	0	0	0	0	1.6081	0	0	0	0.689	0	0	0	2.757	0	0	0.2297	0	0	0	0	0	0	0	0	0	0	0	0	0	0	0	0	0	0	0	0	0	0	0	0	4.135
13.0029	0.9189	0	0	0	0	0	0	0	0	0	0	0	0.9189	0	0	0	0.459	0	0	0	1.838	0	0.2297	0.4595	0	0	0	0	0	0	0	0	0	0	0	0	0	0	0	0	0	0	0	0	0	0	0	0	5.514
13.0122	1.1486	0	0	0	0	0	0	0	0	0	0	0	1.6081	0	0	0	0.459	0	0	0	2.297	0	0.4595	0	0	0	0	0	0	0	0	0	0	0	0	0	0	0	0	0	0	0	0	0	0	0	0	0	5.973
13.0216	0.6892	0	0	0	0	0	0	0	0	0	0	0	1.3784	0	0	0	0.23	0	0	0	1.608	0	1.1486	0	0	0	0	0	0	0	0	0	0	0	0	0	0	0	0	0	0	0	0	0	0	0	0	0	6.432
13.031	0.4595	0	0	0	0	0	0	0	0	0	0	0	1.1486	0	0	0	0	0	0	0	1.838	0	1.6081	0	0	0	0	0	0	0	0	0	0	0	0	0	0	0	0	0	0	0	0	0	0	0	0	0	6.892
13.0404	0.2297	0	0	0	0	0	0	0	0	0	0	0	1.6081	0	0	0	0	0	0	0	2.757	0	1.1486	0	0	0	0	0	0	0	0	0	0	0	0	0	0	0	0	0	0	0	0	0	0	0	0	0	6.662
13.0497	0	0	0	0	0	0	0	0	0	0	0	0	1.1486	0	0	0	0.23	0	0	0	3.676	0	0.4595	0	0	0	0	0	0	0	0	0	0	0	0	0	0	0	0	0	0	0	0	0	0	0	0	0	6.432
13.0591	0	0	0	0	0	0	0	0	0	0	0	0	0.9189	0	0	0	0.689	0	0	0	4.365	0	0	0	0	0	0	0	0	0	0	0	0	0	0	0	0	0	0	0	0	0	0	0	0	0	0	0	5.284
13.0685	0	0	0	0	0	0	0	0	0	0	0	0	1.1486	0	0.23	0	0.689	0	0	0	3.905	0	0	0	0	0	0	0	0	0	0	0	0	0	0	0	0	0	0	0	0	0	0	0	0	0	0	0	5.743
13.0779	0	0	0	0	0	0	0	0	0	0	0	0	0.9189	0	0.23	0	0.919	0	0	0	2.297	0	0.2297	0	0	0	0	0	0	0	0	0	0	0	0	0	0	0	0	0	0	0	0	0	0	0	0	0	6.432
13.0872	0	0	0	0	0	0	0	0	0	0	0	0	0.4595	0	0	0	1.149	0	0	0	1.608	0	0	0.6892	0	0	0	0	0	0	0	0	0	0	0	0	0	0	0	0	0	0	0	0	0	0	0	0	5.973
13.0966	0.2297	0	0	0	0	0	0.23	0	0	0	0	0	0.6892	0	0	0	1.378	0	0	0	0.919	0	0	0.6892	0	0	0	0	0	0	0	0	0	0	0	0	0	0	0	0	0	0	0	0	0	0	0	0	7.581
13.106	0.2297	0	0	0	0	0	0	0	0	0	0	0	0.6892	0	0	0	1.149	0	0	0	0.689	0	0	0.6892	0	0	0	0	0	0	0	0	0	0	0	0	0	0	0	0	0	0	0	0	0	0	0	0	8.73
13.1154	0.6892	0	0	0	0	0	0	0	0	0	0	0	0.6892	0	0	0	0.919	0	0	0	1.149	0	0	0.6892	0	0	0	0	0	0	0	0	0	0	0	0	0	0	0	0	0	0	0	0	0	0	0	0	7.811
13.1247	1.1486	0	0	0	0	0	0	0	0	0	0	0	0.2297	0	0	0	0.689	0	0	0	0.919	0	0.2297	0.4595	0	0	0	0	0	0	0	0	0	0	0	0	0	0	0	0	0	0	0	0	0	0	0	0	7.351
13.1341	0.9189	0	0	0	0	0	0	0	0	0	0	0	0	0	0	0	0.23	0	0	0	0.919	0	0.6892	0.4595	0	0	0	0	0	0	0	0	0	0	0	0	0	0	0	0	0	0	0	0	0	0	0	0	7.581
13.1435	0.4595	0	0	0	0	0	0	0	0	0	0	0	0.2297	0	0	0	0.23	0	0	0	1.378	0	0.6892	0	0	0	0	0	0	0	0	0	0	0	0	0	0	0	0	0	0	0	0	0	0	0	0	0	8.5
13.1529	0.6892	0	0	0	0	0	0	0	0	0	0	0	0.2297	0	0.23	0	0.23	0	0	0	1.378	0	0.4595	0.2297	0	0	0	0	0	0	0	0	0	0	0	0	0	0	0	0	0	0	0	0	0	0	0	0	8.041
13.1622	0.9189	0	0	0	0	0	0	0	0	0	0	0	0.9189	0	0.23	0	0	0	0	0	0.919	0	0	0.2297	0	0	0	0	0	0	0	0	0	0	0	0	0	0	0	0	0	0	0	0	0	0	0	0	7.122
13.1716	0.9189	0	0	0	0	0	0	0	0	0	0	0	0.9189	0	0.23	0	0	0	0	0	0.919	0	0	0	0	0	0	0	0	0	0	0	0	0	0	0	0	0	0	0	0	0	0	0	0	0	0	0	8.73
13.181	1.1486	0	0	0	0	0	0	0	0	0	0	0	0.6892	0	0.23	0	0	0	0	0	0.689	0	0	0	0	0	0	0	0	0	0	0	0	0	0	0	0	0	0	0	0	0	0	0	0	0	0	0	8.959
13.1904	1.3784	0	0	0	0	0	0	0	0	0	0	0	1.1486	0	0	0	0	0	0	0	0.459	0	0	0	0	0	0	0	0	0	0	0	0	0	0	0	0	0	0	0	0	0	0	0	0	0	0	0	8.041
13.1997	1.8378	0	0	0	0	0	0	0	0	0	0	0	0.9189	0	0.23	0	0	0	0	0	0.919	0	0	0	0	0	0	0	0	0	0	0	0	0	0	0	0	0	0	0	0	0	0	0	0	0	0	0	7.811
13.2091	0.6892	0	0	0	0	0	0	0	0	0	0	0	0.6892	0	0.23	0	0	0	0	0	0.919	0	0	0	0	0	0	0	0	0	0	0	0	0	0	0	0	0	0	0	0	0	0	0	0	0	0	0	8.27
13.2185	0.2297	0	0	0	0	0	0	0	0	0	0	0	0.2297	0	0	0	0	0	0	0	0.689	0	0	0	0	0	0	0	0	0	0	0	0	0	0	0	0	0	0	0	0	0	0	0	0	0	0	0	7.581
13.2279	0.2297	0	0	0	0	0	0	0	0	0	0	0	0.6892	0	0	0	0	0	0	0	0.459	0	0	0	0	0	0	0	0	0	0	0	0	0	0	0	0	0	0	0	0	0	0	0	0	0	0	0	7.811
13.2372	0.6892	0	0	0	0	0	0	0	0	0	0	0	0.2297	0	0	0	0	0	0	0	0.689	0	0	0	0	0	0	0	0	0	0	0	0	0	0	0	0	0	0	0	0	0	0	0	0	0	0	0	7.351
13.2466	1.3784	0	0	0	0	0	0	0	0	0	0	0	0	0	0	0	0	0	0	0	0.919	0	0	0	0	0	0	0	0	0	0	0	0	0	0	0	0	0	0	0	0	0	0	0	0	0	0	0	6.203
13.256	1.3784	0	0	0	0	0	0	0	0	0	0	0	0.4595	0	0	0	0	0	0	0	0.919	0	0	0	0	0	0	0	0	0	0	0	0	0	0	0	0	0	0	0	0	0	0	0	0	0	0	0	5.514
13.2654	0.4595	0	0	0	0	0	0	0	0	0	0	0	0	0	0	0	0	0	0	0	0.919	0	0.2297	0	0	0	0	0	0	0	0	0	0	0	0	0	0	0	0	0	0	0	0	0	0	0	0	0	6.432
13.2747	0.2297	0	0	0	0	0	0	0	0	0	0	0	0	0	0	0	0	0	0	0	1.608	0	0.2297	0	0	0	0	0	0	0	0	0	0	0	0	0	0	0	0	0	0	0	0	0	0	0	0	0	6.662
13.2841	0.2297	0	0	0	0	0	0	0	0	0	0	0	0	0	0	0	0	0	0	0	0.919	0	0.4595	0	0	0	0	0	0	0	0	0	0	0	0	0	0	0	0	0	0	0	0	0	0	0	0	0	5.743
13.2935	0.4595	0	0	0	0	0	0	0	0	0	0	0	0	0	0	0	0	0	0	0	0.689	0	0.2297	0	0	0	0	0	0	0	0	0	0	0	0	0	0	0	0	0	0	0	0	0	0	0	0	0	5.743
13.3029	0.4595	0	0	0	0	0	0	0	0	0	0	0	0	0	0	0	0	0	0	0	0.459	0	0.2297	0	0	0	0	0	0	0	0	0	0	0	0	0	0	0	0	0	0	0	0	0	0	0	0	0	5.284
13.3122	0	0	0	0	0	0	0	0	0	0	0	0	0	0	0	0	0	0	0	0	0.689	0	0.4595	0	0	0	0	0	0	0	0	0	0	0	0	0	0	0	0	0	0	0	0	0	0	0	0	0	6.203
13.3216	0	0	0	0	0	0	0	0	0	0	0	0	0	0	0	0	0	0	0	0	0.459	0	0.4595	0	0	0	0	0	0	0	0	0	0	0	0	0	0	0	0	0	0	0	0	0	0	0	0	0	6.662
13.331	0.4595	0	0	0	0	0	0	0	0	0	0	0	0	0	0	0	0	0	0	0	0.689	0	0.2297	0	0	0	0	0	0	0	0	0	0	0	0	0	0	0	0	0	0	0	0	0	0	0	0	0	7.122
13.3404	1.1486	0	0	0	0	0	0	0	0	0	0	0	0.6892	0	0	0	0	0	0	0	0.689	0	0	0	0	0	0	0	0	0	0	0	0	0	0	0	0	0	0	0	0	0	0	0	0	0	0	0	6.892
13.3497	0.9189	0	0	0	0	0	0	0	0	0	0	0	0.9189	0	0	0	0	0	0	0	2.757	0	0.2297	0	0	0	0	0	0	0	0	0	0	0	0	0	0	0	0	0	0	0	0	0	0	0	0	0	6.662
13.3591	0.6892	0	0	0	0	0	0	0	0	0	0	0	1.3784	0	0	0	0.23	0	0	0	3.676	0	0	0	0	0	0	0	0	0	0	0	0	0	0	0	0	0	0	0	0	0	0	0	0	0	0	0	6.432
13.3685	0.6892	0	0	0	0	0	0	0	0	0	0	0	1.3784	0	0	0	0.23	0	0	0	3.216	0	0	0	0	0	0	0	0	0	0	0	0	0	0	0	0	0	0	0	0	0	0	0	0	0	0	0	6.662
13.3779	0.2297	0	0	0	0	0	0	0	0	0	0	0	1.3784	0	0	0	0.689	0	0	0	2.527	0	0	0	0	0	0	0	0	0	0	0	0	0	0	0	0	0	0	0	0	0	0	0	0	0	0	0	6.892
13.3872	0	0	0	0	0	0	0	0	0	0	0	0	0.4595	0	0	0	0.459	0	0	0	0.459	0	0	0	0	0	0	0	0	0	0	0	0	0	0	0	0	0	0	0	0	0	0	0	0	0	0	0	6.892
13.3966	0.2297	0	0	0	0	0	0	0	0	0	0	0	1.1486	0	0	0	0.689	0	0	0	0.459	0	0	0	0	0	0	0	0	0	0	0	0	0	0	0	0	0	0	0	0	0	0	0	0	0	0	0	5.743
13.406	0.6892	0	0	0	0	0	0	0	0	0	0	0	0.9189	0	0	0	0.919	0	0	0	0.919	0	0.2297	0	0	0	0	0	0	0	0	0	0	0	0	0	0	0	0	0	0	0	0	0	0	0	0	0	5.973
13.4154	0.4595	0	0	0	0	0	0	0	0	0	0	0	0	0	0	0	0.459	0	0	0	0.689	0	0.4595	0	0	0	0	0	0	0	0	0	0	0	0	0	0	0	0	0	0	0	0	0	0	0	0	0	6.203
13.4247	0	0	0	0	0	0	0	0	0	0	0	0	0	0	0	0	0.459	0	0	0	1.149	0	0.4595	0.2297	0	0	0	0	0	0	0	0	0	0	0	0	0	0	0	0	0	0	0	0	0	0	0	0	5.973
13.4341	0	0	0	0	0	0	0	0	0	0	0	0	0	0	0	0	0.689	0	0	0	2.068	0	0.4595	0.4595	0	0	0	0	0	0	0	0	0	0	0	0	0	0	0	0	0	0	0	0	0	0	0	0	5.514
13.4435	0	0	0	0	0	0	0	0	0	0	0	0	0.2297	0	0	0	0.689	0	0	0	4.135	0	0.2297	0.6892	0	0	0	0	0	0	0	0	0	0	0	0	0	0	0	0	0	0	0	0	0	0	0	0	5.054
13.4529	0	0	0	0	0	0	0	0	0	0	0	0	0.2297	0	0	0	0.23	0	0	0	5.054	0	0	0.6892	0	0	0	0	0	0	0	0	0	0	0	0	0	0	0	0	0	0	0	0	0	0	0	0	4.824
13.4622	0	0	0	0	0	0	0	0	0	0	0	0	0.2297	0	0	0	0	0	0	0	4.135	0	0	0.2297	0	0	0	0	0	0	0	0	0	0	0	0	0	0	0	0	0	0	0	0	0	0	0	0	4.824
13.4716	0	0	0	0.23	0	0	0	0	0	0	0	0	0	0	0	0	0	0	0	0	3.216	0	0.2297	0	0	0	0	0	0	0	0	0	0	0	0	0	0	0	0	0	0	0	0	0	0	0	0	0	4.595
13.481	0	0	0	0	0	0	0	0	0	0	0	0	0.2297	0	0	0	0.23	0	0	0	1.149	0	0.4595	0	0	0	0	0	0	0	0	0	0	0	0	0	0	0	0	0	0	0	0	0	0	0	0	0	5.743
13.4904	0	0	0	0	0	0	0	0	0	0	0	0	0.2297	0	0	0	0.23	0	0	0	0.459	0	0.4595	0	0	0	0	0	0	0	0	0	0	0	0	0	0	0	0	0	0	0	0	0	0	0	0	0	6.203
13.4997	0	0	0	0	0	0	0	0	0	0	0	0	0.9189	0	0	0	0	0	0	0	0	0	0.2297	0	0	0	0	0	0	0	0	0	0	0	0	0	0	0	0	0	0	0	0	0	0	0	0	0	6.203
13.5091	0	0	0	0	0	0	0	0	0	0	0	0	2.527	0	0	0	0	0	0	0	0.459	0	0.2297	0	0	0	0	0	0	0	0	0	0	0	0	0	0	0	0	0	0	0	0	0	0	0	0	0	5.973
13.5185	0	0	0	0	0	0	0	0	0	0	0	0	2.2973	0	0	0	0.23	0	0	0	0.689	0	0	0	0	0	0	0	0	0	0	0	0	0	0	0	0	0	0	0	0	0	0	0	0	0	0	0	5.973
13.5279	0	0	0	0	0	0	0	0	0	0	0	0	2.2973	0.23	0	0	0.23	0	0	0	0.459	0	0	0	0	0	0	0	0	0	0	0	0	0	0	0	0	0	0	0	0	0	0	0	0	0	0	0	5.284
13.5372	0	0	0	0	0	0	0	0	0	0	0	0	2.0676	0.23	0	0	0	0	0	0	0.23	0	0	0	0	0	0	0	0	0	0	0	0	0	0	0	0	0	0	0	0	0	0	0	0	0	0	0	5.514
13.5466	0	0	0	0	0	0	0	0	0	0	0	0	2.0676	0.23	0	0	0.459	0.2297	0	0	0.23	0	0	0	0	0	0	0	0	0	0	0	0	0	0	0	0	0	0	0	0	0	0	0	0	0	0	0	5.514
13.556	0	0	0	0	0	0	0	0	0	0	0	0	1.6081	0	0	0	0.459	0	0	0	0.23	0	0	0	0	0	0	0	0	0	0	0	0	0	0	0	0	0	0	0	0	0	0	0	0	0	0	0	5.284
13.5654	0	0	0	0	0	0	0	0	0	0	0	0	2.2973	0	0	0	0.23	0	0	0	0.23	0	0	0	0	0	0	0	0	0	0	0	0	0	0	0	0	0	0	0	0	0	0	0	0	0	0	0	5.284
13.5747	0	0	0	0	0	0	0	0	0	0	0	0	2.7568	0	0	0	0	0	0	0.2297	0.689	0	0	0	0	0	0	0	0	0	0	0	0	0	0	0	0	0	0	0	0	0	0	0	0	0	0	0	5.284
13.5841	0	0	0	0	0	0	0	0	0	0	0	0	3.6757	0	0	0	0	0	0	0	0.459	0	0	0	0	0	0	0	0	0	0	0	0	0	0	0	0	0	0	0	0	0	0	0	0	0	0	0	4.135
13.5935	0	0	0	0	0	0	0	0	0	0	0	0	3.4459	0	0	0	0	0	0	0	0.459	0	0.2297	0	0	0	0	0	0	0	0	0	0	0	0	0	0	0	0	0	0	0	0	0	0	0	0	0	4.365
13.6029	0	0	0	0	0	0	0	0	0	0	0	0	2.7568	0	0	0.23	0	0	0	0	0.919	0	0.2297	0	0	0	0	0	0	0	0	0	0	0.23	0	0	0	0	0	0	0	0	0	0	0	0	0	0	4.135
13.6122	0	0	0	0	0	0	0	0	0	0	0	0	1.6081	0	0	0.459	0	0	0	0	1.149	0	0.4595	0	0	0	0	0	0	0	0	0	0	0	0	0	0	0	0	0	0	0	0	0	0	0	0	0	3.446
13.6216	0	0	0	0	0	0	0	0	0	0	0	0	1.8378	0	0	0.23	0	0	0	0	0.689	0	0.6892	0.2297	0	0	0	0	0	0	0	0	0	0	0	0	0	0	0	0	0	0	0	0	0	0	0	0	3.676
13.631	0	0	0	0	0	0	0	0	0	0	0	0	1.6081	0	0	0	0	0	0	0	0.689	0	0.6892	0.2297	0	0	0	0	0	0	0	0	0	0	0	0	0	0	0	0	0	0	0	0	0	0	0	0	2.297
13.6404	0	0	0	0	0	0	0	0	0	0	0	0	1.3784	0	0	0	0	0	0	0	0.689	0	0.4595	0.6892	0	0	0	0	0	0	0	0	0	0	0	0	0	0	0	0	0	0	0	0	0	0	0	0	2.297
13.6497	0	0	0	0	0	0	0	0	0	0	0	0	0.2297	0	0	0	0	0	0	0	0.689	0	0	1.1486	0	0	0	0	0	0	0	0	0	0	0	0	0	0	0	0	0	0	0	0	0	0	0	0	1.149
13.6591	0	0	0	0	0	0	0	0	0	0	0	0	0	0	0	0	0	0.2297	0	0	0.459	0	0	0.9189	0	0	0	0	0	0	0	0	0	0	0	0	0	0	0	0	0	0	0	0	0	0	0	0	0.689
13.6685	0	0	0	0	0	0.4595	0	0	0	0	0	0	0	0	0	0	0	0.6892	0	0	0.459	0	0	0.4595	0	0	0	0	0	0	0	0	0	0	0	0	0	0	0	0	0	0	0	0	0	0	0	0	0.689
13.6779	0.2297	0	0	0	0	0.4595	0	0	0	0	0	0	0	0	0	0	0.459	0.4595	0	0	0.689	0	0	1.3784	0	0	0	0	0	0	0	0	0	0	0	0	0	0	0	0	0	0	0	0	0	0	0	0	1.149
13.6872	0	0	0	0	0	0	0	0	0	0	0	0	0	1.149	0	0	0.459	0.6892	0	0	0.689	0	0	1.3784	0	0	0	0	0	0	0	0	0	0	0	0	0	0	0	0	0	0	0	0	0	0	0	0	0.919
13.6966	0.2297	0	0	0	0	0	0	0	0	0	0	0	0	2.068	0	0	0	0.2297	0	0	0.23	0	0	1.6081	0	0	0	0	0	0	0	0	0	0	0	0	0	0	0	0	0	0	0	0	0	0	0	0	1.378
13.706	0	0	0	0	0	0	0	0	0	0	0	0	0	2.297	0	0	0	0	0	0	0.919	0	0	2.527	0	0	0	0	0	0	0	0	0	0	0	0	0	0	0	0	0	0	0	0	0	0	0	0	2.068
13.7154	0	0	0	0	0	0	0	0	0	0	0	0	0	2.986	0	0	0	0	0	0	1.608	0	0	3.2162	0	0	0	0	0	0	0	0	0	0	0	0	0	0	0	0	0	0	0	0	0	0	0	0	2.757
13.7247	0	0	0	0	0	0	0	0	0	0	0	0	0	2.527	0	0	0	0	0	0	1.838	0	0	3.6757	0	0	0	0	0	0	0	0	0	0	0	0	0	0	0	0	0	0	0	0	0	0	0	0	2.297
13.7341	0	0	0	0	0	0	0	0	0	0	0	0	0	2.757	0	0	0	0	0	0	1.149	0	0	3.6757	0	0	0	0	0	0	0	0	0	0	0	0	0	0	0	0	0	0	0	0	0	0	0	0	1.378
13.7435	0	0	0	0	0	0	0	0	0	0	0	0	0	2.527	0	0	0.23	0	0	0	0.689	0	0.2297	3.2162	0	0	0	0	0	0	0	0	0	0	0	0	0	0	0	0	0	0	0	0	0	0	0	0	1.378
13.7529	0	0	0	0	0	0	0	0	0	0	0	0	0	2.757	0	0	0.23	0	0	0	0.919	0	0.4595	5.0541	0	0	0	0	0	0	0	0	0	0	0	0	0	0	0	0	0	0	0	0	0	0	0	0	0.919
13.7622	0	0	0	0	0	0	0	0	0	0	0	0	0	2.068	0	0	0.459	0	0	0	0.919	0	0.6892	4.3649	0	0	0	0	0	0	0	0	0	0	0	0	0	0	0	0	0	0	0	0	0	0	0	0	1.608
13.7716	0.2297	0	0	0	0	0	0	0	0	0	0	0	0	2.297	0	0	0.23	0	0	0	1.149	0	0.4595	5.2838	0	0	0	0	0	0	0	0	0	0	0	0	0	0	0	0	0	0	0	0	0	0	0	0	1.378
13.781	0	0	0	0	0	0	0	0	0	0	0	0	0	2.297	0	0	0.23	0	0	0	0.919	0	0.2297	4.3649	0	0	0	0	0	0	0	0	0	0	0	0	0	0	0	0	0	0	0	0	0	0	0	0	1.838
13.7904	0	0	0	0	0	0	0	0	0	0	0	0	0	1.608	0	0	0.689	0	0	0	0.919	0	0.4595	4.3649	0	0	0	0	0	0	0	0	0	0	0	0	0	0	0	0	0	0	0	0	0	0	0	0	1.838
13.7997	0	0	0	0	0	0	0	0	0	0	0	0	0	0.459	0	0	0.919	0	0	0	0.459	0	0	3.9054	0	0	0	0	0	0	0	0	0	0	0	0	0	0	0	0	0	0	0	0	0	0	0	0	1.608
13.8091	0	0	0	0	0	0	0	0	0	0	0	0	0	0	0	0	1.149	0	0	0	0.919	0	0	2.9865	0	0	0	0	0	0	0	0	0	0	0	0	0	0	0	0	0	0	0	0	0	0	0	0	1.149
13.8185	0	0	0	0	0.23	0	0	0	0	0	0	0	0	0	0	0	1.378	0	0	0	1.608	0	0	3.2162	0	0	0	0	0	0	0	0	0	0	0	0	0	0	0	0	0	0	0	0	0	0	0	0	0.919
13.8279	0.2297	0	0	0	0.459	0	0	0	0	0	0	0	0.2297	0	0	0	0.459	0	0	0	1.608	0	0	2.9865	0	0	0	0	0	0	0	0	0	0	0	0	0	0	0	0	0	0	0	0	0	0	0	0	0.23
13.8372	0.4595	0	0	0	0.23	0	0	0	0	0	0	0	0	0	0	0	0	0	0	0	0.919	0	0.4595	3.2162	0	0	0	0	0	0	0	0	0	0	0	0	0	0	0	0	0	0	0	0	0	0	0	0	0
13.8466	0.9189	0	0	0	0.23	0	0	0	0	0	0	0	0	0	0	0	0.459	0	0	0	0.459	0	0.2297	3.9054	0	0	0	0	0	0	0	0	0	0	0	0	0	0	0	0	0	0	0	0	0	0	0	0	0
13.856	1.3784	0	0	0	0.459	0	0	0	0	0	0	0	0	0	0	0	0.689	0	0	0	0.459	0	0.2297	3.6757	0	0	0	0	0	0	0	0	0	0	0	0	0	0	0	0	0	0	0	0	0	0	0	0	0
13.8654	1.8378	0	0	0	0.459	0	0	0	0	0	0	0	0.2297	0.23	0	0	0.919	0	0	0	0.919	0	0.2297	4.3649	0	0	0	0	0	0	0	0	0	0	0	0	0	0	0	0	0	0	0	0	0	0	0	0	0
13.8747	1.3784	0	0	0	0	0	0	0	0	0	0	0	0	0	0	0	1.149	0	0	0	1.149	0	0	4.1351	0	0	0	0	0	0	0	0	0	0	0	0	0	0	0	0	0	0	0	0	0	0	0	0	0
13.8841	1.3784	0	0	0	0	0	0	0	0	0	0	0	0	0	0	0	0.919	0	0	0	1.608	0	0	4.1351	0	0	0	0	0	0	0	0	0	0	0	0	0	0	0	0	0	0	0	0	0	0	0	0	0
13.8935	1.1486	0	0	0	0	0	0	0	0	0	0	0	0	0	0	0	0.459	0	0	0	1.149	0	0	4.1351	0	0	0	0	0	0	0	0	0	0	0	0	0	0	0	0	0	0	0	0	0	0	0	0	0
13.9029	0.4595	0	0	0	0	0	0	0	0	0	0	0	0	0	0	0	0.23	0	0	0	0.919	0	0	4.5946	0	0	0	0	0	0	0	0	0	0	0	0	0	0	0	0	0	0	0	0	0	0	0	0	0
13.9122	0	0	0	0	0	0	0	0	0	0	0	0	0	0	0	0	0	0	0	0	0.919	0	0	4.5946	0	0	0	0	0	0	0	0	0	0	0	0	0	0	0	0	0	0	0	0	0	0	0	0	0
13.9216	0	0	0	0	0	0	0	0	0	0	0	0	0	0	0	0	1.149	0	0	0	1.149	0	0	4.5946	0	0	0	0	0	0	0	0	0	0	0	0	0	0	0	0	0	0	0	0	0	0	0	0	0.459
13.931	0.4595	0	0	0	0	0	0	0	0	0	0	0	0	0	0	0	0.919	0	0	0	0.459	0	0	3.6757	0	0	0	0	0	0	0	0	0	0	0	0	0	0	0	0	0	0	0	0	0	0	0	0	0.689
13.9404	0.2297	0	0	0	0	0	0	0	0	0	0	0	0	0	0	0	0.689	0	0	0	0.689	0	0	3.2162	0	0	0	0	0	0	0	0	0	0	0	0	0	0	0	0	0	0	0	0	0	0	0	0	0.23
13.9497	0	0	0	0	0	0	0	0	0	0	0	0	0.2297	0	0	0	0	0	0	0	0.919	0	0	3.2162	0	0	0	0	0	0	0	0	0	0	0	0	0	0	0	0	0	0	0	0	0	0	0	0	0.23
13.9591	0	0	0	0	0	0	0	0	0	0	0	0	0.2297	0	0	0	0	0	0	0	0.919	0	0	4.5946	0	0	0	0	0	0	0	0	0	0	0	0	0	0	0	0	0	0	0	0	0	0	0	0	0
13.9685	0	0	0	0	0	0	0	0	0	0	0	0	0.2297	0	0	0	0	0	0	0	0.919	0	0	4.1351	0	0	0	0	0	0	0	0	0	0	0	0	0	0	0	0	0	0	0	0	0	0	0	0	0
13.9779	0	0	0	0	0	0	0	0	0	0	0	0	0	0	0	0	0	0	0	0	0.689	0	0	4.5946	0	0	0	0	0	0	0	0	0	0	0	0	0	0	0	0	0	0	0	0	0	0	0	0	0
13.9872	0	0	0	0	0	0	0	0	0	0	0	0	0	0	0	0	0	0	0	0	1.149	0	0	3.9054	0	0	0	0	0	0	0	0	0	0	0	0	0	0	0	0	0	0	0	0	0	0	0	0	0.459
13.9966	0	0	0	0	0	0	0	0	0	0	0	0	0	0	0	0	0	0	0	0	1.838	0	0	3.9054	0	0	0	0	0	0	0	0	0	0	0	0	0	0	0	0.23	0	0	0	0	0	0	0	0	0.23
14.006	0	0	0	0	0	0	0	0	0	0	0	0	0.2297	0	0	0	0	0	0	0	1.608	0	0	4.5946	0	0	0	0	0	0	0	0	0	0	0	0	0	0	0	0.459	0	0	0	0	0	0	0	0	0
14.0154	0	0	0	0	0	0	0	0	0	0	0	0	0	0	0	0	0.23	0	0	0	1.378	0	0	4.5946	0	0	0	0	0	0	0	0	0	0	0	0	0	0	0	0	0	0	0	0	0	0	0	0	0
14.0247	0	0	0	0	0	0	0	0	0	0	0	0	0	0	0	0	0.919	0	0	0	1.149	0	0	4.3649	0	0	0	0	0	0	0	0	0	0	0	0	0	0	0	0	0	0	0	0	0	0	0	0	0
14.0341	0	0	0	0	0	0	0	0	0	0	0	0	0	0	0	0	1.149	0	0	0	0.689	0	0	3.6757	0	0	0	0	0	0	0	0	0	0	0	0	0	0	0	0	0	0	0	0	0	0	0	0	0
14.0435	0.4595	0	0	0	0	0	0	0	0	0	0	0	0	0	0	0	1.838	0	0	0	0.23	0	0	3.2162	0	0	0	0	0	0	0	0	0	0	0	0	0	0	0	0	0	0	0	0	0	0	0	0	0
14.0529	1.1486	0	0	0	0	0	0	0	0	0	0	0	0	0	0	0	1.838	0	0	0	0.459	0	0	2.527	0	0	0	0	0	0	0	0	0	0	0	0	0	0	0	0	0	0	0	0	0	0	0	0	0
14.0622	1.6081	0	0	0	0	0	0	0	0	0	0	0	0	0	0	0	1.149	0	0	0	0.919	0	0	2.0676	0	0	0	0	0	0	0	0	0	0	0	0	0	0	0	0	0	0	0	0	0	0	0	0	0
14.0716	1.8378	0	0	0	0	0	0	0	0	0	0	0	0	0	0	0	0.459	0	0	0	1.378	0	0	1.3784	0	0	0	0	0	0	0	0	0	0	0	0	0	0	0	0	0	0	0	0	0	0	0	0	0
14.081	2.0676	0	0	0	0	0	0	0	0	0	0	0	0	0	0	0	0	0	0	0	2.068	0	0.6892	1.1486	0	0	0	0	0	0	0	0	0	0	0	0	0	0	0	0	0	0	0	0	0	0	0	0	0
14.0904	1.6081	0	0	0	0	0	0	0	0	0	0	0	0	0	0	0	0	0	0	0	2.068	0	0.9189	1.3784	0	0	0	0	0	0	0	0	0	0	0	0	0	0	0	0	0	0	0	0	0	0	0	0	0
14.0997	1.8378	0	0	0	0	0	0	0	0	0	0	0	0.2297	0	0	0	0	0	0	0	2.068	0	0.6892	1.8378	0	0	0	0	0	0	0	0	0	0	0	0	0	0	0	0	0	0	0	0	0	0	0	0	0.23
14.1091	2.0676	0	0	0	0	0	0	0	0	0	0	0	0.6892	0	0	0	0.459	0	0	0	2.297	0	0.6892	2.0676	0	0	0	0	0	0	0	0	0	0	0	0	0	0	0	0	0	0	0	0	0	0	0	0	0.459
14.1185	1.8378	0	0	0	0	0	0	0	0	0	0	0	0.2297	0	0	0	0.459	0	0	0	1.838	0	1.1486	1.8378	0	0	0	0	0	0	0	0	0	0	0	0	0	0	0	0	0	0	0	0	0	0	0	0	0.459
14.1278	1.1486	0	0	0	0	0	0	0	0	0	0	0	0	0	0	0	0.689	0	0	0	1.149	0	0.9189	1.8378	0	0	0	0	0	0	0	0	0	0	0	0	0	0	0	0	0	0	0	0	0	0	0	0	0.23
14.1372	0.6892	0	0	0	0	0	0	0	0	0	0	0	0	0	0	0	0.459	0	0	0	0.689	0	0.6892	0.9189	0	0	0	0	0	0	0	0	0	0	0	0	0	0	0	0	0	0	0	0	0	0	0	0	0.459
14.1466	0.4595	0	0	0	0	0	0	0	0	0	0	0	0	0	0	0	0.459	0	0	0	0.23	0	0	1.1486	0	0	0	0	0	0	0	0	0	0	0	0	0	0	0	0	0	0	0	0	0	0	0	0	0.459
14.156	0.2297	0	0	0	0	0	0	0	0	0	0	0	0	0	0	0	0	0	0	0	0	0	0	1.1486	0	0	0	0	0	0	0	0	0	0	0	0	0	0	0	0	0	0	0	0	0	0	0	0	0.459
14.1653	0	0	0	0	0	0	0	0	0	0	0	0	0	0	0	0	0.23	0	0	0	0	0	0	1.1486	0	0	0	0	0	0	0	0	0	0	0	0	0	0	0	0	0	0	0	0	0	0	0	0	0.23
14.1747	0	0	0	0	0	0	0	0	0	0	0	0	0	0	0	0	0.23	0	0	0	0.23	0	0	1.1486	0	0	0	0	0	0	0	0	0	0	0	0	0	0	0	0	0	0	0	0	0	0	0	0	0.23
14.1841	0	0	0	0	0	0	0	0	0	0	0	0	0	0	0	0	0.919	0	0	0	0.23	0	0	0.9189	0	0	0	0	0	0	0	0	0	0	0	0	0	0	0	0	0	0	0	0	0	0	0	0	0.23
14.1935	0	0	0	0	0	0	0	0	0	0	0	0	0	0	0	0	1.149	0	0	0	0.459	0	0.2297	1.1486	0	0	0	0	0	0	0	0	0	0	0	0	0	0	0	0	0	0	0	0	0	0	0	0	0.459
14.2028	0	0	0	0	0	0	0	0	0	0	0	0	0	0	0	0	1.149	0	0	0	0.689	0	0	1.1486	0	0	0	0	0	0	0	0	0	0	0	0	0	0	0	0	0	0	0	0	0	0	0	0	0.919
14.2122	0	0	0	0	0	0	0	0	0	0	0	0	0	0	0	0	0.919	0	0	0	0.23	0	0	0.6892	0	0	0	0	0	0	0	0	0	0	0	0	0	0	0	0	0	0	0	0	0	0	0	0	1.149
14.2216	0	0	0	0	0	0	0	0	0	0	0	0	0	0	0	0	0.459	0	0	0	0.23	0	0	1.3784	0	0	0	0	0	0	0	0	0	0	0	0	0	0	0	0	0	0	0	0	0	0	0	0	1.149
14.231	0	0	0	0	0	0	0	0	0	0	0	0	0	0	0	0	0.23	0	0	0	0.23	0	0	0.9189	0	0	0	0	0	0	0	0	0	0	0	0	0	0	0	0	0	0	0	0	0	0	0	0	1.378
14.2403	0	0	0	0	0	0	0	0	0	0	0	0	0	0	0	0	0.689	0	0	0	0	0	0	1.8378	0	0	0	0	0	0	0	0	0	0	0	0	0	0	0	0	0	0	0	0	0	0	0	0	2.068
14.2497	0	0	0	0	0	0	0	0	0	0	0	0	0	0	0	0	0.459	0	0	0	0	0	0	1.3784	0	0	0	0	0	0	0	0	0	0	0	0	0	0	0	0	0	0	0	0	0	0	0	0	3.446
14.2591	0	0	0	0	0	0	0	0	0	0	0	0	0.4595	0	0	0	0.689	0	0	0	0	0	0	0.9189	0	0	0	0	0	0	0	0	0	0	0	0	0	0	0	0	0	0	0	0	0	0	0	0	3.905
14.2685	0.2297	0	0	0	0	0	0	0	0	0	0	0	0	0	0	0	0.459	0	0	0	0	0	0	0.9189	0	0	0	0	0	0	0	0	0	0	0	0	0	0	0	0	0	0	0	0	0	0	0	0	4.595
14.2778	1.1486	0	0	0	0	0	0	0	0	0	0	0	0	0	0	0	0.459	0	0	0	0	0	0	0.9189	0	0	0	0	0	0	0	0	0	0	0	0	0	0	0	0	0	0	0	0	0	0	0	0	5.054
14.2872	1.1486	0	0	0	0	0	0	0	0	0	0	0	0	0	0	0	0	0	0	0	0	0	0	0.2297	0	0	0	0	0	0	0	0	0	0	0	0	0	0	0	0	0	0	0	0	0	0	0	0	5.284
14.2966	1.1486	0	0	0	0	0	0	0	0	0	0	0	0	0	0	0	0.23	0	0	0	0	0	0	0.9189	0	0	0	0	0	0	0	0	0	0	0	0	0	0	0	0	0	0	0	0	0	0	0	0	5.514
14.306	0.6892	0	0	0	0	0	0	0	0	0	0	0	0	0	0	0	0.23	0	0	0	0	0	0	0.6892	0	0	0	0	0	0	0	0	0	0	0	0	0	0	0	0	0	0	0	0	0	0	0	0	4.595
14.3153	0.4595	0	0	0.23	0	0	0	0	0	0	0	0	0.2297	0	0	0	0.23	0	0	0	0	0	0	0.4595	0	0	0	0	0	0	0	0	0	0	0	0	0	0	0	0	0	0	0	0	0	0	0	0	3.905
14.3247	0	0	0	0.23	0	0	0	0	0	0	0	0	0.2297	0	0	0	0.459	0	0	0	0	0	0	0	0	0	0	0	0	0	0	0	0	0	0	0	0	0	0	0	0	0	0	0	0	0	0	0	4.595
14.3341	0	0	0	0.23	0	0	0	0	0	0	0	0	0	0	0	0	0.459	0	0	0	0	0	0	0	0	0	0	0	0	0	0	0	0	0	0	0	0	0	0	0	0	0	0	0	0	0	0	0	4.365
14.3435	0.4595	0	0	0	0	0	0	0	0	0	0	0	0	0	0	0	0.689	0	0	0	0	0	0	0	0	0	0	0	0	0	0	0	0	0	0	0	0	0	0	0	0	0	0	0	0	0	0	0	4.595
14.3528	0.6892	0	0	0	0	0	0	0	0	0	0	0	0	0	0	0	0.459	0	0	0	0	0	0	0	0	0	0	0	0	0	0	0	0	0	0	0	0	0	0	0	0	0	0	0	0	0	0	0	5.284
14.3622	0.4595	0	0	0	0	0	0	0	0	0	0	0	0	0	0	0	0.23	0	0	0	0.23	0	0.4595	0	0	0	0	0	0	0	0	0	0	0	0	0	0	0	0	0	0	0	0	0	0	0	0	0	5.054
14.3716	0.6892	0	0	0	0	0	0	0	0	0	0	0	0	0	0	0	0	0	0	0	1.378	0	0.2297	0.2297	0	0	0	0	0	0	0	0	0	0	0	0	0	0	0	0	0	0	0	0	0	0	0	0	5.514
14.381	0.6892	0	0	0	0	0	0	0	0	0	0	0	0.2297	0	0	0	0	0	0	0	1.838	0	0.2297	0.2297	0	0	0	0	0	0	0	0	0	0	0	0	0	0	0	0	0	0	0	0	0	0	0	0	6.432
14.3903	0	0	0	0	0	0	0	0	0	0	0	0	0	0	0	0	0	0	0	0	2.068	0	0.4595	0.2297	0	0	0	0	0	0	0	0	0	0	0	0	0	0	0	0	0	0	0	0	0	0	0	0	6.892
14.3997	0	0	0	0	0	0	0	0	0	0	0	0	0	0	0	0	0.459	0	0	0	2.297	0	0.2297	0.6892	0	0	0	0	0	0	0	0	0	0	0	0	0	0	0	0	0	0	0	0	0	0	0	0	6.892
14.4091	0	0	0	0	0	0	0	0	0	0	0	0	0	0	0	0	0.689	0	0	0	1.608	0	0.2297	0.9189	0	0	0	0	0	0	0	0	0	0	0	0	0	0	0	0	0	0	0	0	0	0	0	0	6.432
14.4185	0	0	0	0	0	0	0	0	0	0	0	0	0	0	0	0	0.459	0	0	0	0.919	0	0.4595	0.2297	0	0	0	0	0	0	0	0	0	0	0	0	0	0	0	0	0	0	0	0	0	0	0	0	6.892
14.4278	0	0	0	0	0	0	0	0	0	0	0	0	0	0	0	0	0.459	0	0	0	0.459	0	0.2297	0.4595	0	0	0	0	0	0	0	0	0	0	0	0	0	0	0	0	0	0	0	0	0	0	0	0	6.892
14.4372	0	0	0	0	0	0	0	0	0	0	0	0	0	0	0	0	1.378	0	0	0	0.23	0	0	1.1486	0	0	0	0	0	0	0	0	0	0	0	0	0	0	0	0	0	0	0	0	0	0	0	0	7.581
14.4466	0	0	0	0	0	0	0	0	0	0	0	0	0	0	0	0	1.838	0	0	0	0	0	0	0.6892	0	0	0	0	0	0	0	0	0	0	0	0	0	0	0	0	0	0	0	0	0	0	0	0	5.743
14.456	0	0	0	0	0	0	0	0	0	0	0	0	0	0	0	0	1.838	0	0	0	0	0	0	0.6892	0	0	0	0	0	0	0	0	0	0	0	0	0	0	0	0	0	0	0	0	0	0	0	0	5.514
14.4653	0	0	0	0	0	0	0	0	0	0	0	0	0	0	0	0	1.378	0	0	0	0.23	0	0	0.4595	0	0	0	0	0	0	0	0	0	0	0	0	0	0	0	0	0	0	0	0	0	0	0	0	5.743
14.4747	0	0	0	0	0.23	0	0	0	0	0	0	0	0	0	0	0	0.23	0	0	0	0.23	0	0	0	0	0	0	0	0	0	0	0	0	0	0	0	0	0	0	0	0	0	0	0	0	0	0	0	5.743
14.4841	0.6892	0	0	0	0	0	0	0	0	0	0	0	0	0	0	0	0.23	0	0	0	0.919	0	0	0.2297	0	0	0	0	0	0	0	0	0	0	0	0	0	0	0	0	0	0	0	0	0	0	0	0	5.743
14.4935	0.4595	0	0	0	0	0	0	0	0	0	0	0	0.2297	0	0	0	0.459	0	0	0	0.919	0	0	0.2297	0	0	0	0	0	0	0	0	0	0	0	0	0	0	0	0	0	0	0	0	0	0	0	0	5.054
14.5028	0	0	0	0	0.23	0	0	0	0	0	0	0	0.4595	0	0	0	0.689	0	0	0	1.608	0	0	0	0	0	0	0	0	0	0	0	0	0	0	0	0	0	0	0	0	0	0	0	0	0	0	0	5.054
14.5122	0	0	0	0	0.459	0	0	0	0	0	0	0	0.4595	0	0	0	0.919	0	0	0	1.608	0	0	0.2297	0	0	0	0	0	0	0	0	0	0	0	0	0	0	0	0	0	0	0	0	0	0	0	0	4.135
14.5216	0	0	0	0	0.689	0	0	0	0	0	0	0	0	0	0	0	1.378	0	0	0	0.459	0	0	0.2297	0	0	0	0	0	0	0	0	0	0	0	0	0	0	0	0	0	0	0	0	0	0	0	0	3.905
14.531	0	0	0	0	0.23	0	0	0	0	0	0	0	0	0	0	0	1.608	0	0	0	0.23	0	0	0	0	0	0	0	0	0	0	0	0	0	0	0	0	0	0	0	0	0	0	0	0	0	0	0	3.216
14.5403	0	0	0	0	0.23	0	0	0	0	0	0	0	0	0	0	0	1.149	0	0	0	0	0	0.2297	0	0	0	0	0	0	0	0	0	0	0	0	0	0	0	0	0	0	0	0	0	0	0	0	0	2.527
14.5497	0	0	0	0	0.459	0	0	0	0	0	0	0	0	0	0	0	0.919	0	0	0	0	0	0	0	0	0	0	0	0	0	0	0	0	0	0	0	0	0	0	0	0	0	0	0	0	0	0	0	2.757
14.5591	0	0	0	0	0.459	0	0	0	0	0	0	0	0	0	0	0	0.689	0	0	0	0	0	0	0	0	0	0	0	0	0	0	0	0	0	0	0	0	0	0	0	0	0	0	0	0	0	0	0	2.297
14.5685	0	0	0	0	0.689	0	0	0	0	0	0	0	0	0	0	0	0.23	0	0	0	0.459	0	0	0	0	0	0	0	0	0	0	0	0	0	0	0	0	0	0	0	0	0	0	0	0	0	0	0	2.527
14.5778	0	0	0	0	0.689	0	0	0	0	0	0	0	0	0	0	0	0.23	0	0	0	0.23	0	0	0	0	0	0	0	0	0	0	0	0	0	0	0	0	0	0	0	0	0	0	0	0	0	0	0	2.527
14.5872	0	0	0	0	0	0	0	0	0	0	0	0	0	0.23	0	0	0	0	0	0	0	0	0	0	0	0	0	0	0	0	0	0	0	0	0	0	0	0	0	0	0	0	0	0	0	0	0	0	2.068
14.5966	0	0	0	0	0	0	0	0	0	0	0	0	0	0.919	0	0	0	0	0	0	0	0	0.4595	0	0	0	0	0	0	0	0	0	0	0	0	0	0	0	0	0	0	0	0	0	0	0	0	0	1.608
14.606	0	0	0	0	0	0	0	0	0	0	0	0	0.2297	1.149	0	0	0	0	0	0	0.23	0	0	0	0	0	0	0	0	0	0	0	0	0	0	0	0	0	0	0	0	0	0	0	0	0	0	0	2.068
14.6153	0	0	0	0	0	0	0	0	0	0	0	0	0.9189	0.919	0	0	0	0	0	0	0.459	0	0	0	0	0	0	0	0	0	0	0	0	0	0	0	0	0	0	0	0	0	0	0	0	0	0	0	2.297
14.6247	0	0	0	0	0	0	0	0	0	0	0	0	0.4595	0.689	0	0	0	0	0	0	0.459	0	0	0	0	0	0	0	0	0	0	0	0	0	0	0	0	0	0	0	0	0	0	0	0	0	0	0	2.297
14.6341	0	0	0	0	0	0	0	0	0	0	0	0	0	0.919	0	0	0	0	0	0	0.459	0	0	0	0	0	0	0	0	0	0	0	0	0	0	0	0	0	0	0	0	0	0	0	0	0	0	0	1.838
14.6435	0	0	0	0	0	0	0	0	0	0	0	0	0	1.149	0	0	0	0	0	0	0.23	0	0	0	0	0	0	0	0	0	0	0	0	0	0	0	0	0	0	0	0	0	0	0	0	0	0	0	1.608
14.6528	0	0	0	0	0	0	0	0	0	0	0	0	0	1.149	0	0	0	0	0	0	0	0	0	0	0	0	0	0	0	0	0	0	0	0	0	0	0	0	0	0	0	0	0	0	0	0	0	0	1.608
14.6622	0	0	0	0	0	0	0	0	0	0	0	0	0	1.608	0	0	0.23	0	0	0	1.378	0	0	0	0	0	0	0	0	0	0	0	0	0	0	0	0	0	0	0	0	0	0	0	0	0	0	0	1.149
14.6716	0	0	0	0	0	0	0	0	0	0	0	0	0	1.149	0	0	0	0	0	0	2.527	0	0	0	0	0	0	0	0	0	0	0	0	0	0	0	0	0	0	0	0	0	0	0	0	0	0	0	0.459
14.681	0	0	0	0	0	0	0	0	0	0	0	0	0	1.149	0	0	0	0	0	0	1.838	0	0	0	0	0	0	0	0	0	0	0	0	0	0	0	0	0	0	0	0	0	0	0	0	0	0	0	0
14.6903	0	0	0	0	0	0	0	0	0	0	0	0	0	1.149	0	0	0	0	0	0	1.838	0	0	0	0	0	0	0	0	0	0	0	0	0	0	0	0	0	0	0	0	0	0	0	0	0	0	0	0.459
14.6997	0	0	0	0	0	0	0	0	0	0	0	0	0	0.689	0	0	0.23	0	0	0	1.378	0	0	0	0	0	0	0	0	0	0	0	0	0	0	0	0	0	0	0	0	0	0	0	0	0	0	0	0.23
14.7091	0	0	0	0	0	0	0	0	0	0	0	0	0	0.23	0	0	1.149	0	0	0	0.919	0	0	0.2297	0	0	0	0	0	0	0	0	0	0	0	0	0	0	0	0	0	0	0	0	0	0	0	0	0.689
14.7185	0	0	0	0	0	0	0	0	0	0	0	0	0	0	0	0	1.378	0	0	0	0.459	0	0.2297	0	0	0	0	0	0	0	0	0	0	0	0	0	0	0	0	0	0	0	0	0	0	0	0	0	0.459
14.7278	0	0	0	0	0	0	0	0	0	0	0	0	0	0	0	0	1.378	0	0	0	0.459	0	0.2297	0.2297	0	0	0	0	0	0	0	0	0	0	0	0	0	0	0	0	0	0	0	0	0	0	0	0	0.919
14.7372	0	0	0	0	0	0	0	0	0	0	0	0	0	0	0	0	0.459	0	0	0	0.689	0	0	0	0	0	0	0	0	0	0	0	0	0	0	0	0	0	0	0	0	0	0	0	0	0	0	0	1.378
14.7466	0	0	0	0	0	0	0	0	0	0	0	0	0.2297	0	0	0	0.919	0	0	0	0.919	0	0	0	0	0	0	0	0	0	0	0	0	0	0	0	0	0	0	0	0	0	0	0	0	0	0	0	1.608
14.756	0	0	0	0	0	0	0	0	0	0	0	0	0.2297	0	0	0	0.689	0	0	0	0.689	0	0	0	0	0	0	0	0	0	0	0	0	0	0	0	0	0	0	0	0	0	0	0	0	0	0	0	0.919
14.7653	0	0	0	0	0	0	0	0	0	0	0	0	0	0	0	0	0.23	0	0	0	0.689	0	0	0	0	0	0	0	0	0	0	0	0	0	0	0	0	0	0	0	0	0	0	0	0	0	0	0	0.459
14.7747	0	0	0	0	0	0	0	0	0	0	0	0	0.2297	0	0	0	0.459	0	0	0	0.23	0	0	0	0	0	0	0	0	0	0	0	0	0	0	0	0	0	0	0	0	0	0	0	0	0	0	0	0.689
14.7841	0	0	0	0	0	0	0	0	0	0	0	0	0.4595	0	0	0	0.23	0	0	0	0	0	0	0	0	0	0	0	0	0	0	0	0	0	0	0	0	0	0	0	0	0	0	0	0	0	0	0	0.919
14.7935	0	0	0	0	0	0	0	0	0	0	0	0	0.2297	0	0	0	0.919	0	0	0	0.459	0	0	0	0	0	0	0	0	0	0	0	0	0	0	0	0	0	0	0	0	0	0	0	0	0	0	0	0.919
14.8028	0	0	0	0	0	0	0	0	0	0	0	0	0.2297	0	0	0	1.378	0	0	0	0.919	0	0	0	0	0	0	0	0	0	0	0	0	0	0	0	0	0	0	0	0	0	0	0	0	0	0	0	0.919
14.8122	0	0	0	0	0	0	0	0	0	0	0	0	0.4595	0	0	0	1.149	0	0	0	0.689	0	0	0	0	0	0	0	0	0	0	0	0	0	0	0	0	0	0	0	0	0	0	0	0	0	0	0	1.149
14.8216	0.4595	0	0	0	0	0	0	0	0	0	0	0	0.4595	0	0	0	0.919	0	0	0	0.919	0	0	0	0	0	0	0	0	0	0	0	0	0	0	0	0	0	0	0	0	0	0	0	0	0	0	0	1.149
14.831	0.4595	0	0	0	0	0	0	0	0	0	0	0	0.6892	0	0	0	0.459	0	0	0	1.149	0	0	0	0	0	0	0	0	0	0	0	0	0	0	0	0	0	0	0	0	0	0	0	0	0	0	0	1.378
14.8403	0.6892	0	0	0	0	0	0	0	0	0	0	0	0.4595	0	0	0	0.23	0	0	0	0.919	0	0	0	0	0	0	0	0	0	0	0	0	0	0	0	0	0	0	0	0	0	0	0	0	0	0	0	1.149
14.8497	0.9189	0	0	0	0	0	0	0	0	0	0	0	0	0	0	0	0	0	0	0	0.919	0	0	0	0	0	0	0	0	0	0	0	0	0	0	0	0	0	0	0	0	0	0	0	0	0	0	0	1.378
14.8591	1.1486	0	0	0	0	0	0	0	0	0	0	0	0	0	0	0	0	0	0	0.2297	0.919	0	0	0.2297	0	0	0	0	0	0	0	0	0	0	0	0	0	0	0	0	0	0	0	0	0	0	0	0	1.149
14.8685	1.6081	0	0	0	0	0	0	0	0	0	0	0	0	0	0	0	0	0	0	0	0.919	0	0	0.2297	0	0	0	0	0	0	0	0	0	0	0	0	0	0	0	0	0	0	0	0	0	0	0	0	1.378
14.8778	1.3784	0	0	0	0	0	0	0	0	0	0	0	0	0	0	0	0.23	0	0	0	0.689	0	0	0	0	0	0	0	0	0	0	0	0	0	0	0	0	0	0	0	0	0	0	0	0	0	0	0	1.378
14.8872	1.1486	0	0	0	0	0	0	0	0	0	0	0	0	0	0	0	0.459	0	0	0	2.068	0	0	0	0	0	0	0	0	0	0	0	0	0	0	0	0	0	0	0	0	0	0	0	0	0	0	0	1.378
14.8966	1.1486	0	0	0	0	0	0	0	0	0	0	0	0	0	0	0	0.689	0	0	0	1.608	0	0	0	0	0	0	0	0	0	0	0	0	0	0	0	0	0	0	0	0	0	0	0	0	0	0	0	1.378
14.906	0.4595	0	0	0	0	0	0	0	0	0	0	0	0	0	0	0	0.459	0	0	0	2.068	0	0	0	0	0	0	0	0	0	0	0	0	0	0	0	0	0	0	0	0	0	0	0	0	0	0	0	1.608
14.9153	0	0	0	0	0	0	0	0	0	0	0	0	0	0	0	0	0.23	0	0	0	1.149	0	0	0	0	0	0	0	0	0	0	0	0	0	0	0	0	0	0	0	0	0	0	0	0	0	0	0	2.068
14.9247	0	0	0	0	0	0	0	0	0	0	0	0	0	0	0	0	0	0	0	0	0.459	0	0	0	0	0	0	0	0	0	0	0	0	0	0	0	0	0	0	0	0	0	0	0	0	0	0	0	1.608
14.9341	0	0	0	0	0	0	0	0	0	0	0	0	0	0	0	0	0	0	0	0	0	0	0	0	0	0	0	0	0	0	0	0	0	0	0	0	0	0	0	0	0	0	0	0	0	0	0	0	2.527
14.9435	0.4595	0	0	0	0	0	0	0	0	0	0	0	0	0	0	0	0	0	0	0	0	0	0	0	0	0	0	0	0	0	0	0	0	0	0	0	0	0	0	0	0	0	0	0	0	0	0	0	2.297
14.9528	0.2297	0	0	0	0	0	0	0	0	0	0	0	0	0	0	0	0	0	0	0	0	0	0	0	0	0	0	0	0	0	0	0	0	0	0	0	0	0	0	0	0	0	0	0	0	0	0	0	2.527
14.9622	0.2297	0	0	0	0	0	0	0	0	0	0	0	0.2297	0	0	0	0	0	0	0	0	0	0	0	0	0	0	0	0	0	0	0	0	0	0	0	0	0	0	0	0	0	0	0	0	0	0	0	2.527
14.9716	0	0	0	0	0	0	0	0	0	0	0	0	0.4595	0	0	0	0	0	0	0	0	0	0	0	0	0	0	0	0	0	0	0	0	0	0	0	0	0	0	0	0	0	0	0	0	0	0	0	1.608
14.981	0	0	0	0	0	0	0	0	0	0	0	0	0.4595	0	0	0	0	0	0	0	0.459	0	0	0	0	0	0	0	0	0	0	0	0	0	0	0	0	0	0	0	0	0	0	0	0	0	0	0	1.149
14.9903	0.2297	0	0	0	0	0	0	0	0	0	0	0	0.6892	0	0	0	0.23	0	0	0	0.689	0	0	0	0	0	0	0	0	0	0	0	0	0	0	0	0	0	0	0	0	0	0	0	0	0	0	0	0.919
14.9997	0.4595	0	0	0	0	0	0	0	0	0	0	0	0.2297	0	0	0	0.689	0	0	0	1.378	0	0	0	0	0	0	0	0	0	0	0	0	0	0	0	0	0	0	0	0	0	0	0	0	0	0	0	1.149
15.0091	0.4595	0	0	0	0	0	0	0	0	0	0	0	0	0	0	0	1.149	0	0	0	1.838	0	0	0	0	0	0	0	0	0	0	0	0	0	0	0	0	0	0	0	0	0	0	0	0	0	0	0	0.919
15.0185	0.6892	0	0	0	0	0	0	0	0	0	0	0	0	0	0	0	1.149	0	0	0	2.527	0	0	0	0	0	0	0	0	0	0	0	0	0	0	0	0	0	0	0	0	0	0	0	0	0	0	0	0.459
15.0278	0.4595	0	0	0	0	0	0	0	0	0	0	0	0	0	0	0	1.838	0	0	0	2.986	0	0.2297	0	0	0	0	0	0	0	0	0	0	0	0	0	0	0	0	0	0	0	0	0	0	0	0	0	0.919
15.0372	0.4595	0	0	0	0	0	0	0	0	0	0	0	0	0	0	0	1.378	0	0	0	1.838	0	0.6892	0	0	0	0	0	0	0	0	0	0	0	0	0	0	0	0	0	0	0	0	0	0	0	0	0	1.378
15.0466	0.4595	0.23	0	0	0	0	0	0	0	0	0	0	0	0	0	0	1.378	0	0	0	1.838	0	0.6892	0.2297	0	0	0	0	0	0	0	0	0	0	0	0	0	0	0	0	0	0	0	0	0	0	0	0	2.297
15.056	0	0.23	0	0	0	0	0	0	0	0	0	0	0	0	0	0	0.689	0	0	0	1.608	0	0.4595	0	0	0	0	0	0	0	0	0	0	0	0	0	0	0	0	0	0	0	0	0	0	0	0	0	2.757
15.0653	0	0	0	0	0	0	0	0	0	0	0	0	0	0	0	0	0.23	0	0	0	0.919	0	0	0	0	0	0	0	0	0	0	0	0	0	0	0	0	0	0	0	0	0	0	0	0	0	0	0	2.527
15.0747	0	0	0	0	0	0	0	0	0	0	0	0	0	0	0	0	0.689	0.2297	0	0	0.689	0	0	0	0	0	0	0	0	0	0	0	0	0	0	0	0	0	0	0	0	0	0	0	0	0	0	0	2.527
15.0841	0	0	0	0	0	0	0	0	0	0	0	0	0	0	0	0	0.23	0	0	0	0.919	0	0	0	0	0	0	0	0	0	0	0	0	0	0	0	0	0	0	0	0	0	0	0	0	0	0	0	2.297
15.0935	0	0	0	0	0	0	0	0	0	0	0	0	0	0	0	0	0	0	0	0	1.149	0	0	0	0	0	0	0	0	0	0	0	0	0	0	0	0	0	0	0	0	0	0	0	0	0	0	0	2.986
15.1028	0	0	0	0	0	0	0	0	0	0	0	0	0	0	0	0	0	0	0	0	0.919	0	0	0	0	0	0	0	0	0	0	0	0	0	0	0	0	0	0	0	0	0	0	0	0	0	0	0	3.676
15.1122	0	0	0	0	0	0	0	0	0	0	0	0	0	0	0	0	0	0	0	0	0.689	0	0	0	0	0	0	0	0	0	0	0	0	0	0	0	0	0	0	0	0	0	0	0	0	0	0	0	3.446
15.1216	0	0	0	0	0	0	0	0	0	0	0	0	0	0	0	0	0	0	0	0	0.689	0	0	0	0	0	0	0	0	0	0	0	0	0	0	0	0	0	0	0	0	0	0	0	0	0	0	0	2.068
15.131	0	0	0	0.23	0	0	0	0	0	0	0	0	0	0	0	0	0	0	0	0	0.689	0	0	0	0	0	0	0	0	0	0	0	0	0	0	0	0	0	0	0	0	0	0	0	0	0	0	0	2.527
15.1403	0	0	0	0.459	0	0	0	0	0	0	0	0	0	0	0	0	0	0	0	0	0.459	0	0	0.4595	0	0	0	0	0	0	0	0	0	0	0	0	0	0	0	0	0	0	0	0	0	0	0	0	2.986
15.1497	0	0	0	0.23	0	0	0	0	0	0	0	0	0	0	0	0	0	0	0	0	0.23	0	0	0.4595	0	0	0	0	0	0	0	0	0	0	0	0	0	0	0	0	0	0	0	0	0	0	0	0	2.986
15.1591	0	0	0	0	0	0	0	0	0	0	0	0	0	0	0	0	0	0	0	0	0.459	0	0	0.2297	0	0	0	0	0	0	0	0	0	0	0	0	0	0	0	0	0	0	0	0	0	0	0	0	2.986
15.1685	0	0	0	0	0	0	0	0	0	0	0	0	0	0	0	0	0	0	0	0	0.459	0	0	0.2297	0	0	0	0	0	0	0	0	0	0	0	0	0	0	0	0	0	0	0	0	0	0	0	0	3.676
15.1778	0	0	0	0	0	0	0	0	0	0	0	0	0	0	0	0	0	0	0	0	0.459	0	0	0	0	0	0	0	0	0	0	0	0	0	0	0	0	0	0	0	0	0	0	0	0	0	0	0	3.676
15.1872	0	0	0	0	0	0	0	0	0	0	0	0	0	0	0	0	0	0	0	0	0.689	0	0	0	0	0	0	0	0	0	0	0	0	0	0	0	0	0	0	0	0	0	0	0	0	0	0	0	4.135
15.1966	0	0	0	0	0.459	0	0	0	0	0	0	0	0	0	0	0	0	0.2297	0	0	0.689	0	0	0	0	0	0	0	0	0	0	0	0	0	0	0	0	0	0	0	0	0	0	0	0	0	0	0	4.365
15.206	0	0	0	0	0.459	0	0	0	0	0	0	0	0	0	0	0	0	0.9189	0	0	0.459	0	0	0	0	0	0	0	0	0	0	0	0	0	0	0	0	0	0	0	0	0	0	0	0	0	0	0	4.135
15.2153	0	0	0	0	0.689	0	0	0	0	0	0	0	0	0	0	0	0	1.3784	0	0	0.459	0	0	0	0	0	0	0	0	0	0	0	0	0	0	0	0	0	0	0	0	0	0	0	0	0	0	0	4.365
15.2247	0	0	0	0	1.149	0	0	0	0	0	0	0	0	0	0	0	0	1.3784	0	0	0	0	0	0	0	0	0	0	0	0	0	0	0	0	0	0	0	0	0	0	0	0	0	0	0	0	0	0	4.824
15.2341	0	0	0	0	1.149	0	0	0	0	0	0	0	0	0	0	0	0	0.4595	0	0	0	0	0	0.2297	0	0	0	0	0	0	0	0	0	0	0	0	0	0	0	0	0	0	0	0	0	0	0	0	4.595
15.2435	0	0	0	0	1.378	0	0	0	0	0	0	0	0	0	0	0	0	0.2297	0	0	0	0	0	0.2297	0	0	0	0	0	0	0	0	0	0	0	0	0	0	0	0	0	0	0	0	0	0	0	0	4.135
15.2528	0	0	0	0	0.919	0	0	0	0	0	0	0	0	0	0	0	0	0.2297	0	0	0	0	0	0.2297	0	0	0	0	0	0	0	0	0	0	0	0	0	0	0	0	0	0	0	0	0	0	0	0	3.905
15.2622	0	0	0	0	0.689	0	0	0	0	0	0	0	0	0	0	0	0	0.6892	0	0	0	0	0	1.1486	0	0	0	0	0	0	0	0	0	0	0	0	0	0	0	0	0	0	0	0	0	0	0	0	4.135
15.2716	0	0	0	0	0.23	0	0	0	0	0	0	0	0	0	0	0	0	0.4595	0	0	0	0	0	1.1486	0	0	0	0	0	0	0	0	0	0	0	0	0	0	0	0	0	0	0	0	0	0	0	0	3.216
15.281	0	0	0	0	0.23	0	0	0	0	0	0	0	0	0	0	0	0	0	0	0	0	0	0	1.3784	0	0	0	0	0	0	0	0	0	0	0	0	0	0	0	0	0	0	0	0	0	0	0	0	2.757
15.2903	0	0	0	0	0	0	0	0	0	0	0	0	0.2297	0	0	0	0	0	0	0	0.23	0	0	1.6081	0	0	0	0	0	0	0	0	0	0	0	0	0	0	0	0	0	0	0	0	0	0	0	0	2.297
15.2997	0	0	0	0	0	0	0	0	0	0	0	0	0.2297	0	0	0	0	0	0	0	0.459	0	0	0.6892	0	0	0	0	0	0	0	0	0	0	0	0	0	0	0	0	0	0	0	0	0	0	0	0	1.838
15.3091	0	0	0	0	0	0	0	0	0	0	0	0	0.4595	0	0	0	0	0	0	0	0.919	0	0	1.1486	0	0	0	0	0	0	0	0	0	0	0	0	0	0	0	0	0	0	0	0	0	0	0	0	2.527
15.3185	0	0	0	0	0	0	0	0	0	0	0	0	0.9189	0	0	0	0	0	0	0	0.689	0	0	0.6892	0	0	0	0	0	0	0	0	0	0	0	0	0	0	0	0	0	0	0	0	0	0	0	0	2.527
15.3278	0	0	0	0	0	0	0	0	0	0	0	0	0.4595	0	0	0	0	0	0	0	0.919	0	0	0.4595	0	0	0	0	0	0	0	0	0	0	0	0	0	0	0	0	0	0	0	0	0	0	0	0	1.608
15.3372	0	0	0	0	0	0	0	0	0	0	0	0	0.2297	0	0	0	0	0	0	0	0	0	0	0.2297	0	0	0	0	0	0	0	0	0	0	0	0	0	0	0	0	0	0	0	0	0	0	0	0	2.986
15.3466	0	0	0	0	0	0	0	0	0	0	0	0	0.2297	0	0	0	0	0	0	0	0	0	0	0	0	0	0	0	0	0	0	0	0	0	0	0	0	0	0	0	0	0	0	0	0	0	0	0	3.676
15.356	0	0	0	0	0	0	0	0	0	0	0	0	0	0	0	0	0	0	0	0	0	0	0	0	0	0	0	0	0	0	0	0	0	0	0	0	0	0	0	0	0	0	0	0	0	0	0	0	2.068
15.3653	0	0	0	0	0	0	0	0	0	0	0	0	0.2297	0	0	0	0	0	0	0	0	0	0	0	0	0	0	0	0	0	0	0	0	0	0	0	0	0	0	0	0	0	0	0	0	0	0	0	2.068
15.3747	0	0	0	0	0	0	0	0	0	0	0	0	0	0	0	0	0	0	0	0	0.23	0	0	0	0	0	0	0	0	0	0	0	0	0	0	0	0	0	0	0	0	0	0	0	0	0	0	0	1.608
15.3841	0	0	0	0	0	0	0	0	0	0	0	0	0	0	0	0	0	0	0	0	0.23	0	0	0	0	0	0	0	0	0	0	0	0	0	0	0	0	0	0	0	0	0	0	0	0	0	0	0	1.608
15.3934	0	0	0	0	0	0	0	0	0	0	0	0	0	0	0	0	0	0	0	0	0.459	0	0	0	0	0	0	0	0	0	0	0	0	0	0	0	0	0	0	0	0	0	0	0	0	0	0	0	1.608
15.4028	0	0	0	0	0	0	0	0	0	0	0	0	0	0	0	0	0.23	0	0	0	0.919	0	0	0	0	0	0	0	0	0	0	0	0	0	0	0	0	0	0	0	0	0	0	0	0	0	0	0	1.838
15.4122	0	0	0	0	0	0	0	0	0	0	0	0	0	0	0	0	0.919	0	0	0	0.919	0	0	0	0	0	0	0	0	0	0	0	0	0	0	0	0	0	0	0	0	0	0	0	0	0	0	0	1.149
15.4216	0	0	0	0	0	0	0	0	0	0	0	0	0	0	0	0	0.919	0	0	0	0.919	0	0	0	0	0	0	0	0	0	0	0	0	0	0	0	0	0	0	0	0	0	0	0	0	0	0	0	1.378
15.4309	0	0	0	0	0	0	0	0	0	0	0	0	0.2297	0	0	0	0.919	0	0	0	0.919	0	0	0	0	0	0	0	0	0	0	0	0	0	0	0	0	0	0	0	0	0	0	0	0	0	0	0	0.919
15.4403	0	0	0	0	0	0	0	0	0	0	0	0	0	0	0	0	0.23	0	0	0	0.919	0	0	0	0	0	0	0	0	0	0	0	0	0	0	0	0	0	0	0	0	0	0	0	0	0	0	0	0.689
15.4497	0	0	0	0	0	0	0	0	0	0	0	0	0	0	0	0	0	0	0	0	1.378	0	0	0	0	0	0	0	0	0	0	0	0	0	0	0	0	0	0	0	0	0	0	0	0	0	0	0	0.919
15.4591	0	0	0	0	0	0	0	0	0	0	0	0	0.2297	0	0	0	0	0	0	0	2.068	0	0	0	0	0	0	0	0	0	0	0	0	0	0	0	0	0	0	0	0	0	0	0	0	0	0	0	1.378
15.4684	0	0	0	0	0	0	0	0	0	0	0	0	0.2297	0	0	0	0	0	0	0	2.068	0	0	0	0	0	0	0	0	0	0	0	0	0	0	0	0	0	0	0	0	0	0	0	0	0	0	0	1.378
15.4778	0	0	0	0	0	0	0	0	0	0	0	0	0.2297	0	0	0	0	0.2297	0	0	1.149	0	0	0	0	0	0	0	0	0	0	0	0	0	0	0	0	0	0	0	0	0	0	0	0	0	0	0	0.919
15.4872	0	0	0	0	0	0	0	0	0	0	0	0	0	0.23	0	0	0	0.4595	0	0	0.689	0	0	0	0	0	0	0	0	0	0	0	0	0	0	0	0	0	0	0	0	0	0	0	0	0	0	0	0.689
15.4966	0	0	0	0	0	0	0	0	0	0	0	0	0.2297	0	0	0	0	1.3784	0	0	0.459	0	0	0	0	0	0	0	0	0	0	0	0	0	0	0	0	0	0	0	0	0	0	0	0	0	0	0	0.689
15.5059	0	0	0	0	0	0	0	0	0	0	0	0	0	0	0	0	0	1.6081	0	0	0.459	0	0	0	0	0	0	0	0	0	0	0	0	0	0	0	0	0	0	0	0	0	0	0	0	0	0	0	1.378
15.5153	0	0	0	0	0	0	0	0	0	0	0	0	0	0	0	0	0	0.9189	0	0	0.23	0	0	0	0	0	0	0	0	0	0	0	0	0	0	0	0	0	0	0	0	0	0	0	0	0	0	0	1.608
15.5247	0	0	0	0	0	0	0	0	0	0	0	0	0	0	0	0	0	0	0	0	0	0	0	0	0	0	0	0	0	0	0	0	0	0	0	0	0	0	0	0	0	0	0	0	0	0	0	0	0.919
15.5341	0	0	0	0	0	0	0	0	0	0	0	0	0	0	0	0	0	0	0	0	0	0	0	0	0	0	0	0	0	0	0	0	0	0	0	0	0	0	0	0	0	0	0	0	0	0	0	0	1.608
15.5434	0	0	0	0	0	0	0	0	0	0	0	0	0	0	0	0	0	0	0	0	0	0	0	0	0	0	0	0	0	0	0	0	0	0	0	0	0	0	0	0	0	0	0	0	0	0	0	0	1.838
15.5528	0	0	0	0	0	0	0	0	0	0	0	0	0	0	0	0	0	0	0	0	0	0	0	0	0	0	0	0	0	0	0	0	0	0	0	0	0	0	0	0	0	0	0	0	0	0	0	0	1.608
15.5622	0	0	0	0	0	0	0	0	0	0	0	0	0	0	0	0	0	0	0	0	0	0	0	0	0	0	0	0	0	0	0	0	0	0	0	0	0	0	0	0	0	0	0	0	0	0	0	0	2.297
15.5716	0	0	0	0	0	0	0	0	0	0	0	0	0	0	0	0	0	0	0	0	0	0	0	0	0	0	0	0	0	0	0	0	0	0	0	0	0	0	0	0	0	0	0	0	0	0	0	0	3.676
15.5809	0	0	0	0	0	0	0	0	0	0	0	0	0	0	0	0	0	0.2297	0	0	0	0	0	0	0	0	0	0	0	0	0	0	0	0	0	0	0	0	0	0	0	0	0	0	0	0	0	0	3.905
15.5903	0	0	0	0	0	0	0	0	0	0	0	0	0	0	0	0	0	0	0	0	0.23	0	0	0	0	0	0	0	0	0	0	0	0	0	0	0	0	0	0	0	0	0	0	0	0	0	0	0	3.446
15.5997	0	0	0	0.23	0	0	0	0	0	0	0	0	0	0	0	0	0	0	0	0	0.689	0	0	0	0	0	0	0	0	0	0	0	0	0	0	0	0	0	0	0	0	0	0	0	0	0	0	0	3.446
15.6091	0	0	0	0	0	0	0	0	0	0	0	0	0	0	0	0	0	0	0	0	0.919	0	0	0	0	0	0	0	0	0	0	0	0	0	0	0	0	0	0	0	0	0	0	0	0	0	0	0	3.446
15.6184	0	0	0	0	0	0	0	0	0	0	0	0	0	0	0	0	0	0	0	0	0.919	0	0	0	0	0	0	0	0	0	0	0	0	0	0	0	0	0	0	0	0	0	0	0	0	0	0	0	3.216
15.6278	0	0	0	0	0	0	0	0	0	0	0	0	0	0	0	0	0	0	0	0	0.689	0	0	0	0	0	0	0	0	0	0	0	0	0	0	0	0	0	0	0	0	0	0	0	0	0	0	0	2.986
15.6372	0	0	0	0	0	0	0	0	0	0	0	0	0	0	0	0	0	0	0	0	0	0	0	0	0	0	0	0	0	0	0	0	0	0	0	0	0	0	0	0	0	0	0	0	0	0	0	0	2.527
15.6466	0	0	0	0	0	0	0	0	0	0	0	0	0	0	0	0	0	0	0	0	0	0	0	0	0	0	0	0	0	0	0	0	0	0	0	0	0	0	0	0	0	0	0	0	0	0	0	0	2.757
15.6559	0	0	0	0	0	0	0	0	0	0	0	0	0	0	0	0	0	0	0	0	0	0	0	0	0	0	0	0	0	0	0	0	0	0	0	0	0	0	0	0	0	0	0	0	0	0	0	0	2.068
15.6653	0	0	0	0	0	0	0	0	0	0	0	0	0	0	0	0	0	0	0	0	0.23	0	0	0	0	0	0	0	0	0	0	0	0	0	0	0	0	0	0	0	0	0	0	0	0	0	0	0	2.527
15.6747	0	0	0	0	0	0	0	0	0	0	0	0	0.2297	0	0	0	0	0	0	0	0	0	0	0	0	0	0	0	0	0	0	0	0	0	0	0	0	0	0	0	0.23	0	0	0	0	0	0	0	1.838
15.6841	0	0	0	0	0	0	0	0	0	0	0	0	0	0	0	0	0	0	0	0	0	0	0	0	0	0	0	0	0	0	0	0	0	0	0	0	0	0	0	0	0.459	0	0	0	0	0	0	0	2.527
15.6934	0	0	0	0	0	0	0	0	0	0	0	0	0	0	0	0	0	0	0	0.2297	0	0	0	0	0	0	0	0	0	0	0	0	0	0	0	0	0	0	0	0	0.23	0	0	0	0	0	0	0	2.527
15.7028	0	0	0	0	0	0	0	0	0	0	0	0	0	0	0	0	0	0	0	0.4595	0	0	0	0	0	0	0	0	0	0	0	0	0	0	0	0	0	0	0	0	0	0	0	0	0	0	0	0	2.757
15.7122	0	0	0	0	0	0	0	0	0	0	0	0	0	0	0	0	0	0	0	0.2297	0.23	0	0	0	0	0	0	0	0	0	0	0	0	0	0	0	0	0	0	0	0	0	0	0	0	0	0	0	2.986
15.7216	0	0	0	0	0	0	0	0	0	0	0	0	0	0	0	0	0	0	0	0.2297	0.459	0	0	0	0	0	0	0	0	0	0	0	0	0	0	0	0	0	0	0	0	0	0	0	0	0	0	0	2.527
15.7309	0	0	0	0	0	0	0	0	0	0	0	0	0	0	0	0	0	0	0	0.2297	0.459	0	0	0	0	0	0	0	0	0	0	0	0	0	0	0	0	0	0	0	0	0	0	0	0	0	0	0	2.068
15.7403	0	0	0	0	0	0	0	0	0	0	0	0	0	0	0	0	0	0	0	0	0.459	0	0	0	0	0	0	0	0	0	0	0	0	0	0	0	0	0	0	0	0	0	0	0	0	0	0	0	1.608
15.7497	0	0	0	0	0	0	0	0	0	0	0	0	0	0	0	0	0	0	0	0	0.459	0	0	0	0	0	0	0	0	0	0	0	0	0	0	0	0	0	0	0	0	0	0	0.23	0.23	0	0	0	1.608
15.7591	0	0	0	0	0	0	0	0	0	0	0	0	0	0	0	0	0	0	0	0	0	0	0	0	0	0	0	0	0	0	0	0	0	0	0	0	0	0	0	0	0	0	0	0	0	0	0	0	1.608
15.7684	0	0	0	0	0	0	0	0	0	0	0	0	0	0	0	0	0	0	0	0	0.459	0	0	0	0	0	0	0	0	0	0	0	0	0	0	0	0	0	0	0	0	0	0	0	0	0	0	0	1.378
15.7778	0	0	0	0	0	0	0	0	0	0	0	0	0	0	0	0	0	0	0	0	0	0	0	0	0	0	0	0	0	0	0	0	0	0	0	0	0	0	0	0	0	0	0	0	0	0	0	0	1.149
15.7872	0	0	0	0	0	0	0	0	0	0	0	0	0	0	0	0	0	0	0	0	0	0	0	0	0	0	0	0	0	0	0	0	0	0	0	0	0	0	0	0	0	0	0	0	0	0	0	0	0.689
15.7966	0	0	0	0	0	0	0	0	0	0	0	0	0	0	0	0	0	0	0	0	0	0	0	0	0	0	0	0	0	0	0	0.23	0	0	0	0	0	0	0	0	0	0	0	0	0	0	0	0	0.919
15.8059	0.2297	0	0	0	0	0	0	0	0	0	0	0	0	0	0	0	0	0	0	0	0.23	0	0	0	0	0	0	0	0	0	0	0.459	0	0	0	0	0	0	0	0	0	0	0	0	0	0	0	0	1.149
15.8153	0.4595	0	0	0	0	0	0	0	0	0	0	0	0	0	0	0	0	0	0	0	0.689	0	0	0	0	0	0	0	0	0	0	0.459	0	0	0	0	0	0	0	0	0	0	0	0	0	0	0	0	0.919
15.8247	0	0	0	0	0	0	0	0	0	0	0	0	0	0	0	0	0	0	0	0	0.919	0	0	0	0	0	0	0	0	0	0	0.459	0	0	0	0	0	0	0	0	0	0	0	0	0	0	0	0	1.149
15.8341	0	0	0	0	0	0	0	0	0	0	0	0	0	0	0	0	0	0	0	0	0.459	0	0	0	0	0	0	0	0	0	0	0.23	0	0	0	0	0	0	0	0	0	0	0	0	0	0	0	0	1.608
15.8434	0	0	0	0	0	0	0	0	0	0	0	0	0	0	0	0	0	0	0	0	0	0	0	0	0	0	0	0	0	0	0	0.23	0	0	0	0	0	0	0	0	0	0	0	0	0	0	0	0	1.149
15.8528	0	0	0	0	0	0	0	0	0	0	0	0	0	0	0	0	0	0	0	0	0.23	0	0	0	0	0	0	0	0	0	0	0	0	0	0	0	0	0	0	0	0	0	0	0	0	0	0	0	0.919
15.8622	0	0	0	0	0	0	0	0	0	0	0	0	0	0	0	0	0	0	0	0	0.23	0	0	0	0	0	0	0	0	0	0	0	0	0	0	0	0	0	0	0	0	0	0	0	0	0	0	0	0.459
15.8716	0	0	0	0	0	0	0	0	0	0	0	0	0	0	0	0	0	0	0	0	0.459	0	0	0	0	0	0	0	0	0	0	0	0	0	0	0	0	0	0	0	0	0	0	0	0	0	0	0	0.689
15.8809	0	0	0	0	0	0	0	0	0	0	0	0	0	0	0	0	0	0	0	0	0.459	0	0	0	0	0	0	0	0	0	0	0	0	0	0	0	0	0	0	0	0	0	0	0	0	0	0	0	0.459
15.8903	0	0	0	0	0	0	0	0	0	0	0	0	0	0	0	0	0	0	0	0	1.149	0	0	0	0	0	0	0	0	0	0	0	0	0	0	0	0	0	0	0	0	0	0	0	0	0	0	0	0.459
15.8997	0	0	0	0	0	0	0	0	0	0	0	0	0	0	0	0	0	0	0	0	1.608	0	0	0	0	0	0	0	0	0	0	0	0	0	0	0	0	0	0	0	0	0	0	0	0	0	0	0	1.378
15.9091	0	0	0	0	0	0	0	0	0	0	0	0	0	0	0	0	0	0	0	0	2.527	0	0	0	0	0	0	0	0	0	0	0	0	0	0	0	0	0	0	0	0	0	0	0	0	0	0	0	1.608
15.9184	0	0	0	0	0	0	0	0	0	0	0	0	0	0	0	0	0	0	0	0	2.757	0	0	0	0	0	0	0	0	0	0	0	0	0	0	0	0	0	0	0	0	0	0	0	0	0	0	0	0.919
15.9278	0	0	0	0	0	0	0	0	0	0	0	0	0	0	0	0	0	0	0	0	2.297	0	0	0	0	0	0	0	0	0	0	0	0	0	0	0	0	0	0	0	0	0	0	0	0	0	0	0	0.919
15.9372	0	0	0	0	0	0	0	0	0	0	0	0	0	0	0	0	0	0	0	0	1.378	0	0	0	0	0	0	0	0	0	0	0	0	0	0	0	0	0	0	0	0	0	0	0	0	0	0	0	1.149
15.9466	0	0	0	0	0	0	0	0	0	0	0	0	0	0	0	0	0	0	0	0	0.919	0	0	0	0	0	0	0	0	0	0	0	0	0	0	0	0	0	0	0	0	0	0	0	0	0	0	0	1.608
15.9559	0	0	0	0	0	0	0	0	0	0	0	0	0	0	0	0	0	0	0	0	0.919	0	0	0	0	0	0	0	0	0	0	0	0	0	0	0	0	0	0	0	0	0	0	0	0	0	0	0	1.838
15.9653	0	0	0	0	0	0	0	0	0	0	0	0	0	0	0	0	0	0	0	0	0.459	0	0	0	0	0	0	0	0	0	0	0	0	0	0	0	0	0	0	0	0	0	0	0	0	0	0	0	1.378
15.9747	0	0	0	0	0	0	0	0	0	0	0	0	0	0	0	0	0	0	0	0	0	0	0	0	0	0	0	0	0	0	0	0	0	0	0	0	0	0	0	0	0	0	0	0	0	0	0	0	2.068
15.9841	0	0	0	0	0	0	0	0	0	0	0	0	0	0	0	0	0	0	0	0	0	0	0	0	0	0	0	0	0	0	0	0	0	0	0	0	0	0	0	0	0	0	0	0	0	0	0	0	2.068
15.9934	0	0	0	0	0	0	0	0	0	0	0	0	0	0	0	0	0	0	0	0	0.459	0	0	0	0	0	0	0	0	0	0	0	0	0	0	0	0	0	0	0	0	0	0	0	0	0	0	0	1.838
16.0028	0	0	0	0	0	0	0	0	0	0	0	0	0	0	0	0	0	0	0	0	1.378	0	0	0	0	0	0	0	0	0	0	0	0	0	0	0	0	0	0	0	0	0.459	0	0	0	0	0	0	2.527
16.0122	0	0	0	0	0	0	0	0	0	0	0	0	0	0	0	0	0	0	0	0	2.527	0	0	0	0	0	0	0	0	0	0	0	0	0	0	0	0	0	0	0	0	0	0	0	0	0	0	0	2.297
16.0216	0	0	0	0	0	0	0	0	0	0	0	0	0	0	0	0	0	0	0	0	2.297	0	0	0	0	0	0	0	0	0	0	0	0	0	0	0	0	0	0	0	0	0	0	0	0	0	0	0	2.527
16.0309	0	0	0	0	0	0	0	0	0	0	0	0	0	0	0	0	0	0	0	0	2.527	0	0	0	0	0	0	0	0	0	0	0	0	0	0	0	0	0	0	0	0	0	0	0	0	0	0	0	2.527
16.0403	0	0	0	0	0	0	0	0	0	0	0	0	0	0	0	0	0.23	0	0	0	1.149	0	0	0.2297	0	0	0	0	0	0	0	0	0	0	0	0	0	0	0	0	0	0	0	0	0	0	0	0	2.297
16.0497	0	0	0	0	0	0	0	0	0	0	0	0	0	0	0	0	0.689	0	0	0	0.459	0	0	0.2297	0	0	0	0	0	0	0	0	0	0	0	0	0	0	0	0	0	0	0	0	0	0	0	0	2.297
16.0591	0	0	0	0	0	0	0	0	0	0	0	0	0	0	0	0	0.689	0	0	0	0.459	0	0	0	0	0	0	0	0	0	0	0	0	0	0	0	0	0	0	0	0	0	0	0	0	0	0	0	1.838
16.0684	0	0	0	0	0	0	0	0	0	0	0	0	0	0	0	0	0	0	0	0	0.689	0	0	0.4595	0	0	0	0	0	0	0	0	0	0	0	0	0	0	0	0	0	0	0	0	0	0	0	0	2.297
16.0778	0	0	0	0	0	0	0	0	0	0	0	0	0	0	0	0	0	0	0	0	1.378	0	0	0.4595	0	0	0	0	0	0	0	0	0	0	0	0	0	0	0	0	0	0	0	0	0	0	0	0	2.068
16.0872	0	0	0	0	0	0	0	0	0	0	0	0	0	0	0	0	0	0	0	0	1.378	0	0	0.4595	0	0	0	0	0	0	0	0	0	0	0	0	0	0	0	0	0	0	0	0	0	0	0	0	1.608
16.0966	0	0	0	0	0	0	0	0	0	0	0	0	0	0	0	0	0	0	0	0	1.838	0	0	0.4595	0	0	0	0	0	0	0	0	0	0	0	0	0	0	0	0	0	0	0	0	0	0	0	0	1.378
16.1059	0	0	0	0	0	0	0	0	0	0	0	0	0	0	0	0	0	0.2297	0	0	1.378	0	0	0	0	0	0	0	0	0	0	0	0	0	0	0	0	0	0	0	0	0	0	0	0	0	0	0	1.838
16.1153	0	0	0	0	0	0	0	0	0	0	0	0	0	0	0	0	0	0.2297	0	0	0.23	0	0	0	0	0	0	0	0	0	0	0	0	0	0	0	0	0	0	0	0	0	0	0	0	0	0	0	1.608
16.1247	0	0	0	0	0	0	0	0	0	0	0	0	0	0	0	0	0	0	0	0	0	0	0	0	0	0	0	0	0	0	0	0	0	0	0	0	0	0	0	0	0	0	0	0	0	0	0	0	1.378
16.1341	0	0	0	0	0	0	0	0	0	0	0	0	0	0	0	0	0	0	0	0	0.23	0	0	0	0	0	0	0	0	0	0	0	0	0	0	0	0	0	0	0	0	0	0	0	0	0	0	0	1.838
16.1434	0	0	0	0	0	0	0	0	0	0	0	0	0	0	0	0	0	0	0	0	0.459	0	0	0	0	0	0	0	0	0	0	0	0	0	0	0	0	0	0	0	0	0	0	0	0	0	0	0	2.527
16.1528	0	0	0	0	0	0	0	0	0	0	0	0	0	0	0	0	0	0.4595	0	0	0.689	0	0	0.4595	0	0	0	0	0	0	0	0	0	0	0	0	0	0	0	0	0	0	0	0	0	0	0	0	2.527
16.1622	0	0	0	0	0	0	0	0	0	0	0	0	0	0	0	0	0	0.9189	0	0	1.838	0	0	0.9189	0	0	0	0	0	0	0	0	0	0	0	0	0	0	0	0	0	0	0	0	0	0	0	0	2.297
16.1716	0	0	0	0	0	0	0	0	0	0	0	0	0	0	0	0	0	0.4595	0	0	1.838	0	0	0.9189	0	0	0	0	0	0	0	0	0	0	0	0	0	0	0	0	0	0	0	0	0	0	0	0	2.297
16.1809	0	0	0	0	0	0	0	0	0	0	0	0	0	0	0	0	0	0.4595	0	0	2.527	0	0	0.9189	0	0	0	0	0	0	0	0	0	0	0	0	0	0	0	0	0	0	0	0	0	0	0	0	2.068
16.1903	0	0	0	0	0	0	0	0	0	0	0	0	0	0	0	0	0	0.6892	0	0	1.378	0	0	0.9189	0	0	0	0	0	0	0	0	0	0	0	0	0	0	0	0	0	0	0	0	0	0	0	0	2.068
16.1997	0	0	0	0	0	0	0	0	0	0	0	0	0	0	0	0	0	1.3784	0.23	0	1.608	0	0	1.6081	0	0	0	0	0	0	0	0	0	0	0	0	0	0	0	0	0	0	0	0	0	0	0	0	3.446
16.2091	0	0	0	0	0	0	0	0	0	0	0	0	0	0	0	0	0	1.3784	0	0	1.608	0	0	1.8378	0	0	0	0	0	0	0	0	0	0	0	0	0	0	0	0	0	0	0	0	0	0	0	0	2.068
16.2184	0	0	0	0	0	0	0	0	0	0	0	0	0	0	0	0	0	0.9189	0	0	1.378	0	0	1.6081	0	0	0	0	0	0	0	0	0	0	0	0	0	0	0	0	0	0	0	0	0	0	0	0	1.608
16.2278	0	0	0	0	0	0	0	0	0	0	0	0	0	0	0	0	0	0.6892	0	0	1.608	0	0	1.1486	0	0	0	0	0	0	0	0	0	0	0	0	0	0	0	0	0	0	0	0	0	0	0	0	1.838
16.2372	0	0	0	0	0	0	0	0	0	0	0	0	0	0	0	0	0	0.2297	0	0	1.378	0	0	0.9189	0	0	0	0	0	0	0	0	0	0	0	0	0	0	0	0	0	0	0	0	0	0	0	0	2.757
16.2466	0	0	0	0	0	0	0	0	0	0	0	0	0	0	0	0	0	0	0	0	1.149	0	0	1.3784	0	0	0	0	0	0	0	0	0	0	0	0	0	0	0	0	0	0	0	0	0	0	0	0	2.757
16.2559	0	0	0	0	0	0	0	0	0	0	0	0	0	0	0	0	0	0	0	0	0.689	0	0	1.3784	0	0	0	0	0	0	0	0	0	0	0	0	0	0	0	0	0	0	0	0	0	0	0	0	3.446
16.2653	0	0	0	0	0	0	0	0	0	0	0	0	0	0	0	0	0	0	0	0	0.689	0	0	1.1486	0	0	0	0	0	0	0	0	0	0	0	0	0	0	0	0	0	0	0	0	0	0	0	0	3.676
16.2747	0	0	0	0	0	0	0	0	0	0	0	0	0	0	0	0	0	0	0	0	1.378	0	0	0.6892	0	0	0	0	0	0	0	0	0	0	0	0	0	0	0	0	0	0	0	0	0	0	0	0	3.676
16.2841	0	0	0	0	0	0	0	0	0	0	0	0	0	0	0	0	0	0	0	0	2.757	0	0	0.2297	0	0	0	0	0	0	0	0	0	0	0	0	0	0	0	0	0	0	0	0	0	0	0	0	3.216
16.2934	0	0	0	0	0	0	0	0	0	0	0	0	0	0	0	0	0	0	0	0	1.608	0	0	0.2297	0	0	0	0	0	0	0	0	0	0	0	0	0	0	0	0	0	0	0	0	0	0	0	0	2.986
16.3028	0	0	0	0	0	0	0	0	0	0	0	0	0	0	0	0	0	0	0	0	1.149	0	0	0.2297	0	0	0	0	0	0	0	0	0	0	0	0	0	0	0	0	0	0	0	0	0	0	0	0	2.527
16.3122	0	0	0	0	0	0	0	0	0	0	0	0	0	0	0	0	0	0	0	0	0.689	0	0	1.1486	0	0	0	0	0	0	0	0	0	0	0	0	0	0	0	0	0	0	0	0	0	0	0	0	1.608
16.3216	0	0	0	0	0	0	0	0	0	0	0	0	0	0	0	0	0	0	0	0	0.459	0	0	1.6081	0	0	0	0	0	0	0	0	0	0	0	0	0	0	0	0	0	0	0	0	0	0	0	0	1.838
16.3309	0	0	0	0	0	0	0	0	0	0	0	0	0	0	0	0	0	0	0	0	0.459	0	0	1.6081	0	0	0.23	0	0	0	0	0	0	0	0	0	0	0	0	0	0	0	0	0	0	0	0	0	1.149
16.3403	0	0	0	0	0	0	0	0	0	0	0	0	0	0	0	0	0	0	0	0	0.459	0	0	1.8378	0	0	0	0	0	0	0	0	0	0	0	0	0	0	0	0	0	0	0	0	0	0	0	0	1.608
16.3497	0	0	0	0	0	0	0	0	0	0	0	0	0	0	0	0	0	0	0	0	0.459	0	0	0.9189	0	0	0	0	0	0	0	0	0	0	0	0	0	0	0	0	0	0	0	0	0	0	0	0	1.378
16.3591	0	0	0	0	0	0	0	0	0	0	0	0	0	0	0	0	0	0	0	0	0.689	0	0	0.6892	0	0	0	0	0	0	0	0	0	0	0	0	0	0	0	0	0	0	0	0	0	0	0	0	1.838
16.3684	0	0	0	0	0	0	0	0	0	0	0	0	0	0	0	0	0	0	0	0	0.689	0	0	0.6892	0	0	0	0	0	0	0	0	0	0	0	0	0	0	0	0	0	0	0	0	0	0	0	0	2.297
16.3778	0	0	0	0.23	0	0	0	0	0	0	0	0	0	0	0	0	0	0	0	0	0	0	0.2297	0.9189	0	0	0	0	0	0	0	0	0	0	0	0	0	0	0	0	0	0	0	0	0	0	0	0	2.297
16.3872	0	0	0	0.459	0	0	0	0	0	0	0	0	0	0	0	0	0	0	0	0	0.23	0	0.2297	0.4595	0	0	0	0	0	0	0	0	0	0	0	0	0	0	0	0	0	0	0	0	0	0	0	0	2.297
16.3966	0	0	0	0.23	0	0	0	0	0	0	0	0	0	0	0	0	0	0	0	0	0.459	0	0.4595	0.4595	0	0	0	0	0	0	0	0	0	0	0	0	0	0	0	0	0	0	0	0	0	0	0	0	2.068
16.4059	0	0	0	0.23	0	0	0	0	0	0	0	0	0	0	0	0	0	0	0	0	0.689	0	0.4595	1.1486	0	0	0	0	0	0	0	0	0	0	0	0	0	0	0	0	0	0	0	0	0	0	0	0	2.068
16.4153	0	0	0	0	0	0	0	0	0	0	0	0	0	0	0	0	0	0	0	0	0.459	0	0.6892	1.6081	0	0	0	0	0	0	0	0	0	0	0	0	0	0	0	0	0	0	0	0	0	0	0	0	2.068
16.4247	0	0	0	0	0	0	0	0	0	0	0	0	0	0	0	0	0	0	0	0	0.919	0	0.6892	2.0676	0	0	0	0	0	0	0	0	0	0	0	0	0	0	0	0	0	0	0	0	0	0	0	0	2.297
16.4341	0	0	0	0	0	0	0	0	0	0	0	0	0	0	0	0	0	0	0	0	0.689	0	0.6892	0.9189	0	0	0	0	0	0	0	0	0	0	0	0	0	0	0	0	0	0	0	0	0	0	0	0	1.838
16.4434	0	0	0	0	0	0	0	0	0	0	0	0.23	0	0	0	0	0	0	0	0	0.919	0	0.2297	1.3784	0	0	0	0	0	0	0	0	0	0	0	0	0	0	0	0	0	0	0	0	0	0	0	0	1.378
16.4528	0	0	0	0	0	0	0	0	0	0	0	0.23	0	0	0.23	0	0	0	0	0	0.919	0	0	0.4595	0	0	0	0	0	0	0	0	0	0	0	0	0	0	0	0	0	0	0	0	0	0	0	0	1.608
16.4622	0	0	0	0	0	0	0	0	0	0	0	0.459	0	0	0.23	0	0	0	0	0	0.919	0	0	0	0	0	0	0	0	0	0	0	0	0	0	0	0	0	0	0	0	0	0	0	0	0	0	0	1.608
16.4716	0	0	0	0	0	0	0	0	0	0	0	0.23	0	0	0.23	0	0	0	0	0	1.378	0	0	0	0	0	0	0	0	0	0	0	0	0	0	0	0	0	0	0	0	0	0	0	0	0	0	0	1.608
16.4809	0	0	0	0	0	0	0	0	0	0	0	0	0	0	0.23	0	0	0	0	0	0.689	0	0	0	0	0	0	0	0	0	0	0	0	0	0	0	0	0	0	0	0	0	0	0	0	0	0	0	1.378
16.4903	0	0	0	0	0	0	0	0	0	0	0	0	0	0	0.23	0	0	0	0	0	0	0	0	0	0	0	0	0	0	0	0	0	0	0	0	0	0	0	0	0	0	0	0	0	0	0	0	0	1.608
16.4997	0	0	0	0	0	0	0	0	0	0	0	0	0	0	0	0	0	0	0	0	0	0	0	0.2297	0	0	0	0	0	0	0	0	0	0	0	0	0	0	0	0	0	0	0	0	0	0	0	0	2.297
16.5091	0	0	0	0	0	0	0	0	0	0	0	0	0	0	0	0	0	0.4595	0	0	0	0	0	0.4595	0	0	0	0	0	0	0	0	0	0	0	0	0	0	0	0	0	0	0	0	0	0	0	0	2.297
16.5184	0	0	0	0	0	0	0	0	0	0	0	0	0	0	0	0	0	0.4595	0	0	0	0	0	0.2297	0	0	0	0	0	0	0	0	0	0	0	0	0	0	0	0	0	0	0	0	0	0	0	0	2.757
16.5278	0	0	0	0	0	0	0	0	0	0	0	0	0	0	0	0	0	0	0	0	0	0	0	0.4595	0	0	0	0	0	0	0	0	0	0	0	0	0	0	0	0	0	0	0	0	0	0	0	0	2.757
16.5372	0	0	0	0	0	0	0	0	0	0	0	0	0	0	0	0	0	0	0	0	0.23	0	0	0.4595	0	0	0	0	0	0	0	0	0	0	0	0	0	0	0	0	0	0	0	0	0	0	0	0	2.986
16.5466	0	0	0	0	0	0	0	0	0	0	0	0	0	0	0	0	0	0	0	0	0.459	0	0	0.4595	0	0	0	0	0	0	0	0	0	0	0	0	0	0	0	0	0	0	0	0	0	0	0	0	2.986
16.5559	0	0	0	0	0	0	0	0	0	0	0	0	0	0	0	0	0	0	0	0	0.23	0	0	0.2297	0	0	0	0	0	0	0	0	0	0	0	0	0	0	0	0	0	0	0	0	0	0	0	0	2.986
16.5653	0	0	0	0	0	0	0	0	0	0	0	0	0	0	0	0	0	0	0	0	0	0	0	0.2297	0	0	0	0	0	0	0	0	0	0	0	0	0	0	0	0	0	0	0	0	0	0	0	0	2.986
16.5747	0	0	0	0	0	0	0	0	0	0	0	0	0	0	0	0	0	0	0	0	0.23	0	0	0	0	0	0	0	0	0	0	0	0	0	0	0	0	0	0	0	0	0	0	0	0	0	0	0	2.757
16.5841	0	0	0	0	0	0	0	0	0	0	0	0	0	0	0	0	0	0	0	0	0.689	0	0	0	0	0	0	0	0	0	0	0	0	0	0	0	0	0	0	0	0	0	0	0	0	0	0	0	2.757
16.5934	0	0	0	0	0	0	0	0	0	0	0	0	0	0	0	0	0	0	0	0	0.23	0	0	0	0	0	0	0	0	0	0	0.23	0	0	0	0	0	0	0	0	0	0	0	0	0	0	0	0	2.297
16.6028	0	0	0	0	0	0	0	0	0	0	0	0	0	0	0	0	0	0	0	0	0.459	0	0	0	0	0	0	0	0	0	0	0.23	0	0	0	0	0	0	0	0	0	0	0	0	0	0	0	0	2.297
16.6122	0	0	0	0	0	0	0	0	0	0	0	0	0	0	0	0	0	0	0	0	0.23	0	0	0	0	0	0	0	0	0	0	0.459	0	0	0	0	0	0	0	0	0	0	0	0	0	0	0	0	2.297
16.6215	0	0	0	0	0	0	0	0	0	0	0	0	0	0	0	0	0	0	0	0	0.23	0	0	0	0	0	0	0	0	0	0	0.23	0	0	0	0	0	0	0	0	0	0	0	0	0	0	0	0	2.068
16.6309	0	0	0	0	0	0	0	0	0	0	0	0	0	0	0	0	0	0	0	0	0	0	0	0	0	0	0	0	0	0	0	0.459	0	0	0	0	0	0	0	0	0	0	0	0	0	0	0	0	2.527
16.6403	0	0	0	0	0	0	0	0	0	0	0	0	0	0	0	0	0	0	0	0	0	0	0	0	0	0	0	0	0	0	0	0	0	0	0	0	0	0	0	0	0	0	0	0	0	0	0	0	2.757
16.6497	0	0	0	0	0	0	0	0	0	0	0	0	0	0	0	0	0	0	0	0	0	0	0	0	0	0	0	0	0	0	0	0	0	0	0	0	0	0	0	0	0	0	0	0	0	0	0	0	2.527
16.659	0	0	0	0	0	0	0	0	0	0	0	0	0	0	0	0	0	0	0	0	0.459	0	0	0	0	0	0	0	0	0	0	0	0	0	0	0	0	0	0	0	0	0	0	0	0	0	0	0	2.527
16.6684	0	0	0	0	0	0	0	0	0	0	0	0	0	0	0	0	0	0	0	0	0.689	0	0	0	0	0	0	0	0	0	0	0	0	0	0	0	0	0	0	0	0	0	0	0	0	0	0	0	1.838
16.6778	0	0	0	0	0	0	0	0	0	0	0	0	0	0	0	0	0	0	0	0	0.689	0	0	0	0	0	0	0.23	0	0	0.23	0	0	0	0	0	0	0	0	0	0	0	0	0	0	0	0	0	1.149
16.6872	0	0	0	0	0	0	0	0	0	0	0	0	0	0	0	0	0	0	0	0	0.23	0	0	0.2297	0	0	0	0.23	0	0	0.459	0	0	0	0	0	0	0	0	0	0	0	0	0	0	0	0	0	0.23
16.6965	0	0	0	0	0	0	0	0	0	0	0	0	0	0	0	0	0	0	0	0	0	0	0	0	0	0	0	0.23	0	0	0.459	0	0	0	0	0	0	0	0	0	0	0	0	0	0	0	0	0	0.459
16.7059	0	0	0	0	0	0	0	0	0	0	0	0	0	0	0.23	0	0	0	0	0	0	0	0	0	0	0	0	0	0	0	0.23	0	0	0	0	0	0	0	0	0	0	0	0	0	0	0	0	0	0.23
16.7153	0	0	0	0	0	0	0	0	0	0	0	0	0	0	0.23	0	0	0	0	0	0	0	0	0	0	0	0	0	0	0	0.23	0	0	0	0	0	0	0	0	0	0	0	0	0	0	0	0	0	0
16.7247	0	0	0	0	0	0	0	0	0	0	0	0	0	0.23	0.23	0	0	0	0	0	0	0	0	0.2297	0	0	0	0	0	0	0.23	0	0	0	0	0	0	0	0	0	0	0	0	0	0	0	0	0	0
16.734	0	0	0	0	0	0	0	0	0	0	0	0	0	0	0.23	0	0	0	0	0	0	0	0	0.2297	0	0	0	0	0	0	0	0	0	0	0	0	0	0	0	0	0	0	0	0	0	0	0	0	0
16.7434	0	0	0	0	0	0	0	0	0	0	0.23	0	0	0	0	0	0	0	0	0	0	0	0	0.9189	0	0	0	0	0	0	0.459	0	0	0	0	0	0	0	0	0	0	0	0	0	0	0	0	0	0
16.7528	0	0	0	0	0	0	0	0	0	0	0	0	0	0	0	0	0	0	0	0	0	0	0	0.4595	0	0	0	0	0	0	0.23	0	0	0	0	0	0	0	0	0	0	0	0	0	0	0	0	0	0
16.7622	0	0	0	0	0	0	0	0	0	0	0	0	0	0	0	0	0	0	0	0	0.23	0	0	0.9189	0	0	0	0	0	0	0	0	0	0	0	0	0	0	0	0	0	0	0	0	0	0	0	0	0
16.7715	0	0	0	0.23	0	0	0	0	0	0	0	0	0	0	0	0	0	0	0	0	0.23	0	0	1.3784	0	0	0	0	0	0	0	0	0	0	0	0	0	0	0	0	0	0	0	0	0	0	0	0	0
16.7809	0	0	0	0.459	0	0	0	0	0	0	0	0	0	0	0	0	0	0	0	0	0.459	0	0	1.6081	0	0	0	0	0	0	0.919	0	0	0	0	0	0	0	0	0	0	0	0	0	0	0	0	0	0
16.7903	0	0	0	0	0	0	0	0	0	0	0	0	0	0	0	0	0	0	0	0	0.459	0	0	2.0676	0	0	0	0	0	0	0.23	0	0	0	0	0	0	0	0	0	0	0	0	0	0	0	0	0	0
16.7997	0	0	0	0	0	0	0	0	0	0	0	0	0	0	0	0	0	0	0	0	0	0	0	1.8378	0	0	0	0	0	0	0	0	0	0	0	0	0	0	0	0	0	0	0	0	0	0	0	0	0
16.809	0	0	0	0	0	0	0	0	0	0	0	0	0	0	0	0	0	0	0	0	0	0	0	1.8378	0	0	0	0	0	0	0	0	0	0	0	0	0	0	0	0	0	0	0	0	0	0	0	0	0.23
16.8184	0	0	0	0	0	0	0	0	0	0	0	0	0	0	0	0	0	0	0	0	0	0	0	1.3784	0	0	0	0	0	0	0	0	0	0	0	0	0	0	0	0	0	0	0	0	0	0	0	0	0.459
16.8278	0	0	0	0	0	0	0	0	0	0	0	0	0	0	0	0	0	0	0	0	0	0	0	1.1486	0	0	0	0	0	0	0	0	0	0	0	0	0	0	0	0	0	0	0	0	0	0	0	0	0
16.8372	0	0	0	0	0	0	0	0	0	0	0	0	0	0	0	0	0	0.2297	0	0	0	0	0	1.6081	0	0	0	0	0	0	0	0.23	0	0	0	0	0	0	0	0	0	0	0	0	0	0	0	0	0.459
16.8465	0	0	0	0	0	0	0	0	0	0	0	0	0	0	0	0	0	0.9189	0	0	0	0	0	1.1486	0	0	0	0	0	0	0	0.23	0	0	0	0	0	0	0	0	0	0	0	0	0	0	0	0	0.919
16.8559	0	0	0	0	0	0	0	0	0	0	0	0	0	0	0	0	0	0.6892	0	0	0	0	0	1.6081	0	0	0	0	0	0	0	0	0	0	0	0	0	0	0	0	0	0	0	0	0	0	0	0	0.919
16.8653	0	0	0	0	0	0	0	0	0	0	0	0	0	0	0	0	0	0.4595	0	0	0.23	0	0	1.6081	0	0	0	0	0	0	0	0	0	0	0	0	0	0	0	0	0	0	0	0	0	0	0	0	0
16.8747	0	0	0	0	0	0	0	0	0	0	0	0	0	0	0	0	0	0	0	0	0.23	0	0	1.3784	0	0	0	0	0	0	0	0	0	0	0	0	0	0	0	0	0	0	0	0	0	0	0	0	0.689
16.884	0	0	0	0	0	0	0	0	0	0	0	0	0	0	0	0	0	0	0	0	0.459	0	0	1.1486	0	0	0	0	0	0	0	0	0	0	0	0	0	0	0	0	0	0	0	0	0	0	0	0	1.149
16.8934	0	0	0	0	0	0	0	0	0	0	0	0	0	0	0	0	0	0.4595	0	0	0.23	0	0	0.6892	0	0	0	0	0	0	0	0	0	0	0	0	0	0	0	0	0	0	0	0	0	0	0	0	1.149
16.9028	0	0	0	0	0	0	0	0	0	0	0	0	0	0	0	0	0	0.2297	0	0	0.23	0	0	0.6892	0	0	0	0	0	0	0	0	0	0	0	0	0	0	0	0	0	0	0	0	0	0	0	0	1.378
16.9122	0	0	0	0	0	0	0	0	0	0	0	0	0	0	0	0	0	0	0	0	0	0	0	1.1486	0	0	0	0	0	0	0	0	0	0	0	0	0	0	0	0	0	0	0	0	0	0	0	0	1.838
16.9215	0	0	0	0	0	0	0	0	0	0	0	0	0	0	0	0	0	0	0	0	0.689	0	0	0.9189	0	0	0	0	0	0	0	0	0	0	0	0	0	0	0	0	0	0	0	0	0	0	0	0	1.378
16.9309	0	0	0	0	0	0	0	0	0	0	0	0	0	0	0	0	0	0	0	0	0.689	0	0	0.6892	0	0	0	0	0	0	0	0	0	0	0	0	0	0	0	0	0	0	0	0	0	0	0	0	0.919
16.9403	0	0	0	0	0	0	0	0	0	0	0	0	0	0	0	0	0	0	0	0	0.919	0	0	0	0	0	0	0	0	0	0	0	0	0	0	0	0	0	0	0	0	0	0	0	0	0	0	0	0.689
16.9497	0	0	0	0	0	0	0	0	0	0	0	0	0	0	0	0	0	0.2297	0	0	0.919	0	0	0.2297	0	0	0	0	0	0	0	0	0	0	0	0	0	0	0	0	0	0	0	0	0	0	0	0	0
16.959	0	0	0	0	0	0	0	0	0	0	0	0	0	0	0	0	0	0	0	0	1.149	0	0	0.2297	0	0	0	0	0	0	0	0	0	0	0	0	0	0	0	0	0	0	0	0	0	0	0	0	0
16.9684	0	0	0	0	0	0	0	0	0	0	0	0	0	0	0	0	0.23	0.2297	0	0	0.919	0	0	0.2297	0	0	0	0	0	0	0	0	0	0	0	0	0	0	0	0	0	0	0	0	0	0	0	0	0
16.9778	0	0	0	0	0	0	0	0	0	0	0	0	0	0	0	0	0	0	0	0	0.23	0	0	0	0	0	0	0	0	0	0	0	0	0	0	0	0	0	0	0	0	0	0	0	0	0	0	0	0
16.9872	0	0	0	0	0	0	0	0	0	0	0	0	0	0	0	0	0	0	0	0	0.689	0	0	0	0	0	0	0	0	0	0	0	0	0	0	0	0	0	0	0	0	0	0	0	0	0	0	0	0
16.9965	0	0	0	0	0	0	0	0	0	0	0	0	0	0	0	0	0	0	0	0	0.689	0	0	0	0	0	0	0	0	0	0	0	0	0	0	0	0	0	0	0	0	0	0	0	0	0	0	0	0
17.0059	0	0	0	0	0	0	0	0	0	0	0	0	0	0	0	0	0	0	0	0	0.689	0	0	0	0	0	0	0	0	0	0	0	0	0	0	0	0	0	0	0	0	0	0	0	0	0	0	0	0
17.0153	0	0	0	0	0	0	0	0	0	0	0	0	0	0	0	0	0	0	0	0	0	0	0	0	0	0	0.459	0	0	0	0	0	0	0	0	0	0	0	0	0	0	0	0	0	0	0	0	0	0
17.0247	0	0	0	0	0	0	0	0	0	0	0	0	0	0	0	0	0	0	0	0	0	0	0	0	0	0	0.23	0	0	0	0	0	0	0	0	0	0	0	0	0	0	0	0	0	0	0	0	0	0.23
17.034	0	0	0	0	0	0	0	0	0	0	0	0	0	0	0	0	0	0	0	0	0	0	0	0	0	0	0	0	0	0	0	0	0	0	0	0	0	0	0	0	0	0	0	0	0	0	0	0	0.689
17.0434	0	0	0	0	0	0	0	0	0	0	0	0	0	0	0	0	0	0	0	0	0	0	0	0	0	0	0	0	0	0	0	0	0	0	0	0	0	0	0	0	0	0	0	0	0	0	0	0	0.689
17.0528	0	0	0	0	0	0	0	0	0	0	0	0	0	0	0	0	0	0	0	0	0.23	0	0	0	0	0	0	0	0	0	0	0	0	0	0	0	0	0	0	0	0	0	0	0	0	0	0	0	0.919
17.0622	0	0	0	0	0	0	0	0	0	0	0	0	0	0	0	0	0	0	0	0	0.23	0	0	0	0	0	0	0	0	0	0	0	0	0	0	0	0	0	0	0	0	0	0	0	0	0	0	0	0.23
17.0715	0	0	0	0	0	0	0	0	0	0	0	0	0	0	0	0	0	0.2297	0	0	0	0	0	0	0	0	0	0	0	0	0	0	0	0	0	0	0	0	0	0	0	0	0	0	0	0	0	0	0.23
17.0809	0	0	0	0	0	0	0	0	0	0	0	0	0	0	0	0	0	0.4595	0	0	0.459	0	0	0	0	0	0	0	0	0	0	0	0	0	0	0	0	0	0	0	0	0	0	0	0	0	0	0	0.689
17.0903	0	0	0	0	0	0	0	0	0	0	0	0	0	0	0	0	0	0.4595	0	0	0.459	0	0	0	0	0	0	0	0	0	0	0	0	0	0	0	0	0	0	0	0	0	0	0	0	0	0	0	0.23
17.0997	0	0	0	0	0	0	0	0	0	0	0	0	0	0	0	0	0	0.4595	0	0	0	0	0	0	0	0	0	0	0	0	0	0	0	0	0	0	0	0	0	0	0	0	0	0	0	0	0	0	0
17.109	0	0	0	0	0	0	0	0	0	0	0	0	0	0	0	0	0	0	0	0	0	0	0	0	0	0	0	0	0	0	0	0	0	0	0	0	0	0	0	0	0	0	0	0	0	0	0	0	0
17.1184	0	0	0	0	0	0	0	0	0	0	0	0	0	0	0	0	0	0	0	0	0	0	0	0	0	0	0	0	0	0	0	0	0	0	0	0	0	0	0	0	0	0	0	0	0	0	0	0	0
17.1278	0	0	0	0	0	0	0	0	0	0	0	0	0	0	0	0	0	0	0	0	0	0	0	0	0	0	0	0	0	0	0	0	0	0	0	0	0	0	0	0	0	0	0	0	0	0	0	0	0
17.1372	0	0	0	0	0	0	0	0	0	0	0	0	0	0	0	0	0	0	0	0	0	0	0	0	0	0	0	0	0	0	0	0	0	0	0	0	0	0	0	0	0	0	0	0	0	0	0	0	0
17.1465	0	0	0	0	0	0	0	0	0	0	0	0	0	0	0	0	0	0	0	0	0	0	0	0	0	0	0	0	0	0	0	0	0	0	0	0	0	0	0	0	0	0	0	0	0	0	0	0	0
17.1559	0	0	0	0	0	0	0	0	0	0	0	0	0	0	0	0	0	0	0	0	0	0	0	0	0	0	0	0	0	0	0	0	0	0	0	0	0	0	0	0	0	0	0	0	0	0	0	0	0
17.1653	0	0	0	0	0	0	0	0	0	0	0	0	0	0	0	0	0	0	0	0	0	0	0	0	0	0	0	0	0	0	0	0	0	0	0	0	0	0	0	0	0	0	0	0	0	0	0	0	0
17.1747	0	0	0	0	0	0	0	0	0	0	0	0	0	0	0	0	0	0.2297	0	0	0	0	0	0	0	0	0	0	0	0	0	0	0	0	0	0	0	0	0	0	0	0	0	0	0	0	0	0	0
17.184	0	0	0	0	0	0	0	0	0	0	0	0	0	0	0	0	0	0.9189	0	0	0	0	0	0	0	0	0	0	0	0	0	0	0	0	0	0	0	0	0	0	0	0	0	0	0	0	0	0	0
17.1934	0	0	0	0	0	0	0	0	0	0	0	0	0	0	0	0	0	0.6892	0	0	0	0	0	0	0	0	0	0	0	0	0	0	0	0	0	0	0	0	0	0	0	0	0	0	0	0	0	0	0
17.2028	0	0	0	0	0	0	0	0	0	0	0	0	0	0	0	0	0	0.4595	0	0	0	0	0	0	0	0	0	0	0	0	0	0	0	0	0	0	0	0	0	0	0	0	0	0	0	0	0	0	0.459
17.2122	0	0	0	0	0	0	0	0	0	0	0	0	0	0	0	0	0	0.6892	0.23	0	0	0	0	0.2297	0	0	0	0	0	0	0	0	0	0	0	0	0	0	0	0	0	0	0	0	0	0	0	0	0.23
17.2215	0	0	0	0	0	0	0	0	0	0	0	0	0	0	0	0	0	0.9189	0	0	0	0	0	0	0	0	0	0	0	0	0	0	0	0	0	0	0	0	0	0	0	0	0	0	0	0	0	0	0
17.2309	0	0	0	0	0	0	0	0	0	0	0	0	0	0	0	0	0	0.6892	0.23	0	0	0	0	0	0	0	0	0	0	0	0	0	0	0	0	0	0	0	0	0	0	0	0	0	0	0	0	0	0.23
17.2403	0	0	0	0	0	0	0	0	0	0	0	0	0	0	0	0	0	0.4595	0	0	0	0	0	0	0	0	0	0.23	0	0	0	0	0	0	0	0	0	0	0	0	0	0	0	0	0	0	0	0	0
17.2497	0	0	0	0	0	0	0	0	0	0	0	0	0	0	0	0	0	0	0	0	0	0	0	0	0	0	0	0	0	0	0	0	0	0	0	0	0	0	0	0	0	0	0	0	0	0	0	0	0
17.259	0	0	0	0	0	0	0	0	0	0	0	0	0	0	0	0	0	0.2297	0	0	0	0	0	0	0	0	0	0	0	0	0	0	0	0	0	0	0	0	0	0	0	0	0	0	0	0	0	0	0.23
17.2684	0	0	0	0	0	0	0	0	0	0	0	0	0	0	0	0	0	0.4595	0	0	0	0	0	0	0	0	0	0	0	0	0	0	0	0	0	0	0	0	0	0	0	0	0	0	0	0	0	0	0.459
17.2778	0	0	0	0	0	0	0	0	0	0	0	0	0	0	0	0	0	0	0	0	0	0	0	0	0	0	0	0	0	0	0	0	0	0	0	0	0	0	0	0	0	0	0	0	0	0	0	0	0.689
17.2872	0	0	0	0	0	0	0	0	0	0	0	0	0	0	0	0	0	0	0	0	0	0	0	0	0	0	0	0	0	0	0	0	0	0	0	0	0	0	0	0	0	0	0	0	0	0	0	0	0.459
17.2965	0	0	0	0	0	0	0	0	0	0	0	0	0	0	0	0	0	0	0	0	0	0	0	0	0	0	0	0	0	0	0	0	0	0	0	0	0	0	0	0	0	0	0	0	0	0	0	0	0.459
17.3059	0	0	0	0	0	0	0	0	0	0	0	0	0	0	0	0	0	0	0	0	0	0	0	0	0	0	0	0	0	0	0	0	0	0	0	0	0	0	0	0	0	0	0	0	0	0	0	0	0.919
17.3153	0	0	0	0	0	0	0	0	0	0	0	0	0	0	0	0	0	0	0	0	0	0	0	0	0	0	0	0	0	0	0	0	0	0	0	0	0	0	0	0	0	0	0	0	0	0	0	0	1.149
17.3247	0	0	0	0.689	0	0	0	0	0	0	0	0	0	0	0	0	0	0	0	0	0	0	0	0	0	0	0	0	0	0	0	0	0	0	0	0	0	0	0	0	0	0	0	0	0	0	0	0	1.378
17.334	0	0	0	0.689	0	0	0	0	0	0	0	0	0	0	0	0	0	0	0	0	0	0	0	0	0	0	0	0	0	0	0	0	0	0	0	0	0	0	0	0	0	0	0	0	0	0	0	0	1.838
17.3434	0	0	0	0.23	0	0	0	0	0	0	0	0	0	0	0	0	0	0	0	0	0	0	0	0	0	0	0	0	0	0	0	0	0	0	0	0	0	0	0	0	0	0	0	0	0	0	0	0	1.838
17.3528	0	0	0	0	0	0	0	0	0	0	0	0	0	0	0	0	0	0	0	0	0	0	0	0	0	0	0	0	0	0	0	0	0	0	0	0	0	0	0	0	0	0	0	0	0	0	0	0	1.838
17.3622	0	0	0	0	0	0	0	0	0	0	0	0	0	0	0	0	0	0	0.23	0	0	0	0	0	0	0	0	0	0	0	0	0	0	0	0	0	0	0	0	0	0	0	0	0	0	0	0	0	1.838
17.3715	0.2297	0	0	0	0	0	0	0	0	0	0	0	0	0	0	0	0	0	0	0	0	0	0	0	0	0	0	0	0	0	0	0	0	0	0	0	0	0	0	0	0	0	0	0	0	0	0	0	1.838
17.3809	0.2297	0	0	0	0	0	0	0	0	0	0	0	0	0	0	0	0	0	0	0	0	0	0	0	0	0	0	0	0	0	0	0	0	0	0	0	0	0	0	0	0	0	0	0	0	0	0	0	1.838
17.3903	0.2297	0	0	0	0	0	0	0	0	0	0	0	0	0	0	0	0	0	0	0	0	0	0	0	0	0	0	0	0	0	0	0	0	0	0	0	0	0	0	0	0	0	0	0	0	0	0	0	1.608
17.3997	0	0	0	0	0	0	0	0	0	0	0	0	0	0	0	0	0	0	0	0	0	0	0	0	0	0	0	0	0	0	0	0	0	0	0	0	0	0	0	0	0	0	0	0	0	0	0	0	1.378
17.409	0	0	0	0	0	0	0	0	0	0	0	0	0	0	0	0	0	0	0	0	0	0	0	0	0	0	0	0	0	0	0	0	0	0	0	0	0	0	0	0	0	0	0	0	0	0	0	0	1.608
17.4184	0	0	0	0	0	0	0	0	0	0	0	0	0	0	0	0	0	0	0	0	0	0	0	0	0	0	0	0	0	0	0	0	0	0	0	0	0	0	0	0	0	0	0	0	0	0	0	0	1.378
17.4278	0	0	0	0	0	0	0	0	0	0	0	0	0	0	0	0	0	0	0	0	0	0	0	0	0	0	0	0	0	0	0	0	0	0	0	0	0	0	0	0	0	0	0	0	0	0	0	0	0.919
17.4372	0	0	0	0	0	0	0	0	0	0	0	0	0	0	0	0	0	0	0	0	0	0	0	0	0	0	0	0	0	0	0	0	0	0	0	0	0	0	0	0	0	0	0	0	0	0	0	0	0.23
17.4465	0	0	0	0	0	0	0	0	0	0	0	0	0	0	0	0	0	0	0	0	0	0	0	0	0	0	0	0	0	0	0	0	0	0	0	0	0	0	0	0	0	0	0	0	0	0	0	0	0.23
17.4559	0	0	0	0	0	0	0	0	0	0	0	0	0	0	0	0	0	0	0	0	0	0	0	0	0	0	0	0	0	0	0	0	0	0	0	0	0	0	0	0	0	0	0	0	0	0	0	0	0.689
17.4653	0	0	0	0	0	0	0	0	0	0	0	0	0	0	0	0	0	0	0	0	0	0	0	0	0	0	0	0	0	0	0	0	0	0	0	0	0	0	0	0	0	0	0	0	0	0	0	0	0.459
17.4747	0	0	0	0	0	0	0	0	0	0	0	0	0	0	0	0	0	0	0	0	0	0	0	0	0	0	0	0	0	0	0	0	0	0	0	0	0	0	0	0	0	0	0	0	0	0	0	0	0.23
17.484	0	0	0	0	0	0	0	0.23	0	0	0	0	0	0	0	0	0	0	0	0	0	0	0	0	0	0	0	0	0	0	0	0	0	0	0	0	0	0	0	0	0	0	0	0	0	0	0	0	0.23
17.4934	0	0	0	0	0	0	0	0	0	0	0	0	0	0	0	0	0	0	0	0	0	0	0	0	0	0	0	0	0	0	0	0	0	0	0	0	0	0	0	0	0	0	0	0	0	0	0	0	0
17.5028	0	0	0	0	0	0	0	0	0	0	0	0	0	0	0	0	0	0	0	0	0	0	0	0	0	0	0	0	0	0	0	0	0	0	0	0	0	0	0	0	0	0	0	0	0	0	0	0	0
17.5122	0	0	0	0	0	0	0	0	0	0	0	0	0	0	0	0	0	0	0	0	0	0	0	0	0	0	0	0	0	0	0	0	0	0	0	0	0	0	0	0	0	0	0	0	0	0	0	0	0
17.5215	0	0	0	0	0	0	0	0	0	0	0	0	0	0	0	0	0	0	0	0	0	0	0	0	0	0	0	0	0	0	0	0	0	0	0	0	0	0	0	0	0	0	0	0	0	0	0	0	0
17.5309	0	0	0	0	0	0	0	0	0	0	0	0	0	0	0	0	0	0	0	0	0	0	0	0	0	0	0	0	0	0	0	0	0	0	0	0	0	0	0	0	0	0	0	0	0	0	0	0	0
17.5403	0	0	0	0	0	0	0	0	0	0	0	0	0	0	0	0	0	0	0	0	0	0	0	0	0	0	0	0	0	0	0	0	0	0	0	0	0	0	0	0	0	0	0	0	0	0	0	0	0
17.5497	0	0	0	0	0	0	0	0	0	0	0	0	0	0	0	0	0	0	0	0	0	0	0	0	0	0	0	0	0	0	0	0	0	0	0	0	0	0	0	0	0	0	0	0	0	0	0	0	0
17.559	0	0	0	0	0	0	0	0	0	0	0	0	0	0	0	0	0	0	0	0	0	0	0	0	0	0	0	0	0	0	0	0	0	0	0	0	0	0	0	0	0	0	0	0	0	0	0	0	0
17.5684	0	0	0	0	0	0	0	0	0	0	0	0	0	0	0	0	0	0	0	0	0	0	0	0	0	0	0	0	0	0	0	0	0	0	0	0	0	0	0	0	0	0	0	0	0	0	0	0	0
17.5778	0	0	0	0	0	0	0	0	0	0	0	0	0	0	0	0	0	0	0	0	0	0	0	0	0	0	0	0	0	0	0	0	0	0	0	0	0	0	0	0	0	0	0	0	0	0	0	0	0
17.5872	0	0	0	0	0	0	0	0	0	0	0	0	0	0	0	0	0	0	0	0	0	0	0	0	0	0	0	0	0	0	0	0	0	0	0	0	0	0	0	0	0	0	0	0	0	0	0	0	0
17.5965	0	0	0	0	0	0	0	0	0	0	0	0	0	0	0	0	0	0	0	0	0	0	0	0	0	0	0	0	0	0	0	0	0	0	0	0	0	0	0	0	0	0	0	0	0	0	0	0	0
17.6059	0	0	0	0	0	0	0	0	0	0	0	0	0	0	0	0	0	0	0	0	0	0	0	0	0	0	0	0	0	0	0	0	0	0	0	0	0	0	0	0	0	0	0	0	0	0	0	0	0
17.6153	0	0	0	0	0	0	0	0	0	0	0	0	0	0	0	0	0	0	0	0	0	0	0	0	0	0	0	0	0	0	0	0	0	0	0	0	0	0	0	0	0	0	0	0	0	0	0	0	0
17.6247	0	0	0	0	0	0	0	0	0	0	0	0	0	0	0	0	0	0	0	0	0	0	0	0	0	0	0	0	0	0	0	0	0	0	0	0	0	0	0	0	0	0	0	0	0	0	0	0	0
17.634	0	0	0	0	0	0	0	0	0	0	0	0	0	0	0	0	0	0	0	0	0	0	0	0	0	0	0	0	0	0	0	0	0	0	0	0	0	0	0	0	0	0	0	0	0	0	0	0	0
17.6434	0	0	0	0	0	0	0	0	0	0	0	0	0	0	0	0	0	0	0	0	0	0	0	0	0	0	0	0	0	0	0	0	0	0	0	0	0	0	0	0	0	0	0	0	0	0	0	0	0.23
17.6528	0	0	0	0	0	0	0	0	0	0	0	0	0	0	0	0	0	0	0	0	0	0	0	0	0	0	0	0	0	0	0	0	0	0	0	0	0	0	0	0	0	0	0	0	0	0	0	0	0.459
17.6622	0	0	0	0	0	0	0	0	0	0	0	0	0	0	0	0	0	0	0	0	0	0	0	0	0	0	0	0	0	0	0	0	0	0	0	0	0	0	0	0	0	0	0	0	0	0	0	0	0
17.6715	0	0	0	0	0	0	0	0	0	0	0	0	0	0	0	0	0	0	0	0	0	0	0	0	0	0	0	0	0	0	0	0	0	0	0	0	0	0	0	0	0	0	0	0	0	0	0	0	0.23
17.6809	0	0	0	0	0	0	0	0	0	0	0	0	0	0	0	0	0	0.2297	0	0	0	0	0	0	0	0	0	0	0	0	0	0	0	0	0	0	0	0	0	0	0	0	0	0	0	0	0	0	0
17.6903	0	0	0	0	0	0	0	0	0	0	0	0	0	0	0	0	0	0	0	0	0	0	0	0	0	0	0	0	0	0	0	0	0	0	0	0	0	0	0	0	0	0	0	0	0	0	0	0	0
17.6997	0	0	0	0	0	0	0	0	0	0	0	0	0	0	0	0	0	0.2297	0	0	0	0	0	0	0	0	0	0	0	0	0	0	0	0	0	0	0	0	0	0	0	0	0	0	0	0	0	0	0
17.709	0	0	0	0	0	0	0	0	0	0	0	0	0	0	0	0	0	0	0	0	0	0	0	0	0	0	0	0	0	0	0	0	0	0	0	0	0	0	0	0	0	0	0	0	0	0	0	0	0.23
17.7184	0	0	0	0	0	0	0	0	0	0	0	0	0	0	0	0	0	0	0	0	0	0	0	0	0	0	0	0	0	0	0	0	0	0	0	0	0	0	0	0	0	0	0	0	0	0	0	0	1.149
17.7278	0	0	0	0	0	0	0	0	0	0	0	0	0	0	0	0	0	0	0	0	0	0	0	0	0	0	0	0	0	0	0	0	0	0	0	0	0	0	0	0	0	0	0	0	0	0	0	0	1.378
17.7372	0	0	0	0	0	0	0	0	0	0	0	0	0	0	0	0	0	0	0	0	0	0	0	0	0	0	0	0	0	0	0	0	0	0	0	0	0	0	0	0	0	0	0	0	0	0	0	0	2.297
17.7465	0	0	0	0	0	0	0	0	0	0	0	0	0	0	0	0	0	0	0	0	0	0	0	0	0	0	0	0	0	0	0	0	0	0	0	0	0	0	0	0	0	0	0	0	0	0	0	0	2.986
17.7559	0	0	0	0	0	0	0	0	0	0	0	0	0	0	0	0	0	0	0	0	0	0	0	0	0	0	0	0	0	0	0	0	0	0	0	0	0	0	0	0	0	0	0	0	0	0	0	0	1.608
17.7653	0	0	0	0	0	0	0	0	0	0	0	0	0	0	0	0	0	0	0	0	0	0	0	0	0	0	0	0	0	0	0	0	0	0	0	0	0	0	0	0.23	0	0	0	0	0	0	0	0	1.149
17.7747	0	0	0	0	0	0	0	0	0	0	0	0	0	0	0	0	0	0.2297	0	0	0	0	0	0	0	0	0	0	0	0	0	0	0	0	0	0	0	0	0	0.459	0	0	0	0	0	0	0	0	0.919
17.784	0	0	0	0	0	0	0	0	0	0	0	0	0	0	0	0	0	0.4595	0	0	0	0	0	0	0	0	0	0	0	0	0	0	0	0	0	0	0	0	0	0	0	0	0	0	0	0	0	0	0.23
17.7934	0	0	0	0	0	0	0	0	0	0	0	0	0	0	0	0	0	0.4595	0	0	0	0	0	0	0	0	0	0	0	0	0	0	0	0	0	0	0	0	0	0	0	0	0	0	0	0	0	0	0.919
17.8028	0	0	0	0	0	0	0	0	0	0	0	0	0	0	0	0	0	1.1486	0	0	0	0	0	0	0	0	0	0	0	0	0	0	0	0	0	0	0	0	0	0	0	0	0	0	0	0	0	0	1.838
17.8122	0	0	0	0	0	0	0	0	0	0	0	0	0	0	0	0	0	0.9189	0	0	0	0	0	0	0	0	0	0	0	0	0	0	0	0	0	0	0	0	0	0	0	0	0	0	0	0	0	0	2.068
17.8215	0	0	0	0	0	0	0	0	0	0	0	0	0	0	0	0	0	0.4595	0	0	0	0	0	0	0	0	0	0	0	0	0	0	0	0	0	0	0	0	0	0	0	0	0	0	0	0	0	0	2.986
17.8309	0	0	0	0	0	0	0	0	0	0	0	0	0	0	0	0	0	0.2297	0	0	0	0	0	0	0	0	0	0	0	0	0	0	0	0	0	0	0	0	0	0	0	0	0	0	0	0	0	0	3.216
17.8403	0	0	0	0	0	0	0	0	0	0	0	0	0	0	0	0	0	0.4595	0	0	0	0	0	0	0	0	0	0	0	0	0	0	0	0	0	0	0	0	0	0	0	0	0	0	0	0	0	0	3.216
17.8497	0	0	0	0	0	0	0	0	0	0	0	0	0	0	0	0	0	0.2297	0	0	0	0	0	0	0	0	0	0	0	0	0	0	0	0	0	0	0	0	0	0	0	0	0	0	0	0	0	0	2.986
17.859	0	0	0	0	0	0	0	0	0	0	0	0	0	0	0	0	0	0	0	0	0	0	0	0	0	0	0	0	0	0	0	0	0	0	0	0	0	0	0	0	0	0	0	0	0	0	0	0	2.757
17.8684	0	0	0	0	0	0	0	0	0	0	0	0	0	0	0	0	0	0	0	0	0	0	0	0	0	0	0	0	0	0	0	0	0	0	0	0	0	0	0	0	0	0	0	0	0	0	0	0	2.297
17.8778	0	0	0	0	0	0	0	0	0	0	0	0	0	0	0	0	0	0	0	0	0	0	0	0	0	0	0	0	0	0	0	0	0	0	0	0	0	0	0	0	0	0	0	0	0	0	0	0	2.757
17.8871	0	0	0	0	0	0	0	0	0	0	0	0	0	0	0	0	0	0	0	0	0	0	0	0	0	0	0	0	0	0	0	0	0	0	0	0	0	0	0	0	0	0	0	0	0	0	0	0	2.986
17.8965	0	0	0	0	0	0	0	0	0	0	0	0	0	0	0	0	0	0	0	0	0	0	0	0	0	0	0	0	0	0	0	0	0	0	0	0	0	0	0	0	0	0	0	0	0	0	0	0	3.216
17.9059	0	0	0	0	0	0	0	0	0	0	0	0	0	0	0	0	0	0	0	0	0	0	0	0	0	0	0	0	0	0	0	0	0	0	0	0	0	0	0	0	0	0	0	0	0	0	0	0	2.757
17.9153	0	0	0	0	0	0	0	0	0	0	0	0	0	0	0	0	0	0	0	0	0	0	0	0	0	0	0	0	0	0	0	0	0	0	0	0	0	0	0	0	0	0	0	0	0	0	0	0	2.757
17.9247	0	0	0	0	0	0	0	0	0	0	0	0	0	0	0	0	0	0	0	0	0	0	0	0	0	0	0	0	0	0	0	0	0	0	0	0	0	0	0	0	0	0	0	0	0	0	0	0	2.757
17.934	0	0	0	0	0	0	0	0	0	0	0	0	0	0	0	0	0	0	0	0	0	0	0	0	0	0	0	0	0	0	0	0	0	0	0	0	0	0	0	0	0	0	0	0	0	0	0	0	2.297
17.9434	0	0	0	0	0	0	0	0	0	0	0	0	0	0	0	0	0	0	0	0	0	0	0	0	0	0	0	0	0	0	0	0	0	0	0	0	0	0	0	0	0	0	0	0	0	0	0	0	2.527
17.9528	0	0	0	0	0	0	0	0	0	0	0	0	0	0	0	0	0	0	0	0	0	0	0	0	0	0	0	0	0	0	0	0	0	0	0	0	0	0	0	0	0	0	0	0	0	0	0	0	2.986
17.9621	0	0	0	0	0	0	0	0	0	0	0	0	0	0	0	0	0	0	0	0	0	0	0	0	0	0	0	0	0	0	0	0	0	0	0	0	0	0	0	0	0	0	0	0	0	0	0	0	3.676
17.9715	0.2297	0	0	0	0	0	0	0	0	0	0	0	0	0	0	0	0	0	0	0	0	0	0	0	0	0	0	0	0	0	0	0	0	0	0	0	0	0	0	0	0	0	0	0	0	0	0	0	4.595
17.9809	0	0	0	0	0	0	0	0	0	0	0	0	0	0	0	0	0	0	0	0	0	0	0	0	0	0	0	0	0	0	0	0	0	0	0	0	0	0	0	0	0	0	0	0	0	0	0	0	4.135
17.9903	0	0	0	0	0	0	0	0	0	0	0	0	0	0	0	0	0	0	0	0	0	0	0	0	0	0	0	0	0	0	0	0	0	0	0	0	0	0	0	0	0	0	0	0	0	0	0	0	4.595
17.9996	0	0	0	0	0	0	0	0	0	0	0	0	0	0	0	0	0	0	0	0	0	0	0	0	0	0	0	0	0	0	0	0	0	0	0	0	0	0	0	0	0	0	0	0	0	0	0	0	4.365
18.009	0	0	0	0	0	0	0	0	0	0	0	0	0	0	0	0	0	0	0	0	0	0	0	0	0	0	0	0	0	0	0	0	0	0	0	0	0	0	0	0	0	0	0	0	0	0	0	0	4.135
18.0184	0	0	0	0	0	0	0	0	0	0	0	0	0	0	0	0	0	0.2297	0	0	0	0	0	0	0	0	0	0	0	0	0	0	0	0	0	0	0	0	0	0	0	0	0	0	0	0	0	0	4.824
18.0278	0	0	0	0	0	0	0	0	0	0	0	0	0	0	0	0	0	0.4595	0	0	0	0	0	0	0	0	0	0	0	0	0	0	0	0	0	0	0	0	0	0	0	0	0	0	0	0	0	0	4.365
18.0371	0	0	0	0	0	0	0	0	0	0	0	0	0	0	0	0	0	0.6892	0	0	0	0	0	0	0	0	0	0	0	0	0	0	0	0	0	0	0	0	0	0	0	0	0	0	0	0	0	0	3.905
18.0465	0	0	0	0	0	0	0	0	0	0	0	0	0	0	0	0	0	0.6892	0	0	0	0	0	0	0	0	0	0	0	0	0	0	0	0	0	0	0	0	0	0	0	0	0	0	0	0	0	0	3.905
18.0559	0	0	0	0	0	0	0	0	0	0	0	0	0	0	0	0	0	0.2297	0	0	0	0	0	0	0	0	0	0	0	0	0	0	0	0	0	0	0	0	0	0	0	0	0	0	0	0	0	0	2.986
18.0653	0	0	0	0	0	0	0	0	0	0	0	0	0	0	0	0	0	0	0	0	0	0	0	0	0	0	0	0	0	0	0	0	0	0	0	0	0	0	0	0	0	0	0	0	0	0	0	0	3.216
18.0746	0	0	0	0	0	0	0	0	0	0	0	0	0	0	0	0	0	0	0	0	0	0	0	0	0	0	0	0	0	0	0	0	0	0	0	0	0	0	0	0	0	0	0	0	0	0	0	0	3.676
18.084	0	0	0	0	0	0	0	0	0	0	0	0	0	0	0	0	0	0	0	0	0	0	0	0	0	0	0	0	0	0	0	0	0	0	0	0	0	0	0	0	0	0	0	0	0	0	0	0	2.527
18.0934	0	0	0	0	0	0	0	0	0	0	0	0	0	0	0	0	0	0	0	0	0	0	0	0	0	0	0	0	0	0	0	0	0	0	0	0	0	0	0	0	0	0	0	0	0	0	0	0	2.068
18.1028	0	0	0	0	0	0	0	0	0	0	0	0	0	0	0	0	0	0	0	0	0	0	0	0	0	0	0	0	0	0	0	0	0	0	0	0	0	0	0	0	0	0	0	0	0	0	0	0	1.608
18.1121	0	0	0	0	0	0	0	0	0	0	0	0	0	0	0	0	0	0	0	0	0	0	0	0	0	0	0	0	0	0	0	0	0	0	0	0	0	0	0	0	0	0	0	0	0	0	0	0	0.689
18.1215	0	0	0	0	0	0	0	0	0	0	0	0	0	0	0	0	0	0	0	0	0	0	0	0	0	0	0	0	0	0	0	0	0	0	0	0	0	0	0	0	0	0	0	0	0	0	0	0	1.608
18.1309	0	0	0	0	0	0	0	0	0	0	0	0	0	0	0	0	0	0	0	0	0	0	0	0	0	0	0	0	0	0	0	0	0	0	0	0	0	0	0	0	0	0	0	0	0	0	0	0	2.297
18.1403	0	0	0	0	0	0	0	0	0	0	0	0	0	0	0	0	0	0.9189	0	0	0	0	0	0	0	0	0	0	0	0	0	0	0	0	0	0	0	0	0	0	0	0	0	0	0	0	0	0	2.757
18.1496	0	0	0	0	0	0	0	0	0	0	0	0	0	0	0.23	0	0	0.9189	0	0	0	0	0	0	0	0	0	0	0	0	0	0	0	0	0	0	0	0	0	0	0	0	0	0	0	0	0	0	2.986
18.159	0	0	0	0	0	0	0	0	0	0	0	0	0	0	0.23	0	0	0.2297	0	0	0	0	0	0	0	0	0	0	0	0	0	0	0	0	0	0	0	0	0	0	0	0	0	0	0	0	0	0	3.446
18.1684	0	0	0	0	0	0	0	0	0	0	0	0	0	0	0	0	0	0	0	0	0	0	0	0	0	0	0	0	0	0	0	0	0	0	0	0	0	0	0	0	0	0	0	0	0	0	0	0	3.676
18.1778	0	0	0	0	0	0	0	0	0	0	0	0	0	0	0	0	0	0	0	0	0	0	0	0	0	0	0	0	0	0	0	0	0	0	0	0	0	0	0	0	0	0	0	0	0	0	0	0	2.986
18.1871	0	0	0	0	0	0	0	0	0	0	0	0	0	0	0	0	0	0	0	0	0	0	0	0	0	0	0	0	0	0	0	0	0	0	0	0	0	0	0	0	0	0	0	0	0	0	0	0	3.446
18.1965	0	0	0	0	0	0	0	0	0	0	0	0	0	0	0	0	0	0	0	0	0	0	0	0	0	0	0	0	0	0	0	0	0	0	0	0	0	0	0	0	0	0	0	0	0	0	0	0	3.216
18.2059	0	0	0	0	0	0	0	0	0	0	0	0	0	0	0	0	0	0	0	0	0	0	0	0	0	0	0	0	0	0	0	0	0	0	0	0	0	0	0	0	0	0	0	0	0	0	0	0	2.527
18.2153	0	0	0	0	0	0	0	0	0	0	0	0	0	0	0	0	0	0	0	0	0	0	0	0	0	0	0	0	0	0	0	0	0	0	0	0	0	0	0	0	0	0	0	0	0	0	0	0	2.297
18.2246	0	0	0	0	0	0	0	0	0	0	0	0	0	0	0	0	0	0	0	0	0	0	0	0	0	0	0	0	0	0	0	0	0	0	0	0	0	0	0	0	0	0	0	0	0	0	0	0	2.527
18.234	0	0	0	0	0	0	0	0	0	0	0	0	0	0	0	0	0	0	0	0	0	0	0	0	0	0	0	0	0	0	0	0	0	0	0	0	0	0	0	0	0	0	0	0	0	0	0	0	2.297
18.2434	0	0	0	0	0	0	0	0	0	0	0	0	0	0	0	0	0	0	0	0	0	0	0	0	0	0	0	0	0	0	0	0	0	0	0	0	0	0	0	0	0	0	0	0	0	0	0	0	2.068
18.2528	0	0	0	0	0	0	0	0	0	0	0	0	0	0	0	0	0	0	0	0	0	0	0	0	0	0	0	0	0	0	0	0	0	0	0	0	0	0	0	0	0	0	0	0	0	0	0	0	2.527
18.2621	0	0	0	0	0	0	0	0	0	0	0	0	0	0	0	0	0	0	0	0	0	0	0	0	0	0	0	0	0	0	0	0	0	0	0	0	0	0	0	0	0	0	0	0	0	0	0	0	2.527
18.2715	0	0	0	0	0	0	0	0	0	0	0	0	0	0	0	0	0	0	0	0	0	0	0	0	0	0	0	0	0	0	0	0	0	0	0	0	0	0	0	0	0	0	0	0	0	0	0	0	2.068
18.2809	0	0	0	0	0	0	0	0	0	0	0	0	0	0	0	0	0	0	0	0	0	0	0	0	0	0	0	0	0	0	0	0	0	0	0	0	0	0	0	0	0	0	0	0	0	0	0	0	1.838
18.2903	0	0	0	0	0	0	0	0	0	0	0	0	0	0	0	0	0	0.2297	0	0	0	0	0	0	0	0	0	0	0	0	0	0	0	0	0	0	0	0	0	0	0	0	0	0	0	0	0	0	1.838
18.2996	0	0	0	0	0	0	0	0	0	0	0	0	0	0	0	0	0	0.9189	0	0	0	0	0	0	0	0	0	0	0	0	0	0	0	0	0	0	0	0	0	0	0	0	0	0	0	0	0	0	1.378
18.309	0	0	0	0	0	0	0	0	0	0	0	0	0	0	0	0	0	0.9189	0	0	0	0	0	0	0	0	0	0	0	0	0	0	0	0	0	0	0	0	0	0	0	0	0	0	0	0	0	0	1.149
18.3184	0	0	0	0	0	0	0	0	0	0	0	0	0	0	0	0	0	0.6892	0	0	0	0	0	0	0	0	0	0	0	0	0	0	0	0	0	0	0	0	0	0	0	0	0	0	0	0	0	0	1.378
18.3278	0	0	0	0	0	0	0	0	0	0	0	0	0	0	0	0	0	0.2297	0	0	0	0	0	0	0	0	0	0	0	0	0	0	0	0	0	0	0	0	0	0	0	0	0	0	0	0	0	0	0.919
18.3371	0	0	0	0	0	0	0	0	0	0	0	0	0	0	0	0	0	0	0	0	0	0	0	0	0	0	0	0	0	0	0	0	0	0	0	0	0	0	0	0	0	0	0	0	0	0	0	0	0.919
18.3465	0	0	0	0	0	0	0	0	0	0	0	0	0	0	0	0	0	0	0	0	0	0	0	0	0	0	0	0	0	0	0	0	0	0	0	0	0	0	0	0	0	0	0	0	0	0	0	0	1.149
18.3559	0	0	0	0	0	0	0	0	0	0	0	0	0	0	0	0	0	0.2297	0	0	0	0	0	0	0	0	0	0	0	0	0	0	0	0	0	0	0	0	0	0	0	0	0	0	0	0	0	0	1.378
18.3653	0	0	0	0	0	0	0	0	0	0	0	0	0	0	0	0	0	0.4595	0	0	0	0	0	0	0	0	0	0	0	0	0	0	0	0	0	0	0	0	0	0	0	0	0	0	0	0	0	0	0.919
18.3746	0	0	0	0	0	0	0	0	0	0	0	0	0	0	0	0	0	0.6892	0	0	0	0	0	0	0	0	0	0	0	0	0	0	0	0	0	0	0	0	0	0	0	0	0	0	0	0	0	0	0.919
18.384	0	0	0	0	0	0	0	0	0	0	0	0	0	0	0	0	0	0	0	0	0	0	0	0	0	0	0	0	0	0	0	0	0	0	0	0	0	0	0	0	0	0	0	0	0	0	0	0	1.608
18.3934	0	0	0	0	0	0	0	0	0	0	0	0	0	0	0	0	0	0	0	0	0	0	0	0	0	0	0	0	0	0	0	0	0	0	0	0	0	0	0	0	0	0	0	0	0	0	0	0	2.068
18.4028	0	0	0	0	0	0	0	0	0	0	0	0	0	0	0	0	0	0	0	0	0	0	0	0	0	0	0	0	0	0	0	0	0	0	0	0	0	0	0	0	0	0	0	0	0	0	0	0	1.608
18.4121	0	0	0	0	0	0	0	0	0	0	0	0	0	0	0	0	0	0.2297	0	0	0	0	0	0	0	0	0	0	0	0	0	0	0	0	0	0	0	0	0	0	0	0	0	0	0	0	0	0	2.068
18.4215	0	0	0	0	0	0	0	0	0	0	0	0	0	0	0	0	0	0	0	0	0	0	0	0	0	0	0	0	0	0	0	0	0	0	0	0	0	0	0	0	0	0	0	0	0	0	0	0	2.757
18.4309	0	0	0	0	0	0	0	0	0	0	0	0	0	0	0	0	0	0	0	0	0	0	0	0	0	0	0	0	0	0	0	0	0	0	0	0	0	0	0	0	0	0	0	0	0	0	0	0	3.676
18.4403	0	0	0	0	0	0	0	0	0	0	0	0	0	0	0	0	0	0	0	0	0	0	0	0	0	0	0	0	0	0	0	0	0	0	0	0	0	0	0	0	0	0	0	0	0	0	0	0	3.905
18.4496	0	0	0	0	0	0	0	0	0	0	0	0	0	0	0	0	0	0	0	0	0	0	0	0	0	0	0	0	0	0	0	0	0	0	0	0	0	0	0	0	0	0	0	0	0	0	0	0	3.905
18.459	0	0	0	0	0	0	0	0	0	0	0	0	0	0	0	0	0	0	0	0	0	0	0	0	0	0	0	0	0	0	0	0	0	0	0	0	0	0	0	0	0	0	0	0	0	0	0	0	3.446
18.4684	0	0	0	0	0	0	0	0	0	0	0	0	0	0	0	0	0	0	0	0	0	0	0	0	0	0	0	0	0	0	0	0	0	0	0	0	0	0	0	0	0	0	0	0	0	0	0	0	3.905
18.4778	0	0	0	0	0	0	0	0	0	0	0	0	0	0	0	0	0	0	0	0	0	0	0	0	0	0	0	0	0	0	0	0	0	0	0	0	0	0	0	0	0	0	0	0	0	0	0	0	3.905
18.4871	0	0	0	0	0	0	0	0	0	0	0	0	0	0	0	0	0	0	0	0	0	0	0	0	0	0	0	0	0	0	0	0	0	0	0	0	0	0	0	0	0	0	0	0	0	0	0	0	2.986
18.4965	0	0	0	0	0	0	0	0	0	0	0	0	0	0	0	0	0	0	0	0	0	0	0	0	0	0	0	0	0	0	0	0	0	0	0	0	0	0	0	0	0	0	0	0	0	0	0	0	3.905
18.5059	0	0	0	0	0	0	0	0	0	0	0	0	0	0	0	0	0	0	0	0	0	0	0	0	0	0	0	0	0	0	0	0	0	0	0	0	0	0	0	0	0	0	0	0	0	0	0	0	4.365
18.5153	0	0	0	0	0	0	0	0	0	0	0	0	0	0.23	0	0	0	0	0	0	0	0	0	0	0	0	0	0	0	0	0	0	0	0	0	0	0	0	0	0	0	0	0	0	0	0	0	0	3.676
18.5246	0	0	0	0	0	0	0	0	0	0	0	0	0	0.459	0	0	0	0	0	0	0	0	0	0	0	0	0	0	0	0	0	0	0	0	0	0	0	0	0	0	0	0	0	0	0	0	0	0	2.757
18.534	0	0	0	0	0	0	0	0	0	0	0	0	0	0.689	0	0	0	0	0	0	0	0	0	0	0	0	0	0	0	0	0	0	0	0	0	0	0	0	0	0	0	0	0	0	0	0	0	0	2.757
18.5434	0	0	0	0	0	0	0	0	0	0	0	0	0	0.459	0	0	0	0	0	0	0	0	0	0	0	0	0	0	0	0	0	0	0	0	0	0	0	0	0	0	0	0	0	0	0	0	0	0	3.676
18.5528	0	0	0	0	0	0	0	0	0	0	0	0	0	0.459	0	0	0	0.6892	0	0	0	0	0	0	0	0	0	0	0	0	0	0	0	0	0	0	0	0	0	0	0	0	0	0	0	0	0	0	3.905
18.5621	0	0	0	0	0	0	0	0	0	0	0	0	0	0.23	0	0	0	0.2297	0	0	0	0	0	0	0	0	0	0	0	0	0	0	0	0	0	0	0	0	0	0	0	0	0	0	0	0	0	0	4.365
18.5715	0	0	0	0	0	0	0	0	0	0	0	0	0	0	0	0	0	0	0	0	0	0	0	0	0	0	0	0	0	0	0	0	0	0	0	0	0	0	0	0	0	0	0	0	0	0	0	0	4.595
18.5809	0	0	0	0	0	0	0	0	0	0	0	0	0	0	0	0	0	0	0	0	0	0	0	0.4595	0	0	0	0	0	0	0	0	0	0	0	0	0	0	0	0	0	0	0	0	0	0	0	0	3.905
18.5903	0	0	0	0	0	0	0	0	0	0	0	0	0	0	0	0	0	0	0	0	0	0	0	0.4595	0	0	0	0	0	0	0	0	0	0	0	0	0	0	0	0	0	0	0	0	0	0	0	0	4.135
18.5996	0	0	0	0	0	0	0	0	0	0	0	0	0	0	0	0	0	0	0	0	0	0	0	0.4595	0	0	0	0	0	0	0	0	0	0	0	0	0	0	0	0	0	0	0	0	0	0	0	0	4.135
18.609	0	0	0	0	0	0	0	0	0	0	0	0	0	0	0	0	0	0	0	0	0	0	0	0.4595	0	0	0	0	0	0	0	0	0	0	0	0	0	0	0	0	0	0	0	0	0	0	0	0	4.824
18.6184	0	0	0	0	0	0	0	0	0	0	0	0	0	0	0	0	0	0	0	0	0	0	0	0	0	0	0	0	0	0	0	0	0	0	0	0	0	0	0	0	0	0	0	0	0	0	0	0	4.135
18.6278	0	0	0	0	0	0	0	0	0	0	0	0	0	0	0	0	0	0	0	0	0	0	0	0	0	0	0	0	0	0	0	0	0	0	0	0	0	0	0	0	0	0	0	0	0	0	0	0	3.676
18.6371	0	0	0	0	0	0	0	0	0	0	0	0	0	0	0	0	0	0	0	0	0	0	0	0	0	0	0	0	0	0	0	0	0	0	0	0	0	0	0	0	0	0	0	0	0	0	0	0	2.986
18.6465	0	0	0	0	0	0	0	0	0	0	0	0	0	0	0	0	0	0	0	0	0	0	0	0	0	0	0	0	0	0	0	0	0	0	0	0	0	0	0	0	0	0	0	0	0	0	0	0	3.216
18.6559	0	0	0	0	0	0	0	0	0	0	0	0	0	0	0	0	0	0	0	0	0	0	0	0	0	0	0	0	0	0	0	0	0	0	0	0	0	0	0	0	0	0	0	0	0	0	0	0	3.216
18.6653	0	0	0	0	0	0	0	0	0	0	0	0	0	0	0	0	0	0	0	0	0	0	0	0	0	0	0	0	0	0	0	0	0	0	0	0	0	0	0	0	0	0	0	0	0	0	0	0	3.216
18.6746	0	0	0	0	0	0	0	0	0	0	0	0	0	0	0	0	0	0	0	0	0	0	0	0	0	0	0	0	0	0	0	0	0	0	0	0	0	0	0	0	0	0	0	0	0	0	0	0	3.216
18.684	0	0	0	0	0	0	0	0	0	0	0	0	0	0	0	0	0	0	0	0	0	0	0	0	0	0	0	0	0	0	0	0	0	0	0	0	0	0	0	0	0	0	0	0	0	0	0	0	2.757
18.6934	0	0	0	0	0	0	0	0	0	0	0	0	0	0	0	0	0	0	0	0	0	0	0	0	0	0	0	0	0	0	0	0	0	0	0	0	0	0	0	0	0	0	0	0	0	0	0	0	2.297
18.7028	0	0	0	0	0	0	0	0	0	0	0	0	0	0	0	0	0	0	0	0	0	0	0	0	0	0	0	0	0	0	0	0	0	0	0	0	0	0	0	0	0	0	0	0	0	0	0	0	2.527
18.7121	0	0	0	0	0	0	0	0	0	0	0	0	0	0	0	0	0	0	0	0	0	0	0	0	0	0	0	0	0	0	0	0	0	0	0	0	0	0	0	0	0	0	0	0	0	0	0	0	2.068
18.7215	0	0	0	0	0	0	0	0	0	0	0	0	0	0	0	0	0	0	0	0	0	0	0	0	0	0	0	0	0	0	0	0	0	0	0	0	0	0	0	0	0	0	0	0	0	0	0	0	2.527
18.7309	0	0	0	0	0	0	0	0	0	0	0	0	0	0	0	0	0	0	0	0	0	0	0	0	0	0	0	0	0	0	0	0	0	0	0	0	0	0	0	0	0	0	0	0	0	0	0	0	2.527
[truncated: 9,719 more rows]
[truncated: 93 more columns]
