# Supplementary material for: Raised water temperature enhances benthopelagic links via intensified bioturbation and benthos-mediated nutrient cycling
Source: PeerJ. 2024 Feb 28;12:e17047. doi: 10.7717/peerj.17047 (PMC11636707; doi:10.7717/peerj.17047)
Supplement: File S2 [file peerj-12-17047-s003.xlsx]

## Sheet: TITLE
Oxygen and Nutrient Calculations
Explanations
Species colour codes
red	Lanice conchilega
orange	Reef Sediment Control
yellow	Cerastoderma edule
green	Hediste diversicolor
blue	Uthörn Sediment Control
white	Arenicola marina
Tank codes
Tanks 1 - 6	15 °C
Tanks 7 - 12	20 °C
Excel Tabs/Work flow
Oxygen_010920_Raw		Raw measurement data of oxygen samples taken within each core						µmol/L
Oxygen_020920_Raw		Raw measurement data of oxygen samples taken within each core						µmol/L
Nutrients_Raw		Raw measurement data of nutrient samples taken within each core						µmol/L
		(1-3 delineate time points over the measurements)
R output new excel sheet, with these rate of changes (Unit Change Fluxes Tab)

## Sheet: Oxygen_010920_Raw
***********	*************	*************	**************	*************	*************	*************	*************	*************	*************	*************	*************	*************	*************
Data	from	Pyro	Oxygen	Logger	V3.204	with	FireStingO2	(Firmware	3.10)	---	Pyro	Science	---	Device	Name:
***********	*************	*************	**************	*************	*************	*************	*************	*************	*************	*************	*************	*************	*************
Settings:	Description	Units	Basic Mode	Sensor Code	Meas. Mode	Temp. Comp.	Temp. (°C)	Press. Comp.	Press. (hPa)	Salinity (‰)	LED Int. (%)	PD Ampl.	Meas. Time (ms)	Bkdg. Comp.	Fiber Length (m)
Ch 1	Oxygen Sensor Spot, FTC (normal range)	umol/l	OFF	SA7-530-200	3	ON External	20	OFF	1013	0	0.1	200x	10	ON fiber length	2
Temp.	Sensor	Measuring	Time (ms):	300	Offset ('C):	0
Calibration:	Status 0% Cal.	Status upper Cal.	Temp. 0% Cal. (°C)	Temp. upper Cal. (°C)	Press. (hPa)	Humidity (%)	Oxygen (%O2)	dphi0 (°)	dphi100 (°)	f	m	F (Hz)	kt (%/K)	tt (%/K)	Bkgd. Int. (mV)	Bkgd. dphi (°)	mt (1/K)
Ch 1	0% Calibration	Air with 100% Humidity or Air Saturated Water	24.153	24.151	1019	100	20.95	53.163	20.881	0.85	0.081	4000	1.184	-0.07	0.811	0	-0.00037
Data	Smoothing:	3
Date:	2020-09-01
				Oxygen				Compensation	Temperature	('C)		Pressure	Humidity	Temp. Probe	Int. Temp.	Analog In	Raw Data:	dphi (°)			Signal	Intensity	(mV)		Ambient	Light	(mV)		Advanced Raw Values (only logged while raw data window is open)
Date	Time (HH:MM:SS)	Time (s)	Comment	Ch1	Ch2	Ch3	Ch4	Ch 1	Ch 2	Ch 3	Ch 4	(mbar)	(%)	('C)	('C)	(mV)	Ch 1	Ch 2	Ch 3	Ch 4	Ch1	Ch2	Ch3	Ch4	Ch1	Ch2	Ch3	Ch4	(MainBkgd->MainBkgd->MainPhi->RefAmpl->RefBkgnd->RefPhi)
2020-09-01	08:13:41	492.91	12blue	321.65	---	---	---	16.884	---	---	---	1022	62.148	16.884	---	---	21.169	---	---	---	121.684	---	---	---	17.427	---	---	---
2020-09-01	08:13:42	493.91	12blue	305.51	---	---	---	18.528	---	---	---	1021.97	62.224	18.528	---	---	21.158	---	---	---	121.678	---	---	---	17.49	---	---	---
2020-09-01	08:13:43	494.91	12blue	289.13	---	---	---	20.186	---	---	---	1021.92	62.321	20.186	---	---	21.149	---	---	---	121.682	---	---	---	17.484	---	---	---
2020-09-01	08:13:44	495.91	12blue	288.81	---	---	---	20.195	---	---	---	1021.94	62.328	20.195	---	---	21.159	---	---	---	121.676	---	---	---	17.432	---	---	---
2020-09-01	08:13:45	496.91	12blue	288.65	---	---	---	20.201	---	---	---	1021.97	62.318	20.201	---	---	21.163	---	---	---	121.682	---	---	---	17.372	---	---	---
2020-09-01	08:13:46	497.91	12blue	288.39	---	---	---	20.207	---	---	---	1021.97	62.298	20.207	---	---	21.17	---	---	---	121.68	---	---	---	17.355	---	---	---
2020-09-01	08:13:47	498.91	12blue	288.34	---	---	---	20.212	---	---	---	1021.95	62.28	20.212	---	---	21.171	---	---	---	121.692	---	---	---	17.276	---	---	---
2020-09-01	08:13:48	499.91	12blue	288.19	---	---	---	20.213	---	---	---	1021.91	62.242	20.213	---	---	21.176	---	---	---	121.682	---	---	---	16.549	---	---	---
2020-09-01	08:13:49	500.91	12blue	288.34	---	---	---	20.214	---	---	---	1021.92	62.224	20.214	---	---	21.17	---	---	---	121.665	---	---	---	14.866	---	---	---
2020-09-01	08:13:50	501.91	12blue	288.37	---	---	---	20.215	---	---	---	1021.91	62.214	20.215	---	---	21.168	---	---	---	121.63	---	---	---	13.231	---	---	---
2020-09-01	08:13:51	502.91	12blue	288.39	---	---	---	20.218	---	---	---	1021.93	62.234	20.218	---	---	21.167	---	---	---	121.621	---	---	---	12.302	---	---	---
2020-09-01	08:13:52	503.91	12blue	288.42	---	---	---	20.217	---	---	---	1021.92	62.234	20.217	---	---	21.166	---	---	---	121.621	---	---	---	12.361	---	---	---
2020-09-01	08:13:53	504.91	12blue	288.43	---	---	---	20.216	---	---	---	1021.9	62.234	20.216	---	---	21.166	---	---	---	121.638	---	---	---	12.372	---	---	---
2020-09-01	08:13:54	505.91	12blue	288.31	---	---	---	20.215	---	---	---	1021.88	62.206	20.215	---	---	21.171	---	---	---	121.631	---	---	---	12.458	---	---	---
2020-09-01	08:13:55	506.91	12blue	288.38	---	---	---	20.212	---	---	---	1021.89	62.179	20.212	---	---	21.169	---	---	---	121.626	---	---	---	14.346	---	---	---
2020-09-01	08:13:56	507.91	12blue	288.54	---	---	---	20.212	---	---	---	1021.91	62.161	20.212	---	---	21.163	---	---	---	121.641	---	---	---	16.167	---	---	---
2020-09-01	08:13:57	508.91	12blue	288.71	---	---	---	20.209	---	---	---	1021.98	62.161	20.209	---	---	21.158	---	---	---	121.651	---	---	---	16.248	---	---	---
2020-09-01	08:13:58	509.91	12blue	288.52	---	---	---	20.21	---	---	---	1021.95	62.151	20.21	---	---	21.164	---	---	---	121.658	---	---	---	14.351	---	---	---
2020-09-01	08:13:59	510.91	12blue	288.34	---	---	---	20.21	---	---	---	1021.95	62.13	20.21	---	---	21.171	---	---	---	121.633	---	---	---	12.9	---	---	---
2020-09-01	08:14:00	511.91	12blue	288.28	---	---	---	20.213	---	---	---	1021.9	62.092	20.213	---	---	21.173	---	---	---	121.643	---	---	---	13.713	---	---	---
2020-09-01	11:35:23	12594.9	12blue	261.47	---	---	---	20.518	---	---	---	1021.46	50.434	20.518	---	---	22.217	---	---	---	123.504	---	---	---	62.719	---	---	---
2020-09-01	11:35:24	12595.9	12blue	280.28	---	---	---	20.515	---	---	---	1021.45	50.427	20.515	---	---	21.407	---	---	---	118.588	---	---	---	54.225	---	---	---
2020-09-01	11:35:25	12596.9	12blue	291.8	---	---	---	20.516	---	---	---	1021.43	50.427	20.516	---	---	20.937	---	---	---	115.846	---	---	---	50.217	---	---	---
2020-09-01	11:35:26	12597.9	12blue	291.5	---	---	---	20.524	---	---	---	1021.43	50.434	20.524	---	---	20.945	---	---	---	115.741	---	---	---	49.716	---	---	---
2020-09-01	11:35:27	12598.9	12blue	291.65	---	---	---	20.53	---	---	---	1021.47	50.442	20.53	---	---	20.937	---	---	---	115.661	---	---	---	50.122	---	---	---
2020-09-01	11:35:28	12599.9	12blue	291.87	---	---	---	20.532	---	---	---	1021.49	50.442	20.532	---	---	20.928	---	---	---	115.571	---	---	---	43.832	---	---	---
2020-09-01	11:35:29	12600.9	12blue	292.24	---	---	---	20.531	---	---	---	1021.51	50.442	20.531	---	---	20.915	---	---	---	115.481	---	---	---	44.274	---	---	---
2020-09-01	11:35:30	12601.9	12blue	292.38	---	---	---	20.529	---	---	---	1021.48	50.442	20.529	---	---	20.91	---	---	---	115.384	---	---	---	44.791	---	---	---
2020-09-01	11:35:31	12602.9	12blue	292.44	---	---	---	20.529	---	---	---	1021.5	50.434	20.529	---	---	20.908	---	---	---	115.34	---	---	---	43.395	---	---	---
2020-09-01	11:35:32	12603.9	12blue	292.54	---	---	---	20.529	---	---	---	1021.48	50.427	20.529	---	---	20.904	---	---	---	115.262	---	---	---	43.245	---	---	---
2020-09-01	11:35:33	12604.9	12blue	292.44	---	---	---	20.529	---	---	---	1021.47	50.409	20.529	---	---	20.908	---	---	---	115.188	---	---	---	42.714	---	---	---
2020-09-01	11:35:34	12605.9	12blue	292.49	---	---	---	20.528	---	---	---	1021.42	50.398	20.528	---	---	20.906	---	---	---	115.113	---	---	---	42.636	---	---	---
2020-09-01	11:35:35	12606.9	12blue	292.43	---	---	---	20.527	---	---	---	1021.42	50.388	20.527	---	---	20.909	---	---	---	115.092	---	---	---	38.656	---	---	---
2020-09-01	11:35:36	12607.9	12blue	292.66	---	---	---	20.528	---	---	---	1021.42	50.388	20.528	---	---	20.9	---	---	---	115.072	---	---	---	35.81	---	---	---
2020-09-01	11:35:37	12608.9	12blue	292.8	---	---	---	20.527	---	---	---	1021.45	50.393	20.527	---	---	20.895	---	---	---	115.03	---	---	---	35.558	---	---	---
2020-09-01	11:35:38	12609.9	12blue	292.95	---	---	---	20.528	---	---	---	1021.48	50.393	20.528	---	---	20.889	---	---	---	114.985	---	---	---	37.279	---	---	---
2020-09-01	11:35:39	12610.9	12blue	292.98	---	---	---	20.53	---	---	---	1021.46	50.409	20.53	---	---	20.887	---	---	---	114.934	---	---	---	37.791	---	---	---
2020-09-01	14:10:43	21914.8	12blue	217.36	---	---	---	20.259	---	---	---	1021.21	37.319	20.259	---	---	24.693	---	---	---	127.197	---	---	---	9.81	---	---	---
2020-09-01	14:10:44	21915.8	12blue	250.73	---	---	---	20.259	---	---	---	1021.26	37.719	20.259	---	---	23.008	---	---	---	117.153	---	---	---	9.763	---	---	---
2020-09-01	14:10:45	21916.8	12blue	284.35	---	---	---	20.259	---	---	---	1021.3	38.082	20.259	---	---	21.309	---	---	---	107.046	---	---	---	9.751	---	---	---
2020-09-01	14:10:46	21917.8	12blue	284.29	---	---	---	20.263	---	---	---	1021.28	38.075	20.263	---	---	21.31	---	---	---	106.998	---	---	---	9.744	---	---	---
2020-09-01	14:10:47	21918.8	12blue	284.41	---	---	---	20.26	---	---	---	1021.27	38.075	20.26	---	---	21.307	---	---	---	107.027	---	---	---	9.802	---	---	---
2020-09-01	14:10:48	21919.8	12blue	284.47	---	---	---	20.259	---	---	---	1021.23	38.052	20.259	---	---	21.305	---	---	---	107.028	---	---	---	9.946	---	---	---
2020-09-01	14:10:49	21920.8	12blue	284.35	---	---	---	20.26	---	---	---	1021.23	38.006	20.26	---	---	21.309	---	---	---	107.075	---	---	---	9.957	---	---	---
2020-09-01	14:10:50	21921.8	12blue	284.23	---	---	---	20.262	---	---	---	1021.24	37.904	20.262	---	---	21.313	---	---	---	107.051	---	---	---	9.911	---	---	---
2020-09-01	14:10:51	21922.8	12blue	284.06	---	---	---	20.267	---	---	---	1021.24	37.805	20.267	---	---	21.318	---	---	---	107.084	---	---	---	9.759	---	---	---
2020-09-01	14:10:52	21923.8	12blue	284.16	---	---	---	20.268	---	---	---	1021.22	37.716	20.268	---	---	21.314	---	---	---	107.07	---	---	---	9.695	---	---	---
2020-09-01	14:10:53	21924.8	12blue	284.07	---	---	---	20.267	---	---	---	1021.21	37.673	20.267	---	---	21.318	---	---	---	107.07	---	---	---	9.678	---	---	---
2020-09-01	14:10:54	21925.8	12blue	284.03	---	---	---	20.263	---	---	---	1021.26	37.617	20.263	---	---	21.32	---	---	---	107.061	---	---	---	9.646	---	---	---
2020-09-01	14:10:55	21926.8	12blue	284.02	---	---	---	20.263	---	---	---	1021.25	37.551	20.263	---	---	21.321	---	---	---	107.064	---	---	---	9.671	---	---	---
2020-09-01	14:10:56	21927.8	12blue	284.19	---	---	---	20.263	---	---	---	1021.26	37.484	20.263	---	---	21.314	---	---	---	107.09	---	---	---	9.67	---	---	---
2020-09-01	14:10:57	21928.8	12blue	284.31	---	---	---	20.264	---	---	---	1021.24	37.451	20.264	---	---	21.309	---	---	---	107.073	---	---	---	9.693	---	---	---
2020-09-01	08:24:03	1114.78	12green	284.32	---	---	---	20.2	---	---	---	1022.01	64.31	20.2	---	---	21.332	---	---	---	122.81	---	---	---	12.165	---	---	---
2020-09-01	08:24:04	1115.78	12green	281.59	---	---	---	20.207	---	---	---	1021.96	64.556	20.207	---	---	21.437	---	---	---	123.666	---	---	---	11.095	---	---	---
2020-09-01	08:24:05	1116.78	12green	278.94	---	---	---	20.213	---	---	---	1021.96	64.801	20.213	---	---	21.54	---	---	---	124.517	---	---	---	9.99	---	---	---
2020-09-01	08:24:06	1117.78	12green	279.16	---	---	---	20.215	---	---	---	1021.93	64.818	20.215	---	---	21.53	---	---	---	124.516	---	---	---	9.965	---	---	---
2020-09-01	08:24:07	1118.78	12green	279.27	---	---	---	20.216	---	---	---	1022	64.854	20.216	---	---	21.525	---	---	---	124.486	---	---	---	9.944	---	---	---
2020-09-01	08:24:08	1119.78	12green	279.53	---	---	---	20.217	---	---	---	1022.02	64.907	20.217	---	---	21.514	---	---	---	124.464	---	---	---	9.631	---	---	---
2020-09-01	08:24:09	1120.78	12green	279.49	---	---	---	20.216	---	---	---	1021.99	64.978	20.216	---	---	21.516	---	---	---	124.449	---	---	---	9.641	---	---	---
2020-09-01	08:24:10	1121.78	12green	279.54	---	---	---	20.211	---	---	---	1021.95	65.04	20.211	---	---	21.516	---	---	---	124.462	---	---	---	9.646	---	---	---
2020-09-01	08:24:11	1122.78	12green	279.34	---	---	---	20.207	---	---	---	1021.93	65.075	20.207	---	---	21.526	---	---	---	124.446	---	---	---	9.907	---	---	---
2020-09-01	08:24:12	1123.78	12green	279.5	---	---	---	20.205	---	---	---	1021.97	65.083	20.205	---	---	21.52	---	---	---	124.45	---	---	---	12.532	---	---	---
2020-09-01	08:24:13	1124.78	12green	279.58	---	---	---	20.2	---	---	---	1021.99	65.083	20.2	---	---	21.518	---	---	---	124.438	---	---	---	12.689	---	---	---
2020-09-01	08:24:14	1125.78	12green	279.91	---	---	---	20.192	---	---	---	1021.99	65.083	20.192	---	---	21.508	---	---	---	124.438	---	---	---	12.973	---	---	---
2020-09-01	08:24:15	1126.78	12green	279.89	---	---	---	20.186	---	---	---	1021.96	65.083	20.186	---	---	21.511	---	---	---	124.431	---	---	---	10.945	---	---	---
2020-09-01	08:24:16	1127.78	12green	279.72	---	---	---	20.188	---	---	---	1021.95	65.083	20.188	---	---	21.517	---	---	---	124.422	---	---	---	10.963	---	---	---
2020-09-01	08:24:17	1128.78	12green	279.44	---	---	---	20.193	---	---	---	1022	65.093	20.193	---	---	21.526	---	---	---	124.411	---	---	---	10.716	---	---	---
2020-09-01	08:24:18	1129.78	12green	279.26	---	---	---	20.2	---	---	---	1022.01	65.103	20.2	---	---	21.531	---	---	---	124.408	---	---	---	10.942	---	---	---
2020-09-01	08:24:19	1130.78	12green	279.32	---	---	---	20.207	---	---	---	1022	65.138	20.207	---	---	21.527	---	---	---	124.4	---	---	---	10.762	---	---	---
2020-09-01	08:24:20	1131.78	12green	279.44	---	---	---	20.208	---	---	---	1021.97	65.199	20.208	---	---	21.521	---	---	---	124.415	---	---	---	10.846	---	---	---
2020-09-01	08:24:21	1132.78	12green	279.58	---	---	---	20.209	---	---	---	1021.97	65.288	20.209	---	---	21.515	---	---	---	124.397	---	---	---	10.012	---	---	---
2020-09-01	11:26:19	12051	12green	297.85	---	---	---	17.103	---	---	---	1021.72	49.725	17.103	---	---	22.052	---	---	---	118.231	---	---	---	24.385	---	---	---
2020-09-01	11:26:20	12052	12green	267.71	---	---	---	18.747	---	---	---	1021.67	50.465	18.747	---	---	22.677	---	---	---	124.102	---	---	---	17.125	---	---	---
2020-09-01	11:26:21	12053	12green	237.76	---	---	---	20.388	---	---	---	1021.62	51.213	20.388	---	---	23.295	---	---	---	129.955	---	---	---	9.84	---	---	---
2020-09-01	11:26:22	12054	12green	237.52	---	---	---	20.394	---	---	---	1021.59	51.23	20.394	---	---	23.305	---	---	---	129.941	---	---	---	9.692	---	---	---
2020-09-01	11:26:23	12055	12green	237.67	---	---	---	20.396	---	---	---	1021.61	51.276	20.396	---	---	23.297	---	---	---	129.952	---	---	---	9.535	---	---	---
2020-09-01	11:26:24	12056	12green	237.61	---	---	---	20.398	---	---	---	1021.61	51.334	20.398	---	---	23.299	---	---	---	129.962	---	---	---	9.408	---	---	---
2020-09-01	11:26:25	12057	12green	237.63	---	---	---	20.4	---	---	---	1021.63	51.393	20.4	---	---	23.298	---	---	---	129.968	---	---	---	9.427	---	---	---
2020-09-01	11:26:26	12058	12green	237.54	---	---	---	20.402	---	---	---	1021.61	51.434	20.402	---	---	23.301	---	---	---	129.965	---	---	---	9.436	---	---	---
2020-09-01	11:26:27	12059	12green	237.51	---	---	---	20.404	---	---	---	1021.62	51.454	20.404	---	---	23.302	---	---	---	129.972	---	---	---	9.413	---	---	---
2020-09-01	11:26:28	12060	12green	237.55	---	---	---	20.403	---	---	---	1021.59	51.472	20.403	---	---	23.3	---	---	---	129.969	---	---	---	9.502	---	---	---
2020-09-01	11:26:29	12061	12green	237.58	---	---	---	20.402	---	---	---	1021.6	51.49	20.402	---	---	23.299	---	---	---	129.986	---	---	---	9.68	---	---	---
2020-09-01	11:26:30	12062	12green	237.65	---	---	---	20.401	---	---	---	1021.62	51.518	20.401	---	---	23.296	---	---	---	129.982	---	---	---	9.815	---	---	---
2020-09-01	11:26:31	12063	12green	237.61	---	---	---	20.401	---	---	---	1021.62	51.528	20.401	---	---	23.298	---	---	---	129.961	---	---	---	9.814	---	---	---
2020-09-01	11:26:32	12064	12green	237.62	---	---	---	20.401	---	---	---	1021.61	51.51	20.401	---	---	23.298	---	---	---	129.944	---	---	---	9.766	---	---	---
2020-09-01	11:26:33	12065	12green	237.5	---	---	---	20.401	---	---	---	1021.6	51.462	20.401	---	---	23.304	---	---	---	129.939	---	---	---	9.752	---	---	---
2020-09-01	14:04:41	21553.2	12green	288.43	---	---	---	16.993	---	---	---	1021.19	30.849	16.993	---	---	22.763	---	---	---	111.223	---	---	---	38.59	---	---	---
2020-09-01	14:04:42	21554.2	12green	238.95	---	---	---	18.686	---	---	---	1021.2	33.286	18.686	---	---	24.37	---	---	---	123.876	---	---	---	46.398	---	---	---
2020-09-01	14:04:43	21555.2	12green	189.38	---	---	---	20.381	---	---	---	1021.19	35.722	20.381	---	---	25.98	---	---	---	136.525	---	---	---	54.604	---	---	---
2020-09-01	14:04:44	21556.2	12green	189.27	---	---	---	20.386	---	---	---	1021.15	35.709	20.386	---	---	25.986	---	---	---	136.529	---	---	---	55.404	---	---	---
2020-09-01	14:04:45	21557.2	12green	189.15	---	---	---	20.391	---	---	---	1021.17	35.742	20.391	---	---	25.992	---	---	---	136.513	---	---	---	54.396	---	---	---
2020-09-01	14:04:46	21558.2	12green	188.98	---	---	---	20.392	---	---	---	1021.19	35.821	20.392	---	---	26.001	---	---	---	136.488	---	---	---	51.854	---	---	---
2020-09-01	14:04:47	21559.2	12green	189.07	---	---	---	20.394	---	---	---	1021.21	35.91	20.394	---	---	25.995	---	---	---	136.479	---	---	---	51.277	---	---	---
2020-09-01	14:04:48	21560.2	12green	189.09	---	---	---	20.393	---	---	---	1021.23	35.979	20.393	---	---	25.994	---	---	---	136.46	---	---	---	50.446	---	---	---
2020-09-01	14:04:49	21561.2	12green	189.14	---	---	---	20.393	---	---	---	1021.27	35.989	20.393	---	---	25.991	---	---	---	136.438	---	---	---	51.308	---	---	---
2020-09-01	14:04:50	21562.2	12green	189.36	---	---	---	20.393	---	---	---	1021.29	35.979	20.393	---	---	25.977	---	---	---	136.401	---	---	---	51.769	---	---	---
2020-09-01	14:04:51	21563.2	12green	189.44	---	---	---	20.391	---	---	---	1021.32	35.946	20.391	---	---	25.973	---	---	---	136.393	---	---	---	52.713	---	---	---
2020-09-01	14:04:52	21564.2	12green	189.53	---	---	---	20.39	---	---	---	1021.31	35.925	20.39	---	---	25.967	---	---	---	136.383	---	---	---	51.799	---	---	---
2020-09-01	14:04:53	21565.2	12green	189.45	---	---	---	20.388	---	---	---	1021.29	35.925	20.388	---	---	25.974	---	---	---	136.365	---	---	---	51.391	---	---	---
2020-09-01	14:04:54	21566.2	12green	189.49	---	---	---	20.388	---	---	---	1021.26	35.936	20.388	---	---	25.971	---	---	---	136.338	---	---	---	49.801	---	---	---
2020-09-01	14:04:55	21567.2	12green	189.57	---	---	---	20.388	---	---	---	1021.23	35.923	20.388	---	---	25.966	---	---	---	136.272	---	---	---	46.534	---	---	---
2020-09-01	14:04:56	21568.2	12green	189.67	---	---	---	20.388	---	---	---	1021.23	35.9	20.388	---	---	25.959	---	---	---	136.207	---	---	---	40.941	---	---	---
2020-09-01	08:19:02	813.52	12orange	287.72	---	---	---	20.203	---	---	---	1021.96	62.552	20.203	---	---	21.198	---	---	---	121.77	---	---	---	14.451	---	---	---
2020-09-01	08:19:03	814.52	12orange	287.21	---	---	---	20.193	---	---	---	1021.95	63.04	20.193	---	---	21.221	---	---	---	121.9	---	---	---	14.73	---	---	---
2020-09-01	08:19:04	815.52	12orange	286.8	---	---	---	20.185	---	---	---	1021.99	63.577	20.185	---	---	21.239	---	---	---	122.016	---	---	---	14.362	---	---	---
2020-09-01	08:19:05	816.52	12orange	286.97	---	---	---	20.187	---	---	---	1021.95	63.625	20.187	---	---	21.232	---	---	---	121.999	---	---	---	14.313	---	---	---
2020-09-01	08:19:06	817.52	12orange	287.11	---	---	---	20.188	---	---	---	1022.01	63.646	20.188	---	---	21.226	---	---	---	121.994	---	---	---	14.277	---	---	---
2020-09-01	08:19:07	818.52	12orange	287.08	---	---	---	20.187	---	---	---	1021.97	63.635	20.187	---	---	21.228	---	---	---	121.987	---	---	---	14.268	---	---	---
2020-09-01	08:19:08	819.52	12orange	287.03	---	---	---	20.188	---	---	---	1021.99	63.635	20.188	---	---	21.229	---	---	---	121.993	---	---	---	14.16	---	---	---
2020-09-01	08:19:09	820.52	12orange	286.96	---	---	---	20.187	---	---	---	1021.94	63.635	20.187	---	---	21.232	---	---	---	121.985	---	---	---	14.133	---	---	---
2020-09-01	08:19:10	821.52	12orange	287.07	---	---	---	20.19	---	---	---	1021.96	63.653	20.19	---	---	21.227	---	---	---	121.978	---	---	---	14.277	---	---	---
2020-09-01	08:19:11	822.52	12orange	287.16	---	---	---	20.192	---	---	---	1021.96	63.699	20.192	---	---	21.223	---	---	---	121.959	---	---	---	14.352	---	---	---
2020-09-01	08:19:12	823.52	12orange	287.27	---	---	---	20.194	---	---	---	1021.99	63.765	20.194	---	---	21.218	---	---	---	121.966	---	---	---	14.147	---	---	---
2020-09-01	08:19:13	824.52	12orange	287.33	---	---	---	20.193	---	---	---	1021.98	63.824	20.193	---	---	21.216	---	---	---	121.97	---	---	---	13.741	---	---	---
2020-09-01	08:19:14	825.52	12orange	287.36	---	---	---	20.192	---	---	---	1021.97	63.854	20.192	---	---	21.215	---	---	---	121.987	---	---	---	13.398	---	---	---
2020-09-01	08:19:15	826.52	12orange	287.19	---	---	---	20.193	---	---	---	1021.94	63.875	20.193	---	---	21.221	---	---	---	121.971	---	---	---	13.293	---	---	---
2020-09-01	08:19:16	827.52	12orange	287.07	---	---	---	20.194	---	---	---	1021.95	63.875	20.194	---	---	21.226	---	---	---	121.97	---	---	---	13.304	---	---	---
2020-09-01	08:19:17	828.52	12orange	286.95	---	---	---	20.194	---	---	---	1021.94	63.844	20.194	---	---	21.231	---	---	---	121.962	---	---	---	13.288	---	---	---
2020-09-01	08:19:18	829.52	12orange	286.93	---	---	---	20.192	---	---	---	1021.94	63.796	20.192	---	---	21.232	---	---	---	121.956	---	---	---	13.319	---	---	---
2020-09-01	08:19:19	830.52	12orange	286.77	---	---	---	20.193	---	---	---	1021.95	63.768	20.193	---	---	21.238	---	---	---	121.946	---	---	---	13.158	---	---	---
2020-09-01	08:19:20	831.52	12orange	287	---	---	---	20.191	---	---	---	1021.96	63.798	20.191	---	---	21.23	---	---	---	121.95	---	---	---	13.13	---	---	---
2020-09-01	08:19:21	832.52	12orange	287.2	---	---	---	20.193	---	---	---	1021.95	63.875	20.193	---	---	21.221	---	---	---	121.958	---	---	---	13.1	---	---	---
2020-09-01	08:19:22	833.52	12orange	287.42	---	---	---	20.193	---	---	---	1021.95	63.969	20.193	---	---	21.213	---	---	---	121.965	---	---	---	13.188	---	---	---
2020-09-01	08:19:23	834.52	12orange	287.18	---	---	---	20.197	---	---	---	1021.95	64.035	20.197	---	---	21.221	---	---	---	121.965	---	---	---	13.211	---	---	---
2020-09-01	11:36:20	12652.1	12orange	287.51	---	---	---	20.521	---	---	---	1021.47	50.381	20.521	---	---	21.103	---	---	---	116.047	---	---	---	47.248	---	---	---
2020-09-01	11:36:21	12653.1	12orange	282.1	---	---	---	20.511	---	---	---	1021.43	50.348	20.511	---	---	21.317	---	---	---	117.19	---	---	---	54.298	---	---	---
2020-09-01	11:36:22	12654.1	12orange	276.66	---	---	---	20.502	---	---	---	1021.44	50.299	20.502	---	---	21.532	---	---	---	118.342	---	---	---	62.128	---	---	---
2020-09-01	11:36:23	12655.1	12orange	276.59	---	---	---	20.508	---	---	---	1021.41	50.289	20.508	---	---	21.533	---	---	---	118.404	---	---	---	60.178	---	---	---
2020-09-01	11:36:24	12656.1	12orange	276.6	---	---	---	20.51	---	---	---	1021.43	50.309	20.51	---	---	21.532	---	---	---	118.401	---	---	---	59.667	---	---	---
2020-09-01	11:36:25	12657.1	12orange	276.56	---	---	---	20.51	---	---	---	1021.45	50.348	20.51	---	---	21.533	---	---	---	118.429	---	---	---	57.383	---	---	---
2020-09-01	11:36:26	12658.1	12orange	276.62	---	---	---	20.509	---	---	---	1021.5	50.396	20.509	---	---	21.531	---	---	---	118.418	---	---	---	55.208	---	---	---
2020-09-01	11:36:27	12659.1	12orange	276.46	---	---	---	20.512	---	---	---	1021.49	50.434	20.512	---	---	21.537	---	---	---	118.405	---	---	---	56.403	---	---	---
2020-09-01	11:36:28	12660.1	12orange	276.4	---	---	---	20.514	---	---	---	1021.53	50.462	20.514	---	---	21.538	---	---	---	118.374	---	---	---	58.56	---	---	---
2020-09-01	11:36:29	12661.1	12orange	276.32	---	---	---	20.513	---	---	---	1021.47	50.48	20.513	---	---	21.542	---	---	---	118.34	---	---	---	60.687	---	---	---
2020-09-01	11:36:30	12662.1	12orange	276.4	---	---	---	20.511	---	---	---	1021.47	50.478	20.511	---	---	21.539	---	---	---	118.362	---	---	---	60.949	---	---	---
2020-09-01	14:11:31	21963.2	12orange	277.93	---	---	---	20.26	---	---	---	1021.29	37.522	20.26	---	---	21.571	---	---	---	108.637	---	---	---	9.837	---	---	---
2020-09-01	14:11:32	21964.2	12orange	271.54	---	---	---	20.257	---	---	---	1021.28	37.561	20.257	---	---	21.833	---	---	---	110.198	---	---	---	9.892	---	---	---
2020-09-01	14:11:33	21965.2	12orange	265.22	---	---	---	20.253	---	---	---	1021.23	37.576	20.253	---	---	22.092	---	---	---	111.775	---	---	---	9.921	---	---	---
2020-09-01	14:11:34	21966.2	12orange	265.23	---	---	---	20.256	---	---	---	1021.24	37.51	20.256	---	---	22.091	---	---	---	111.764	---	---	---	9.803	---	---	---
2020-09-01	14:11:35	21967.2	12orange	265.19	---	---	---	20.257	---	---	---	1021.24	37.487	20.257	---	---	22.092	---	---	---	111.754	---	---	---	9.8	---	---	---
2020-09-01	14:11:36	21968.2	12orange	265.07	---	---	---	20.258	---	---	---	1021.28	37.477	20.258	---	---	22.097	---	---	---	111.755	---	---	---	9.797	---	---	---
2020-09-01	14:11:37	21969.2	12orange	264.81	---	---	---	20.259	---	---	---	1021.27	37.467	20.259	---	---	22.107	---	---	---	111.758	---	---	---	9.829	---	---	---
2020-09-01	14:11:38	21970.2	12orange	264.77	---	---	---	20.261	---	---	---	1021.28	37.457	20.261	---	---	22.108	---	---	---	111.769	---	---	---	9.853	---	---	---
2020-09-01	14:11:39	21971.2	12orange	264.94	---	---	---	20.263	---	---	---	1021.26	37.434	20.263	---	---	22.1	---	---	---	111.765	---	---	---	9.874	---	---	---
2020-09-01	14:11:40	21972.2	12orange	265.18	---	---	---	20.263	---	---	---	1021.27	37.398	20.263	---	---	22.09	---	---	---	111.771	---	---	---	9.892	---	---	---
2020-09-01	14:11:41	21973.2	12orange	265.28	---	---	---	20.263	---	---	---	1021.26	37.363	20.263	---	---	22.086	---	---	---	111.778	---	---	---	9.886	---	---	---
2020-09-01	14:11:42	21974.2	12orange	265.27	---	---	---	20.263	---	---	---	1021.29	37.35	20.263	---	---	22.087	---	---	---	111.783	---	---	---	9.871	---	---	---
2020-09-01	14:11:43	21975.2	12orange	265.51	---	---	---	20.263	---	---	---	1021.24	37.35	20.263	---	---	22.076	---	---	---	111.745	---	---	---	9.853	---	---	---
2020-09-01	14:11:44	21976.2	12orange	265.7	---	---	---	20.263	---	---	---	1021.24	37.355	20.263	---	---	22.068	---	---	---	111.696	---	---	---	9.86	---	---	---
2020-09-01	14:11:45	21977.2	12orange	265.94	---	---	---	20.265	---	---	---	1021.26	37.37	20.265	---	---	22.057	---	---	---	111.635	---	---	---	9.919	---	---	---
2020-09-01	08:34:07	1719	12red	270.24	---	---	---	20.203	---	---	---	1022.07	67.092	20.203	---	---	21.898	---	---	---	225.282	---	---	---	14.664	---	---	---
2020-09-01	08:34:08	1720	12red	269.84	---	---	---	20.2	---	---	---	1022.07	67.547	20.2	---	---	21.916	---	---	---	322.722	---	---	---	11.283	---	---	---
2020-09-01	08:34:09	1721	12red	269.42	---	---	---	20.198	---	---	---	1022.11	67.984	20.198	---	---	21.934	---	---	---	420.149	---	---	---	7.461	---	---	---
2020-09-01	08:34:10	1722	12red	269.52	---	---	---	20.203	---	---	---	1022.07	67.977	20.203	---	---	21.928	---	---	---	420.114	---	---	---	7.429	---	---	---
2020-09-01	08:34:11	1723	12red	269.45	---	---	---	20.208	---	---	---	1022.09	67.941	20.208	---	---	21.929	---	---	---	420.094	---	---	---	7.422	---	---	---
2020-09-01	08:34:12	1724	12red	269.46	---	---	---	20.212	---	---	---	1022.06	67.888	20.212	---	---	21.927	---	---	---	420.072	---	---	---	7.415	---	---	---
2020-09-01	08:34:13	1725	12red	269.38	---	---	---	20.213	---	---	---	1022.05	67.824	20.213	---	---	21.93	---	---	---	420.063	---	---	---	7.412	---	---	---
2020-09-01	08:34:14	1726	12red	269.46	---	---	---	20.208	---	---	---	1022.02	67.796	20.208	---	---	21.929	---	---	---	420.058	---	---	---	7.451	---	---	---
2020-09-01	08:34:15	1727	12red	269.51	---	---	---	20.2	---	---	---	1022.01	67.814	20.2	---	---	21.929	---	---	---	420.065	---	---	---	7.46	---	---	---
2020-09-01	08:34:16	1728	12red	269.6	---	---	---	20.194	---	---	---	1022.01	67.86	20.194	---	---	21.928	---	---	---	420.057	---	---	---	7.48	---	---	---
2020-09-01	08:34:17	1729	12red	269.66	---	---	---	20.193	---	---	---	1022.03	67.905	20.193	---	---	21.926	---	---	---	420.054	---	---	---	7.447	---	---	---
2020-09-01	08:34:18	1730	12red	269.65	---	---	---	20.195	---	---	---	1022.05	67.959	20.195	---	---	21.925	---	---	---	420.045	---	---	---	7.422	---	---	---
2020-09-01	08:34:19	1731	12red	269.58	---	---	---	20.199	---	---	---	1022.06	68.02	20.199	---	---	21.927	---	---	---	420.056	---	---	---	7.393	---	---	---
2020-09-01	08:34:20	1732	12red	269.54	---	---	---	20.199	---	---	---	1022.04	68.063	20.199	---	---	21.929	---	---	---	420.054	---	---	---	7.381	---	---	---
2020-09-01	08:34:21	1733	12red	269.55	---	---	---	20.2	---	---	---	1022.05	68.073	20.2	---	---	21.928	---	---	---	420.029	---	---	---	7.381	---	---	---
2020-09-01	08:34:22	1734	12red	269.56	---	---	---	20.201	---	---	---	1022.08	68.056	20.201	---	---	21.927	---	---	---	420.012	---	---	---	7.407	---	---	---
2020-09-01	08:34:23	1735	12red	269.55	---	---	---	20.205	---	---	---	1022.1	68.038	20.205	---	---	21.926	---	---	---	419.992	---	---	---	7.5	---	---	---
2020-09-01	08:34:24	1736	12red	269.54	---	---	---	20.206	---	---	---	1022.08	68.02	20.206	---	---	21.926	---	---	---	420.006	---	---	---	7.566	---	---	---
2020-09-01	08:34:25	1737	12red	269.57	---	---	---	20.206	---	---	---	1022.07	68.03	20.206	---	---	21.925	---	---	---	419.979	---	---	---	7.608	---	---	---
2020-09-01	08:34:26	1738	12red	269.6	---	---	---	20.203	---	---	---	1022.07	68.048	20.203	---	---	21.924	---	---	---	419.978	---	---	---	7.593	---	---	---
2020-09-01	08:34:27	1739	12red	269.65	---	---	---	20.204	---	---	---	1022.06	68.091	20.204	---	---	21.922	---	---	---	419.973	---	---	---	7.59	---	---	---
2020-09-01	08:34:28	1740	12red	269.65	---	---	---	20.206	---	---	---	1022.06	68.116	20.206	---	---	21.922	---	---	---	419.981	---	---	---	7.609	---	---	---
2020-09-01	08:34:29	1741	12red	269.66	---	---	---	20.207	---	---	---	1022.03	68.126	20.207	---	---	21.921	---	---	---	419.97	---	---	---	7.619	---	---	---
2020-09-01	11:28:50	12202	12red	193.05	---	---	---	20.395	---	---	---	1021.65	50.818	20.395	---	---	25.746	---	---	---	146.254	---	---	---	9.695	---	---	---
2020-09-01	11:28:51	12203	12red	191.01	---	---	---	20.397	---	---	---	1021.64	50.742	20.397	---	---	25.873	---	---	---	147.15	---	---	---	9.824	---	---	---
2020-09-01	11:28:52	12204	12red	188.83	---	---	---	20.398	---	---	---	1021.62	50.663	20.398	---	---	26.009	---	---	---	148.013	---	---	---	9.87	---	---	---
2020-09-01	11:28:53	12205	12red	188.66	---	---	---	20.4	---	---	---	1021.61	50.67	20.4	---	---	26.019	---	---	---	148.072	---	---	---	9.809	---	---	---
2020-09-01	11:28:54	12206	12red	188.36	---	---	---	20.402	---	---	---	1021.6	50.678	20.402	---	---	26.037	---	---	---	148.103	---	---	---	9.797	---	---	---
2020-09-01	11:28:55	12207	12red	188.35	---	---	---	20.401	---	---	---	1021.6	50.678	20.401	---	---	26.038	---	---	---	148.154	---	---	---	9.81	---	---	---
2020-09-01	11:28:56	12208	12red	188.22	---	---	---	20.403	---	---	---	1021.61	50.678	20.403	---	---	26.045	---	---	---	148.197	---	---	---	9.905	---	---	---
2020-09-01	11:28:57	12209	12red	188.26	---	---	---	20.402	---	---	---	1021.62	50.688	20.402	---	---	26.044	---	---	---	148.239	---	---	---	9.934	---	---	---
2020-09-01	11:28:58	12210	12red	188.29	---	---	---	20.404	---	---	---	1021.63	50.709	20.404	---	---	26.041	---	---	---	148.247	---	---	---	9.91	---	---	---
2020-09-01	11:28:59	12211	12red	188.26	---	---	---	20.402	---	---	---	1021.61	50.729	20.402	---	---	26.043	---	---	---	148.236	---	---	---	9.825	---	---	---
2020-09-01	11:29:00	12212	12red	188.19	---	---	---	20.401	---	---	---	1021.58	50.739	20.401	---	---	26.048	---	---	---	148.229	---	---	---	9.78	---	---	---
2020-09-01	11:29:01	12213	12red	188.12	---	---	---	20.402	---	---	---	1021.59	50.749	20.402	---	---	26.052	---	---	---	148.215	---	---	---	9.771	---	---	---
2020-09-01	11:29:02	12214	12red	188.12	---	---	---	20.405	---	---	---	1021.61	50.77	20.405	---	---	26.051	---	---	---	148.225	---	---	---	9.77	---	---	---
2020-09-01	11:29:03	12215	12red	188.24	---	---	---	20.406	---	---	---	1021.64	50.798	20.406	---	---	26.044	---	---	---	148.253	---	---	---	9.666	---	---	---
2020-09-01	11:29:04	12216	12red	188.22	---	---	---	20.404	---	---	---	1021.63	50.836	20.404	---	---	26.045	---	---	---	148.268	---	---	---	9.499	---	---	---
2020-09-01	11:29:05	12217	12red	188.18	---	---	---	20.401	---	---	---	1021.66	50.874	20.401	---	---	26.049	---	---	---	148.269	---	---	---	9.333	---	---	---
2020-09-01	11:29:06	12218	12red	188.02	---	---	---	20.402	---	---	---	1021.64	50.915	20.402	---	---	26.059	---	---	---	148.255	---	---	---	9.266	---	---	---
2020-09-01	11:29:07	12219	12red	187.98	---	---	---	20.402	---	---	---	1021.6	50.963	20.402	---	---	26.062	---	---	---	148.229	---	---	---	9.48	---	---	---
2020-09-01	11:29:08	12220	12red	188.1	---	---	---	20.403	---	---	---	1021.59	50.993	20.403	---	---	26.053	---	---	---	148.217	---	---	---	9.643	---	---	---
2020-09-01	11:29:09	12221	12red	188.2	---	---	---	20.402	---	---	---	1021.6	51.032	20.402	---	---	26.047	---	---	---	148.217	---	---	---	9.747	---	---	---
2020-09-01	14:06:51	21682.7	12red	108.78	---	---	---	20.386	---	---	---	1021.19	36.884	20.386	---	---	32.682	---	---	---	175.376	---	---	---	66.448	---	---	---
2020-09-01	14:06:52	21683.7	12red	107.61	---	---	---	20.382	---	---	---	1021.2	37.113	20.382	---	---	32.812	---	---	---	176.069	---	---	---	72.911	---	---	---
2020-09-01	14:06:53	21684.7	12red	106.33	---	---	---	20.38	---	---	---	1021.23	37.319	20.38	---	---	32.953	---	---	---	176.776	---	---	---	78.526	---	---	---
2020-09-01	14:06:54	21685.7	12red	106.43	---	---	---	20.383	---	---	---	1021.24	37.319	20.383	---	---	32.94	---	---	---	176.686	---	---	---	75.705	---	---	---
2020-09-01	14:06:55	21686.7	12red	106.32	---	---	---	20.386	---	---	---	1021.23	37.319	20.386	---	---	32.952	---	---	---	176.739	---	---	---	69.318	---	---	---
2020-09-01	14:06:56	21687.7	12red	106.22	---	---	---	20.387	---	---	---	1021.24	37.309	20.387	---	---	32.962	---	---	---	176.608	---	---	---	59.39	---	---	---
2020-09-01	14:06:57	21688.7	12red	106.09	---	---	---	20.39	---	---	---	1021.23	37.299	20.39	---	---	32.976	---	---	---	176.663	---	---	---	58.982	---	---	---
2020-09-01	14:06:58	21689.7	12red	106.05	---	---	---	20.388	---	---	---	1021.27	37.289	20.388	---	---	32.981	---	---	---	176.653	---	---	---	57.655	---	---	---
2020-09-01	14:06:59	21690.7	12red	106.09	---	---	---	20.387	---	---	---	1021.24	37.276	20.387	---	---	32.977	---	---	---	176.766	---	---	---	68.014	---	---	---
2020-09-01	14:07:00	21691.7	12red	106.23	---	---	---	20.386	---	---	---	1021.24	37.253	20.386	---	---	32.962	---	---	---	176.69	---	---	---	70.695	---	---	---
2020-09-01	14:07:01	21692.7	12red	106.35	---	---	---	20.387	---	---	---	1021.21	37.22	20.387	---	---	32.947	---	---	---	176.62	---	---	---	76.903	---	---	---
2020-09-01	14:07:02	21693.7	12red	106.39	---	---	---	20.39	---	---	---	1021.19	37.21	20.39	---	---	32.943	---	---	---	176.58	---	---	---	74.888	---	---	---
2020-09-01	14:07:03	21694.7	12red	106.35	---	---	---	20.392	---	---	---	1021.16	37.21	20.392	---	---	32.946	---	---	---	176.567	---	---	---	73.314	---	---	---
2020-09-01	14:07:04	21695.7	12red	106.34	---	---	---	20.39	---	---	---	1021.17	37.22	20.39	---	---	32.948	---	---	---	176.559	---	---	---	72.752	---	---	---
2020-09-01	14:07:05	21696.7	12red	106.34	---	---	---	20.387	---	---	---	1021.24	37.22	20.387	---	---	32.949	---	---	---	176.571	---	---	---	71.153	---	---	---
2020-09-01	14:07:06	21697.7	12red	106.4	---	---	---	20.383	---	---	---	1021.26	37.253	20.383	---	---	32.944	---	---	---	176.549	---	---	---	72.793	---	---	---
2020-09-01	14:07:07	21698.7	12red	106.35	---	---	---	20.382	---	---	---	1021.25	37.332	20.382	---	---	32.95	---	---	---	176.554	---	---	---	73.677	---	---	---
2020-09-01	14:07:08	21699.7	12red	105.41	---	---	---	20.38	---	---	---	1021.2	37.421	20.38	---	---	33.056	---	---	---	177.111	---	---	---	76.3	---	---	---
2020-09-01	14:07:09	21700.7	12red	103.76	---	---	---	20.38	---	---	---	1021.18	37.487	20.38	---	---	33.244	---	---	---	178.172	---	---	---	76.8	---	---	---
2020-09-01	14:07:10	21701.7	12red	102.42	---	---	---	20.381	---	---	---	1021.19	37.508	20.381	---	---	33.396	---	---	---	179.05	---	---	---	75.565	---	---	---
2020-09-01	14:07:11	21702.7	12red	102.73	---	---	---	20.383	---	---	---	1021.18	37.518	20.383	---	---	33.361	---	---	---	178.866	---	---	---	74.439	---	---	---
2020-09-01	14:07:12	21703.7	12red	104.13	---	---	---	20.386	---	---	---	1021.2	37.508	20.386	---	---	33.199	---	---	---	177.95	---	---	---	73.774	---	---	---
2020-09-01	14:07:13	21704.7	12red	105.26	---	---	---	20.387	---	---	---	1021.19	37.474	20.387	---	---	33.07	---	---	---	177.195	---	---	---	73.531	---	---	---
2020-09-01	14:07:14	21705.7	12red	105.4	---	---	---	20.388	---	---	---	1021.2	37.385	20.388	---	---	33.054	---	---	---	177.071	---	---	---	72.459	---	---	---
2020-09-01	08:06:41	73.23	12white	315.33	---	---	---	16.891	---	---	---	1021.9	58.976	16.891	---	---	21.391	---	---	---	121.955	---	---	---	18.313	---	---	---
2020-09-01	08:06:42	74.23	12white	298.92	---	---	---	18.558	---	---	---	1021.92	59.236	18.558	---	---	21.392	---	---	---	122.077	---	---	---	18.47	---	---	---
2020-09-01	08:06:43	75.23	12white	282.71	---	---	---	20.227	---	---	---	1021.92	59.526	20.227	---	---	21.384	---	---	---	122.173	---	---	---	18.497	---	---	---
2020-09-01	08:06:44	76.23	12white	282.86	---	---	---	20.232	---	---	---	1021.94	59.604	20.232	---	---	21.377	---	---	---	122.175	---	---	---	18.428	---	---	---
2020-09-01	08:06:45	77.23	12white	282.95	---	---	---	20.234	---	---	---	1021.91	59.681	20.234	---	---	21.372	---	---	---	122.141	---	---	---	18.934	---	---	---
2020-09-01	08:06:46	78.23	12white	282.94	---	---	---	20.236	---	---	---	1021.91	59.719	20.236	---	---	21.372	---	---	---	122.131	---	---	---	18.884	---	---	---
2020-09-01	08:06:47	79.23	12white	282.95	---	---	---	20.237	---	---	---	1021.91	59.709	20.237	---	---	21.371	---	---	---	122.105	---	---	---	18.729	---	---	---
2020-09-01	08:06:48	80.23	12white	283.09	---	---	---	20.237	---	---	---	1021.92	59.701	20.237	---	---	21.366	---	---	---	122.09	---	---	---	18.516	---	---	---
2020-09-01	08:06:49	81.23	12white	283.23	---	---	---	20.238	---	---	---	1021.93	59.719	20.238	---	---	21.36	---	---	---	122.085	---	---	---	17.786	---	---	---
2020-09-01	08:06:50	82.23	12white	283.14	---	---	---	20.235	---	---	---	1021.93	59.747	20.235	---	---	21.365	---	---	---	122.096	---	---	---	17.139	---	---	---
2020-09-01	08:06:51	83.23	12white	283.23	---	---	---	20.235	---	---	---	1021.92	59.747	20.235	---	---	21.361	---	---	---	122.096	---	---	---	17.187	---	---	---
2020-09-01	08:06:52	84.23	12white	283.09	---	---	---	20.233	---	---	---	1021.91	59.699	20.233	---	---	21.367	---	---	---	122.094	---	---	---	17.14	---	---	---
2020-09-01	08:06:53	85.23	12white	283.31	---	---	---	20.234	---	---	---	1021.9	59.643	20.234	---	---	21.358	---	---	---	122.062	---	---	---	17.937	---	---	---
2020-09-01	08:06:54	86.23	12white	283.33	---	---	---	20.235	---	---	---	1021.88	59.595	20.235	---	---	21.357	---	---	---	122.057	---	---	---	18.109	---	---	---
2020-09-01	08:06:55	87.23	12white	283.42	---	---	---	20.236	---	---	---	1021.9	59.556	20.236	---	---	21.353	---	---	---	122.033	---	---	---	18.946	---	---	---
2020-09-01	08:06:56	88.23	12white	283.33	---	---	---	20.235	---	---	---	1021.9	59.516	20.235	---	---	21.357	---	---	---	122.031	---	---	---	18.953	---	---	---
2020-09-01	11:34:32	12543.8	12white	203.73	---	---	---	20.412	---	---	---	1021.61	50.963	20.412	---	---	25.173	---	---	---	142.5	---	---	---	31.393	---	---	---
2020-09-01	11:34:33	12544.8	12white	219.09	---	---	---	20.429	---	---	---	1021.57	50.884	20.429	---	---	24.305	---	---	---	136.789	---	---	---	52.426	---	---	---
2020-09-01	11:34:34	12545.8	12white	234.57	---	---	---	20.456	---	---	---	1021.52	50.757	20.456	---	---	23.428	---	---	---	131.008	---	---	---	70.848	---	---	---
2020-09-01	11:34:35	12546.8	12white	234.65	---	---	---	20.475	---	---	---	1021.53	50.691	20.475	---	---	23.417	---	---	---	130.973	---	---	---	68.967	---	---	---
2020-09-01	11:34:36	12547.8	12white	234.8	---	---	---	20.492	---	---	---	1021.55	50.643	20.492	---	---	23.403	---	---	---	130.838	---	---	---	66.906	---	---	---
2020-09-01	11:34:37	12548.8	12white	234.95	---	---	---	20.504	---	---	---	1021.55	50.605	20.504	---	---	23.392	---	---	---	130.801	---	---	---	68.788	---	---	---
2020-09-01	11:34:38	12549.8	12white	234.9	---	---	---	20.515	---	---	---	1021.54	50.577	20.515	---	---	23.39	---	---	---	130.793	---	---	---	69.906	---	---	---
2020-09-01	11:34:39	12550.8	12white	234.61	---	---	---	20.521	---	---	---	1021.53	50.538	20.521	---	---	23.403	---	---	---	130.878	---	---	---	73.102	---	---	---
2020-09-01	11:34:40	12551.8	12white	234.39	---	---	---	20.525	---	---	---	1021.51	50.528	20.525	---	---	23.412	---	---	---	130.918	---	---	---	72.688	---	---	---
2020-09-01	11:34:41	12552.8	12white	234.33	---	---	---	20.528	---	---	---	1021.49	50.525	20.528	---	---	23.414	---	---	---	130.939	---	---	---	73.772	---	---	---
2020-09-01	11:34:42	12553.8	12white	234.17	---	---	---	20.53	---	---	---	1021.48	50.523	20.53	---	---	23.421	---	---	---	130.982	---	---	---	74.379	---	---	---
2020-09-01	11:34:43	12554.8	12white	233.8	---	---	---	20.529	---	---	---	1021.49	50.503	20.529	---	---	23.44	---	---	---	131.067	---	---	---	75.967	---	---	---
2020-09-01	11:34:44	12555.8	12white	233.39	---	---	---	20.53	---	---	---	1021.51	50.472	20.53	---	---	23.46	---	---	---	131.118	---	---	---	72.644	---	---	---
2020-09-01	11:34:45	12556.8	12white	233.98	---	---	---	20.528	---	---	---	1021.5	50.452	20.528	---	---	23.432	---	---	---	130.967	---	---	---	69.669	---	---	---
2020-09-01	11:34:46	12557.8	12white	241.91	---	---	---	20.527	---	---	---	1021.5	50.442	20.527	---	---	23.06	---	---	---	128.551	---	---	---	69.097	---	---	---
2020-09-01	14:09:54	21865.6	12white	132.09	---	---	---	20.342	---	---	---	1021.21	37.05	20.342	---	---	30.801	---	---	---	163.674	---	---	---	51.434	---	---	---
2020-09-01	14:09:55	21866.6	12white	158.73	---	---	---	20.299	---	---	---	1021.23	36.747	20.299	---	---	28.548	---	---	---	150.312	---	---	---	29.926	---	---	---
2020-09-01	14:09:56	21867.6	12white	185.5	---	---	---	20.256	---	---	---	1021.27	36.513	20.256	---	---	26.275	---	---	---	136.822	---	---	---	9.782	---	---	---
2020-09-01	14:09:57	21868.6	12white	185.31	---	---	---	20.259	---	---	---	1021.27	36.546	20.259	---	---	26.286	---	---	---	136.861	---	---	---	9.789	---	---	---
2020-09-01	14:09:58	21869.6	12white	185.14	---	---	---	20.261	---	---	---	1021.3	36.579	20.261	---	---	26.296	---	---	---	136.871	---	---	---	9.788	---	---	---
2020-09-01	14:09:59	21870.6	12white	184.98	---	---	---	20.262	---	---	---	1021.32	36.612	20.262	---	---	26.306	---	---	---	136.901	---	---	---	9.796	---	---	---
2020-09-01	14:10:00	21871.6	12white	184.66	---	---	---	20.263	---	---	---	1021.29	36.635	20.263	---	---	26.327	---	---	---	136.982	---	---	---	9.815	---	---	---
2020-09-01	14:10:01	21872.6	12white	184.18	---	---	---	20.262	---	---	---	1021.28	36.648	20.262	---	---	26.358	---	---	---	137.147	---	---	---	9.841	---	---	---
2020-09-01	14:10:02	21873.6	12white	183.72	---	---	---	20.265	---	---	---	1021.27	36.648	20.265	---	---	26.387	---	---	---	137.302	---	---	---	9.841	---	---	---
2020-09-01	14:10:03	21874.6	12white	183.32	---	---	---	20.265	---	---	---	1021.3	36.648	20.265	---	---	26.413	---	---	---	137.418	---	---	---	9.835	---	---	---
2020-09-01	14:10:04	21875.6	12white	183.25	---	---	---	20.265	---	---	---	1021.32	36.658	20.265	---	---	26.418	---	---	---	137.464	---	---	---	9.815	---	---	---
2020-09-01	14:10:05	21876.6	12white	183.42	---	---	---	20.263	---	---	---	1021.3	36.691	20.263	---	---	26.408	---	---	---	137.403	---	---	---	9.811	---	---	---
2020-09-01	14:10:06	21877.6	12white	183.83	---	---	---	20.262	---	---	---	1021.24	36.734	20.262	---	---	26.381	---	---	---	137.302	---	---	---	9.806	---	---	---
2020-09-01	14:10:07	21878.6	12white	184	---	---	---	20.263	---	---	---	1021.18	36.801	20.263	---	---	26.369	---	---	---	137.178	---	---	---	9.814	---	---	---
2020-09-01	14:10:08	21879.6	12white	183.9	---	---	---	20.263	---	---	---	1021.15	36.88	20.263	---	---	26.376	---	---	---	137.206	---	---	---	9.819	---	---	---
2020-09-01	08:29:04	1416.4	12yellow	276.51	---	---	---	20.204	---	---	---	1022	65.708	20.204	---	---	21.643	---	---	---	125.582	---	---	---	12.844	---	---	---
2020-09-01	08:29:05	1417.4	12yellow	273.56	---	---	---	20.202	---	---	---	1022.01	66.12	20.202	---	---	21.763	---	---	---	126.755	---	---	---	15.634	---	---	---
2020-09-01	08:29:06	1418.4	12yellow	270.42	---	---	---	20.2	---	---	---	1022.06	66.512	20.2	---	---	21.892	---	---	---	127.947	---	---	---	17.931	---	---	---
2020-09-01	08:29:07	1419.4	12yellow	270.56	---	---	---	20.204	---	---	---	1022.06	66.54	20.204	---	---	21.885	---	---	---	127.938	---	---	---	17.506	---	---	---
2020-09-01	08:29:08	1420.4	12yellow	270.34	---	---	---	20.207	---	---	---	1022.07	66.522	20.207	---	---	21.893	---	---	---	127.931	---	---	---	17.134	---	---	---
2020-09-01	08:29:09	1421.4	12yellow	270.38	---	---	---	20.21	---	---	---	1022.02	66.514	20.21	---	---	21.89	---	---	---	127.931	---	---	---	17.536	---	---	---
2020-09-01	08:29:10	1422.4	12yellow	270.26	---	---	---	20.21	---	---	---	1022.01	66.558	20.21	---	---	21.895	---	---	---	127.941	---	---	---	18.022	---	---	---
2020-09-01	08:29:11	1423.4	12yellow	270.55	---	---	---	20.208	---	---	---	1021.99	66.647	20.208	---	---	21.884	---	---	---	127.944	---	---	---	18.094	---	---	---
2020-09-01	08:29:12	1424.4	12yellow	270.55	---	---	---	20.209	---	---	---	1022.01	66.754	20.209	---	---	21.883	---	---	---	127.931	---	---	---	18.391	---	---	---
2020-09-01	08:29:13	1425.39	12yellow	270.58	---	---	---	20.21	---	---	---	1021.98	66.817	20.21	---	---	21.882	---	---	---	127.907	---	---	---	17.98	---	---	---
2020-09-01	08:29:14	1426.4	12yellow	270.33	---	---	---	20.209	---	---	---	1021.98	66.853	20.209	---	---	21.892	---	---	---	127.886	---	---	---	18.63	---	---	---
2020-09-01	08:29:15	1427.39	12yellow	270.32	---	---	---	20.204	---	---	---	1021.99	66.843	20.204	---	---	21.895	---	---	---	127.882	---	---	---	18.131	---	---	---
2020-09-01	08:29:16	1428.4	12yellow	270.56	---	---	---	20.202	---	---	---	1022	66.832	20.202	---	---	21.885	---	---	---	127.881	---	---	---	18.467	---	---	---
2020-09-01	08:29:17	1429.4	12yellow	270.53	---	---	---	20.203	---	---	---	1022	66.822	20.203	---	---	21.886	---	---	---	127.892	---	---	---	18.39	---	---	---
2020-09-01	08:29:18	1430.4	12yellow	270.55	---	---	---	20.208	---	---	---	1022.01	66.797	20.208	---	---	21.884	---	---	---	127.881	---	---	---	19.125	---	---	---
2020-09-01	08:29:19	1431.4	12yellow	270.39	---	---	---	20.211	---	---	---	1022.05	66.761	20.211	---	---	21.889	---	---	---	127.883	---	---	---	19.407	---	---	---
2020-09-01	08:29:20	1432.4	12yellow	270.59	---	---	---	20.212	---	---	---	1022.06	66.7	20.212	---	---	21.881	---	---	---	127.852	---	---	---	18.808	---	---	---
2020-09-01	08:29:21	1433.4	12yellow	270.63	---	---	---	20.21	---	---	---	1022.04	66.672	20.21	---	---	21.88	---	---	---	127.842	---	---	---	18.571	---	---	---
2020-09-01	11:27:51	12142.7	12yellow	223.41	---	---	---	20.397	---	---	---	1021.61	51.278	20.397	---	---	24.073	---	---	---	135.12	---	---	---	9.71	---	---	---
2020-09-01	11:27:52	12143.7	12yellow	208.98	---	---	---	20.395	---	---	---	1021.63	51.095	20.395	---	---	24.863	---	---	---	140.361	---	---	---	9.631	---	---	---
2020-09-01	11:27:53	12144.7	12yellow	194.21	---	---	---	20.395	---	---	---	1021.64	50.912	20.395	---	---	25.673	---	---	---	145.771	---	---	---	9.588	---	---	---
2020-09-01	11:27:54	12145.7	12yellow	192.88	---	---	---	20.4	---	---	---	1021.66	50.874	20.4	---	---	25.754	---	---	---	146.205	---	---	---	9.518	---	---	---
2020-09-01	11:27:55	12146.7	12yellow	192.16	---	---	---	20.402	---	---	---	1021.67	50.844	20.402	---	---	25.798	---	---	---	146.452	---	---	---	9.542	---	---	---
2020-09-01	11:27:56	12147.7	12yellow	192.65	---	---	---	20.402	---	---	---	1021.67	50.826	20.402	---	---	25.768	---	---	---	146.28	---	---	---	9.51	---	---	---
2020-09-01	11:27:57	12148.7	12yellow	193.78	---	---	---	20.401	---	---	---	1021.67	50.798	20.401	---	---	25.698	---	---	---	145.907	---	---	---	9.544	---	---	---
2020-09-01	11:27:58	12149.7	12yellow	194.55	---	---	---	20.402	---	---	---	1021.67	50.77	20.402	---	---	25.65	---	---	---	145.638	---	---	---	9.523	---	---	---
2020-09-01	11:27:59	12150.7	12yellow	194.65	---	---	---	20.403	---	---	---	1021.66	50.76	20.403	---	---	25.644	---	---	---	145.568	---	---	---	9.512	---	---	---
2020-09-01	11:28:00	12151.7	12yellow	194.76	---	---	---	20.402	---	---	---	1021.64	50.76	20.402	---	---	25.637	---	---	---	145.529	---	---	---	9.532	---	---	---
2020-09-01	11:28:01	12152.7	12yellow	194.69	---	---	---	20.402	---	---	---	1021.61	50.78	20.402	---	---	25.641	---	---	---	145.54	---	---	---	9.553	---	---	---
2020-09-01	11:28:02	12153.7	12yellow	194.69	---	---	---	20.404	---	---	---	1021.61	50.79	20.404	---	---	25.641	---	---	---	145.571	---	---	---	9.541	---	---	---
2020-09-01	11:28:03	12154.7	12yellow	194.78	---	---	---	20.404	---	---	---	1021.61	50.8	20.404	---	---	25.635	---	---	---	145.521	---	---	---	9.513	---	---	---
2020-09-01	11:28:04	12155.7	12yellow	195.14	---	---	---	20.4	---	---	---	1021.59	50.808	20.4	---	---	25.615	---	---	---	145.38	---	---	---	9.584	---	---	---
2020-09-01	11:28:05	12156.7	12yellow	195.35	---	---	---	20.395	---	---	---	1021.59	50.826	20.395	---	---	25.604	---	---	---	145.269	---	---	---	9.637	---	---	---
2020-09-01	11:28:06	12157.7	12yellow	195.48	---	---	---	20.392	---	---	---	1021.59	50.844	20.392	---	---	25.597	---	---	---	145.224	---	---	---	9.739	---	---	---
2020-09-01	11:28:07	12158.7	12yellow	195.4	---	---	---	20.391	---	---	---	1021.64	50.864	20.391	---	---	25.602	---	---	---	145.264	---	---	---	9.629	---	---	---
2020-09-01	11:28:08	12159.7	12yellow	195.21	---	---	---	20.394	---	---	---	1021.66	50.884	20.394	---	---	25.612	---	---	---	145.354	---	---	---	9.66	---	---	---
2020-09-01	14:05:43	21615.1	12yellow	164.78	---	---	---	20.385	---	---	---	1021.23	36.19	20.385	---	---	27.98	---	---	---	148.051	---	---	---	44.562	---	---	---
2020-09-01	14:05:44	21616.1	12yellow	139.45	---	---	---	20.383	---	---	---	1021.22	36.503	20.383	---	---	30.048	---	---	---	160.214	---	---	---	52.413	---	---	---
2020-09-01	14:05:45	21617.1	12yellow	113.77	---	---	---	20.382	---	---	---	1021.18	36.793	20.382	---	---	32.145	---	---	---	172.556	---	---	---	61.564	---	---	---
2020-09-01	14:05:46	21618.1	12yellow	112.99	---	---	---	20.385	---	---	---	1021.12	36.747	20.385	---	---	32.227	---	---	---	173.042	---	---	---	61.605	---	---	---
2020-09-01	14:05:47	21619.1	12yellow	112.61	---	---	---	20.386	---	---	---	1021.11	36.699	20.386	---	---	32.267	---	---	---	173.272	---	---	---	61.265	---	---	---
2020-09-01	14:05:48	21620.1	12yellow	112.62	---	---	---	20.388	---	---	---	1021.13	36.673	20.388	---	---	32.265	---	---	---	173.227	---	---	---	62.399	---	---	---
2020-09-01	14:05:49	21621.1	12yellow	113.47	---	---	---	20.39	---	---	---	1021.16	36.671	20.39	---	---	32.174	---	---	---	172.702	---	---	---	63.412	---	---	---
2020-09-01	14:05:50	21622.1	12yellow	115.7	---	---	---	20.392	---	---	---	1021.19	36.681	20.392	---	---	31.943	---	---	---	171.396	---	---	---	63.953	---	---	---
2020-09-01	14:05:51	21623.1	12yellow	117.93	---	---	---	20.394	---	---	---	1021.2	36.704	20.394	---	---	31.712	---	---	---	170.065	---	---	---	63.245	---	---	---
2020-09-01	14:05:52	21624.1	12yellow	118.75	---	---	---	20.396	---	---	---	1021.24	36.726	20.396	---	---	31.626	---	---	---	169.557	---	---	---	63.46	---	---	---
2020-09-01	14:05:53	21625.1	12yellow	117.52	---	---	---	20.397	---	---	---	1021.24	36.739	20.397	---	---	31.751	---	---	---	170.263	---	---	---	63.083	---	---	---
2020-09-01	14:05:54	21626.1	12yellow	116.02	---	---	---	20.398	---	---	---	1021.25	36.739	20.398	---	---	31.904	---	---	---	171.157	---	---	---	63.426	---	---	---
2020-09-01	14:05:55	21627.1	12yellow	115.69	---	---	---	20.395	---	---	---	1021.22	36.739	20.395	---	---	31.94	---	---	---	171.364	---	---	---	64.202	---	---	---
2020-09-01	14:05:56	21628.1	12yellow	116.66	---	---	---	20.393	---	---	---	1021.21	36.739	20.393	---	---	31.841	---	---	---	170.772	---	---	---	64.974	---	---	---
2020-09-01	14:05:57	21629.1	12yellow	117.95	---	---	---	20.391	---	---	---	1021.21	36.739	20.391	---	---	31.709	---	---	---	169.926	---	---	---	64.681	---	---	---
2020-09-01	14:05:58	21630.1	12yellow	118	---	---	---	20.39	---	---	---	1021.2	36.726	20.39	---	---	31.705	---	---	---	169.907	---	---	---	63.262	---	---	---
2020-09-01	14:05:59	21631.1	12yellow	116.23	---	---	---	20.394	---	---	---	1021.2	36.681	20.394	---	---	31.887	---	---	---	170.932	---	---	---	63.12	---	---	---
2020-09-01	14:06:00	21632.1	12yellow	113.33	---	---	---	20.396	---	---	---	1021.19	36.602	20.396	---	---	32.19	---	---	---	172.672	---	---	---	64.263	---	---	---
2020-09-01	14:06:01	21633.1	12yellow	110.89	---	---	---	20.398	---	---	---	1021.22	36.526	20.398	---	---	32.447	---	---	---	174.107	---	---	---	65.448	---	---	---
2020-09-01	14:06:02	21634.1	12yellow	109.72	---	---	---	20.395	---	---	---	1021.19	36.482	20.395	---	---	32.574	---	---	---	174.839	---	---	---	66	---	---	---
2020-09-01	14:06:03	21635.1	12yellow	109.51	---	---	---	20.395	---	---	---	1021.15	36.482	20.395	---	---	32.597	---	---	---	175.014	---	---	---	69.375	---	---	---
2020-09-01	14:06:04	21636.1	12yellow	109.68	---	---	---	20.397	---	---	---	1021.15	36.503	20.397	---	---	32.577	---	---	---	174.937	---	---	---	74.694	---	---	---
2020-09-01	14:06:05	21637.1	12yellow	109.83	---	---	---	20.398	---	---	---	1021.2	36.523	20.398	---	---	32.56	---	---	---	174.853	---	---	---	79.151	---	---	---
2020-09-01	14:06:06	21638.1	12yellow	109.93	---	---	---	20.398	---	---	---	1021.24	36.546	20.398	---	---	32.55	---	---	---	174.744	---	---	---	80.89	---	---	---
2020-09-01	14:06:07	21639.1	12yellow	110.04	---	---	---	20.398	---	---	---	1021.2	36.569	20.398	---	---	32.538	---	---	---	174.671	---	---	---	80.058	---	---	---
2020-09-01	14:06:08	21640.1	12yellow	110.08	---	---	---	20.396	---	---	---	1021.16	36.602	20.396	---	---	32.534	---	---	---	174.593	---	---	---	74.373	---	---	---
2020-09-01	14:06:09	21641.1	12yellow	110.15	---	---	---	20.395	---	---	---	1021.15	36.645	20.395	---	---	32.527	---	---	---	174.602	---	---	---	67.751	---	---	---
2020-09-01	08:54:52	2963.98	2blue	318.11	---	---	---	15.976	---	---	---	1022.03	69.314	15.976	---	---	21.58	---	---	---	125.246	---	---	---	30.136	---	---	---
2020-09-01	08:54:53	2964.98	2blue	321.54	---	---	---	15.93	---	---	---	1022.03	69.581	15.93	---	---	21.477	---	---	---	124.662	---	---	---	25.251	---	---	---
2020-09-01	08:54:54	2965.98	2blue	325	---	---	---	15.888	---	---	---	1022.07	69.815	15.888	---	---	21.372	---	---	---	124.044	---	---	---	20.819	---	---	---
2020-09-01	08:54:55	2966.98	2blue	325.04	---	---	---	15.89	---	---	---	1022.04	69.798	15.89	---	---	21.37	---	---	---	124.033	---	---	---	20.581	---	---	---
2020-09-01	08:54:56	2967.98	2blue	324.93	---	---	---	15.894	---	---	---	1022.05	69.78	15.894	---	---	21.372	---	---	---	124.001	---	---	---	16.808	---	---	---
2020-09-01	08:54:57	2968.98	2blue	324.83	---	---	---	15.892	---	---	---	1022.02	69.769	15.892	---	---	21.376	---	---	---	124.018	---	---	---	15.87	---	---	---
2020-09-01	08:54:58	2969.98	2blue	324.88	---	---	---	15.894	---	---	---	1022.04	69.787	15.894	---	---	21.374	---	---	---	124.013	---	---	---	15.747	---	---	---
2020-09-01	08:54:59	2970.98	2blue	324.8	---	---	---	15.892	---	---	---	1022.06	69.869	15.892	---	---	21.377	---	---	---	124.025	---	---	---	19.194	---	---	---
2020-09-01	08:55:00	2971.98	2blue	324.97	---	---	---	15.894	---	---	---	1022.04	70.011	15.894	---	---	21.371	---	---	---	124.006	---	---	---	16.872	---	---	---
2020-09-01	08:55:01	2972.98	2blue	325.3	---	---	---	15.892	---	---	---	1022.04	70.197	15.892	---	---	21.36	---	---	---	124.011	---	---	---	15.014	---	---	---
2020-09-01	08:55:02	2973.98	2blue	325.89	---	---	---	15.894	---	---	---	1022.01	70.375	15.894	---	---	21.339	---	---	---	124.011	---	---	---	13.03	---	---	---
2020-09-01	08:55:03	2974.98	2blue	325.9	---	---	---	15.894	---	---	---	1022.04	70.51	15.894	---	---	21.339	---	---	---	124.017	---	---	---	14.343	---	---	---
2020-09-01	08:55:04	2975.98	2blue	326.11	---	---	---	15.895	---	---	---	1021.99	70.573	15.895	---	---	21.331	---	---	---	124.006	---	---	---	14.344	---	---	---
2020-09-01	08:55:05	2976.98	2blue	325.8	---	---	---	15.894	---	---	---	1021.99	70.591	15.894	---	---	21.342	---	---	---	124.009	---	---	---	14.308	---	---	---
2020-09-01	08:55:06	2977.98	2blue	325.79	---	---	---	15.894	---	---	---	1021.99	70.616	15.894	---	---	21.342	---	---	---	124.019	---	---	---	14.793	---	---	---
2020-09-01	11:44:01	13113	2blue	272.44	---	---	---	15.223	---	---	---	1021.3	42.744	15.223	---	---	23.855	---	---	---	126.816	---	---	---	31.537	---	---	---
2020-09-01	11:44:02	13114	2blue	307.29	---	---	---	15.221	---	---	---	1021.31	42.718	15.221	---	---	22.452	---	---	---	117.857	---	---	---	31.329	---	---	---
2020-09-01	11:44:03	13115	2blue	342.24	---	---	---	15.22	---	---	---	1021.3	42.683	15.22	---	---	21.044	---	---	---	108.883	---	---	---	31.12	---	---	---
2020-09-01	11:44:04	13116	2blue	342.52	---	---	---	15.221	---	---	---	1021.28	42.696	15.221	---	---	21.035	---	---	---	108.879	---	---	---	31.131	---	---	---
2020-09-01	11:44:05	13117	2blue	342.46	---	---	---	15.223	---	---	---	1021.24	42.708	15.223	---	---	21.036	---	---	---	108.871	---	---	---	31.155	---	---	---
2020-09-01	11:44:06	13118	2blue	342.6	---	---	---	15.224	---	---	---	1021.25	42.721	15.224	---	---	21.031	---	---	---	108.844	---	---	---	31.162	---	---	---
2020-09-01	11:44:07	13119	2blue	342.54	---	---	---	15.228	---	---	---	1021.23	42.731	15.228	---	---	21.031	---	---	---	108.817	---	---	---	31.183	---	---	---
2020-09-01	11:44:08	13120	2blue	342.77	---	---	---	15.233	---	---	---	1021.27	42.741	15.233	---	---	21.022	---	---	---	108.796	---	---	---	31.327	---	---	---
2020-09-01	11:44:09	13121	2blue	342.62	---	---	---	15.237	---	---	---	1021.26	42.751	15.237	---	---	21.026	---	---	---	108.786	---	---	---	31.579	---	---	---
2020-09-01	11:44:10	13122	2blue	342.51	---	---	---	15.24	---	---	---	1021.29	42.718	15.24	---	---	21.028	---	---	---	108.739	---	---	---	31.954	---	---	---
2020-09-01	11:44:11	13123	2blue	342.4	---	---	---	15.244	---	---	---	1021.27	42.639	15.244	---	---	21.03	---	---	---	108.713	---	---	---	32.189	---	---	---
2020-09-01	11:44:12	13124	2blue	342.29	---	---	---	15.247	---	---	---	1021.23	42.55	15.247	---	---	21.032	---	---	---	108.676	---	---	---	32.338	---	---	---
2020-09-01	11:44:13	13125	2blue	342.34	---	---	---	15.248	---	---	---	1021.22	42.469	15.248	---	---	21.03	---	---	---	108.695	---	---	---	32.125	---	---	---
2020-09-01	11:44:14	13126	2blue	342.14	---	---	---	15.247	---	---	---	1021.22	42.4	15.247	---	---	21.037	---	---	---	108.697	---	---	---	32.005	---	---	---
2020-09-01	11:44:15	13127	2blue	342.27	---	---	---	15.242	---	---	---	1021.22	42.319	15.242	---	---	21.035	---	---	---	108.704	---	---	---	31.66	---	---	---
2020-09-01	11:44:16	13128	2blue	342.1	---	---	---	15.238	---	---	---	1021.23	42.273	15.238	---	---	21.042	---	---	---	108.669	---	---	---	31.684	---	---	---
2020-09-01	14:21:10	22541.5	2blue	245.55	---	---	---	15.691	---	---	---	1021.04	29.723	15.691	---	---	25.285	---	---	---	118.834	---	---	---	69.923	---	---	---
2020-09-01	14:21:11	22542.5	2blue	299.3	---	---	---	15.68	---	---	---	1021.07	29.774	15.68	---	---	22.912	---	---	---	105.89	---	---	---	69.129	---	---	---
2020-09-01	14:21:12	22543.5	2blue	353.28	---	---	---	15.673	---	---	---	1021.06	29.812	15.673	---	---	20.528	---	---	---	92.91	---	---	---	64.687	---	---	---
2020-09-01	14:21:13	22544.5	2blue	353.1	---	---	---	15.675	---	---	---	1021.09	29.746	15.675	---	---	20.532	---	---	---	92.875	---	---	---	62.273	---	---	---
2020-09-01	14:21:14	22545.5	2blue	353.09	---	---	---	15.678	---	---	---	1021.11	29.68	15.678	---	---	20.532	---	---	---	92.869	---	---	---	55.85	---	---	---
2020-09-01	14:21:15	22546.5	2blue	353.31	---	---	---	15.68	---	---	---	1021.15	29.627	15.68	---	---	20.524	---	---	---	92.888	---	---	---	53.028	---	---	---
2020-09-01	14:21:16	22547.5	2blue	353.69	---	---	---	15.684	---	---	---	1021.14	29.566	15.684	---	---	20.511	---	---	---	92.879	---	---	---	50.909	---	---	---
2020-09-01	14:21:17	22548.5	2blue	353.97	---	---	---	15.686	---	---	---	1021.13	29.436	15.686	---	---	20.501	---	---	---	92.858	---	---	---	51.671	---	---	---
2020-09-01	14:21:18	22549.5	2blue	353.65	---	---	---	15.688	---	---	---	1021.09	29.24	15.688	---	---	20.511	---	---	---	92.818	---	---	---	53.283	---	---	---
2020-09-01	14:21:19	22550.5	2blue	353.42	---	---	---	15.688	---	---	---	1021.09	29.039	15.688	---	---	20.518	---	---	---	92.756	---	---	---	56.17	---	---	---
2020-09-01	14:21:20	22551.5	2blue	353.32	---	---	---	15.689	---	---	---	1021.04	28.919	15.689	---	---	20.521	---	---	---	92.78	---	---	---	61.087	---	---	---
2020-09-01	14:21:21	22552.5	2blue	353.42	---	---	---	15.689	---	---	---	1021.06	28.879	15.689	---	---	20.517	---	---	---	92.766	---	---	---	67.218	---	---	---
2020-09-01	14:21:22	22553.5	2blue	353.27	---	---	---	15.688	---	---	---	1021.08	28.904	15.688	---	---	20.522	---	---	---	92.767	---	---	---	73.727	---	---	---
2020-09-01	14:21:23	22554.5	2blue	353.35	---	---	---	15.688	---	---	---	1021.1	28.904	15.688	---	---	20.52	---	---	---	92.723	---	---	---	77.249	---	---	---
2020-09-01	14:21:24	22555.5	2blue	353.42	---	---	---	15.688	---	---	---	1021.09	28.851	15.688	---	---	20.518	---	---	---	92.71	---	---	---	77.549	---	---	---
2020-09-01	14:21:25	22556.5	2blue	353.55	---	---	---	15.691	---	---	---	1021.07	28.744	15.691	---	---	20.512	---	---	---	92.682	---	---	---	77.046	---	---	---
2020-09-01	14:21:26	22557.5	2blue	353.05	---	---	---	15.691	---	---	---	1021.09	28.637	15.691	---	---	20.528	---	---	---	92.682	---	---	---	79.161	---	---	---
2020-09-01	09:06:13	3644.67	2green	321.68	---	---	---	15.585	---	---	---	1022.09	68.272	15.585	---	---	21.6	---	---	---	124.913	---	---	---	21.617	---	---	---
2020-09-01	09:06:14	3645.67	2green	320.48	---	---	---	15.557	---	---	---	1022.05	67.705	15.557	---	---	21.652	---	---	---	124.921	---	---	---	20.553	---	---	---
2020-09-01	09:06:15	3646.67	2green	319.37	---	---	---	15.528	---	---	---	1021.99	67.135	15.528	---	---	21.702	---	---	---	124.937	---	---	---	19.676	---	---	---
2020-09-01	09:06:16	3647.67	2green	319.34	---	---	---	15.529	---	---	---	1021.95	67.099	15.529	---	---	21.703	---	---	---	124.958	---	---	---	21.209	---	---	---
2020-09-01	09:06:17	3648.67	2green	319.35	---	---	---	15.527	---	---	---	1021.96	67.064	15.527	---	---	21.703	---	---	---	124.984	---	---	---	21.369	---	---	---
2020-09-01	09:06:18	3649.67	2green	319.67	---	---	---	15.527	---	---	---	1022	67.028	15.527	---	---	21.692	---	---	---	124.99	---	---	---	21.652	---	---	---
2020-09-01	09:06:19	3650.67	2green	319.95	---	---	---	15.527	---	---	---	1022.02	67.01	15.527	---	---	21.683	---	---	---	124.986	---	---	---	21.9	---	---	---
2020-09-01	09:06:20	3651.67	2green	320.01	---	---	---	15.53	---	---	---	1022.02	67.018	15.53	---	---	21.679	---	---	---	124.98	---	---	---	22.34	---	---	---
2020-09-01	09:06:21	3652.67	2green	320.08	---	---	---	15.532	---	---	---	1022.02	67.028	15.532	---	---	21.676	---	---	---	124.957	---	---	---	22.649	---	---	---
2020-09-01	09:06:22	3653.67	2green	319.93	---	---	---	15.532	---	---	---	1022.02	67.028	15.532	---	---	21.681	---	---	---	124.938	---	---	---	22.917	---	---	---
2020-09-01	09:06:23	3654.67	2green	319.75	---	---	---	15.532	---	---	---	1022.02	67.002	15.532	---	---	21.688	---	---	---	124.935	---	---	---	21.021	---	---	---
2020-09-01	09:06:24	3655.67	2green	319.5	---	---	---	15.534	---	---	---	1022	66.985	15.534	---	---	21.696	---	---	---	124.946	---	---	---	19.879	---	---	---
2020-09-01	09:06:25	3656.67	2green	319.26	---	---	---	15.536	---	---	---	1021.96	66.967	15.536	---	---	21.703	---	---	---	124.949	---	---	---	18.829	---	---	---
2020-09-01	11:47:58	13350.1	2green	304.86	---	---	---	15.239	---	---	---	1021.36	37.062	15.239	---	---	22.346	---	---	---	112.988	---	---	---	45.962	---	---	---
2020-09-01	11:47:59	13351.2	2green	297.91	---	---	---	15.238	---	---	---	1021.36	36.851	15.238	---	---	22.611	---	---	---	114.504	---	---	---	62.782	---	---	---
2020-09-01	11:48:00	13352.1	2green	291.13	---	---	---	15.236	---	---	---	1021.36	36.706	15.236	---	---	22.869	---	---	---	115.99	---	---	---	78.332	---	---	---
2020-09-01	11:48:01	13353.1	2green	291.36	---	---	---	15.24	---	---	---	1021.36	36.818	15.24	---	---	22.858	---	---	---	115.99	---	---	---	77.325	---	---	---
2020-09-01	11:48:02	13354.1	2green	291.46	---	---	---	15.242	---	---	---	1021.36	36.94	15.242	---	---	22.853	---	---	---	116.01	---	---	---	76.091	---	---	---
2020-09-01	11:48:03	13355.2	2green	291.31	---	---	---	15.244	---	---	---	1021.36	37.042	15.244	---	---	22.858	---	---	---	116.038	---	---	---	76.975	---	---	---
2020-09-01	11:48:04	13356.1	2green	291.29	---	---	---	15.246	---	---	---	1021.35	37.108	15.246	---	---	22.858	---	---	---	115.956	---	---	---	78.006	---	---	---
2020-09-01	11:48:05	13357.1	2green	291.32	---	---	---	15.246	---	---	---	1021.35	37.164	15.246	---	---	22.857	---	---	---	115.862	---	---	---	79.56	---	---	---
2020-09-01	11:48:06	13358.2	2green	291.42	---	---	---	15.247	---	---	---	1021.29	37.22	15.247	---	---	22.853	---	---	---	115.802	---	---	---	79.452	---	---	---
2020-09-01	11:48:07	13359.1	2green	291.41	---	---	---	15.247	---	---	---	1021.28	37.286	15.247	---	---	22.853	---	---	---	115.759	---	---	---	80.088	---	---	---
2020-09-01	11:48:08	13360.2	2green	291.38	---	---	---	15.248	---	---	---	1021.28	37.342	15.248	---	---	22.854	---	---	---	115.734	---	---	---	80.208	---	---	---
2020-09-01	11:48:09	13361.1	2green	291.41	---	---	---	15.249	---	---	---	1021.35	37.396	15.249	---	---	22.852	---	---	---	115.735	---	---	---	80.234	---	---	---
2020-09-01	11:48:10	13362.1	2green	291.52	---	---	---	15.25	---	---	---	1021.35	37.408	15.25	---	---	22.848	---	---	---	115.757	---	---	---	79.397	---	---	---
2020-09-01	14:25:19	22791.5	2green	314.42	---	---	---	15.62	---	---	---	1021.22	29.359	15.62	---	---	21.877	---	---	---	98.758	---	---	---	10.709	---	---	---
2020-09-01	14:25:20	22792.5	2green	299.28	---	---	---	15.617	---	---	---	1021.22	29.469	15.617	---	---	22.44	---	---	---	101.865	---	---	---	10.813	---	---	---
2020-09-01	14:25:21	22793.5	2green	284.11	---	---	---	15.613	---	---	---	1021.24	29.565	15.613	---	---	23.005	---	---	---	104.967	---	---	---	10.912	---	---	---
2020-09-01	14:25:22	22794.5	2green	283.91	---	---	---	15.617	---	---	---	1021.22	29.619	15.617	---	---	23.012	---	---	---	104.968	---	---	---	10.893	---	---	---
2020-09-01	14:25:23	22795.5	2green	283.88	---	---	---	15.618	---	---	---	1021.16	29.672	15.618	---	---	23.012	---	---	---	104.968	---	---	---	10.858	---	---	---
2020-09-01	14:25:24	22796.5	2green	284.01	---	---	---	15.62	---	---	---	1021.15	29.738	15.62	---	---	23.006	---	---	---	104.953	---	---	---	10.822	---	---	---
2020-09-01	14:25:25	22797.5	2green	284.11	---	---	---	15.621	---	---	---	1021.13	29.753	15.621	---	---	23.002	---	---	---	104.938	---	---	---	10.839	---	---	---
2020-09-01	14:25:26	22798.5	2green	284.28	---	---	---	15.624	---	---	---	1021.15	29.713	15.624	---	---	22.994	---	---	---	104.903	---	---	---	10.868	---	---	---
2020-09-01	14:25:27	22799.5	2green	284.29	---	---	---	15.626	---	---	---	1021.19	29.634	15.626	---	---	22.993	---	---	---	104.863	---	---	---	10.931	---	---	---
2020-09-01	14:25:28	22800.5	2green	284.55	---	---	---	15.625	---	---	---	1021.2	29.581	15.625	---	---	22.982	---	---	---	104.818	---	---	---	10.842	---	---	---
2020-09-01	14:25:29	22801.5	2green	284.78	---	---	---	15.625	---	---	---	1021.21	29.593	15.625	---	---	22.973	---	---	---	104.775	---	---	---	10.817	---	---	---
2020-09-01	14:25:30	22802.5	2green	285.1	---	---	---	15.625	---	---	---	1021.16	29.631	15.625	---	---	22.96	---	---	---	104.715	---	---	---	10.753	---	---	---
2020-09-01	09:02:16	3408.04	2orange	311.37	---	---	---	15.768	---	---	---	1022.08	68.801	15.768	---	---	21.902	---	---	---	127.116	---	---	---	25.726	---	---	---
2020-09-01	09:02:17	3409.04	2orange	317.02	---	---	---	15.693	---	---	---	1022.08	68.847	15.693	---	---	21.727	---	---	---	126.01	---	---	---	26.153	---	---	---
2020-09-01	09:02:18	3410.04	2orange	322.6	---	---	---	15.62	---	---	---	1022.08	68.903	15.62	---	---	21.554	---	---	---	124.887	---	---	---	23.983	---	---	---
2020-09-01	09:02:19	3411.04	2orange	322.77	---	---	---	15.621	---	---	---	1022.06	68.903	15.621	---	---	21.548	---	---	---	124.909	---	---	---	24.025	---	---	---
2020-09-01	09:02:20	3412.04	2orange	322.64	---	---	---	15.622	---	---	---	1022.04	68.903	15.622	---	---	21.552	---	---	---	124.89	---	---	---	23.984	---	---	---
2020-09-01	09:02:21	3413.04	2orange	322.77	---	---	---	15.624	---	---	---	1021.99	68.91	15.624	---	---	21.547	---	---	---	124.902	---	---	---	23.999	---	---	---
2020-09-01	09:02:22	3414.04	2orange	322.61	---	---	---	15.622	---	---	---	1021.97	68.938	15.622	---	---	21.553	---	---	---	124.906	---	---	---	24.022	---	---	---
2020-09-01	09:02:23	3415.04	2orange	322.64	---	---	---	15.618	---	---	---	1021.97	68.956	15.618	---	---	21.554	---	---	---	124.934	---	---	---	24.027	---	---	---
2020-09-01	09:02:24	3416.04	2orange	322.61	---	---	---	15.611	---	---	---	1022.03	68.966	15.611	---	---	21.557	---	---	---	124.919	---	---	---	24.035	---	---	---
2020-09-01	09:02:25	3417.04	2orange	322.61	---	---	---	15.607	---	---	---	1022.05	68.966	15.607	---	---	21.559	---	---	---	124.902	---	---	---	24.052	---	---	---
2020-09-01	09:02:26	3418.04	2orange	322.84	---	---	---	15.606	---	---	---	1022.06	68.966	15.606	---	---	21.551	---	---	---	124.89	---	---	---	24.077	---	---	---
2020-09-01	09:02:27	3419.04	2orange	323.13	---	---	---	15.608	---	---	---	1022.03	68.956	15.608	---	---	21.54	---	---	---	124.894	---	---	---	24.151	---	---	---
2020-09-01	09:02:28	3420.04	2orange	323.22	---	---	---	15.607	---	---	---	1022.01	68.928	15.607	---	---	21.537	---	---	---	124.883	---	---	---	24.137	---	---	---
2020-09-01	09:02:29	3421.04	2orange	323.07	---	---	---	15.606	---	---	---	1022	68.892	15.606	---	---	21.543	---	---	---	124.877	---	---	---	24.113	---	---	---
2020-09-01	09:02:30	3422.04	2orange	322.8	---	---	---	15.607	---	---	---	1022.01	68.867	15.607	---	---	21.552	---	---	---	124.865	---	---	---	24.094	---	---	---
2020-09-01	09:02:31	3423.04	2orange	322.91	---	---	---	15.609	---	---	---	1022.05	68.849	15.609	---	---	21.547	---	---	---	124.879	---	---	---	24.056	---	---	---
2020-09-01	09:02:32	3424.04	2orange	322.79	---	---	---	15.613	---	---	---	1022.07	68.831	15.613	---	---	21.55	---	---	---	124.891	---	---	---	24.038	---	---	---
2020-09-01	11:47:10	13302.1	2orange	281.19	---	---	---	15.236	---	---	---	1021.32	40.201	15.236	---	---	23.312	---	---	---	121.023	---	---	---	30.984	---	---	---
2020-09-01	11:47:11	13303.1	2orange	296.58	---	---	---	15.234	---	---	---	1021.31	38.937	15.234	---	---	22.695	---	---	---	116.266	---	---	---	30.163	---	---	---
2020-09-01	11:47:12	13304.1	2orange	311.98	---	---	---	15.233	---	---	---	1021.3	37.731	15.233	---	---	22.078	---	---	---	111.518	---	---	---	29.364	---	---	---
2020-09-01	11:47:13	13305.1	2orange	311.98	---	---	---	15.237	---	---	---	1021.29	37.787	15.237	---	---	22.076	---	---	---	111.517	---	---	---	29.393	---	---	---
2020-09-01	11:47:14	13306.1	2orange	311.98	---	---	---	15.24	---	---	---	1021.31	37.843	15.24	---	---	22.075	---	---	---	111.508	---	---	---	29.427	---	---	---
2020-09-01	11:47:15	13307.1	2orange	312.04	---	---	---	15.242	---	---	---	1021.35	37.864	15.242	---	---	22.072	---	---	---	111.5	---	---	---	29.403	---	---	---
2020-09-01	11:47:16	13308.1	2orange	311.68	---	---	---	15.244	---	---	---	1021.38	37.808	15.244	---	---	22.085	---	---	---	111.498	---	---	---	29.369	---	---	---
2020-09-01	11:47:17	13309.1	2orange	311.64	---	---	---	15.245	---	---	---	1021.36	37.642	15.245	---	---	22.086	---	---	---	111.498	---	---	---	29.342	---	---	---
2020-09-01	11:47:18	13310.1	2orange	311.74	---	---	---	15.245	---	---	---	1021.36	37.464	15.245	---	---	22.082	---	---	---	111.474	---	---	---	29.367	---	---	---
2020-09-01	11:47:19	13311.1	2orange	311.91	---	---	---	15.243	---	---	---	1021.35	37.375	15.243	---	---	22.077	---	---	---	111.459	---	---	---	29.381	---	---	---
2020-09-01	11:47:20	13312.1	2orange	312.1	---	---	---	15.241	---	---	---	1021.35	37.352	15.241	---	---	22.07	---	---	---	111.444	---	---	---	29.375	---	---	---
2020-09-01	11:47:21	13313.1	2orange	312.1	---	---	---	15.24	---	---	---	1021.33	37.342	15.24	---	---	22.071	---	---	---	111.445	---	---	---	29.392	---	---	---
2020-09-01	11:47:22	13314.1	2orange	312.06	---	---	---	15.242	---	---	---	1021.31	37.319	15.242	---	---	22.072	---	---	---	111.45	---	---	---	29.434	---	---	---
2020-09-01	11:47:23	13315.1	2orange	311.97	---	---	---	15.243	---	---	---	1021.33	37.296	15.243	---	---	22.074	---	---	---	111.44	---	---	---	29.433	---	---	---
2020-09-01	14:26:13	22845	2orange	300.51	---	---	---	15.618	---	---	---	1021.19	29.987	15.618	---	---	22.393	---	---	---	101.619	---	---	---	10.818	---	---	---
2020-09-01	14:26:14	22846	2orange	315.47	---	---	---	15.611	---	---	---	1021.19	30.331	15.611	---	---	21.842	---	---	---	98.553	---	---	---	10.656	---	---	---
2020-09-01	14:26:15	22847	2orange	330.42	---	---	---	15.607	---	---	---	1021.2	30.661	15.607	---	---	21.291	---	---	---	95.519	---	---	---	10.335	---	---	---
2020-09-01	14:26:16	22848	2orange	330.27	---	---	---	15.613	---	---	---	1021.17	30.674	15.613	---	---	21.294	---	---	---	95.54	---	---	---	9.965	---	---	---
2020-09-01	14:26:17	22849	2orange	330.36	---	---	---	15.616	---	---	---	1021.16	30.689	15.616	---	---	21.29	---	---	---	95.565	---	---	---	9.812	---	---	---
2020-09-01	14:26:18	22850	2orange	330.47	---	---	---	15.618	---	---	---	1021.18	30.705	15.618	---	---	21.285	---	---	---	95.574	---	---	---	9.806	---	---	---
2020-09-01	14:26:19	22851	2orange	330.33	---	---	---	15.618	---	---	---	1021.17	30.72	15.618	---	---	21.29	---	---	---	95.586	---	---	---	9.792	---	---	---
2020-09-01	14:26:20	22852	2orange	330.28	---	---	---	15.619	---	---	---	1021.21	30.733	15.619	---	---	21.291	---	---	---	95.562	---	---	---	9.772	---	---	---
2020-09-01	14:26:21	22853	2orange	330.18	---	---	---	15.621	---	---	---	1021.2	30.745	15.621	---	---	21.294	---	---	---	95.552	---	---	---	9.779	---	---	---
2020-09-01	14:26:22	22854	2orange	330.15	---	---	---	15.627	---	---	---	1021.19	30.745	15.627	---	---	21.293	---	---	---	95.528	---	---	---	9.789	---	---	---
2020-09-01	14:26:23	22855	2orange	330.04	---	---	---	15.637	---	---	---	1021.17	30.745	15.637	---	---	21.293	---	---	---	95.536	---	---	---	9.775	---	---	---
2020-09-01	14:26:24	22856	2orange	330.07	---	---	---	15.646	---	---	---	1021.2	30.771	15.646	---	---	21.288	---	---	---	95.549	---	---	---	9.769	---	---	---
2020-09-01	14:26:25	22857	2orange	330.19	---	---	---	15.649	---	---	---	1021.26	30.819	15.649	---	---	21.283	---	---	---	95.564	---	---	---	9.773	---	---	---
2020-09-01	14:26:26	22858	2orange	330.1	---	---	---	15.647	---	---	---	1021.24	30.88	15.647	---	---	21.287	---	---	---	95.551	---	---	---	9.776	---	---	---
2020-09-01	14:26:27	22859	2orange	330.09	---	---	---	15.643	---	---	---	1021.23	30.928	15.643	---	---	21.289	---	---	---	95.543	---	---	---	9.79	---	---	---
2020-09-01	14:26:28	22860	2orange	330.19	---	---	---	15.636	---	---	---	1021.17	30.954	15.636	---	---	21.288	---	---	---	95.532	---	---	---	9.805	---	---	---
2020-09-01	08:58:05	3157.47	2red	318.8	---	---	---	15.886	---	---	---	1022.04	69.983	15.886	---	---	21.595	---	---	---	125.393	---	---	---	18.105	---	---	---
2020-09-01	08:58:06	3158.47	2red	312.15	---	---	---	15.878	---	---	---	1022.07	69.35	15.878	---	---	21.835	---	---	---	126.833	---	---	---	21.21	---	---	---
2020-09-01	08:58:07	3159.47	2red	305.14	---	---	---	15.871	---	---	---	1022.05	68.701	15.871	---	---	22.089	---	---	---	128.285	---	---	---	23.256	---	---	---
2020-09-01	08:58:08	3160.47	2red	304.98	---	---	---	15.871	---	---	---	1022.05	68.737	15.871	---	---	22.095	---	---	---	128.328	---	---	---	23.593	---	---	---
2020-09-01	08:58:09	3161.47	2red	305.13	---	---	---	15.869	---	---	---	1022.01	68.783	15.869	---	---	22.09	---	---	---	128.299	---	---	---	21.496	---	---	---
2020-09-01	08:58:10	3162.47	2red	305.53	---	---	---	15.867	---	---	---	1022.04	68.819	15.867	---	---	22.076	---	---	---	128.234	---	---	---	21.663	---	---	---
2020-09-01	08:58:11	3163.47	2red	305.84	---	---	---	15.864	---	---	---	1022.04	68.829	15.864	---	---	22.065	---	---	---	128.194	---	---	---	21.351	---	---	---
2020-09-01	08:58:12	3164.47	2red	305.89	---	---	---	15.86	---	---	---	1022.07	68.811	15.86	---	---	22.065	---	---	---	128.174	---	---	---	22.723	---	---	---
2020-09-01	08:58:13	3165.47	2red	305.93	---	---	---	15.855	---	---	---	1022.08	68.801	15.855	---	---	22.065	---	---	---	128.167	---	---	---	23.208	---	---	---
2020-09-01	08:58:14	3166.47	2red	306.09	---	---	---	15.85	---	---	---	1022.06	68.801	15.85	---	---	22.061	---	---	---	128.177	---	---	---	23.097	---	---	---
2020-09-01	08:58:15	3167.47	2red	306.21	---	---	---	15.85	---	---	---	1022.05	68.819	15.85	---	---	22.057	---	---	---	128.13	---	---	---	23.958	---	---	---
2020-09-01	08:58:16	3168.47	2red	306.19	---	---	---	15.85	---	---	---	1022.04	68.829	15.85	---	---	22.057	---	---	---	128.118	---	---	---	24.924	---	---	---
2020-09-01	08:58:17	3169.47	2red	306.2	---	---	---	15.849	---	---	---	1022.06	68.819	15.849	---	---	22.057	---	---	---	128.111	---	---	---	24.781	---	---	---
2020-09-01	08:58:18	3170.47	2red	306.19	---	---	---	15.848	---	---	---	1022.04	68.808	15.848	---	---	22.058	---	---	---	128.124	---	---	---	24.595	---	---	---
2020-09-01	08:58:19	3171.47	2red	306.22	---	---	---	15.846	---	---	---	1022.04	68.79	15.846	---	---	22.058	---	---	---	128.153	---	---	---	23.259	---	---	---
2020-09-01	08:58:20	3172.47	2red	305.97	---	---	---	15.844	---	---	---	1022.04	68.773	15.844	---	---	22.068	---	---	---	128.195	---	---	---	25.493	---	---	---
2020-09-01	11:42:56	13048.3	2red	263.94	---	---	---	18.748	---	---	---	1021.39	47.871	18.748	---	---	22.756	---	---	---	124.09	---	---	---	51.327	---	---	---
2020-09-01	11:42:57	13049.3	2red	251.54	---	---	---	16.988	---	---	---	1021.36	45.274	16.988	---	---	23.969	---	---	---	129.834	---	---	---	42.446	---	---	---
2020-09-01	11:42:58	13050.3	2red	239.09	---	---	---	15.226	---	---	---	1021.32	42.721	15.226	---	---	25.185	---	---	---	135.55	---	---	---	32.02	---	---	---
2020-09-01	11:42:59	13051.3	2red	239.1	---	---	---	15.226	---	---	---	1021.3	42.787	15.226	---	---	25.184	---	---	---	135.572	---	---	---	32.033	---	---	---
2020-09-01	11:43:00	13052.3	2red	239.02	---	---	---	15.225	---	---	---	1021.3	42.863	15.225	---	---	25.189	---	---	---	135.578	---	---	---	32.07	---	---	---
2020-09-01	11:43:01	13053.3	2red	238.96	---	---	---	15.225	---	---	---	1021.29	42.917	15.225	---	---	25.191	---	---	---	135.58	---	---	---	32.07	---	---	---
2020-09-01	11:43:02	13054.3	2red	238.86	---	---	---	15.226	---	---	---	1021.26	42.947	15.226	---	---	25.196	---	---	---	135.591	---	---	---	31.977	---	---	---
2020-09-01	11:43:03	13055.3	2red	238.81	---	---	---	15.227	---	---	---	1021.26	42.947	15.227	---	---	25.198	---	---	---	135.594	---	---	---	32.094	---	---	---
2020-09-01	11:43:04	13056.3	2red	238.78	---	---	---	15.227	---	---	---	1021.28	42.904	15.227	---	---	25.2	---	---	---	135.622	---	---	---	31.869	---	---	---
2020-09-01	11:43:05	13057.3	2red	238.78	---	---	---	15.227	---	---	---	1021.3	42.838	15.227	---	---	25.2	---	---	---	135.621	---	---	---	32.018	---	---	---
2020-09-01	11:43:06	13058.3	2red	238.75	---	---	---	15.227	---	---	---	1021.34	42.792	15.227	---	---	25.201	---	---	---	135.636	---	---	---	31.876	---	---	---
2020-09-01	11:43:07	13059.3	2red	238.53	---	---	---	15.228	---	---	---	1021.33	42.792	15.228	---	---	25.212	---	---	---	135.659	---	---	---	32.021	---	---	---
2020-09-01	11:43:08	13060.3	2red	238.3	---	---	---	15.227	---	---	---	1021.37	42.815	15.227	---	---	25.223	---	---	---	135.7	---	---	---	31.831	---	---	---
2020-09-01	11:43:09	13061.3	2red	237.98	---	---	---	15.227	---	---	---	1021.33	42.805	15.227	---	---	25.24	---	---	---	135.734	---	---	---	31.752	---	---	---
2020-09-01	11:43:10	13062.3	2red	237.79	---	---	---	15.226	---	---	---	1021.32	42.792	15.226	---	---	25.25	---	---	---	135.762	---	---	---	31.746	---	---	---
2020-09-01	14:20:22	22494.2	2red	241.98	---	---	---	18.736	---	---	---	1021.25	35.012	18.736	---	---	23.877	---	---	---	117.994	---	---	---	30.968	---	---	---
2020-09-01	14:20:23	22495.2	2red	218.02	---	---	---	17.21	---	---	---	1021.14	32.624	17.21	---	---	25.697	---	---	---	124.372	---	---	---	51.953	---	---	---
2020-09-01	14:20:24	22496.2	2red	193.85	---	---	---	15.684	---	---	---	1021.02	30.226	15.684	---	---	27.528	---	---	---	130.814	---	---	---	72.758	---	---	---
2020-09-01	14:20:25	22497.2	2red	193.69	---	---	---	15.688	---	---	---	1021	30.201	15.688	---	---	27.536	---	---	---	130.871	---	---	---	72.705	---	---	---
2020-09-01	14:20:26	22498.2	2red	193.59	---	---	---	15.69	---	---	---	1021.02	30.201	15.69	---	---	27.541	---	---	---	130.953	---	---	---	72.792	---	---	---
2020-09-01	14:20:27	22499.2	2red	193.44	---	---	---	15.689	---	---	---	1021.04	30.226	15.689	---	---	27.551	---	---	---	131.006	---	---	---	73.028	---	---	---
2020-09-01	14:20:28	22500.2	2red	193.2	---	---	---	15.689	---	---	---	1021.05	30.226	15.689	---	---	27.567	---	---	---	131.101	---	---	---	72.754	---	---	---
2020-09-01	14:20:29	22501.2	2red	192.91	---	---	---	15.689	---	---	---	1021.06	30.226	15.689	---	---	27.585	---	---	---	131.177	---	---	---	72.797	---	---	---
2020-09-01	14:20:30	22502.2	2red	192.77	---	---	---	15.689	---	---	---	1021.06	30.173	15.689	---	---	27.593	---	---	---	131.266	---	---	---	72.884	---	---	---
2020-09-01	14:20:31	22503.2	2red	192.53	---	---	---	15.69	---	---	---	1021.04	30.092	15.69	---	---	27.608	---	---	---	131.327	---	---	---	73.291	---	---	---
2020-09-01	14:20:32	22504.2	2red	192.3	---	---	---	15.693	---	---	---	1021.05	29.99	15.693	---	---	27.622	---	---	---	131.4	---	---	---	73.491	---	---	---
2020-09-01	14:20:33	22505.2	2red	191.95	---	---	---	15.695	---	---	---	1021.04	29.932	15.695	---	---	27.643	---	---	---	131.473	---	---	---	73.828	---	---	---
2020-09-01	14:20:34	22506.2	2red	191.88	---	---	---	15.697	---	---	---	1021.05	29.911	15.697	---	---	27.647	---	---	---	131.551	---	---	---	73.434	---	---	---
2020-09-01	14:20:35	22507.2	2red	191.77	---	---	---	15.696	---	---	---	1021.05	29.858	15.696	---	---	27.654	---	---	---	131.633	---	---	---	73.422	---	---	---
2020-09-01	14:20:36	22508.2	2red	191.74	---	---	---	15.698	---	---	---	1021.04	29.764	15.698	---	---	27.655	---	---	---	131.679	---	---	---	72.795	---	---	---
2020-09-01	14:20:37	22509.2	2red	191.56	---	---	---	15.699	---	---	---	1021.04	29.685	15.699	---	---	27.666	---	---	---	131.726	---	---	---	72.95	---	---	---
2020-09-01	09:08:54	3806.27	2white	322.32	---	---	---	15.515	---	---	---	1021.99	66.654	15.515	---	---	21.605	---	---	---	124.184	---	---	---	21.368	---	---	---
2020-09-01	09:08:55	3807.27	2white	324.79	---	---	---	15.5	---	---	---	1022.01	66.334	15.5	---	---	21.525	---	---	---	123.433	---	---	---	22.379	---	---	---
2020-09-01	09:08:56	3808.27	2white	327.49	---	---	---	15.483	---	---	---	1022.04	66.014	15.483	---	---	21.437	---	---	---	122.67	---	---	---	23.592	---	---	---
2020-09-01	09:08:57	3809.27	2white	327.37	---	---	---	15.487	---	---	---	1022.01	66.006	15.487	---	---	21.439	---	---	---	122.661	---	---	---	23.144	---	---	---
2020-09-01	09:08:58	3810.28	2white	327.5	---	---	---	15.485	---	---	---	1022	66.014	15.485	---	---	21.436	---	---	---	122.652	---	---	---	23.103	---	---	---
2020-09-01	09:08:59	3811.27	2white	327.43	---	---	---	15.483	---	---	---	1022.02	66.049	15.483	---	---	21.439	---	---	---	122.665	---	---	---	22.913	---	---	---
2020-09-01	09:09:00	3812.27	2white	327.32	---	---	---	15.483	---	---	---	1022.01	66.092	15.483	---	---	21.442	---	---	---	122.669	---	---	---	22.771	---	---	---
2020-09-01	09:09:01	3813.27	2white	327.53	---	---	---	15.482	---	---	---	1022.02	66.128	15.482	---	---	21.436	---	---	---	122.658	---	---	---	22.918	---	---	---
2020-09-01	09:09:02	3814.27	2white	327.81	---	---	---	15.482	---	---	---	1021.99	66.135	15.482	---	---	21.426	---	---	---	122.623	---	---	---	22.984	---	---	---
2020-09-01	09:09:03	3815.27	2white	327.95	---	---	---	15.48	---	---	---	1022.01	66.135	15.48	---	---	21.422	---	---	---	122.595	---	---	---	23.112	---	---	---
2020-09-01	09:09:04	3816.27	2white	328.16	---	---	---	15.475	---	---	---	1022.02	66.135	15.475	---	---	21.417	---	---	---	122.591	---	---	---	23.129	---	---	---
2020-09-01	09:09:05	3817.27	2white	328.2	---	---	---	15.472	---	---	---	1022.05	66.135	15.472	---	---	21.417	---	---	---	122.612	---	---	---	23.15	---	---	---
2020-09-01	09:09:06	3818.27	2white	328.21	---	---	---	15.47	---	---	---	1022.04	66.135	15.47	---	---	21.417	---	---	---	122.655	---	---	---	23.126	---	---	---
2020-09-01	09:09:07	3819.27	2white	327.75	---	---	---	15.473	---	---	---	1022.01	66.135	15.473	---	---	21.432	---	---	---	122.666	---	---	---	23.048	---	---	---
2020-09-01	09:09:08	3820.27	2white	327.93	---	---	---	15.476	---	---	---	1021.97	66.135	15.476	---	---	21.425	---	---	---	122.666	---	---	---	22.955	---	---	---
2020-09-01	09:09:09	3821.27	2white	327.53	---	---	---	15.477	---	---	---	1021.99	66.135	15.477	---	---	21.438	---	---	---	122.664	---	---	---	22.895	---	---	---
2020-09-01	09:09:10	3822.27	2white	327.94	---	---	---	15.473	---	---	---	1022	66.117	15.473	---	---	21.425	---	---	---	122.688	---	---	---	22.949	---	---	---
2020-09-01	11:48:51	13402.9	2white	299.86	---	---	---	15.249	---	---	---	1021.36	37.167	15.249	---	---	22.534	---	---	---	113.894	---	---	---	80.523	---	---	---
2020-09-01	11:48:52	13403.9	2white	307.93	---	---	---	15.251	---	---	---	1021.35	36.925	15.251	---	---	22.23	---	---	---	111.99	---	---	---	82.159	---	---	---
2020-09-01	11:48:53	13404.9	2white	315.85	---	---	---	15.253	---	---	---	1021.34	36.704	15.253	---	---	21.931	---	---	---	110.112	---	---	---	69.785	---	---	---
2020-09-01	11:48:54	13405.9	2white	315.52	---	---	---	15.256	---	---	---	1021.33	36.737	15.256	---	---	21.942	---	---	---	110.1	---	---	---	52.93	---	---	---
2020-09-01	11:48:55	13406.9	2white	315.21	---	---	---	15.257	---	---	---	1021.32	36.76	15.257	---	---	21.953	---	---	---	110.112	---	---	---	35.703	---	---	---
2020-09-01	11:48:56	13407.9	2white	315.09	---	---	---	15.257	---	---	---	1021.31	36.805	15.257	---	---	21.957	---	---	---	110.133	---	---	---	32.248	---	---	---
2020-09-01	11:48:57	13408.9	2white	315.13	---	---	---	15.259	---	---	---	1021.3	36.882	15.259	---	---	21.955	---	---	---	110.135	---	---	---	31.463	---	---	---
2020-09-01	11:48:58	13409.9	2white	315.26	---	---	---	15.261	---	---	---	1021.31	36.971	15.261	---	---	21.949	---	---	---	110.112	---	---	---	31.099	---	---	---
2020-09-01	11:48:59	13410.9	2white	315.46	---	---	---	15.261	---	---	---	1021.33	37.05	15.261	---	---	21.942	---	---	---	110.06	---	---	---	31.118	---	---	---
2020-09-01	11:49:00	13411.9	2white	315.73	---	---	---	15.262	---	---	---	1021.3	37.085	15.262	---	---	21.932	---	---	---	110.034	---	---	---	30.909	---	---	---
2020-09-01	11:49:01	13412.9	2white	315.64	---	---	---	15.263	---	---	---	1021.32	37.098	15.263	---	---	21.935	---	---	---	110.003	---	---	---	31.136	---	---	---
2020-09-01	11:49:02	13413.9	2white	315.84	---	---	---	15.265	---	---	---	1021.28	37.075	15.265	---	---	21.927	---	---	---	109.951	---	---	---	31.388	---	---	---
2020-09-01	14:24:40	22752.5	2white	258.4	---	---	---	15.649	---	---	---	1021.08	28.103	15.649	---	---	24.34	---	---	---	112.741	---	---	---	61.392	---	---	---
2020-09-01	14:24:41	22753.5	2white	294.13	---	---	---	15.636	---	---	---	1021.17	28.41	15.636	---	---	22.821	---	---	---	104.175	---	---	---	36.658	---	---	---
2020-09-01	14:24:42	22754.5	2white	329.61	---	---	---	15.626	---	---	---	1021.26	28.741	15.626	---	---	21.311	---	---	---	95.632	---	---	---	10.578	---	---	---
2020-09-01	14:24:43	22755.5	2white	329.61	---	---	---	15.629	---	---	---	1021.23	28.794	15.629	---	---	21.31	---	---	---	95.638	---	---	---	10.509	---	---	---
2020-09-01	14:24:44	22756.5	2white	329.51	---	---	---	15.632	---	---	---	1021.2	28.835	15.632	---	---	21.312	---	---	---	95.646	---	---	---	10.548	---	---	---
2020-09-01	14:24:45	22757.5	2white	329.61	---	---	---	15.633	---	---	---	1021.2	28.888	15.633	---	---	21.309	---	---	---	95.641	---	---	---	10.64	---	---	---
2020-09-01	14:24:46	22758.5	2white	329.85	---	---	---	15.633	---	---	---	1021.22	28.955	15.633	---	---	21.301	---	---	---	95.645	---	---	---	10.651	---	---	---
2020-09-01	14:24:47	22759.5	2white	329.91	---	---	---	15.632	---	---	---	1021.27	29.036	15.632	---	---	21.299	---	---	---	95.653	---	---	---	10.599	---	---	---
2020-09-01	14:24:48	22760.5	2white	330.04	---	---	---	15.63	---	---	---	1021.24	29.115	15.63	---	---	21.295	---	---	---	95.661	---	---	---	10.516	---	---	---
2020-09-01	14:24:49	22761.5	2white	329.81	---	---	---	15.628	---	---	---	1021.24	29.184	15.628	---	---	21.304	---	---	---	95.661	---	---	---	10.524	---	---	---
2020-09-01	14:24:50	22762.5	2white	329.73	---	---	---	15.627	---	---	---	1021.19	29.25	15.627	---	---	21.307	---	---	---	95.659	---	---	---	10.544	---	---	---
2020-09-01	08:50:10	2681.87	2yellow	281.67	---	---	---	18.807	---	---	---	1021.99	67.997	18.807	---	---	21.971	---	---	---	128.763	---	---	---	29.975	---	---	---
2020-09-01	08:50:11	2682.87	2yellow	298.45	---	---	---	17.413	---	---	---	1021.99	68.585	17.413	---	---	21.818	---	---	---	127.343	---	---	---	32.482	---	---	---
2020-09-01	08:50:12	2683.87	2yellow	315.08	---	---	---	16.02	---	---	---	1022	69.162	16.02	---	---	21.671	---	---	---	125.921	---	---	---	34.657	---	---	---
2020-09-01	08:50:13	2684.87	2yellow	314.85	---	---	---	16.026	---	---	---	1021.98	69.144	16.026	---	---	21.677	---	---	---	125.9	---	---	---	34.974	---	---	---
2020-09-01	08:50:14	2685.87	2yellow	314.81	---	---	---	16.025	---	---	---	1022	69.116	16.025	---	---	21.678	---	---	---	125.916	---	---	---	34.755	---	---	---
2020-09-01	08:50:15	2686.87	2yellow	314.77	---	---	---	16.025	---	---	---	1022	69.091	16.025	---	---	21.68	---	---	---	125.884	---	---	---	35.2	---	---	---
2020-09-01	08:50:16	2687.87	2yellow	314.79	---	---	---	16.024	---	---	---	1021.99	69.073	16.024	---	---	21.679	---	---	---	125.896	---	---	---	35.2	---	---	---
2020-09-01	08:50:17	2688.87	2yellow	314.78	---	---	---	16.026	---	---	---	1022.01	69.055	16.026	---	---	21.679	---	---	---	125.874	---	---	---	35.642	---	---	---
2020-09-01	08:50:18	2689.87	2yellow	314.82	---	---	---	16.026	---	---	---	1022.01	69.037	16.026	---	---	21.677	---	---	---	125.885	---	---	---	35.558	---	---	---
2020-09-01	08:50:19	2690.87	2yellow	315.01	---	---	---	16.026	---	---	---	1022.02	69.009	16.026	---	---	21.671	---	---	---	125.862	---	---	---	35.562	---	---	---
2020-09-01	08:50:20	2691.87	2yellow	314.94	---	---	---	16.025	---	---	---	1022.01	68.984	16.025	---	---	21.674	---	---	---	125.857	---	---	---	35.468	---	---	---
2020-09-01	08:50:21	2692.87	2yellow	315	---	---	---	16.025	---	---	---	1022.01	68.973	16.025	---	---	21.671	---	---	---	125.838	---	---	---	35.643	---	---	---
2020-09-01	08:50:22	2693.87	2yellow	314.89	---	---	---	16.024	---	---	---	1022.03	69.001	16.024	---	---	21.676	---	---	---	125.839	---	---	---	35.492	---	---	---
2020-09-01	08:50:23	2694.87	2yellow	315.02	---	---	---	16.024	---	---	---	1022.01	69.055	16.024	---	---	21.671	---	---	---	125.842	---	---	---	35.195	---	---	---
2020-09-01	08:50:24	2695.87	2yellow	315.12	---	---	---	16.024	---	---	---	1022	69.108	16.024	---	---	21.668	---	---	---	125.851	---	---	---	34.962	---	---	---
2020-09-01	08:50:25	2696.87	2yellow	315.29	---	---	---	16.024	---	---	---	1021.99	69.126	16.024	---	---	21.662	---	---	---	125.859	---	---	---	34.514	---	---	---
2020-09-01	08:50:26	2697.87	2yellow	315.35	---	---	---	16.022	---	---	---	1022.02	69.126	16.022	---	---	21.66	---	---	---	125.821	---	---	---	34.92	---	---	---
2020-09-01	08:50:27	2698.87	2yellow	315.24	---	---	---	16.02	---	---	---	1022.06	69.119	16.02	---	---	21.665	---	---	---	125.83	---	---	---	34.619	---	---	---
2020-09-01	08:50:28	2699.87	2yellow	315.05	---	---	---	16.022	---	---	---	1022.06	69.101	16.022	---	---	21.671	---	---	---	125.844	---	---	---	35.485	---	---	---
2020-09-01	08:50:29	2700.87	2yellow	314.96	---	---	---	16.023	---	---	---	1022.05	69.073	16.023	---	---	21.674	---	---	---	125.852	---	---	---	35.191	---	---	---
2020-09-01	08:50:30	2701.87	2yellow	315	---	---	---	16.025	---	---	---	1022.04	69.037	16.025	---	---	21.672	---	---	---	125.847	---	---	---	35.149	---	---	---
2020-09-01	08:50:31	2702.87	2yellow	315.17	---	---	---	16.02	---	---	---	1022.04	69.002	16.02	---	---	21.667	---	---	---	125.802	---	---	---	34.48	---	---	---
2020-09-01	08:50:32	2703.87	2yellow	315.24	---	---	---	16.02	---	---	---	1022.01	68.976	16.02	---	---	21.665	---	---	---	125.797	---	---	---	34.695	---	---	---
2020-09-01	08:50:33	2704.87	2yellow	315.1	---	---	---	16.019	---	---	---	1021.99	68.976	16.019	---	---	21.67	---	---	---	125.787	---	---	---	35.442	---	---	---
2020-09-01	08:50:34	2705.87	2yellow	314.99	---	---	---	16.02	---	---	---	1021.98	69.019	16.02	---	---	21.674	---	---	---	125.812	---	---	---	35.031	---	---	---
2020-09-01	11:44:56	13167.9	2yellow	316.72	---	---	---	15.234	---	---	---	1021.24	42.154	15.234	---	---	22.003	---	---	---	114.464	---	---	---	31.615	---	---	---
2020-09-01	11:44:57	13168.9	2yellow	291.18	---	---	---	15.231	---	---	---	1021.28	41.981	15.231	---	---	22.97	---	---	---	120.26	---	---	---	31.774	---	---	---
2020-09-01	11:44:58	13169.9	2yellow	265.76	---	---	---	15.234	---	---	---	1021.28	41.775	15.234	---	---	23.93	---	---	---	126.089	---	---	---	31.783	---	---	---
2020-09-01	11:44:59	13170.9	2yellow	265.61	---	---	---	15.239	---	---	---	1021.28	41.686	15.239	---	---	23.935	---	---	---	126.078	---	---	---	31.792	---	---	---
2020-09-01	11:45:00	13171.9	2yellow	265.55	---	---	---	15.243	---	---	---	1021.28	41.673	15.243	---	---	23.936	---	---	---	126.075	---	---	---	31.801	---	---	---
2020-09-01	11:45:01	13172.9	2yellow	265.4	---	---	---	15.242	---	---	---	1021.3	41.703	15.242	---	---	23.943	---	---	---	126.058	---	---	---	31.851	---	---	---
2020-09-01	11:45:02	13173.9	2yellow	265.44	---	---	---	15.241	---	---	---	1021.3	41.724	15.241	---	---	23.941	---	---	---	126.059	---	---	---	31.867	---	---	---
2020-09-01	11:45:03	13174.9	2yellow	265.38	---	---	---	15.238	---	---	---	1021.3	41.744	15.238	---	---	23.945	---	---	---	126.061	---	---	---	31.906	---	---	---
2020-09-01	11:45:04	13175.9	2yellow	265.29	---	---	---	15.236	---	---	---	1021.26	41.721	15.236	---	---	23.95	---	---	---	126.061	---	---	---	31.899	---	---	---
2020-09-01	11:45:05	13176.9	2yellow	265.05	---	---	---	15.236	---	---	---	1021.25	41.676	15.236	---	---	23.961	---	---	---	126.066	---	---	---	31.895	---	---	---
2020-09-01	11:45:06	13177.9	2yellow	264.89	---	---	---	15.237	---	---	---	1021.24	41.61	15.237	---	---	23.967	---	---	---	126.056	---	---	---	31.848	---	---	---
2020-09-01	11:45:07	13178.9	2yellow	265.01	---	---	---	15.238	---	---	---	1021.25	41.576	15.238	---	---	23.961	---	---	---	126.011	---	---	---	31.817	---	---	---
2020-09-01	11:45:08	13179.9	2yellow	265.32	---	---	---	15.239	---	---	---	1021.27	41.543	15.239	---	---	23.947	---	---	---	125.917	---	---	---	31.819	---	---	---
2020-09-01	11:45:09	13180.9	2yellow	265.5	---	---	---	15.239	---	---	---	1021.29	41.508	15.239	---	---	23.939	---	---	---	125.829	---	---	---	31.817	---	---	---
2020-09-01	14:22:08	22600.3	2yellow	308.89	---	---	---	15.682	---	---	---	1021.11	28.5	15.682	---	---	22.339	---	---	---	102.426	---	---	---	84.14	---	---	---
2020-09-01	14:22:09	22601.3	2yellow	264.98	---	---	---	15.675	---	---	---	1021.07	28.37	15.675	---	---	24.137	---	---	---	112.111	---	---	---	87.105	---	---	---
2020-09-01	14:22:10	22602.3	2yellow	221.6	---	---	---	15.672	---	---	---	1021.05	28.225	15.672	---	---	25.915	---	---	---	121.754	---	---	---	87.135	---	---	---
2020-09-01	14:22:11	22603.3	2yellow	221.97	---	---	---	15.675	---	---	---	1021.04	28.152	15.675	---	---	25.894	---	---	---	121.66	---	---	---	86.899	---	---	---
2020-09-01	14:22:12	22604.3	2yellow	222.01	---	---	---	15.672	---	---	---	1021.03	28.152	15.672	---	---	25.893	---	---	---	121.637	---	---	---	88.165	---	---	---
2020-09-01	14:22:13	22605.3	2yellow	222.07	---	---	---	15.669	---	---	---	1021	28.179	15.669	---	---	25.891	---	---	---	121.606	---	---	---	90.035	---	---	---
2020-09-01	14:22:14	22606.3	2yellow	222.19	---	---	---	15.669	---	---	---	1020.97	28.179	15.669	---	---	25.884	---	---	---	121.572	---	---	---	89.035	---	---	---
2020-09-01	14:22:15	22607.3	2yellow	222.72	---	---	---	15.67	---	---	---	1020.98	28.111	15.67	---	---	25.856	---	---	---	121.434	---	---	---	89.519	---	---	---
2020-09-01	14:22:16	22608.3	2yellow	222.97	---	---	---	15.669	---	---	---	1021.03	28.042	15.669	---	---	25.842	---	---	---	121.334	---	---	---	90.669	---	---	---
2020-09-01	14:22:17	22609.3	2yellow	222.82	---	---	---	15.668	---	---	---	1021.03	27.976	15.668	---	---	25.851	---	---	---	121.343	---	---	---	90.244	---	---	---
2020-09-01	14:22:18	22610.3	2yellow	222.57	---	---	---	15.666	---	---	---	1021.02	27.909	15.666	---	---	25.865	---	---	---	121.38	---	---	---	87.832	---	---	---
2020-09-01	14:22:19	22611.3	2yellow	222.58	---	---	---	15.665	---	---	---	1020.99	27.848	15.665	---	---	25.865	---	---	---	121.386	---	---	---	86.082	---	---	---
2020-09-01	09:32:10	5201.58	3blue	330.31	---	---	---	15.274	---	---	---	1021.89	61.202	15.274	---	---	21.42	---	---	---	120.132	---	---	---	39.644	---	---	---
2020-09-01	09:32:11	5202.58	3blue	332.29	---	---	---	15.286	---	---	---	1021.94	60.856	15.286	---	---	21.349	---	---	---	119.552	---	---	---	40.01	---	---	---
2020-09-01	09:32:12	5203.58	3blue	334.24	---	---	---	15.302	---	---	---	1021.98	60.528	15.302	---	---	21.277	---	---	---	118.982	---	---	---	39.993	---	---	---
2020-09-01	09:32:13	5204.58	3blue	334.14	---	---	---	15.305	---	---	---	1021.98	60.558	15.305	---	---	21.279	---	---	---	119	---	---	---	39.608	---	---	---
2020-09-01	09:32:14	5205.58	3blue	334.06	---	---	---	15.306	---	---	---	1022	60.579	15.306	---	---	21.281	---	---	---	118.985	---	---	---	39.089	---	---	---
2020-09-01	09:32:15	5206.58	3blue	333.99	---	---	---	15.306	---	---	---	1021.94	60.589	15.306	---	---	21.283	---	---	---	118.986	---	---	---	39.143	---	---	---
2020-09-01	09:32:16	5207.58	3blue	333.95	---	---	---	15.305	---	---	---	1021.94	60.589	15.305	---	---	21.285	---	---	---	119.005	---	---	---	39.161	---	---	---
2020-09-01	09:32:17	5208.58	3blue	334.1	---	---	---	15.3	---	---	---	1021.94	60.589	15.3	---	---	21.282	---	---	---	119.018	---	---	---	39.709	---	---	---
2020-09-01	09:32:18	5209.58	3blue	333.96	---	---	---	15.29	---	---	---	1021.96	60.589	15.29	---	---	21.29	---	---	---	119.014	---	---	---	39.942	---	---	---
2020-09-01	09:32:19	5210.58	3blue	334.03	---	---	---	15.282	---	---	---	1021.95	60.589	15.282	---	---	21.291	---	---	---	118.983	---	---	---	40.455	---	---	---
2020-09-01	09:32:20	5211.58	3blue	334.03	---	---	---	15.276	---	---	---	1021.95	60.589	15.276	---	---	21.293	---	---	---	118.961	---	---	---	40.667	---	---	---
2020-09-01	09:32:21	5212.58	3blue	334.32	---	---	---	15.271	---	---	---	1021.93	60.579	15.271	---	---	21.285	---	---	---	118.967	---	---	---	40.864	---	---	---
2020-09-01	09:32:22	5213.58	3blue	334.56	---	---	---	15.266	---	---	---	1021.93	60.558	15.266	---	---	21.279	---	---	---	118.972	---	---	---	40.256	---	---	---
2020-09-01	09:32:23	5214.58	3blue	334.62	---	---	---	15.265	---	---	---	1021.91	60.538	15.265	---	---	21.278	---	---	---	118.986	---	---	---	40.743	---	---	---
2020-09-01	11:58:28	13979.9	3blue	322.8	---	---	---	15.302	---	---	---	1021.25	33.031	15.302	---	---	21.676	---	---	---	104.456	---	---	---	44.262	---	---	---
2020-09-01	11:58:29	13980.9	3blue	330.89	---	---	---	15.302	---	---	---	1021.21	32.634	15.302	---	---	21.398	---	---	---	102.693	---	---	---	45.801	---	---	---
2020-09-01	11:58:30	13981.9	3blue	338.9	---	---	---	15.303	---	---	---	1021.19	32.373	15.303	---	---	21.122	---	---	---	100.94	---	---	---	47.294	---	---	---
2020-09-01	11:58:31	13982.9	3blue	338.95	---	---	---	15.307	---	---	---	1021.12	32.413	15.307	---	---	21.119	---	---	---	100.919	---	---	---	47.323	---	---	---
2020-09-01	11:58:32	13983.9	3blue	338.97	---	---	---	15.307	---	---	---	1021.15	32.495	15.307	---	---	21.118	---	---	---	100.909	---	---	---	47.408	---	---	---
2020-09-01	11:58:33	13984.9	3blue	339.02	---	---	---	15.309	---	---	---	1021.15	32.564	15.309	---	---	21.116	---	---	---	100.892	---	---	---	47.581	---	---	---
2020-09-01	11:58:34	13985.9	3blue	339.08	---	---	---	15.308	---	---	---	1021.14	32.589	15.308	---	---	21.114	---	---	---	100.879	---	---	---	47.704	---	---	---
2020-09-01	11:58:35	13986.9	3blue	339.25	---	---	---	15.309	---	---	---	1021.13	32.561	15.309	---	---	21.108	---	---	---	100.857	---	---	---	47.725	---	---	---
2020-09-01	11:58:36	13987.9	3blue	339.1	---	---	---	15.307	---	---	---	1021.14	32.521	15.307	---	---	21.114	---	---	---	100.866	---	---	---	47.568	---	---	---
2020-09-01	11:58:37	13988.9	3blue	338.88	---	---	---	15.309	---	---	---	1021.21	32.414	15.309	---	---	21.12	---	---	---	100.881	---	---	---	47.445	---	---	---
2020-09-01	14:34:44	23356.5	3blue	301.51	---	---	---	15.53	---	---	---	1020.96	29.082	15.53	---	---	22.396	---	---	---	100.952	---	---	---	81.986	---	---	---
2020-09-01	14:34:45	23357.5	3blue	319.01	---	---	---	15.52	---	---	---	1020.94	28.955	15.52	---	---	21.76	---	---	---	97.586	---	---	---	59.382	---	---	---
2020-09-01	14:34:46	23358.5	3blue	336.3	---	---	---	15.512	---	---	---	1020.96	28.772	15.512	---	---	21.13	---	---	---	94.247	---	---	---	37.514	---	---	---
2020-09-01	14:34:47	23359.5	3blue	336.55	---	---	---	15.517	---	---	---	1020.92	28.785	15.517	---	---	21.12	---	---	---	94.231	---	---	---	39.574	---	---	---
2020-09-01	14:34:48	23360.5	3blue	336.4	---	---	---	15.523	---	---	---	1020.94	28.797	15.523	---	---	21.123	---	---	---	94.219	---	---	---	39.477	---	---	---
2020-09-01	14:34:49	23361.5	3blue	336.23	---	---	---	15.532	---	---	---	1020.94	28.851	15.532	---	---	21.125	---	---	---	94.216	---	---	---	39.435	---	---	---
2020-09-01	14:34:50	23362.5	3blue	336.06	---	---	---	15.539	---	---	---	1020.89	28.904	15.539	---	---	21.128	---	---	---	94.211	---	---	---	39.499	---	---	---
2020-09-01	14:34:51	23363.5	3blue	335.74	---	---	---	15.54	---	---	---	1020.86	28.917	15.54	---	---	21.138	---	---	---	94.214	---	---	---	39.593	---	---	---
2020-09-01	14:34:52	23364.5	3blue	335.96	---	---	---	15.537	---	---	---	1020.86	28.929	15.537	---	---	21.132	---	---	---	94.212	---	---	---	39.855	---	---	---
2020-09-01	14:34:53	23365.5	3blue	336.23	---	---	---	15.536	---	---	---	1020.89	28.957	15.536	---	---	21.124	---	---	---	94.187	---	---	---	39.984	---	---	---
2020-09-01	14:34:54	23366.5	3blue	336.34	---	---	---	15.536	---	---	---	1020.91	28.945	15.536	---	---	21.12	---	---	---	94.182	---	---	---	39.967	---	---	---
2020-09-01	14:34:55	23367.5	3blue	336.23	---	---	---	15.536	---	---	---	1020.9	28.838	15.536	---	---	21.124	---	---	---	94.163	---	---	---	39.763	---	---	---
2020-09-01	14:34:56	23368.5	3blue	336.19	---	---	---	15.535	---	---	---	1020.89	28.678	15.535	---	---	21.125	---	---	---	94.175	---	---	---	39.583	---	---	---
2020-09-01	14:34:57	23369.5	3blue	336.31	---	---	---	15.533	---	---	---	1020.91	28.53	15.533	---	---	21.122	---	---	---	94.177	---	---	---	39.563	---	---	---
2020-09-01	09:39:12	5623.53	3green	319.53	---	---	---	15.243	---	---	---	1021.94	59.33	15.243	---	---	21.804	---	---	---	121.576	---	---	---	25.083	---	---	---
2020-09-01	09:39:13	5624.53	3green	320.25	---	---	---	15.248	---	---	---	1021.94	59.379	15.248	---	---	21.777	---	---	---	121.37	---	---	---	24.756	---	---	---
2020-09-01	09:39:14	5625.53	3green	320.88	---	---	---	15.252	---	---	---	1021.9	59.368	15.252	---	---	21.753	---	---	---	121.175	---	---	---	24.488	---	---	---
2020-09-01	09:39:15	5626.53	3green	320.66	---	---	---	15.258	---	---	---	1021.9	59.302	15.258	---	---	21.758	---	---	---	121.172	---	---	---	24.573	---	---	---
2020-09-01	09:39:16	5627.53	3green	320.6	---	---	---	15.257	---	---	---	1021.89	59.233	15.257	---	---	21.761	---	---	---	121.173	---	---	---	24.662	---	---	---
2020-09-01	09:39:17	5628.53	3green	320.72	---	---	---	15.257	---	---	---	1021.91	59.193	15.257	---	---	21.756	---	---	---	121.17	---	---	---	24.81	---	---	---
2020-09-01	09:39:18	5629.53	3green	320.71	---	---	---	15.257	---	---	---	1021.89	59.172	15.257	---	---	21.757	---	---	---	121.174	---	---	---	24.782	---	---	---
2020-09-01	09:39:19	5630.53	3green	320.75	---	---	---	15.259	---	---	---	1021.89	59.144	15.259	---	---	21.755	---	---	---	121.161	---	---	---	24.828	---	---	---
2020-09-01	09:39:20	5631.53	3green	320.72	---	---	---	15.259	---	---	---	1021.91	59.106	15.259	---	---	21.756	---	---	---	121.159	---	---	---	24.796	---	---	---
2020-09-01	09:39:21	5632.53	3green	320.68	---	---	---	15.259	---	---	---	1021.91	59.061	15.259	---	---	21.757	---	---	---	121.157	---	---	---	24.902	---	---	---
2020-09-01	09:39:22	5633.53	3green	320.71	---	---	---	15.258	---	---	---	1021.87	59.033	15.258	---	---	21.757	---	---	---	121.163	---	---	---	24.886	---	---	---
2020-09-01	12:03:13	14265	3green	303.08	---	---	---	15.293	---	---	---	1021.24	30.761	15.293	---	---	22.385	---	---	---	106.967	---	---	---	75.496	---	---	---
2020-09-01	12:03:14	14266	3green	303.12	---	---	---	15.288	---	---	---	1021.28	30.995	15.288	---	---	22.386	---	---	---	107.009	---	---	---	59.779	---	---	---
2020-09-01	12:03:15	14267	3green	303.05	---	---	---	15.282	---	---	---	1021.28	31.203	15.282	---	---	22.391	---	---	---	107.069	---	---	---	40.608	---	---	---
2020-09-01	12:03:16	14268	3green	302.79	---	---	---	15.287	---	---	---	1021.3	30.989	15.287	---	---	22.399	---	---	---	107.087	---	---	---	33.81	---	---	---
2020-09-01	12:03:17	14269	3green	302.91	---	---	---	15.291	---	---	---	1021.32	30.763	15.291	---	---	22.392	---	---	---	107.084	---	---	---	33.889	---	---	---
2020-09-01	12:03:18	14270	3green	303.51	---	---	---	15.293	---	---	---	1021.29	30.616	15.293	---	---	22.369	---	---	---	107.015	---	---	---	36.592	---	---	---
2020-09-01	12:03:19	14271	3green	303.76	---	---	---	15.294	---	---	---	1021.26	30.588	15.294	---	---	22.359	---	---	---	106.963	---	---	---	38.47	---	---	---
2020-09-01	12:03:20	14272	3green	303.41	---	---	---	15.293	---	---	---	1021.26	30.6	15.293	---	---	22.373	---	---	---	107.012	---	---	---	34.407	---	---	---
2020-09-01	12:03:21	14273	3green	302.41	---	---	---	15.297	---	---	---	1021.27	30.575	15.297	---	---	22.409	---	---	---	107.19	---	---	---	30.233	---	---	---
2020-09-01	12:03:22	14274	3green	302.11	---	---	---	15.294	---	---	---	1021.27	30.522	15.294	---	---	22.422	---	---	---	107.282	---	---	---	33.68	---	---	---
2020-09-01	12:03:23	14275	3green	302.22	---	---	---	15.292	---	---	---	1021.25	30.456	15.292	---	---	22.418	---	---	---	107.265	---	---	---	40.216	---	---	---
2020-09-01	12:03:24	14276	3green	302.96	---	---	---	15.286	---	---	---	1021.24	30.456	15.286	---	---	22.393	---	---	---	107.094	---	---	---	46.672	---	---	---
2020-09-01	12:03:25	14277	3green	303.62	---	---	---	15.287	---	---	---	1021.23	30.471	15.287	---	---	22.367	---	---	---	106.958	---	---	---	46.092	---	---	---
2020-09-01	12:03:26	14278	3green	303.76	---	---	---	15.285	---	---	---	1021.22	30.499	15.285	---	---	22.363	---	---	---	106.944	---	---	---	39.081	---	---	---
2020-09-01	14:38:11	23563.3	3green	319.87	---	---	---	15.512	---	---	---	1021.12	30.16	15.512	---	---	21.734	---	---	---	96.769	---	---	---	11.151	---	---	---
2020-09-01	14:38:12	23564.3	3green	302.51	---	---	---	15.511	---	---	---	1021.14	30.216	15.511	---	---	22.368	---	---	---	100.187	---	---	---	11.713	---	---	---
2020-09-01	14:38:13	23565.3	3green	285.17	---	---	---	15.51	---	---	---	1021.16	30.252	15.51	---	---	23.002	---	---	---	103.599	---	---	---	12.28	---	---	---
2020-09-01	14:38:14	23566.3	3green	285.35	---	---	---	15.513	---	---	---	1021.15	30.259	15.513	---	---	22.993	---	---	---	103.565	---	---	---	12.286	---	---	---
2020-09-01	14:38:15	23567.3	3green	285.53	---	---	---	15.513	---	---	---	1021.12	30.267	15.513	---	---	22.986	---	---	---	103.547	---	---	---	12.287	---	---	---
2020-09-01	14:38:16	23568.3	3green	285.44	---	---	---	15.517	---	---	---	1021.12	30.305	15.517	---	---	22.988	---	---	---	103.571	---	---	---	12.266	---	---	---
2020-09-01	14:38:17	23569.3	3green	285.4	---	---	---	15.517	---	---	---	1021.15	30.372	15.517	---	---	22.989	---	---	---	103.604	---	---	---	12.378	---	---	---
2020-09-01	14:38:18	23570.3	3green	285.26	---	---	---	15.521	---	---	---	1021.18	30.45	15.521	---	---	22.994	---	---	---	103.611	---	---	---	12.416	---	---	---
2020-09-01	14:38:19	23571.3	3green	285.41	---	---	---	15.519	---	---	---	1021.19	30.519	15.519	---	---	22.989	---	---	---	103.606	---	---	---	12.532	---	---	---
2020-09-01	14:38:20	23572.3	3green	285.41	---	---	---	15.519	---	---	---	1021.18	30.585	15.519	---	---	22.989	---	---	---	103.59	---	---	---	12.481	---	---	---
2020-09-01	14:38:21	23573.3	3green	285.63	---	---	---	15.517	---	---	---	1021.17	30.626	15.517	---	---	22.98	---	---	---	103.589	---	---	---	12.458	---	---	---
2020-09-01	14:38:22	23574.3	3green	285.65	---	---	---	15.517	---	---	---	1021.17	30.666	15.517	---	---	22.98	---	---	---	103.578	---	---	---	12.368	---	---	---
2020-09-01	14:38:23	23575.3	3green	285.55	---	---	---	15.518	---	---	---	1021.17	30.694	15.518	---	---	22.983	---	---	---	103.59	---	---	---	12.508	---	---	---
2020-09-01	14:38:24	23576.3	3green	285.5	---	---	---	15.516	---	---	---	1021.2	30.722	15.516	---	---	22.986	---	---	---	103.594	---	---	---	12.577	---	---	---
2020-09-01	09:39:58	5669.65	3orange	324.39	---	---	---	15.253	---	---	---	1021.85	58.773	15.253	---	---	21.632	---	---	---	120.316	---	---	---	25.678	---	---	---
2020-09-01	09:39:59	5670.65	3orange	328.12	---	---	---	15.25	---	---	---	1021.84	58.522	15.25	---	---	21.504	---	---	---	119.484	---	---	---	26.363	---	---	---
2020-09-01	09:40:00	5671.65	3orange	331.58	---	---	---	15.25	---	---	---	1021.87	58.29	15.25	---	---	21.385	---	---	---	118.649	---	---	---	27.078	---	---	---
2020-09-01	09:40:01	5672.65	3orange	331.62	---	---	---	15.254	---	---	---	1021.87	58.311	15.254	---	---	21.382	---	---	---	118.643	---	---	---	27.008	---	---	---
2020-09-01	09:40:02	5673.65	3orange	331.75	---	---	---	15.258	---	---	---	1021.88	58.341	15.258	---	---	21.376	---	---	---	118.638	---	---	---	27.071	---	---	---
2020-09-01	09:40:03	5674.65	3orange	332.15	---	---	---	15.257	---	---	---	1021.87	58.359	15.257	---	---	21.363	---	---	---	118.621	---	---	---	27.423	---	---	---
2020-09-01	09:40:04	5675.65	3orange	332.16	---	---	---	15.257	---	---	---	1021.82	58.376	15.257	---	---	21.363	---	---	---	118.583	---	---	---	29.813	---	---	---
2020-09-01	09:40:05	5676.65	3orange	332.56	---	---	---	15.255	---	---	---	1021.82	58.384	15.255	---	---	21.35	---	---	---	118.443	---	---	---	33.662	---	---	---
2020-09-01	09:40:06	5677.65	3orange	332.37	---	---	---	15.255	---	---	---	1021.84	58.384	15.255	---	---	21.357	---	---	---	118.452	---	---	---	36.307	---	---	---
2020-09-01	09:40:07	5678.65	3orange	332.42	---	---	---	15.253	---	---	---	1021.87	58.384	15.253	---	---	21.356	---	---	---	118.48	---	---	---	36.475	---	---	---
2020-09-01	09:40:08	5679.65	3orange	332.16	---	---	---	15.257	---	---	---	1021.88	58.394	15.257	---	---	21.363	---	---	---	118.601	---	---	---	35.172	---	---	---
2020-09-01	09:40:09	5680.65	3orange	332.33	---	---	---	15.26	---	---	---	1021.89	58.386	15.26	---	---	21.356	---	---	---	118.584	---	---	---	34.748	---	---	---
2020-09-01	09:40:10	5681.65	3orange	332.41	---	---	---	15.263	---	---	---	1021.91	58.369	15.263	---	---	21.352	---	---	---	118.572	---	---	---	34.624	---	---	---
2020-09-01	09:40:11	5682.65	3orange	332.26	---	---	---	15.262	---	---	---	1021.91	58.331	15.262	---	---	21.358	---	---	---	118.58	---	---	---	34.412	---	---	---
2020-09-01	09:40:12	5683.65	3orange	332.33	---	---	---	15.26	---	---	---	1021.91	58.31	15.26	---	---	21.356	---	---	---	118.563	---	---	---	34.499	---	---	---
2020-09-01	12:04:11	14323.3	3orange	315.14	---	---	---	15.279	---	---	---	1021.29	30.372	15.279	---	---	21.964	---	---	---	104.782	---	---	---	37.143	---	---	---
2020-09-01	12:04:12	14324.3	3orange	325.97	---	---	---	15.278	---	---	---	1021.34	30.232	15.278	---	---	21.583	---	---	---	102.63	---	---	---	37.205	---	---	---
2020-09-01	12:04:13	14325.3	3orange	337.13	---	---	---	15.275	---	---	---	1021.37	30.079	15.275	---	---	21.191	---	---	---	100.405	---	---	---	42.177	---	---	---
2020-09-01	12:04:14	14326.3	3orange	336.75	---	---	---	15.28	---	---	---	1021.28	30.094	15.28	---	---	21.202	---	---	---	100.415	---	---	---	41.702	---	---	---
2020-09-01	12:04:15	14327.3	3orange	336.49	---	---	---	15.275	---	---	---	1021.24	30.122	15.275	---	---	21.212	---	---	---	100.47	---	---	---	37.726	---	---	---
2020-09-01	12:04:16	14328.3	3orange	336.72	---	---	---	15.272	---	---	---	1021.24	30.188	15.272	---	---	21.206	---	---	---	100.526	---	---	---	34.258	---	---	---
2020-09-01	12:04:17	14329.3	3orange	336.82	---	---	---	15.271	---	---	---	1021.24	30.214	15.271	---	---	21.203	---	---	---	100.542	---	---	---	31.038	---	---	---
2020-09-01	12:04:18	14330.3	3orange	337.48	---	---	---	15.271	---	---	---	1021.23	30.28	15.271	---	---	21.181	---	---	---	100.533	---	---	---	33.398	---	---	---
2020-09-01	12:04:19	14331.3	3orange	337.53	---	---	---	15.272	---	---	---	1021.22	30.361	15.272	---	---	21.179	---	---	---	100.472	---	---	---	48.779	---	---	---
2020-09-01	12:04:20	14332.3	3orange	337.6	---	---	---	15.272	---	---	---	1021.29	30.468	15.272	---	---	21.176	---	---	---	100.436	---	---	---	53.045	---	---	---
2020-09-01	12:04:21	14333.3	3orange	337.31	---	---	---	15.272	---	---	---	1021.31	30.534	15.272	---	---	21.186	---	---	---	100.422	---	---	---	55.08	---	---	---
2020-09-01	12:04:22	14334.3	3orange	336.96	---	---	---	15.273	---	---	---	1021.32	30.534	15.273	---	---	21.197	---	---	---	100.483	---	---	---	42.397	---	---	---
2020-09-01	12:04:23	14335.3	3orange	336.81	---	---	---	15.274	---	---	---	1021.3	30.468	15.274	---	---	21.202	---	---	---	100.531	---	---	---	53.78	---	---	---
2020-09-01	12:04:24	14336.3	3orange	336.9	---	---	---	15.277	---	---	---	1021.28	30.414	15.277	---	---	21.198	---	---	---	100.535	---	---	---	54.486	---	---	---
2020-09-01	12:04:25	14337.3	3orange	336.87	---	---	---	15.279	---	---	---	1021.24	30.399	15.279	---	---	21.198	---	---	---	100.53	---	---	---	51.358	---	---	---
2020-09-01	14:37:16	23508.1	3orange	336.66	---	---	---	15.522	---	---	---	1021.04	28.916	15.522	---	---	21.114	---	---	---	93.901	---	---	---	29.839	---	---	---
2020-09-01	14:37:17	23509.1	3orange	336.9	---	---	---	15.512	---	---	---	1021.09	29.328	15.512	---	---	21.111	---	---	---	93.621	---	---	---	20.216	---	---	---
2020-09-01	14:37:18	23510.1	3orange	337.19	---	---	---	15.506	---	---	---	1021.14	29.781	15.506	---	---	21.103	---	---	---	93.338	---	---	---	10.554	---	---	---
2020-09-01	14:37:19	23511.1	3orange	337.29	---	---	---	15.51	---	---	---	1021.09	29.794	15.51	---	---	21.098	---	---	---	93.341	---	---	---	10.583	---	---	---
2020-09-01	14:37:20	23512.1	3orange	337.46	---	---	---	15.513	---	---	---	1021.09	29.807	15.513	---	---	21.092	---	---	---	93.346	---	---	---	10.553	---	---	---
2020-09-01	14:37:21	23513.1	3orange	337.67	---	---	---	15.514	---	---	---	1021.08	29.835	15.514	---	---	21.085	---	---	---	93.342	---	---	---	10.56	---	---	---
2020-09-01	14:37:22	23514.1	3orange	337.52	---	---	---	15.512	---	---	---	1021.1	29.863	15.512	---	---	21.09	---	---	---	93.353	---	---	---	10.572	---	---	---
2020-09-01	14:37:23	23515.1	3orange	337.39	---	---	---	15.514	---	---	---	1021.1	29.918	15.514	---	---	21.094	---	---	---	93.35	---	---	---	10.592	---	---	---
2020-09-01	14:37:24	23516.1	3orange	337.16	---	---	---	15.514	---	---	---	1021.09	29.959	15.514	---	---	21.101	---	---	---	93.354	---	---	---	10.575	---	---	---
2020-09-01	14:37:25	23517.1	3orange	337.15	---	---	---	15.513	---	---	---	1021.11	30	15.513	---	---	21.102	---	---	---	93.337	---	---	---	10.532	---	---	---
2020-09-01	14:37:26	23518.1	3orange	337.13	---	---	---	15.513	---	---	---	1021.15	30.038	15.513	---	---	21.103	---	---	---	93.343	---	---	---	10.531	---	---	---
2020-09-01	14:37:27	23519.1	3orange	337.19	---	---	---	15.513	---	---	---	1021.15	30.092	15.513	---	---	21.101	---	---	---	93.333	---	---	---	10.565	---	---	---
2020-09-01	09:25:22	4793.96	3red	323.96	---	---	---	15.41	---	---	---	1022.03	64.777	15.41	---	---	21.588	---	---	---	123.086	---	---	---	19.318	---	---	---
2020-09-01	09:25:23	4794.97	3red	320.28	---	---	---	15.348	---	---	---	1021.99	63.437	15.348	---	---	21.74	---	---	---	123.462	---	---	---	15.823	---	---	---
2020-09-01	09:25:24	4795.96	3red	316.35	---	---	---	15.287	---	---	---	1021.97	62.115	15.287	---	---	21.9	---	---	---	123.841	---	---	---	12.213	---	---	---
2020-09-01	09:25:25	4796.96	3red	316.28	---	---	---	15.29	---	---	---	1021.91	62.115	15.29	---	---	21.902	---	---	---	123.865	---	---	---	12.298	---	---	---
2020-09-01	09:25:26	4797.96	3red	316.52	---	---	---	15.291	---	---	---	1021.93	62.115	15.291	---	---	21.893	---	---	---	123.891	---	---	---	12.259	---	---	---
2020-09-01	09:25:27	4798.97	3red	316.39	---	---	---	15.295	---	---	---	1021.96	62.115	15.295	---	---	21.896	---	---	---	123.902	---	---	---	12.253	---	---	---
2020-09-01	09:25:28	4799.96	3red	316.29	---	---	---	15.295	---	---	---	1021.99	62.115	15.295	---	---	21.899	---	---	---	123.902	---	---	---	12.247	---	---	---
2020-09-01	09:25:29	4800.96	3red	316.16	---	---	---	15.291	---	---	---	1021.95	62.115	15.291	---	---	21.905	---	---	---	123.9	---	---	---	12.219	---	---	---
2020-09-01	09:25:30	4801.97	3red	316.2	---	---	---	15.287	---	---	---	1021.94	62.115	15.287	---	---	21.906	---	---	---	123.89	---	---	---	12.232	---	---	---
2020-09-01	09:25:31	4802.96	3red	316.19	---	---	---	15.286	---	---	---	1021.93	62.115	15.286	---	---	21.906	---	---	---	123.876	---	---	---	12.222	---	---	---
2020-09-01	09:25:32	4803.96	3red	316.37	---	---	---	15.288	---	---	---	1021.95	62.125	15.288	---	---	21.899	---	---	---	123.857	---	---	---	12.231	---	---	---
2020-09-01	09:25:33	4804.96	3red	316.49	---	---	---	15.29	---	---	---	1021.95	62.135	15.29	---	---	21.894	---	---	---	123.834	---	---	---	12.221	---	---	---
2020-09-01	09:25:34	4805.96	3red	316.64	---	---	---	15.289	---	---	---	1021.96	62.145	15.289	---	---	21.889	---	---	---	123.827	---	---	---	12.232	---	---	---
2020-09-01	09:25:35	4806.96	3red	316.41	---	---	---	15.289	---	---	---	1021.97	62.155	15.289	---	---	21.897	---	---	---	123.829	---	---	---	12.218	---	---	---
2020-09-01	09:25:36	4807.96	3red	316.42	---	---	---	15.288	---	---	---	1021.96	62.166	15.288	---	---	21.897	---	---	---	123.838	---	---	---	12.211	---	---	---
2020-09-01	09:25:37	4808.96	3red	316.58	---	---	---	15.29	---	---	---	1021.94	62.184	15.29	---	---	21.891	---	---	---	123.823	---	---	---	12.196	---	---	---
2020-09-01	09:25:38	4809.96	3red	316.81	---	---	---	15.29	---	---	---	1021.92	62.191	15.29	---	---	21.883	---	---	---	123.81	---	---	---	12.168	---	---	---
2020-09-01	09:25:39	4810.96	3red	316.7	---	---	---	15.291	---	---	---	1021.93	62.199	15.291	---	---	21.886	---	---	---	123.787	---	---	---	12.154	---	---	---
2020-09-01	09:25:40	4811.96	3red	316.71	---	---	---	15.291	---	---	---	1021.97	62.199	15.291	---	---	21.886	---	---	---	123.79	---	---	---	12.145	---	---	---
2020-09-01	09:25:41	4812.96	3red	316.57	---	---	---	15.296	---	---	---	1021.98	62.199	15.296	---	---	21.889	---	---	---	123.795	---	---	---	12.155	---	---	---
2020-09-01	09:25:42	4813.96	3red	316.54	---	---	---	15.301	---	---	---	1022.01	62.199	15.301	---	---	21.888	---	---	---	123.787	---	---	---	12.171	---	---	---
2020-09-01	09:25:43	4814.96	3red	316.49	---	---	---	15.304	---	---	---	1021.99	62.199	15.304	---	---	21.889	---	---	---	123.772	---	---	---	12.137	---	---	---
2020-09-01	11:56:48	13880	3red	298	---	---	---	15.277	---	---	---	1021.25	36.371	15.277	---	---	22.636	---	---	---	112.772	---	---	---	34.677	---	---	---
2020-09-01	11:56:49	13881	3red	280.76	---	---	---	15.289	---	---	---	1021.17	35.631	15.289	---	---	23.321	---	---	---	115.59	---	---	---	37.922	---	---	---
2020-09-01	11:56:50	13882	3red	262.74	---	---	---	15.304	---	---	---	1021.16	34.914	15.304	---	---	24.036	---	---	---	118.497	---	---	---	41.02	---	---	---
2020-09-01	11:56:51	13883	3red	262.22	---	---	---	15.309	---	---	---	1021.18	34.914	15.309	---	---	24.058	---	---	---	118.637	---	---	---	41.027	---	---	---
2020-09-01	11:56:52	13884	3red	261.26	---	---	---	15.315	---	---	---	1021.16	34.959	15.315	---	---	24.099	---	---	---	118.831	---	---	---	40.99	---	---	---
2020-09-01	11:56:53	13885	3red	260.62	---	---	---	15.316	---	---	---	1021.15	34.995	15.316	---	---	24.127	---	---	---	118.965	---	---	---	40.961	---	---	---
2020-09-01	11:56:54	13886	3red	260.44	---	---	---	15.314	---	---	---	1021.12	35.028	15.314	---	---	24.136	---	---	---	119.002	---	---	---	40.931	---	---	---
2020-09-01	11:56:55	13887	3red	260.33	---	---	---	15.314	---	---	---	1021.13	35.051	15.314	---	---	24.141	---	---	---	119.025	---	---	---	40.92	---	---	---
2020-09-01	11:56:56	13888	3red	260.18	---	---	---	15.315	---	---	---	1021.11	35.028	15.315	---	---	24.147	---	---	---	119.059	---	---	---	40.885	---	---	---
2020-09-01	11:56:57	13889	3red	259.82	---	---	---	15.316	---	---	---	1021.08	34.972	15.316	---	---	24.163	---	---	---	119.101	---	---	---	40.972	---	---	---
2020-09-01	11:56:58	13890	3red	259.56	---	---	---	15.314	---	---	---	1021.09	34.916	15.314	---	---	24.176	---	---	---	119.158	---	---	---	41	---	---	---
2020-09-01	11:56:59	13891	3red	259.39	---	---	---	15.316	---	---	---	1021.1	34.962	15.316	---	---	24.183	---	---	---	119.221	---	---	---	40.968	---	---	---
2020-09-01	11:57:00	13892	3red	259.09	---	---	---	15.316	---	---	---	1021.15	35.04	15.316	---	---	24.197	---	---	---	119.316	---	---	---	40.874	---	---	---
2020-09-01	11:57:01	13893	3red	258.65	---	---	---	15.317	---	---	---	1021.15	35.142	15.317	---	---	24.216	---	---	---	119.428	---	---	---	41.251	---	---	---
2020-09-01	11:57:02	13894	3red	258	---	---	---	15.314	---	---	---	1021.16	35.221	15.314	---	---	24.247	---	---	---	119.568	---	---	---	41.865	---	---	---
2020-09-01	11:57:03	13895	3red	257.56	---	---	---	15.317	---	---	---	1021.14	35.244	15.317	---	---	24.266	---	---	---	119.709	---	---	---	42.343	---	---	---
2020-09-01	14:32:58	23250	3red	288.52	---	---	---	15.592	---	---	---	1021.12	30.626	15.592	---	---	23.167	---	---	---	105.491	---	---	---	41.229	---	---	---
2020-09-01	14:32:59	23251	3red	246.48	---	---	---	15.554	---	---	---	1021.02	30.257	15.554	---	---	25.059	---	---	---	115.479	---	---	---	72.453	---	---	---
2020-09-01	14:33:00	23252	3red	204.34	---	---	---	15.519	---	---	---	1020.93	29.901	15.519	---	---	26.956	---	---	---	125.508	---	---	---	104.57	---	---	---
2020-09-01	14:33:01	23253	3red	203.97	---	---	---	15.525	---	---	---	1020.88	29.873	15.525	---	---	26.975	---	---	---	125.628	---	---	---	105.122	---	---	---
2020-09-01	14:33:02	23254	3red	203.71	---	---	---	15.527	---	---	---	1020.87	29.901	15.527	---	---	26.99	---	---	---	125.672	---	---	---	103.418	---	---	---
2020-09-01	14:33:03	23255	3red	203.43	---	---	---	15.527	---	---	---	1020.96	29.942	15.527	---	---	27.006	---	---	---	125.736	---	---	---	103.064	---	---	---
2020-09-01	14:33:04	23256	3red	203.37	---	---	---	15.523	---	---	---	1020.97	29.97	15.523	---	---	27.011	---	---	---	125.761	---	---	---	102.385	---	---	---
2020-09-01	14:33:05	23257	3red	203.34	---	---	---	15.522	---	---	---	1020.97	29.876	15.522	---	---	27.014	---	---	---	125.83	---	---	---	104.178	---	---	---
2020-09-01	14:33:06	23258	3red	203.36	---	---	---	15.521	---	---	---	1020.91	29.743	15.521	---	---	27.013	---	---	---	125.852	---	---	---	104.589	---	---	---
2020-09-01	14:33:07	23259	3red	203.18	---	---	---	15.523	---	---	---	1020.94	29.636	15.523	---	---	27.023	---	---	---	125.903	---	---	---	104.202	---	---	---
2020-09-01	14:33:08	23260	3red	202.92	---	---	---	15.523	---	---	---	1020.96	29.623	15.523	---	---	27.039	---	---	---	125.935	---	---	---	104.489	---	---	---
2020-09-01	14:33:09	23261	3red	202.84	---	---	---	15.523	---	---	---	1020.94	29.623	15.523	---	---	27.044	---	---	---	125.961	---	---	---	104.718	---	---	---
2020-09-01	14:33:10	23262	3red	202.81	---	---	---	15.522	---	---	---	1020.96	29.595	15.522	---	---	27.045	---	---	---	125.966	---	---	---	104.846	---	---	---
2020-09-01	14:33:11	23263	3red	202.82	---	---	---	15.522	---	---	---	1020.95	29.555	15.522	---	---	27.045	---	---	---	126.001	---	---	---	104.085	---	---	---
2020-09-01	14:33:12	23264	3red	202.7	---	---	---	15.524	---	---	---	1020.95	29.486	15.524	---	---	27.051	---	---	---	126.039	---	---	---	103.524	---	---	---
2020-09-01	14:33:13	23265	3red	202.72	---	---	---	15.525	---	---	---	1020.9	29.433	15.525	---	---	27.05	---	---	---	126.032	---	---	---	103.253	---	---	---
2020-09-01	09:27:43	4934.68	3white	320.42	---	---	---	15.288	---	---	---	1021.99	61.988	15.288	---	---	21.757	---	---	---	122.755	---	---	---	21.196	---	---	---
2020-09-01	09:27:44	4935.68	3white	324.11	---	---	---	15.275	---	---	---	1021.94	61.776	15.275	---	---	21.634	---	---	---	121.787	---	---	---	30.564	---	---	---
2020-09-01	09:27:45	4936.68	3white	327.78	---	---	---	15.262	---	---	---	1021.93	61.565	15.262	---	---	21.51	---	---	---	120.788	---	---	---	39.497	---	---	---
2020-09-01	09:27:46	4937.69	3white	327.55	---	---	---	15.263	---	---	---	1021.92	61.565	15.263	---	---	21.518	---	---	---	120.802	---	---	---	39.783	---	---	---
2020-09-01	09:27:47	4938.68	3white	327.85	---	---	---	15.263	---	---	---	1021.93	61.565	15.263	---	---	21.508	---	---	---	120.789	---	---	---	39.539	---	---	---
2020-09-01	09:27:48	4939.69	3white	327.87	---	---	---	15.264	---	---	---	1021.92	61.575	15.264	---	---	21.507	---	---	---	120.813	---	---	---	39.687	---	---	---
2020-09-01	09:27:49	4940.68	3white	327.78	---	---	---	15.263	---	---	---	1021.93	61.586	15.263	---	---	21.51	---	---	---	120.815	---	---	---	39.433	---	---	---
2020-09-01	09:27:50	4941.68	3white	327.68	---	---	---	15.263	---	---	---	1021.93	61.596	15.263	---	---	21.513	---	---	---	120.809	---	---	---	39.276	---	---	---
2020-09-01	09:27:51	4942.69	3white	327.61	---	---	---	15.259	---	---	---	1021.93	61.596	15.259	---	---	21.517	---	---	---	120.783	---	---	---	39.473	---	---	---
2020-09-01	09:27:52	4943.68	3white	327.85	---	---	---	15.26	---	---	---	1021.92	61.586	15.26	---	---	21.509	---	---	---	120.758	---	---	---	39.619	---	---	---
2020-09-01	09:27:53	4944.68	3white	327.81	---	---	---	15.262	---	---	---	1021.92	61.586	15.262	---	---	21.509	---	---	---	120.744	---	---	---	40.023	---	---	---
2020-09-01	09:27:54	4945.68	3white	327.8	---	---	---	15.27	---	---	---	1021.95	61.575	15.27	---	---	21.507	---	---	---	120.727	---	---	---	40.016	---	---	---
2020-09-01	09:27:55	4946.68	3white	327.85	---	---	---	15.271	---	---	---	1021.96	61.575	15.271	---	---	21.504	---	---	---	120.723	---	---	---	40.046	---	---	---
2020-09-01	09:27:56	4947.68	3white	328.02	---	---	---	15.27	---	---	---	1021.96	61.565	15.27	---	---	21.499	---	---	---	120.697	---	---	---	38.795	---	---	---
2020-09-01	09:27:57	4948.69	3white	328.27	---	---	---	15.267	---	---	---	1021.9	61.565	15.267	---	---	21.492	---	---	---	120.718	---	---	---	38.53	---	---	---
2020-09-01	09:27:58	4949.68	3white	328.31	---	---	---	15.264	---	---	---	1021.89	61.558	15.264	---	---	21.491	---	---	---	120.701	---	---	---	38.244	---	---	---
2020-09-01	11:57:36	13927.7	3white	276.37	---	---	---	15.31	---	---	---	1021.16	34.946	15.31	---	---	23.506	---	---	---	115.289	---	---	---	43.056	---	---	---
2020-09-01	11:57:37	13928.7	3white	295.5	---	---	---	15.306	---	---	---	1021.15	34.55	15.306	---	---	22.732	---	---	---	110.802	---	---	---	43.08	---	---	---
2020-09-01	11:57:38	13929.7	3white	314.56	---	---	---	15.298	---	---	---	1021.19	34.163	15.298	---	---	21.96	---	---	---	106.28	---	---	---	43.424	---	---	---
2020-09-01	11:57:39	13930.7	3white	314.55	---	---	---	15.304	---	---	---	1021.17	34.115	15.304	---	---	21.959	---	---	---	106.266	---	---	---	43.333	---	---	---
2020-09-01	11:57:40	13931.7	3white	314.34	---	---	---	15.305	---	---	---	1021.18	34.196	15.305	---	---	21.966	---	---	---	106.276	---	---	---	43.326	---	---	---
2020-09-01	11:57:41	13932.7	3white	314.29	---	---	---	15.307	---	---	---	1021.14	34.324	15.307	---	---	21.967	---	---	---	106.277	---	---	---	43.281	---	---	---
2020-09-01	11:57:42	13933.7	3white	314.24	---	---	---	15.304	---	---	---	1021.15	34.446	15.304	---	---	21.97	---	---	---	106.283	---	---	---	42.88	---	---	---
2020-09-01	11:57:43	13934.7	3white	314.37	---	---	---	15.306	---	---	---	1021.13	34.491	15.306	---	---	21.964	---	---	---	106.272	---	---	---	42.889	---	---	---
2020-09-01	11:57:44	13935.7	3white	314.51	---	---	---	15.308	---	---	---	1021.16	34.448	15.308	---	---	21.959	---	---	---	106.271	---	---	---	42.907	---	---	---
2020-09-01	11:57:45	13936.7	3white	314.68	---	---	---	15.309	---	---	---	1021.16	34.305	15.309	---	---	21.952	---	---	---	106.255	---	---	---	42.999	---	---	---
2020-09-01	11:57:46	13937.7	3white	314.68	---	---	---	15.306	---	---	---	1021.16	34.104	15.306	---	---	21.953	---	---	---	106.241	---	---	---	43.091	---	---	---
2020-09-01	11:57:47	13938.7	3white	314.59	---	---	---	15.303	---	---	---	1021.16	33.919	15.303	---	---	21.957	---	---	---	106.225	---	---	---	42.946	---	---	---
2020-09-01	11:57:48	13939.7	3white	314.66	---	---	---	15.302	---	---	---	1021.17	33.759	15.302	---	---	21.955	---	---	---	106.21	---	---	---	42.886	---	---	---
2020-09-01	11:57:49	13940.7	3white	314.64	---	---	---	15.303	---	---	---	1021.2	33.627	15.303	---	---	21.956	---	---	---	106.211	---	---	---	42.777	---	---	---
2020-09-01	11:57:50	13941.7	3white	314.81	---	---	---	15.304	---	---	---	1021.21	33.454	15.304	---	---	21.949	---	---	---	106.2	---	---	---	42.767	---	---	---
2020-09-01	14:33:48	23300.1	3white	230.38	---	---	---	15.521	---	---	---	1020.89	29.224	15.521	---	---	25.692	---	---	---	118.798	---	---	---	104.721	---	---	---
2020-09-01	14:33:49	23301.1	3white	257.77	---	---	---	15.52	---	---	---	1020.87	29.044	15.52	---	---	24.345	---	---	---	111.538	---	---	---	104.861	---	---	---
2020-09-01	14:33:50	23302.1	3white	285.13	---	---	---	15.521	---	---	---	1020.87	28.889	15.521	---	---	22.999	---	---	---	104.343	---	---	---	104.41	---	---	---
2020-09-01	14:33:51	23303.1	3white	284.95	---	---	---	15.525	---	---	---	1020.85	28.942	15.525	---	---	23.004	---	---	---	104.351	---	---	---	103.855	---	---	---
2020-09-01	14:33:52	23304.1	3white	284.96	---	---	---	15.526	---	---	---	1020.88	28.996	15.526	---	---	23.003	---	---	---	104.378	---	---	---	103.582	---	---	---
2020-09-01	14:33:53	23305.1	3white	284.86	---	---	---	15.53	---	---	---	1020.86	28.996	15.53	---	---	23.006	---	---	---	104.353	---	---	---	105.322	---	---	---
2020-09-01	14:33:54	23306.1	3white	284.73	---	---	---	15.537	---	---	---	1020.9	28.968	15.537	---	---	23.008	---	---	---	104.352	---	---	---	104.64	---	---	---
2020-09-01	14:33:55	23307.1	3white	284.54	---	---	---	15.542	---	---	---	1020.87	28.98	15.542	---	---	23.015	---	---	---	104.351	---	---	---	105.498	---	---	---
2020-09-01	14:33:56	23308.1	3white	284.35	---	---	---	15.545	---	---	---	1020.88	29.062	15.545	---	---	23.021	---	---	---	104.363	---	---	---	105.29	---	---	---
2020-09-01	14:33:57	23309.1	3white	284.33	---	---	---	15.543	---	---	---	1020.87	29.156	15.543	---	---	23.022	---	---	---	104.35	---	---	---	105.528	---	---	---
2020-09-01	14:33:58	23310.1	3white	284.39	---	---	---	15.546	---	---	---	1020.86	29.222	15.546	---	---	23.019	---	---	---	104.34	---	---	---	105.012	---	---	---
2020-09-01	14:33:59	23311.1	3white	284.58	---	---	---	15.544	---	---	---	1020.89	29.234	15.544	---	---	23.012	---	---	---	104.33	---	---	---	105.739	---	---	---
2020-09-01	14:34:00	23312.1	3white	284.53	---	---	---	15.543	---	---	---	1020.86	29.25	15.543	---	---	23.014	---	---	---	104.305	---	---	---	106.227	---	---	---
2020-09-01	09:38:20	5572.09	3yelllow	329.52	---	---	---	15.255	---	---	---	1021.94	60.047	15.255	---	---	21.457	---	---	---	119.921	---	---	---	35.689	---	---	---
2020-09-01	09:38:21	5573.09	3yelllow	324.22	---	---	---	15.245	---	---	---	1021.93	59.574	15.245	---	---	21.643	---	---	---	120.867	---	---	---	30.983	---	---	---
2020-09-01	09:38:22	5574.09	3yelllow	318.92	---	---	---	15.233	---	---	---	1021.92	59.101	15.233	---	---	21.829	---	---	---	121.801	---	---	---	25.375	---	---	---
2020-09-01	09:38:23	5575.09	3yelllow	318.83	---	---	---	15.234	---	---	---	1021.88	59.119	15.234	---	---	21.832	---	---	---	121.819	---	---	---	25.344	---	---	---
2020-09-01	09:38:24	5576.09	3yelllow	318.75	---	---	---	15.236	---	---	---	1021.91	59.129	15.236	---	---	21.834	---	---	---	121.805	---	---	---	25.386	---	---	---
2020-09-01	09:38:25	5577.09	3yelllow	318.7	---	---	---	15.238	---	---	---	1021.91	59.129	15.238	---	---	21.835	---	---	---	121.8	---	---	---	25.303	---	---	---
2020-09-01	09:38:26	5578.09	3yelllow	318.76	---	---	---	15.239	---	---	---	1021.92	59.111	15.239	---	---	21.832	---	---	---	121.782	---	---	---	25.366	---	---	---
2020-09-01	09:38:27	5579.09	3yelllow	319.09	---	---	---	15.239	---	---	---	1021.88	59.094	15.239	---	---	21.821	---	---	---	121.782	---	---	---	25.434	---	---	---
2020-09-01	09:38:28	5580.09	3yelllow	319.05	---	---	---	15.242	---	---	---	1021.87	59.086	15.242	---	---	21.821	---	---	---	121.781	---	---	---	25.54	---	---	---
2020-09-01	09:38:29	5581.09	3yelllow	318.91	---	---	---	15.242	---	---	---	1021.87	59.094	15.242	---	---	21.826	---	---	---	121.779	---	---	---	25.566	---	---	---
2020-09-01	09:38:30	5582.09	3yelllow	318.8	---	---	---	15.243	---	---	---	1021.91	59.122	15.243	---	---	21.83	---	---	---	121.781	---	---	---	25.519	---	---	---
2020-09-01	09:38:31	5583.09	3yelllow	318.94	---	---	---	15.244	---	---	---	1021.9	59.16	15.244	---	---	21.825	---	---	---	121.798	---	---	---	25.406	---	---	---
2020-09-01	09:38:32	5584.09	3yelllow	318.96	---	---	---	15.245	---	---	---	1021.9	59.208	15.245	---	---	21.823	---	---	---	121.805	---	---	---	25.385	---	---	---
2020-09-01	09:38:33	5585.09	3yelllow	318.75	---	---	---	15.245	---	---	---	1021.91	59.256	15.245	---	---	21.831	---	---	---	121.803	---	---	---	25.355	---	---	---
2020-09-01	12:02:18	14210	3yellow	326.73	---	---	---	15.3	---	---	---	1021.28	32.027	15.3	---	---	21.551	---	---	---	102.918	---	---	---	60.272	---	---	---
2020-09-01	12:02:19	14211	3yellow	314.48	---	---	---	15.292	---	---	---	1021.32	31.493	15.292	---	---	21.986	---	---	---	104.99	---	---	---	74.072	---	---	---
2020-09-01	12:02:20	14212	3yellow	302.21	---	---	---	15.286	---	---	---	1021.35	30.941	15.286	---	---	22.421	---	---	---	107.046	---	---	---	89.57	---	---	---
2020-09-01	12:02:21	14213	3yellow	301.94	---	---	---	15.288	---	---	---	1021.32	30.702	15.288	---	---	22.43	---	---	---	107.095	---	---	---	90.19	---	---	---
2020-09-01	12:02:22	14214	3yellow	302.24	---	---	---	15.288	---	---	---	1021.33	30.575	15.288	---	---	22.419	---	---	---	107.055	---	---	---	88.642	---	---	---
2020-09-01	12:02:23	14215	3yellow	302.5	---	---	---	15.288	---	---	---	1021.28	30.56	15.288	---	---	22.409	---	---	---	107.037	---	---	---	86.484	---	---	---
2020-09-01	12:02:24	14216	3yellow	302.79	---	---	---	15.29	---	---	---	1021.23	30.567	15.29	---	---	22.397	---	---	---	107.032	---	---	---	87.009	---	---	---
2020-09-01	12:02:25	14217	3yellow	302.59	---	---	---	15.291	---	---	---	1021.2	30.583	15.291	---	---	22.404	---	---	---	107.092	---	---	---	99.61	---	---	---
2020-09-01	12:02:26	14218	3yellow	302.75	---	---	---	15.295	---	---	---	1021.18	30.583	15.295	---	---	22.397	---	---	---	107.049	---	---	---	99.919	---	---	---
2020-09-01	12:02:27	14219	3yellow	302.71	---	---	---	15.297	---	---	---	1021.22	30.514	15.297	---	---	22.397	---	---	---	107.006	---	---	---	99.965	---	---	---
2020-09-01	14:39:11	23622.5	3yellow	277.45	---	---	---	15.512	---	---	---	1021.22	30.944	15.512	---	---	23.33	---	---	---	105.444	---	---	---	12.677	---	---	---
2020-09-01	14:39:12	23623.5	3yellow	269.51	---	---	---	15.507	---	---	---	1021.26	31.152	15.507	---	---	23.671	---	---	---	107.279	---	---	---	12.651	---	---	---
2020-09-01	14:39:13	23624.5	3yellow	261.45	---	---	---	15.508	---	---	---	1021.21	31.389	15.508	---	---	24.014	---	---	---	109.103	---	---	---	12.747	---	---	---
2020-09-01	14:39:14	23625.5	3yellow	261.55	---	---	---	15.512	---	---	---	1021.18	31.43	15.512	---	---	24.008	---	---	---	109.042	---	---	---	12.778	---	---	---
2020-09-01	14:39:15	23626.5	3yellow	261.87	---	---	---	15.517	---	---	---	1021.14	31.483	15.517	---	---	23.991	---	---	---	108.973	---	---	---	12.81	---	---	---
2020-09-01	14:39:16	23627.5	3yellow	262.4	---	---	---	15.515	---	---	---	1021.21	31.508	15.515	---	---	23.969	---	---	---	108.896	---	---	---	12.803	---	---	---
2020-09-01	14:39:17	23628.5	3yellow	263.07	---	---	---	15.517	---	---	---	1021.22	31.521	15.517	---	---	23.938	---	---	---	108.835	---	---	---	12.769	---	---	---
2020-09-01	14:39:18	23629.5	3yellow	263.42	---	---	---	15.517	---	---	---	1021.23	31.521	15.517	---	---	23.922	---	---	---	108.774	---	---	---	12.614	---	---	---
2020-09-01	14:39:19	23630.5	3yellow	263.85	---	---	---	15.52	---	---	---	1021.21	31.521	15.52	---	---	23.902	---	---	---	108.696	---	---	---	12.55	---	---	---
2020-09-01	14:39:20	23631.5	3yellow	264.01	---	---	---	15.516	---	---	---	1021.21	31.536	15.516	---	---	23.896	---	---	---	108.604	---	---	---	12.566	---	---	---
2020-09-01	14:39:21	23632.5	3yellow	264.54	---	---	---	15.514	---	---	---	1021.21	31.552	15.514	---	---	23.874	---	---	---	108.506	---	---	---	12.688	---	---	---
2020-09-01	14:39:22	23633.5	3yellow	264.74	---	---	---	15.514	---	---	---	1021.17	31.567	15.514	---	---	23.865	---	---	---	108.404	---	---	---	12.768	---	---	---
2020-09-01	14:39:23	23634.5	3yellow	265.14	---	---	---	15.515	---	---	---	1021.16	31.58	15.515	---	---	23.847	---	---	---	108.36	---	---	---	12.79	---	---	---
2020-09-01	14:39:24	23635.5	3yellow	265.33	---	---	---	15.518	---	---	---	1021.18	31.605	15.518	---	---	23.837	---	---	---	108.318	---	---	---	12.822	---	---	---
2020-09-01	14:39:25	23636.5	3yellow	265.6	---	---	---	15.516	---	---	---	1021.21	31.643	15.516	---	---	23.826	---	---	---	108.319	---	---	---	12.822	---	---	---
2020-09-01	14:39:26	23637.5	3yellow	265.63	---	---	---	15.516	---	---	---	1021.28	31.689	15.516	---	---	23.825	---	---	---	108.292	---	---	---	12.826	---	---	---
2020-09-01	14:39:27	23638.5	3yellow	265.49	---	---	---	15.515	---	---	---	1021.28	31.75	15.515	---	---	23.831	---	---	---	108.31	---	---	---	12.936	---	---	---
2020-09-01	14:39:28	23639.5	3yellow	265.14	---	---	---	15.515	---	---	---	1021.24	31.798	15.515	---	---	23.847	---	---	---	108.364	---	---	---	12.935	---	---	---
2020-09-01	10:52:43	10034.7	6blue	332.31	---	---	---	15.451	---	---	---	1021.73	49.613	15.451	---	---	21.286	---	---	---	110.133	---	---	---	48.223	---	---	---
2020-09-01	10:52:44	10035.7	6blue	333.68	---	---	---	15.413	---	---	---	1021.7	49.681	15.413	---	---	21.254	---	---	---	110.224	---	---	---	50.312	---	---	---
2020-09-01	10:52:45	10036.7	6blue	334.99	---	---	---	15.378	---	---	---	1021.7	49.76	15.378	---	---	21.223	---	---	---	110.313	---	---	---	51.856	---	---	---
2020-09-01	10:52:46	10037.7	6blue	334.91	---	---	---	15.382	---	---	---	1021.71	49.793	15.382	---	---	21.224	---	---	---	110.316	---	---	---	51.334	---	---	---
2020-09-01	10:52:47	10038.7	6blue	334.79	---	---	---	15.386	---	---	---	1021.7	49.826	15.386	---	---	21.227	---	---	---	110.329	---	---	---	51.44	---	---	---
2020-09-01	10:52:48	10039.7	6blue	334.64	---	---	---	15.388	---	---	---	1021.72	49.837	15.388	---	---	21.231	---	---	---	110.337	---	---	---	51.185	---	---	---
2020-09-01	10:52:49	10040.7	6blue	334.46	---	---	---	15.388	---	---	---	1021.69	49.847	15.388	---	---	21.237	---	---	---	110.355	---	---	---	50.786	---	---	---
2020-09-01	10:52:50	10041.7	6blue	334.55	---	---	---	15.389	---	---	---	1021.72	49.837	15.389	---	---	21.234	---	---	---	110.369	---	---	---	50.526	---	---	---
2020-09-01	10:52:51	10042.7	6blue	334.61	---	---	---	15.389	---	---	---	1021.72	49.837	15.389	---	---	21.232	---	---	---	110.38	---	---	---	50.465	---	---	---
2020-09-01	10:52:52	10043.7	6blue	334.68	---	---	---	15.389	---	---	---	1021.73	49.837	15.389	---	---	21.229	---	---	---	110.401	---	---	---	50.597	---	---	---
2020-09-01	10:52:53	10044.7	6blue	334.25	---	---	---	15.391	---	---	---	1021.74	49.86	15.391	---	---	21.243	---	---	---	110.418	---	---	---	50.813	---	---	---
2020-09-01	10:52:54	10045.7	6blue	334.33	---	---	---	15.392	---	---	---	1021.74	49.893	15.392	---	---	21.24	---	---	---	110.439	---	---	---	50.989	---	---	---
2020-09-01	10:52:55	10046.7	6blue	334.23	---	---	---	15.394	---	---	---	1021.73	49.938	15.394	---	---	21.242	---	---	---	110.437	---	---	---	50.967	---	---	---
2020-09-01	10:52:56	10047.7	6blue	334.38	---	---	---	15.395	---	---	---	1021.69	49.971	15.395	---	---	21.237	---	---	---	110.452	---	---	---	50.763	---	---	---
2020-09-01	10:52:57	10048.7	6blue	334.27	---	---	---	15.397	---	---	---	1021.68	49.994	15.397	---	---	21.24	---	---	---	110.45	---	---	---	50.786	---	---	---
2020-09-01	12:46:25	16856.7	6blue	317.67	---	---	---	15.306	---	---	---	1021.22	28.24	15.306	---	---	21.86	---	---	---	102.709	---	---	---	33.643	---	---	---
2020-09-01	12:46:26	16857.7	6blue	327.6	---	---	---	15.303	---	---	---	1021.21	28.474	15.303	---	---	21.514	---	---	---	100.659	---	---	---	33.301	---	---	---
2020-09-01	12:46:27	16858.7	6blue	337.79	---	---	---	15.297	---	---	---	1021.2	28.736	15.297	---	---	21.16	---	---	---	98.629	---	---	---	32.905	---	---	---
2020-09-01	12:46:28	16859.7	6blue	337.45	---	---	---	15.299	---	---	---	1021.12	28.802	15.299	---	---	21.171	---	---	---	98.61	---	---	---	32.727	---	---	---
2020-09-01	12:46:29	16860.7	6blue	337.48	---	---	---	15.3	---	---	---	1021.11	28.868	15.3	---	---	21.17	---	---	---	98.634	---	---	---	32.564	---	---	---
2020-09-01	12:46:30	16861.7	6blue	337.37	---	---	---	15.302	---	---	---	1021.1	28.922	15.302	---	---	21.173	---	---	---	98.647	---	---	---	32.356	---	---	---
2020-09-01	12:46:31	16862.7	6blue	337.68	---	---	---	15.302	---	---	---	1021.12	28.962	15.302	---	---	21.162	---	---	---	98.661	---	---	---	32.534	---	---	---
2020-09-01	12:46:32	16863.7	6blue	337.85	---	---	---	15.304	---	---	---	1021.13	28.99	15.304	---	---	21.156	---	---	---	98.653	---	---	---	32.761	---	---	---
2020-09-01	12:46:33	16864.7	6blue	338.06	---	---	---	15.305	---	---	---	1021.13	29.016	15.305	---	---	21.149	---	---	---	98.631	---	---	---	32.977	---	---	---
2020-09-01	12:46:34	16865.7	6blue	337.85	---	---	---	15.307	---	---	---	1021.16	28.962	15.307	---	---	21.155	---	---	---	98.643	---	---	---	32.924	---	---	---
2020-09-01	12:46:35	16866.7	6blue	337.75	---	---	---	15.306	---	---	---	1021.16	28.828	15.306	---	---	21.159	---	---	---	98.608	---	---	---	32.709	---	---	---
2020-09-01	12:46:36	16867.7	6blue	337.71	---	---	---	15.305	---	---	---	1021.18	28.68	15.305	---	---	21.16	---	---	---	98.596	---	---	---	32.756	---	---	---
2020-09-01	12:46:37	16868.7	6blue	337.7	---	---	---	15.304	---	---	---	1021.2	28.599	15.304	---	---	21.161	---	---	---	98.572	---	---	---	32.86	---	---	---
2020-09-01	12:46:38	16869.7	6blue	337.97	---	---	---	15.303	---	---	---	1021.21	28.586	15.303	---	---	21.152	---	---	---	98.586	---	---	---	33.069	---	---	---
2020-09-01	12:46:39	16870.7	6blue	338.06	---	---	---	15.301	---	---	---	1021.21	28.548	15.301	---	---	21.15	---	---	---	98.598	---	---	---	33.148	---	---	---
2020-09-01	12:46:40	16871.7	6blue	338.18	---	---	---	15.301	---	---	---	1021.16	28.482	15.301	---	---	21.146	---	---	---	98.59	---	---	---	33.089	---	---	---
2020-09-01	12:46:41	16872.7	6blue	338.06	---	---	---	15.301	---	---	---	1021.16	28.428	15.301	---	---	21.15	---	---	---	98.599	---	---	---	33.101	---	---	---
2020-09-01	15:19:18	26030.2	6blue	291.06	---	---	---	15.269	---	---	---	1021.1	38.431	15.269	---	---	22.922	---	---	---	111.158	---	---	---	63.025	---	---	---
2020-09-01	15:19:19	26031.2	6blue	311.03	---	---	---	15.272	---	---	---	1020.99	37.922	15.272	---	---	22.158	---	---	---	106.777	---	---	---	46.826	---	---	---
2020-09-01	15:19:20	26032.2	6blue	330.92	---	---	---	15.275	---	---	---	1020.93	37.38	15.275	---	---	21.398	---	---	---	102.416	---	---	---	31.011	---	---	---
2020-09-01	15:19:21	26033.2	6blue	330.89	---	---	---	15.279	---	---	---	1020.92	37.279	15.279	---	---	21.398	---	---	---	102.403	---	---	---	30.508	---	---	---
2020-09-01	15:19:22	26034.2	6blue	331.14	---	---	---	15.278	---	---	---	1020.92	37.177	15.278	---	---	21.39	---	---	---	102.419	---	---	---	30.686	---	---	---
2020-09-01	15:19:23	26035.2	6blue	331.1	---	---	---	15.281	---	---	---	1020.89	37.121	15.281	---	---	21.39	---	---	---	102.391	---	---	---	30.525	---	---	---
2020-09-01	15:19:24	26036.2	6blue	331	---	---	---	15.281	---	---	---	1020.86	37.088	15.281	---	---	21.393	---	---	---	102.38	---	---	---	30.925	---	---	---
2020-09-01	15:19:25	26037.2	6blue	330.79	---	---	---	15.283	---	---	---	1020.87	37.067	15.283	---	---	21.4	---	---	---	102.367	---	---	---	30.908	---	---	---
2020-09-01	15:19:26	26038.2	6blue	330.83	---	---	---	15.283	---	---	---	1020.92	37.034	15.283	---	---	21.398	---	---	---	102.373	---	---	---	31.204	---	---	---
2020-09-01	15:19:27	26039.2	6blue	330.87	---	---	---	15.282	---	---	---	1020.95	37.001	15.282	---	---	21.397	---	---	---	102.36	---	---	---	30.879	---	---	---
2020-09-01	15:19:28	26040.2	6blue	331.21	---	---	---	15.282	---	---	---	1020.94	36.978	15.282	---	---	21.386	---	---	---	102.352	---	---	---	30.9	---	---	---
2020-09-01	15:19:29	26041.2	6blue	331.18	---	---	---	15.28	---	---	---	1020.94	36.978	15.28	---	---	21.388	---	---	---	102.332	---	---	---	30.839	---	---	---
2020-09-01	15:19:30	26042.2	6blue	331.12	---	---	---	15.279	---	---	---	1020.92	37.001	15.279	---	---	21.39	---	---	---	102.343	---	---	---	31.126	---	---	---
2020-09-01	15:19:31	26043.2	6blue	330.85	---	---	---	15.279	---	---	---	1020.94	37.024	15.279	---	---	21.399	---	---	---	102.315	---	---	---	31.212	---	---	---
2020-09-01	10:48:03	9754.51	6green	303.31	---	---	---	18.683	---	---	---	1021.65	43.12	18.683	---	---	21.175	---	---	---	107.136	---	---	---	37.199	---	---	---
2020-09-01	10:48:04	9755.51	6green	316.42	---	---	---	17.029	---	---	---	1021.71	44.766	17.029	---	---	21.292	---	---	---	108.146	---	---	---	27.413	---	---	---
2020-09-01	10:48:05	9756.51	6green	329.36	---	---	---	15.381	---	---	---	1021.81	46.388	15.381	---	---	21.412	---	---	---	109.152	---	---	---	17.842	---	---	---
2020-09-01	10:48:06	9757.51	6green	329.06	---	---	---	15.386	---	---	---	1021.79	46.421	15.386	---	---	21.42	---	---	---	109.2	---	---	---	17.901	---	---	---
2020-09-01	10:48:07	9758.51	6green	328.88	---	---	---	15.392	---	---	---	1021.79	46.467	15.392	---	---	21.424	---	---	---	109.23	---	---	---	17.936	---	---	---
2020-09-01	10:48:08	9759.51	6green	328.93	---	---	---	15.391	---	---	---	1021.75	46.523	15.391	---	---	21.423	---	---	---	109.247	---	---	---	17.939	---	---	---
2020-09-01	10:48:09	9760.51	6green	329.05	---	---	---	15.39	---	---	---	1021.75	46.599	15.39	---	---	21.419	---	---	---	109.252	---	---	---	17.683	---	---	---
2020-09-01	10:48:10	9761.51	6green	329.18	---	---	---	15.39	---	---	---	1021.77	46.686	15.39	---	---	21.414	---	---	---	109.259	---	---	---	17.65	---	---	---
2020-09-01	10:48:11	9762.51	6green	329.21	---	---	---	15.389	---	---	---	1021.8	46.785	15.389	---	---	21.414	---	---	---	109.279	---	---	---	17.665	---	---	---
2020-09-01	10:48:12	9763.51	6green	329	---	---	---	15.39	---	---	---	1021.78	46.864	15.39	---	---	21.421	---	---	---	109.293	---	---	---	17.749	---	---	---
2020-09-01	10:48:13	9764.51	6green	329.16	---	---	---	15.388	---	---	---	1021.75	46.92	15.388	---	---	21.416	---	---	---	109.302	---	---	---	17.765	---	---	---
2020-09-01	10:48:14	9765.51	6green	329.21	---	---	---	15.387	---	---	---	1021.73	46.963	15.387	---	---	21.414	---	---	---	109.331	---	---	---	17.872	---	---	---
2020-09-01	10:48:15	9766.51	6green	329.35	---	---	---	15.389	---	---	---	1021.76	46.983	15.389	---	---	21.409	---	---	---	109.348	---	---	---	17.94	---	---	---
2020-09-01	10:48:16	9767.51	6green	329.18	---	---	---	15.392	---	---	---	1021.76	46.993	15.392	---	---	21.414	---	---	---	109.389	---	---	---	18.093	---	---	---
2020-09-01	10:48:17	9768.51	6green	329.08	---	---	---	15.398	---	---	---	1021.76	47.006	15.398	---	---	21.415	---	---	---	109.401	---	---	---	18.068	---	---	---
2020-09-01	10:48:18	9769.51	6green	328.95	---	---	---	15.403	---	---	---	1021.75	47.008	15.403	---	---	21.418	---	---	---	109.408	---	---	---	18.031	---	---	---
2020-09-01	10:48:19	9770.51	6green	329.04	---	---	---	15.405	---	---	---	1021.77	47.001	15.405	---	---	21.414	---	---	---	109.398	---	---	---	17.848	---	---	---
2020-09-01	10:48:20	9771.51	6green	329.14	---	---	---	15.406	---	---	---	1021.78	46.978	15.406	---	---	21.41	---	---	---	109.41	---	---	---	17.814	---	---	---
2020-09-01	10:48:21	9772.51	6green	329.25	---	---	---	15.404	---	---	---	1021.77	46.945	15.404	---	---	21.407	---	---	---	109.418	---	---	---	17.767	---	---	---
2020-09-01	12:39:44	16455.7	6green	278.25	---	---	---	18.702	---	---	---	1021.23	34.059	18.702	---	---	22.187	---	---	---	110.058	---	---	---	36.634	---	---	---
2020-09-01	12:39:45	16456.7	6green	300.89	---	---	---	16.999	---	---	---	1021.19	33.054	16.999	---	---	21.915	---	---	---	107.803	---	---	---	47.642	---	---	---
2020-09-01	12:39:46	16457.7	6green	323.5	---	---	---	15.294	---	---	---	1021.17	32.05	15.294	---	---	21.645	---	---	---	105.528	---	---	---	58.606	---	---	---
2020-09-01	12:39:47	16458.7	6green	323.23	---	---	---	15.297	---	---	---	1021.1	32.05	15.297	---	---	21.653	---	---	---	105.524	---	---	---	58.573	---	---	---
2020-09-01	12:39:48	16459.7	6green	323.15	---	---	---	15.3	---	---	---	1021.08	32.116	15.3	---	---	21.655	---	---	---	105.521	---	---	---	58.522	---	---	---
2020-09-01	12:39:49	16460.7	6green	323.27	---	---	---	15.303	---	---	---	1021.1	32.195	15.303	---	---	21.65	---	---	---	105.535	---	---	---	58.493	---	---	---
2020-09-01	12:39:50	16461.7	6green	323.25	---	---	---	15.305	---	---	---	1021.11	32.264	15.305	---	---	21.65	---	---	---	105.534	---	---	---	58.46	---	---	---
2020-09-01	12:39:51	16462.7	6green	323.39	---	---	---	15.304	---	---	---	1021.13	32.304	15.304	---	---	21.645	---	---	---	105.519	---	---	---	58.361	---	---	---
2020-09-01	12:39:52	16463.7	6green	323.27	---	---	---	15.305	---	---	---	1021.08	32.332	15.305	---	---	21.649	---	---	---	105.505	---	---	---	58.227	---	---	---
2020-09-01	12:39:53	16464.7	6green	323.4	---	---	---	15.304	---	---	---	1021.09	32.345	15.304	---	---	21.645	---	---	---	105.484	---	---	---	57.824	---	---	---
2020-09-01	12:39:54	16465.7	6green	323.47	---	---	---	15.305	---	---	---	1021.08	32.37	15.305	---	---	21.642	---	---	---	105.478	---	---	---	57.588	---	---	---
2020-09-01	12:39:55	16466.7	6green	323.65	---	---	---	15.303	---	---	---	1021.09	32.411	15.303	---	---	21.636	---	---	---	105.469	---	---	---	57.437	---	---	---
2020-09-01	15:14:06	25718.1	6green	247.6	---	---	---	18.696	---	---	---	1021.2	37.375	18.696	---	---	23.683	---	---	---	114.274	---	---	---	36.986	---	---	---
2020-09-01	15:14:07	25719.1	6green	282.7	---	---	---	16.986	---	---	---	1021.18	38.291	16.986	---	---	22.763	---	---	---	109.675	---	---	---	48.989	---	---	---
2020-09-01	15:14:08	25720.1	6green	317.56	---	---	---	15.277	---	---	---	1021.16	39.237	15.277	---	---	21.86	---	---	---	105.194	---	---	---	61.975	---	---	---
2020-09-01	15:14:09	25721.1	6green	317.46	---	---	---	15.282	---	---	---	1021.12	39.247	15.282	---	---	21.862	---	---	---	105.17	---	---	---	57.585	---	---	---
2020-09-01	15:14:10	25722.1	6green	317.59	---	---	---	15.284	---	---	---	1021.15	39.27	15.284	---	---	21.857	---	---	---	105.201	---	---	---	58.427	---	---	---
2020-09-01	15:14:11	25723.1	6green	317.28	---	---	---	15.289	---	---	---	1021.16	39.27	15.289	---	---	21.866	---	---	---	105.217	---	---	---	58.293	---	---	---
2020-09-01	15:14:12	25724.1	6green	317.57	---	---	---	15.287	---	---	---	1021.17	39.249	15.287	---	---	21.856	---	---	---	105.217	---	---	---	58.427	---	---	---
2020-09-01	15:14:13	25725.1	6green	317.5	---	---	---	15.289	---	---	---	1021.13	39.193	15.289	---	---	21.858	---	---	---	105.201	---	---	---	56.958	---	---	---
2020-09-01	15:14:14	25726.1	6green	317.72	---	---	---	15.288	---	---	---	1021.13	39.15	15.288	---	---	21.851	---	---	---	105.203	---	---	---	53.507	---	---	---
2020-09-01	15:14:15	25727.1	6green	317.73	---	---	---	15.288	---	---	---	1021.12	39.117	15.288	---	---	21.85	---	---	---	105.2	---	---	---	53.879	---	---	---
2020-09-01	15:14:16	25728.1	6green	317.99	---	---	---	15.286	---	---	---	1021.14	39.094	15.286	---	---	21.842	---	---	---	105.19	---	---	---	53.68	---	---	---
2020-09-01	15:14:17	25729.1	6green	317.93	---	---	---	15.283	---	---	---	1021.14	39.092	15.283	---	---	21.845	---	---	---	105.158	---	---	---	57.027	---	---	---
2020-09-01	15:14:18	25730.1	6green	318	---	---	---	15.282	---	---	---	1021.18	39.11	15.282	---	---	21.843	---	---	---	105.146	---	---	---	56.697	---	---	---
2020-09-01	15:14:19	25731.1	6green	317.93	---	---	---	15.281	---	---	---	1021.21	39.132	15.281	---	---	21.846	---	---	---	105.143	---	---	---	58.114	---	---	---
2020-09-01	15:14:20	25732.1	6green	318.26	---	---	---	15.282	---	---	---	1021.23	39.145	15.282	---	---	21.834	---	---	---	105.158	---	---	---	58.191	---	---	---
2020-09-01	10:48:58	9810.47	6orange	330.58	---	---	---	15.406	---	---	---	1021.79	47.049	15.406	---	---	21.361	---	---	---	109.303	---	---	---	22.954	---	---	---
2020-09-01	10:48:59	9811.47	6orange	332.08	---	---	---	15.411	---	---	---	1021.74	47.166	15.411	---	---	21.309	---	---	---	109.159	---	---	---	29.082	---	---	---
2020-09-01	10:49:00	9812.47	6orange	333.54	---	---	---	15.418	---	---	---	1021.75	47.337	15.418	---	---	21.257	---	---	---	109.043	---	---	---	37.265	---	---	---
2020-09-01	10:49:01	9813.47	6orange	333.62	---	---	---	15.425	---	---	---	1021.72	47.403	15.425	---	---	21.251	---	---	---	109.04	---	---	---	39.621	---	---	---
2020-09-01	10:49:02	9814.47	6orange	333.45	---	---	---	15.43	---	---	---	1021.77	47.469	15.43	---	---	21.255	---	---	---	109.044	---	---	---	42.067	---	---	---
2020-09-01	10:49:03	9815.47	6orange	332.35	---	---	---	15.437	---	---	---	1021.74	47.502	15.437	---	---	21.29	---	---	---	109.279	---	---	---	51.174	---	---	---
2020-09-01	10:49:04	9816.47	6orange	332.25	---	---	---	15.44	---	---	---	1021.75	47.512	15.44	---	---	21.291	---	---	---	109.253	---	---	---	50.001	---	---	---
2020-09-01	10:49:05	9817.47	6orange	332.44	---	---	---	15.45	---	---	---	1021.7	47.502	15.45	---	---	21.282	---	---	---	109.231	---	---	---	48.528	---	---	---
2020-09-01	10:49:06	9818.47	6orange	333.21	---	---	---	15.465	---	---	---	1021.71	47.492	15.465	---	---	21.25	---	---	---	108.983	---	---	---	37.248	---	---	---
2020-09-01	10:49:07	9819.47	6orange	333.09	---	---	---	15.48	---	---	---	1021.69	47.459	15.48	---	---	21.248	---	---	---	108.979	---	---	---	36.597	---	---	---
2020-09-01	10:49:08	9820.47	6orange	333.3	---	---	---	15.488	---	---	---	1021.71	47.403	15.488	---	---	21.239	---	---	---	108.932	---	---	---	35.854	---	---	---
2020-09-01	10:49:09	9821.47	6orange	333.48	---	---	---	15.481	---	---	---	1021.75	47.324	15.481	---	---	21.235	---	---	---	108.905	---	---	---	36.398	---	---	---
2020-09-01	10:49:10	9822.47	6orange	333.49	---	---	---	15.475	---	---	---	1021.73	47.268	15.475	---	---	21.237	---	---	---	108.903	---	---	---	35.913	---	---	---
2020-09-01	10:49:11	9823.47	6orange	333.22	---	---	---	15.468	---	---	---	1021.69	47.258	15.468	---	---	21.249	---	---	---	108.963	---	---	---	37.081	---	---	---
2020-09-01	10:49:12	9824.47	6orange	333.36	---	---	---	15.466	---	---	---	1021.67	47.26	15.466	---	---	21.245	---	---	---	108.977	---	---	---	37.272	---	---	---
2020-09-01	10:49:13	9825.47	6orange	333.71	---	---	---	15.464	---	---	---	1021.72	47.23	15.464	---	---	21.234	---	---	---	109.013	---	---	---	39.417	---	---	---
2020-09-01	12:40:38	16510	6orange	329.21	---	---	---	15.299	---	---	---	1021.14	32.269	15.299	---	---	21.451	---	---	---	104.262	---	---	---	53.353	---	---	---
2020-09-01	12:40:39	16511	6orange	334.39	---	---	---	15.296	---	---	---	1021.17	32.101	15.296	---	---	21.277	---	---	---	103.057	---	---	---	49.261	---	---	---
2020-09-01	12:40:40	16512	6orange	339.52	---	---	---	15.296	---	---	---	1021.21	31.918	15.296	---	---	21.104	---	---	---	101.844	---	---	---	45.157	---	---	---
2020-09-01	12:40:41	16513	6orange	339.41	---	---	---	15.298	---	---	---	1021.21	31.933	15.298	---	---	21.107	---	---	---	101.838	---	---	---	45.176	---	---	---
2020-09-01	12:40:42	16514	6orange	339.36	---	---	---	15.302	---	---	---	1021.21	31.961	15.302	---	---	21.107	---	---	---	101.832	---	---	---	45.39	---	---	---
2020-09-01	12:40:43	16515	6orange	339.42	---	---	---	15.302	---	---	---	1021.21	31.981	15.302	---	---	21.105	---	---	---	101.818	---	---	---	45.545	---	---	---
2020-09-01	12:40:44	16516	6orange	339.18	---	---	---	15.303	---	---	---	1021.17	31.974	15.303	---	---	21.112	---	---	---	101.814	---	---	---	45.731	---	---	---
2020-09-01	12:40:45	16517	6orange	339.26	---	---	---	15.3	---	---	---	1021.14	31.938	15.3	---	---	21.111	---	---	---	101.801	---	---	---	45.684	---	---	---
2020-09-01	12:40:46	16518	6orange	339.37	---	---	---	15.3	---	---	---	1021.12	31.803	15.3	---	---	21.107	---	---	---	101.794	---	---	---	45.699	---	---	---
2020-09-01	12:40:47	16519	6orange	339.66	---	---	---	15.3	---	---	---	1021.1	31.562	15.3	---	---	21.098	---	---	---	101.777	---	---	---	45.706	---	---	---
2020-09-01	12:40:48	16520	6orange	339.62	---	---	---	15.302	---	---	---	1021.1	31.31	15.302	---	---	21.099	---	---	---	101.774	---	---	---	45.714	---	---	---
2020-09-01	12:40:49	16521	6orange	339.52	---	---	---	15.303	---	---	---	1021.11	31.15	15.303	---	---	21.101	---	---	---	101.753	---	---	---	45.681	---	---	---
2020-09-01	12:40:50	16522	6orange	339.3	---	---	---	15.3	---	---	---	1021.1	31.109	15.3	---	---	21.11	---	---	---	101.757	---	---	---	45.635	---	---	---
2020-09-01	12:40:51	16523	6orange	339.16	---	---	---	15.301	---	---	---	1021.12	31.122	15.301	---	---	21.114	---	---	---	101.739	---	---	---	45.701	---	---	---
2020-09-01	12:40:52	16524	6orange	338.94	---	---	---	15.299	---	---	---	1021.08	31.175	15.299	---	---	21.122	---	---	---	101.76	---	---	---	45.745	---	---	---
2020-09-01	12:40:53	16525	6orange	338.6	---	---	---	15.302	---	---	---	1021.07	31.203	15.302	---	---	21.132	---	---	---	101.748	---	---	---	45.955	---	---	---
2020-09-01	12:40:54	16526	6orange	338.49	---	---	---	15.302	---	---	---	1021.05	31.203	15.302	---	---	21.135	---	---	---	101.733	---	---	---	46.156	---	---	---
2020-09-01	15:15:03	25775.1	6orange	325.45	---	---	---	15.274	---	---	---	1021.19	39.234	15.274	---	---	21.592	---	---	---	103.782	---	---	---	53.083	---	---	---
2020-09-01	15:15:04	25776.1	6orange	332.56	---	---	---	15.266	---	---	---	1021.16	39.321	15.266	---	---	21.353	---	---	---	102.429	---	---	---	47.337	---	---	---
2020-09-01	15:15:05	25777.1	6orange	339.57	---	---	---	15.258	---	---	---	1021.13	39.407	15.258	---	---	21.117	---	---	---	101.055	---	---	---	41.065	---	---	---
2020-09-01	15:15:06	25778.1	6orange	339.33	---	---	---	15.258	---	---	---	1021.14	39.402	15.258	---	---	21.125	---	---	---	101.119	---	---	---	40.349	---	---	---
2020-09-01	15:15:07	25779.1	6orange	339.45	---	---	---	15.259	---	---	---	1021.16	39.387	15.259	---	---	21.12	---	---	---	101.1	---	---	---	42.279	---	---	---
2020-09-01	15:15:08	25780.1	6orange	339.53	---	---	---	15.26	---	---	---	1021.17	39.349	15.26	---	---	21.117	---	---	---	101.097	---	---	---	45.201	---	---	---
2020-09-01	15:15:09	25781.1	6orange	339.65	---	---	---	15.263	---	---	---	1021.12	39.328	15.263	---	---	21.112	---	---	---	101.07	---	---	---	47.185	---	---	---
2020-09-01	15:15:10	25782.1	6orange	339.33	---	---	---	15.267	---	---	---	1021.09	39.339	15.267	---	---	21.121	---	---	---	101.096	---	---	---	45.177	---	---	---
2020-09-01	15:15:11	25783.1	6orange	339.45	---	---	---	15.267	---	---	---	1021.08	39.384	15.267	---	---	21.117	---	---	---	101.07	---	---	---	43.966	---	---	---
2020-09-01	15:15:12	25784.1	6orange	339.82	---	---	---	15.267	---	---	---	1021.12	39.438	15.267	---	---	21.105	---	---	---	100.996	---	---	---	42.485	---	---	---
2020-09-01	15:15:13	25785.1	6orange	340.2	---	---	---	15.265	---	---	---	1021.13	39.481	15.265	---	---	21.093	---	---	---	100.949	---	---	---	43.703	---	---	---
2020-09-01	10:50:09	9881.4	6red	333.27	---	---	---	15.463	---	---	---	1021.77	47.883	15.463	---	---	21.249	---	---	---	109.283	---	---	---	41.886	---	---	---
2020-09-01	10:50:10	9882.4	6red	332.65	---	---	---	15.467	---	---	---	1021.74	48.527	15.467	---	---	21.268	---	---	---	109.558	---	---	---	44.486	---	---	---
2020-09-01	10:50:11	9883.4	6red	331.76	---	---	---	15.468	---	---	---	1021.76	49.203	15.468	---	---	21.298	---	---	---	109.848	---	---	---	46.487	---	---	---
2020-09-01	10:50:12	9884.4	6red	331.29	---	---	---	15.472	---	---	---	1021.77	49.17	15.472	---	---	21.312	---	---	---	109.923	---	---	---	45.988	---	---	---
2020-09-01	10:50:13	9885.4	6red	330.86	---	---	---	15.47	---	---	---	1021.8	49.18	15.47	---	---	21.328	---	---	---	109.975	---	---	---	46.528	---	---	---
2020-09-01	10:50:14	9886.4	6red	330.79	---	---	---	15.472	---	---	---	1021.76	49.213	15.472	---	---	21.329	---	---	---	110.015	---	---	---	46.652	---	---	---
2020-09-01	10:50:15	9887.4	6red	330.79	---	---	---	15.476	---	---	---	1021.76	49.292	15.476	---	---	21.328	---	---	---	110.02	---	---	---	46.771	---	---	---
2020-09-01	10:50:16	9888.4	6red	331.2	---	---	---	15.479	---	---	---	1021.8	49.358	15.479	---	---	21.313	---	---	---	110.037	---	---	---	46.438	---	---	---
2020-09-01	10:50:17	9889.4	6red	331.13	---	---	---	15.484	---	---	---	1021.81	49.424	15.484	---	---	21.313	---	---	---	110.025	---	---	---	46.169	---	---	---
2020-09-01	10:50:18	9890.4	6red	331.36	---	---	---	15.484	---	---	---	1021.76	49.457	15.484	---	---	21.305	---	---	---	110.018	---	---	---	45.749	---	---	---
2020-09-01	10:50:19	9891.4	6red	331.27	---	---	---	15.489	---	---	---	1021.72	49.48	15.489	---	---	21.307	---	---	---	110	---	---	---	46.117	---	---	---
2020-09-01	10:50:20	9892.4	6red	331.4	---	---	---	15.491	---	---	---	1021.7	49.49	15.491	---	---	21.302	---	---	---	110.008	---	---	---	46.22	---	---	---
2020-09-01	10:50:21	9893.4	6red	331.28	---	---	---	15.493	---	---	---	1021.73	49.511	15.493	---	---	21.305	---	---	---	110.003	---	---	---	45.989	---	---	---
2020-09-01	10:50:22	9894.4	6red	331.11	---	---	---	15.492	---	---	---	1021.71	49.544	15.492	---	---	21.311	---	---	---	110.033	---	---	---	45.641	---	---	---
2020-09-01	12:41:36	16567.9	6red	326.45	---	---	---	15.3	---	---	---	1021.08	31.155	15.3	---	---	21.56	---	---	---	104.001	---	---	---	45.351	---	---	---
2020-09-01	12:41:37	16568.9	6red	314.72	---	---	---	15.296	---	---	---	1021.09	31.119	15.296	---	---	21.975	---	---	---	106.271	---	---	---	44.348	---	---	---
2020-09-01	12:41:38	16569.9	6red	302.71	---	---	---	15.296	---	---	---	1021.1	31.056	15.296	---	---	22.398	---	---	---	108.538	---	---	---	43.245	---	---	---
2020-09-01	12:41:39	16570.9	6red	302.73	---	---	---	15.297	---	---	---	1021.11	31.015	15.297	---	---	22.397	---	---	---	108.505	---	---	---	43.211	---	---	---
2020-09-01	12:41:40	16571.9	6red	302.8	---	---	---	15.298	---	---	---	1021.14	31.002	15.298	---	---	22.394	---	---	---	108.482	---	---	---	43.172	---	---	---
2020-09-01	12:41:41	16572.9	6red	302.83	---	---	---	15.298	---	---	---	1021.13	30.923	15.298	---	---	22.393	---	---	---	108.49	---	---	---	43.163	---	---	---
2020-09-01	12:41:42	16573.9	6red	302.81	---	---	---	15.3	---	---	---	1021.14	30.778	15.3	---	---	22.393	---	---	---	108.48	---	---	---	43.064	---	---	---
2020-09-01	12:41:43	16574.9	6red	302.9	---	---	---	15.3	---	---	---	1021.13	30.59	15.3	---	---	22.389	---	---	---	108.464	---	---	---	43.067	---	---	---
2020-09-01	12:41:44	16575.9	6red	302.98	---	---	---	15.297	---	---	---	1021.11	30.509	15.297	---	---	22.387	---	---	---	108.429	---	---	---	43.046	---	---	---
2020-09-01	12:41:45	16576.9	6red	303.13	---	---	---	15.295	---	---	---	1021.07	30.521	15.295	---	---	22.383	---	---	---	108.4	---	---	---	43.164	---	---	---
2020-09-01	12:41:46	16577.9	6red	302.95	---	---	---	15.294	---	---	---	1021.07	30.554	15.294	---	---	22.39	---	---	---	108.389	---	---	---	43.23	---	---	---
2020-09-01	12:41:47	16578.9	6red	302.92	---	---	---	15.293	---	---	---	1021.12	30.521	15.293	---	---	22.391	---	---	---	108.36	---	---	---	43.314	---	---	---
2020-09-01	12:41:48	16579.9	6red	302.74	---	---	---	15.292	---	---	---	1021.17	30.46	15.292	---	---	22.398	---	---	---	108.365	---	---	---	43.332	---	---	---
2020-09-01	15:16:00	25831.9	6red	321.19	---	---	---	15.268	---	---	---	1021.14	39.343	15.268	---	---	21.788	---	---	---	104.849	---	---	---	53.896	---	---	---
2020-09-01	15:16:01	25832.9	6red	300.76	---	---	---	15.27	---	---	---	1021.1	39.196	15.27	---	---	22.539	---	---	---	109.073	---	---	---	68.445	---	---	---
2020-09-01	15:16:02	25833.9	6red	279.81	---	---	---	15.271	---	---	---	1021.09	39.049	15.271	---	---	23.314	---	---	---	113.462	---	---	---	78.479	---	---	---
2020-09-01	15:16:03	25834.9	6red	277.24	---	---	---	15.271	---	---	---	1021.09	39.072	15.271	---	---	23.421	---	---	---	114.113	---	---	---	79.062	---	---	---
2020-09-01	15:16:04	25835.9	6red	275.33	---	---	---	15.271	---	---	---	1021.14	39.072	15.271	---	---	23.502	---	---	---	114.569	---	---	---	76.874	---	---	---
2020-09-01	15:16:05	25836.9	6red	273.98	---	---	---	15.272	---	---	---	1021.16	39.072	15.272	---	---	23.559	---	---	---	114.906	---	---	---	78.119	---	---	---
2020-09-01	15:16:06	25837.9	6red	273.1	---	---	---	15.275	---	---	---	1021.15	39.049	15.275	---	---	23.595	---	---	---	115.105	---	---	---	77.167	---	---	---
2020-09-01	15:16:07	25838.9	6red	272.68	---	---	---	15.276	---	---	---	1021.12	39.038	15.276	---	---	23.613	---	---	---	115.258	---	---	---	77.328	---	---	---
2020-09-01	15:16:08	25839.9	6red	272.37	---	---	---	15.276	---	---	---	1021.11	39.015	15.276	---	---	23.626	---	---	---	115.34	---	---	---	76.765	---	---	---
2020-09-01	15:16:09	25840.9	6red	271.92	---	---	---	15.271	---	---	---	1021.12	38.993	15.271	---	---	23.647	---	---	---	115.395	---	---	---	78.239	---	---	---
2020-09-01	15:16:10	25841.9	6red	271.67	---	---	---	15.269	---	---	---	1021.15	38.97	15.269	---	---	23.659	---	---	---	115.424	---	---	---	78.252	---	---	---
2020-09-01	15:16:11	25842.9	6red	271.35	---	---	---	15.268	---	---	---	1021.13	38.96	15.268	---	---	23.673	---	---	---	115.431	---	---	---	79.251	---	---	---
2020-09-01	15:16:12	25843.9	6red	271.47	---	---	---	15.267	---	---	---	1021.12	38.96	15.267	---	---	23.668	---	---	---	115.49	---	---	---	78.425	---	---	---
2020-09-01	15:16:13	25844.9	6red	271.48	---	---	---	15.268	---	---	---	1021.11	38.96	15.268	---	---	23.667	---	---	---	115.516	---	---	---	77.508	---	---	---
2020-09-01	15:16:14	25845.9	6red	271.32	---	---	---	15.266	---	---	---	1021.15	38.95	15.266	---	---	23.675	---	---	---	115.555	---	---	---	77.26	---	---	---
2020-09-01	15:16:15	25846.9	6red	271.23	---	---	---	15.268	---	---	---	1021.16	38.927	15.268	---	---	23.678	---	---	---	115.54	---	---	---	77.759	---	---	---
2020-09-01	10:54:39	10151.4	6white	328.09	---	---	---	15.428	---	---	---	1021.74	49.13	15.428	---	---	21.437	---	---	---	112.18	---	---	---	48.234	---	---	---
2020-09-01	10:54:40	10152.4	6white	328.12	---	---	---	15.432	---	---	---	1021.75	49.152	15.432	---	---	21.435	---	---	---	112.226	---	---	---	39.929	---	---	---
2020-09-01	10:54:41	10153.4	6white	328.06	---	---	---	15.433	---	---	---	1021.74	49.162	15.433	---	---	21.437	---	---	---	112.301	---	---	---	31.656	---	---	---
2020-09-01	10:54:42	10154.4	6white	327.81	---	---	---	15.438	---	---	---	1021.72	49.142	15.438	---	---	21.443	---	---	---	112.299	---	---	---	31.643	---	---	---
2020-09-01	10:54:43	10155.4	6white	327.71	---	---	---	15.442	---	---	---	1021.67	49.132	15.442	---	---	21.445	---	---	---	112.323	---	---	---	31.747	---	---	---
2020-09-01	10:54:44	10156.4	6white	327.59	---	---	---	15.448	---	---	---	1021.64	49.122	15.448	---	---	21.447	---	---	---	112.33	---	---	---	31.787	---	---	---
2020-09-01	10:54:45	10157.4	6white	327.59	---	---	---	15.447	---	---	---	1021.67	49.109	15.447	---	---	21.447	---	---	---	112.33	---	---	---	31.703	---	---	---
2020-09-01	10:54:46	10158.4	6white	327.64	---	---	---	15.449	---	---	---	1021.69	49.086	15.449	---	---	21.445	---	---	---	112.321	---	---	---	31.644	---	---	---
2020-09-01	10:54:47	10159.4	6white	327.6	---	---	---	15.452	---	---	---	1021.7	49.053	15.452	---	---	21.445	---	---	---	112.313	---	---	---	31.592	---	---	---
2020-09-01	10:54:48	10160.4	6white	327.79	---	---	---	15.457	---	---	---	1021.66	49.02	15.457	---	---	21.437	---	---	---	112.312	---	---	---	31.668	---	---	---
2020-09-01	10:54:50	10161.6	6white	327.84	---	---	---	15.459	---	---	---	1021.68	48.998	15.459	---	---	21.434	---	---	---	112.311	---	---	---	31.639	---	---	---
2020-09-01	10:54:50	10162.4	6white	327.89	---	---	---	15.463	---	---	---	1021.69	48.985	15.463	---	---	21.431	---	---	---	112.334	---	---	---	31.65	---	---	---
2020-09-01	12:44:16	16728.4	6white	304.49	---	---	---	15.294	---	---	---	1021.23	30.232	15.294	---	---	22.332	---	---	---	107.195	---	---	---	52.492	---	---	---
2020-09-01	12:44:17	16729.4	6white	306.18	---	---	---	15.297	---	---	---	1021.25	30.056	15.297	---	---	22.268	---	---	---	106.017	---	---	---	64.25	---	---	---
2020-09-01	12:44:18	16730.4	6white	307.95	---	---	---	15.301	---	---	---	1021.26	29.881	15.301	---	---	22.2	---	---	---	104.843	---	---	---	74.543	---	---	---
2020-09-01	12:44:19	16731.4	6white	308.01	---	---	---	15.304	---	---	---	1021.21	29.881	15.304	---	---	22.197	---	---	---	104.836	---	---	---	73.495	---	---	---
2020-09-01	12:44:20	16732.4	6white	308.12	---	---	---	15.308	---	---	---	1021.19	29.894	15.308	---	---	22.192	---	---	---	104.835	---	---	---	72.351	---	---	---
2020-09-01	12:44:21	16733.4	6white	308.29	---	---	---	15.309	---	---	---	1021.14	29.919	15.309	---	---	22.185	---	---	---	104.816	---	---	---	72.61	---	---	---
2020-09-01	12:44:22	16734.4	6white	308.24	---	---	---	15.307	---	---	---	1021.15	29.96	15.307	---	---	22.188	---	---	---	104.821	---	---	---	76.138	---	---	---
2020-09-01	12:44:23	16735.4	6white	308.46	---	---	---	15.308	---	---	---	1021.18	30	15.308	---	---	22.179	---	---	---	104.802	---	---	---	73.385	---	---	---
2020-09-01	12:44:24	16736.4	6white	308.4	---	---	---	15.307	---	---	---	1021.19	30.028	15.307	---	---	22.182	---	---	---	104.802	---	---	---	74.122	---	---	---
2020-09-01	12:44:25	16737.4	6white	308.6	---	---	---	15.31	---	---	---	1021.2	30.013	15.31	---	---	22.173	---	---	---	104.797	---	---	---	76.891	---	---	---
2020-09-01	12:44:26	16738.4	6white	308.58	---	---	---	15.309	---	---	---	1021.18	29.96	15.309	---	---	22.174	---	---	---	104.73	---	---	---	83.165	---	---	---
2020-09-01	12:44:27	16739.4	6white	308.48	---	---	---	15.312	---	---	---	1021.2	29.878	15.312	---	---	22.177	---	---	---	104.74	---	---	---	80.399	---	---	---
2020-09-01	12:44:28	16740.4	6white	308.46	---	---	---	15.308	---	---	---	1021.24	29.746	15.308	---	---	22.179	---	---	---	104.712	---	---	---	77.353	---	---	---
2020-09-01	12:44:29	16741.4	6white	308.44	---	---	---	15.309	---	---	---	1021.24	29.639	15.309	---	---	22.179	---	---	---	104.777	---	---	---	87.08	---	---	---
2020-09-01	12:44:30	16742.4	6white	308.65	---	---	---	15.309	---	---	---	1021.23	29.532	15.309	---	---	22.171	---	---	---	104.759	---	---	---	87.851	---	---	---
2020-09-01	12:44:31	16743.4	6white	308.32	---	---	---	15.312	---	---	---	1021.19	29.504	15.312	---	---	22.183	---	---	---	104.887	---	---	---	100.794	---	---	---
2020-09-01	12:44:32	16744.4	6white	308.53	---	---	---	15.309	---	---	---	1021.21	29.504	15.309	---	---	22.176	---	---	---	104.854	---	---	---	86.904	---	---	---
2020-09-01	15:22:30	26222	6white	276.42	---	---	---	15.278	---	---	---	1020.88	35.742	15.278	---	---	23.461	---	---	---	113.294	---	---	---	22.872	---	---	---
2020-09-01	15:22:31	26223	6white	283.08	---	---	---	15.279	---	---	---	1020.94	35.582	15.279	---	---	23.183	---	---	---	111.683	---	---	---	22.154	---	---	---
2020-09-01	15:22:32	26224	6white	289.63	---	---	---	15.278	---	---	---	1020.96	35.402	15.278	---	---	22.911	---	---	---	110.071	---	---	---	21.512	---	---	---
2020-09-01	15:22:33	26225	6white	289.46	---	---	---	15.282	---	---	---	1020.97	35.3	15.282	---	---	22.917	---	---	---	110.074	---	---	---	21.108	---	---	---
2020-09-01	15:22:34	26226	6white	289.45	---	---	---	15.282	---	---	---	1020.93	35.165	15.282	---	---	22.917	---	---	---	110.057	---	---	---	21.646	---	---	---
2020-09-01	15:22:35	26227	6white	289.3	---	---	---	15.285	---	---	---	1020.95	35.02	15.285	---	---	22.922	---	---	---	110.067	---	---	---	21.859	---	---	---
2020-09-01	15:22:36	26228	6white	289.17	---	---	---	15.287	---	---	---	1020.92	34.921	15.287	---	---	22.926	---	---	---	110.053	---	---	---	22.687	---	---	---
2020-09-01	15:22:37	26229	6white	289.2	---	---	---	15.289	---	---	---	1020.96	34.855	15.289	---	---	22.924	---	---	---	110.059	---	---	---	22.257	---	---	---
2020-09-01	15:22:38	26230	6white	289.08	---	---	---	15.289	---	---	---	1020.94	34.832	15.289	---	---	22.929	---	---	---	110.035	---	---	---	22.828	---	---	---
2020-09-01	15:22:39	26231	6white	289.09	---	---	---	15.289	---	---	---	1020.96	34.86	15.289	---	---	22.929	---	---	---	110.028	---	---	---	23.219	---	---	---
2020-09-01	15:22:40	26232	6white	288.8	---	---	---	15.287	---	---	---	1020.92	34.893	15.287	---	---	22.941	---	---	---	110.018	---	---	---	24.378	---	---	---
2020-09-01	15:22:41	26233	6white	288.91	---	---	---	15.287	---	---	---	1020.92	34.926	15.287	---	---	22.937	---	---	---	110.022	---	---	---	23.868	---	---	---
2020-09-01	15:22:42	26234	6white	288.61	---	---	---	15.287	---	---	---	1020.89	34.903	15.287	---	---	22.949	---	---	---	110.033	---	---	---	23.226	---	---	---
2020-09-01	15:22:43	26235	6white	288.52	---	---	---	15.289	---	---	---	1020.9	34.875	15.289	---	---	22.952	---	---	---	110.046	---	---	---	22.431	---	---	---
2020-09-01	15:22:44	26236	6white	288.5	---	---	---	15.288	---	---	---	1020.9	34.857	15.288	---	---	22.953	---	---	---	110.034	---	---	---	22.362	---	---	---
2020-09-01	10:53:34	10086.3	6yellow	332.21	---	---	---	15.402	---	---	---	1021.7	49.694	15.402	---	---	21.308	---	---	---	110.979	---	---	---	52.16	---	---	---
2020-09-01	10:53:35	10087.3	6yellow	330.14	---	---	---	15.408	---	---	---	1021.72	49.394	15.408	---	---	21.375	---	---	---	111.499	---	---	---	53.589	---	---	---
2020-09-01	10:53:36	10088.3	6yellow	327.98	---	---	---	15.413	---	---	---	1021.72	49.084	15.413	---	---	21.446	---	---	---	112.055	---	---	---	55.39	---	---	---
2020-09-01	10:53:37	10089.3	6yellow	327.96	---	---	---	15.415	---	---	---	1021.7	49.084	15.415	---	---	21.447	---	---	---	112.079	---	---	---	55.541	---	---	---
2020-09-01	10:53:38	10090.3	6yellow	327.84	---	---	---	15.415	---	---	---	1021.7	49.084	15.415	---	---	21.451	---	---	---	112.102	---	---	---	55.565	---	---	---
2020-09-01	10:53:39	10091.3	6yellow	327.92	---	---	---	15.418	---	---	---	1021.71	49.074	15.418	---	---	21.447	---	---	---	112.098	---	---	---	55.178	---	---	---
2020-09-01	10:53:40	10092.3	6yellow	327.72	---	---	---	15.419	---	---	---	1021.77	49.041	15.419	---	---	21.453	---	---	---	112.14	---	---	---	54.287	---	---	---
2020-09-01	10:53:41	10093.3	6yellow	327.23	---	---	---	15.422	---	---	---	1021.78	48.997	15.422	---	---	21.469	---	---	---	112.312	---	---	---	49.318	---	---	---
2020-09-01	10:53:42	10094.3	6yellow	326.09	---	---	---	15.421	---	---	---	1021.78	48.964	15.421	---	---	21.508	---	---	---	112.523	---	---	---	47.945	---	---	---
2020-09-01	10:53:43	10095.3	6yellow	325.48	---	---	---	15.422	---	---	---	1021.73	48.954	15.422	---	---	21.529	---	---	---	112.687	---	---	---	48.922	---	---	---
2020-09-01	10:53:44	10096.3	6yellow	325.52	---	---	---	15.423	---	---	---	1021.75	48.954	15.423	---	---	21.528	---	---	---	112.656	---	---	---	54.172	---	---	---
2020-09-01	10:53:45	10097.3	6yellow	326.24	---	---	---	15.424	---	---	---	1021.75	48.954	15.424	---	---	21.502	---	---	---	112.486	---	---	---	55.75	---	---	---
2020-09-01	10:53:46	10098.3	6yellow	327.08	---	---	---	15.426	---	---	---	1021.77	48.964	15.426	---	---	21.473	---	---	---	112.305	---	---	---	55.645	---	---	---
2020-09-01	10:53:47	10099.3	6yellow	327.37	---	---	---	15.427	---	---	---	1021.76	48.987	15.427	---	---	21.462	---	---	---	112.181	---	---	---	55.439	---	---	---
2020-09-01	10:53:48	10100.3	6yellow	327.67	---	---	---	15.429	---	---	---	1021.74	49.01	15.429	---	---	21.451	---	---	---	112.149	---	---	---	55.659	---	---	---
2020-09-01	10:53:49	10101.3	6yellow	327.62	---	---	---	15.431	---	---	---	1021.74	49.023	15.431	---	---	21.452	---	---	---	112.141	---	---	---	55.87	---	---	---
2020-09-01	10:53:50	10102.3	6yellow	327.9	---	---	---	15.432	---	---	---	1021.73	49.033	15.432	---	---	21.442	---	---	---	112.13	---	---	---	57.038	---	---	---
2020-09-01	10:53:51	10103.3	6yellow	328.12	---	---	---	15.432	---	---	---	1021.74	49.053	15.432	---	---	21.435	---	---	---	112.158	---	---	---	57.166	---	---	---
2020-09-01	10:53:52	10104.3	6yellow	328.37	---	---	---	15.431	---	---	---	1021.73	49.074	15.431	---	---	21.427	---	---	---	112.212	---	---	---	58.083	---	---	---
2020-09-01	10:53:53	10105.3	6yellow	328.43	---	---	---	15.429	---	---	---	1021.71	49.084	15.429	---	---	21.425	---	---	---	112.236	---	---	---	57.614	---	---	---
2020-09-01	10:53:54	10106.3	6yellow	328.17	---	---	---	15.427	---	---	---	1021.72	49.084	15.427	---	---	21.435	---	---	---	112.21	---	---	---	57.564	---	---	---
2020-09-01	10:53:55	10107.3	6yellow	328.04	---	---	---	15.427	---	---	---	1021.73	49.097	15.427	---	---	21.439	---	---	---	112.131	---	---	---	56.765	---	---	---
2020-09-01	12:45:24	16795.7	6yellow	308.32	---	---	---	15.303	---	---	---	1021.22	29.044	15.303	---	---	22.186	---	---	---	104.852	---	---	---	74.343	---	---	---
2020-09-01	12:45:25	16796.7	6yellow	308.24	---	---	---	15.299	---	---	---	1021.21	28.505	15.299	---	---	22.19	---	---	---	104.736	---	---	---	46.556	---	---	---
2020-09-01	12:45:26	16797.7	6yellow	307.66	---	---	---	15.298	---	---	---	1021.19	27.869	15.298	---	---	22.212	---	---	---	104.793	---	---	---	33.114	---	---	---
2020-09-01	12:45:27	16798.7	6yellow	307.5	---	---	---	15.301	---	---	---	1021.19	27.722	15.301	---	---	22.217	---	---	---	104.792	---	---	---	33.096	---	---	---
2020-09-01	12:45:28	16799.7	6yellow	307.4	---	---	---	15.303	---	---	---	1021.16	27.694	15.303	---	---	22.22	---	---	---	104.782	---	---	---	33.002	---	---	---
2020-09-01	12:45:29	16800.7	6yellow	307.26	---	---	---	15.304	---	---	---	1021.17	27.762	15.304	---	---	22.225	---	---	---	104.781	---	---	---	32.833	---	---	---
2020-09-01	12:45:30	16801.7	6yellow	307.03	---	---	---	15.304	---	---	---	1021.16	27.856	15.304	---	---	22.233	---	---	---	104.803	---	---	---	32.722	---	---	---
2020-09-01	12:45:31	16802.7	6yellow	307.24	---	---	---	15.307	---	---	---	1021.19	27.938	15.307	---	---	22.224	---	---	---	104.792	---	---	---	33.156	---	---	---
2020-09-01	12:45:32	16803.7	6yellow	307.16	---	---	---	15.308	---	---	---	1021.17	27.991	15.308	---	---	22.227	---	---	---	104.79	---	---	---	33.389	---	---	---
2020-09-01	12:45:33	16804.7	6yellow	307.33	---	---	---	15.31	---	---	---	1021.16	27.991	15.31	---	---	22.22	---	---	---	104.779	---	---	---	33.584	---	---	---
2020-09-01	12:45:34	16805.7	6yellow	307.17	---	---	---	15.31	---	---	---	1021.15	27.978	15.31	---	---	22.226	---	---	---	104.792	---	---	---	33.432	---	---	---
2020-09-01	12:45:35	16806.7	6yellow	307.38	---	---	---	15.312	---	---	---	1021.15	27.938	15.312	---	---	22.217	---	---	---	104.787	---	---	---	33.464	---	---	---
2020-09-01	12:45:36	16807.7	6yellow	307.41	---	---	---	15.313	---	---	---	1021.17	27.912	15.313	---	---	22.216	---	---	---	104.778	---	---	---	33.256	---	---	---
2020-09-01	12:45:37	16808.7	6yellow	307.31	---	---	---	15.314	---	---	---	1021.15	27.872	15.314	---	---	22.219	---	---	---	104.765	---	---	---	33.273	---	---	---
2020-09-01	12:45:38	16809.7	6yellow	307.22	---	---	---	15.311	---	---	---	1021.15	27.884	15.311	---	---	22.223	---	---	---	104.744	---	---	---	33.398	---	---	---
2020-09-01	12:45:39	16810.7	6yellow	307.23	---	---	---	15.311	---	---	---	1021.14	27.938	15.311	---	---	22.223	---	---	---	104.739	---	---	---	33.631	---	---	---
2020-09-01	12:45:40	16811.7	6yellow	307.3	---	---	---	15.311	---	---	---	1021.17	27.991	15.311	---	---	22.221	---	---	---	104.732	---	---	---	33.837	---	---	---
2020-09-01	15:21:42	26173.7	6yellow	309.85	---	---	---	15.277	---	---	---	1020.92	36.686	15.277	---	---	22.206	---	---	---	106.693	---	---	---	28.957	---	---	---
2020-09-01	15:21:43	26174.7	6yellow	288.97	---	---	---	15.275	---	---	---	1020.93	36.335	15.275	---	---	23.009	---	---	---	111.128	---	---	---	26.362	---	---	---
2020-09-01	15:21:44	26175.7	6yellow	267.87	---	---	---	15.272	---	---	---	1020.91	35.984	15.272	---	---	23.822	---	---	---	115.548	---	---	---	23.659	---	---	---
2020-09-01	15:21:45	26176.7	6yellow	268	---	---	---	15.274	---	---	---	1020.9	35.984	15.274	---	---	23.816	---	---	---	115.575	---	---	---	23.475	---	---	---
2020-09-01	15:21:46	26177.7	6yellow	268.02	---	---	---	15.277	---	---	---	1020.91	35.971	15.277	---	---	23.813	---	---	---	115.493	---	---	---	23.645	---	---	---
2020-09-01	15:21:47	26178.7	6yellow	268.46	---	---	---	15.28	---	---	---	1020.93	35.948	15.28	---	---	23.793	---	---	---	115.434	---	---	---	23.95	---	---	---
2020-09-01	15:21:48	26179.7	6yellow	268.22	---	---	---	15.282	---	---	---	1020.95	35.925	15.282	---	---	23.803	---	---	---	115.384	---	---	---	24.568	---	---	---
2020-09-01	15:21:49	26180.7	6yellow	268.26	---	---	---	15.283	---	---	---	1020.96	35.925	15.283	---	---	23.801	---	---	---	115.391	---	---	---	24.738	---	---	---
2020-09-01	15:21:50	26181.7	6yellow	268.04	---	---	---	15.284	---	---	---	1020.95	35.948	15.284	---	---	23.81	---	---	---	115.416	---	---	---	24.458	---	---	---
2020-09-01	15:21:51	26182.7	6yellow	268.51	---	---	---	15.284	---	---	---	1020.92	35.982	15.284	---	---	23.789	---	---	---	115.378	---	---	---	23.24	---	---	---
2020-09-01	15:21:52	26183.7	6yellow	268.81	---	---	---	15.285	---	---	---	1020.91	36.005	15.285	---	---	23.776	---	---	---	115.249	---	---	---	22.852	---	---	---
2020-09-01	15:21:53	26184.7	6yellow	269.26	---	---	---	15.285	---	---	---	1020.88	36.005	15.285	---	---	23.757	---	---	---	115.061	---	---	---	22.893	---	---	---
2020-09-01	15:21:54	26185.7	6yellow	269.39	---	---	---	15.284	---	---	---	1020.87	35.971	15.284	---	---	23.752	---	---	---	114.932	---	---	---	23.289	---	---	---
2020-09-01	15:21:55	26186.7	6yellow	269.62	---	---	---	15.282	---	---	---	1020.84	35.925	15.282	---	---	23.742	---	---	---	114.896	---	---	---	23.367	---	---	---
2020-09-01	10:22:07	8198.84	8blue	297.44	---	---	---	20.067	---	---	---	1021.64	48.677	20.067	---	---	20.878	---	---	---	110.918	---	---	---	47.234	---	---	---
2020-09-01	10:22:08	8199.84	8blue	294.61	---	---	---	20.18	---	---	---	1021.59	45.905	20.18	---	---	20.945	---	---	---	109.545	---	---	---	41.293	---	---	---
2020-09-01	10:22:09	8200.84	8blue	292.09	---	---	---	20.293	---	---	---	1021.54	43.179	20.293	---	---	21	---	---	---	108.165	---	---	---	35.383	---	---	---
2020-09-01	10:22:10	8201.84	8blue	291.7	---	---	---	20.291	---	---	---	1021.51	43.301	20.291	---	---	21.016	---	---	---	108.162	---	---	---	35.404	---	---	---
2020-09-01	10:22:11	8202.84	8blue	291.82	---	---	---	20.299	---	---	---	1021.56	43.379	20.299	---	---	21.008	---	---	---	108.152	---	---	---	35.323	---	---	---
2020-09-01	10:22:12	8203.84	8blue	291.6	---	---	---	20.312	---	---	---	1021.58	43.379	20.312	---	---	21.012	---	---	---	108.152	---	---	---	35.353	---	---	---
2020-09-01	10:22:13	8204.84	8blue	291.47	---	---	---	20.326	---	---	---	1021.61	43.346	20.326	---	---	21.013	---	---	---	108.112	---	---	---	35.331	---	---	---
2020-09-01	10:22:14	8205.84	8blue	291.29	---	---	---	20.338	---	---	---	1021.55	43.201	20.338	---	---	21.015	---	---	---	108.092	---	---	---	35.208	---	---	---
2020-09-01	10:22:15	8206.84	8blue	291.32	---	---	---	20.346	---	---	---	1021.54	43.023	20.346	---	---	21.011	---	---	---	108.046	---	---	---	35.164	---	---	---
2020-09-01	10:22:16	8207.84	8blue	291.38	---	---	---	20.353	---	---	---	1021.52	42.868	20.353	---	---	21.007	---	---	---	108.036	---	---	---	35.21	---	---	---
2020-09-01	10:22:17	8208.84	8blue	291.24	---	---	---	20.361	---	---	---	1021.55	42.845	20.361	---	---	21.009	---	---	---	108.012	---	---	---	35.435	---	---	---
2020-09-01	10:22:18	8209.84	8blue	291.21	---	---	---	20.367	---	---	---	1021.56	42.912	20.367	---	---	21.009	---	---	---	108.008	---	---	---	35.349	---	---	---
2020-09-01	10:22:19	8210.84	8blue	291.11	---	---	---	20.369	---	---	---	1021.56	42.935	20.369	---	---	21.012	---	---	---	107.991	---	---	---	35.45	---	---	---
2020-09-01	10:22:20	8211.84	8blue	291.21	---	---	---	20.367	---	---	---	1021.57	42.891	20.367	---	---	21.008	---	---	---	107.977	---	---	---	35.503	---	---	---
2020-09-01	10:22:21	8212.83	8blue	291.26	---	---	---	20.367	---	---	---	1021.55	42.759	20.367	---	---	21.007	---	---	---	107.975	---	---	---	35.863	---	---	---
2020-09-01	12:27:51	15742.8	8blue	286.34	---	---	---	20.301	---	---	---	1021.27	28.985	20.301	---	---	21.22	---	---	---	99.464	---	---	---	26.941	---	---	---
2020-09-01	12:27:52	15743.8	8blue	283.11	---	---	---	20.359	---	---	---	1021.3	30.725	20.359	---	---	21.326	---	---	---	101.055	---	---	---	23.882	---	---	---
2020-09-01	12:27:53	15744.8	8blue	279.75	---	---	---	20.417	---	---	---	1021.38	32.436	20.417	---	---	21.437	---	---	---	102.666	---	---	---	20.722	---	---	---
2020-09-01	12:27:54	15745.8	8blue	279.72	---	---	---	20.42	---	---	---	1021.34	32.449	20.42	---	---	21.437	---	---	---	102.663	---	---	---	20.721	---	---	---
2020-09-01	12:27:55	15746.8	8blue	279.79	---	---	---	20.422	---	---	---	1021.35	32.477	20.422	---	---	21.434	---	---	---	102.662	---	---	---	20.666	---	---	---
2020-09-01	12:27:56	15747.8	8blue	279.92	---	---	---	20.423	---	---	---	1021.37	32.518	20.423	---	---	21.428	---	---	---	102.663	---	---	---	20.585	---	---	---
2020-09-01	12:27:57	15748.8	8blue	279.9	---	---	---	20.421	---	---	---	1021.36	32.558	20.421	---	---	21.43	---	---	---	102.674	---	---	---	20.423	---	---	---
2020-09-01	12:27:58	15749.8	8blue	279.9	---	---	---	20.422	---	---	---	1021.39	32.597	20.422	---	---	21.43	---	---	---	102.687	---	---	---	20.422	---	---	---
2020-09-01	12:27:59	15750.8	8blue	279.7	---	---	---	20.423	---	---	---	1021.38	32.638	20.423	---	---	21.437	---	---	---	102.663	---	---	---	20.33	---	---	---
2020-09-01	12:28:00	15751.8	8blue	279.68	---	---	---	20.425	---	---	---	1021.36	32.678	20.425	---	---	21.437	---	---	---	102.669	---	---	---	20.345	---	---	---
2020-09-01	12:28:01	15752.8	8blue	279.64	---	---	---	20.425	---	---	---	1021.36	32.719	20.425	---	---	21.439	---	---	---	102.688	---	---	---	20.646	---	---	---
2020-09-01	12:28:02	15753.8	8blue	279.84	---	---	---	20.426	---	---	---	1021.33	32.732	20.426	---	---	21.431	---	---	---	102.725	---	---	---	20.809	---	---	---
2020-09-01	12:28:03	15754.8	8blue	279.89	---	---	---	20.427	---	---	---	1021.37	32.65	20.427	---	---	21.429	---	---	---	102.744	---	---	---	20.99	---	---	---
2020-09-01	12:28:04	15755.8	8blue	279.94	---	---	---	20.426	---	---	---	1021.35	32.503	20.426	---	---	21.427	---	---	---	102.75	---	---	---	20.754	---	---	---
2020-09-01	12:28:05	15756.8	8blue	279.94	---	---	---	20.424	---	---	---	1021.37	32.383	20.424	---	---	21.427	---	---	---	102.764	---	---	---	20.624	---	---	---
2020-09-01	12:28:06	15757.8	8blue	279.86	---	---	---	20.422	---	---	---	1021.36	32.345	20.422	---	---	21.431	---	---	---	102.771	---	---	---	20.531	---	---	---
2020-09-01	12:28:07	15758.8	8blue	279.91	---	---	---	20.422	---	---	---	1021.36	32.327	20.422	---	---	21.429	---	---	---	102.781	---	---	---	20.492	---	---	---
2020-09-01	12:28:08	15759.8	8blue	279.87	---	---	---	20.421	---	---	---	1021.34	32.294	20.421	---	---	21.431	---	---	---	102.781	---	---	---	20.508	---	---	---
2020-09-01	12:28:09	15760.8	8blue	280	---	---	---	20.424	---	---	---	1021.34	32.274	20.424	---	---	21.425	---	---	---	102.788	---	---	---	20.52	---	---	---
2020-09-01	12:28:10	15761.8	8blue	279.93	---	---	---	20.424	---	---	---	1021.33	32.299	20.424	---	---	21.428	---	---	---	102.794	---	---	---	20.411	---	---	---
2020-09-01	15:00:59	24931	8blue	275.27	---	---	---	20.36	---	---	---	1021.23	30.453	20.36	---	---	21.638	---	---	---	98.477	---	---	---	26.275	---	---	---
2020-09-01	15:01:00	24932	8blue	272.66	---	---	---	20.374	---	---	---	1021.19	31.824	20.374	---	---	21.74	---	---	---	99.916	---	---	---	37.888	---	---	---
2020-09-01	15:01:01	24933.1	8blue	269.58	---	---	---	20.391	---	---	---	1021.14	33.207	20.391	---	---	21.86	---	---	---	101.388	---	---	---	51.359	---	---	---
2020-09-01	15:01:02	24934	8blue	269.23	---	---	---	20.401	---	---	---	1021.12	33.26	20.401	---	---	21.872	---	---	---	101.452	---	---	---	56.406	---	---	---
2020-09-01	15:01:03	24935	8blue	268.45	---	---	---	20.412	---	---	---	1021.1	33.354	20.412	---	---	21.9	---	---	---	101.564	---	---	---	59.871	---	---	---
2020-09-01	15:01:04	24936.1	8blue	267.94	---	---	---	20.421	---	---	---	1021.15	33.456	20.421	---	---	21.919	---	---	---	101.673	---	---	---	61.649	---	---	---
2020-09-01	15:01:05	24937	8blue	267.27	---	---	---	20.433	---	---	---	1021.13	33.583	20.433	---	---	21.943	---	---	---	101.817	---	---	---	62.034	---	---	---
2020-09-01	15:01:06	24938	8blue	266.94	---	---	---	20.443	---	---	---	1021.1	33.67	20.443	---	---	21.953	---	---	---	101.95	---	---	---	63.003	---	---	---
2020-09-01	15:01:07	24939	8blue	266.33	---	---	---	20.454	---	---	---	1021.06	33.749	20.454	---	---	21.975	---	---	---	102.085	---	---	---	65.101	---	---	---
2020-09-01	15:01:08	24940	8blue	265.55	---	---	---	20.458	---	---	---	1021.05	33.787	20.458	---	---	22.007	---	---	---	102.221	---	---	---	67.346	---	---	---
2020-09-01	15:01:09	24941.1	8blue	265.05	---	---	---	20.46	---	---	---	1021.07	33.828	20.46	---	---	22.028	---	---	---	102.346	---	---	---	69.26	---	---	---
2020-09-01	15:01:10	24942	8blue	264.84	---	---	---	20.459	---	---	---	1021.06	33.868	20.459	---	---	22.037	---	---	---	102.469	---	---	---	70.531	---	---	---
2020-09-01	15:01:11	24943.1	8blue	264.61	---	---	---	20.461	---	---	---	1021.08	33.896	20.461	---	---	22.046	---	---	---	102.544	---	---	---	71.334	---	---	---
2020-09-01	15:01:12	24944	8blue	263.87	---	---	---	20.464	---	---	---	1021.1	33.896	20.464	---	---	22.077	---	---	---	102.609	---	---	---	71.646	---	---	---
2020-09-01	10:24:08	8319.99	8green	293.08	---	---	---	20.381	---	---	---	1021.55	42.721	20.381	---	---	20.933	---	---	---	107.089	---	---	---	57.768	---	---	---
2020-09-01	10:24:09	8320.99	8green	293.85	---	---	---	20.386	---	---	---	1021.58	42.739	20.386	---	---	20.903	---	---	---	106.751	---	---	---	52.059	---	---	---
2020-09-01	10:24:10	8321.99	8green	294.51	---	---	---	20.394	---	---	---	1021.57	42.746	20.394	---	---	20.875	---	---	---	106.428	---	---	---	46.882	---	---	---
2020-09-01	10:24:11	8322.99	8green	294.43	---	---	---	20.402	---	---	---	1021.53	42.8	20.402	---	---	20.876	---	---	---	106.398	---	---	---	47.487	---	---	---
2020-09-01	10:24:12	8323.99	8green	294.35	---	---	---	20.404	---	---	---	1021.54	42.845	20.404	---	---	20.878	---	---	---	106.406	---	---	---	47.289	---	---	---
2020-09-01	10:24:13	8324.99	8green	294.34	---	---	---	20.407	---	---	---	1021.54	42.891	20.407	---	---	20.877	---	---	---	106.384	---	---	---	46.972	---	---	---
2020-09-01	10:24:14	8325.99	8green	294.25	---	---	---	20.409	---	---	---	1021.59	42.937	20.409	---	---	20.88	---	---	---	106.377	---	---	---	46.662	---	---	---
2020-09-01	10:24:15	8326.99	8green	294.18	---	---	---	20.412	---	---	---	1021.57	42.993	20.412	---	---	20.882	---	---	---	106.392	---	---	---	46.755	---	---	---
2020-09-01	10:24:16	8327.99	8green	294.05	---	---	---	20.413	---	---	---	1021.56	43.059	20.413	---	---	20.886	---	---	---	106.392	---	---	---	47.529	---	---	---
2020-09-01	10:24:17	8328.99	8green	294.38	---	---	---	20.414	---	---	---	1021.58	43.125	20.414	---	---	20.874	---	---	---	106.33	---	---	---	47.479	---	---	---
2020-09-01	10:24:18	8329.99	8green	294.8	---	---	---	20.415	---	---	---	1021.58	43.148	20.415	---	---	20.857	---	---	---	106.214	---	---	---	47.581	---	---	---
2020-09-01	10:24:19	8330.99	8green	295.12	---	---	---	20.415	---	---	---	1021.58	43.125	20.415	---	---	20.845	---	---	---	106.107	---	---	---	47.208	---	---	---
2020-09-01	10:24:20	8331.99	8green	295.14	---	---	---	20.417	---	---	---	1021.56	43.082	20.417	---	---	20.844	---	---	---	106.06	---	---	---	47.184	---	---	---
2020-09-01	10:24:21	8332.99	8green	295.27	---	---	---	20.417	---	---	---	1021.55	43.069	20.417	---	---	20.839	---	---	---	106.037	---	---	---	47.032	---	---	---
2020-09-01	10:24:22	8333.99	8green	295.5	---	---	---	20.417	---	---	---	1021.6	43.069	20.417	---	---	20.831	---	---	---	106.017	---	---	---	47.263	---	---	---
2020-09-01	10:24:23	8334.99	8green	295.74	---	---	---	20.417	---	---	---	1021.59	43	20.417	---	---	20.822	---	---	---	105.953	---	---	---	47.365	---	---	---
2020-09-01	10:24:24	8335.99	8green	296.22	---	---	---	20.416	---	---	---	1021.59	42.845	20.416	---	---	20.804	---	---	---	105.841	---	---	---	47.433	---	---	---
2020-09-01	12:29:42	15853.8	8green	275.12	---	---	---	20.421	---	---	---	1021.39	33.466	20.421	---	---	21.623	---	---	---	104.617	---	---	---	9.573	---	---	---
2020-09-01	12:29:43	15854.8	8green	272.76	---	---	---	20.417	---	---	---	1021.37	33.415	20.417	---	---	21.721	---	---	---	105.328	---	---	---	9.346	---	---	---
2020-09-01	12:29:44	15855.8	8green	270.43	---	---	---	20.416	---	---	---	1021.36	33.344	20.416	---	---	21.817	---	---	---	106.026	---	---	---	9.074	---	---	---
2020-09-01	12:29:45	15856.8	8green	270.48	---	---	---	20.42	---	---	---	1021.34	33.331	20.42	---	---	21.814	---	---	---	106.038	---	---	---	8.938	---	---	---
2020-09-01	12:29:46	15857.8	8green	270.43	---	---	---	20.424	---	---	---	1021.31	33.331	20.424	---	---	21.815	---	---	---	106.029	---	---	---	8.85	---	---	---
2020-09-01	12:29:47	15858.8	8green	270.38	---	---	---	20.424	---	---	---	1021.3	33.37	20.424	---	---	21.817	---	---	---	106.038	---	---	---	8.806	---	---	---
2020-09-01	12:29:48	15859.8	8green	270.09	---	---	---	20.425	---	---	---	1021.32	33.41	20.425	---	---	21.828	---	---	---	106.044	---	---	---	8.771	---	---	---
2020-09-01	12:29:49	15860.8	8green	270.05	---	---	---	20.427	---	---	---	1021.33	33.464	20.427	---	---	21.829	---	---	---	106.063	---	---	---	8.864	---	---	---
2020-09-01	12:29:50	15861.8	8green	269.96	---	---	---	20.427	---	---	---	1021.31	33.533	20.427	---	---	21.833	---	---	---	106.071	---	---	---	8.932	---	---	---
2020-09-01	12:29:51	15862.8	8green	270.2	---	---	---	20.426	---	---	---	1021.31	33.612	20.426	---	---	21.823	---	---	---	106.094	---	---	---	9.032	---	---	---
2020-09-01	12:29:52	15863.8	8green	270.3	---	---	---	20.425	---	---	---	1021.32	33.69	20.425	---	---	21.819	---	---	---	106.111	---	---	---	9.014	---	---	---
2020-09-01	12:29:53	15864.8	8green	270.31	---	---	---	20.424	---	---	---	1021.33	33.756	20.424	---	---	21.819	---	---	---	106.128	---	---	---	9.042	---	---	---
2020-09-01	15:02:25	25017.4	8green	258.99	---	---	---	20.429	---	---	---	1021.06	34.138	20.429	---	---	22.315	---	---	---	104.486	---	---	---	44.104	---	---	---
2020-09-01	15:02:26	25018.4	8green	250.74	---	---	---	20.429	---	---	---	1021.08	34.173	20.429	---	---	22.684	---	---	---	106.595	---	---	---	54.063	---	---	---
2020-09-01	15:02:27	25019.4	8green	242.37	---	---	---	20.429	---	---	---	1021.11	34.209	20.429	---	---	23.059	---	---	---	108.706	---	---	---	63.519	---	---	---
2020-09-01	15:02:28	25020.4	8green	242.19	---	---	---	20.439	---	---	---	1021.13	34.186	20.439	---	---	23.064	---	---	---	108.729	---	---	---	65.171	---	---	---
2020-09-01	15:02:29	25021.4	8green	242.16	---	---	---	20.444	---	---	---	1021.11	34.168	20.444	---	---	23.064	---	---	---	108.697	---	---	---	67.748	---	---	---
2020-09-01	15:02:30	25022.4	8green	242.16	---	---	---	20.451	---	---	---	1021.12	34.156	20.451	---	---	23.061	---	---	---	108.669	---	---	---	70.725	---	---	---
2020-09-01	15:02:31	25023.4	8green	242.12	---	---	---	20.456	---	---	---	1021.09	34.156	20.456	---	---	23.061	---	---	---	108.657	---	---	---	74.038	---	---	---
2020-09-01	15:02:32	25024.4	8green	241.97	---	---	---	20.464	---	---	---	1021.12	34.151	20.464	---	---	23.066	---	---	---	108.696	---	---	---	76.233	---	---	---
2020-09-01	15:02:33	25025.4	8green	242.01	---	---	---	20.468	---	---	---	1021.12	34.14	20.468	---	---	23.063	---	---	---	108.729	---	---	---	76.849	---	---	---
2020-09-01	15:02:34	25026.4	8green	241.85	---	---	---	20.47	---	---	---	1021.14	34.122	20.47	---	---	23.069	---	---	---	108.749	---	---	---	75.444	---	---	---
2020-09-01	15:02:35	25027.4	8green	241.67	---	---	---	20.471	---	---	---	1021.11	34.127	20.471	---	---	23.078	---	---	---	108.806	---	---	---	71.239	---	---	---
2020-09-01	15:02:36	25028.4	8green	241.55	---	---	---	20.473	---	---	---	1021.09	34.132	20.473	---	---	23.083	---	---	---	108.82	---	---	---	64.53	---	---	---
2020-09-01	15:02:37	25029.4	8green	241.55	---	---	---	20.469	---	---	---	1021.1	34.145	20.469	---	---	23.084	---	---	---	108.884	---	---	---	48.508	---	---	---
2020-09-01	15:02:38	25030.4	8green	241.71	---	---	---	20.462	---	---	---	1021.15	34.145	20.462	---	---	23.079	---	---	---	108.893	---	---	---	33.444	---	---	---
2020-09-01	15:02:39	25031.4	8green	241.76	---	---	---	20.451	---	---	---	1021.19	34.155	20.451	---	---	23.08	---	---	---	108.908	---	---	---	21.011	---	---	---
2020-09-01	15:02:40	25032.4	8green	242	---	---	---	20.44	---	---	---	1021.2	34.166	20.44	---	---	23.073	---	---	---	108.855	---	---	---	18.731	---	---	---
2020-09-01	10:23:10	8261.94	8orange	291.81	---	---	---	20.365	---	---	---	1021.59	42.622	20.365	---	---	20.986	---	---	---	107.81	---	---	---	44.679	---	---	---
2020-09-01	10:23:11	8262.94	8orange	292.02	---	---	---	20.362	---	---	---	1021.58	42.528	20.362	---	---	20.979	---	---	---	107.691	---	---	---	53.816	---	---	---
2020-09-01	10:23:12	8263.94	8orange	292.23	---	---	---	20.354	---	---	---	1021.58	42.49	20.354	---	---	20.974	---	---	---	107.545	---	---	---	62.717	---	---	---
2020-09-01	10:23:13	8264.94	8orange	291.95	---	---	---	20.347	---	---	---	1021.54	42.553	20.347	---	---	20.987	---	---	---	107.559	---	---	---	63.161	---	---	---
2020-09-01	10:23:14	8265.94	8orange	292.19	---	---	---	20.339	---	---	---	1021.52	42.673	20.339	---	---	20.981	---	---	---	107.485	---	---	---	62.995	---	---	---
2020-09-01	10:23:15	8266.94	8orange	292.56	---	---	---	20.338	---	---	---	1021.54	42.815	20.338	---	---	20.967	---	---	---	107.39	---	---	---	62.603	---	---	---
2020-09-01	10:23:16	8267.94	8orange	293.13	---	---	---	20.339	---	---	---	1021.55	42.904	20.339	---	---	20.945	---	---	---	107.287	---	---	---	61.367	---	---	---
2020-09-01	10:23:17	8268.94	8orange	293.36	---	---	---	20.341	---	---	---	1021.58	42.927	20.341	---	---	20.936	---	---	---	107.262	---	---	---	61.906	---	---	---
2020-09-01	10:23:18	8269.94	8orange	293.35	---	---	---	20.346	---	---	---	1021.56	42.937	20.346	---	---	20.935	---	---	---	107.267	---	---	---	62.615	---	---	---
2020-09-01	10:23:19	8270.94	8orange	292.9	---	---	---	20.347	---	---	---	1021.51	42.947	20.347	---	---	20.951	---	---	---	107.354	---	---	---	63.618	---	---	---
2020-09-01	10:23:20	8271.94	8orange	292.39	---	---	---	20.35	---	---	---	1021.49	42.947	20.35	---	---	20.97	---	---	---	107.416	---	---	---	63.728	---	---	---
2020-09-01	10:23:21	8272.94	8orange	292.05	---	---	---	20.352	---	---	---	1021.49	42.96	20.352	---	---	20.982	---	---	---	107.478	---	---	---	63.08	---	---	---
2020-09-01	10:23:22	8273.94	8orange	291.94	---	---	---	20.359	---	---	---	1021.54	42.993	20.359	---	---	20.984	---	---	---	107.479	---	---	---	63.484	---	---	---
2020-09-01	10:23:23	8274.94	8orange	291.77	---	---	---	20.368	---	---	---	1021.51	43.059	20.368	---	---	20.987	---	---	---	107.489	---	---	---	65.063	---	---	---
2020-09-01	10:23:24	8275.94	8orange	291.7	---	---	---	20.377	---	---	---	1021.51	43.069	20.377	---	---	20.987	---	---	---	107.475	---	---	---	64.638	---	---	---
2020-09-01	10:23:25	8276.94	8orange	291.75	---	---	---	20.383	---	---	---	1021.5	42.96	20.383	---	---	20.983	---	---	---	107.443	---	---	---	63.304	---	---	---
2020-09-01	10:23:26	8277.94	8orange	291.86	---	---	---	20.385	---	---	---	1021.55	42.805	20.385	---	---	20.978	---	---	---	107.344	---	---	---	64.04	---	---	---
2020-09-01	10:23:27	8278.94	8orange	291.87	---	---	---	20.386	---	---	---	1021.56	42.693	20.386	---	---	20.978	---	---	---	107.331	---	---	---	65.187	---	---	---
2020-09-01	10:23:28	8279.94	8orange	292.04	---	---	---	20.383	---	---	---	1021.56	42.713	20.383	---	---	20.972	---	---	---	107.337	---	---	---	66.157	---	---	---
2020-09-01	12:28:55	15807.3	8orange	279.12	---	---	---	20.421	---	---	---	1021.36	32.538	20.421	---	---	21.461	---	---	---	103.146	---	---	---	17.171	---	---	---
2020-09-01	12:28:56	15808.3	8orange	278.35	---	---	---	20.418	---	---	---	1021.38	32.78	20.418	---	---	21.493	---	---	---	103.508	---	---	---	14.013	---	---	---
2020-09-01	12:28:57	15809.3	8orange	277.62	---	---	---	20.415	---	---	---	1021.41	33.009	20.415	---	---	21.523	---	---	---	103.857	---	---	---	10.799	---	---	---
2020-09-01	12:28:58	15810.3	8orange	277.91	---	---	---	20.417	---	---	---	1021.43	33.037	20.417	---	---	21.511	---	---	---	103.867	---	---	---	10.875	---	---	---
2020-09-01	12:28:59	15811.3	8orange	277.99	---	---	---	20.418	---	---	---	1021.41	33.009	20.418	---	---	21.507	---	---	---	103.861	---	---	---	10.685	---	---	---
2020-09-01	12:29:00	15812.3	8orange	278.02	---	---	---	20.421	---	---	---	1021.39	32.968	20.421	---	---	21.505	---	---	---	103.879	---	---	---	10.537	---	---	---
2020-09-01	12:29:01	15813.3	8orange	277.87	---	---	---	20.425	---	---	---	1021.37	32.915	20.425	---	---	21.51	---	---	---	103.878	---	---	---	10.297	---	---	---
2020-09-01	12:29:02	15814.3	8orange	277.69	---	---	---	20.426	---	---	---	1021.38	32.927	20.426	---	---	21.516	---	---	---	103.881	---	---	---	10.106	---	---	---
2020-09-01	12:29:03	15815.3	8orange	277.74	---	---	---	20.426	---	---	---	1021.39	32.968	20.426	---	---	21.514	---	---	---	103.873	---	---	---	9.986	---	---	---
2020-09-01	12:29:04	15816.3	8orange	277.66	---	---	---	20.427	---	---	---	1021.38	33.021	20.427	---	---	21.517	---	---	---	103.889	---	---	---	9.989	---	---	---
2020-09-01	12:29:05	15817.3	8orange	277.75	---	---	---	20.428	---	---	---	1021.37	33.087	20.428	---	---	21.513	---	---	---	103.893	---	---	---	9.975	---	---	---
2020-09-01	12:29:06	15818.3	8orange	277.69	---	---	---	20.428	---	---	---	1021.34	33.192	20.428	---	---	21.516	---	---	---	103.91	---	---	---	9.992	---	---	---
2020-09-01	12:29:07	15819.3	8orange	277.59	---	---	---	20.428	---	---	---	1021.33	33.296	20.428	---	---	21.52	---	---	---	103.907	---	---	---	9.968	---	---	---
2020-09-01	12:29:08	15820.3	8orange	277.52	---	---	---	20.429	---	---	---	1021.36	33.378	20.429	---	---	21.522	---	---	---	103.923	---	---	---	9.886	---	---	---
2020-09-01	12:29:09	15821.3	8orange	277.5	---	---	---	20.428	---	---	---	1021.39	33.418	20.428	---	---	21.523	---	---	---	103.931	---	---	---	9.821	---	---	---
2020-09-01	12:29:10	15822.3	8orange	277.52	---	---	---	20.427	---	---	---	1021.41	33.459	20.427	---	---	21.523	---	---	---	103.931	---	---	---	9.696	---	---	---
2020-09-01	12:29:11	15823.3	8orange	277.52	---	---	---	20.427	---	---	---	1021.4	33.492	20.427	---	---	21.523	---	---	---	103.938	---	---	---	9.745	---	---	---
2020-09-01	15:01:43	24974.6	8orange	264.83	---	---	---	20.434	---	---	---	1021.1	33.904	20.434	---	---	22.047	---	---	---	102.499	---	---	---	54.023	---	---	---
2020-09-01	15:01:44	24975.6	8orange	265.99	---	---	---	20.406	---	---	---	1021.1	33.896	20.406	---	---	22.007	---	---	---	102.384	---	---	---	37.202	---	---	---
2020-09-01	15:01:45	24976.6	8orange	267.18	---	---	---	20.38	---	---	---	1021.12	33.889	20.38	---	---	21.965	---	---	---	102.279	---	---	---	20.97	---	---	---
2020-09-01	15:01:46	24977.6	8orange	266.87	---	---	---	20.39	---	---	---	1021.14	33.861	20.39	---	---	21.975	---	---	---	102.325	---	---	---	22.621	---	---	---
2020-09-01	15:01:47	24978.6	8orange	266.53	---	---	---	20.399	---	---	---	1021.13	33.876	20.399	---	---	21.986	---	---	---	102.375	---	---	---	24.273	---	---	---
2020-09-01	15:01:48	24979.6	8orange	266.58	---	---	---	20.408	---	---	---	1021.11	33.904	20.408	---	---	21.981	---	---	---	102.381	---	---	---	25.682	---	---	---
2020-09-01	15:01:49	24980.6	8orange	266.7	---	---	---	20.417	---	---	---	1021.1	33.932	20.417	---	---	21.973	---	---	---	102.361	---	---	---	26.939	---	---	---
2020-09-01	15:01:50	24981.6	8orange	266.75	---	---	---	20.421	---	---	---	1021.13	33.957	20.421	---	---	21.969	---	---	---	102.343	---	---	---	28.099	---	---	---
2020-09-01	15:01:51	24982.6	8orange	266.64	---	---	---	20.422	---	---	---	1021.12	34.011	20.422	---	---	21.973	---	---	---	102.345	---	---	---	28.959	---	---	---
2020-09-01	15:01:52	24983.6	8orange	266.47	---	---	---	20.424	---	---	---	1021.12	34.064	20.424	---	---	21.98	---	---	---	102.349	---	---	---	30.246	---	---	---
2020-09-01	15:01:53	24984.6	8orange	266.7	---	---	---	20.427	---	---	---	1021.07	34.092	20.427	---	---	21.969	---	---	---	102.362	---	---	---	31.949	---	---	---
2020-09-01	15:01:54	24985.6	8orange	267	---	---	---	20.432	---	---	---	1021.05	34.092	20.432	---	---	21.955	---	---	---	102.377	---	---	---	34.345	---	---	---
2020-09-01	10:29:28	8640.4	8red	288.7	---	---	---	20.399	---	---	---	1021.58	40.831	20.399	---	---	21.095	---	---	---	106.433	---	---	---	38.438	---	---	---
2020-09-01	10:29:29	8641.4	8red	290.54	---	---	---	20.392	---	---	---	1021.59	40.727	20.392	---	---	21.027	---	---	---	105.95	---	---	---	52.821	---	---	---
2020-09-01	10:29:30	8642.4	8red	292.28	---	---	---	20.389	---	---	---	1021.65	40.646	20.389	---	---	20.961	---	---	---	105.471	---	---	---	68.696	---	---	---
2020-09-01	10:29:31	8643.41	8red	292.16	---	---	---	20.394	---	---	---	1021.66	40.735	20.394	---	---	20.964	---	---	---	105.469	---	---	---	68.713	---	---	---
2020-09-01	10:29:32	8644.41	8red	292.17	---	---	---	20.395	---	---	---	1021.66	40.768	20.395	---	---	20.963	---	---	---	105.475	---	---	---	69.39	---	---	---
2020-09-01	10:29:33	8645.41	8red	292.14	---	---	---	20.391	---	---	---	1021.59	40.757	20.391	---	---	20.966	---	---	---	105.497	---	---	---	69.181	---	---	---
2020-09-01	10:29:34	8646.4	8red	292.11	---	---	---	20.39	---	---	---	1021.53	40.691	20.39	---	---	20.967	---	---	---	105.489	---	---	---	68.67	---	---	---
2020-09-01	10:29:35	8647.41	8red	292.3	---	---	---	20.386	---	---	---	1021.54	40.638	20.386	---	---	20.961	---	---	---	105.481	---	---	---	68.964	---	---	---
2020-09-01	10:29:36	8648.41	8red	292.24	---	---	---	20.382	---	---	---	1021.54	40.605	20.382	---	---	20.965	---	---	---	105.475	---	---	---	68.193	---	---	---
2020-09-01	10:29:37	8649.4	8red	292.35	---	---	---	20.375	---	---	---	1021.59	40.595	20.375	---	---	20.963	---	---	---	105.482	---	---	---	69.362	---	---	---
2020-09-01	10:29:38	8650.41	8red	292.43	---	---	---	20.372	---	---	---	1021.58	40.615	20.372	---	---	20.961	---	---	---	105.483	---	---	---	70.309	---	---	---
2020-09-01	10:29:39	8651.4	8red	292.49	---	---	---	20.37	---	---	---	1021.6	40.638	20.37	---	---	20.959	---	---	---	105.483	---	---	---	71.341	---	---	---
2020-09-01	10:29:40	8652.41	8red	292.56	---	---	---	20.372	---	---	---	1021.57	40.681	20.372	---	---	20.956	---	---	---	105.461	---	---	---	72.057	---	---	---
2020-09-01	10:29:41	8653.41	8red	292.37	---	---	---	20.368	---	---	---	1021.57	40.75	20.368	---	---	20.965	---	---	---	105.448	---	---	---	70.786	---	---	---
2020-09-01	10:29:42	8654.41	8red	292.54	---	---	---	20.362	---	---	---	1021.57	40.77	20.362	---	---	20.96	---	---	---	105.43	---	---	---	70.579	---	---	---
2020-09-01	10:29:43	8655.41	8red	292.46	---	---	---	20.356	---	---	---	1021.57	40.727	20.356	---	---	20.965	---	---	---	105.426	---	---	---	68.694	---	---	---
2020-09-01	10:29:44	8656.41	8red	292.65	---	---	---	20.356	---	---	---	1021.59	40.659	20.356	---	---	20.958	---	---	---	105.431	---	---	---	69.404	---	---	---
2020-09-01	10:29:45	8657.41	8red	292.58	---	---	---	20.356	---	---	---	1021.62	40.671	20.356	---	---	20.961	---	---	---	105.453	---	---	---	69.282	---	---	---
2020-09-01	12:32:49	16041.1	8red	254.43	---	---	---	20.426	---	---	---	1021.2	34.298	20.426	---	---	22.504	---	---	---	111.557	---	---	---	32.79	---	---	---
2020-09-01	12:32:50	16042.1	8red	255.74	---	---	---	20.421	---	---	---	1021.19	34.817	20.421	---	---	22.448	---	---	---	111.349	---	---	---	29.694	---	---	---
2020-09-01	12:32:51	16043.1	8red	256.8	---	---	---	20.417	---	---	---	1021.19	35.349	20.417	---	---	22.402	---	---	---	111.171	---	---	---	26.483	---	---	---
2020-09-01	12:32:52	16044.1	8red	255.61	---	---	---	20.417	---	---	---	1021.24	35.349	20.417	---	---	22.455	---	---	---	111.499	---	---	---	26.469	---	---	---
2020-09-01	12:32:53	16045.1	8red	254.34	---	---	---	20.416	---	---	---	1021.27	35.326	20.416	---	---	22.512	---	---	---	111.78	---	---	---	26.344	---	---	---
2020-09-01	12:32:54	16046.1	8red	253.35	---	---	---	20.415	---	---	---	1021.3	35.29	20.415	---	---	22.556	---	---	---	112.002	---	---	---	26.259	---	---	---
2020-09-01	12:32:55	16047.1	8red	252.47	---	---	---	20.418	---	---	---	1021.24	35.257	20.418	---	---	22.595	---	---	---	112.196	---	---	---	26.217	---	---	---
2020-09-01	12:32:56	16048.1	8red	252.02	---	---	---	20.42	---	---	---	1021.24	35.246	20.42	---	---	22.614	---	---	---	112.387	---	---	---	26.214	---	---	---
2020-09-01	12:32:57	16049.1	8red	251.49	---	---	---	20.424	---	---	---	1021.2	35.246	20.424	---	---	22.637	---	---	---	112.565	---	---	---	26.215	---	---	---
2020-09-01	12:32:58	16050.1	8red	251.03	---	---	---	20.428	---	---	---	1021.24	35.269	20.428	---	---	22.656	---	---	---	112.72	---	---	---	26.175	---	---	---
2020-09-01	12:32:59	16051.1	8red	250.56	---	---	---	20.431	---	---	---	1021.19	35.292	20.431	---	---	22.677	---	---	---	112.864	---	---	---	26.251	---	---	---
2020-09-01	12:33:00	16052.1	8red	250.21	---	---	---	20.432	---	---	---	1021.19	35.305	20.432	---	---	22.692	---	---	---	112.984	---	---	---	26.55	---	---	---
2020-09-01	12:33:01	16053.1	8red	249.68	---	---	---	20.432	---	---	---	1021.16	35.305	20.432	---	---	22.716	---	---	---	113.111	---	---	---	26.734	---	---	---
2020-09-01	12:33:02	16054.1	8red	249.32	---	---	---	20.432	---	---	---	1021.18	35.328	20.432	---	---	22.733	---	---	---	113.198	---	---	---	26.96	---	---	---
2020-09-01	12:33:03	16055.1	8red	249.06	---	---	---	20.433	---	---	---	1021.2	35.351	20.433	---	---	22.745	---	---	---	113.307	---	---	---	26.767	---	---	---
2020-09-01	12:33:04	16056.1	8red	248.84	---	---	---	20.434	---	---	---	1021.22	35.374	20.434	---	---	22.754	---	---	---	113.395	---	---	---	26.696	---	---	---
2020-09-01	12:33:05	16057.1	8red	248.46	---	---	---	20.432	---	---	---	1021.23	35.374	20.432	---	---	22.772	---	---	---	113.492	---	---	---	26.492	---	---	---
2020-09-01	12:33:06	16058.1	8red	248.11	---	---	---	20.432	---	---	---	1021.22	35.374	20.432	---	---	22.789	---	---	---	113.58	---	---	---	26.487	---	---	---
2020-09-01	12:33:07	16059.1	8red	247.7	---	---	---	20.431	---	---	---	1021.22	35.384	20.431	---	---	22.808	---	---	---	113.676	---	---	---	26.446	---	---	---
2020-09-01	12:33:08	16060.1	8red	247.37	---	---	---	20.432	---	---	---	1021.25	35.394	20.432	---	---	22.823	---	---	---	113.757	---	---	---	26.426	---	---	---
2020-09-01	12:33:09	16061.1	8red	247.29	---	---	---	20.432	---	---	---	1021.31	35.394	20.432	---	---	22.827	---	---	---	113.837	---	---	---	26.355	---	---	---
2020-09-01	12:33:10	16062.1	8red	247.05	---	---	---	20.432	---	---	---	1021.27	35.404	20.432	---	---	22.838	---	---	---	113.9	---	---	---	26.537	---	---	---
2020-09-01	12:33:11	16063.1	8red	246.88	---	---	---	20.432	---	---	---	1021.25	35.427	20.432	---	---	22.846	---	---	---	113.953	---	---	---	26.785	---	---	---
2020-09-01	12:33:12	16064.1	8red	246.41	---	---	---	20.432	---	---	---	1021.21	35.448	20.432	---	---	22.868	---	---	---	114.004	---	---	---	27.15	---	---	---
2020-09-01	12:33:13	16065.1	8red	246.49	---	---	---	20.432	---	---	---	1021.22	35.415	20.432	---	---	22.864	---	---	---	114.067	---	---	---	27.478	---	---	---
2020-09-01	12:33:14	16066.1	8red	246.28	---	---	---	20.432	---	---	---	1021.19	35.346	20.432	---	---	22.874	---	---	---	114.124	---	---	---	27.827	---	---	---
2020-09-01	12:33:15	16067.1	8red	246.11	---	---	---	20.433	---	---	---	1021.21	35.257	20.433	---	---	22.881	---	---	---	114.197	---	---	---	28.008	---	---	---
2020-09-01	12:33:16	16068.1	8red	245.82	---	---	---	20.435	---	---	---	1021.22	35.181	20.435	---	---	22.894	---	---	---	114.244	---	---	---	28.082	---	---	---
2020-09-01	12:33:17	16069.1	8red	245.81	---	---	---	20.434	---	---	---	1021.21	35.115	20.434	---	---	22.895	---	---	---	114.315	---	---	---	27.972	---	---	---
2020-09-01	12:33:18	16070.1	8red	245.82	---	---	---	20.435	---	---	---	1021.21	35.059	20.435	---	---	22.894	---	---	---	114.361	---	---	---	27.999	---	---	---
2020-09-01	12:33:19	16071.1	8red	245.9	---	---	---	20.433	---	---	---	1021.21	35.023	20.433	---	---	22.891	---	---	---	114.399	---	---	---	28.032	---	---	---
2020-09-01	12:33:20	16072.1	8red	245.71	---	---	---	20.436	---	---	---	1021.22	34.99	20.436	---	---	22.899	---	---	---	114.42	---	---	---	28.04	---	---	---
2020-09-01	12:33:21	16073.1	8red	245.72	---	---	---	20.434	---	---	---	1021.2	34.969	20.434	---	---	22.899	---	---	---	114.444	---	---	---	28.043	---	---	---
2020-09-01	12:33:22	16074.1	8red	245.59	---	---	---	20.436	---	---	---	1021.22	34.949	20.436	---	---	22.905	---	---	---	114.474	---	---	---	28.047	---	---	---
2020-09-01	12:33:23	16075.1	8red	245.66	---	---	---	20.435	---	---	---	1021.23	34.939	20.435	---	---	22.902	---	---	---	114.503	---	---	---	28.111	---	---	---
2020-09-01	12:33:24	16076.1	8red	245.64	---	---	---	20.436	---	---	---	1021.22	34.939	20.436	---	---	22.903	---	---	---	114.501	---	---	---	28.299	---	---	---
2020-09-01	12:33:25	16077.1	8red	245.54	---	---	---	20.435	---	---	---	1021.22	34.926	20.435	---	---	22.907	---	---	---	114.509	---	---	---	28.266	---	---	---
2020-09-01	12:33:26	16078.1	8red	245.51	---	---	---	20.434	---	---	---	1021.23	34.926	20.434	---	---	22.909	---	---	---	114.536	---	---	---	28.229	---	---	---
2020-09-01	12:33:27	16079.1	8red	245.36	---	---	---	20.435	---	---	---	1021.24	34.936	20.435	---	---	22.916	---	---	---	114.569	---	---	---	28.019	---	---	---
2020-09-01	12:33:28	16080.1	8red	245.38	---	---	---	20.435	---	---	---	1021.25	34.969	20.435	---	---	22.915	---	---	---	114.602	---	---	---	28.024	---	---	---
2020-09-01	12:33:29	16081.1	8red	245.41	---	---	---	20.435	---	---	---	1021.25	34.979	20.435	---	---	22.913	---	---	---	114.613	---	---	---	28.017	---	---	---
2020-09-01	12:33:30	16082.1	8red	245.45	---	---	---	20.436	---	---	---	1021.25	34.969	20.436	---	---	22.911	---	---	---	114.635	---	---	---	28.007	---	---	---
2020-09-01	12:33:31	16083.1	8red	245.42	---	---	---	20.436	---	---	---	1021.24	34.936	20.436	---	---	22.912	---	---	---	114.625	---	---	---	27.908	---	---	---
2020-09-01	12:33:32	16084.1	8red	245.36	---	---	---	20.437	---	---	---	1021.22	34.914	20.437	---	---	22.915	---	---	---	114.629	---	---	---	27.885	---	---	---
2020-09-01	12:33:33	16085.1	8red	245.42	---	---	---	20.436	---	---	---	1021.22	34.881	20.436	---	---	22.913	---	---	---	114.63	---	---	---	27.912	---	---	---
2020-09-01	15:05:43	25214.9	8red	195.95	---	---	---	20.38	---	---	---	1021.16	34.979	20.38	---	---	25.576	---	---	---	123.333	---	---	---	16.667	---	---	---
2020-09-01	15:05:44	25215.9	8red	192.97	---	---	---	20.383	---	---	---	1021.12	35.051	20.383	---	---	25.758	---	---	---	124.474	---	---	---	15.056	---	---	---
2020-09-01	15:05:45	25216.9	8red	189.89	---	---	---	20.387	---	---	---	1021.11	35.099	20.387	---	---	25.945	---	---	---	125.608	---	---	---	14.135	---	---	---
2020-09-01	15:05:46	25217.9	8red	189.68	---	---	---	20.39	---	---	---	1021.08	35.099	20.39	---	---	25.958	---	---	---	125.712	---	---	---	14.235	---	---	---
2020-09-01	15:05:47	25218.9	8red	189.48	---	---	---	20.389	---	---	---	1021.11	35.122	20.389	---	---	25.97	---	---	---	125.819	---	---	---	14.377	---	---	---
2020-09-01	15:05:48	25219.9	8red	189.28	---	---	---	20.387	---	---	---	1021.12	35.155	20.387	---	---	25.984	---	---	---	125.939	---	---	---	14.323	---	---	---
2020-09-01	15:05:49	25220.9	8red	189	---	---	---	20.387	---	---	---	1021.09	35.211	20.387	---	---	26.002	---	---	---	126.044	---	---	---	14.375	---	---	---
2020-09-01	15:05:50	25221.9	8red	188.7	---	---	---	20.388	---	---	---	1021.08	35.249	20.388	---	---	26.021	---	---	---	126.153	---	---	---	14.378	---	---	---
2020-09-01	15:05:51	25222.9	8red	188.32	---	---	---	20.389	---	---	---	1021.03	35.287	20.389	---	---	26.044	---	---	---	126.257	---	---	---	14.531	---	---	---
2020-09-01	15:05:52	25223.9	8red	188.01	---	---	---	20.388	---	---	---	1021.05	35.303	20.388	---	---	26.065	---	---	---	126.362	---	---	---	14.437	---	---	---
2020-09-01	15:05:53	25224.9	8red	187.75	---	---	---	20.387	---	---	---	1021.04	35.326	20.387	---	---	26.082	---	---	---	126.467	---	---	---	14.39	---	---	---
2020-09-01	15:05:54	25225.9	8red	187.6	---	---	---	20.387	---	---	---	1021.05	35.348	20.387	---	---	26.091	---	---	---	126.558	---	---	---	14.261	---	---	---
2020-09-01	15:05:55	25226.9	8red	187.38	---	---	---	20.386	---	---	---	1021.04	35.371	20.386	---	---	26.106	---	---	---	126.672	---	---	---	14.272	---	---	---
2020-09-01	15:05:56	25227.9	8red	187.28	---	---	---	20.382	---	---	---	1021.06	35.371	20.382	---	---	26.114	---	---	---	126.759	---	---	---	14.18	---	---	---
2020-09-01	15:05:57	25228.9	8red	186.92	---	---	---	20.382	---	---	---	1021.08	35.361	20.382	---	---	26.137	---	---	---	126.861	---	---	---	14.261	---	---	---
2020-09-01	15:05:58	25229.9	8red	186.61	---	---	---	20.38	---	---	---	1021.13	35.351	20.38	---	---	26.157	---	---	---	126.935	---	---	---	14.214	---	---	---
2020-09-01	15:05:59	25230.9	8red	186.21	---	---	---	20.383	---	---	---	1021.12	35.361	20.383	---	---	26.182	---	---	---	127.014	---	---	---	14.308	---	---	---
2020-09-01	15:06:00	25231.9	8red	186.07	---	---	---	20.385	---	---	---	1021.11	35.381	20.385	---	---	26.19	---	---	---	127.091	---	---	---	14.188	---	---	---
2020-09-01	15:06:01	25232.9	8red	185.84	---	---	---	20.386	---	---	---	1021.08	35.402	20.386	---	---	26.205	---	---	---	127.164	---	---	---	14.263	---	---	---
2020-09-01	15:06:02	25233.9	8red	185.61	---	---	---	20.387	---	---	---	1021.09	35.402	20.387	---	---	26.219	---	---	---	127.241	---	---	---	14.283	---	---	---
2020-09-01	15:06:03	25234.9	8red	185.42	---	---	---	20.386	---	---	---	1021.1	35.381	20.386	---	---	26.232	---	---	---	127.334	---	---	---	14.386	---	---	---
2020-09-01	15:06:04	25235.9	8red	185.39	---	---	---	20.388	---	---	---	1021.09	35.348	20.388	---	---	26.233	---	---	---	127.412	---	---	---	14.421	---	---	---
2020-09-01	15:06:05	25236.9	8red	185.43	---	---	---	20.39	---	---	---	1021.1	35.315	20.39	---	---	26.23	---	---	---	127.491	---	---	---	14.34	---	---	---
2020-09-01	15:06:06	25237.9	8red	185.2	---	---	---	20.39	---	---	---	1021.13	35.292	20.39	---	---	26.245	---	---	---	127.534	---	---	---	14.339	---	---	---
2020-09-01	15:06:07	25238.9	8red	185.09	---	---	---	20.39	---	---	---	1021.13	35.292	20.39	---	---	26.252	---	---	---	127.601	---	---	---	14.288	---	---	---
2020-09-01	15:06:08	25239.9	8red	184.84	---	---	---	20.39	---	---	---	1021.13	35.315	20.39	---	---	26.268	---	---	---	127.644	---	---	---	14.321	---	---	---
2020-09-01	10:27:41	8533.46	8white	293.3	---	---	---	20.401	---	---	---	1021.58	42.25	20.401	---	---	20.92	---	---	---	106.149	---	---	---	39.027	---	---	---
2020-09-01	10:27:42	8534.46	8white	290.16	---	---	---	20.387	---	---	---	1021.61	41.757	20.387	---	---	21.044	---	---	---	106.503	---	---	---	30.99	---	---	---
2020-09-01	10:27:43	8535.46	8white	286.64	---	---	---	20.38	---	---	---	1021.63	41.35	20.38	---	---	21.18	---	---	---	106.933	---	---	---	23.158	---	---	---
2020-09-01	10:27:44	8536.46	8white	286.54	---	---	---	20.388	---	---	---	1021.6	41.406	20.388	---	---	21.181	---	---	---	106.928	---	---	---	23.162	---	---	---
2020-09-01	10:27:45	8537.46	8white	286.59	---	---	---	20.396	---	---	---	1021.61	41.449	20.396	---	---	21.176	---	---	---	106.929	---	---	---	23.167	---	---	---
2020-09-01	10:27:46	8538.46	8white	286.54	---	---	---	20.397	---	---	---	1021.61	41.472	20.397	---	---	21.178	---	---	---	106.936	---	---	---	23.155	---	---	---
2020-09-01	10:27:47	8539.46	8white	286.51	---	---	---	20.399	---	---	---	1021.63	41.505	20.399	---	---	21.178	---	---	---	106.965	---	---	---	23.149	---	---	---
2020-09-01	10:27:48	8540.46	8white	286.47	---	---	---	20.399	---	---	---	1021.63	41.551	20.399	---	---	21.18	---	---	---	106.982	---	---	---	23.148	---	---	---
2020-09-01	10:27:49	8541.46	8white	286.59	---	---	---	20.401	---	---	---	1021.62	41.617	20.401	---	---	21.175	---	---	---	106.939	---	---	---	23.172	---	---	---
2020-09-01	10:27:50	8542.46	8white	286.57	---	---	---	20.402	---	---	---	1021.6	41.607	20.402	---	---	21.175	---	---	---	106.902	---	---	---	23.173	---	---	---
2020-09-01	10:27:51	8543.46	8white	286.64	---	---	---	20.404	---	---	---	1021.57	41.495	20.404	---	---	21.172	---	---	---	106.9	---	---	---	23.242	---	---	---
2020-09-01	10:27:52	8544.46	8white	286.55	---	---	---	20.405	---	---	---	1021.58	41.261	20.405	---	---	21.175	---	---	---	106.91	---	---	---	23.296	---	---	---
2020-09-01	10:27:53	8545.46	8white	286.54	---	---	---	20.407	---	---	---	1021.58	41.07	20.407	---	---	21.175	---	---	---	106.93	---	---	---	23.33	---	---	---
2020-09-01	10:27:54	8546.46	8white	286.62	---	---	---	20.407	---	---	---	1021.57	40.968	20.407	---	---	21.171	---	---	---	106.904	---	---	---	23.346	---	---	---
2020-09-01	12:31:51	15982.6	8white	264.55	---	---	---	20.426	---	---	---	1021.32	33.934	20.426	---	---	22.067	---	---	---	107.965	---	---	---	17.992	---	---	---
2020-09-01	12:31:52	15983.6	8white	258.59	---	---	---	20.425	---	---	---	1021.26	34.1	20.425	---	---	22.326	---	---	---	109.798	---	---	---	27.148	---	---	---
2020-09-01	12:31:53	15984.6	8white	252.86	---	---	---	20.427	---	---	---	1021.21	34.224	20.427	---	---	22.574	---	---	---	111.619	---	---	---	36.229	---	---	---
2020-09-01	12:31:54	15985.6	8white	252.96	---	---	---	20.429	---	---	---	1021.2	34.201	20.429	---	---	22.569	---	---	---	111.592	---	---	---	36.287	---	---	---
2020-09-01	12:31:55	15986.6	8white	256.38	---	---	---	20.432	---	---	---	1021.23	34.156	20.432	---	---	22.417	---	---	---	110.75	---	---	---	36.196	---	---	---
2020-09-01	12:31:56	15987.6	8white	260.92	---	---	---	20.432	---	---	---	1021.26	34.112	20.432	---	---	22.218	---	---	---	109.541	---	---	---	36.104	---	---	---
2020-09-01	12:31:57	15988.6	8white	262.44	---	---	---	20.432	---	---	---	1021.28	34.079	20.432	---	---	22.151	---	---	---	109.11	---	---	---	36.127	---	---	---
2020-09-01	12:31:58	15989.6	8white	260.44	---	---	---	20.432	---	---	---	1021.29	34.079	20.432	---	---	22.238	---	---	---	109.609	---	---	---	36.193	---	---	---
2020-09-01	12:31:59	15990.6	8white	259.24	---	---	---	20.432	---	---	---	1021.3	34.102	20.432	---	---	22.289	---	---	---	109.983	---	---	---	36.152	---	---	---
2020-09-01	12:32:00	15991.6	8white	263.71	---	---	---	20.43	---	---	---	1021.28	34.135	20.43	---	---	22.099	---	---	---	108.922	---	---	---	35.963	---	---	---
2020-09-01	12:32:01	15992.6	8white	269.09	---	---	---	20.43	---	---	---	1021.27	34.158	20.43	---	---	21.87	---	---	---	107.645	---	---	---	35.636	---	---	---
2020-09-01	12:32:02	15993.6	8white	271.25	---	---	---	20.432	---	---	---	1021.27	34.168	20.432	---	---	21.778	---	---	---	107.06	---	---	---	35.469	---	---	---
2020-09-01	12:32:03	15994.6	8white	265.84	---	---	---	20.433	---	---	---	1021.24	34.168	20.433	---	---	22.01	---	---	---	108.396	---	---	---	35.485	---	---	---
2020-09-01	12:32:04	15995.6	8white	258.89	---	---	---	20.435	---	---	---	1021.25	34.168	20.435	---	---	22.309	---	---	---	110.13	---	---	---	35.675	---	---	---
2020-09-01	12:32:05	15996.6	8white	253.49	---	---	---	20.433	---	---	---	1021.25	34.145	20.433	---	---	22.543	---	---	---	111.561	---	---	---	35.958	---	---	---
2020-09-01	12:32:06	15997.6	8white	252.45	---	---	---	20.435	---	---	---	1021.26	34.079	20.435	---	---	22.59	---	---	---	111.848	---	---	---	36.08	---	---	---
2020-09-01	12:32:07	15998.6	8white	252.32	---	---	---	20.434	---	---	---	1021.25	34.013	20.434	---	---	22.596	---	---	---	111.856	---	---	---	36.125	---	---	---
2020-09-01	12:32:08	15999.6	8white	252.24	---	---	---	20.433	---	---	---	1021.23	33.97	20.433	---	---	22.6	---	---	---	111.905	---	---	---	36.145	---	---	---
2020-09-01	12:32:09	16000.6	8white	252.47	---	---	---	20.433	---	---	---	1021.23	33.957	20.433	---	---	22.589	---	---	---	111.859	---	---	---	36.197	---	---	---
2020-09-01	12:32:10	16001.6	8white	252.89	---	---	---	20.433	---	---	---	1021.21	33.922	20.433	---	---	22.571	---	---	---	111.787	---	---	---	35.961	---	---	---
2020-09-01	12:32:11	16002.6	8white	252.83	---	---	---	20.437	---	---	---	1021.24	33.873	20.437	---	---	22.572	---	---	---	111.801	---	---	---	35.911	---	---	---
2020-09-01	12:32:12	16003.6	8white	252.92	---	---	---	20.436	---	---	---	1021.24	33.822	20.436	---	---	22.568	---	---	---	111.802	---	---	---	35.846	---	---	---
2020-09-01	12:32:13	16004.6	8white	252.68	---	---	---	20.435	---	---	---	1021.24	33.794	20.435	---	---	22.58	---	---	---	111.893	---	---	---	36.057	---	---	---
2020-09-01	15:06:45	25276.9	8white	194.34	---	---	---	20.39	---	---	---	1021.15	35.715	20.39	---	---	25.699	---	---	---	124.631	---	---	---	16.476	---	---	---
2020-09-01	15:06:46	25277.9	8white	203.72	---	---	---	20.39	---	---	---	1021.17	36.104	20.39	---	---	25.137	---	---	---	121.644	---	---	---	18.645	---	---	---
2020-09-01	15:06:47	25278.9	8white	212.96	---	---	---	20.391	---	---	---	1021.18	36.493	20.391	---	---	24.581	---	---	---	118.679	---	---	---	20.711	---	---	---
2020-09-01	15:06:48	25279.9	8white	212.64	---	---	---	20.394	---	---	---	1021.16	36.549	20.394	---	---	24.598	---	---	---	118.774	---	---	---	20.605	---	---	---
2020-09-01	15:06:49	25280.9	8white	212.45	---	---	---	20.396	---	---	---	1021.17	36.638	20.396	---	---	24.608	---	---	---	118.833	---	---	---	20.546	---	---	---
2020-09-01	15:06:50	25281.9	8white	212.26	---	---	---	20.398	---	---	---	1021.16	36.737	20.398	---	---	24.618	---	---	---	118.881	---	---	---	20.628	---	---	---
2020-09-01	15:06:51	25282.9	8white	212.03	---	---	---	20.398	---	---	---	1021.15	36.77	20.398	---	---	24.631	---	---	---	118.929	---	---	---	20.726	---	---	---
2020-09-01	15:06:52	25283.9	8white	211.66	---	---	---	20.401	---	---	---	1021.16	36.75	20.401	---	---	24.65	---	---	---	118.994	---	---	---	20.725	---	---	---
2020-09-01	15:06:53	25284.9	8white	211.58	---	---	---	20.396	---	---	---	1021.15	36.694	20.396	---	---	24.656	---	---	---	119.036	---	---	---	20.919	---	---	---
2020-09-01	15:06:54	25285.9	8white	211.73	---	---	---	20.394	---	---	---	1021.14	36.65	20.394	---	---	24.649	---	---	---	119.049	---	---	---	20.963	---	---	---
2020-09-01	15:06:55	25286.9	8white	211.95	---	---	---	20.393	---	---	---	1021.14	36.627	20.393	---	---	24.636	---	---	---	119.027	---	---	---	21.194	---	---	---
2020-09-01	15:06:56	25287.9	8white	212.23	---	---	---	20.398	---	---	---	1021.18	36.594	20.398	---	---	24.618	---	---	---	118.992	---	---	---	21.123	---	---	---
2020-09-01	15:06:57	25288.9	8white	212.18	---	---	---	20.403	---	---	---	1021.18	36.561	20.403	---	---	24.62	---	---	---	118.989	---	---	---	20.918	---	---	---
2020-09-01	15:06:58	25289.9	8white	212.14	---	---	---	20.405	---	---	---	1021.17	36.516	20.405	---	---	24.622	---	---	---	118.967	---	---	---	20.759	---	---	---
2020-09-01	15:06:59	25290.9	8white	212.42	---	---	---	20.406	---	---	---	1021.15	36.472	20.406	---	---	24.606	---	---	---	118.862	---	---	---	20.625	---	---	---
2020-09-01	10:30:38	8710.2	8yellow	291.32	---	---	---	20.37	---	---	---	1021.66	40.908	20.37	---	---	21.004	---	---	---	105.803	---	---	---	61.851	---	---	---
2020-09-01	10:30:39	8711.2	8yellow	289.84	---	---	---	20.386	---	---	---	1021.65	41.101	20.386	---	---	21.055	---	---	---	106.125	---	---	---	54.066	---	---	---
2020-09-01	10:30:40	8712.2	8yellow	288.53	---	---	---	20.403	---	---	---	1021.63	41.238	20.403	---	---	21.099	---	---	---	106.434	---	---	---	45.797	---	---	---
2020-09-01	10:30:41	8713.2	8yellow	288.35	---	---	---	20.406	---	---	---	1021.6	41.195	20.406	---	---	21.105	---	---	---	106.455	---	---	---	47.03	---	---	---
2020-09-01	10:30:42	8714.2	8yellow	288.44	---	---	---	20.405	---	---	---	1021.61	41.139	20.405	---	---	21.102	---	---	---	106.433	---	---	---	47.115	---	---	---
2020-09-01	10:30:43	8715.2	8yellow	288.32	---	---	---	20.402	---	---	---	1021.61	41.06	20.402	---	---	21.107	---	---	---	106.417	---	---	---	47.532	---	---	---
2020-09-01	10:30:44	8716.2	8yellow	288.79	---	---	---	20.398	---	---	---	1021.59	40.948	20.398	---	---	21.091	---	---	---	106.362	---	---	---	47.626	---	---	---
2020-09-01	10:30:45	8717.2	8yellow	288.94	---	---	---	20.393	---	---	---	1021.55	40.849	20.393	---	---	21.087	---	---	---	106.364	---	---	---	47.336	---	---	---
2020-09-01	10:30:46	8718.2	8yellow	289.34	---	---	---	20.388	---	---	---	1021.54	40.76	20.388	---	---	21.073	---	---	---	106.349	---	---	---	47.854	---	---	---
2020-09-01	10:30:47	8719.2	8yellow	289.21	---	---	---	20.383	---	---	---	1021.55	40.724	20.383	---	---	21.08	---	---	---	106.346	---	---	---	47.384	---	---	---
2020-09-01	10:30:48	8720.2	8yellow	289.24	---	---	---	20.377	---	---	---	1021.58	40.747	20.377	---	---	21.081	---	---	---	106.331	---	---	---	47.366	---	---	---
2020-09-01	10:30:49	8721.2	8yellow	289.34	---	---	---	20.371	---	---	---	1021.59	40.836	20.371	---	---	21.079	---	---	---	106.326	---	---	---	46.687	---	---	---
2020-09-01	10:30:50	8722.2	8yellow	289.62	---	---	---	20.361	---	---	---	1021.62	40.928	20.361	---	---	21.072	---	---	---	106.316	---	---	---	46.931	---	---	---
2020-09-01	10:30:51	8723.2	8yellow	289.75	---	---	---	20.351	---	---	---	1021.63	41.017	20.351	---	---	21.07	---	---	---	106.298	---	---	---	47.17	---	---	---
2020-09-01	10:30:52	8724.2	8yellow	289.73	---	---	---	20.341	---	---	---	1021.63	41.106	20.341	---	---	21.074	---	---	---	106.288	---	---	---	47.831	---	---	---
2020-09-01	10:30:53	8725.2	8yellow	289.68	---	---	---	20.335	---	---	---	1021.65	41.215	20.335	---	---	21.078	---	---	---	106.267	---	---	---	47.44	---	---	---
2020-09-01	10:30:54	8726.2	8yellow	289.74	---	---	---	20.331	---	---	---	1021.66	41.314	20.331	---	---	21.077	---	---	---	106.248	---	---	---	47.341	---	---	---
2020-09-01	10:30:55	8727.2	8yellow	289.82	---	---	---	20.333	---	---	---	1021.65	41.393	20.333	---	---	21.073	---	---	---	106.195	---	---	---	46.977	---	---	---
2020-09-01	10:30:56	8728.2	8yellow	289.88	---	---	---	20.334	---	---	---	1021.61	41.462	20.334	---	---	21.071	---	---	---	106.165	---	---	---	46.797	---	---	---
2020-09-01	12:34:10	16121.9	8yellow	248.97	---	---	---	20.43	---	---	---	1021.22	34.86	20.43	---	---	22.753	---	---	---	113.781	---	---	---	27.207	---	---	---
2020-09-01	12:34:11	16122.9	8yellow	252.4	---	---	---	20.427	---	---	---	1021.22	34.85	20.427	---	---	22.597	---	---	---	112.938	---	---	---	26.581	---	---	---
2020-09-01	12:34:12	16123.9	8yellow	255.77	---	---	---	20.425	---	---	---	1021.24	34.86	20.425	---	---	22.444	---	---	---	112.13	---	---	---	25.804	---	---	---
2020-09-01	12:34:13	16124.9	8yellow	255.56	---	---	---	20.428	---	---	---	1021.22	34.87	20.428	---	---	22.452	---	---	---	112.188	---	---	---	25.806	---	---	---
2020-09-01	12:34:14	16125.9	8yellow	255.36	---	---	---	20.427	---	---	---	1021.21	34.88	20.427	---	---	22.462	---	---	---	112.23	---	---	---	25.724	---	---	---
2020-09-01	12:34:15	16126.9	8yellow	255.32	---	---	---	20.428	---	---	---	1021.16	34.891	20.428	---	---	22.463	---	---	---	112.234	---	---	---	25.914	---	---	---
2020-09-01	12:34:16	16127.9	8yellow	255.31	---	---	---	20.427	---	---	---	1021.15	34.901	20.427	---	---	22.464	---	---	---	112.224	---	---	---	26.239	---	---	---
2020-09-01	12:34:17	16128.9	8yellow	255.47	---	---	---	20.428	---	---	---	1021.21	34.914	20.428	---	---	22.456	---	---	---	112.196	---	---	---	26.311	---	---	---
2020-09-01	12:34:18	16129.9	8yellow	255.56	---	---	---	20.426	---	---	---	1021.2	34.926	20.426	---	---	22.453	---	---	---	112.142	---	---	---	26.197	---	---	---
2020-09-01	12:34:19	16130.9	8yellow	256	---	---	---	20.425	---	---	---	1021.22	34.959	20.425	---	---	22.434	---	---	---	112.028	---	---	---	25.708	---	---	---
2020-09-01	12:34:20	16131.9	8yellow	256.74	---	---	---	20.425	---	---	---	1021.18	34.98	20.425	---	---	22.401	---	---	---	111.86	---	---	---	25.383	---	---	---
2020-09-01	12:34:21	16132.9	8yellow	257.51	---	---	---	20.427	---	---	---	1021.2	35.023	20.427	---	---	22.366	---	---	---	111.656	---	---	---	25.118	---	---	---
2020-09-01	12:34:22	16133.9	8yellow	258.09	---	---	---	20.43	---	---	---	1021.2	35.069	20.43	---	---	22.34	---	---	---	111.53	---	---	---	25.068	---	---	---
2020-09-01	12:34:23	16134.9	8yellow	258.27	---	---	---	20.429	---	---	---	1021.23	35.125	20.429	---	---	22.332	---	---	---	111.474	---	---	---	25.223	---	---	---
2020-09-01	12:34:24	16135.9	8yellow	258.11	---	---	---	20.43	---	---	---	1021.25	35.17	20.43	---	---	22.339	---	---	---	111.543	---	---	---	25.196	---	---	---
2020-09-01	12:34:25	16136.9	8yellow	257.69	---	---	---	20.431	---	---	---	1021.25	35.193	20.431	---	---	22.357	---	---	---	111.646	---	---	---	25.156	---	---	---
2020-09-01	12:34:26	16137.9	8yellow	257.17	---	---	---	20.432	---	---	---	1021.23	35.206	20.432	---	---	22.379	---	---	---	111.783	---	---	---	24.959	---	---	---
2020-09-01	12:34:27	16138.9	8yellow	256.76	---	---	---	20.432	---	---	---	1021.21	35.193	20.432	---	---	22.397	---	---	---	111.89	---	---	---	25.082	---	---	---
2020-09-01	12:34:28	16139.9	8yellow	256.34	---	---	---	20.43	---	---	---	1021.19	35.17	20.43	---	---	22.417	---	---	---	111.995	---	---	---	25.128	---	---	---
2020-09-01	12:34:29	16140.9	8yellow	256.1	---	---	---	20.429	---	---	---	1021.18	35.125	20.429	---	---	22.428	---	---	---	112.08	---	---	---	25.126	---	---	---
2020-09-01	12:34:30	16141.9	8yellow	255.89	---	---	---	20.423	---	---	---	1021.18	35.081	20.423	---	---	22.439	---	---	---	112.167	---	---	---	25.252	---	---	---
2020-09-01	12:34:31	16142.9	8yellow	255.75	---	---	---	20.417	---	---	---	1021.22	35.048	20.417	---	---	22.448	---	---	---	112.236	---	---	---	25.417	---	---	---
2020-09-01	12:34:32	16143.9	8yellow	255.58	---	---	---	20.411	---	---	---	1021.22	35.038	20.411	---	---	22.457	---	---	---	112.294	---	---	---	25.631	---	---	---
2020-09-01	15:04:58	25169.6	8yellow	227.15	---	---	---	20.412	---	---	---	1021.22	34.351	20.412	---	---	23.88	---	---	---	113.437	---	---	---	18.112	---	---	---
2020-09-01	15:04:59	25170.6	8yellow	211.73	---	---	---	20.39	---	---	---	1021.19	34.537	20.39	---	---	24.718	---	---	---	118.199	---	---	---	18.106	---	---	---
2020-09-01	15:05:00	25171.6	8yellow	196.73	---	---	---	20.375	---	---	---	1021.16	34.735	20.375	---	---	25.528	---	---	---	122.831	---	---	---	18.197	---	---	---
2020-09-01	15:05:01	25172.6	8yellow	197	---	---	---	20.381	---	---	---	1021.1	34.791	20.381	---	---	25.509	---	---	---	122.737	---	---	---	19.423	---	---	---
2020-09-01	15:05:02	25173.6	8yellow	198.04	---	---	---	20.385	---	---	---	1021.09	34.847	20.385	---	---	25.445	---	---	---	122.452	---	---	---	18.212	---	---	---
2020-09-01	15:05:03	25174.6	8yellow	198.8	---	---	---	20.387	---	---	---	1021.1	34.88	20.387	---	---	25.398	---	---	---	122.199	---	---	---	17.883	---	---	---
2020-09-01	15:05:04	25175.6	8yellow	199.2	---	---	---	20.389	---	---	---	1021.1	34.88	20.389	---	---	25.373	---	---	---	122.052	---	---	---	15.916	---	---	---
2020-09-01	15:05:05	25176.6	8yellow	199.3	---	---	---	20.39	---	---	---	1021.14	34.86	20.39	---	---	25.367	---	---	---	121.985	---	---	---	16.705	---	---	---
2020-09-01	15:05:06	25177.6	8yellow	199.17	---	---	---	20.393	---	---	---	1021.14	34.85	20.393	---	---	25.374	---	---	---	122.05	---	---	---	16.678	---	---	---
2020-09-01	15:05:07	25178.6	8yellow	198.95	---	---	---	20.388	---	---	---	1021.13	34.845	20.388	---	---	25.389	---	---	---	122.153	---	---	---	17.127	---	---	---
2020-09-01	15:05:08	25179.6	8yellow	198.8	---	---	---	20.385	---	---	---	1021.1	34.86	20.385	---	---	25.399	---	---	---	122.199	---	---	---	17.746	---	---	---
2020-09-01	15:05:09	25180.6	8yellow	198.78	---	---	---	20.378	---	---	---	1021.11	34.898	20.378	---	---	25.403	---	---	---	122.254	---	---	---	18.001	---	---	---
2020-09-01	09:59:55	6867.17	9blue	289.98	---	---	---	19.999	---	---	---	1021.83	54.635	19.999	---	---	21.181	---	---	---	115.663	---	---	---	42.383	---	---	---
2020-09-01	09:59:56	6868.17	9blue	290.41	---	---	---	19.999	---	---	---	1021.85	54.704	19.999	---	---	21.164	---	---	---	115.557	---	---	---	33.028	---	---	---
2020-09-01	09:59:57	6869.17	9blue	290.65	---	---	---	20	---	---	---	1021.86	54.783	20	---	---	21.155	---	---	---	115.466	---	---	---	24.524	---	---	---
2020-09-01	09:59:58	6870.17	9blue	290.7	---	---	---	20.003	---	---	---	1021.87	54.783	20.003	---	---	21.152	---	---	---	115.464	---	---	---	24.481	---	---	---
2020-09-01	09:59:59	6871.17	9blue	290.73	---	---	---	20.006	---	---	---	1021.84	54.783	20.006	---	---	21.15	---	---	---	115.449	---	---	---	24.492	---	---	---
2020-09-01	10:00:00	6872.17	9blue	290.76	---	---	---	20.007	---	---	---	1021.83	54.783	20.007	---	---	21.148	---	---	---	115.461	---	---	---	24.522	---	---	---
2020-09-01	10:00:01	6873.17	9blue	290.64	---	---	---	20.009	---	---	---	1021.82	54.773	20.009	---	---	21.152	---	---	---	115.462	---	---	---	24.525	---	---	---
2020-09-01	10:00:02	6874.17	9blue	290.6	---	---	---	20.006	---	---	---	1021.81	54.714	20.006	---	---	21.155	---	---	---	115.462	---	---	---	24.536	---	---	---
2020-09-01	10:00:03	6875.17	9blue	290.85	---	---	---	20.003	---	---	---	1021.82	54.627	20.003	---	---	21.146	---	---	---	115.465	---	---	---	24.535	---	---	---
2020-09-01	10:00:04	6876.17	9blue	290.81	---	---	---	19.999	---	---	---	1021.83	54.541	19.999	---	---	21.149	---	---	---	115.473	---	---	---	24.613	---	---	---
2020-09-01	10:00:05	6877.17	9blue	290.81	---	---	---	19.997	---	---	---	1021.83	54.493	19.997	---	---	21.15	---	---	---	115.489	---	---	---	23.913	---	---	---
2020-09-01	12:17:03	15095.2	9blue	266.69	---	---	---	20.314	---	---	---	1021.17	28.278	20.314	---	---	22.015	---	---	---	104.433	---	---	---	54.467	---	---	---
2020-09-01	12:17:04	15096.2	9blue	272.38	---	---	---	20.293	---	---	---	1021.2	27.927	20.293	---	---	21.785	---	---	---	102.554	---	---	---	68.544	---	---	---
2020-09-01	12:17:05	15097.2	9blue	278.05	---	---	---	20.276	---	---	---	1021.21	27.538	20.276	---	---	21.554	---	---	---	100.699	---	---	---	82.751	---	---	---
2020-09-01	12:17:06	15098.2	9blue	277.71	---	---	---	20.282	---	---	---	1021.18	27.576	20.282	---	---	21.565	---	---	---	100.724	---	---	---	83.918	---	---	---
2020-09-01	12:17:07	15099.2	9blue	277.6	---	---	---	20.286	---	---	---	1021.18	27.671	20.286	---	---	21.568	---	---	---	100.741	---	---	---	83.731	---	---	---
2020-09-01	12:17:08	15100.2	9blue	277.68	---	---	---	20.288	---	---	---	1021.19	27.683	20.288	---	---	21.564	---	---	---	100.752	---	---	---	84.307	---	---	---
2020-09-01	12:17:09	15101.2	9blue	277.75	---	---	---	20.294	---	---	---	1021.16	27.576	20.294	---	---	21.559	---	---	---	100.773	---	---	---	84.043	---	---	---
2020-09-01	12:17:10	15102.2	9blue	277.85	---	---	---	20.294	---	---	---	1021.17	27.347	20.294	---	---	21.556	---	---	---	100.756	---	---	---	84.381	---	---	---
2020-09-01	12:17:11	15103.2	9blue	277.65	---	---	---	20.293	---	---	---	1021.19	27.159	20.293	---	---	21.564	---	---	---	100.766	---	---	---	84.656	---	---	---
2020-09-01	12:17:12	15104.2	9blue	277.62	---	---	---	20.287	---	---	---	1021.24	27.04	20.287	---	---	21.567	---	---	---	100.773	---	---	---	85.746	---	---	---
2020-09-01	12:17:13	15105.2	9blue	277.68	---	---	---	20.282	---	---	---	1021.24	26.918	20.282	---	---	21.566	---	---	---	100.776	---	---	---	85.752	---	---	---
2020-09-01	12:17:14	15106.2	9blue	277.62	---	---	---	20.277	---	---	---	1021.25	26.798	20.277	---	---	21.571	---	---	---	100.762	---	---	---	86.084	---	---	---
2020-09-01	12:17:15	15107.2	9blue	277.72	---	---	---	20.27	---	---	---	1021.22	26.73	20.27	---	---	21.569	---	---	---	100.724	---	---	---	85.763	---	---	---
2020-09-01	12:17:16	15108.2	9blue	277.48	---	---	---	20.265	---	---	---	1021.19	26.798	20.265	---	---	21.58	---	---	---	100.721	---	---	---	84.411	---	---	---
2020-09-01	14:53:20	24471.8	9blue	223.78	---	---	---	20.31	---	---	---	1021.14	28.522	20.31	---	---	24.22	---	---	---	111.598	---	---	---	18.097	---	---	---
2020-09-01	14:53:21	24472.8	9blue	250.79	---	---	---	20.338	---	---	---	1021.12	28.596	20.338	---	---	22.876	---	---	---	104.338	---	---	---	17.324	---	---	---
2020-09-01	14:53:22	24473.8	9blue	277.87	---	---	---	20.365	---	---	---	1021.15	28.705	20.365	---	---	21.53	---	---	---	97.103	---	---	---	16.481	---	---	---
2020-09-01	14:53:23	24474.8	9blue	277.68	---	---	---	20.371	---	---	---	1021.16	28.772	20.371	---	---	21.536	---	---	---	97.104	---	---	---	16.429	---	---	---
2020-09-01	14:53:24	24475.8	9blue	277.87	---	---	---	20.374	---	---	---	1021.22	28.838	20.374	---	---	21.527	---	---	---	97.108	---	---	---	16.361	---	---	---
2020-09-01	14:53:25	24476.8	9blue	277.79	---	---	---	20.373	---	---	---	1021.21	28.891	20.373	---	---	21.531	---	---	---	97.084	---	---	---	16.421	---	---	---
2020-09-01	14:53:26	24477.8	9blue	277.97	---	---	---	20.37	---	---	---	1021.16	28.945	20.37	---	---	21.524	---	---	---	97.084	---	---	---	16.434	---	---	---
2020-09-01	14:53:27	24478.8	9blue	277.99	---	---	---	20.364	---	---	---	1021.09	29.001	20.364	---	---	21.526	---	---	---	97.081	---	---	---	16.498	---	---	---
2020-09-01	14:53:28	24479.8	9blue	278.03	---	---	---	20.358	---	---	---	1021.14	29.054	20.358	---	---	21.526	---	---	---	97.07	---	---	---	16.489	---	---	---
2020-09-01	14:53:29	24480.8	9blue	277.98	---	---	---	20.351	---	---	---	1021.19	29.082	20.351	---	---	21.53	---	---	---	97.06	---	---	---	16.489	---	---	---
2020-09-01	10:06:44	7276.45	9green	302.57	---	---	---	19.939	---	---	---	1021.71	52.283	19.939	---	---	20.732	---	---	---	112.054	---	---	---	49.895	---	---	---
2020-09-01	10:06:45	7277.46	9green	303.4	---	---	---	19.94	---	---	---	1021.69	51.925	19.94	---	---	20.702	---	---	---	111.75	---	---	---	51.488	---	---	---
2020-09-01	10:06:46	7278.46	9green	302.91	---	---	---	19.937	---	---	---	1021.64	51.566	19.937	---	---	20.721	---	---	---	111.774	---	---	---	53.07	---	---	---
2020-09-01	10:06:47	7279.46	9green	303.21	---	---	---	19.939	---	---	---	1021.58	51.518	19.939	---	---	20.709	---	---	---	111.669	---	---	---	53.205	---	---	---
2020-09-01	10:06:48	7280.46	9green	302.5	---	---	---	19.94	---	---	---	1021.56	51.459	19.94	---	---	20.734	---	---	---	111.804	---	---	---	53.209	---	---	---
2020-09-01	10:06:49	7281.46	9green	303.18	---	---	---	19.946	---	---	---	1021.59	51.401	19.946	---	---	20.708	---	---	---	111.612	---	---	---	53.135	---	---	---
2020-09-01	10:06:50	7282.45	9green	303.13	---	---	---	19.948	---	---	---	1021.64	51.37	19.948	---	---	20.709	---	---	---	111.643	---	---	---	53.268	---	---	---
2020-09-01	10:06:51	7283.46	9green	302.63	---	---	---	19.95	---	---	---	1021.68	51.39	19.95	---	---	20.727	---	---	---	111.784	---	---	---	52.601	---	---	---
2020-09-01	10:06:52	7284.45	9green	301.3	---	---	---	19.945	---	---	---	1021.67	51.431	19.945	---	---	20.777	---	---	---	112.078	---	---	---	52.445	---	---	---
2020-09-01	10:06:53	7285.45	9green	301.12	---	---	---	19.946	---	---	---	1021.63	51.469	19.946	---	---	20.783	---	---	---	112.126	---	---	---	51.894	---	---	---
2020-09-01	10:06:54	7286.45	9green	301.15	---	---	---	19.947	---	---	---	1021.63	51.497	19.947	---	---	20.781	---	---	---	112.091	---	---	---	50.802	---	---	---
2020-09-01	10:06:55	7287.45	9green	301.06	---	---	---	19.95	---	---	---	1021.61	51.525	19.95	---	---	20.784	---	---	---	112.105	---	---	---	50.831	---	---	---
2020-09-01	10:06:56	7288.45	9green	300.72	---	---	---	19.949	---	---	---	1021.62	51.556	19.949	---	---	20.796	---	---	---	112.175	---	---	---	51.106	---	---	---
2020-09-01	10:06:57	7289.45	9green	300.36	---	---	---	19.949	---	---	---	1021.6	51.586	19.949	---	---	20.81	---	---	---	112.213	---	---	---	52.526	---	---	---
2020-09-01	10:06:58	7290.45	9green	300.5	---	---	---	19.95	---	---	---	1021.62	51.624	19.95	---	---	20.804	---	---	---	112.148	---	---	---	52.887	---	---	---
2020-09-01	10:06:59	7291.46	9green	301.19	---	---	---	19.951	---	---	---	1021.64	51.652	19.951	---	---	20.779	---	---	---	111.965	---	---	---	52.635	---	---	---
2020-09-01	10:07:00	7292.45	9green	301.87	---	---	---	19.951	---	---	---	1021.66	51.64	19.951	---	---	20.754	---	---	---	111.828	---	---	---	52.299	---	---	---
2020-09-01	10:07:01	7293.45	9green	302.14	---	---	---	19.949	---	---	---	1021.65	51.571	19.949	---	---	20.744	---	---	---	111.811	---	---	---	52.08	---	---	---
2020-09-01	10:07:02	7294.46	9green	301.69	---	---	---	19.951	---	---	---	1021.62	51.482	19.951	---	---	20.76	---	---	---	111.927	---	---	---	52.16	---	---	---
2020-09-01	10:07:03	7295.46	9green	301.02	---	---	---	19.952	---	---	---	1021.61	51.423	19.952	---	---	20.785	---	---	---	112.094	---	---	---	52.676	---	---	---
2020-09-01	10:07:04	7296.45	9green	300.19	---	---	---	19.951	---	---	---	1021.61	51.423	19.951	---	---	20.815	---	---	---	112.222	---	---	---	52.537	---	---	---
2020-09-01	10:07:05	7297.46	9green	299.9	---	---	---	19.949	---	---	---	1021.63	51.454	19.949	---	---	20.826	---	---	---	112.286	---	---	---	52.931	---	---	---
2020-09-01	10:07:06	7298.46	9green	299.61	---	---	---	19.949	---	---	---	1021.64	51.495	19.949	---	---	20.837	---	---	---	112.3	---	---	---	52.786	---	---	---
2020-09-01	12:14:29	14940.8	9green	255.93	---	---	---	20.321	---	---	---	1021.16	29.128	20.321	---	---	22.475	---	---	---	107.884	---	---	---	41.616	---	---	---
2020-09-01	12:14:30	14941.8	9green	258.78	---	---	---	20.319	---	---	---	1021.13	29.1	20.319	---	---	22.35	---	---	---	107.063	---	---	---	41.804	---	---	---
2020-09-01	12:14:31	14942.8	9green	261.45	---	---	---	20.323	---	---	---	1021.12	29.232	20.323	---	---	22.23	---	---	---	106.252	---	---	---	42.061	---	---	---
2020-09-01	12:14:32	14943.8	9green	261.35	---	---	---	20.329	---	---	---	1021.09	29.273	20.329	---	---	22.233	---	---	---	106.265	---	---	---	41.965	---	---	---
2020-09-01	12:14:33	14944.8	9green	261.26	---	---	---	20.332	---	---	---	1021.1	29.313	20.332	---	---	22.235	---	---	---	106.289	---	---	---	41.876	---	---	---
2020-09-01	12:14:34	14945.8	9green	261.31	---	---	---	20.329	---	---	---	1021.08	29.341	20.329	---	---	22.234	---	---	---	106.283	---	---	---	41.85	---	---	---
2020-09-01	12:14:35	14946.8	9green	261.11	---	---	---	20.33	---	---	---	1021.05	29.326	20.33	---	---	22.242	---	---	---	106.302	---	---	---	41.889	---	---	---
2020-09-01	12:14:36	14947.8	9green	260.91	---	---	---	20.333	---	---	---	1021.04	29.298	20.333	---	---	22.25	---	---	---	106.316	---	---	---	41.894	---	---	---
2020-09-01	12:14:37	14948.8	9green	260.91	---	---	---	20.335	---	---	---	1021.06	29.138	20.335	---	---	22.25	---	---	---	106.323	---	---	---	41.863	---	---	---
2020-09-01	12:14:38	14949.8	9green	260.84	---	---	---	20.336	---	---	---	1021.13	28.883	20.336	---	---	22.252	---	---	---	106.333	---	---	---	41.837	---	---	---
2020-09-01	12:14:39	14950.8	9green	260.9	---	---	---	20.336	---	---	---	1021.15	28.657	20.336	---	---	22.25	---	---	---	106.319	---	---	---	41.847	---	---	---
2020-09-01	12:14:40	14951.8	9green	260.76	---	---	---	20.337	---	---	---	1021.15	28.601	20.337	---	---	22.255	---	---	---	106.336	---	---	---	41.847	---	---	---
2020-09-01	14:49:01	24213.1	9green	209.64	---	---	---	20.425	---	---	---	1020.85	28.116	20.425	---	---	24.765	---	---	---	115.774	---	---	---	57.212	---	---	---
2020-09-01	14:49:02	24214.1	9green	216.02	---	---	---	20.422	---	---	---	1020.86	27.925	20.422	---	---	24.413	---	---	---	113.851	---	---	---	69.647	---	---	---
2020-09-01	14:49:03	24215.1	9green	222.67	---	---	---	20.42	---	---	---	1020.85	27.775	20.42	---	---	24.047	---	---	---	111.794	---	---	---	82.638	---	---	---
2020-09-01	14:49:04	24216.1	9green	223.76	---	---	---	20.425	---	---	---	1020.84	27.897	20.425	---	---	23.988	---	---	---	111.529	---	---	---	89.346	---	---	---
2020-09-01	14:49:05	24217.1	9green	224.42	---	---	---	20.428	---	---	---	1020.87	27.991	20.428	---	---	23.952	---	---	---	111.306	---	---	---	88.539	---	---	---
2020-09-01	14:49:06	24218.1	9green	224.81	---	---	---	20.43	---	---	---	1020.88	28.057	20.43	---	---	23.931	---	---	---	111.17	---	---	---	83.401	---	---	---
2020-09-01	14:49:07	24219.1	9green	225.13	---	---	---	20.432	---	---	---	1020.85	28.07	20.432	---	---	23.914	---	---	---	111.001	---	---	---	67.587	---	---	---
2020-09-01	14:49:08	24220.1	9green	225.41	---	---	---	20.433	---	---	---	1020.83	28.07	20.433	---	---	23.899	---	---	---	110.934	---	---	---	56.998	---	---	---
2020-09-01	14:49:09	24221.1	9green	225.6	---	---	---	20.437	---	---	---	1020.82	28.057	20.437	---	---	23.888	---	---	---	110.884	---	---	---	50.033	---	---	---
2020-09-01	14:49:10	24222.1	9green	225.48	---	---	---	20.437	---	---	---	1020.86	28.085	20.437	---	---	23.894	---	---	---	110.915	---	---	---	46.984	---	---	---
2020-09-01	14:49:11	24223.1	9green	225.27	---	---	---	20.438	---	---	---	1020.9	28.113	20.438	---	---	23.904	---	---	---	110.897	---	---	---	47.595	---	---	---
2020-09-01	14:49:12	24224.1	9green	225.11	---	---	---	20.437	---	---	---	1020.95	28.141	20.437	---	---	23.913	---	---	---	110.945	---	---	---	45.484	---	---	---
2020-09-01	14:49:13	24225.1	9green	225.09	---	---	---	20.439	---	---	---	1020.95	28.154	20.439	---	---	23.913	---	---	---	110.962	---	---	---	43.627	---	---	---
2020-09-01	14:49:14	24226.1	9green	225.13	---	---	---	20.441	---	---	---	1020.94	28.179	20.441	---	---	23.911	---	---	---	111.002	---	---	---	40.099	---	---	---
2020-09-01	09:58:11	6763.3	9orange	319.47	---	---	---	16.778	---	---	---	1021.91	57.407	16.778	---	---	21.271	---	---	---	117.371	---	---	---	38.01	---	---	---
2020-09-01	09:58:12	6764.3	9orange	306.8	---	---	---	18.304	---	---	---	1021.89	56.525	18.304	---	---	21.176	---	---	---	116.163	---	---	---	41.45	---	---	---
2020-09-01	09:58:13	6765.3	9orange	293.82	---	---	---	19.834	---	---	---	1021.86	55.653	19.834	---	---	21.091	---	---	---	114.961	---	---	---	44.686	---	---	---
2020-09-01	09:58:14	6766.3	9orange	293.69	---	---	---	19.845	---	---	---	1021.82	55.683	19.845	---	---	21.092	---	---	---	114.953	---	---	---	44.577	---	---	---
2020-09-01	09:58:15	6767.3	9orange	293.56	---	---	---	19.855	---	---	---	1021.82	55.704	19.855	---	---	21.094	---	---	---	114.937	---	---	---	44.728	---	---	---
2020-09-01	09:58:16	6768.3	9orange	293.65	---	---	---	19.863	---	---	---	1021.83	55.722	19.863	---	---	21.088	---	---	---	114.933	---	---	---	44.574	---	---	---
2020-09-01	09:58:17	6769.3	9orange	293.53	---	---	---	19.872	---	---	---	1021.86	55.722	19.872	---	---	21.089	---	---	---	114.915	---	---	---	44.592	---	---	---
2020-09-01	09:58:18	6770.3	9orange	293.36	---	---	---	19.883	---	---	---	1021.91	55.691	19.883	---	---	21.092	---	---	---	114.916	---	---	---	43.901	---	---	---
2020-09-01	09:58:19	6771.3	9orange	293.22	---	---	---	19.903	---	---	---	1021.91	55.615	19.903	---	---	21.09	---	---	---	114.938	---	---	---	43.185	---	---	---
2020-09-01	09:58:20	6772.3	9orange	293.15	---	---	---	19.929	---	---	---	1021.9	55.508	19.929	---	---	21.084	---	---	---	114.944	---	---	---	42.528	---	---	---
2020-09-01	09:58:21	6773.3	9orange	292.97	---	---	---	19.956	---	---	---	1021.86	55.393	19.956	---	---	21.082	---	---	---	114.951	---	---	---	42.181	---	---	---
2020-09-01	09:58:22	6774.3	9orange	292.69	---	---	---	19.979	---	---	---	1021.85	55.297	19.979	---	---	21.084	---	---	---	114.935	---	---	---	42.214	---	---	---
2020-09-01	09:58:23	6775.3	9orange	292.48	---	---	---	19.999	---	---	---	1021.84	55.238	19.999	---	---	21.086	---	---	---	114.956	---	---	---	41.852	---	---	---
2020-09-01	09:58:24	6776.3	9orange	292.4	---	---	---	20.01	---	---	---	1021.85	55.228	20.01	---	---	21.085	---	---	---	114.956	---	---	---	40.231	---	---	---
2020-09-01	09:58:25	6777.3	9orange	292.34	---	---	---	20.019	---	---	---	1021.85	55.238	20.019	---	---	21.084	---	---	---	115.004	---	---	---	39.218	---	---	---
2020-09-01	09:58:26	6778.3	9orange	292.26	---	---	---	20.021	---	---	---	1021.86	55.258	20.021	---	---	21.086	---	---	---	114.984	---	---	---	39.246	---	---	---
2020-09-01	09:58:27	6779.3	9orange	292.22	---	---	---	20.021	---	---	---	1021.85	55.279	20.021	---	---	21.088	---	---	---	114.976	---	---	---	41.087	---	---	---
2020-09-01	09:58:28	6780.3	9orange	292.16	---	---	---	20.013	---	---	---	1021.82	55.307	20.013	---	---	21.093	---	---	---	114.937	---	---	---	42.281	---	---	---
2020-09-01	09:58:29	6781.3	9orange	292.16	---	---	---	20.006	---	---	---	1021.79	55.373	20.006	---	---	21.095	---	---	---	114.942	---	---	---	42.449	---	---	---
2020-09-01	09:58:30	6782.3	9orange	292.08	---	---	---	20	---	---	---	1021.79	55.508	20	---	---	21.1	---	---	---	114.947	---	---	---	42.12	---	---	---
2020-09-01	09:58:31	6783.3	9orange	292.15	---	---	---	20.003	---	---	---	1021.83	55.711	20.003	---	---	21.097	---	---	---	114.931	---	---	---	42.597	---	---	---
2020-09-01	09:58:32	6784.3	9orange	292.17	---	---	---	20.009	---	---	---	1021.85	55.887	20.009	---	---	21.094	---	---	---	114.901	---	---	---	43.716	---	---	---
2020-09-01	09:58:33	6785.3	9orange	292.3	---	---	---	20.013	---	---	---	1021.85	55.973	20.013	---	---	21.088	---	---	---	114.922	---	---	---	45.031	---	---	---
2020-09-01	09:58:34	6786.3	9orange	292.11	---	---	---	20.016	---	---	---	1021.84	55.973	20.016	---	---	21.094	---	---	---	114.933	---	---	---	45.579	---	---	---
2020-09-01	12:19:13	15224.6	9orange	261.08	---	---	---	20.287	---	---	---	1021.16	26.948	20.287	---	---	22.299	---	---	---	104.628	---	---	---	30.721	---	---	---
2020-09-01	12:19:14	15225.6	9orange	275.29	---	---	---	20.272	---	---	---	1021.22	26.704	20.272	---	---	21.705	---	---	---	101.284	---	---	---	30.751	---	---	---
2020-09-01	12:19:15	15226.6	9orange	289.4	---	---	---	20.266	---	---	---	1021.22	26.498	20.266	---	---	21.112	---	---	---	97.979	---	---	---	29.622	---	---	---
2020-09-01	12:19:16	15227.6	9orange	289.36	---	---	---	20.276	---	---	---	1021.21	26.351	20.276	---	---	21.11	---	---	---	97.964	---	---	---	29.835	---	---	---
2020-09-01	12:19:17	15228.6	9orange	289.29	---	---	---	20.285	---	---	---	1021.16	26.31	20.285	---	---	21.11	---	---	---	97.95	---	---	---	30.175	---	---	---
2020-09-01	12:19:18	15229.6	9orange	289.22	---	---	---	20.287	---	---	---	1021.16	26.392	20.287	---	---	21.112	---	---	---	97.93	---	---	---	30.284	---	---	---
2020-09-01	12:19:19	15230.6	9orange	289.08	---	---	---	20.286	---	---	---	1021.18	26.539	20.286	---	---	21.118	---	---	---	97.917	---	---	---	30.226	---	---	---
2020-09-01	12:19:20	15231.6	9orange	289.21	---	---	---	20.285	---	---	---	1021.2	26.671	20.285	---	---	21.113	---	---	---	97.904	---	---	---	29.971	---	---	---
2020-09-01	12:19:21	15232.6	9orange	289.32	---	---	---	20.284	---	---	---	1021.2	26.778	20.284	---	---	21.109	---	---	---	97.896	---	---	---	29.839	---	---	---
2020-09-01	12:19:22	15233.6	9orange	289.42	---	---	---	20.278	---	---	---	1021.2	26.859	20.278	---	---	21.107	---	---	---	97.871	---	---	---	29.999	---	---	---
2020-09-01	12:19:23	15234.6	9orange	289.55	---	---	---	20.268	---	---	---	1021.25	26.941	20.268	---	---	21.106	---	---	---	97.868	---	---	---	29.832	---	---	---
2020-09-01	12:19:24	15235.6	9orange	289.79	---	---	---	20.255	---	---	---	1021.25	27.022	20.255	---	---	21.101	---	---	---	97.884	---	---	---	29.917	---	---	---
2020-09-01	12:19:25	15236.6	9orange	289.98	---	---	---	20.245	---	---	---	1021.25	27.088	20.245	---	---	21.097	---	---	---	97.908	---	---	---	29.582	---	---	---
2020-09-01	12:19:26	15237.6	9orange	289.76	---	---	---	20.241	---	---	---	1021.19	27.154	20.241	---	---	21.107	---	---	---	97.908	---	---	---	29.794	---	---	---
2020-09-01	12:19:27	15238.6	9orange	289.67	---	---	---	20.242	---	---	---	1021.16	27.221	20.242	---	---	21.11	---	---	---	97.886	---	---	---	29.922	---	---	---
2020-09-01	14:51:28	24360.2	9orange	244.95	---	---	---	20.368	---	---	---	1021.01	27.93	20.368	---	---	23.044	---	---	---	106.071	---	---	---	35.167	---	---	---
2020-09-01	14:51:29	24361.2	9orange	264.39	---	---	---	20.291	---	---	---	1021.06	27.696	20.291	---	---	22.195	---	---	---	101.18	---	---	---	31.179	---	---	---
2020-09-01	14:51:30	24362.2	9orange	283.99	---	---	---	20.216	---	---	---	1021.04	27.421	20.216	---	---	21.338	---	---	---	96.281	---	---	---	27.911	---	---	---
2020-09-01	14:51:31	24363.2	9orange	283.97	---	---	---	20.213	---	---	---	1021	27.421	20.213	---	---	21.34	---	---	---	96.262	---	---	---	30.446	---	---	---
2020-09-01	14:51:32	24364.2	9orange	284.27	---	---	---	20.209	---	---	---	1020.98	27.421	20.209	---	---	21.33	---	---	---	96.237	---	---	---	33.447	---	---	---
2020-09-01	14:51:33	24365.2	9orange	284.19	---	---	---	20.204	---	---	---	1021.02	27.408	20.204	---	---	21.335	---	---	---	96.204	---	---	---	35.664	---	---	---
2020-09-01	14:51:34	24366.2	9orange	284	---	---	---	20.205	---	---	---	1020.99	27.383	20.205	---	---	21.342	---	---	---	96.201	---	---	---	36.417	---	---	---
2020-09-01	14:51:35	24367.2	9orange	283.63	---	---	---	20.206	---	---	---	1020.99	27.355	20.206	---	---	21.356	---	---	---	96.206	---	---	---	35.383	---	---	---
2020-09-01	14:51:36	24368.2	9orange	283.55	---	---	---	20.206	---	---	---	1021.01	27.355	20.206	---	---	21.359	---	---	---	96.19	---	---	---	33.577	---	---	---
2020-09-01	14:51:37	24369.2	9orange	283.33	---	---	---	20.205	---	---	---	1021.06	27.355	20.205	---	---	21.368	---	---	---	96.214	---	---	---	31.829	---	---	---
2020-09-01	14:51:38	24370.2	9orange	283.78	---	---	---	20.201	---	---	---	1021.03	27.302	20.201	---	---	21.351	---	---	---	96.209	---	---	---	30.333	---	---	---
2020-09-01	14:51:39	24371.2	9orange	283.87	---	---	---	20.201	---	---	---	1021.02	27.248	20.201	---	---	21.348	---	---	---	96.272	---	---	---	28.802	---	---	---
2020-09-01	14:51:40	24372.2	9orange	284.3	---	---	---	20.194	---	---	---	1021.03	27.22	20.194	---	---	21.334	---	---	---	96.305	---	---	---	27.399	---	---	---
2020-09-01	14:51:41	24373.2	9orange	284.27	---	---	---	20.192	---	---	---	1021.07	27.248	20.192	---	---	21.336	---	---	---	96.329	---	---	---	25.792	---	---	---
2020-09-01	14:51:42	24374.2	9orange	284.46	---	---	---	20.191	---	---	---	1021.09	27.302	20.191	---	---	21.328	---	---	---	96.29	---	---	---	24.519	---	---	---
2020-09-01	09:59:11	6822.98	9red	291.21	---	---	---	19.997	---	---	---	1021.86	55.711	19.997	---	---	21.135	---	---	---	115.267	---	---	---	45.92	---	---	---
2020-09-01	09:59:12	6823.98	9red	290.19	---	---	---	19.981	---	---	---	1021.86	55.46	19.981	---	---	21.179	---	---	---	115.542	---	---	---	48.552	---	---	---
2020-09-01	09:59:13	6824.98	9red	289.39	---	---	---	19.966	---	---	---	1021.84	55.236	19.966	---	---	21.215	---	---	---	115.838	---	---	---	48.519	---	---	---
2020-09-01	09:59:14	6825.98	9red	289.64	---	---	---	19.972	---	---	---	1021.83	55.264	19.972	---	---	21.203	---	---	---	115.826	---	---	---	48.632	---	---	---
2020-09-01	09:59:15	6826.98	9red	289.74	---	---	---	19.977	---	---	---	1021.82	55.264	19.977	---	---	21.197	---	---	---	115.779	---	---	---	46.838	---	---	---
2020-09-01	09:59:16	6827.98	9red	289.66	---	---	---	19.983	---	---	---	1021.81	55.226	19.983	---	---	21.198	---	---	---	115.764	---	---	---	47.638	---	---	---
2020-09-01	09:59:17	6828.98	9red	289.53	---	---	---	19.99	---	---	---	1021.8	55.119	19.99	---	---	21.201	---	---	---	115.775	---	---	---	49.532	---	---	---
2020-09-01	09:59:18	6829.98	9red	289.41	---	---	---	19.995	---	---	---	1021.83	54.991	19.995	---	---	21.204	---	---	---	115.785	---	---	---	48.906	---	---	---
2020-09-01	09:59:19	6830.98	9red	289.54	---	---	---	19.997	---	---	---	1021.87	54.846	19.997	---	---	21.198	---	---	---	115.776	---	---	---	49.365	---	---	---
2020-09-01	09:59:20	6831.98	9red	289.43	---	---	---	19.999	---	---	---	1021.88	54.732	19.999	---	---	21.202	---	---	---	115.766	---	---	---	49.799	---	---	---
2020-09-01	09:59:21	6832.98	9red	289.45	---	---	---	19.999	---	---	---	1021.87	54.646	19.999	---	---	21.201	---	---	---	115.799	---	---	---	51.946	---	---	---
2020-09-01	09:59:22	6833.98	9red	289.41	---	---	---	20.001	---	---	---	1021.85	54.587	20.001	---	---	21.202	---	---	---	115.779	---	---	---	52.134	---	---	---
2020-09-01	12:17:58	15149.6	9red	275.72	---	---	---	20.286	---	---	---	1021.15	26.582	20.286	---	---	21.645	---	---	---	101.073	---	---	---	65.954	---	---	---
2020-09-01	12:17:59	15150.6	9red	273.66	---	---	---	20.314	---	---	---	1021.14	26.348	20.314	---	---	21.719	---	---	---	101.482	---	---	---	48.706	---	---	---
2020-09-01	12:18:00	15151.6	9red	271.59	---	---	---	20.34	---	---	---	1021.15	26.086	20.34	---	---	21.795	---	---	---	101.985	---	---	---	33.274	---	---	---
2020-09-01	12:18:01	15152.6	9red	270.67	---	---	---	20.342	---	---	---	1021.18	26.201	20.342	---	---	21.833	---	---	---	102.215	---	---	---	33.03	---	---	---
2020-09-01	12:18:02	15153.6	9red	269.19	---	---	---	20.339	---	---	---	1021.23	26.31	20.339	---	---	21.896	---	---	---	102.55	---	---	---	32.755	---	---	---
2020-09-01	12:18:03	15154.6	9red	267.31	---	---	---	20.338	---	---	---	1021.23	26.351	20.338	---	---	21.975	---	---	---	102.937	---	---	---	31.794	---	---	---
2020-09-01	12:18:04	15155.6	9red	265.16	---	---	---	20.338	---	---	---	1021.19	26.366	20.338	---	---	22.066	---	---	---	103.367	---	---	---	31.589	---	---	---
2020-09-01	12:18:05	15156.6	9red	263.15	---	---	---	20.341	---	---	---	1021.16	26.391	20.341	---	---	22.151	---	---	---	103.788	---	---	---	33.086	---	---	---
2020-09-01	12:18:06	15157.6	9red	261.35	---	---	---	20.343	---	---	---	1021.2	26.498	20.343	---	---	22.228	---	---	---	104.204	---	---	---	33.974	---	---	---
2020-09-01	12:18:07	15158.6	9red	259.78	---	---	---	20.343	---	---	---	1021.21	26.63	20.343	---	---	22.296	---	---	---	104.566	---	---	---	34.763	---	---	---
2020-09-01	12:18:08	15159.6	9red	258.61	---	---	---	20.343	---	---	---	1021.17	26.765	20.343	---	---	22.347	---	---	---	104.933	---	---	---	33.276	---	---	---
2020-09-01	12:18:09	15160.6	9red	257.46	---	---	---	20.343	---	---	---	1021.15	26.86	20.343	---	---	22.398	---	---	---	105.238	---	---	---	32.659	---	---	---
2020-09-01	12:18:10	15161.6	9red	256.51	---	---	---	20.344	---	---	---	1021.14	26.915	20.344	---	---	22.439	---	---	---	105.523	---	---	---	31.994	---	---	---
2020-09-01	12:18:11	15162.6	9red	255.48	---	---	---	20.344	---	---	---	1021.19	26.981	20.344	---	---	22.485	---	---	---	105.758	---	---	---	31.735	---	---	---
2020-09-01	12:18:12	15163.6	9red	254.42	---	---	---	20.345	---	---	---	1021.18	26.941	20.345	---	---	22.532	---	---	---	105.982	---	---	---	31.388	---	---	---
2020-09-01	12:18:13	15164.6	9red	253.42	---	---	---	20.345	---	---	---	1021.2	26.793	20.345	---	---	22.577	---	---	---	106.201	---	---	---	31.407	---	---	---
2020-09-01	12:18:14	15165.6	9red	252.76	---	---	---	20.343	---	---	---	1021.17	26.539	20.343	---	---	22.608	---	---	---	106.392	---	---	---	31.416	---	---	---
2020-09-01	12:18:15	15166.6	9red	252.37	---	---	---	20.338	---	---	---	1021.17	26.391	20.338	---	---	22.627	---	---	---	106.557	---	---	---	31.202	---	---	---
2020-09-01	12:18:16	15167.6	9red	252.02	---	---	---	20.33	---	---	---	1021.17	26.376	20.33	---	---	22.646	---	---	---	106.684	---	---	---	30.933	---	---	---
2020-09-01	12:18:17	15168.6	9red	251.48	---	---	---	20.32	---	---	---	1021.17	26.498	20.32	---	---	22.674	---	---	---	106.799	---	---	---	30.787	---	---	---
2020-09-01	12:18:18	15169.6	9red	251.06	---	---	---	20.313	---	---	---	1021.15	26.661	20.313	---	---	22.695	---	---	---	106.906	---	---	---	31.275	---	---	---
2020-09-01	12:18:19	15170.6	9red	250.9	---	---	---	20.305	---	---	---	1021.13	26.849	20.305	---	---	22.706	---	---	---	106.961	---	---	---	33.381	---	---	---
2020-09-01	12:18:20	15171.6	9red	250.58	---	---	---	20.301	---	---	---	1021.14	27.009	20.301	---	---	22.722	---	---	---	107.048	---	---	---	33.682	---	---	---
2020-09-01	12:18:21	15172.6	9red	250.18	---	---	---	20.296	---	---	---	1021.12	27.157	20.296	---	---	22.742	---	---	---	107.128	---	---	---	33.573	---	---	---
2020-09-01	12:18:22	15173.6	9red	249.56	---	---	---	20.295	---	---	---	1021.17	27.276	20.295	---	---	22.771	---	---	---	107.244	---	---	---	31.323	---	---	---
2020-09-01	12:18:23	15174.6	9red	249.19	---	---	---	20.295	---	---	---	1021.17	27.37	20.295	---	---	22.788	---	---	---	107.298	---	---	---	31.657	---	---	---
2020-09-01	12:18:24	15175.6	9red	248.99	---	---	---	20.298	---	---	---	1021.2	27.33	20.298	---	---	22.796	---	---	---	107.382	---	---	---	31.533	---	---	---
2020-09-01	12:18:25	15176.6	9red	248.86	---	---	---	20.298	---	---	---	1021.14	27.103	20.298	---	---	22.801	---	---	---	107.439	---	---	---	32.131	---	---	---
2020-09-01	12:18:26	15177.6	9red	248.65	---	---	---	20.298	---	---	---	1021.16	26.862	20.298	---	---	22.811	---	---	---	107.516	---	---	---	31.858	---	---	---
2020-09-01	12:18:27	15178.6	9red	248.23	---	---	---	20.297	---	---	---	1021.16	26.755	20.297	---	---	22.831	---	---	---	107.554	---	---	---	32.362	---	---	---
2020-09-01	12:18:28	15179.6	9red	248.01	---	---	---	20.292	---	---	---	1021.19	26.821	20.292	---	---	22.843	---	---	---	107.596	---	---	---	32.385	---	---	---
2020-09-01	12:18:29	15180.6	9red	247.88	---	---	---	20.29	---	---	---	1021.16	26.928	20.29	---	---	22.85	---	---	---	107.664	---	---	---	31.544	---	---	---
2020-09-01	12:18:30	15181.6	9red	247.75	---	---	---	20.287	---	---	---	1021.15	27.022	20.287	---	---	22.857	---	---	---	107.747	---	---	---	30.522	---	---	---
2020-09-01	12:18:31	15182.6	9red	247.55	---	---	---	20.288	---	---	---	1021.14	27.104	20.288	---	---	22.866	---	---	---	107.84	---	---	---	29.538	---	---	---
2020-09-01	12:18:32	15183.6	9red	247.22	---	---	---	20.291	---	---	---	1021.16	27.17	20.291	---	---	22.88	---	---	---	107.902	---	---	---	29.479	---	---	---
2020-09-01	12:18:33	15184.6	9red	247.16	---	---	---	20.295	---	---	---	1021.19	27.236	20.295	---	---	22.882	---	---	---	107.934	---	---	---	29.371	---	---	---
2020-09-01	12:18:34	15185.6	9red	246.96	---	---	---	20.3	---	---	---	1021.17	27.261	20.3	---	---	22.889	---	---	---	107.967	---	---	---	29.389	---	---	---
2020-09-01	12:18:35	15186.6	9red	246.93	---	---	---	20.3	---	---	---	1021.18	27.154	20.3	---	---	22.89	---	---	---	107.947	---	---	---	30.621	---	---	---
2020-09-01	14:52:19	24411.1	9red	268.71	---	---	---	20.232	---	---	---	1021.12	27.566	20.232	---	---	22.002	---	---	---	99.845	---	---	---	22.764	---	---	---
2020-09-01	14:52:20	24412.1	9red	252.49	---	---	---	20.268	---	---	---	1021.15	27.775	20.268	---	---	22.699	---	---	---	103.532	---	---	---	21.423	---	---	---
2020-09-01	14:52:21	24413.1	9red	235.84	---	---	---	20.303	---	---	---	1021.14	27.971	20.303	---	---	23.42	---	---	---	107.416	---	---	---	20.35	---	---	---
2020-09-01	14:52:22	24414.1	9red	234.17	---	---	---	20.299	---	---	---	1021.12	27.943	20.299	---	---	23.503	---	---	---	107.852	---	---	---	20.126	---	---	---
2020-09-01	14:52:23	24415.1	9red	230.06	---	---	---	20.293	---	---	---	1021.14	27.93	20.293	---	---	23.714	---	---	---	108.989	---	---	---	19.928	---	---	---
2020-09-01	14:52:24	24416.1	9red	223.49	---	---	---	20.28	---	---	---	1021.11	27.864	20.28	---	---	24.061	---	---	---	110.878	---	---	---	19.824	---	---	---
2020-09-01	14:52:25	24417.1	9red	217.08	---	---	---	20.265	---	---	---	1021.07	27.757	20.265	---	---	24.404	---	---	---	112.749	---	---	---	19.672	---	---	---
2020-09-01	14:52:26	24418.1	9red	213	---	---	---	20.248	---	---	---	1021.03	27.663	20.248	---	---	24.631	---	---	---	113.994	---	---	---	19.648	---	---	---
2020-09-01	14:52:27	24419.1	9red	211.6	---	---	---	20.232	---	---	---	1021.07	27.622	20.232	---	---	24.714	---	---	---	114.435	---	---	---	19.554	---	---	---
2020-09-01	14:52:28	24420.1	9red	209.98	---	---	---	20.22	---	---	---	1021.11	27.622	20.22	---	---	24.81	---	---	---	114.903	---	---	---	19.481	---	---	---
2020-09-01	14:52:29	24421.1	9red	208.71	---	---	---	20.214	---	---	---	1021.1	27.65	20.214	---	---	24.884	---	---	---	115.244	---	---	---	19.489	---	---	---
2020-09-01	14:52:30	24422.1	9red	207.18	---	---	---	20.214	---	---	---	1021.08	27.719	20.214	---	---	24.971	---	---	---	115.683	---	---	---	19.481	---	---	---
2020-09-01	14:52:31	24423.1	9red	205.6	---	---	---	20.216	---	---	---	1021.06	27.813	20.216	---	---	25.061	---	---	---	116.135	---	---	---	19.538	---	---	---
2020-09-01	14:52:32	24424.1	9red	203.87	---	---	---	20.217	---	---	---	1021.08	27.892	20.217	---	---	25.162	---	---	---	116.668	---	---	---	19.345	---	---	---
2020-09-01	14:52:33	24425.1	9red	202.04	---	---	---	20.215	---	---	---	1021.11	27.93	20.215	---	---	25.269	---	---	---	117.17	---	---	---	19.343	---	---	---
2020-09-01	14:52:34	24426.1	9red	200.56	---	---	---	20.212	---	---	---	1021.12	27.971	20.212	---	---	25.358	---	---	---	117.695	---	---	---	19.243	---	---	---
2020-09-01	14:52:35	24427.1	9red	198.97	---	---	---	20.207	---	---	---	1021.14	28.027	20.207	---	---	25.454	---	---	---	118.189	---	---	---	19.358	---	---	---
2020-09-01	14:52:36	24428.1	9red	197.68	---	---	---	20.21	---	---	---	1021.12	28.108	20.21	---	---	25.531	---	---	---	118.624	---	---	---	19.324	---	---	---
2020-09-01	14:52:37	24429.1	9red	196.35	---	---	---	20.217	---	---	---	1021.12	28.19	20.217	---	---	25.609	---	---	---	119.003	---	---	---	19.328	---	---	---
2020-09-01	14:52:38	24430.1	9red	195.28	---	---	---	20.23	---	---	---	1021.1	28.243	20.23	---	---	25.669	---	---	---	119.322	---	---	---	19.279	---	---	---
2020-09-01	14:52:39	24431.1	9red	194.45	---	---	---	20.244	---	---	---	1021.09	28.256	20.244	---	---	25.714	---	---	---	119.576	---	---	---	19.117	---	---	---
2020-09-01	14:52:40	24432.1	9red	193.97	---	---	---	20.255	---	---	---	1021.13	28.24	20.255	---	---	25.74	---	---	---	119.728	---	---	---	19.074	---	---	---
2020-09-01	14:52:41	24433.1	9red	193.7	---	---	---	20.26	---	---	---	1021.14	28.24	20.26	---	---	25.754	---	---	---	119.82	---	---	---	18.985	---	---	---
2020-09-01	14:52:42	24434.1	9red	193.61	---	---	---	20.262	---	---	---	1021.16	28.281	20.262	---	---	25.759	---	---	---	119.849	---	---	---	18.975	---	---	---
2020-09-01	14:52:43	24435.1	9red	193.77	---	---	---	20.267	---	---	---	1021.11	28.322	20.267	---	---	25.748	---	---	---	119.798	---	---	---	18.91	---	---	---
2020-09-01	14:52:44	24436.1	9red	193.98	---	---	---	20.272	---	---	---	1021.08	28.36	20.272	---	---	25.733	---	---	---	119.706	---	---	---	18.822	---	---	---
2020-09-01	14:52:45	24437.1	9red	194.32	---	---	---	20.278	---	---	---	1021.08	28.372	20.278	---	---	25.709	---	---	---	119.592	---	---	---	18.747	---	---	---
2020-09-01	14:52:46	24438.1	9red	194.71	---	---	---	20.279	---	---	---	1021.11	28.4	20.279	---	---	25.685	---	---	---	119.441	---	---	---	18.729	---	---	---
2020-09-01	14:52:47	24439.1	9red	195.42	---	---	---	20.281	---	---	---	1021.12	28.421	20.281	---	---	25.642	---	---	---	119.232	---	---	---	18.796	---	---	---
2020-09-01	14:52:48	24440.1	9red	195.99	---	---	---	20.281	---	---	---	1021.13	28.449	20.281	---	---	25.607	---	---	---	119.025	---	---	---	18.847	---	---	---
2020-09-01	14:52:49	24441.1	9red	196.47	---	---	---	20.284	---	---	---	1021.11	28.454	20.284	---	---	25.577	---	---	---	118.888	---	---	---	18.851	---	---	---
2020-09-01	10:05:33	7204.6	9white	294.83	---	---	---	19.941	---	---	---	1021.7	52.888	19.941	---	---	21.018	---	---	---	114.008	---	---	---	37.278	---	---	---
2020-09-01	10:05:34	7205.6	9white	298.04	---	---	---	19.94	---	---	---	1021.7	52.568	19.94	---	---	20.899	---	---	---	113.226	---	---	---	42.551	---	---	---
2020-09-01	10:05:35	7206.6	9white	301.34	---	---	---	19.936	---	---	---	1021.7	52.276	19.936	---	---	20.777	---	---	---	112.405	---	---	---	47.757	---	---	---
2020-09-01	10:05:36	7207.6	9white	301.51	---	---	---	19.941	---	---	---	1021.7	52.303	19.941	---	---	20.77	---	---	---	112.371	---	---	---	46.97	---	---	---
2020-09-01	10:05:37	7208.6	9white	301.8	---	---	---	19.943	---	---	---	1021.7	52.341	19.943	---	---	20.758	---	---	---	112.315	---	---	---	48.171	---	---	---
2020-09-01	10:05:38	7209.6	9white	301.75	---	---	---	19.945	---	---	---	1021.68	52.369	19.945	---	---	20.759	---	---	---	112.308	---	---	---	48.104	---	---	---
2020-09-01	10:05:39	7210.6	9white	301.51	---	---	---	19.945	---	---	---	1021.64	52.397	19.945	---	---	20.768	---	---	---	112.32	---	---	---	48.239	---	---	---
2020-09-01	10:05:40	7211.6	9white	300.9	---	---	---	19.944	---	---	---	1021.64	52.435	19.944	---	---	20.791	---	---	---	112.435	---	---	---	46.84	---	---	---
2020-09-01	10:05:41	7212.6	9white	298.8	---	---	---	19.942	---	---	---	1021.62	52.476	19.942	---	---	20.869	---	---	---	112.949	---	---	---	47.189	---	---	---
2020-09-01	10:05:42	7213.6	9white	296.99	---	---	---	19.941	---	---	---	1021.63	52.514	19.941	---	---	20.936	---	---	---	113.437	---	---	---	47.561	---	---	---
2020-09-01	10:05:43	7214.6	9white	296.22	---	---	---	19.941	---	---	---	1021.62	52.542	19.941	---	---	20.965	---	---	---	113.631	---	---	---	48.31	---	---	---
2020-09-01	10:05:44	7215.6	9white	298.37	---	---	---	19.941	---	---	---	1021.68	52.57	19.941	---	---	20.885	---	---	---	113.156	---	---	---	48.866	---	---	---
2020-09-01	10:05:45	7216.6	9white	301.6	---	---	---	19.941	---	---	---	1021.7	52.601	19.941	---	---	20.767	---	---	---	112.394	---	---	---	48.112	---	---	---
2020-09-01	10:05:46	7217.6	9white	307.33	---	---	---	19.941	---	---	---	1021.73	52.631	19.941	---	---	20.563	---	---	---	111.05	---	---	---	48.386	---	---	---
2020-09-01	10:05:47	7218.6	9white	308.28	---	---	---	19.942	---	---	---	1021.67	52.652	19.942	---	---	20.528	---	---	---	110.734	---	---	---	47.669	---	---	---
2020-09-01	10:05:48	7219.6	9white	307.36	---	---	---	19.942	---	---	---	1021.67	52.662	19.942	---	---	20.562	---	---	---	110.912	---	---	---	48.719	---	---	---
2020-09-01	10:05:49	7220.6	9white	302.8	---	---	---	19.942	---	---	---	1021.68	52.662	19.942	---	---	20.723	---	---	---	111.923	---	---	---	48.298	---	---	---
2020-09-01	10:05:50	7221.6	9white	301.89	---	---	---	19.941	---	---	---	1021.69	52.662	19.941	---	---	20.755	---	---	---	112.172	---	---	---	47.931	---	---	---
2020-09-01	10:05:51	7222.6	9white	301.86	---	---	---	19.941	---	---	---	1021.7	52.662	19.941	---	---	20.757	---	---	---	112.229	---	---	---	47.033	---	---	---
2020-09-01	10:05:52	7223.6	9white	301.89	---	---	---	19.939	---	---	---	1021.67	52.652	19.939	---	---	20.756	---	---	---	112.229	---	---	---	47.235	---	---	---
2020-09-01	10:05:53	7224.6	9white	301.88	---	---	---	19.939	---	---	---	1021.68	52.641	19.939	---	---	20.757	---	---	---	112.194	---	---	---	47.942	---	---	---
2020-09-01	10:05:54	7225.6	9white	302.33	---	---	---	19.941	---	---	---	1021.68	52.641	19.941	---	---	20.74	---	---	---	112.147	---	---	---	48.767	---	---	---
2020-09-01	10:05:55	7226.6	9white	302.53	---	---	---	19.941	---	---	---	1021.73	52.641	19.941	---	---	20.733	---	---	---	112.131	---	---	---	48.353	---	---	---
2020-09-01	10:05:56	7227.6	9white	302.74	---	---	---	19.938	---	---	---	1021.73	52.641	19.938	---	---	20.726	---	---	---	112.161	---	---	---	48.525	---	---	---
2020-09-01	10:05:57	7228.6	9white	303.02	---	---	---	19.938	---	---	---	1021.74	52.621	19.938	---	---	20.716	---	---	---	112.045	---	---	---	48.18	---	---	---
2020-09-01	12:13:35	14886.9	9white	263.27	---	---	---	20.322	---	---	---	1021.13	29.911	20.322	---	---	22.158	---	---	---	106.313	---	---	---	41.081	---	---	---
2020-09-01	12:13:36	14887.9	9white	258.19	---	---	---	20.316	---	---	---	1021.15	29.723	20.316	---	---	22.38	---	---	---	107.515	---	---	---	41.284	---	---	---
2020-09-01	12:13:37	14888.9	9white	253.16	---	---	---	20.311	---	---	---	1021.17	29.507	20.311	---	---	22.601	---	---	---	108.745	---	---	---	41.485	---	---	---
2020-09-01	12:13:38	14889.9	9white	253.22	---	---	---	20.315	---	---	---	1021.15	29.479	20.315	---	---	22.597	---	---	---	108.752	---	---	---	41.483	---	---	---
2020-09-01	12:13:39	14890.9	9white	253.15	---	---	---	20.315	---	---	---	1021.12	29.385	20.315	---	---	22.6	---	---	---	108.754	---	---	---	41.497	---	---	---
2020-09-01	12:13:40	14891.9	9white	252.81	---	---	---	20.315	---	---	---	1021.13	29.25	20.315	---	---	22.615	---	---	---	108.75	---	---	---	41.493	---	---	---
2020-09-01	12:13:41	14892.9	9white	252.74	---	---	---	20.314	---	---	---	1021.15	29.197	20.314	---	---	22.619	---	---	---	108.756	---	---	---	41.203	---	---	---
2020-09-01	12:13:42	14893.9	9white	252.77	---	---	---	20.315	---	---	---	1021.17	29.209	20.315	---	---	22.617	---	---	---	108.781	---	---	---	41.006	---	---	---
2020-09-01	12:13:43	14894.9	9white	252.96	---	---	---	20.316	---	---	---	1021.14	29.278	20.316	---	---	22.608	---	---	---	108.778	---	---	---	41.034	---	---	---
2020-09-01	12:13:44	14895.9	9white	252.96	---	---	---	20.317	---	---	---	1021.09	29.385	20.317	---	---	22.608	---	---	---	108.768	---	---	---	41.339	---	---	---
2020-09-01	12:13:45	14896.9	9white	252.87	---	---	---	20.321	---	---	---	1021.09	29.385	20.321	---	---	22.611	---	---	---	108.735	---	---	---	41.528	---	---	---
2020-09-01	12:13:46	14897.9	9white	252.97	---	---	---	20.322	---	---	---	1021.11	29.222	20.322	---	---	22.605	---	---	---	108.723	---	---	---	41.442	---	---	---
2020-09-01	14:47:47	24139.3	9white	218.93	---	---	---	20.377	---	---	---	1020.94	28.856	20.377	---	---	24.274	---	---	---	113.475	---	---	---	100.622	---	---	---
2020-09-01	14:47:48	24140.3	9white	212.35	---	---	---	20.383	---	---	---	1020.99	28.528	20.383	---	---	24.632	---	---	---	115.325	---	---	---	58.035	---	---	---
2020-09-01	14:47:49	24141.3	9white	205.38	---	---	---	20.393	---	---	---	1021.05	28.212	20.393	---	---	25.009	---	---	---	117.336	---	---	---	37.994	---	---	---
2020-09-01	14:47:50	24142.3	9white	205.24	---	---	---	20.404	---	---	---	1020.97	28.2	20.404	---	---	25.013	---	---	---	117.285	---	---	---	40.716	---	---	---
2020-09-01	14:47:51	24143.3	9white	205.02	---	---	---	20.411	---	---	---	1020.92	28.24	20.411	---	---	25.023	---	---	---	117.23	---	---	---	50.855	---	---	---
2020-09-01	14:47:52	24144.3	9white	204.74	---	---	---	20.418	---	---	---	1020.9	28.322	20.418	---	---	25.037	---	---	---	117.274	---	---	---	55.261	---	---	---
2020-09-01	14:47:53	24145.3	9white	204.41	---	---	---	20.421	---	---	---	1020.94	28.469	20.421	---	---	25.054	---	---	---	117.455	---	---	---	66.706	---	---	---
2020-09-01	14:47:54	24146.3	9white	204.43	---	---	---	20.424	---	---	---	1020.99	28.601	20.424	---	---	25.052	---	---	---	117.504	---	---	---	61.408	---	---	---
2020-09-01	14:47:55	24147.3	9white	204.24	---	---	---	20.422	---	---	---	1021	28.667	20.422	---	---	25.064	---	---	---	117.65	---	---	---	69.73	---	---	---
2020-09-01	14:47:56	24148.3	9white	204.39	---	---	---	20.423	---	---	---	1021.01	28.667	20.423	---	---	25.055	---	---	---	117.531	---	---	---	59.009	---	---	---
2020-09-01	14:47:57	24149.3	9white	204.27	---	---	---	20.425	---	---	---	1020.99	28.642	20.425	---	---	25.061	---	---	---	117.566	---	---	---	57.806	---	---	---
2020-09-01	14:47:58	24150.3	9white	204.28	---	---	---	20.428	---	---	---	1021	28.629	20.428	---	---	25.059	---	---	---	117.486	---	---	---	47.404	---	---	---
2020-09-01	14:47:59	24151.3	9white	204.09	---	---	---	20.432	---	---	---	1021	28.629	20.432	---	---	25.07	---	---	---	117.529	---	---	---	46.417	---	---	---
2020-09-01	14:48:00	24152.3	9white	203.83	---	---	---	20.433	---	---	---	1020.95	28.588	20.433	---	---	25.084	---	---	---	117.554	---	---	---	46.505	---	---	---
2020-09-01	14:48:01	24153.3	9white	203.87	---	---	---	20.432	---	---	---	1020.88	28.535	20.432	---	---	25.082	---	---	---	117.534	---	---	---	46.061	---	---	---
2020-09-01	14:48:02	24154.3	9white	203.85	---	---	---	20.43	---	---	---	1020.82	28.441	20.43	---	---	25.084	---	---	---	117.537	---	---	---	47.208	---	---	---
2020-09-01	14:48:03	24155.3	9white	203.86	---	---	---	20.428	---	---	---	1020.82	28.388	20.428	---	---	25.084	---	---	---	117.551	---	---	---	46.341	---	---	---
2020-09-01	10:04:40	7151.57	9yellow	291.29	---	---	---	19.971	---	---	---	1021.8	54.114	19.971	---	---	21.14	---	---	---	115.251	---	---	---	26.309	---	---	---
2020-09-01	10:04:41	7152.57	9yellow	291.85	---	---	---	19.95	---	---	---	1021.74	53.755	19.95	---	---	21.126	---	---	---	115.019	---	---	---	28.468	---	---	---
2020-09-01	10:04:42	7153.58	9yellow	292.35	---	---	---	19.926	---	---	---	1021.71	53.427	19.926	---	---	21.115	---	---	---	114.778	---	---	---	31.545	---	---	---
2020-09-01	10:04:43	7154.57	9yellow	292.32	---	---	---	19.929	---	---	---	1021.69	53.458	19.929	---	---	21.115	---	---	---	114.77	---	---	---	31.317	---	---	---
2020-09-01	10:04:44	7155.58	9yellow	292.29	---	---	---	19.93	---	---	---	1021.71	53.458	19.93	---	---	21.116	---	---	---	114.774	---	---	---	31.484	---	---	---
2020-09-01	10:04:45	7156.57	9yellow	292.17	---	---	---	19.936	---	---	---	1021.7	53.427	19.936	---	---	21.119	---	---	---	114.761	---	---	---	31.662	---	---	---
2020-09-01	10:04:46	7157.57	9yellow	292.11	---	---	---	19.939	---	---	---	1021.69	53.397	19.939	---	---	21.12	---	---	---	114.774	---	---	---	31.707	---	---	---
2020-09-01	10:04:47	7158.57	9yellow	291.94	---	---	---	19.939	---	---	---	1021.67	53.379	19.939	---	---	21.126	---	---	---	114.74	---	---	---	31.558	---	---	---
2020-09-01	10:04:48	7159.57	9yellow	292.14	---	---	---	19.938	---	---	---	1021.65	53.372	19.938	---	---	21.119	---	---	---	114.72	---	---	---	31.085	---	---	---
2020-09-01	10:04:49	7160.57	9yellow	292.04	---	---	---	19.935	---	---	---	1021.67	53.344	19.935	---	---	21.124	---	---	---	114.724	---	---	---	31.172	---	---	---
2020-09-01	10:04:50	7161.57	9yellow	292.12	---	---	---	19.934	---	---	---	1021.66	53.303	19.934	---	---	21.121	---	---	---	114.717	---	---	---	31.232	---	---	---
2020-09-01	10:04:51	7162.57	9yellow	292.04	---	---	---	19.935	---	---	---	1021.69	53.262	19.935	---	---	21.124	---	---	---	114.732	---	---	---	32.042	---	---	---
2020-09-01	10:04:52	7163.57	9yellow	291.98	---	---	---	19.939	---	---	---	1021.69	53.234	19.939	---	---	21.125	---	---	---	114.697	---	---	---	32.01	---	---	---
2020-09-01	10:04:53	7164.58	9yellow	291.96	---	---	---	19.942	---	---	---	1021.69	53.227	19.942	---	---	21.125	---	---	---	114.723	---	---	---	31.887	---	---	---
2020-09-01	10:04:54	7165.57	9yellow	291.83	---	---	---	19.945	---	---	---	1021.7	53.209	19.945	---	---	21.128	---	---	---	114.75	---	---	---	31.389	---	---	---
2020-09-01	12:12:45	14837	9yellow	314.16	---	---	---	16.947	---	---	---	1021.2	30.475	16.947	---	---	21.444	---	---	---	102.095	---	---	---	39.102	---	---	---
2020-09-01	12:12:46	14838	9yellow	290.93	---	---	---	18.617	---	---	---	1021.14	30.539	18.617	---	---	21.709	---	---	---	103.759	---	---	---	37.274	---	---	---
2020-09-01	12:12:47	14839	9yellow	267.69	---	---	---	20.288	---	---	---	1021.08	30.582	20.288	---	---	21.976	---	---	---	105.422	---	---	---	40.392	---	---	---
2020-09-01	12:12:48	14840	9yellow	267.13	---	---	---	20.297	---	---	---	1021.06	30.509	20.297	---	---	21.996	---	---	---	105.498	---	---	---	40.442	---	---	---
2020-09-01	12:12:49	14841	9yellow	266.78	---	---	---	20.303	---	---	---	1021.11	30.382	20.303	---	---	22.009	---	---	---	105.494	---	---	---	40.531	---	---	---
2020-09-01	12:12:50	14842	9yellow	266.95	---	---	---	20.303	---	---	---	1021.15	30.288	20.303	---	---	22.002	---	---	---	105.439	---	---	---	40.6	---	---	---
2020-09-01	12:12:51	14843	9yellow	267.32	---	---	---	20.299	---	---	---	1021.16	30.313	20.299	---	---	21.988	---	---	---	105.37	---	---	---	40.57	---	---	---
2020-09-01	12:12:52	14844	9yellow	267.76	---	---	---	20.29	---	---	---	1021.14	30.407	20.29	---	---	21.972	---	---	---	105.3	---	---	---	40.488	---	---	---
2020-09-01	12:12:53	14845	9yellow	268	---	---	---	20.29	---	---	---	1021.1	30.46	20.29	---	---	21.962	---	---	---	105.238	---	---	---	40.501	---	---	---
2020-09-01	12:12:54	14846	9yellow	268.24	---	---	---	20.292	---	---	---	1021.08	30.46	20.292	---	---	21.951	---	---	---	105.189	---	---	---	40.591	---	---	---
2020-09-01	12:12:55	14847	9yellow	268.43	---	---	---	20.302	---	---	---	1021.06	30.473	20.302	---	---	21.94	---	---	---	105.14	---	---	---	40.669	---	---	---
2020-09-01	12:12:56	14848	9yellow	268.49	---	---	---	20.308	---	---	---	1021.06	30.46	20.308	---	---	21.935	---	---	---	105.124	---	---	---	40.628	---	---	---
2020-09-01	12:12:57	14849	9yellow	268.22	---	---	---	20.316	---	---	---	1021.07	30.369	20.316	---	---	21.944	---	---	---	105.105	---	---	---	40.597	---	---	---
2020-09-01	12:12:58	14850	9yellow	268.1	---	---	---	20.321	---	---	---	1021.04	30.234	20.321	---	---	21.947	---	---	---	105.098	---	---	---	40.652	---	---	---
2020-09-01	12:12:59	14851	9yellow	268.21	---	---	---	20.326	---	---	---	1021.06	30.14	20.326	---	---	21.941	---	---	---	105.094	---	---	---	40.785	---	---	---
2020-09-01	12:13:00	14852	9yellow	268.38	---	---	---	20.328	---	---	---	1021.07	30.153	20.328	---	---	21.933	---	---	---	105.094	---	---	---	40.84	---	---	---
2020-09-01	14:46:53	24084.6	9yellow	252.05	---	---	---	17.12	---	---	---	1021.11	30.883	17.12	---	---	23.868	---	---	---	109.41	---	---	---	44.507	---	---	---
2020-09-01	14:46:54	24085.6	9yellow	239.16	---	---	---	18.72	---	---	---	1020.99	29.952	18.72	---	---	23.881	---	---	---	110.335	---	---	---	68.559	---	---	---
2020-09-01	14:46:55	24086.6	9yellow	226.65	---	---	---	20.314	---	---	---	1020.9	29.036	20.314	---	---	23.878	---	---	---	111.159	---	---	---	96.702	---	---	---
2020-09-01	14:46:56	24087.6	9yellow	226.95	---	---	---	20.295	---	---	---	1020.85	29.077	20.295	---	---	23.869	---	---	---	111.091	---	---	---	93.588	---	---	---
2020-09-01	14:46:57	24088.6	9yellow	227.06	---	---	---	20.274	---	---	---	1020.86	29.118	20.274	---	---	23.871	---	---	---	111.151	---	---	---	97.693	---	---	---
2020-09-01	14:46:58	24089.6	9yellow	227.02	---	---	---	20.256	---	---	---	1020.84	29.156	20.256	---	---	23.88	---	---	---	111.279	---	---	---	98.069	---	---	---
2020-09-01	14:46:59	24090.6	9yellow	227.12	---	---	---	20.249	---	---	---	1020.85	29.202	20.249	---	---	23.877	---	---	---	111.302	---	---	---	96.915	---	---	---
2020-09-01	14:47:00	24091.6	9yellow	227.23	---	---	---	20.248	---	---	---	1020.81	29.222	20.248	---	---	23.872	---	---	---	111.238	---	---	---	93.093	---	---	---
2020-09-01	14:47:01	24092.6	9yellow	227.02	---	---	---	20.253	---	---	---	1020.82	29.189	20.253	---	---	23.881	---	---	---	111.279	---	---	---	102.833	---	---	---
2020-09-01	14:47:02	24093.6	9yellow	226.94	---	---	---	20.261	---	---	---	1020.82	29.082	20.261	---	---	23.882	---	---	---	111.231	---	---	---	104.362	---	---	---
2020-09-01	14:47:03	24094.6	9yellow	227.21	---	---	---	20.271	---	---	---	1020.82	29.001	20.271	---	---	23.864	---	---	---	111.175	---	---	---	107.316	---	---	---
2020-09-01	14:47:04	24095.6	9yellow	227.78	---	---	---	20.282	---	---	---	1020.84	28.947	20.282	---	---	23.831	---	---	---	111.012	---	---	---	97.46	---	---	---
2020-09-01	14:47:05	24096.6	9yellow	228.58	---	---	---	20.293	---	---	---	1020.86	28.96	20.293	---	---	23.787	---	---	---	110.622	---	---	---	97.115	---	---	---
2020-09-01	14:47:06	24097.6	9yellow	228.31	---	---	---	20.307	---	---	---	1020.86	28.973	20.307	---	---	23.795	---	---	---	110.643	---	---	---	95.404	---	---	---
2020-09-01	14:47:07	24098.6	9yellow	227.94	---	---	---	20.325	---	---	---	1020.85	29.014	20.325	---	---	23.808	---	---	---	110.683	---	---	---	94.013	---	---	---
2020-09-01	14:47:08	24099.6	9yellow	226.93	---	---	---	20.342	---	---	---	1020.84	29.067	20.342	---	---	23.853	---	---	---	111.081	---	---	---	94.582	---	---	---
2020-09-01	14:47:09	24100.6	9yellow	226.26	---	---	---	20.36	---	---	---	1020.87	29.12	20.36	---	---	23.881	---	---	---	111.363	---	---	---	119.003	---	---	---
2020-09-01	14:47:10	24101.6	9yellow	226.02	---	---	---	20.37	---	---	---	1020.86	29.158	20.37	---	---	23.89	---	---	---	111.399	---	---	---	122.219	---	---	---

## Sheet: Oxygen_020920_Raw
***********	*************	*************	**************	*************	*************	*************	*************	*************	*************	*************	*************	*************	*************
Data	from	Pyro	Oxygen	Logger	V3.204	with	FireStingO2	(Firmware	3.10)	---	Pyro	Science	---	Device	Name:
***********	*************	*************	**************	*************	*************	*************	*************	*************	*************	*************	*************	*************	*************
Settings:	Description	Units	Basic Mode	Sensor Code	Meas. Mode	Temp. Comp.	Temp. (°C)	Press. Comp.	Press. (hPa)	Salinity (‰)	LED Int. (%)	PD Ampl.	Meas. Time (ms)	Bkdg. Comp.	Fiber Length (m)
Ch 1	Oxygen Sensor Spot, FTC (normal range)	umol/l	OFF	SA7-530-200	3	ON External	20	OFF	1013	0	0.1	200x	10	ON fiber length	2
Temp.	Sensor	Measuring	Time (ms):	300	Offset ('C):	0
Calibration:	Status 0% Cal.	Status upper Cal.	Temp. 0% Cal. (°C)	Temp. upper Cal. (°C)	Press. (hPa)	Humidity (%)	Oxygen (%O2)	dphi0 (°)	dphi100 (°)	f	m	F (Hz)	kt (%/K)	tt (%/K)	Bkgd. Int. (mV)	Bkgd. dphi (°)	mt (1/K)
Ch 1	0% Calibration	Air with 100% Humidity or Air Saturated Water	24.153	24.151	1019	100	20.95	53.163	20.881	0.85	0.081	4000	1.184	-0.07	0.811	0	-0.00037
Data	Smoothing:	3
Date:	2020-09-02
				Oxygen				Compensation	Temperature	('C)		Pressure	Humidity	Temp. Probe	Int. Temp.	Analog In	Raw Data:	dphi (°)			Signal	Intensity	(mV)		Ambient	Light	(mV)		Advanced Raw Values (only logged while raw data window is open)
Date	Time (HH:MM:SS)	Time (s)	Comment	Ch1	Ch2	Ch3	Ch4	Ch 1	Ch 2	Ch 3	Ch 4	(mbar)	(%)	('C)	('C)	(mV)	Ch 1	Ch 2	Ch 3	Ch 4	Ch1	Ch2	Ch3	Ch4	Ch1	Ch2	Ch3	Ch4	(MainBkgd->MainBkgd->MainPhi->RefAmpl->RefBkgnd->RefPhi)
2020-09-02	08:15:49	0	1green	318.63	---	---	---	15.257	---	---	---	1019.55	63.201	15.257	---	---	21.831	---	---	---	263.898	---	---	---	23.011	---	---	---
2020-09-02	08:15:50	1	1green	315.89	---	---	---	15.239	---	---	---	1019.49	62.71	15.239	---	---	21.936	---	---	---	187.96	---	---	---	22.263	---	---	---
2020-09-02	08:15:51	2	1green	312.78	---	---	---	15.221	---	---	---	1019.49	62.219	15.221	---	---	22.054	---	---	---	112.112	---	---	---	21.455	---	---	---
2020-09-02	08:15:52	3	1green	312.03	---	---	---	15.227	---	---	---	1019.45	62.201	15.227	---	---	22.079	---	---	---	112.222	---	---	---	21.456	---	---	---
2020-09-02	08:15:53	4	1green	311.41	---	---	---	15.229	---	---	---	1019.49	62.201	15.229	---	---	22.101	---	---	---	112.335	---	---	---	21.418	---	---	---
2020-09-02	08:15:54	5	1green	311.43	---	---	---	15.23	---	---	---	1019.5	62.201	15.23	---	---	22.1	---	---	---	112.354	---	---	---	21.452	---	---	---
2020-09-02	08:15:55	6	1green	312.08	---	---	---	15.228	---	---	---	1019.52	62.201	15.228	---	---	22.077	---	---	---	112.272	---	---	---	21.461	---	---	---
2020-09-02	08:15:56	7	1green	312.94	---	---	---	15.227	---	---	---	1019.51	62.181	15.227	---	---	22.046	---	---	---	112.164	---	---	---	21.496	---	---	---
2020-09-02	08:15:57	8	1green	313.41	---	---	---	15.227	---	---	---	1019.5	62.199	15.227	---	---	22.029	---	---	---	112.05	---	---	---	21.497	---	---	---
2020-09-02	08:15:58	9	1green	313.37	---	---	---	15.231	---	---	---	1019.5	62.237	15.231	---	---	22.029	---	---	---	112.025	---	---	---	21.505	---	---	---
2020-09-02	08:15:59	10	1green	313.02	---	---	---	15.232	---	---	---	1019.51	62.295	15.232	---	---	22.041	---	---	---	112.042	---	---	---	21.537	---	---	---
2020-09-02	08:16:00	11	1green	312.77	---	---	---	15.235	---	---	---	1019.53	62.343	15.235	---	---	22.049	---	---	---	112.092	---	---	---	21.6	---	---	---
2020-09-02	08:16:01	12	1green	312.77	---	---	---	15.234	---	---	---	1019.54	62.371	15.234	---	---	22.049	---	---	---	112.093	---	---	---	21.63	---	---	---
2020-09-02	08:16:02	13	1green	313.17	---	---	---	15.233	---	---	---	1019.54	62.399	15.233	---	---	22.035	---	---	---	112.044	---	---	---	19.694	---	---	---
2020-09-02	08:16:03	14	1green	313.35	---	---	---	15.231	---	---	---	1019.53	62.41	15.231	---	---	22.03	---	---	---	111.982	---	---	---	18.312	---	---	---
2020-09-02	08:16:04	15	1green	313.4	---	---	---	15.231	---	---	---	1019.53	62.43	15.231	---	---	22.028	---	---	---	111.941	---	---	---	16.636	---	---	---
2020-09-02	08:16:05	16	1green	313.22	---	---	---	15.231	---	---	---	1019.52	62.44	15.231	---	---	22.034	---	---	---	111.948	---	---	---	16.863	---	---	---
2020-09-02	08:16:06	17	1green	313.35	---	---	---	15.232	---	---	---	1019.53	62.43	15.232	---	---	22.029	---	---	---	111.971	---	---	---	18.248	---	---	---
2020-09-02	08:16:07	18	1green	313.29	---	---	---	15.231	---	---	---	1019.5	62.409	15.231	---	---	22.032	---	---	---	112.015	---	---	---	19.989	---	---	---
2020-09-02	08:16:08	19	1green	313.35	---	---	---	15.229	---	---	---	1019.51	62.389	15.229	---	---	22.03	---	---	---	112.05	---	---	---	21.728	---	---	---
2020-09-02	08:16:09	20	1green	313.48	---	---	---	15.228	---	---	---	1019.5	62.389	15.228	---	---	22.026	---	---	---	112.058	---	---	---	21.749	---	---	---
2020-09-02	08:16:10	21	1green	313.58	---	---	---	15.224	---	---	---	1019.55	62.389	15.224	---	---	22.024	---	---	---	112.057	---	---	---	21.761	---	---	---
2020-09-02	08:16:11	22	1green	313.64	---	---	---	15.226	---	---	---	1019.52	62.389	15.226	---	---	22.021	---	---	---	112.037	---	---	---	21.755	---	---	---
2020-09-02	08:16:12	23	1green	313.45	---	---	---	15.226	---	---	---	1019.5	62.389	15.226	---	---	22.028	---	---	---	112.038	---	---	---	21.735	---	---	---
2020-09-02	08:16:13	24	1green	313.43	---	---	---	15.228	---	---	---	1019.45	62.379	15.228	---	---	22.028	---	---	---	112.038	---	---	---	21.715	---	---	---
2020-09-02	08:16:14	25	1green	313.36	---	---	---	15.227	---	---	---	1019.5	62.369	15.227	---	---	22.031	---	---	---	112.051	---	---	---	21.718	---	---	---
2020-09-02	08:16:15	26	1green	313.52	---	---	---	15.227	---	---	---	1019.52	62.351	15.227	---	---	22.025	---	---	---	112.062	---	---	---	21.659	---	---	---
2020-09-02	08:16:16	27	1green	313.33	---	---	---	15.227	---	---	---	1019.56	62.344	15.227	---	---	22.032	---	---	---	112.072	---	---	---	21.685	---	---	---
2020-09-02	08:16:17	28	1green	313.28	---	---	---	15.226	---	---	---	1019.53	62.354	15.226	---	---	22.034	---	---	---	112.093	---	---	---	21.619	---	---	---
2020-09-02	08:16:49	60.18	1white	313.67	---	---	---	15.217	---	---	---	1019.54	62.361	15.217	---	---	22.023	---	---	---	111.995	---	---	---	23.445	---	---	---
2020-09-02	08:16:50	61.18	1white	314.28	---	---	---	15.209	---	---	---	1019.52	62.369	15.209	---	---	22.004	---	---	---	111.901	---	---	---	25.255	---	---	---
2020-09-02	08:16:51	62.18	1white	314.85	---	---	---	15.202	---	---	---	1019.51	62.369	15.202	---	---	21.986	---	---	---	111.803	---	---	---	27.244	---	---	---
2020-09-02	08:16:52	63.18	1white	314.86	---	---	---	15.206	---	---	---	1019.47	62.41	15.206	---	---	21.985	---	---	---	111.804	---	---	---	27.272	---	---	---
2020-09-02	08:16:53	64.18	1white	315.04	---	---	---	15.207	---	---	---	1019.46	62.468	15.207	---	---	21.978	---	---	---	111.802	---	---	---	27.335	---	---	---
2020-09-02	08:16:54	65.18	1white	315.13	---	---	---	15.21	---	---	---	1019.49	62.516	15.21	---	---	21.973	---	---	---	111.794	---	---	---	27.241	---	---	---
2020-09-02	08:16:55	66.18	1white	315.13	---	---	---	15.21	---	---	---	1019.5	62.534	15.21	---	---	21.973	---	---	---	111.8	---	---	---	27.348	---	---	---
2020-09-02	08:16:56	67.18	1white	315.18	---	---	---	15.212	---	---	---	1019.51	62.544	15.212	---	---	21.971	---	---	---	111.801	---	---	---	27.426	---	---	---
2020-09-02	08:16:57	68.18	1white	315.31	---	---	---	15.209	---	---	---	1019.49	62.555	15.209	---	---	21.967	---	---	---	111.8	---	---	---	27.559	---	---	---
2020-09-02	08:16:58	69.18	1white	315.5	---	---	---	15.212	---	---	---	1019.49	62.565	15.212	---	---	21.959	---	---	---	111.792	---	---	---	27.658	---	---	---
2020-09-02	08:16:59	70.18	1white	315.34	---	---	---	15.213	---	---	---	1019.48	62.555	15.213	---	---	21.965	---	---	---	111.794	---	---	---	27.619	---	---	---
2020-09-02	08:17:00	71.18	1white	315.07	---	---	---	15.215	---	---	---	1019.49	62.534	15.215	---	---	21.973	---	---	---	111.797	---	---	---	27.545	---	---	---
2020-09-02	08:17:01	72.18	1white	315	---	---	---	15.214	---	---	---	1019.48	62.496	15.214	---	---	21.977	---	---	---	111.809	---	---	---	27.43	---	---	---
2020-09-02	08:17:02	73.18	1white	315.07	---	---	---	15.214	---	---	---	1019.49	62.448	15.214	---	---	21.974	---	---	---	111.807	---	---	---	27.406	---	---	---
2020-09-02	08:17:03	74.18	1white	315.1	---	---	---	15.213	---	---	---	1019.48	62.399	15.213	---	---	21.973	---	---	---	111.811	---	---	---	27.437	---	---	---
2020-09-02	08:17:04	75.18	1white	315	---	---	---	15.214	---	---	---	1019.49	62.369	15.214	---	---	21.976	---	---	---	111.821	---	---	---	27.409	---	---	---
2020-09-02	08:17:05	76.18	1white	314.97	---	---	---	15.215	---	---	---	1019.44	62.359	15.215	---	---	21.977	---	---	---	111.823	---	---	---	27.496	---	---	---
2020-09-02	08:17:06	77.18	1white	315.07	---	---	---	15.217	---	---	---	1019.45	62.369	15.217	---	---	21.973	---	---	---	111.821	---	---	---	27.47	---	---	---
2020-09-02	08:17:07	78.18	1white	315.08	---	---	---	15.217	---	---	---	1019.46	62.379	15.217	---	---	21.972	---	---	---	111.808	---	---	---	27.521	---	---	---
2020-09-02	08:17:08	79.18	1white	314.95	---	---	---	15.214	---	---	---	1019.48	62.399	15.214	---	---	21.978	---	---	---	111.808	---	---	---	27.395	---	---	---
2020-09-02	08:17:59	129.97	1yellow	313.51	---	---	---	15.209	---	---	---	1019.5	62.689	15.209	---	---	22.032	---	---	---	112.03	---	---	---	27.01	---	---	---
2020-09-02	08:18:00	130.97	1yellow	312.16	---	---	---	15.204	---	---	---	1019.52	62.979	15.204	---	---	22.083	---	---	---	112.262	---	---	---	26.633	---	---	---
2020-09-02	08:18:01	131.97	1yellow	310.84	---	---	---	15.203	---	---	---	1019.55	63.249	15.203	---	---	22.131	---	---	---	112.511	---	---	---	26.328	---	---	---
2020-09-02	08:18:02	132.97	1yellow	311.04	---	---	---	15.205	---	---	---	1019.51	63.231	15.205	---	---	22.123	---	---	---	112.526	---	---	---	26.333	---	---	---
2020-09-02	08:18:03	133.97	1yellow	311.25	---	---	---	15.208	---	---	---	1019.51	63.214	15.208	---	---	22.115	---	---	---	112.596	---	---	---	26.351	---	---	---
2020-09-02	08:18:04	134.97	1yellow	310.78	---	---	---	15.207	---	---	---	1019.5	63.186	15.207	---	---	22.132	---	---	---	112.743	---	---	---	26.133	---	---	---
2020-09-02	08:18:05	135.97	1yellow	310.28	---	---	---	15.211	---	---	---	1019.49	63.165	15.211	---	---	22.149	---	---	---	112.927	---	---	---	24.468	---	---	---
2020-09-02	08:18:06	136.97	1yellow	309.77	---	---	---	15.209	---	---	---	1019.5	63.145	15.209	---	---	22.169	---	---	---	113.041	---	---	---	22.975	---	---	---
2020-09-02	08:18:07	137.97	1yellow	309.99	---	---	---	15.211	---	---	---	1019.5	63.125	15.211	---	---	22.16	---	---	---	113.05	---	---	---	21.658	---	---	---
2020-09-02	08:18:08	138.97	1yellow	310.11	---	---	---	15.211	---	---	---	1019.52	63.104	15.211	---	---	22.155	---	---	---	112.952	---	---	---	23.287	---	---	---
2020-09-02	08:18:09	139.97	1yellow	309.91	---	---	---	15.214	---	---	---	1019.51	63.084	15.214	---	---	22.162	---	---	---	112.873	---	---	---	24.531	---	---	---
2020-09-02	08:18:10	140.97	1yellow	310.15	---	---	---	15.215	---	---	---	1019.53	63.094	15.215	---	---	22.152	---	---	---	112.769	---	---	---	25.98	---	---	---
2020-09-02	08:18:11	141.97	1yellow	309.88	---	---	---	15.213	---	---	---	1019.57	63.094	15.213	---	---	22.163	---	---	---	112.761	---	---	---	25.993	---	---	---
2020-09-02	08:18:12	142.97	1yellow	310	---	---	---	15.213	---	---	---	1019.58	63.086	15.213	---	---	22.159	---	---	---	112.765	---	---	---	26.135	---	---	---
2020-09-02	08:18:13	143.97	1yellow	309.54	---	---	---	15.214	---	---	---	1019.54	63.058	15.214	---	---	22.175	---	---	---	112.881	---	---	---	26.145	---	---	---
2020-09-02	08:18:14	144.97	1yellow	309.54	---	---	---	15.215	---	---	---	1019.51	63.04	15.215	---	---	22.175	---	---	---	112.951	---	---	---	26.133	---	---	---
2020-09-02	08:18:15	145.97	1yellow	309.49	---	---	---	15.215	---	---	---	1019.47	63.03	15.215	---	---	22.176	---	---	---	112.945	---	---	---	26.179	---	---	---
2020-09-02	08:18:16	146.97	1yellow	309.77	---	---	---	15.213	---	---	---	1019.52	63.03	15.213	---	---	22.167	---	---	---	112.822	---	---	---	26.077	---	---	---
2020-09-02	08:18:17	147.97	1yellow	310.3	---	---	---	15.213	---	---	---	1019.51	63.03	15.213	---	---	22.147	---	---	---	112.708	---	---	---	25.976	---	---	---
2020-09-02	08:18:18	148.97	1yellow	310.66	---	---	---	15.21	---	---	---	1019.48	63.02	15.21	---	---	22.135	---	---	---	112.652	---	---	---	25.829	---	---	---
2020-09-02	08:18:19	149.97	1yellow	310.54	---	---	---	15.21	---	---	---	1019.44	63	15.21	---	---	22.14	---	---	---	112.664	---	---	---	25.758	---	---	---
2020-09-02	08:18:20	150.97	1yellow	310.24	---	---	---	15.207	---	---	---	1019.42	62.979	15.207	---	---	22.152	---	---	---	112.716	---	---	---	25.729	---	---	---
2020-09-02	08:18:21	151.97	1yellow	310.02	---	---	---	15.208	---	---	---	1019.42	62.979	15.208	---	---	22.16	---	---	---	112.739	---	---	---	25.786	---	---	---
2020-09-02	08:18:22	152.97	1yellow	310.2	---	---	---	15.207	---	---	---	1019.43	62.979	15.207	---	---	22.153	---	---	---	112.725	---	---	---	25.816	---	---	---
2020-09-02	08:23:55	486.03	1orange	312	---	---	---	15.205	---	---	---	1019.45	63.381	15.205	---	---	22.089	---	---	---	112.236	---	---	---	21.295	---	---	---
2020-09-02	08:23:56	487.03	1orange	313.91	---	---	---	15.204	---	---	---	1019.47	63.773	15.204	---	---	22.02	---	---	---	111.781	---	---	---	16.732	---	---	---
2020-09-02	08:23:57	488.03	1orange	315.78	---	---	---	15.202	---	---	---	1019.44	64.157	15.202	---	---	21.953	---	---	---	111.338	---	---	---	12.224	---	---	---
2020-09-02	08:23:58	489.03	1orange	316	---	---	---	15.206	---	---	---	1019.43	64.119	15.206	---	---	21.944	---	---	---	111.341	---	---	---	12.214	---	---	---
2020-09-02	08:23:59	490.03	1orange	316.12	---	---	---	15.204	---	---	---	1019.42	64.073	15.204	---	---	21.94	---	---	---	111.326	---	---	---	12.214	---	---	---
2020-09-02	08:24:00	491.03	1orange	316.21	---	---	---	15.201	---	---	---	1019.42	64.024	15.201	---	---	21.938	---	---	---	111.326	---	---	---	12.215	---	---	---
2020-09-02	08:24:01	492.03	1orange	315.95	---	---	---	15.196	---	---	---	1019.41	63.996	15.196	---	---	21.949	---	---	---	111.349	---	---	---	12.235	---	---	---
2020-09-02	08:24:02	493.03	1orange	315.95	---	---	---	15.196	---	---	---	1019.45	63.956	15.196	---	---	21.949	---	---	---	111.369	---	---	---	12.245	---	---	---
2020-09-02	08:24:03	494.03	1orange	315.96	---	---	---	15.195	---	---	---	1019.47	63.928	15.195	---	---	21.949	---	---	---	111.38	---	---	---	12.258	---	---	---
2020-09-02	08:24:04	495.03	1orange	316.07	---	---	---	15.193	---	---	---	1019.47	63.89	15.193	---	---	21.946	---	---	---	111.382	---	---	---	12.265	---	---	---
2020-09-02	08:24:05	496.03	1orange	316.01	---	---	---	15.19	---	---	---	1019.43	63.862	15.19	---	---	21.949	---	---	---	111.405	---	---	---	12.253	---	---	---
2020-09-02	08:24:06	497.03	1orange	316	---	---	---	15.193	---	---	---	1019.41	63.841	15.193	---	---	21.948	---	---	---	111.416	---	---	---	12.252	---	---	---
2020-09-02	08:24:07	498.03	1orange	315.99	---	---	---	15.195	---	---	---	1019.42	63.821	15.195	---	---	21.948	---	---	---	111.433	---	---	---	12.244	---	---	---
2020-09-02	08:24:08	499.03	1orange	315.87	---	---	---	15.194	---	---	---	1019.46	63.811	15.194	---	---	21.953	---	---	---	111.426	---	---	---	12.272	---	---	---
2020-09-02	08:24:09	500.03	1orange	315.72	---	---	---	15.192	---	---	---	1019.47	63.801	15.192	---	---	21.959	---	---	---	111.425	---	---	---	12.297	---	---	---
2020-09-02	08:24:10	501.03	1orange	315.69	---	---	---	15.193	---	---	---	1019.44	63.801	15.193	---	---	21.959	---	---	---	111.427	---	---	---	12.292	---	---	---
2020-09-02	08:24:11	502.03	1orange	315.78	---	---	---	15.195	---	---	---	1019.44	63.811	15.195	---	---	21.955	---	---	---	111.433	---	---	---	12.281	---	---	---
2020-09-02	08:24:12	503.03	1orange	315.94	---	---	---	15.195	---	---	---	1019.42	63.821	15.195	---	---	21.95	---	---	---	111.448	---	---	---	12.253	---	---	---
2020-09-02	08:24:48	538.89	1red	314.78	---	---	---	15.192	---	---	---	1019.45	63.851	15.192	---	---	21.993	---	---	---	111.776	---	---	---	13.311	---	---	---
2020-09-02	08:24:49	539.89	1red	313.63	---	---	---	15.194	---	---	---	1019.43	63.879	15.194	---	---	22.034	---	---	---	112.087	---	---	---	14.302	---	---	---
2020-09-02	08:24:50	540.89	1red	312.19	---	---	---	15.195	---	---	---	1019.44	63.928	15.195	---	---	22.085	---	---	---	112.398	---	---	---	15.385	---	---	---
2020-09-02	08:24:51	541.89	1red	312.21	---	---	---	15.199	---	---	---	1019.43	63.956	15.199	---	---	22.083	---	---	---	112.395	---	---	---	15.38	---	---	---
2020-09-02	08:24:52	542.89	1red	312.1	---	---	---	15.201	---	---	---	1019.43	63.996	15.201	---	---	22.086	---	---	---	112.396	---	---	---	15.403	---	---	---
2020-09-02	08:24:53	543.89	1red	312.12	---	---	---	15.203	---	---	---	1019.49	64.017	15.203	---	---	22.085	---	---	---	112.396	---	---	---	15.321	---	---	---
2020-09-02	08:24:54	544.89	1red	312.15	---	---	---	15.205	---	---	---	1019.48	64.055	15.205	---	---	22.083	---	---	---	112.374	---	---	---	15.262	---	---	---
2020-09-02	08:24:55	545.89	1red	312.03	---	---	---	15.205	---	---	---	1019.48	64.093	15.205	---	---	22.087	---	---	---	112.385	---	---	---	15.245	---	---	---
2020-09-02	08:24:56	546.89	1red	312.03	---	---	---	15.203	---	---	---	1019.4	64.121	15.203	---	---	22.088	---	---	---	112.396	---	---	---	15.263	---	---	---
2020-09-02	08:24:57	547.89	1red	311.88	---	---	---	15.202	---	---	---	1019.41	64.131	15.202	---	---	22.094	---	---	---	112.413	---	---	---	15.291	---	---	---
2020-09-02	08:24:58	548.89	1red	311.93	---	---	---	15.201	---	---	---	1019.42	64.131	15.201	---	---	22.093	---	---	---	112.418	---	---	---	15.266	---	---	---
2020-09-02	08:24:59	549.89	1red	312.08	---	---	---	15.201	---	---	---	1019.44	64.18	15.201	---	---	22.087	---	---	---	112.432	---	---	---	15.258	---	---	---
2020-09-02	08:25:00	550.89	1red	312.18	---	---	---	15.198	---	---	---	1019.43	64.266	15.198	---	---	22.085	---	---	---	112.461	---	---	---	15.286	---	---	---
2020-09-02	08:25:01	551.89	1red	312.29	---	---	---	15.196	---	---	---	1019.43	64.363	15.196	---	---	22.081	---	---	---	112.484	---	---	---	15.418	---	---	---
2020-09-02	08:25:02	552.89	1red	312.03	---	---	---	15.193	---	---	---	1019.42	64.439	15.193	---	---	22.092	---	---	---	112.473	---	---	---	15.466	---	---	---
2020-09-02	08:25:03	553.89	1red	311.96	---	---	---	15.194	---	---	---	1019.42	64.477	15.194	---	---	22.094	---	---	---	112.464	---	---	---	15.498	---	---	---
2020-09-02	08:25:04	554.89	1red	311.81	---	---	---	15.193	---	---	---	1019.41	64.495	15.193	---	---	22.1	---	---	---	112.449	---	---	---	15.514	---	---	---
2020-09-02	08:25:05	555.89	1red	311.86	---	---	---	15.194	---	---	---	1019.45	64.477	15.194	---	---	22.098	---	---	---	112.459	---	---	---	15.035	---	---	---
2020-09-02	08:25:06	556.89	1red	311.79	---	---	---	15.192	---	---	---	1019.44	64.449	15.192	---	---	22.101	---	---	---	112.444	---	---	---	14.557	---	---	---
2020-09-02	08:25:07	557.89	1red	311.9	---	---	---	15.19	---	---	---	1019.44	64.411	15.19	---	---	22.098	---	---	---	112.444	---	---	---	14.015	---	---	---
2020-09-02	08:25:08	558.89	1red	311.92	---	---	---	15.19	---	---	---	1019.42	64.381	15.19	---	---	22.097	---	---	---	112.452	---	---	---	13.91	---	---	---
2020-09-02	08:25:09	559.89	1red	311.81	---	---	---	15.19	---	---	---	1019.42	64.36	15.19	---	---	22.101	---	---	---	112.464	---	---	---	13.776	---	---	---
2020-09-02	08:25:10	560.89	1red	311.81	---	---	---	15.191	---	---	---	1019.44	64.36	15.191	---	---	22.101	---	---	---	112.454	---	---	---	13.639	---	---	---
2020-09-02	08:25:11	561.89	1red	311.8	---	---	---	15.19	---	---	---	1019.43	64.371	15.19	---	---	22.101	---	---	---	112.456	---	---	---	13.559	---	---	---
2020-09-02	08:25:12	562.89	1red	311.79	---	---	---	15.189	---	---	---	1019.46	64.391	15.189	---	---	22.102	---	---	---	112.473	---	---	---	13.475	---	---	---
2020-09-02	08:25:13	563.89	1red	311.6	---	---	---	15.189	---	---	---	1019.43	64.381	15.189	---	---	22.109	---	---	---	112.496	---	---	---	13.409	---	---	---
2020-09-02	08:25:50	601.6	1blue	312.81	---	---	---	15.183	---	---	---	1019.45	64.457	15.183	---	---	22.068	---	---	---	112.243	---	---	---	16.656	---	---	---
2020-09-02	08:25:51	602.61	1blue	314.35	---	---	---	15.179	---	---	---	1019.43	64.495	15.179	---	---	22.013	---	---	---	111.935	---	---	---	17.321	---	---	---
2020-09-02	08:25:52	603.6	1blue	315.72	---	---	---	15.175	---	---	---	1019.4	64.516	15.175	---	---	21.965	---	---	---	111.672	---	---	---	17.7	---	---	---
2020-09-02	08:25:53	604.6	1blue	315.86	---	---	---	15.179	---	---	---	1019.38	64.419	15.179	---	---	21.959	---	---	---	111.64	---	---	---	14.859	---	---	---
2020-09-02	08:25:54	605.6	1blue	315.71	---	---	---	15.182	---	---	---	1019.36	64.343	15.182	---	---	21.963	---	---	---	111.664	---	---	---	14.623	---	---	---
2020-09-02	08:25:55	606.6	1blue	315.59	---	---	---	15.182	---	---	---	1019.41	64.294	15.182	---	---	21.967	---	---	---	111.648	---	---	---	14.937	---	---	---
2020-09-02	08:25:56	607.61	1blue	315.45	---	---	---	15.182	---	---	---	1019.41	64.276	15.182	---	---	21.972	---	---	---	111.686	---	---	---	17.577	---	---	---
2020-09-02	08:25:57	608.6	1blue	315.62	---	---	---	15.183	---	---	---	1019.42	64.266	15.183	---	---	21.966	---	---	---	111.712	---	---	---	19.425	---	---	---
2020-09-02	08:25:58	609.6	1blue	315.83	---	---	---	15.184	---	---	---	1019.41	64.256	15.184	---	---	21.958	---	---	---	111.749	---	---	---	21.87	---	---	---
2020-09-02	08:25:59	610.6	1blue	315.9	---	---	---	15.184	---	---	---	1019.39	64.236	15.184	---	---	21.956	---	---	---	111.702	---	---	---	18.949	---	---	---
2020-09-02	08:26:00	611.6	1blue	315.76	---	---	---	15.183	---	---	---	1019.41	64.215	15.183	---	---	21.961	---	---	---	111.67	---	---	---	16.648	---	---	---
2020-09-02	08:26:01	612.6	1blue	315.42	---	---	---	15.184	---	---	---	1019.41	64.225	15.184	---	---	21.973	---	---	---	111.672	---	---	---	16.201	---	---	---
2020-09-02	08:26:02	613.6	1blue	315.38	---	---	---	15.184	---	---	---	1019.42	64.256	15.184	---	---	21.974	---	---	---	111.708	---	---	---	19.183	---	---	---
2020-09-02	08:26:03	614.6	1blue	315.63	---	---	---	15.181	---	---	---	1019.4	64.276	15.181	---	---	21.967	---	---	---	111.733	---	---	---	22.447	---	---	---
2020-09-02	08:26:04	615.6	1blue	315.9	---	---	---	15.181	---	---	---	1019.38	64.276	15.181	---	---	21.957	---	---	---	111.724	---	---	---	23.021	---	---	---
2020-09-02	08:26:05	616.6	1blue	316.15	---	---	---	15.18	---	---	---	1019.37	64.266	15.18	---	---	21.948	---	---	---	111.716	---	---	---	23.191	---	---	---
2020-09-02	08:26:06	617.6	1blue	316.26	---	---	---	15.181	---	---	---	1019.38	64.266	15.181	---	---	21.944	---	---	---	111.716	---	---	---	23.211	---	---	---
2020-09-02	08:26:07	618.6	1blue	316.4	---	---	---	15.18	---	---	---	1019.37	64.256	15.18	---	---	21.939	---	---	---	111.7	---	---	---	23.44	---	---	---
2020-09-02	08:26:08	619.6	1blue	316.51	---	---	---	15.18	---	---	---	1019.38	64.256	15.18	---	---	21.935	---	---	---	111.7	---	---	---	23.264	---	---	---
2020-09-02	08:26:09	620.6	1blue	316.47	---	---	---	15.179	---	---	---	1019.38	64.266	15.179	---	---	21.937	---	---	---	111.699	---	---	---	23.352	---	---	---
2020-09-02	08:26:10	621.6	1blue	316.38	---	---	---	15.18	---	---	---	1019.39	64.287	15.18	---	---	21.94	---	---	---	111.708	---	---	---	23.05	---	---	---
2020-09-02	08:26:11	622.6	1blue	316.05	---	---	---	15.181	---	---	---	1019.42	64.297	15.181	---	---	21.951	---	---	---	111.695	---	---	---	23.564	---	---	---
2020-09-02	08:26:12	623.6	1blue	315.9	---	---	---	15.182	---	---	---	1019.42	64.305	15.182	---	---	21.956	---	---	---	111.684	---	---	---	23.544	---	---	---
2020-09-02	08:26:13	624.6	1blue	316.07	---	---	---	15.181	---	---	---	1019.45	64.333	15.181	---	---	21.95	---	---	---	111.668	---	---	---	23.774	---	---	---
2020-09-02	08:26:14	625.6	1blue	316.22	---	---	---	15.18	---	---	---	1019.44	64.361	15.18	---	---	21.946	---	---	---	111.687	---	---	---	23.163	---	---	---
2020-09-02	08:26:15	626.6	1blue	316.16	---	---	---	15.181	---	---	---	1019.46	64.401	15.181	---	---	21.947	---	---	---	111.67	---	---	---	22.787	---	---	---
2020-09-02	08:26:16	627.6	1blue	316.29	---	---	---	15.18	---	---	---	1019.44	64.422	15.18	---	---	21.943	---	---	---	111.651	---	---	---	22.34	---	---	---
2020-09-02	08:26:17	628.6	1blue	316.28	---	---	---	15.182	---	---	---	1019.42	64.432	15.182	---	---	21.943	---	---	---	111.644	---	---	---	22.177	---	---	---
2020-09-02	08:26:18	629.6	1blue	316.28	---	---	---	15.183	---	---	---	1019.4	64.401	15.183	---	---	21.942	---	---	---	111.608	---	---	---	20.446	---	---	---
2020-09-02	08:26:19	630.6	1blue	316.33	---	---	---	15.185	---	---	---	1019.41	64.36	15.185	---	---	21.94	---	---	---	111.614	---	---	---	20.185	---	---	---
2020-09-02	08:46:39	1850.67	11yellow	303.26	---	---	---	16.882	---	---	---	1019.47	65.792	16.882	---	---	21.824	---	---	---	111.837	---	---	---	16.343	---	---	---
2020-09-02	08:46:40	1851.67	11yellow	290.6	---	---	---	18.58	---	---	---	1019.47	67.245	18.58	---	---	21.691	---	---	---	112.127	---	---	---	14.174	---	---	---
2020-09-02	08:46:41	1852.67	11yellow	277.61	---	---	---	20.279	---	---	---	1019.49	68.697	20.279	---	---	21.57	---	---	---	112.388	---	---	---	10.488	---	---	---
2020-09-02	08:46:42	1853.67	11yellow	277.75	---	---	---	20.279	---	---	---	1019.45	68.697	20.279	---	---	21.564	---	---	---	112.394	---	---	---	10.511	---	---	---
2020-09-02	08:46:43	1854.67	11yellow	277.44	---	---	---	20.28	---	---	---	1019.45	68.732	20.28	---	---	21.576	---	---	---	112.388	---	---	---	10.46	---	---	---
2020-09-02	08:46:44	1855.67	11yellow	277.23	---	---	---	20.28	---	---	---	1019.41	68.778	20.28	---	---	21.585	---	---	---	112.38	---	---	---	10.551	---	---	---
2020-09-02	08:46:45	1856.67	11yellow	277.44	---	---	---	20.283	---	---	---	1019.38	68.803	20.283	---	---	21.575	---	---	---	112.382	---	---	---	10.919	---	---	---
2020-09-02	08:46:46	1857.67	11yellow	277.53	---	---	---	20.283	---	---	---	1019.38	68.775	20.283	---	---	21.572	---	---	---	112.39	---	---	---	11.293	---	---	---
2020-09-02	08:46:47	1858.67	11yellow	277.52	---	---	---	20.284	---	---	---	1019.41	68.74	20.284	---	---	21.572	---	---	---	112.394	---	---	---	11.556	---	---	---
2020-09-02	08:46:48	1859.67	11yellow	277.51	---	---	---	20.287	---	---	---	1019.44	68.696	20.287	---	---	21.571	---	---	---	112.394	---	---	---	11.55	---	---	---
2020-09-02	08:46:49	1860.67	11yellow	277.58	---	---	---	20.292	---	---	---	1019.45	68.653	20.292	---	---	21.567	---	---	---	112.389	---	---	---	11.692	---	---	---
2020-09-02	08:46:50	1861.67	11yellow	277.68	---	---	---	20.297	---	---	---	1019.45	68.597	20.297	---	---	21.561	---	---	---	112.388	---	---	---	11.812	---	---	---
2020-09-02	08:46:51	1862.67	11yellow	277.59	---	---	---	20.298	---	---	---	1019.45	68.541	20.298	---	---	21.564	---	---	---	112.391	---	---	---	11.874	---	---	---
2020-09-02	08:46:52	1863.67	11yellow	277.53	---	---	---	20.295	---	---	---	1019.45	68.478	20.295	---	---	21.568	---	---	---	112.376	---	---	---	11.772	---	---	---
2020-09-02	08:46:53	1864.67	11yellow	277.51	---	---	---	20.294	---	---	---	1019.43	68.442	20.294	---	---	21.569	---	---	---	112.349	---	---	---	11.678	---	---	---
2020-09-02	08:46:54	1865.67	11yellow	277.61	---	---	---	20.292	---	---	---	1019.4	68.424	20.292	---	---	21.565	---	---	---	112.323	---	---	---	11.593	---	---	---
2020-09-02	08:46:55	1866.67	11yellow	277.72	---	---	---	20.295	---	---	---	1019.39	68.414	20.295	---	---	21.56	---	---	---	112.319	---	---	---	11.559	---	---	---
2020-09-02	08:46:56	1867.67	11yellow	277.73	---	---	---	20.293	---	---	---	1019.39	68.389	20.293	---	---	21.56	---	---	---	112.335	---	---	---	11.55	---	---	---
2020-09-02	08:46:57	1868.67	11yellow	277.65	---	---	---	20.291	---	---	---	1019.43	68.353	20.291	---	---	21.564	---	---	---	112.34	---	---	---	11.583	---	---	---
2020-09-02	08:46:58	1869.67	11yellow	277.56	---	---	---	20.292	---	---	---	1019.42	68.363	20.292	---	---	21.568	---	---	---	112.358	---	---	---	11.592	---	---	---
2020-09-02	08:46:59	1870.67	11yellow	277.49	---	---	---	20.296	---	---	---	1019.43	68.406	20.296	---	---	21.569	---	---	---	112.345	---	---	---	11.608	---	---	---
2020-09-02	08:47:00	1871.67	11yellow	277.65	---	---	---	20.302	---	---	---	1019.4	68.478	20.302	---	---	21.561	---	---	---	112.331	---	---	---	11.61	---	---	---
2020-09-02	08:47:01	1872.67	11yellow	277.81	---	---	---	20.306	---	---	---	1019.38	68.549	20.306	---	---	21.553	---	---	---	112.285	---	---	---	11.592	---	---	---
2020-09-02	08:47:02	1873.67	11yellow	278.19	---	---	---	20.306	---	---	---	1019.41	68.605	20.306	---	---	21.537	---	---	---	112.285	---	---	---	11.312	---	---	---
2020-09-02	08:47:03	1874.67	11yellow	278.15	---	---	---	20.307	---	---	---	1019.42	68.633	20.307	---	---	21.539	---	---	---	112.299	---	---	---	11.083	---	---	---
2020-09-02	08:47:38	1908.83	11red	278.83	---	---	---	20.295	---	---	---	1019.44	68.867	20.295	---	---	21.516	---	---	---	112.177	---	---	---	16.12	---	---	---
2020-09-02	08:47:39	1909.83	11red	279.21	---	---	---	20.283	---	---	---	1019.39	69.081	20.283	---	---	21.505	---	---	---	112.049	---	---	---	21.093	---	---	---
2020-09-02	08:47:40	1910.83	11red	279.9	---	---	---	20.269	---	---	---	1019.41	69.287	20.269	---	---	21.482	---	---	---	111.913	---	---	---	25.72	---	---	---
2020-09-02	08:47:41	1911.83	11red	279.92	---	---	---	20.268	---	---	---	1019.41	69.259	20.268	---	---	21.481	---	---	---	111.939	---	---	---	24.837	---	---	---
2020-09-02	08:47:42	1912.83	11red	279.94	---	---	---	20.275	---	---	---	1019.42	69.231	20.275	---	---	21.478	---	---	---	111.918	---	---	---	25.016	---	---	---
2020-09-02	08:47:43	1913.83	11red	279.76	---	---	---	20.284	---	---	---	1019.4	69.22	20.284	---	---	21.482	---	---	---	111.926	---	---	---	25.621	---	---	---
2020-09-02	08:47:44	1914.83	11red	279.69	---	---	---	20.292	---	---	---	1019.41	69.228	20.292	---	---	21.482	---	---	---	111.908	---	---	---	26.554	---	---	---
2020-09-02	08:47:45	1915.83	11red	279.67	---	---	---	20.296	---	---	---	1019.41	69.266	20.296	---	---	21.482	---	---	---	111.923	---	---	---	26.287	---	---	---
2020-09-02	08:47:46	1916.83	11red	279.78	---	---	---	20.296	---	---	---	1019.39	69.312	20.296	---	---	21.477	---	---	---	111.906	---	---	---	22.709	---	---	---
2020-09-02	08:47:47	1917.83	11red	279.74	---	---	---	20.295	---	---	---	1019.41	69.358	20.295	---	---	21.479	---	---	---	111.933	---	---	---	21.609	---	---	---
2020-09-02	08:47:48	1918.83	11red	279.68	---	---	---	20.293	---	---	---	1019.4	69.383	20.293	---	---	21.482	---	---	---	111.963	---	---	---	21.279	---	---	---
2020-09-02	08:47:49	1919.83	11red	279.63	---	---	---	20.291	---	---	---	1019.43	69.401	20.291	---	---	21.485	---	---	---	111.971	---	---	---	24.589	---	---	---
2020-09-02	08:47:50	1920.83	11red	279.58	---	---	---	20.288	---	---	---	1019.43	69.401	20.288	---	---	21.488	---	---	---	111.943	---	---	---	25.158	---	---	---
2020-09-02	08:47:51	1921.83	11red	279.57	---	---	---	20.287	---	---	---	1019.44	69.383	20.287	---	---	21.489	---	---	---	111.92	---	---	---	25.958	---	---	---
2020-09-02	08:47:52	1922.83	11red	279.6	---	---	---	20.285	---	---	---	1019.43	69.347	20.285	---	---	21.488	---	---	---	111.925	---	---	---	25.768	---	---	---
2020-09-02	08:47:53	1923.83	11red	279.86	---	---	---	20.285	---	---	---	1019.43	69.294	20.285	---	---	21.478	---	---	---	111.941	---	---	---	25.264	---	---	---
2020-09-02	08:47:54	1924.83	11red	280.04	---	---	---	20.288	---	---	---	1019.44	69.248	20.288	---	---	21.47	---	---	---	111.97	---	---	---	24.789	---	---	---
2020-09-02	08:47:55	1925.83	11red	280	---	---	---	20.293	---	---	---	1019.43	69.231	20.293	---	---	21.469	---	---	---	111.96	---	---	---	24.869	---	---	---
2020-09-02	08:47:56	1926.83	11red	279.87	---	---	---	20.297	---	---	---	1019.42	69.248	20.297	---	---	21.473	---	---	---	111.98	---	---	---	25.223	---	---	---
2020-09-02	08:47:57	1927.83	11red	279.82	---	---	---	20.299	---	---	---	1019.41	69.294	20.299	---	---	21.475	---	---	---	111.956	---	---	---	25.276	---	---	---
2020-09-02	08:47:58	1928.83	11red	279.83	---	---	---	20.296	---	---	---	1019.44	69.329	20.296	---	---	21.475	---	---	---	111.974	---	---	---	25.56	---	---	---
2020-09-02	08:47:59	1929.83	11red	279.92	---	---	---	20.293	---	---	---	1019.44	69.357	20.293	---	---	21.473	---	---	---	111.965	---	---	---	25.098	---	---	---
2020-09-02	08:48:34	1965.52	11white	282.03	---	---	---	20.272	---	---	---	1019.48	69.411	20.272	---	---	21.397	---	---	---	111.48	---	---	---	21.114	---	---	---
2020-09-02	08:48:35	1966.52	11white	284.36	---	---	---	20.258	---	---	---	1019.49	69.457	20.258	---	---	21.31	---	---	---	110.989	---	---	---	16.724	---	---	---
2020-09-02	08:48:36	1967.52	11white	286.35	---	---	---	20.251	---	---	---	1019.47	69.482	20.251	---	---	21.234	---	---	---	110.494	---	---	---	13.41	---	---	---
2020-09-02	08:48:37	1968.52	11white	286.31	---	---	---	20.266	---	---	---	1019.43	69.464	20.266	---	---	21.23	---	---	---	110.504	---	---	---	13.344	---	---	---
2020-09-02	08:48:38	1969.52	11white	286.19	---	---	---	20.277	---	---	---	1019.42	69.454	20.277	---	---	21.231	---	---	---	110.507	---	---	---	13.405	---	---	---
2020-09-02	08:48:39	1970.52	11white	286.18	---	---	---	20.28	---	---	---	1019.44	69.454	20.28	---	---	21.231	---	---	---	110.526	---	---	---	13.372	---	---	---
2020-09-02	08:48:40	1971.52	11white	286.22	---	---	---	20.278	---	---	---	1019.46	69.446	20.278	---	---	21.23	---	---	---	110.53	---	---	---	13.37	---	---	---
2020-09-02	08:48:41	1972.52	11white	286.08	---	---	---	20.274	---	---	---	1019.47	69.429	20.274	---	---	21.237	---	---	---	110.546	---	---	---	13.384	---	---	---
2020-09-02	08:48:42	1973.52	11white	286.16	---	---	---	20.271	---	---	---	1019.44	69.411	20.271	---	---	21.235	---	---	---	110.569	---	---	---	13.089	---	---	---
2020-09-02	08:48:43	1974.52	11white	285.98	---	---	---	20.269	---	---	---	1019.42	69.383	20.269	---	---	21.242	---	---	---	110.626	---	---	---	12.515	---	---	---
2020-09-02	08:48:44	1975.52	11white	285.98	---	---	---	20.266	---	---	---	1019.42	69.358	20.266	---	---	21.243	---	---	---	110.668	---	---	---	12.077	---	---	---
2020-09-02	08:48:45	1976.52	11white	286	---	---	---	20.265	---	---	---	1019.46	69.35	20.265	---	---	21.243	---	---	---	110.657	---	---	---	11.865	---	---	---
2020-09-02	08:48:46	1977.52	11white	286.26	---	---	---	20.262	---	---	---	1019.49	69.396	20.262	---	---	21.234	---	---	---	110.643	---	---	---	11.949	---	---	---
2020-09-02	08:48:47	1978.52	11white	286.36	---	---	---	20.263	---	---	---	1019.47	69.475	20.263	---	---	21.23	---	---	---	110.64	---	---	---	11.879	---	---	---
2020-09-02	08:48:48	1979.52	11white	286.16	---	---	---	20.267	---	---	---	1019.47	69.536	20.267	---	---	21.236	---	---	---	110.667	---	---	---	11.937	---	---	---
2020-09-02	08:48:49	1980.52	11white	285.94	---	---	---	20.27	---	---	---	1019.45	69.543	20.27	---	---	21.243	---	---	---	110.668	---	---	---	11.978	---	---	---
2020-09-02	08:48:50	1981.52	11white	286.11	---	---	---	20.271	---	---	---	1019.47	69.518	20.271	---	---	21.237	---	---	---	110.668	---	---	---	12.043	---	---	---
2020-09-02	08:48:51	1982.52	11white	286.1	---	---	---	20.265	---	---	---	1019.44	69.482	20.265	---	---	21.239	---	---	---	110.668	---	---	---	12.097	---	---	---
2020-09-02	08:48:52	1983.52	11white	286.38	---	---	---	20.258	---	---	---	1019.46	69.447	20.258	---	---	21.231	---	---	---	110.658	---	---	---	12.098	---	---	---
2020-09-02	08:48:53	1984.52	11white	286.12	---	---	---	20.255	---	---	---	1019.44	69.419	20.255	---	---	21.242	---	---	---	110.673	---	---	---	12.112	---	---	---
2020-09-02	08:51:36	2146.97	11blue	286.32	---	---	---	20.246	---	---	---	1019.47	69.508	20.246	---	---	21.237	---	---	---	110.761	---	---	---	14.636	---	---	---
2020-09-02	08:51:37	2147.97	11blue	286.16	---	---	---	20.241	---	---	---	1019.43	69.597	20.241	---	---	21.245	---	---	---	110.852	---	---	---	17.162	---	---	---
2020-09-02	08:51:38	2148.97	11blue	286.18	---	---	---	20.234	---	---	---	1019.46	69.686	20.234	---	---	21.247	---	---	---	110.944	---	---	---	19.703	---	---	---
2020-09-02	08:51:39	2149.97	11blue	286.15	---	---	---	20.236	---	---	---	1019.43	69.686	20.236	---	---	21.247	---	---	---	110.941	---	---	---	19.677	---	---	---
2020-09-02	08:51:40	2150.97	11blue	286	---	---	---	20.243	---	---	---	1019.44	69.714	20.243	---	---	21.251	---	---	---	110.972	---	---	---	19.683	---	---	---
2020-09-02	08:51:41	2151.97	11blue	285.98	---	---	---	20.252	---	---	---	1019.43	69.731	20.252	---	---	21.248	---	---	---	110.95	---	---	---	19.628	---	---	---
2020-09-02	08:51:42	2152.97	11blue	285.83	---	---	---	20.264	---	---	---	1019.47	69.731	20.264	---	---	21.25	---	---	---	110.942	---	---	---	19.612	---	---	---
2020-09-02	08:51:43	2153.97	11blue	285.8	---	---	---	20.269	---	---	---	1019.48	69.721	20.269	---	---	21.25	---	---	---	110.933	---	---	---	19.607	---	---	---
2020-09-02	08:51:44	2154.97	11blue	285.6	---	---	---	20.267	---	---	---	1019.49	69.713	20.267	---	---	21.258	---	---	---	110.953	---	---	---	19.669	---	---	---
2020-09-02	08:51:45	2155.97	11blue	285.56	---	---	---	20.263	---	---	---	1019.47	69.696	20.263	---	---	21.261	---	---	---	110.965	---	---	---	19.709	---	---	---
2020-09-02	08:51:46	2156.97	11blue	285.59	---	---	---	20.256	---	---	---	1019.44	69.678	20.256	---	---	21.262	---	---	---	110.948	---	---	---	19.706	---	---	---
2020-09-02	08:51:47	2157.97	11blue	285.84	---	---	---	20.248	---	---	---	1019.42	69.668	20.248	---	---	21.255	---	---	---	110.943	---	---	---	19.674	---	---	---
2020-09-02	08:51:48	2158.97	11blue	285.93	---	---	---	20.24	---	---	---	1019.39	69.668	20.24	---	---	21.254	---	---	---	110.952	---	---	---	19.682	---	---	---
2020-09-02	08:51:49	2159.97	11blue	286.08	---	---	---	20.233	---	---	---	1019.42	69.658	20.233	---	---	21.251	---	---	---	110.977	---	---	---	19.662	---	---	---
2020-09-02	08:51:50	2160.97	11blue	286.15	---	---	---	20.228	---	---	---	1019.45	69.622	20.228	---	---	21.25	---	---	---	110.977	---	---	---	19.659	---	---	---
2020-09-02	08:51:51	2161.97	11blue	286.14	---	---	---	20.227	---	---	---	1019.49	69.569	20.227	---	---	21.25	---	---	---	110.962	---	---	---	19.619	---	---	---
2020-09-02	08:51:52	2162.97	11blue	286.08	---	---	---	20.233	---	---	---	1019.48	69.508	20.233	---	---	21.251	---	---	---	110.95	---	---	---	19.609	---	---	---
2020-09-02	08:51:53	2163.97	11blue	286.01	---	---	---	20.243	---	---	---	1019.47	69.472	20.243	---	---	21.25	---	---	---	110.953	---	---	---	19.576	---	---	---
2020-09-02	08:51:54	2164.97	11blue	285.96	---	---	---	20.255	---	---	---	1019.48	69.462	20.255	---	---	21.248	---	---	---	110.967	---	---	---	19.6	---	---	---
2020-09-02	08:51:55	2165.97	11blue	285.83	---	---	---	20.264	---	---	---	1019.48	69.48	20.264	---	---	21.25	---	---	---	110.971	---	---	---	19.622	---	---	---
2020-09-02	08:51:56	2166.97	11blue	285.72	---	---	---	20.269	---	---	---	1019.45	69.523	20.269	---	---	21.253	---	---	---	110.977	---	---	---	19.654	---	---	---
2020-09-02	08:52:29	2199.89	11orange	285.36	---	---	---	20.274	---	---	---	1019.44	69.569	20.274	---	---	21.265	---	---	---	111.072	---	---	---	19.953	---	---	---
2020-09-02	08:52:30	2200.89	11orange	284.9	---	---	---	20.282	---	---	---	1019.47	69.604	20.282	---	---	21.28	---	---	---	111.205	---	---	---	20.311	---	---	---
2020-09-02	08:52:31	2201.89	11orange	284.1	---	---	---	20.29	---	---	---	1019.48	69.614	20.29	---	---	21.309	---	---	---	111.359	---	---	---	20.645	---	---	---
2020-09-02	08:52:32	2202.89	11orange	283.63	---	---	---	20.298	---	---	---	1019.47	69.632	20.298	---	---	21.324	---	---	---	111.444	---	---	---	20.689	---	---	---
2020-09-02	08:52:33	2203.89	11orange	283.46	---	---	---	20.305	---	---	---	1019.46	69.658	20.305	---	---	21.329	---	---	---	111.512	---	---	---	20.663	---	---	---
2020-09-02	08:52:34	2204.89	11orange	283.58	---	---	---	20.309	---	---	---	1019.49	69.711	20.309	---	---	21.323	---	---	---	111.576	---	---	---	20.668	---	---	---
2020-09-02	08:52:35	2205.89	11orange	283.16	---	---	---	20.31	---	---	---	1019.49	69.765	20.31	---	---	21.339	---	---	---	111.634	---	---	---	20.65	---	---	---
2020-09-02	08:52:36	2206.89	11orange	283.17	---	---	---	20.309	---	---	---	1019.49	69.803	20.309	---	---	21.339	---	---	---	111.628	---	---	---	20.683	---	---	---
2020-09-02	08:52:37	2207.89	11orange	283.16	---	---	---	20.311	---	---	---	1019.47	69.803	20.311	---	---	21.339	---	---	---	111.592	---	---	---	20.695	---	---	---
2020-09-02	08:52:38	2208.89	11orange	283.71	---	---	---	20.311	---	---	---	1019.48	69.785	20.311	---	---	21.317	---	---	---	111.521	---	---	---	20.703	---	---	---
2020-09-02	08:52:39	2209.89	11orange	283.78	---	---	---	20.312	---	---	---	1019.47	69.765	20.312	---	---	21.314	---	---	---	111.482	---	---	---	20.695	---	---	---
2020-09-02	08:52:40	2210.89	11orange	283.94	---	---	---	20.314	---	---	---	1019.44	69.747	20.314	---	---	21.307	---	---	---	111.442	---	---	---	20.695	---	---	---
2020-09-02	08:52:41	2211.89	11orange	284.09	---	---	---	20.315	---	---	---	1019.43	69.729	20.315	---	---	21.301	---	---	---	111.402	---	---	---	20.716	---	---	---
2020-09-02	08:52:42	2212.89	11orange	284.53	---	---	---	20.31	---	---	---	1019.45	69.729	20.31	---	---	21.285	---	---	---	111.347	---	---	---	20.727	---	---	---
2020-09-02	08:52:43	2213.89	11orange	284.77	---	---	---	20.307	---	---	---	1019.48	69.747	20.307	---	---	21.277	---	---	---	111.297	---	---	---	20.741	---	---	---
2020-09-02	08:52:44	2214.89	11orange	285.1	---	---	---	20.304	---	---	---	1019.52	69.775	20.304	---	---	21.265	---	---	---	111.255	---	---	---	20.752	---	---	---
2020-09-02	08:52:45	2215.89	11orange	284.94	---	---	---	20.307	---	---	---	1019.51	69.795	20.307	---	---	21.27	---	---	---	111.254	---	---	---	20.767	---	---	---
2020-09-02	08:52:46	2216.89	11orange	285.12	---	---	---	20.308	---	---	---	1019.51	69.795	20.308	---	---	21.263	---	---	---	111.239	---	---	---	20.764	---	---	---
2020-09-02	08:52:47	2217.89	11orange	285.37	---	---	---	20.309	---	---	---	1019.5	69.775	20.309	---	---	21.253	---	---	---	111.23	---	---	---	20.767	---	---	---
2020-09-02	08:52:48	2218.89	11orange	285.26	---	---	---	20.311	---	---	---	1019.5	69.754	20.311	---	---	21.256	---	---	---	111.22	---	---	---	20.768	---	---	---
2020-09-02	08:52:49	2219.89	11orange	285.04	---	---	---	20.311	---	---	---	1019.5	69.744	20.311	---	---	21.265	---	---	---	111.228	---	---	---	20.769	---	---	---
2020-09-02	08:52:50	2220.89	11orange	284.59	---	---	---	20.31	---	---	---	1019.48	69.736	20.31	---	---	21.283	---	---	---	111.235	---	---	---	20.762	---	---	---
2020-09-02	08:52:51	2221.89	11orange	284.6	---	---	---	20.31	---	---	---	1019.48	69.711	20.31	---	---	21.282	---	---	---	111.23	---	---	---	20.76	---	---	---
2020-09-02	08:52:52	2222.89	11orange	284.67	---	---	---	20.31	---	---	---	1019.44	69.675	20.31	---	---	21.28	---	---	---	111.24	---	---	---	20.761	---	---	---
2020-09-02	08:52:53	2223.89	11orange	284.87	---	---	---	20.309	---	---	---	1019.44	69.658	20.309	---	---	21.272	---	---	---	111.232	---	---	---	20.772	---	---	---
2020-09-02	08:52:54	2224.89	11orange	285.13	---	---	---	20.306	---	---	---	1019.44	69.665	20.306	---	---	21.263	---	---	---	111.234	---	---	---	20.764	---	---	---
2020-09-02	08:52:55	2225.89	11orange	285.09	---	---	---	20.304	---	---	---	1019.45	69.676	20.304	---	---	21.265	---	---	---	111.23	---	---	---	20.767	---	---	---
2020-09-02	08:52:56	2226.89	11orange	285.03	---	---	---	20.301	---	---	---	1019.43	69.701	20.301	---	---	21.269	---	---	---	111.25	---	---	---	20.762	---	---	---
2020-09-02	08:52:57	2227.89	11orange	285.09	---	---	---	20.293	---	---	---	1019.42	69.729	20.293	---	---	21.269	---	---	---	111.244	---	---	---	20.773	---	---	---
2020-09-02	08:52:58	2228.89	11orange	285.41	---	---	---	20.284	---	---	---	1019.42	69.765	20.284	---	---	21.26	---	---	---	111.244	---	---	---	20.779	---	---	---
2020-09-02	08:52:59	2229.89	11orange	285.66	---	---	---	20.276	---	---	---	1019.43	69.765	20.276	---	---	21.253	---	---	---	111.233	---	---	---	20.785	---	---	---
2020-09-02	08:53:00	2230.89	11orange	285.81	---	---	---	20.272	---	---	---	1019.43	69.765	20.272	---	---	21.248	---	---	---	111.241	---	---	---	20.799	---	---	---
2020-09-02	08:53:01	2231.89	11orange	285.63	---	---	---	20.271	---	---	---	1019.43	69.793	20.271	---	---	21.256	---	---	---	111.236	---	---	---	20.794	---	---	---
2020-09-02	08:53:02	2232.89	11orange	285.65	---	---	---	20.27	---	---	---	1019.45	69.866	20.27	---	---	21.255	---	---	---	111.24	---	---	---	20.784	---	---	---
2020-09-02	08:53:03	2233.89	11orange	285.25	---	---	---	20.27	---	---	---	1019.43	69.937	20.27	---	---	21.271	---	---	---	111.258	---	---	---	20.79	---	---	---
2020-09-02	08:53:04	2234.89	11orange	285.31	---	---	---	20.269	---	---	---	1019.41	69.973	20.269	---	---	21.269	---	---	---	111.311	---	---	---	20.802	---	---	---
2020-09-02	08:53:40	2271.25	11green	284.02	---	---	---	20.258	---	---	---	1019.4	70.143	20.258	---	---	21.323	---	---	---	111.604	---	---	---	20.962	---	---	---
2020-09-02	08:53:41	2272.25	11green	283.03	---	---	---	20.244	---	---	---	1019.43	70.306	20.244	---	---	21.367	---	---	---	111.881	---	---	---	21.119	---	---	---
2020-09-02	08:53:42	2273.25	11green	281.98	---	---	---	20.229	---	---	---	1019.47	70.477	20.229	---	---	21.413	---	---	---	112.138	---	---	---	21.297	---	---	---
2020-09-02	08:53:43	2274.25	11green	282.01	---	---	---	20.226	---	---	---	1019.43	70.484	20.226	---	---	21.413	---	---	---	112.15	---	---	---	21.328	---	---	---
2020-09-02	08:53:44	2275.25	11green	282.24	---	---	---	20.221	---	---	---	1019.43	70.492	20.221	---	---	21.406	---	---	---	112.171	---	---	---	21.347	---	---	---
2020-09-02	08:53:45	2276.25	11green	282.32	---	---	---	20.216	---	---	---	1019.43	70.492	20.216	---	---	21.404	---	---	---	112.172	---	---	---	21.358	---	---	---
2020-09-02	08:53:46	2277.25	11green	282.44	---	---	---	20.209	---	---	---	1019.48	70.474	20.209	---	---	21.402	---	---	---	112.186	---	---	---	21.36	---	---	---
2020-09-02	08:53:47	2278.25	11green	282.36	---	---	---	20.212	---	---	---	1019.47	70.449	20.212	---	---	21.404	---	---	---	112.183	---	---	---	21.352	---	---	---
2020-09-02	08:53:48	2279.25	11green	282.27	---	---	---	20.224	---	---	---	1019.45	70.413	20.224	---	---	21.404	---	---	---	112.193	---	---	---	21.342	---	---	---
2020-09-02	08:53:49	2280.25	11green	282.2	---	---	---	20.243	---	---	---	1019.47	70.37	20.243	---	---	21.4	---	---	---	112.207	---	---	---	21.326	---	---	---
2020-09-02	08:53:50	2281.25	11green	282.09	---	---	---	20.262	---	---	---	1019.49	70.324	20.262	---	---	21.398	---	---	---	112.207	---	---	---	21.307	---	---	---
2020-09-02	08:53:51	2282.25	11green	282.07	---	---	---	20.273	---	---	---	1019.49	70.296	20.273	---	---	21.395	---	---	---	112.22	---	---	---	21.291	---	---	---
2020-09-02	08:53:52	2283.25	11green	282.03	---	---	---	20.281	---	---	---	1019.51	70.286	20.281	---	---	21.393	---	---	---	112.216	---	---	---	21.276	---	---	---
2020-09-02	08:53:53	2284.25	11green	282.09	---	---	---	20.278	---	---	---	1019.51	70.286	20.278	---	---	21.392	---	---	---	112.252	---	---	---	20.834	---	---	---
2020-09-02	08:53:54	2285.25	11green	281.88	---	---	---	20.273	---	---	---	1019.55	70.314	20.273	---	---	21.402	---	---	---	112.22	---	---	---	19.656	---	---	---
2020-09-02	08:53:55	2286.25	11green	281.68	---	---	---	20.268	---	---	---	1019.55	70.367	20.268	---	---	21.412	---	---	---	112.213	---	---	---	18.848	---	---	---
2020-09-02	08:53:56	2287.25	11green	281.56	---	---	---	20.265	---	---	---	1019.55	70.431	20.265	---	---	21.417	---	---	---	112.209	---	---	---	18.877	---	---	---
2020-09-02	08:53:57	2288.25	11green	281.7	---	---	---	20.263	---	---	---	1019.53	70.467	20.263	---	---	21.413	---	---	---	112.255	---	---	---	19.649	---	---	---
2020-09-02	08:53:58	2289.25	11green	281.71	---	---	---	20.256	---	---	---	1019.5	70.495	20.256	---	---	21.415	---	---	---	112.279	---	---	---	20.051	---	---	---
2020-09-02	08:53:59	2290.25	11green	281.81	---	---	---	20.25	---	---	---	1019.5	70.53	20.25	---	---	21.413	---	---	---	112.283	---	---	---	20.06	---	---	---
2020-09-02	08:54:00	2291.25	11green	281.86	---	---	---	20.248	---	---	---	1019.51	70.601	20.248	---	---	21.411	---	---	---	112.269	---	---	---	19.901	---	---	---
2020-09-02	09:19:05	3796.13	10blue	284.23	---	---	---	20.207	---	---	---	1019.55	71.504	20.207	---	---	21.333	---	---	---	112.353	---	---	---	18.887	---	---	---
2020-09-02	09:19:06	3797.13	10blue	286.46	---	---	---	20.166	---	---	---	1019.54	72.379	20.166	---	---	21.26	---	---	---	112.442	---	---	---	17.832	---	---	---
2020-09-02	09:19:07	3798.13	10blue	288.53	---	---	---	20.123	---	---	---	1019.53	73.218	20.123	---	---	21.194	---	---	---	112.532	---	---	---	16.924	---	---	---
2020-09-02	09:19:08	3799.13	10blue	288.43	---	---	---	20.122	---	---	---	1019.53	73.19	20.122	---	---	21.198	---	---	---	112.528	---	---	---	16.915	---	---	---
2020-09-02	09:19:09	3800.13	10blue	288.23	---	---	---	20.119	---	---	---	1019.58	73.154	20.119	---	---	21.207	---	---	---	112.511	---	---	---	16.925	---	---	---
2020-09-02	09:19:10	3801.13	10blue	288.39	---	---	---	20.115	---	---	---	1019.56	73.093	20.115	---	---	21.202	---	---	---	112.513	---	---	---	16.954	---	---	---
2020-09-02	09:19:11	3802.13	10blue	288.29	---	---	---	20.111	---	---	---	1019.54	73.022	20.111	---	---	21.207	---	---	---	112.514	---	---	---	16.944	---	---	---
2020-09-02	09:19:12	3803.13	10blue	288.67	---	---	---	20.107	---	---	---	1019.5	72.951	20.107	---	---	21.194	---	---	---	112.523	---	---	---	16.921	---	---	---
2020-09-02	09:19:13	3804.13	10blue	288.63	---	---	---	20.103	---	---	---	1019.5	72.905	20.103	---	---	21.197	---	---	---	112.524	---	---	---	16.914	---	---	---
2020-09-02	09:19:14	3805.13	10blue	288.75	---	---	---	20.099	---	---	---	1019.49	72.877	20.099	---	---	21.194	---	---	---	112.52	---	---	---	16.88	---	---	---
2020-09-02	09:19:15	3806.13	10blue	288.39	---	---	---	20.099	---	---	---	1019.51	72.859	20.099	---	---	21.207	---	---	---	112.527	---	---	---	16.887	---	---	---
2020-09-02	09:19:16	3807.13	10blue	288.21	---	---	---	20.1	---	---	---	1019.52	72.832	20.1	---	---	21.214	---	---	---	112.515	---	---	---	16.891	---	---	---
2020-09-02	09:19:17	3808.13	10blue	288.23	---	---	---	20.101	---	---	---	1019.52	72.796	20.101	---	---	21.213	---	---	---	112.5	---	---	---	16.893	---	---	---
2020-09-02	09:19:18	3809.13	10blue	288.39	---	---	---	20.103	---	---	---	1019.49	72.75	20.103	---	---	21.206	---	---	---	112.473	---	---	---	16.928	---	---	---
2020-09-02	09:19:19	3810.13	10blue	288.79	---	---	---	20.106	---	---	---	1019.5	72.697	20.106	---	---	21.19	---	---	---	112.485	---	---	---	16.919	---	---	---
2020-09-02	09:19:20	3811.13	10blue	289.04	---	---	---	20.108	---	---	---	1019.46	72.661	20.108	---	---	21.18	---	---	---	112.503	---	---	---	16.932	---	---	---
2020-09-02	09:19:21	3812.13	10blue	289.14	---	---	---	20.109	---	---	---	1019.51	72.679	20.109	---	---	21.175	---	---	---	112.51	---	---	---	16.901	---	---	---
2020-09-02	09:19:22	3813.13	10blue	288.92	---	---	---	20.111	---	---	---	1019.54	72.76	20.111	---	---	21.183	---	---	---	112.496	---	---	---	16.858	---	---	---
2020-09-02	09:19:23	3814.13	10blue	288.61	---	---	---	20.117	---	---	---	1019.6	72.859	20.117	---	---	21.193	---	---	---	112.477	---	---	---	16.811	---	---	---
2020-09-02	09:19:24	3815.13	10blue	288.57	---	---	---	20.122	---	---	---	1019.58	72.923	20.122	---	---	21.193	---	---	---	112.482	---	---	---	16.794	---	---	---
2020-09-02	09:19:25	3816.13	10blue	288.49	---	---	---	20.125	---	---	---	1019.56	72.951	20.125	---	---	21.195	---	---	---	112.475	---	---	---	16.77	---	---	---
2020-09-02	09:19:55	3846.53	10yellow	287.93	---	---	---	20.066	---	---	---	1019.53	72.826	20.066	---	---	21.237	---	---	---	112.763	---	---	---	18.335	---	---	---
2020-09-02	09:19:56	3847.53	10yellow	287.47	---	---	---	20.009	---	---	---	1019.51	72.702	20.009	---	---	21.274	---	---	---	112.963	---	---	---	30.581	---	---	---
2020-09-02	09:19:57	3848.53	10yellow	287.14	---	---	---	19.95	---	---	---	1019.49	72.559	19.95	---	---	21.307	---	---	---	113.212	---	---	---	43.51	---	---	---
2020-09-02	09:19:58	3849.53	10yellow	287.14	---	---	---	19.953	---	---	---	1019.49	72.542	19.953	---	---	21.306	---	---	---	113.142	---	---	---	54.923	---	---	---
2020-09-02	09:19:59	3850.53	10yellow	287.19	---	---	---	19.955	---	---	---	1019.5	72.506	19.955	---	---	21.303	---	---	---	113.164	---	---	---	56.195	---	---	---
2020-09-02	09:20:00	3851.53	10yellow	287.22	---	---	---	19.959	---	---	---	1019.54	72.47	19.959	---	---	21.301	---	---	---	113.114	---	---	---	56.464	---	---	---
2020-09-02	09:20:01	3852.53	10yellow	287.27	---	---	---	19.964	---	---	---	1019.53	72.427	19.964	---	---	21.297	---	---	---	113.151	---	---	---	45.076	---	---	---
2020-09-02	09:20:02	3853.53	10yellow	287.27	---	---	---	19.963	---	---	---	1019.56	72.391	19.963	---	---	21.297	---	---	---	113.112	---	---	---	44.645	---	---	---
2020-09-02	09:20:03	3854.53	10yellow	287.41	---	---	---	19.961	---	---	---	1019.52	72.363	19.961	---	---	21.293	---	---	---	113.138	---	---	---	45.099	---	---	---
2020-09-02	09:20:04	3855.53	10yellow	287.59	---	---	---	19.958	---	---	---	1019.52	72.371	19.958	---	---	21.287	---	---	---	113.054	---	---	---	55.243	---	---	---
2020-09-02	09:20:05	3856.53	10yellow	287.57	---	---	---	19.96	---	---	---	1019.51	72.399	19.96	---	---	21.287	---	---	---	113.051	---	---	---	53.823	---	---	---
2020-09-02	09:20:06	3857.53	10yellow	287.49	---	---	---	19.966	---	---	---	1019.5	72.417	19.966	---	---	21.288	---	---	---	113.06	---	---	---	53.127	---	---	---
2020-09-02	09:20:07	3858.53	10yellow	287.42	---	---	---	19.967	---	---	---	1019.53	72.417	19.967	---	---	21.29	---	---	---	113.113	---	---	---	54.639	---	---	---
2020-09-02	09:20:08	3859.53	10yellow	287.26	---	---	---	19.968	---	---	---	1019.53	72.407	19.968	---	---	21.296	---	---	---	113.12	---	---	---	55.354	---	---	---
2020-09-02	09:20:09	3860.53	10yellow	287.12	---	---	---	19.965	---	---	---	1019.55	72.425	19.965	---	---	21.302	---	---	---	113.105	---	---	---	55.203	---	---	---
2020-09-02	09:20:10	3861.53	10yellow	287.39	---	---	---	19.963	---	---	---	1019.54	72.435	19.963	---	---	21.292	---	---	---	113.064	---	---	---	54.622	---	---	---
2020-09-02	09:20:11	3862.53	10yellow	287.58	---	---	---	19.963	---	---	---	1019.5	72.435	19.963	---	---	21.285	---	---	---	113.054	---	---	---	55.14	---	---	---
2020-09-02	09:20:12	3863.53	10yellow	287.66	---	---	---	19.965	---	---	---	1019.47	72.399	19.965	---	---	21.281	---	---	---	113	---	---	---	53.843	---	---	---
2020-09-02	09:20:13	3864.53	10yellow	287.52	---	---	---	19.969	---	---	---	1019.46	72.353	19.969	---	---	21.286	---	---	---	112.987	---	---	---	53.926	---	---	---
2020-09-02	09:20:14	3865.53	10yellow	287.43	---	---	---	19.971	---	---	---	1019.5	72.307	19.971	---	---	21.288	---	---	---	112.973	---	---	---	52.292	---	---	---
2020-09-02	09:20:15	3866.53	10yellow	287.28	---	---	---	19.974	---	---	---	1019.53	72.272	19.974	---	---	21.293	---	---	---	113.034	---	---	---	55.622	---	---	---
2020-09-02	09:20:16	3867.53	10yellow	287.23	---	---	---	19.973	---	---	---	1019.51	72.244	19.973	---	---	21.295	---	---	---	113.044	---	---	---	55.068	---	---	---
2020-09-02	09:20:57	3908.59	10white	290.04	---	---	---	19.972	---	---	---	1019.52	72.122	19.972	---	---	21.189	---	---	---	112.334	---	---	---	50.962	---	---	---
2020-09-02	09:20:58	3909.59	10white	292.88	---	---	---	19.97	---	---	---	1019.5	71.997	19.97	---	---	21.081	---	---	---	111.602	---	---	---	43.35	---	---	---
2020-09-02	09:20:59	3910.59	10white	295.67	---	---	---	19.974	---	---	---	1019.5	71.883	19.974	---	---	20.974	---	---	---	110.925	---	---	---	38.599	---	---	---
2020-09-02	09:21:00	3911.59	10white	295.66	---	---	---	19.98	---	---	---	1019.47	71.873	19.98	---	---	20.972	---	---	---	110.947	---	---	---	38.757	---	---	---
2020-09-02	09:21:01	3912.59	10white	295.63	---	---	---	19.989	---	---	---	1019.52	71.873	19.989	---	---	20.97	---	---	---	110.965	---	---	---	39.067	---	---	---
2020-09-02	09:21:02	3913.59	10white	295.58	---	---	---	19.996	---	---	---	1019.53	71.873	19.996	---	---	20.97	---	---	---	110.946	---	---	---	39.047	---	---	---
2020-09-02	09:21:03	3914.59	10white	295.44	---	---	---	20	---	---	---	1019.57	71.873	20	---	---	20.974	---	---	---	110.964	---	---	---	39.167	---	---	---
2020-09-02	09:21:04	3915.59	10white	295.3	---	---	---	20.002	---	---	---	1019.56	71.873	20.002	---	---	20.978	---	---	---	110.961	---	---	---	38.91	---	---	---
2020-09-02	09:21:05	3916.59	10white	295.2	---	---	---	20.002	---	---	---	1019.59	71.865	20.002	---	---	20.982	---	---	---	111.001	---	---	---	38.91	---	---	---
2020-09-02	09:21:06	3917.59	10white	295.17	---	---	---	20.001	---	---	---	1019.56	71.868	20.001	---	---	20.983	---	---	---	111.017	---	---	---	38.954	---	---	---
2020-09-02	09:21:07	3918.59	10white	295.29	---	---	---	20	---	---	---	1019.57	71.87	20	---	---	20.98	---	---	---	111.044	---	---	---	39.186	---	---	---
2020-09-02	09:21:08	3919.59	10white	295.25	---	---	---	19.997	---	---	---	1019.55	71.88	19.997	---	---	20.982	---	---	---	111.044	---	---	---	39.268	---	---	---
2020-09-02	09:21:09	3920.59	10white	295.2	---	---	---	19.999	---	---	---	1019.53	71.888	19.999	---	---	20.983	---	---	---	111.038	---	---	---	39.221	---	---	---
2020-09-02	09:21:10	3921.59	10white	294.93	---	---	---	20.001	---	---	---	1019.52	71.895	20.001	---	---	20.992	---	---	---	111.046	---	---	---	39.179	---	---	---
2020-09-02	09:21:11	3922.59	10white	294.92	---	---	---	20.001	---	---	---	1019.52	71.895	20.001	---	---	20.993	---	---	---	111.071	---	---	---	39.268	---	---	---
2020-09-02	09:21:12	3923.59	10white	294.86	---	---	---	20.001	---	---	---	1019.54	71.888	20.001	---	---	20.995	---	---	---	111.1	---	---	---	39.423	---	---	---
2020-09-02	09:21:13	3924.59	10white	295.01	---	---	---	19.999	---	---	---	1019.52	71.888	19.999	---	---	20.99	---	---	---	111.094	---	---	---	39.52	---	---	---
2020-09-02	09:21:14	3925.59	10white	294.8	---	---	---	20.003	---	---	---	1019.52	71.888	20.003	---	---	20.997	---	---	---	111.101	---	---	---	39.544	---	---	---
2020-09-02	09:21:15	3926.59	10white	294.82	---	---	---	20.005	---	---	---	1019.55	71.888	20.005	---	---	20.995	---	---	---	111.114	---	---	---	39.541	---	---	---
2020-09-02	09:21:16	3927.59	10white	294.63	---	---	---	20.008	---	---	---	1019.58	71.888	20.008	---	---	21.001	---	---	---	111.127	---	---	---	39.535	---	---	---
2020-09-02	09:21:17	3928.59	10white	294.85	---	---	---	20.008	---	---	---	1019.6	71.906	20.008	---	---	20.993	---	---	---	111.127	---	---	---	39.553	---	---	---
2020-09-02	09:21:18	3929.59	10white	294.83	---	---	---	20.009	---	---	---	1019.59	71.924	20.009	---	---	20.994	---	---	---	111.119	---	---	---	39.576	---	---	---
2020-09-02	09:21:19	3930.59	10white	294.89	---	---	---	20.006	---	---	---	1019.56	71.924	20.006	---	---	20.992	---	---	---	111.133	---	---	---	39.638	---	---	---
2020-09-02	09:21:20	3931.59	10white	294.95	---	---	---	20.004	---	---	---	1019.56	71.906	20.004	---	---	20.991	---	---	---	111.118	---	---	---	39.624	---	---	---
2020-09-02	09:21:21	3932.59	10white	295.05	---	---	---	20.003	---	---	---	1019.55	71.878	20.003	---	---	20.987	---	---	---	111.103	---	---	---	39.574	---	---	---
2020-09-02	09:21:22	3933.59	10white	295.11	---	---	---	20.004	---	---	---	1019.55	71.852	20.004	---	---	20.985	---	---	---	111.073	---	---	---	39.545	---	---	---
2020-09-02	09:21:23	3934.59	10white	294.88	---	---	---	20.006	---	---	---	1019.5	71.842	20.006	---	---	20.993	---	---	---	111.086	---	---	---	39.515	---	---	---
2020-09-02	09:21:24	3935.59	10white	294.66	---	---	---	20.009	---	---	---	1019.49	71.835	20.009	---	---	21	---	---	---	111.097	---	---	---	39.56	---	---	---
2020-09-02	09:23:52	4083.2	10green	291.62	---	---	---	20.075	---	---	---	1019.54	71.316	20.075	---	---	21.094	---	---	---	111.274	---	---	---	37.011	---	---	---
2020-09-02	09:23:53	4084.2	10green	288.73	---	---	---	20.14	---	---	---	1019.55	70.782	20.14	---	---	21.182	---	---	---	111.437	---	---	---	34.455	---	---	---
2020-09-02	09:23:54	4085.2	10green	285.88	---	---	---	20.206	---	---	---	1019.54	70.245	20.206	---	---	21.268	---	---	---	111.604	---	---	---	31.842	---	---	---
2020-09-02	09:23:55	4086.2	10green	285.96	---	---	---	20.208	---	---	---	1019.51	70.22	20.208	---	---	21.264	---	---	---	111.607	---	---	---	31.814	---	---	---
2020-09-02	09:23:56	4087.2	10green	285.7	---	---	---	20.211	---	---	---	1019.53	70.192	20.211	---	---	21.274	---	---	---	111.647	---	---	---	29.507	---	---	---
2020-09-02	09:23:57	4088.2	10green	285.66	---	---	---	20.207	---	---	---	1019.55	70.156	20.207	---	---	21.276	---	---	---	111.716	---	---	---	26.528	---	---	---
2020-09-02	09:23:58	4089.2	10green	285.57	---	---	---	20.204	---	---	---	1019.53	70.12	20.204	---	---	21.281	---	---	---	111.716	---	---	---	26.58	---	---	---
2020-09-02	09:23:59	4090.2	10green	285.8	---	---	---	20.198	---	---	---	1019.53	70.085	20.198	---	---	21.274	---	---	---	111.684	---	---	---	28.901	---	---	---
2020-09-02	09:24:00	4091.2	10green	285.99	---	---	---	20.193	---	---	---	1019.54	70.057	20.193	---	---	21.269	---	---	---	111.614	---	---	---	31.895	---	---	---
2020-09-02	09:24:01	4092.2	10green	286.18	---	---	---	20.188	---	---	---	1019.55	70.029	20.188	---	---	21.263	---	---	---	111.626	---	---	---	31.871	---	---	---
2020-09-02	09:24:02	4093.2	10green	286.31	---	---	---	20.187	---	---	---	1019.56	70.011	20.187	---	---	21.258	---	---	---	111.612	---	---	---	31.847	---	---	---
2020-09-02	09:24:03	4094.2	10green	286.24	---	---	---	20.187	---	---	---	1019.54	69.994	20.187	---	---	21.261	---	---	---	111.626	---	---	---	31.838	---	---	---
2020-09-02	09:24:04	4095.2	10green	286.15	---	---	---	20.19	---	---	---	1019.55	69.983	20.19	---	---	21.263	---	---	---	111.627	---	---	---	31.823	---	---	---
2020-09-02	09:24:05	4096.2	10green	286.3	---	---	---	20.192	---	---	---	1019.54	69.965	20.192	---	---	21.257	---	---	---	111.625	---	---	---	31.816	---	---	---
2020-09-02	09:24:06	4097.2	10green	286.28	---	---	---	20.196	---	---	---	1019.57	69.958	20.196	---	---	21.256	---	---	---	111.612	---	---	---	31.789	---	---	---
2020-09-02	09:24:07	4098.2	10green	286	---	---	---	20.201	---	---	---	1019.58	69.95	20.201	---	---	21.265	---	---	---	111.597	---	---	---	31.769	---	---	---
2020-09-02	09:24:08	4099.2	10green	285.9	---	---	---	20.208	---	---	---	1019.56	69.95	20.208	---	---	21.267	---	---	---	111.588	---	---	---	31.746	---	---	---
2020-09-02	09:24:09	4100.2	10green	285.86	---	---	---	20.212	---	---	---	1019.51	69.958	20.212	---	---	21.267	---	---	---	111.584	---	---	---	31.742	---	---	---
2020-09-02	09:24:10	4101.2	10green	286.05	---	---	---	20.217	---	---	---	1019.47	69.976	20.217	---	---	21.258	---	---	---	111.577	---	---	---	31.728	---	---	---
2020-09-02	09:24:11	4102.2	10green	285.79	---	---	---	20.225	---	---	---	1019.49	70.011	20.225	---	---	21.265	---	---	---	111.584	---	---	---	31.715	---	---	---
2020-09-02	09:24:12	4103.2	10green	285.65	---	---	---	20.236	---	---	---	1019.52	70.039	20.236	---	---	21.267	---	---	---	111.582	---	---	---	31.701	---	---	---
2020-09-02	09:24:13	4104.2	10green	285.41	---	---	---	20.247	---	---	---	1019.53	70.067	20.247	---	---	21.273	---	---	---	111.612	---	---	---	31.702	---	---	---
2020-09-02	09:24:14	4105.2	10green	285.15	---	---	---	20.257	---	---	---	1019.53	70.067	20.257	---	---	21.279	---	---	---	111.661	---	---	---	31.682	---	---	---
2020-09-02	09:24:15	4106.2	10green	284.76	---	---	---	20.266	---	---	---	1019.54	70.067	20.266	---	---	21.291	---	---	---	111.723	---	---	---	31.661	---	---	---
2020-09-02	09:24:16	4107.2	10green	284.31	---	---	---	20.271	---	---	---	1019.57	70.047	20.271	---	---	21.307	---	---	---	111.805	---	---	---	31.64	---	---	---
2020-09-02	09:24:17	4108.2	10green	283.94	---	---	---	20.274	---	---	---	1019.57	70.029	20.274	---	---	21.321	---	---	---	111.89	---	---	---	31.623	---	---	---
2020-09-02	09:24:18	4109.2	10green	283.7	---	---	---	20.274	---	---	---	1019.56	70.011	20.274	---	---	21.33	---	---	---	111.983	---	---	---	31.606	---	---	---
2020-09-02	09:24:19	4110.2	10green	283.42	---	---	---	20.27	---	---	---	1019.54	70.004	20.27	---	---	21.342	---	---	---	112.077	---	---	---	31.558	---	---	---
2020-09-02	09:24:20	4111.2	10green	282.8	---	---	---	20.27	---	---	---	1019.54	69.994	20.27	---	---	21.367	---	---	---	112.235	---	---	---	31.485	---	---	---
2020-09-02	09:24:21	4112.2	10green	282.03	---	---	---	20.27	---	---	---	1019.53	69.983	20.27	---	---	21.397	---	---	---	112.443	---	---	---	31.407	---	---	---
2020-09-02	09:24:22	4113.2	10green	281.22	---	---	---	20.274	---	---	---	1019.55	69.965	20.274	---	---	21.427	---	---	---	112.633	---	---	---	31.375	---	---	---
2020-09-02	09:24:23	4114.2	10green	280.57	---	---	---	20.274	---	---	---	1019.54	69.948	20.274	---	---	21.453	---	---	---	112.799	---	---	---	31.374	---	---	---
2020-09-02	09:24:24	4115.2	10green	279.94	---	---	---	20.278	---	---	---	1019.53	69.922	20.278	---	---	21.476	---	---	---	112.928	---	---	---	31.39	---	---	---
2020-09-02	09:24:25	4116.2	10green	279.53	---	---	---	20.28	---	---	---	1019.51	69.905	20.28	---	---	21.492	---	---	---	113.075	---	---	---	31.383	---	---	---
2020-09-02	09:24:26	4117.2	10green	279.33	---	---	---	20.285	---	---	---	1019.52	69.887	20.285	---	---	21.498	---	---	---	113.174	---	---	---	31.364	---	---	---
2020-09-02	09:24:27	4118.2	10green	279.18	---	---	---	20.286	---	---	---	1019.52	69.876	20.286	---	---	21.504	---	---	---	113.25	---	---	---	31.379	---	---	---
2020-09-02	09:24:28	4119.2	10green	278.92	---	---	---	20.286	---	---	---	1019.52	69.866	20.286	---	---	21.515	---	---	---	113.261	---	---	---	31.345	---	---	---
2020-09-02	09:24:29	4120.2	10green	278.8	---	---	---	20.283	---	---	---	1019.5	69.858	20.283	---	---	21.521	---	---	---	113.26	---	---	---	31.34	---	---	---
2020-09-02	09:24:30	4121.2	10green	278.9	---	---	---	20.28	---	---	---	1019.51	69.841	20.28	---	---	21.518	---	---	---	113.207	---	---	---	31.31	---	---	---
2020-09-02	09:24:31	4122.2	10green	279.16	---	---	---	20.282	---	---	---	1019.51	69.823	20.282	---	---	21.506	---	---	---	113.141	---	---	---	31.354	---	---	---
2020-09-02	09:24:32	4123.2	10green	279.5	---	---	---	20.283	---	---	---	1019.52	69.805	20.283	---	---	21.493	---	---	---	113.045	---	---	---	31.393	---	---	---
2020-09-02	09:24:33	4124.2	10green	279.9	---	---	---	20.283	---	---	---	1019.51	69.787	20.283	---	---	21.477	---	---	---	112.948	---	---	---	31.37	---	---	---
2020-09-02	09:24:34	4125.2	10green	280.35	---	---	---	20.281	---	---	---	1019.51	69.769	20.281	---	---	21.459	---	---	---	112.866	---	---	---	31.332	---	---	---
2020-09-02	09:24:35	4126.2	10green	280.7	---	---	---	20.282	---	---	---	1019.49	69.749	20.282	---	---	21.445	---	---	---	112.76	---	---	---	31.316	---	---	---
2020-09-02	09:24:36	4127.2	10green	281.02	---	---	---	20.288	---	---	---	1019.53	69.739	20.288	---	---	21.43	---	---	---	112.673	---	---	---	31.35	---	---	---
2020-09-02	09:24:37	4128.2	10green	281.32	---	---	---	20.293	---	---	---	1019.51	69.729	20.293	---	---	21.417	---	---	---	112.558	---	---	---	31.371	---	---	---
2020-09-02	09:24:38	4129.2	10green	281.58	---	---	---	20.298	---	---	---	1019.55	69.729	20.298	---	---	21.405	---	---	---	112.45	---	---	---	31.349	---	---	---
2020-09-02	09:24:39	4130.2	10green	281.9	---	---	---	20.301	---	---	---	1019.54	69.729	20.301	---	---	21.391	---	---	---	112.353	---	---	---	31.317	---	---	---
2020-09-02	09:24:40	4131.2	10green	282.07	---	---	---	20.302	---	---	---	1019.51	69.742	20.302	---	---	21.385	---	---	---	112.266	---	---	---	31.288	---	---	---
2020-09-02	09:24:41	4132.2	10green	282.26	---	---	---	20.302	---	---	---	1019.48	69.744	20.302	---	---	21.377	---	---	---	112.204	---	---	---	31.255	---	---	---
2020-09-02	09:24:42	4133.2	10green	282.45	---	---	---	20.304	---	---	---	1019.47	69.746	20.304	---	---	21.369	---	---	---	112.14	---	---	---	31.252	---	---	---
2020-09-02	09:24:43	4134.2	10green	282.71	---	---	---	20.307	---	---	---	1019.5	69.729	20.307	---	---	21.358	---	---	---	112.105	---	---	---	31.255	---	---	---
2020-09-02	09:24:44	4135.2	10green	282.99	---	---	---	20.305	---	---	---	1019.52	69.711	20.305	---	---	21.347	---	---	---	112.069	---	---	---	31.279	---	---	---
2020-09-02	09:24:45	4136.2	10green	283.14	---	---	---	20.302	---	---	---	1019.53	69.693	20.302	---	---	21.343	---	---	---	112.013	---	---	---	31.287	---	---	---
2020-09-02	09:24:46	4137.2	10green	283.43	---	---	---	20.297	---	---	---	1019.55	69.693	20.297	---	---	21.333	---	---	---	111.958	---	---	---	31.288	---	---	---
2020-09-02	09:24:47	4138.2	10green	283.57	---	---	---	20.297	---	---	---	1019.54	69.704	20.297	---	---	21.327	---	---	---	111.901	---	---	---	31.293	---	---	---
2020-09-02	09:24:48	4139.2	10green	283.58	---	---	---	20.297	---	---	---	1019.51	69.714	20.297	---	---	21.327	---	---	---	111.888	---	---	---	31.334	---	---	---
2020-09-02	09:24:49	4140.2	10green	283.67	---	---	---	20.295	---	---	---	1019.49	69.714	20.295	---	---	21.324	---	---	---	111.851	---	---	---	31.388	---	---	---
2020-09-02	09:24:50	4141.2	10green	283.71	---	---	---	20.294	---	---	---	1019.47	69.714	20.294	---	---	21.323	---	---	---	111.824	---	---	---	31.416	---	---	---
2020-09-02	09:24:51	4142.2	10green	283.85	---	---	---	20.294	---	---	---	1019.48	69.714	20.294	---	---	21.317	---	---	---	111.781	---	---	---	31.427	---	---	---
2020-09-02	09:24:52	4143.2	10green	283.82	---	---	---	20.296	---	---	---	1019.48	69.721	20.296	---	---	21.318	---	---	---	111.789	---	---	---	31.413	---	---	---
2020-09-02	09:24:53	4144.2	10green	283.98	---	---	---	20.294	---	---	---	1019.51	69.729	20.294	---	---	21.312	---	---	---	111.79	---	---	---	31.451	---	---	---
2020-09-02	09:24:54	4145.2	10green	284.05	---	---	---	20.294	---	---	---	1019.51	69.736	20.294	---	---	21.31	---	---	---	111.806	---	---	---	31.443	---	---	---
2020-09-02	09:24:55	4146.2	10green	284.12	---	---	---	20.296	---	---	---	1019.51	69.736	20.296	---	---	21.306	---	---	---	111.786	---	---	---	31.433	---	---	---
2020-09-02	09:24:56	4147.2	10green	284.04	---	---	---	20.303	---	---	---	1019.46	69.736	20.303	---	---	21.307	---	---	---	111.771	---	---	---	31.4	---	---	---
2020-09-02	09:24:57	4148.2	10green	283.98	---	---	---	20.31	---	---	---	1019.44	69.736	20.31	---	---	21.307	---	---	---	111.753	---	---	---	31.425	---	---	---
2020-09-02	09:24:58	4149.2	10green	283.91	---	---	---	20.316	---	---	---	1019.43	69.729	20.316	---	---	21.308	---	---	---	111.745	---	---	---	31.455	---	---	---
2020-09-02	09:24:59	4150.2	10green	283.91	---	---	---	20.32	---	---	---	1019.45	69.711	20.32	---	---	21.306	---	---	---	111.756	---	---	---	31.482	---	---	---
2020-09-02	09:25:00	4151.2	10green	283.97	---	---	---	20.322	---	---	---	1019.46	69.676	20.322	---	---	21.303	---	---	---	111.73	---	---	---	31.468	---	---	---
2020-09-02	09:25:01	4152.2	10green	283.98	---	---	---	20.324	---	---	---	1019.46	69.63	20.324	---	---	21.302	---	---	---	111.727	---	---	---	31.429	---	---	---
2020-09-02	09:25:02	4153.2	10green	283.87	---	---	---	20.328	---	---	---	1019.52	69.594	20.328	---	---	21.305	---	---	---	111.715	---	---	---	31.413	---	---	---
2020-09-02	09:25:03	4154.2	10green	283.72	---	---	---	20.331	---	---	---	1019.53	69.566	20.331	---	---	21.31	---	---	---	111.745	---	---	---	31.372	---	---	---
2020-09-02	09:25:04	4155.2	10green	283.69	---	---	---	20.335	---	---	---	1019.52	69.548	20.335	---	---	21.31	---	---	---	111.741	---	---	---	31.356	---	---	---
2020-09-02	09:25:45	4196.62	10orange	284.42	---	---	---	20.326	---	---	---	1019.5	69.449	20.326	---	---	21.284	---	---	---	111.633	---	---	---	29.044	---	---	---
2020-09-02	09:25:46	4197.63	10orange	284.98	---	---	---	20.321	---	---	---	1019.5	69.36	20.321	---	---	21.264	---	---	---	111.499	---	---	---	27.112	---	---	---
2020-09-02	09:25:47	4198.63	10orange	285.38	---	---	---	20.316	---	---	---	1019.54	69.269	20.316	---	---	21.25	---	---	---	111.38	---	---	---	24.975	---	---	---
2020-09-02	09:25:48	4199.62	10orange	285.11	---	---	---	20.323	---	---	---	1019.53	69.258	20.323	---	---	21.258	---	---	---	111.372	---	---	---	25.147	---	---	---
2020-09-02	09:25:49	4200.63	10orange	285.08	---	---	---	20.327	---	---	---	1019.53	69.248	20.327	---	---	21.258	---	---	---	111.368	---	---	---	24.953	---	---	---
2020-09-02	09:25:50	4201.63	10orange	285.06	---	---	---	20.33	---	---	---	1019.49	69.248	20.33	---	---	21.258	---	---	---	111.371	---	---	---	24.995	---	---	---
2020-09-02	09:25:51	4202.63	10orange	285.02	---	---	---	20.334	---	---	---	1019.48	69.248	20.334	---	---	21.258	---	---	---	111.358	---	---	---	25.036	---	---	---
2020-09-02	09:25:52	4203.63	10orange	284.85	---	---	---	20.336	---	---	---	1019.47	69.248	20.336	---	---	21.264	---	---	---	111.339	---	---	---	25.143	---	---	---
2020-09-02	09:25:53	4204.63	10orange	284.9	---	---	---	20.336	---	---	---	1019.48	69.248	20.336	---	---	21.262	---	---	---	111.339	---	---	---	25.253	---	---	---
2020-09-02	09:25:54	4205.62	10orange	285.01	---	---	---	20.335	---	---	---	1019.45	69.248	20.335	---	---	21.258	---	---	---	111.339	---	---	---	25.391	---	---	---
2020-09-02	09:25:55	4206.62	10orange	285.17	---	---	---	20.332	---	---	---	1019.44	69.24	20.332	---	---	21.253	---	---	---	111.352	---	---	---	25.463	---	---	---
2020-09-02	09:25:56	4207.62	10orange	285.22	---	---	---	20.33	---	---	---	1019.45	69.223	20.33	---	---	21.252	---	---	---	111.339	---	---	---	25.528	---	---	---
2020-09-02	09:25:57	4208.63	10orange	285.45	---	---	---	20.329	---	---	---	1019.45	69.205	20.329	---	---	21.243	---	---	---	111.335	---	---	---	25.515	---	---	---
2020-09-02	09:25:58	4209.62	10orange	285.5	---	---	---	20.327	---	---	---	1019.46	69.195	20.327	---	---	21.242	---	---	---	111.332	---	---	---	25.457	---	---	---
2020-09-02	09:25:59	4210.63	10orange	285.3	---	---	---	20.324	---	---	---	1019.5	69.205	20.324	---	---	21.251	---	---	---	111.317	---	---	---	25.387	---	---	---
2020-09-02	09:26:00	4211.63	10orange	285.02	---	---	---	20.324	---	---	---	1019.55	69.215	20.324	---	---	21.261	---	---	---	111.321	---	---	---	25.373	---	---	---
2020-09-02	09:26:01	4212.63	10orange	285.15	---	---	---	20.324	---	---	---	1019.56	69.233	20.324	---	---	21.256	---	---	---	111.315	---	---	---	25.402	---	---	---
2020-09-02	09:26:02	4213.63	10orange	285.12	---	---	---	20.324	---	---	---	1019.51	69.233	20.324	---	---	21.257	---	---	---	111.309	---	---	---	25.391	---	---	---
2020-09-02	09:26:03	4214.63	10orange	284.93	---	---	---	20.322	---	---	---	1019.49	69.233	20.322	---	---	21.266	---	---	---	111.283	---	---	---	25.345	---	---	---
2020-09-02	09:26:04	4215.63	10orange	284.73	---	---	---	20.318	---	---	---	1019.49	69.225	20.318	---	---	21.274	---	---	---	111.263	---	---	---	25.325	---	---	---
2020-09-02	09:26:05	4216.63	10orange	285.12	---	---	---	20.314	---	---	---	1019.55	69.225	20.314	---	---	21.261	---	---	---	111.268	---	---	---	25.308	---	---	---
2020-09-02	09:26:06	4217.63	10orange	285.47	---	---	---	20.309	---	---	---	1019.54	69.225	20.309	---	---	21.249	---	---	---	111.281	---	---	---	25.298	---	---	---
2020-09-02	09:26:56	4267.21	10red	282.75	---	---	---	20.326	---	---	---	1019.58	68.999	20.326	---	---	21.351	---	---	---	111.92	---	---	---	25.966	---	---	---
2020-09-02	09:26:57	4268.21	10red	279.82	---	---	---	20.347	---	---	---	1019.55	68.765	20.347	---	---	21.46	---	---	---	112.552	---	---	---	26.645	---	---	---
2020-09-02	09:26:58	4269.21	10red	277.02	---	---	---	20.367	---	---	---	1019.57	68.538	20.367	---	---	21.564	---	---	---	113.163	---	---	---	27.314	---	---	---
2020-09-02	09:26:59	4270.21	10red	276.88	---	---	---	20.367	---	---	---	1019.52	68.538	20.367	---	---	21.57	---	---	---	113.165	---	---	---	27.284	---	---	---
2020-09-02	09:27:00	4271.21	10red	276.87	---	---	---	20.365	---	---	---	1019.5	68.546	20.365	---	---	21.571	---	---	---	113.165	---	---	---	27.301	---	---	---
2020-09-02	09:27:01	4272.21	10red	276.74	---	---	---	20.361	---	---	---	1019.47	68.546	20.361	---	---	21.578	---	---	---	113.18	---	---	---	27.296	---	---	---
2020-09-02	09:27:02	4273.21	10red	276.88	---	---	---	20.355	---	---	---	1019.48	68.546	20.355	---	---	21.574	---	---	---	113.177	---	---	---	27.325	---	---	---
2020-09-02	09:27:03	4274.21	10red	276.84	---	---	---	20.35	---	---	---	1019.48	68.546	20.35	---	---	21.577	---	---	---	113.174	---	---	---	27.342	---	---	---
2020-09-02	09:27:04	4275.21	10red	276.86	---	---	---	20.345	---	---	---	1019.5	68.556	20.345	---	---	21.578	---	---	---	113.176	---	---	---	27.365	---	---	---
2020-09-02	09:27:05	4276.21	10red	276.91	---	---	---	20.34	---	---	---	1019.49	68.567	20.34	---	---	21.578	---	---	---	113.178	---	---	---	27.343	---	---	---
2020-09-02	09:27:06	4277.21	10red	276.89	---	---	---	20.333	---	---	---	1019.52	68.577	20.333	---	---	21.581	---	---	---	113.181	---	---	---	27.323	---	---	---
2020-09-02	09:27:07	4278.21	10red	276.96	---	---	---	20.325	---	---	---	1019.5	68.585	20.325	---	---	21.581	---	---	---	113.175	---	---	---	27.315	---	---	---
2020-09-02	09:27:08	4279.21	10red	276.98	---	---	---	20.315	---	---	---	1019.55	68.592	20.315	---	---	21.583	---	---	---	113.18	---	---	---	27.333	---	---	---
2020-09-02	09:27:09	4280.21	10red	277.26	---	---	---	20.308	---	---	---	1019.53	68.582	20.308	---	---	21.575	---	---	---	113.188	---	---	---	27.388	---	---	---
2020-09-02	09:27:10	4281.21	10red	277.35	---	---	---	20.301	---	---	---	1019.55	68.546	20.301	---	---	21.573	---	---	---	113.2	---	---	---	27.426	---	---	---
2020-09-02	09:27:11	4282.21	10red	277.45	---	---	---	20.295	---	---	---	1019.51	68.493	20.295	---	---	21.571	---	---	---	113.186	---	---	---	27.472	---	---	---
2020-09-02	09:27:12	4283.21	10red	277.51	---	---	---	20.282	---	---	---	1019.51	68.45	20.282	---	---	21.574	---	---	---	113.185	---	---	---	27.458	---	---	---
2020-09-02	09:27:13	4284.21	10red	277.62	---	---	---	20.267	---	---	---	1019.51	68.414	20.267	---	---	21.574	---	---	---	113.174	---	---	---	27.488	---	---	---
2020-09-02	09:27:14	4285.21	10red	277.84	---	---	---	20.249	---	---	---	1019.52	68.396	20.249	---	---	21.572	---	---	---	113.188	---	---	---	27.489	---	---	---
2020-09-02	09:27:15	4286.21	10red	277.88	---	---	---	20.236	---	---	---	1019.51	68.396	20.236	---	---	21.574	---	---	---	113.176	---	---	---	27.522	---	---	---
2020-09-02	09:27:16	4287.21	10red	277.99	---	---	---	20.225	---	---	---	1019.49	68.407	20.225	---	---	21.574	---	---	---	113.171	---	---	---	27.521	---	---	---
2020-09-02	09:27:17	4288.21	10red	278.01	---	---	---	20.216	---	---	---	1019.46	68.417	20.216	---	---	21.576	---	---	---	113.155	---	---	---	27.532	---	---	---
2020-09-02	09:27:18	4289.21	10red	278.1	---	---	---	20.205	---	---	---	1019.48	68.417	20.205	---	---	21.576	---	---	---	113.16	---	---	---	27.427	---	---	---
2020-09-02	09:27:19	4290.21	10red	277.94	---	---	---	20.195	---	---	---	1019.5	68.417	20.195	---	---	21.586	---	---	---	113.169	---	---	---	27.202	---	---	---
2020-09-02	09:50:33	5684.09	4white	294.52	---	---	---	18.518	---	---	---	1019.55	66.38	18.518	---	---	21.574	---	---	---	111.358	---	---	---	23.312	---	---	---
2020-09-02	09:50:34	5685.09	4white	311.11	---	---	---	16.845	---	---	---	1019.56	64.342	16.845	---	---	21.56	---	---	---	109.539	---	---	---	19.553	---	---	---
2020-09-02	09:50:35	5686.09	4white	327.74	---	---	---	15.177	---	---	---	1019.56	62.295	15.177	---	---	21.543	---	---	---	107.721	---	---	---	16.103	---	---	---
2020-09-02	09:50:36	5687.09	4white	327.66	---	---	---	15.18	---	---	---	1019.55	62.277	15.18	---	---	21.545	---	---	---	107.725	---	---	---	16.305	---	---	---
2020-09-02	09:50:37	5688.09	4white	327.47	---	---	---	15.181	---	---	---	1019.55	62.267	15.181	---	---	21.55	---	---	---	107.73	---	---	---	16.491	---	---	---
2020-09-02	09:50:38	5689.09	4white	327.75	---	---	---	15.183	---	---	---	1019.55	62.267	15.183	---	---	21.54	---	---	---	107.744	---	---	---	16.702	---	---	---
2020-09-02	09:50:39	5690.09	4white	327.73	---	---	---	15.182	---	---	---	1019.53	62.275	15.182	---	---	21.541	---	---	---	107.773	---	---	---	16.804	---	---	---
2020-09-02	09:50:40	5691.09	4white	327.91	---	---	---	15.183	---	---	---	1019.52	62.267	15.183	---	---	21.535	---	---	---	107.783	---	---	---	16.889	---	---	---
2020-09-02	09:50:41	5692.09	4white	327.79	---	---	---	15.182	---	---	---	1019.49	62.26	15.182	---	---	21.539	---	---	---	107.784	---	---	---	16.73	---	---	---
2020-09-02	09:50:42	5693.09	4white	327.81	---	---	---	15.181	---	---	---	1019.48	62.252	15.181	---	---	21.539	---	---	---	107.771	---	---	---	16.731	---	---	---
2020-09-02	09:50:43	5694.09	4white	327.83	---	---	---	15.18	---	---	---	1019.46	62.252	15.18	---	---	21.539	---	---	---	107.77	---	---	---	16.656	---	---	---
2020-09-02	09:50:44	5695.09	4white	327.73	---	---	---	15.181	---	---	---	1019.48	62.252	15.181	---	---	21.542	---	---	---	107.773	---	---	---	16.605	---	---	---
2020-09-02	09:50:45	5696.09	4white	327.84	---	---	---	15.183	---	---	---	1019.48	62.26	15.183	---	---	21.537	---	---	---	107.772	---	---	---	16.67	---	---	---
2020-09-02	09:50:46	5697.09	4white	327.82	---	---	---	15.185	---	---	---	1019.48	62.26	15.185	---	---	21.537	---	---	---	107.779	---	---	---	16.832	---	---	---
2020-09-02	09:50:47	5698.09	4white	327.96	---	---	---	15.185	---	---	---	1019.48	62.267	15.185	---	---	21.532	---	---	---	107.785	---	---	---	16.925	---	---	---
2020-09-02	09:51:24	5735.09	4blue	330.89	---	---	---	15.164	---	---	---	1019.49	62.183	15.164	---	---	21.442	---	---	---	107.192	---	---	---	23.084	---	---	---
2020-09-02	09:51:25	5736.09	4blue	333.74	---	---	---	15.146	---	---	---	1019.5	62.115	15.146	---	---	21.353	---	---	---	106.617	---	---	---	29.05	---	---	---
2020-09-02	09:51:26	5737.09	4blue	336.57	---	---	---	15.127	---	---	---	1019.51	62.059	15.127	---	---	21.265	---	---	---	106.016	---	---	---	35.27	---	---	---
2020-09-02	09:51:27	5738.09	4blue	336.64	---	---	---	15.13	---	---	---	1019.49	62.097	15.13	---	---	21.261	---	---	---	106.075	---	---	---	34.247	---	---	---
2020-09-02	09:51:28	5739.09	4blue	336.62	---	---	---	15.134	---	---	---	1019.51	62.138	15.134	---	---	21.26	---	---	---	106.111	---	---	---	33.225	---	---	---
2020-09-02	09:51:29	5740.09	4blue	336.69	---	---	---	15.136	---	---	---	1019.47	62.166	15.136	---	---	21.257	---	---	---	106.082	---	---	---	33.707	---	---	---
2020-09-02	09:51:30	5741.09	4blue	336.51	---	---	---	15.138	---	---	---	1019.47	62.183	15.138	---	---	21.262	---	---	---	106.018	---	---	---	34.04	---	---	---
2020-09-02	09:51:31	5742.09	4blue	336.65	---	---	---	15.135	---	---	---	1019.47	62.191	15.135	---	---	21.259	---	---	---	105.943	---	---	---	35.584	---	---	---
2020-09-02	09:51:32	5743.09	4blue	336.53	---	---	---	15.135	---	---	---	1019.49	62.191	15.135	---	---	21.263	---	---	---	105.951	---	---	---	35.396	---	---	---
2020-09-02	09:51:33	5744.09	4blue	336.71	---	---	---	15.135	---	---	---	1019.5	62.183	15.135	---	---	21.257	---	---	---	105.933	---	---	---	36.417	---	---	---
2020-09-02	09:51:34	5745.09	4blue	336.75	---	---	---	15.136	---	---	---	1019.48	62.166	15.136	---	---	21.255	---	---	---	105.929	---	---	---	36.252	---	---	---
2020-09-02	09:51:35	5746.09	4blue	336.62	---	---	---	15.137	---	---	---	1019.49	62.117	15.137	---	---	21.259	---	---	---	105.916	---	---	---	36.178	---	---	---
2020-09-02	09:51:36	5747.09	4blue	336.36	---	---	---	15.139	---	---	---	1019.49	62.069	15.139	---	---	21.267	---	---	---	105.917	---	---	---	36.001	---	---	---
2020-09-02	09:51:37	5748.09	4blue	336.37	---	---	---	15.138	---	---	---	1019.51	62.021	15.138	---	---	21.267	---	---	---	105.914	---	---	---	36.002	---	---	---
2020-09-02	09:51:38	5749.09	4blue	336.56	---	---	---	15.137	---	---	---	1019.49	62.003	15.137	---	---	21.261	---	---	---	105.912	---	---	---	35.911	---	---	---
2020-09-02	09:51:39	5750.09	4blue	336.63	---	---	---	15.136	---	---	---	1019.49	61.993	15.136	---	---	21.26	---	---	---	105.891	---	---	---	36.108	---	---	---
2020-09-02	09:52:33	5803.92	4orange	335.62	---	---	---	15.136	---	---	---	1019.48	61.655	15.136	---	---	21.293	---	---	---	106.006	---	---	---	34.899	---	---	---
2020-09-02	09:52:34	5804.92	4orange	335.11	---	---	---	15.138	---	---	---	1019.49	61.316	15.138	---	---	21.309	---	---	---	106.122	---	---	---	33.745	---	---	---
2020-09-02	09:52:35	5805.92	4orange	334.73	---	---	---	15.142	---	---	---	1019.5	60.986	15.142	---	---	21.321	---	---	---	106.246	---	---	---	32.447	---	---	---
2020-09-02	09:52:36	5806.92	4orange	334.93	---	---	---	15.145	---	---	---	1019.51	61.003	15.145	---	---	21.313	---	---	---	106.247	---	---	---	32.633	---	---	---
2020-09-02	09:52:37	5807.92	4orange	334.79	---	---	---	15.147	---	---	---	1019.52	61.031	15.147	---	---	21.317	---	---	---	106.243	---	---	---	32.799	---	---	---
2020-09-02	09:52:38	5808.92	4orange	334.35	---	---	---	15.149	---	---	---	1019.52	61.062	15.149	---	---	21.331	---	---	---	106.254	---	---	---	32.848	---	---	---
2020-09-02	09:52:39	5809.92	4orange	334.25	---	---	---	15.149	---	---	---	1019.47	61.092	15.149	---	---	21.334	---	---	---	106.277	---	---	---	32.651	---	---	---
2020-09-02	09:52:40	5810.92	4orange	334.01	---	---	---	15.15	---	---	---	1019.46	61.12	15.15	---	---	21.341	---	---	---	106.261	---	---	---	33.655	---	---	---
2020-09-02	09:52:41	5811.92	4orange	334.1	---	---	---	15.149	---	---	---	1019.47	61.138	15.149	---	---	21.339	---	---	---	106.238	---	---	---	34.098	---	---	---
2020-09-02	09:52:42	5812.92	4orange	334.08	---	---	---	15.149	---	---	---	1019.49	61.146	15.149	---	---	21.339	---	---	---	106.196	---	---	---	34.743	---	---	---
2020-09-02	09:52:43	5813.92	4orange	334.25	---	---	---	15.15	---	---	---	1019.47	61.138	15.15	---	---	21.333	---	---	---	106.209	---	---	---	34.035	---	---	---
2020-09-02	09:52:44	5814.92	4orange	334.54	---	---	---	15.15	---	---	---	1019.44	61.1	15.15	---	---	21.324	---	---	---	106.195	---	---	---	34.054	---	---	---
2020-09-02	09:56:03	6014.31	4green	332.81	---	---	---	15.194	---	---	---	1019.49	60.665	15.194	---	---	21.365	---	---	---	106.194	---	---	---	37.276	---	---	---
2020-09-02	09:56:04	6015.31	4green	330.83	---	---	---	15.241	---	---	---	1019.53	60.248	15.241	---	---	21.414	---	---	---	106.182	---	---	---	40.617	---	---	---
2020-09-02	09:56:05	6016.31	4green	328.75	---	---	---	15.289	---	---	---	1019.56	59.882	15.289	---	---	21.467	---	---	---	106.193	---	---	---	43.905	---	---	---
2020-09-02	09:56:06	6017.31	4green	328.47	---	---	---	15.293	---	---	---	1019.53	59.923	15.293	---	---	21.474	---	---	---	106.187	---	---	---	43.928	---	---	---
2020-09-02	09:56:07	6018.31	4green	328.47	---	---	---	15.295	---	---	---	1019.53	59.963	15.295	---	---	21.474	---	---	---	106.198	---	---	---	43.937	---	---	---
2020-09-02	09:56:08	6019.31	4green	328.35	---	---	---	15.296	---	---	---	1019.53	59.991	15.296	---	---	21.477	---	---	---	106.176	---	---	---	43.979	---	---	---
2020-09-02	09:56:09	6020.31	4green	328.52	---	---	---	15.296	---	---	---	1019.54	60.009	15.296	---	---	21.472	---	---	---	106.149	---	---	---	43.727	---	---	---
2020-09-02	09:56:10	6021.31	4green	328.74	---	---	---	15.295	---	---	---	1019.55	60.027	15.295	---	---	21.464	---	---	---	106.111	---	---	---	43.854	---	---	---
2020-09-02	09:56:11	6022.31	4green	329.13	---	---	---	15.295	---	---	---	1019.54	60.047	15.295	---	---	21.451	---	---	---	106.069	---	---	---	43.703	---	---	---
2020-09-02	09:56:12	6023.31	4green	329.37	---	---	---	15.293	---	---	---	1019.53	60.057	15.293	---	---	21.444	---	---	---	106.018	---	---	---	43.876	---	---	---
2020-09-02	09:56:13	6024.31	4green	329.7	---	---	---	15.294	---	---	---	1019.49	60.047	15.294	---	---	21.432	---	---	---	105.965	---	---	---	43.922	---	---	---
2020-09-02	09:56:14	6025.31	4green	329.76	---	---	---	15.295	---	---	---	1019.5	60.009	15.295	---	---	21.43	---	---	---	105.928	---	---	---	43.881	---	---	---
2020-09-02	09:56:15	6026.31	4green	329.98	---	---	---	15.298	---	---	---	1019.52	59.971	15.298	---	---	21.421	---	---	---	105.915	---	---	---	43.956	---	---	---
2020-09-02	09:56:16	6027.31	4green	329.92	---	---	---	15.3	---	---	---	1019.54	59.943	15.3	---	---	21.422	---	---	---	105.908	---	---	---	43.809	---	---	---
2020-09-02	09:56:17	6028.31	4green	329.64	---	---	---	15.303	---	---	---	1019.55	59.933	15.303	---	---	21.431	---	---	---	105.945	---	---	---	43.852	---	---	---
2020-09-02	09:56:18	6029.31	4green	329.27	---	---	---	15.302	---	---	---	1019.54	59.943	15.302	---	---	21.444	---	---	---	105.994	---	---	---	43.783	---	---	---
2020-09-02	09:56:19	6030.31	4green	328.95	---	---	---	15.302	---	---	---	1019.56	59.953	15.302	---	---	21.455	---	---	---	106.069	---	---	---	43.802	---	---	---
2020-09-02	09:56:53	6064.56	4yellow	325.61	---	---	---	15.294	---	---	---	1019.55	59.943	15.294	---	---	21.574	---	---	---	106.786	---	---	---	39.906	---	---	---
2020-09-02	09:56:54	6065.56	4yellow	322	---	---	---	15.289	---	---	---	1019.56	59.933	15.289	---	---	21.701	---	---	---	107.486	---	---	---	36.021	---	---	---
2020-09-02	09:56:55	6066.56	4yellow	318.28	---	---	---	15.285	---	---	---	1019.54	59.933	15.285	---	---	21.832	---	---	---	108.161	---	---	---	32.04	---	---	---
2020-09-02	09:56:56	6067.56	4yellow	318.1	---	---	---	15.289	---	---	---	1019.54	59.963	15.289	---	---	21.837	---	---	---	108.193	---	---	---	30.354	---	---	---
2020-09-02	09:56:57	6068.56	4yellow	318.26	---	---	---	15.293	---	---	---	1019.53	59.984	15.293	---	---	21.83	---	---	---	108.199	---	---	---	30.262	---	---	---
2020-09-02	09:56:58	6069.56	4yellow	318.27	---	---	---	15.295	---	---	---	1019.53	59.994	15.295	---	---	21.829	---	---	---	108.196	---	---	---	30.29	---	---	---
2020-09-02	09:56:59	6070.56	4yellow	318.47	---	---	---	15.298	---	---	---	1019.52	60.002	15.298	---	---	21.821	---	---	---	108.158	---	---	---	31.975	---	---	---
2020-09-02	09:57:00	6071.56	4yellow	318.4	---	---	---	15.298	---	---	---	1019.52	60.019	15.298	---	---	21.823	---	---	---	108.141	---	---	---	32.044	---	---	---
2020-09-02	09:57:01	6072.56	4yellow	318.39	---	---	---	15.3	---	---	---	1019.53	60.047	15.3	---	---	21.823	---	---	---	108.124	---	---	---	31.953	---	---	---
2020-09-02	09:57:02	6073.56	4yellow	318.23	---	---	---	15.3	---	---	---	1019.52	60.088	15.3	---	---	21.828	---	---	---	108.115	---	---	---	31.916	---	---	---
2020-09-02	09:57:03	6074.56	4yellow	318.35	---	---	---	15.302	---	---	---	1019.51	60.136	15.302	---	---	21.824	---	---	---	108.143	---	---	---	27.978	---	---	---
2020-09-02	09:57:04	6075.56	4yellow	318.19	---	---	---	15.302	---	---	---	1019.51	60.164	15.302	---	---	21.829	---	---	---	108.173	---	---	---	25.813	---	---	---
2020-09-02	09:57:05	6076.56	4yellow	318.09	---	---	---	15.298	---	---	---	1019.55	60.164	15.298	---	---	21.834	---	---	---	108.216	---	---	---	23.859	---	---	---
2020-09-02	09:57:06	6077.56	4yellow	318.07	---	---	---	15.291	---	---	---	1019.54	60.126	15.291	---	---	21.837	---	---	---	108.231	---	---	---	25.874	---	---	---
2020-09-02	09:57:07	6078.56	4yellow	318.51	---	---	---	15.278	---	---	---	1019.55	60.078	15.278	---	---	21.827	---	---	---	108.235	---	---	---	26.167	---	---	---
2020-09-02	09:57:08	6079.56	4yellow	318.69	---	---	---	15.265	---	---	---	1019.53	60.037	15.265	---	---	21.825	---	---	---	108.221	---	---	---	26.477	---	---	---
2020-09-02	09:57:09	6080.56	4yellow	318.62	---	---	---	15.252	---	---	---	1019.54	60.017	15.252	---	---	21.833	---	---	---	108.219	---	---	---	26.753	---	---	---
2020-09-02	09:57:10	6081.56	4yellow	318.82	---	---	---	15.239	---	---	---	1019.5	60.027	15.239	---	---	21.831	---	---	---	108.22	---	---	---	26.931	---	---	---
2020-09-02	09:57:11	6082.56	4yellow	318.84	---	---	---	15.228	---	---	---	1019.5	60.047	15.228	---	---	21.834	---	---	---	108.223	---	---	---	26.671	---	---	---
2020-09-02	09:57:12	6083.56	4yellow	318.93	---	---	---	15.22	---	---	---	1019.5	60.068	15.22	---	---	21.834	---	---	---	108.216	---	---	---	26.693	---	---	---
2020-09-02	09:57:59	6129.92	4red	319.65	---	---	---	15.244	---	---	---	1019.54	59.826	15.244	---	---	21.799	---	---	---	107.905	---	---	---	28.918	---	---	---
2020-09-02	09:58:00	6130.92	4red	320.44	---	---	---	15.27	---	---	---	1019.56	59.554	15.27	---	---	21.762	---	---	---	107.607	---	---	---	31.349	---	---	---
2020-09-02	09:58:01	6131.92	4red	321.31	---	---	---	15.299	---	---	---	1019.56	59.264	15.299	---	---	21.72	---	---	---	107.297	---	---	---	33.41	---	---	---
2020-09-02	09:58:02	6132.92	4red	321.21	---	---	---	15.302	---	---	---	1019.56	59.205	15.302	---	---	21.722	---	---	---	107.291	---	---	---	33.428	---	---	---
2020-09-02	09:58:03	6133.92	4red	321.43	---	---	---	15.306	---	---	---	1019.54	59.167	15.306	---	---	21.713	---	---	---	107.276	---	---	---	33.403	---	---	---
2020-09-02	09:58:04	6134.92	4red	321.67	---	---	---	15.309	---	---	---	1019.56	59.167	15.309	---	---	21.704	---	---	---	107.277	---	---	---	33.417	---	---	---
2020-09-02	09:58:05	6135.92	4red	321.65	---	---	---	15.309	---	---	---	1019.53	59.205	15.309	---	---	21.704	---	---	---	107.277	---	---	---	33.386	---	---	---
2020-09-02	09:58:06	6136.92	4red	321.5	---	---	---	15.307	---	---	---	1019.55	59.264	15.307	---	---	21.71	---	---	---	107.272	---	---	---	33.379	---	---	---
2020-09-02	09:58:07	6137.92	4red	321.07	---	---	---	15.305	---	---	---	1019.53	59.312	15.305	---	---	21.726	---	---	---	107.283	---	---	---	33.318	---	---	---
2020-09-02	09:58:08	6138.92	4red	321.03	---	---	---	15.303	---	---	---	1019.55	59.36	15.303	---	---	21.728	---	---	---	107.297	---	---	---	33.234	---	---	---
2020-09-02	09:58:09	6139.92	4red	321.03	---	---	---	15.303	---	---	---	1019.54	59.399	15.303	---	---	21.728	---	---	---	107.34	---	---	---	33.122	---	---	---
2020-09-02	09:58:10	6140.92	4red	321.06	---	---	---	15.302	---	---	---	1019.57	59.409	15.302	---	---	21.727	---	---	---	107.36	---	---	---	33.067	---	---	---
2020-09-02	09:58:11	6141.92	4red	320.98	---	---	---	15.302	---	---	---	1019.6	59.381	15.302	---	---	21.73	---	---	---	107.396	---	---	---	33.044	---	---	---
2020-09-02	09:58:12	6142.92	4red	320.89	---	---	---	15.305	---	---	---	1019.61	59.314	15.305	---	---	21.732	---	---	---	107.389	---	---	---	33.048	---	---	---
2020-09-02	09:58:13	6143.92	4red	321.15	---	---	---	15.309	---	---	---	1019.6	59.246	15.309	---	---	21.722	---	---	---	107.378	---	---	---	33.032	---	---	---
2020-09-02	09:58:14	6144.92	4red	321.13	---	---	---	15.312	---	---	---	1019.59	59.177	15.312	---	---	21.721	---	---	---	107.356	---	---	---	33.016	---	---	---
2020-09-02	10:17:19	7290.73	5white	322.38	---	---	---	15.316	---	---	---	1019.6	60.024	15.316	---	---	21.676	---	---	---	107.111	---	---	---	28.376	---	---	---
2020-09-02	10:17:20	7291.73	5white	323.07	---	---	---	15.32	---	---	---	1019.59	60.912	15.32	---	---	21.651	---	---	---	106.874	---	---	---	23.772	---	---	---
2020-09-02	10:17:21	7292.73	5white	324.31	---	---	---	15.32	---	---	---	1019.59	61.837	15.32	---	---	21.607	---	---	---	106.636	---	---	---	19.158	---	---	---
2020-09-02	10:17:22	7293.73	5white	324.23	---	---	---	15.314	---	---	---	1019.56	61.886	15.314	---	---	21.612	---	---	---	106.641	---	---	---	19.199	---	---	---
2020-09-02	10:17:23	7294.73	5white	324.86	---	---	---	15.302	---	---	---	1019.56	61.924	15.302	---	---	21.595	---	---	---	106.631	---	---	---	19.22	---	---	---
2020-09-02	10:17:24	7295.73	5white	324.84	---	---	---	15.292	---	---	---	1019.55	61.945	15.292	---	---	21.599	---	---	---	106.628	---	---	---	19.233	---	---	---
2020-09-02	10:17:25	7296.74	5white	324.79	---	---	---	15.277	---	---	---	1019.6	61.955	15.277	---	---	21.607	---	---	---	106.638	---	---	---	19.161	---	---	---
2020-09-02	10:17:26	7297.73	5white	324.82	---	---	---	15.265	---	---	---	1019.62	61.955	15.265	---	---	21.61	---	---	---	106.643	---	---	---	19.111	---	---	---
2020-09-02	10:17:27	7298.73	5white	325.31	---	---	---	15.255	---	---	---	1019.64	61.945	15.255	---	---	21.597	---	---	---	106.637	---	---	---	19.032	---	---	---
2020-09-02	10:17:28	7299.73	5white	325.5	---	---	---	15.252	---	---	---	1019.62	61.934	15.252	---	---	21.592	---	---	---	106.634	---	---	---	19.031	---	---	---
2020-09-02	10:17:29	7300.73	5white	325.12	---	---	---	15.252	---	---	---	1019.59	61.934	15.252	---	---	21.605	---	---	---	106.638	---	---	---	18.992	---	---	---
2020-09-02	10:17:30	7301.73	5white	324.95	---	---	---	15.252	---	---	---	1019.58	61.945	15.252	---	---	21.611	---	---	---	106.645	---	---	---	19.003	---	---	---
2020-09-02	10:17:31	7302.73	5white	324.91	---	---	---	15.252	---	---	---	1019.56	61.965	15.252	---	---	21.612	---	---	---	106.633	---	---	---	18.989	---	---	---
2020-09-02	10:17:32	7303.74	5white	325.35	---	---	---	15.249	---	---	---	1019.56	61.975	15.249	---	---	21.598	---	---	---	106.634	---	---	---	18.957	---	---	---
2020-09-02	10:17:33	7304.73	5white	325.19	---	---	---	15.249	---	---	---	1019.58	61.975	15.249	---	---	21.604	---	---	---	106.629	---	---	---	18.956	---	---	---
2020-09-02	10:17:34	7305.73	5white	325.44	---	---	---	15.246	---	---	---	1019.59	61.955	15.246	---	---	21.596	---	---	---	106.63	---	---	---	18.936	---	---	---
2020-09-02	10:17:35	7306.73	5white	325.73	---	---	---	15.245	---	---	---	1019.63	61.924	15.245	---	---	21.587	---	---	---	106.626	---	---	---	18.942	---	---	---
2020-09-02	10:17:36	7307.74	5white	325.8	---	---	---	15.242	---	---	---	1019.61	61.893	15.242	---	---	21.585	---	---	---	106.619	---	---	---	18.935	---	---	---
2020-09-02	10:17:37	7308.73	5white	325.98	---	---	---	15.239	---	---	---	1019.61	61.883	15.239	---	---	21.58	---	---	---	106.623	---	---	---	18.93	---	---	---
2020-09-02	10:17:38	7309.73	5white	325.79	---	---	---	15.238	---	---	---	1019.59	61.893	15.238	---	---	21.587	---	---	---	106.612	---	---	---	18.927	---	---	---
2020-09-02	10:17:39	7310.73	5white	325.91	---	---	---	15.24	---	---	---	1019.58	61.924	15.24	---	---	21.582	---	---	---	106.626	---	---	---	18.915	---	---	---
2020-09-02	10:17:40	7311.73	5white	325.86	---	---	---	15.244	---	---	---	1019.57	61.962	15.244	---	---	21.582	---	---	---	106.631	---	---	---	18.902	---	---	---
2020-09-02	10:17:41	7312.73	5white	325.64	---	---	---	15.247	---	---	---	1019.57	62.021	15.247	---	---	21.589	---	---	---	106.652	---	---	---	18.857	---	---	---
2020-09-02	10:17:42	7313.74	5white	325.74	---	---	---	15.247	---	---	---	1019.58	62.117	15.247	---	---	21.585	---	---	---	106.674	---	---	---	18.827	---	---	---
2020-09-02	10:17:43	7314.73	5white	325.79	---	---	---	15.245	---	---	---	1019.57	62.224	15.245	---	---	21.584	---	---	---	106.675	---	---	---	18.8	---	---	---
2020-09-02	10:17:44	7315.73	5white	325.71	---	---	---	15.245	---	---	---	1019.56	62.292	15.245	---	---	21.587	---	---	---	106.679	---	---	---	18.786	---	---	---
2020-09-02	10:18:19	7350.42	5green	326.52	---	---	---	15.265	---	---	---	1019.56	62.234	15.265	---	---	21.552	---	---	---	106.498	---	---	---	29.155	---	---	---
2020-09-02	10:18:20	7351.42	5green	327.33	---	---	---	15.296	---	---	---	1019.55	62.148	15.296	---	---	21.513	---	---	---	106.326	---	---	---	38.698	---	---	---
2020-09-02	10:18:21	7352.42	5green	328.44	---	---	---	15.329	---	---	---	1019.57	62.059	15.329	---	---	21.462	---	---	---	106.149	---	---	---	48.566	---	---	---
2020-09-02	10:18:22	7353.42	5green	328.57	---	---	---	15.342	---	---	---	1019.58	62.048	15.342	---	---	21.453	---	---	---	106.127	---	---	---	48.352	---	---	---
2020-09-02	10:18:23	7354.42	5green	328.59	---	---	---	15.338	---	---	---	1019.62	62.028	15.338	---	---	21.453	---	---	---	106.105	---	---	---	48.839	---	---	---
2020-09-02	10:18:24	7355.42	5green	328.73	---	---	---	15.325	---	---	---	1019.63	62.018	15.325	---	---	21.453	---	---	---	106.066	---	---	---	49.2	---	---	---
2020-09-02	10:18:25	7356.42	5green	328.93	---	---	---	15.305	---	---	---	1019.6	62.008	15.305	---	---	21.454	---	---	---	106.066	---	---	---	49.72	---	---	---
2020-09-02	10:18:26	7357.42	5green	329.15	---	---	---	15.291	---	---	---	1019.6	62.008	15.291	---	---	21.452	---	---	---	106.07	---	---	---	50.01	---	---	---
2020-09-02	10:18:27	7358.42	5green	329.39	---	---	---	15.28	---	---	---	1019.58	62	15.28	---	---	21.448	---	---	---	106.101	---	---	---	50.026	---	---	---
2020-09-02	10:18:28	7359.42	5green	329.27	---	---	---	15.273	---	---	---	1019.61	61.993	15.273	---	---	21.455	---	---	---	106.114	---	---	---	49.539	---	---	---
2020-09-02	10:18:29	7360.42	5green	329.21	---	---	---	15.267	---	---	---	1019.61	61.975	15.267	---	---	21.459	---	---	---	106.136	---	---	---	49.753	---	---	---
2020-09-02	10:18:30	7361.42	5green	328.98	---	---	---	15.263	---	---	---	1019.6	61.975	15.263	---	---	21.468	---	---	---	106.17	---	---	---	49.531	---	---	---
2020-09-02	10:18:31	7362.42	5green	329.11	---	---	---	15.26	---	---	---	1019.57	61.975	15.26	---	---	21.465	---	---	---	106.182	---	---	---	50.264	---	---	---
2020-09-02	10:18:32	7363.42	5green	329.12	---	---	---	15.259	---	---	---	1019.55	61.975	15.259	---	---	21.465	---	---	---	106.175	---	---	---	49.742	---	---	---
2020-09-02	10:18:33	7364.42	5green	329.47	---	---	---	15.26	---	---	---	1019.57	61.955	15.26	---	---	21.453	---	---	---	106.127	---	---	---	49.741	---	---	---
2020-09-02	10:18:34	7365.42	5green	329.68	---	---	---	15.255	---	---	---	1019.59	61.924	15.255	---	---	21.448	---	---	---	106.103	---	---	---	48.693	---	---	---
2020-09-02	10:18:35	7366.42	5green	330.66	---	---	---	15.249	---	---	---	1019.61	61.903	15.249	---	---	21.417	---	---	---	105.97	---	---	---	48.661	---	---	---
2020-09-02	10:18:36	7367.42	5green	331.47	---	---	---	15.241	---	---	---	1019.61	61.883	15.241	---	---	21.392	---	---	---	105.78	---	---	---	48.507	---	---	---
2020-09-02	10:18:37	7368.42	5green	331.78	---	---	---	15.24	---	---	---	1019.64	61.873	15.24	---	---	21.382	---	---	---	105.729	---	---	---	48.663	---	---	---
2020-09-02	10:18:38	7369.42	5green	330.96	---	---	---	15.238	---	---	---	1019.63	61.863	15.238	---	---	21.411	---	---	---	105.843	---	---	---	48.831	---	---	---
2020-09-02	10:18:39	7370.42	5green	329.92	---	---	---	15.238	---	---	---	1019.61	61.863	15.238	---	---	21.446	---	---	---	106.05	---	---	---	49.236	---	---	---
2020-09-02	10:18:40	7371.42	5green	329.64	---	---	---	15.24	---	---	---	1019.56	61.863	15.24	---	---	21.455	---	---	---	106.091	---	---	---	49.002	---	---	---
2020-09-02	10:18:41	7372.42	5green	329.68	---	---	---	15.248	---	---	---	1019.54	61.863	15.248	---	---	21.45	---	---	---	106.032	---	---	---	48.484	---	---	---
2020-09-02	10:18:42	7373.42	5green	330.02	---	---	---	15.258	---	---	---	1019.53	61.863	15.258	---	---	21.435	---	---	---	106.009	---	---	---	48.246	---	---	---
2020-09-02	10:18:43	7374.42	5green	329.89	---	---	---	15.273	---	---	---	1019.54	61.873	15.273	---	---	21.434	---	---	---	106.027	---	---	---	48.397	---	---	---
2020-09-02	10:19:23	7413.89	5orange	330.09	---	---	---	15.274	---	---	---	1019.59	61.865	15.274	---	---	21.427	---	---	---	106.04	---	---	---	50.29	---	---	---
2020-09-02	10:19:24	7414.9	5orange	329.96	---	---	---	15.274	---	---	---	1019.63	61.858	15.274	---	---	21.431	---	---	---	105.997	---	---	---	51.895	---	---	---
2020-09-02	10:19:25	7415.9	5orange	330.14	---	---	---	15.267	---	---	---	1019.64	61.848	15.267	---	---	21.427	---	---	---	105.993	---	---	---	52.396	---	---	---
2020-09-02	10:19:26	7416.9	5orange	330.22	---	---	---	15.267	---	---	---	1019.62	61.855	15.267	---	---	21.425	---	---	---	106	---	---	---	51.18	---	---	---
2020-09-02	10:19:27	7417.9	5orange	330.28	---	---	---	15.264	---	---	---	1019.61	61.863	15.264	---	---	21.424	---	---	---	106.021	---	---	---	49.847	---	---	---
2020-09-02	10:19:28	7418.9	5orange	330.55	---	---	---	15.256	---	---	---	1019.6	61.855	15.256	---	---	21.418	---	---	---	105.921	---	---	---	50.531	---	---	---
2020-09-02	10:19:29	7419.9	5orange	330.56	---	---	---	15.25	---	---	---	1019.59	61.838	15.25	---	---	21.42	---	---	---	105.873	---	---	---	52.26	---	---	---
2020-09-02	10:19:30	7420.89	5orange	330.78	---	---	---	15.244	---	---	---	1019.58	61.81	15.244	---	---	21.414	---	---	---	105.811	---	---	---	54.047	---	---	---
2020-09-02	10:19:31	7421.89	5orange	330.73	---	---	---	15.241	---	---	---	1019.57	61.789	15.241	---	---	21.417	---	---	---	105.838	---	---	---	54.52	---	---	---
2020-09-02	10:19:32	7422.9	5orange	330.56	---	---	---	15.235	---	---	---	1019.59	61.769	15.235	---	---	21.425	---	---	---	105.888	---	---	---	53.758	---	---	---
2020-09-02	10:19:33	7423.9	5orange	330.4	---	---	---	15.23	---	---	---	1019.61	61.759	15.23	---	---	21.432	---	---	---	105.915	---	---	---	53.6	---	---	---
2020-09-02	10:19:34	7424.9	5orange	330.52	---	---	---	15.225	---	---	---	1019.63	61.749	15.225	---	---	21.43	---	---	---	105.916	---	---	---	53.912	---	---	---
2020-09-02	10:19:35	7425.9	5orange	330.56	---	---	---	15.223	---	---	---	1019.61	61.749	15.223	---	---	21.43	---	---	---	105.905	---	---	---	54.119	---	---	---
2020-09-02	10:19:36	7426.9	5orange	330.67	---	---	---	15.222	---	---	---	1019.6	61.749	15.222	---	---	21.426	---	---	---	105.92	---	---	---	54.345	---	---	---
2020-09-02	10:19:37	7427.9	5orange	330.42	---	---	---	15.221	---	---	---	1019.58	61.749	15.221	---	---	21.435	---	---	---	105.932	---	---	---	54.254	---	---	---
2020-09-02	10:19:38	7428.9	5orange	330.65	---	---	---	15.22	---	---	---	1019.58	61.749	15.22	---	---	21.428	---	---	---	105.929	---	---	---	54.422	---	---	---
2020-09-02	10:19:39	7429.9	5orange	330.45	---	---	---	15.219	---	---	---	1019.57	61.749	15.219	---	---	21.435	---	---	---	105.924	---	---	---	54.023	---	---	---
2020-09-02	10:19:40	7430.9	5orange	330.77	---	---	---	15.217	---	---	---	1019.58	61.749	15.217	---	---	21.425	---	---	---	105.93	---	---	---	53.611	---	---	---
2020-09-02	10:23:00	7631.37	5red	327.62	---	---	---	15.397	---	---	---	1019.62	61.886	15.397	---	---	21.466	---	---	---	106.048	---	---	---	48.805	---	---	---
2020-09-02	10:23:01	7632.37	5red	324.79	---	---	---	15.577	---	---	---	1019.65	62.041	15.577	---	---	21.496	---	---	---	106.182	---	---	---	43.618	---	---	---
2020-09-02	10:23:02	7633.37	5red	321.66	---	---	---	15.76	---	---	---	1019.71	62.196	15.76	---	---	21.535	---	---	---	106.285	---	---	---	38.655	---	---	---
2020-09-02	10:23:03	7634.37	5red	321.9	---	---	---	15.762	---	---	---	1019.69	62.214	15.762	---	---	21.526	---	---	---	106.258	---	---	---	38.66	---	---	---
2020-09-02	10:23:04	7635.37	5red	322.04	---	---	---	15.762	---	---	---	1019.67	62.214	15.762	---	---	21.521	---	---	---	106.185	---	---	---	38.848	---	---	---
2020-09-02	10:23:05	7636.37	5red	322.55	---	---	---	15.759	---	---	---	1019.65	62.206	15.759	---	---	21.504	---	---	---	106.153	---	---	---	39.722	---	---	---
2020-09-02	10:23:06	7637.37	5red	323.04	---	---	---	15.751	---	---	---	1019.64	62.199	15.751	---	---	21.49	---	---	---	106.129	---	---	---	40.194	---	---	---
2020-09-02	10:23:07	7638.37	5red	323.71	---	---	---	15.742	---	---	---	1019.61	62.181	15.742	---	---	21.471	---	---	---	106.1	---	---	---	40.574	---	---	---
2020-09-02	10:23:08	7639.37	5red	324.03	---	---	---	15.731	---	---	---	1019.58	62.171	15.731	---	---	21.463	---	---	---	106.033	---	---	---	40.425	---	---	---
2020-09-02	10:23:09	7640.37	5red	324.48	---	---	---	15.723	---	---	---	1019.57	62.151	15.723	---	---	21.451	---	---	---	105.977	---	---	---	40.07	---	---	---
2020-09-02	10:23:10	7641.37	5red	324.22	---	---	---	15.718	---	---	---	1019.62	62.12	15.718	---	---	21.462	---	---	---	105.974	---	---	---	38.671	---	---	---
2020-09-02	10:23:11	7642.37	5red	324.29	---	---	---	15.718	---	---	---	1019.63	62.079	15.718	---	---	21.459	---	---	---	106.021	---	---	---	35.925	---	---	---
2020-09-02	10:23:12	7643.37	5red	323.82	---	---	---	15.72	---	---	---	1019.65	62.041	15.72	---	---	21.475	---	---	---	106.08	---	---	---	33.204	---	---	---
2020-09-02	10:23:13	7644.37	5red	324.14	---	---	---	15.715	---	---	---	1019.66	62.013	15.715	---	---	21.466	---	---	---	106.14	---	---	---	31.919	---	---	---
2020-09-02	10:23:14	7645.37	5red	324.16	---	---	---	15.701	---	---	---	1019.69	62.006	15.701	---	---	21.47	---	---	---	106.157	---	---	---	31.655	---	---	---
2020-09-02	10:23:15	7646.37	5red	324.45	---	---	---	15.676	---	---	---	1019.68	62.006	15.676	---	---	21.47	---	---	---	106.186	---	---	---	31.509	---	---	---
[truncated: 1,592 more rows]

## Sheet: Nutrients_Raw
Sample Number	Core_comment	NOx	NO2	Si	PO4	NH4	NO3	TIN	umol/L	stabw	NOx	NO2	Si	PO4	NH4	stabw%	NOx	NO2	Si	PO4	NH4
[truncated: 252 more rows]
